# Supplementary material for: Comparative transcriptomics of biopesticide-treated olives subjected to Xylella infection
Source: Research Square preprint supplement (doi:10.21203/rs.3.rs-8603179/v1), 2026-01-29
Supplement: Supplementary file 1 [file 0d41548bff343d3edcadca25.xlsx]

## Sheet: UP FC >2
List of Differential Expressed Genes (DEGs) fold change (FC) >2 of olives treated with Onion at T2 compared with the same plants at T0.
Gene ID	baseMean	log2FoldChange	lfcSE	stat	pvalue	padj	id gene	Description
OE9A106481	36.148	7.35773	1.5591	4.71922	2.36756e-06	9.98775e-05	OE9A106481	ID=OE9A106481T1;Parent=OE9A106481;Name=OE9A106481T1;product=OE9A106481P1
OE9A046059	8.76525	7.07388	2.54	2.78499	0.00535289	0.0534208	OE9A046059	ID=OE9A046059T1;Parent=OE9A046059;Name=OE9A046059T1;product=OE9A046059P1
OE9A051307	88.1869	6.85057	1.55904	4.3941	1.11234e-05	0.000377886	OE9A051307	ID=OE9A051307T1;Parent=OE9A051307;Name=OE9A051307T1;product=OE9A051307P1;Description=probable glucan 1,3-beta-glucosidase A;Ontology_term=GO:0004553%2C GO:0005975%2C GO:0007015%2C GO:0051015
OE9A088586	21.476	6.75104	1.70175	3.96712	7.27457e-05	0.00183466	OE9A088586	ID=OE9A088586T1;Parent=OE9A088586;Name=OE9A088586T1;product=OE9A088586P1;Description=peroxidase A2-like;Ontology_term=GO:0004601%2C GO:0005576%2C GO:0006804%2C GO:0006979%2C GO:0020037%2C GO:0042744%2C GO:0046872%2C GO:0055114%2C GO:0098869
OE9A079645	6.50428	5.95129	1.89901	3.1339	0.00172502	0.0232014	OE9A079645	ID=OE9A079645T1;Parent=OE9A079645;Name=OE9A079645T1;product=OE9A079645P1;Description=O-linked-mannose beta-1,4-N-acetylglucosaminyltransferase 2-like;Ontology_term=GO:0016020%2C GO:0016757
OE9A033224	77.6118	5.78927	1.43641	4.03036	5.56906e-05	0.00146654	OE9A033224	ID=OE9A033224T1;Parent=OE9A033224;Name=OE9A033224T1;product=OE9A033224P1;Description=glucan 1,3-beta-glucosidase A-like;Ontology_term=GO:0004338%2C GO:0005982%2C GO:0005985%2C GO:0007015%2C GO:0051015
OE9A101363	7.40869	5.57969	1.48582	3.75529	0.000173142	0.00374444	OE9A101363	ID=OE9A101363T1;Parent=OE9A101363;Name=OE9A101363T1;product=OE9A101363P1;Description=monothiol glutaredoxin-s9;Ontology_term=GO:0005623%2C GO:0006118%2C GO:0009055%2C GO:0015035%2C GO:0045454%2C GO:0055114
OE9A087470	8.31249	5.29722	1.25605	4.21737	2.47174e-05	0.000743231	OE9A087470	ID=OE9A087470T1;Parent=OE9A087470;Name=OE9A087470T1;product=OE9A087470P1
OE9A072055	38.2902	5.1714	1.98009	2.6117	0.00900944	0.0764189	OE9A072055	ID=OE9A072055T1;Parent=OE9A072055;Name=OE9A072055T1;product=OE9A072055P1
OE9A079030	83.3932	5.11139	1.1061	4.62107	3.81763e-06	0.000149494	OE9A079030	ID=OE9A079030T1;Parent=OE9A079030;Name=OE9A079030T1;product=OE9A079030P1;Description=receptor kinase At4g00960;Ontology_term=GO:0004672%2C GO:0005524%2C GO:0006468
OE9A106137	132.202	5.01404	1.0469	4.78944	1.6725e-06	7.268e-05	OE9A106137	ID=OE9A106137T1;Parent=OE9A106137;Name=OE9A106137T1;product=OE9A106137P1
OE9A075015	18.4123	4.87324	1.67901	2.90244	0.00370265	0.0406067	OE9A075015	ID=OE9A075015T1;Parent=OE9A075015;Name=OE9A075015T1;product=OE9A075015P1;Description=E3 ubiquitin- ligase PUB23-like;Ontology_term=GO:0004842%2C GO:0005488%2C GO:0016567
OE9A094198	61.0822	4.86439	0.439667	11.0638	1.87957e-28	1.60697e-24	OE9A094198	ID=OE9A094198T1;Parent=OE9A094198;Name=OE9A094198T1;product=OE9A094198P1;Description=cytokinin dehydrogenase 5;Ontology_term=GO:0009690%2C GO:0016614%2C GO:0019139%2C GO:0050660%2C GO:0055114
OE9A110773	7.50428	4.72369	1.2727	3.71156	0.000205988	0.0043342	OE9A110773	ID=OE9A110773T1;Parent=OE9A110773;Name=OE9A110773T1;product=OE9A110773P1;Description=lysosomal Pro-X carboxypeptidase-like;Ontology_term=GO:0004185%2C GO:0006508%2C GO:0008239
OE9A078118	4.10665	4.66785	1.64422	2.83894	0.00452634	0.0471766	OE9A078118	ID=OE9A078118T1;Parent=OE9A078118;Name=OE9A078118T1;product=OE9A078118P1;Description=E3 ubiquitin- ligase PUB24-like;Ontology_term=GO:0004842%2C GO:0005488%2C GO:0016567
OE9A000642	4.33905	4.59237	1.21507	3.77952	0.000157132	0.00347138	OE9A000642	ID=OE9A000642T1;Parent=OE9A000642;Name=OE9A000642T1;product=OE9A000642P1
OE9A011130	17.7208	4.54745	1.48278	3.06683	0.00216338	0.0274907	OE9A011130	ID=OE9A011130T1;Parent=OE9A011130;Name=OE9A011130T1;product=OE9A011130P1;Description=cytochrome b561 and DOMON domain-containing At3g61750-like;Ontology_term=GO:0016020
OE9A091532	5.06987	4.45301	1.77782	2.50476	0.0122535	0.0938741	OE9A091532	ID=OE9A091532T1;Parent=OE9A091532;Name=OE9A091532T1;product=OE9A091532P1;Description=calcium uniporter 4, mitochondrial-like;Ontology_term=GO:0006810%2C GO:0015292%2C GO:0016021
OE9A096921	410.256	4.42211	0.856628	5.16224	2.44017e-07	1.28254e-05	OE9A096921	ID=OE9A096921T1;Parent=OE9A096921;Name=OE9A096921T1;product=OE9A096921P1;Description=pathogenesis-related STH-2-like;Ontology_term=GO:0006952%2C GO:0009607
OE9A029597	14.8725	4.41089	1.08167	4.07784	4.54555e-05	0.00123505	OE9A029597	ID=OE9A029597T1;Parent=OE9A029597;Name=OE9A029597T1;product=OE9A029597P1;Description=geranylgeranyl pyrophosphate synthase, chloroplastic-like;Ontology_term=GO:0004161%2C GO:0004311%2C GO:0004337%2C GO:0006694%2C GO:0009507%2C GO:0010319%2C GO:0016117%2C GO:0033384%2C GO:0033386%2C GO:0045337%2C GO:0046872
OE9A063359	15.4686	4.30262	1.02454	4.19955	2.67449e-05	0.000794878	OE9A063359	ID=OE9A063359T1;Parent=OE9A063359;Name=OE9A063359T1;product=OE9A063359P1;Description=leucine-rich repeat extensin 4;Ontology_term=GO:0005515
OE9A009603	7.23398	4.26659	1.26669	3.3683	0.00075632	0.0123475	OE9A009603	ID=OE9A009603T1;Parent=OE9A009603;Name=OE9A009603T1;product=OE9A009603P1;Description=uncharacterized protein LOC111400433;Ontology_term=GO:0016020
OE9A096329	21.4008	4.2394	0.929879	4.55909	5.13763e-06	0.000193787	OE9A096329	ID=OE9A096329T1;Parent=OE9A096329;Name=OE9A096329T1;product=OE9A096329P1;Description=lysine histidine transporter 1-like;Ontology_term=GO:0016021
OE9A016963	38.7714	4.23014	1.12828	3.74921	0.000177393	0.00382028	OE9A016963	ID=OE9A016963T1;Parent=OE9A016963;Name=OE9A016963T1;product=OE9A016963P1;Description=probable pectate lyase 8;Ontology_term=GO:0030570%2C GO:0045490%2C GO:0046872
OE9A000462	4.70686	4.22164	1.67093	2.52651	0.01152	0.0899202	OE9A000462	ID=OE9A000462T1;Parent=OE9A000462;Name=OE9A000462T1;product=OE9A000462P1;Description=basic 7S globulin-like;Ontology_term=GO:0004190%2C GO:0006508%2C GO:0030163
OE9A048584	9.41221	4.21826	0.905808	4.6569	3.21005e-06	0.000129254	OE9A048584	ID=OE9A048584T1;Parent=OE9A048584;Name=OE9A048584T1;product=OE9A048584P1;Description=probable carboxylesterase 120;Ontology_term=GO:0008152%2C GO:0016787
OE9A076339	7.63432	4.19133	1.59408	2.62932	0.00855566	0.0734669	OE9A076339	ID=OE9A076339T1;Parent=OE9A076339;Name=OE9A076339T1;product=OE9A076339P1;Description=cytokinin dehydrogenase 5;Ontology_term=GO:0009690%2C GO:0016614%2C GO:0019139%2C GO:0050660%2C GO:0055114
OE9A036862	6.00947	4.11415	1.45054	2.83628	0.00456423	0.0474344	OE9A036862	ID=OE9A036862T1;Parent=OE9A036862;Name=OE9A036862T1;product=OE9A036862P1;Description=probable stress-associated endoplasmic reticulum;Ontology_term=GO:0005783%2C GO:0006486%2C GO:0016020%2C GO:0030968
OE9A024296	7.74141	4.1079	1.55506	2.64163	0.0082509	0.0715199	OE9A024296	ID=OE9A024296T1;Parent=OE9A024296;Name=OE9A024296T1;product=OE9A024296P1
OE9A092069	4.03985	4.06826	1.42682	2.85128	0.00435442	0.0459466	OE9A092069	ID=OE9A092069T1;Parent=OE9A092069;Name=OE9A092069T1;product=OE9A092069P1;Description=nudix hydrolase 8-like;Ontology_term=GO:0016787
OE9A099373	48.8896	4.0428	1.55156	2.60563	0.00917043	0.0772747	OE9A099373	ID=OE9A099373T1;Parent=OE9A099373;Name=OE9A099373T1;product=OE9A099373P1;Description=AT-hook motif nuclear-localized 17-like;Ontology_term=GO:0016020
OE9A057491	38.313	4.04158	1.61693	2.49953	0.0124357	0.0948253	OE9A057491	ID=OE9A057491T1;Parent=OE9A057491;Name=OE9A057491T1;product=OE9A057491P1
OE9A110283	6.06451	4.0135	1.22541	3.27523	0.00105574	0.0160794	OE9A110283	ID=OE9A110283T1;Parent=OE9A110283;Name=OE9A110283T1;product=OE9A110283P1
OE9A038120	90.5508	3.98885	1.25023	3.19049	0.00142034	0.0200167	OE9A038120	ID=OE9A038120T1;Parent=OE9A038120;Name=OE9A038120T1;product=OE9A038120P1;Description=pathogenesis-related STH-2-like;Ontology_term=GO:0006952%2C GO:0009607
OE9A011527	17.913	3.98453	1.37489	2.89807	0.00375471	0.0410809	OE9A011527	ID=OE9A011527T1;Parent=OE9A011527;Name=OE9A011527T1;product=OE9A011527P1;Description=U-box domain-containing 21-like;Ontology_term=GO:0004842%2C GO:0005488%2C GO:0016567
OE9A086519	122.967	3.954	0.334945	11.8049	3.68185e-32	9.23406e-28	OE9A086519	ID=OE9A086519T1;Parent=OE9A086519;Name=OE9A086519T1;product=OE9A086519P1;Description=heat stress transcription factor A-7a-like;Ontology_term=GO:0003700%2C GO:0005634%2C GO:0005667%2C GO:0006355%2C GO:0043565%2C GO:0045449
OE9A056861	13.6057	3.9407	1.29129	3.05175	0.00227514	0.0284382	OE9A056861	ID=OE9A056861T1;Parent=OE9A056861;Name=OE9A056861T1;product=OE9A056861P1
OE9A092969	5.11696	3.93924	1.1011	3.57755	0.000346831	0.0066215	OE9A092969	ID=OE9A092969T1;Parent=OE9A092969;Name=OE9A092969T1;product=OE9A092969P1;Description=probable leucine-rich repeat receptor kinase At1g68400;Ontology_term=GO:0004672%2C GO:0005524%2C GO:0006468%2C GO:0016020
OE9A037954	11.0592	3.90326	1.3749	2.83894	0.00452639	0.0471766	OE9A037954	ID=OE9A037954T1;Parent=OE9A037954;Name=OE9A037954T1;product=OE9A037954P1
OE9A017327	15.7099	3.80824	1.48522	2.5641	0.0103444	0.0837773	OE9A017327	ID=OE9A017327T1;Parent=OE9A017327;Name=OE9A017327T1;product=OE9A017327P1
OE9A076251	22.5209	3.76823	0.858134	4.39119	1.1273e-05	0.000381382	OE9A076251	ID=OE9A076251T1;Parent=OE9A076251;Name=OE9A076251T1;product=OE9A076251P1;Description=shikimate O-hydroxycinnamoyltransferase-like;Ontology_term=GO:0016747
OE9A100723	6.03591	3.76257	1.39706	2.69321	0.00707684	0.0646764	OE9A100723	ID=OE9A100723T1;Parent=OE9A100723;Name=OE9A100723T1;product=OE9A100723P1;Description=Leucine-rich repeat;Ontology_term=GO:0005515
OE9A082513	1143.08	3.74953	0.574333	6.5285	6.64332e-11	6.87075e-09	OE9A082513	ID=OE9A082513T1;Parent=OE9A082513;Name=OE9A082513T1;product=OE9A082513P1
OE9A013634	5.8399	3.73672	1.31511	2.84138	0.00449188	0.0469679	OE9A013634	ID=OE9A013634T1;Parent=OE9A013634;Name=OE9A013634T1;product=OE9A013634P1;Description=thaumatin;Ontology_term=GO:0005515%2C GO:0005576%2C GO:0031640%2C GO:0050832
OE9A014186	51.3861	3.72508	1.03675	3.59303	0.000326852	0.00632711	OE9A014186	ID=OE9A014186T1;Parent=OE9A014186;Name=OE9A014186T1;product=OE9A014186P1;Description=probable pectate lyase 8;Ontology_term=GO:0030570%2C GO:0045490%2C GO:0046872
OE9A090761	229.879	3.70691	0.801164	4.62691	3.71166e-06	0.00014605	OE9A090761	ID=OE9A090761T1;Parent=OE9A090761;Name=OE9A090761T1;product=OE9A090761P1;Description=premnaspirodiene oxygenase-like;Ontology_term=GO:0004497%2C GO:0005506%2C GO:0016705%2C GO:0020037%2C GO:0055114
OE9A104343	6.00322	3.68317	1.21324	3.03582	0.00239886	0.029638	OE9A104343	ID=OE9A104343T1;Parent=OE9A104343;Name=OE9A104343T1;product=OE9A104343P1;Description=MLP 34;Ontology_term=GO:0006952%2C GO:0009607
OE9A100467	122.405	3.67615	0.550626	6.67631	2.45037e-11	2.73259e-09	OE9A100467	ID=OE9A100467T1;Parent=OE9A100467;Name=OE9A100467T1;product=OE9A100467P1;Description=wall-associated receptor kinase-like 8;Ontology_term=GO:0004672%2C GO:0005509%2C GO:0005515%2C GO:0005524%2C GO:0006468%2C GO:0030247
OE9A040328	7.12617	3.64615	1.27463	2.86055	0.00422911	0.0449347	OE9A040328	ID=OE9A040328T1;Parent=OE9A040328;Name=OE9A040328T1;product=OE9A040328P1;Description=ethylene-responsive transcription factor ERF023-like;Ontology_term=GO:0003677%2C GO:0003700%2C GO:0005667%2C GO:0006355%2C GO:0045449
OE9A047084	1555.87	3.61726	0.80276	4.50602	6.60545e-06	0.000242033	OE9A047084	ID=OE9A047084T1;Parent=OE9A047084;Name=OE9A047084T1;product=OE9A047084P1;Description=pathogenesis-related STH-2-like;Ontology_term=GO:0006952%2C GO:0009607
OE9A048798	28.5674	3.60964	1.21039	2.98221	0.00286178	0.0336397	OE9A048798	ID=OE9A048798T1;Parent=OE9A048798;Name=OE9A048798T1;product=OE9A048798P1;Description=cytochrome P450 71A6-like;Ontology_term=GO:0005506%2C GO:0016705%2C GO:0020037%2C GO:0055114
OE9A105742	5.93307	3.56701	1.37572	2.59284	0.00951863	0.0792915	OE9A105742	ID=OE9A105742T1;Parent=OE9A105742;Name=OE9A105742T1;product=OE9A105742P1
OE9A101007	27.671	3.55365	0.944267	3.76339	0.000167622	0.00364486	OE9A101007	ID=OE9A101007T1;Parent=OE9A101007;Name=OE9A101007T1;product=OE9A101007P1;Description=vetispiradiene synthase 2-like;Ontology_term=GO:0000287%2C GO:0008152%2C GO:0010333
OE9A038370	7.77814	3.55263	0.894229	3.97284	7.10203e-05	0.00179859	OE9A038370	ID=OE9A038370T1;Parent=OE9A038370;Name=OE9A038370T1;product=OE9A038370P1;Description=ankyrin repeat-containing BDA1-like;Ontology_term=GO:0005515%2C GO:0016020
OE9A088075	9.21348	3.53718	0.858405	4.12065	3.77807e-05	0.00106945	OE9A088075	ID=OE9A088075T1;Parent=OE9A088075;Name=OE9A088075T1;product=OE9A088075P1;Description=ankyrin repeat-containing BDA1-like;Ontology_term=GO:0016020
OE9A051438	422.615	3.52042	0.836029	4.21088	2.54374e-05	0.00076131	OE9A051438	ID=OE9A051438T1;Parent=OE9A051438;Name=OE9A051438T1;product=OE9A051438P1;Description=pathogenesis-related STH-2-like;Ontology_term=GO:0006952%2C GO:0009607
OE9A083404	519.884	3.50053	0.537304	6.51499	7.26924e-11	7.42824e-09	OE9A083404	ID=OE9A083404T1;Parent=OE9A083404;Name=OE9A083404T1;product=OE9A083404P1
OE9A062996	18.7111	3.47466	1.09177	3.18259	0.00145965	0.0204143	OE9A062996	ID=OE9A062996T1;Parent=OE9A062996;Name=OE9A062996T1;product=OE9A062996P1
OE9A042238	8.14363	3.43639	1.13822	3.01908	0.00253543	0.0307768	OE9A042238	ID=OE9A042238T1;Parent=OE9A042238;Name=OE9A042238T1;product=OE9A042238P1;Description=G-type lectin S-receptor-like serine threonine- kinase RLK1;Ontology_term=GO:0004674%2C GO:0005524%2C GO:0006468%2C GO:0009069%2C GO:0016021
OE9A090097	14.1484	3.43008	0.893778	3.83773	0.000124179	0.00287982	OE9A090097	ID=OE9A090097T1;Parent=OE9A090097;Name=OE9A090097T1;product=OE9A090097P1;Description=cytochrome P450 78A7-like;Ontology_term=GO:0004497%2C GO:0005506%2C GO:0016021%2C GO:0016705%2C GO:0020037%2C GO:0055114
OE9A000235	9.69814	3.42918	1.16137	2.95271	0.00314993	0.0360038	OE9A000235	ID=OE9A000235T1;Parent=OE9A000235;Name=OE9A000235T1;product=OE9A000235P1;Description=B3 domain-containing transcription factor FUS3-like;Ontology_term=GO:0003677%2C GO:0050794
OE9A101653	41.3393	3.42838	0.891619	3.84512	0.000120492	0.00282106	OE9A101653	ID=OE9A101653T1;Parent=OE9A101653;Name=OE9A101653T1;product=OE9A101653P1;Description=RING-H2 finger ATL78-like;Ontology_term=GO:0005515%2C GO:0008270%2C GO:0016021
OE9A090970	11.2135	3.41477	0.724021	4.7164	2.40059e-06	0.000101105	OE9A090970	ID=OE9A090970T1;Parent=OE9A090970;Name=OE9A090970T1;product=OE9A090970P1;Description=receptor kinase At3g47110;Ontology_term=GO:0004672%2C GO:0005515%2C GO:0005524%2C GO:0006468
OE9A119264	134.003	3.38983	1.21501	2.78997	0.0052713	0.0527726	OE9A119264	ID=OE9A119264T1;Parent=OE9A119264;Name=OE9A119264T1;product=OE9A119264P1;Description=Vacuolar cation proton exchanger 3;Ontology_term=GO:0006885%2C GO:0015369%2C GO:0016021%2C GO:0070588
OE9A064110	4.98348	3.38843	1.05185	3.22139	0.00127572	0.0184968	OE9A064110	ID=OE9A064110T1;Parent=OE9A064110;Name=OE9A064110T1;product=OE9A064110P1
OE9A049944	74.5259	3.37622	0.977915	3.45247	0.000555481	0.00978539	OE9A049944	ID=OE9A049944T1;Parent=OE9A049944;Name=OE9A049944T1;product=OE9A049944P1;Description=phenylalanine ammonia-lyase;Ontology_term=GO:0005737%2C GO:0006559%2C GO:0006570%2C GO:0009800%2C GO:0009821%2C GO:0045548
OE9A108428	9.22878	3.36765	0.794312	4.23971	2.23811e-05	0.000683012	OE9A108428	ID=OE9A108428T1;Parent=OE9A108428;Name=OE9A108428T1;product=OE9A108428P1;Description=RADIALIS-like 3;Ontology_term=GO:0003677%2C GO:0005634
OE9A119429	29.0411	3.36643	0.967771	3.47854	0.000504152	0.00901114	OE9A119429	ID=OE9A119429T1;Parent=OE9A119429;Name=OE9A119429T1;product=OE9A119429P1;Description=premnaspirodiene oxygenase-like;Ontology_term=GO:0005506%2C GO:0016020%2C GO:0016705%2C GO:0020037%2C GO:0055114
OE9A119528	13.7308	3.36562	1.09611	3.07052	0.00213687	0.0272952	OE9A119528	ID=OE9A119528T1;Parent=OE9A119528;Name=OE9A119528T1;product=OE9A119528P1;Description=cannabidiolic acid synthase-like;Ontology_term=GO:0016614%2C GO:0050660%2C GO:0055114
OE9A008605	9.5091	3.35733	1.04733	3.2056	0.00134779	0.019291	OE9A008605	ID=OE9A008605T1;Parent=OE9A008605;Name=OE9A008605T1;product=OE9A008605P1;Description=heavy metal-associated isoprenylated plant 45;Ontology_term=GO:0030001%2C GO:0046872
OE9A046869	23.1493	3.35721	0.596312	5.62996	1.80251e-08	1.19773e-06	OE9A046869	ID=OE9A046869T1;Parent=OE9A046869;Name=OE9A046869T1;product=OE9A046869P1;Description=probable carboxylesterase 120;Ontology_term=GO:0008152%2C GO:0016787
OE9A112840	4.90398	3.35686	0.984398	3.41006	0.000649479	0.0109885	OE9A112840	ID=OE9A112840T1;Parent=OE9A112840;Name=OE9A112840T1;product=OE9A112840P1;Description=squalene monooxygenase-like;Ontology_term=GO:0004506%2C GO:0009414%2C GO:0016021%2C GO:0016114%2C GO:0016126%2C GO:0050660%2C GO:0055114
OE9A081517	31.3035	3.35283	0.876005	3.82741	0.000129501	0.0029924	OE9A081517	ID=OE9A081517T1;Parent=OE9A081517;Name=OE9A081517T1;product=OE9A081517P1
OE9A033898	63.8964	3.33251	0.466131	7.1493	8.72191e-13	1.24977e-10	OE9A033898	ID=OE9A033898T1;Parent=OE9A033898;Name=OE9A033898T1;product=OE9A033898P1;Description=AT-hook motif nuclear-localized 25-like;Ontology_term=GO:0005488
OE9A059238	18.4031	3.32863	1.04124	3.19679	0.00138965	0.0197251	OE9A059238	ID=OE9A059238T1;Parent=OE9A059238;Name=OE9A059238T1;product=OE9A059238P1
OE9A037591	73.1349	3.30589	1.30396	2.53526	0.0112363	0.0884318	OE9A037591	ID=OE9A037591T1;Parent=OE9A037591;Name=OE9A037591T1;product=OE9A037591P1;Description=laccase-4-like;Ontology_term=GO:0005507%2C GO:0046274%2C GO:0048046%2C GO:0052716%2C GO:0055114
OE9A080734	480.188	3.30526	0.478004	6.91472	4.68798e-12	6.04866e-10	OE9A080734	ID=OE9A080734T1;Parent=OE9A080734;Name=OE9A080734T1;product=OE9A080734P1
OE9A041564	11.8001	3.3023	0.743082	4.44407	8.82749e-06	0.000311011	OE9A041564	ID=OE9A041564T1;Parent=OE9A041564;Name=OE9A041564T1;product=OE9A041564P1;Description=dammarenediol II synthase-like;Ontology_term=GO:0016021%2C GO:0016866
OE9A049747	3.98618	3.28241	1.31799	2.49047	0.0127574	0.0968378	OE9A049747	ID=OE9A049747T1;Parent=OE9A049747;Name=OE9A049747T1;product=OE9A049747P1;Description=;Ontology_term=GO:0004672%2C GO:0005524%2C GO:0006468
OE9A044770	35.5882	3.24141	0.748912	4.32816	1.50359e-05	0.000488172	OE9A044770	ID=OE9A044770T1;Parent=OE9A044770;Name=OE9A044770T1;product=OE9A044770P1;Description=copal-8-ol diphosphate hydratase, chloroplastic-like;Ontology_term=GO:0000287%2C GO:0010333%2C GO:0016102%2C GO:0050559
OE9A042037	55.5615	3.23468	0.794467	4.07151	4.67089e-05	0.00126242	OE9A042037	ID=OE9A042037T1;Parent=OE9A042037;Name=OE9A042037T1;product=OE9A042037P1;Description=vetispiradiene synthase 2-like;Ontology_term=GO:0000287%2C GO:0008152%2C GO:0010333
OE9A047912	4.24972	3.22675	1.05336	3.06329	0.00218916	0.0277146	OE9A047912	ID=OE9A047912T1;Parent=OE9A047912;Name=OE9A047912T1;product=OE9A047912P1;Description=germin 11-1;Ontology_term=GO:0005576%2C GO:0005618%2C GO:0030145%2C GO:0033609%2C GO:0045735%2C GO:0046487%2C GO:0046564
OE9A096612	5.97254	3.21141	0.945633	3.39604	0.000683676	0.0114762	OE9A096612	ID=OE9A096612T1;Parent=OE9A096612;Name=OE9A096612T1;product=OE9A096612P1;Description=S-type anion channel SLAH4-like;Ontology_term=GO:0016021%2C GO:0055085
OE9A081289	18.6913	3.20261	0.886268	3.61359	0.00030199	0.00592182	OE9A081289	ID=OE9A081289T1;Parent=OE9A081289;Name=OE9A081289T1;product=OE9A081289P1;Description=serine threonine- kinase Nek6;Ontology_term=GO:0004672%2C GO:0005524%2C GO:0006468
OE9A095147	49.9939	3.18703	0.997166	3.19609	0.00139303	0.0197402	OE9A095147	ID=OE9A095147T1;Parent=OE9A095147;Name=OE9A095147T1;product=OE9A095147P1;Description=phenylalanine ammonia-lyase;Ontology_term=GO:0005737%2C GO:0006559%2C GO:0006570%2C GO:0009800%2C GO:0009821%2C GO:0045548
OE9A061082	92.5785	3.18508	0.953348	3.34094	0.000834956	0.0133849	OE9A061082	ID=OE9A061082T1;Parent=OE9A061082;Name=OE9A061082T1;product=OE9A061082P1
OE9A120682	430.358	3.17866	0.650499	4.8865	1.02644e-06	4.67624e-05	OE9A120682	ID=OE9A120682T1;Parent=OE9A120682;Name=OE9A120682T1;product=OE9A120682P1
OE9A035049	4.52244	3.16328	1.14888	2.75336	0.00589871	0.0571492	OE9A035049	ID=OE9A035049T1;Parent=OE9A035049;Name=OE9A035049T1;product=OE9A035049P1;Description=shikimate O-hydroxycinnamoyltransferase-like;Ontology_term=GO:0016747
OE9A035730	97.4248	3.15965	0.590301	5.3526	8.66998e-08	4.97486e-06	OE9A035730	ID=OE9A035730T1;Parent=OE9A035730;Name=OE9A035730T1;product=OE9A035730P1;Description=lachrymatory-factor synthase;Ontology_term=GO:0004864%2C GO:0004872%2C GO:0005634%2C GO:0005737%2C GO:0009738%2C GO:0010427%2C GO:0080163
OE9A031116	8.14419	3.13658	0.968207	3.23957	0.00119709	0.0176969	OE9A031116	ID=OE9A031116T1;Parent=OE9A031116;Name=OE9A031116T1;product=OE9A031116P1;Description=G-type lectin S-receptor-like serine threonine- kinase At4g27290 isoform X1;Ontology_term=GO:0004674%2C GO:0009069%2C GO:0016310
OE9A031523	76.2738	3.13207	0.624195	5.01778	5.22716e-07	2.55374e-05	OE9A031523	ID=OE9A031523T1;Parent=OE9A031523;Name=OE9A031523T1;product=OE9A031523P1;Description=lachrymatory-factor synthase;Ontology_term=GO:0004864%2C GO:0004872%2C GO:0005634%2C GO:0005737%2C GO:0009738%2C GO:0010427%2C GO:0080163
OE9A028052	3.96088	3.10902	1.04127	2.98581	0.00282833	0.0333973	OE9A028052	ID=OE9A028052T1;Parent=OE9A028052;Name=OE9A028052T1;product=OE9A028052P1;md5=58b0bcfcf77aa375c283f9a44c2d168d;INTERPRO=<table><tr><th>DB</th><th>ID</th><th>Description</th></tr><tr><td>Gene3D</td><td>G3DSA:1.10.510.10</td><td></td></tr><tr><td>Gene3D</td><td>G3DSA:2.10.25.10</td><td></td></tr><tr><td>Gene3D</td><td>G3DSA:2.40.155.10</td><td></td></tr><tr><td>Gene3D</td><td>G3DSA:2.60.120.200</td>…
OE9A120982	51.9457	3.08954	0.995885	3.10231	0.00192016	0.0252306	OE9A120982	ID=OE9A120982T1;Parent=OE9A120982;Name=OE9A120982T1;product=OE9A120982P1;Description=premnaspirodiene oxygenase-like;Ontology_term=GO:0004497%2C GO:0005506%2C GO:0016021%2C GO:0016705%2C GO:0020037%2C GO:0055114
OE9A053162	15.552	3.07727	0.645424	4.76782	1.8623e-06	7.97433e-05	OE9A053162	ID=OE9A053162T1;Parent=OE9A053162;Name=OE9A053162T1;product=OE9A053162P1
OE9A004056	47.5299	3.07341	0.810297	3.79294	0.000148873	0.00333489	OE9A004056	ID=OE9A004056T1;Parent=OE9A004056;Name=OE9A004056T1;product=OE9A004056P1;Description=premnaspirodiene oxygenase-like;Ontology_term=GO:0004497%2C GO:0005506%2C GO:0016021%2C GO:0016705%2C GO:0020037%2C GO:0055114
OE9A023146	12.4379	3.05278	1.09949	2.77655	0.00549394	0.0542812	OE9A023146	ID=OE9A023146T1;Parent=OE9A023146;Name=OE9A023146T1;product=OE9A023146P1;Description=calmodulin 11;Ontology_term=GO:0005509
OE9A024145	32.6443	3.04081	0.879593	3.45706	0.000546102	0.00965332	OE9A024145	ID=OE9A024145T1;Parent=OE9A024145;Name=OE9A024145T1;product=OE9A024145P1
OE9A069039	67.2917	3.00963	0.385642	7.80422	5.98702e-15	1.36517e-12	OE9A069039	ID=OE9A069039T1;Parent=OE9A069039;Name=OE9A069039T1;product=OE9A069039P1;Description=wall-associated receptor kinase-like 8;Ontology_term=GO:0004672%2C GO:0005509%2C GO:0005515%2C GO:0005524%2C GO:0006468%2C GO:0016020
OE9A087555	12.2933	3.00467	1.1673	2.57404	0.0100518	0.0819254	OE9A087555	ID=OE9A087555T1;Parent=OE9A087555;Name=OE9A087555T1;product=OE9A087555P1;Description=G-type lectin S-receptor-like serine threonine- kinase At4g27290 isoform X1;Ontology_term=GO:0004674%2C GO:0005524%2C GO:0006468%2C GO:0009069
OE9A025127	156.914	3.00017	0.907843	3.30473	0.00095069	0.0148866	OE9A025127	ID=OE9A025127T1;Parent=OE9A025127;Name=OE9A025127T1;product=OE9A025127P1;Description=cellulose synthase A catalytic subunit 4 [UDP-forming];Ontology_term=GO:0005515%2C GO:0005886%2C GO:0005982%2C GO:0005985%2C GO:0006011%2C GO:0008270%2C GO:0009834%2C GO:0016021%2C GO:0016760%2C GO:0030244%2C GO:0042742%2C GO:0050832%2C GO:0071555
OE9A083916	149.839	2.99422	0.926953	3.23018	0.00123714	0.0181012	OE9A083916	ID=OE9A083916T1;Parent=OE9A083916;Name=OE9A083916T1;product=OE9A083916P1
OE9A011583	198.493	2.99141	0.522223	5.72821	1.01494e-08	6.94195e-07	OE9A011583	ID=OE9A011583T1;Parent=OE9A011583;Name=OE9A011583T1;product=OE9A011583P1;Description=probable 1-deoxy-D-xylulose-5-phosphate synthase 2, chloroplastic;Ontology_term=GO:0006694%2C GO:0008661%2C GO:0016114
OE9A102452	10.3258	2.9816	0.547989	5.44097	5.29898e-08	3.19796e-06	OE9A102452	ID=OE9A102452T1;Parent=OE9A102452;Name=OE9A102452T1;product=OE9A102452P1
OE9A060505	1411.69	2.98106	0.549546	5.42458	5.80894e-08	3.48931e-06	OE9A060505	ID=OE9A060505T1;Parent=OE9A060505;Name=OE9A060505T1;product=OE9A060505P1;Description=endochitinase EP3-like;Ontology_term=GO:0004568%2C GO:0005975%2C GO:0006032%2C GO:0008061%2C GO:0016998
OE9A050526	90.019	2.97617	1.07183	2.77671	0.00549121	0.0542752	OE9A050526	ID=OE9A050526T1;Parent=OE9A050526;Name=OE9A050526T1;product=OE9A050526P1;Description=vetispiradiene synthase 2-like;Ontology_term=GO:0000287%2C GO:0008152%2C GO:0010333
OE9A086297	19.4903	2.97552	1.04395	2.85026	0.00436836	0.0460329	OE9A086297	ID=OE9A086297T1;Parent=OE9A086297;Name=OE9A086297T1;product=OE9A086297P1;Description=DNA-3-methyladenine glycosylase;Ontology_term=GO:0006284%2C GO:0008725
OE9A048337	4.35876	2.97499	0.94865	3.13603	0.00171252	0.023106	OE9A048337	ID=OE9A048337T1;Parent=OE9A048337;Name=OE9A048337T1;product=OE9A048337P1;Description=transcription factor bHLH18-like;Ontology_term=GO:0005488%2C GO:0008152%2C GO:0016491
OE9A077229	71.9004	2.96634	1.13462	2.61439	0.00893877	0.0760685	OE9A077229	ID=OE9A077229T1;Parent=OE9A077229;Name=OE9A077229T1;product=OE9A077229P1;Description=vetispiradiene synthase 2-like;Ontology_term=GO:0000287%2C GO:0008152%2C GO:0010333
OE9A038673	37.0197	2.9647	0.851761	3.48067	0.000500157	0.00895222	OE9A038673	ID=OE9A038673T1;Parent=OE9A038673;Name=OE9A038673T1;product=OE9A038673P1;md5=bda5a1d117c767dc66723db0c63e4da9;INTERPRO=<table><tr><th>DB</th><th>ID</th><th>Description</th></tr><tr><td>Gene3D</td><td>G3DSA:1.10.510.10</td><td></td></tr><tr><td>Gene3D</td><td>G3DSA:2.60.120.200</td><td></td></tr><tr><td>Gene3D</td><td>G3DSA:3.30.200.20</td><td></td></tr><tr><td>PANTHER</td><td>PTHR27001</td><td></…
OE9A044477	95.1065	2.9629	0.78587	3.77022	0.000163102	0.00357251	OE9A044477	ID=OE9A044477T1;Parent=OE9A044477;Name=OE9A044477T1;product=OE9A044477P1;Description=bifunctional pinoresinol-lariciresinol reductase;Ontology_term=GO:0010283%2C GO:0010284%2C GO:0055114%2C GO:1902125%2C GO:1902131%2C GO:1902132%2C GO:1902138
OE9A021130	54.896	2.95593	0.960339	3.07801	0.0020839	0.0268999	OE9A021130	ID=OE9A021130T1;Parent=OE9A021130;Name=OE9A021130T1;product=OE9A021130P1;Description=GDSL esterase lipase APG;Ontology_term=GO:0016788%2C GO:0052886%2C GO:0052887%2C GO:0052889%2C GO:0055114
OE9A104942	15.2136	2.947	0.848203	3.47441	0.000511979	0.00911927	OE9A104942	ID=OE9A104942T1;Parent=OE9A104942;Name=OE9A104942T1;product=OE9A104942P1;Description=germin 2-1 isoform X1;Ontology_term=GO:0005576%2C GO:0016021%2C GO:0030145%2C GO:0045735
OE9A003657	268.433	2.94538	0.328904	8.95513	3.39326e-19	1.97804e-16	OE9A003657	ID=OE9A003657T1;Parent=OE9A003657;Name=OE9A003657T1;product=OE9A003657P1;Description=ammonium transporter 3 member 1-like;Ontology_term=GO:0005887%2C GO:0008519%2C GO:0015695%2C GO:0019740%2C GO:0072488
OE9A006366	12.8633	2.93209	0.889173	3.29754	0.000975349	0.0151505	OE9A006366	ID=OE9A006366T1;Parent=OE9A006366;Name=OE9A006366T1;product=OE9A006366P1;Description=4-coumarate-- ligase 1;Ontology_term=GO:0005524%2C GO:0009805%2C GO:0009809%2C GO:0009811%2C GO:0016207
OE9A053718	322.001	2.9303	0.287388	10.1963	2.05932e-24	4.80178e-21	OE9A053718	ID=OE9A053718T1;Parent=OE9A053718;Name=OE9A053718T1;product=OE9A053718P1;Description=nitrate reductase;Ontology_term=GO:0006809%2C GO:0009325%2C GO:0009703%2C GO:0020037%2C GO:0030151%2C GO:0042128%2C GO:0043546%2C GO:0050464%2C GO:0055114
OE9A065575	156.332	2.90724	0.469046	6.19818	5.71181e-10	5.0518e-08	OE9A065575	ID=OE9A065575T1;Parent=OE9A065575;Name=OE9A065575T1;product=OE9A065575P1;Description=lysine histidine transporter 1-like;Ontology_term=GO:0016021
OE9A063911	422.688	2.89164	0.287847	10.0458	9.58855e-24	1.5371e-20	OE9A063911	ID=OE9A063911T1;Parent=OE9A063911;Name=OE9A063911T1;product=OE9A063911P1;Description=nitrate reductase;Ontology_term=GO:0006809%2C GO:0009325%2C GO:0009703%2C GO:0020037%2C GO:0030151%2C GO:0042128%2C GO:0043546%2C GO:0050464%2C GO:0055114
OE9A025629	30.3051	2.8907	0.770355	3.75243	0.000175132	0.00378111	OE9A025629	ID=OE9A025629T1;Parent=OE9A025629;Name=OE9A025629T1;product=OE9A025629P1;Description=premnaspirodiene oxygenase-like;Ontology_term=GO:0005506%2C GO:0016705%2C GO:0020037%2C GO:0055114
OE9A008662	8.32727	2.87559	0.809422	3.55264	0.000381382	0.00716635	OE9A008662	ID=OE9A008662T1;Parent=OE9A008662;Name=OE9A008662T1;product=OE9A008662P1
OE9A054892	11.6222	2.85831	0.627098	4.558	5.16426e-06	0.000194505	OE9A054892	ID=OE9A054892T1;Parent=OE9A054892;Name=OE9A054892T1;product=OE9A054892P1
OE9A045303	24.4901	2.85358	0.761076	3.7494	0.000177257	0.00382028	OE9A045303	ID=OE9A045303T1;Parent=OE9A045303;Name=OE9A045303T1;product=OE9A045303P1;Description=cytochrome P450 84A1-like;Ontology_term=GO:0004497%2C GO:0005506%2C GO:0016021%2C GO:0016705%2C GO:0020037%2C GO:0055114
OE9A098085	265.477	2.84675	0.615378	4.62602	3.72755e-06	0.000146414	OE9A098085	ID=OE9A098085T1;Parent=OE9A098085;Name=OE9A098085T1;product=OE9A098085P1;Description=receptor kinase 5;Ontology_term=GO:0004672%2C GO:0005515%2C GO:0005524%2C GO:0006468%2C GO:0016020
OE9A081718	13.0622	2.84283	0.57102	4.97851	6.40754e-07	3.02665e-05	OE9A081718	ID=OE9A081718T1;Parent=OE9A081718;Name=OE9A081718T1;product=OE9A081718P1
OE9A121332	5.972	2.83149	1.11436	2.54091	0.0110565	0.0876894	OE9A121332	ID=OE9A121332T1;Parent=OE9A121332;Name=OE9A121332T1;product=OE9A121332P1;Description=rust resistance kinase Lr10-like;Ontology_term=GO:0004672%2C GO:0005524%2C GO:0006468
OE9A120430	1213.27	2.82663	1.09022	2.59272	0.00952202	0.0792915	OE9A120430	ID=OE9A120430T1;Parent=OE9A120430;Name=OE9A120430T1;product=OE9A120430P1;Description=lipid-transfer DIR1;Ontology_term=GO:0006508%2C GO:0008233
OE9A044909	25.2947	2.82223	0.770877	3.66106	0.000251172	0.00509676	OE9A044909	ID=OE9A044909T1;Parent=OE9A044909;Name=OE9A044909T1;product=OE9A044909P1;Description=metalloendo ase 2-MMP-like;Ontology_term=GO:0004222%2C GO:0005509%2C GO:0006508%2C GO:0008270%2C GO:0031012
OE9A027745	4.47164	2.81151	0.880016	3.19484	0.00139908	0.019815	OE9A027745	ID=OE9A027745T1;Parent=OE9A027745;Name=OE9A027745T1;product=OE9A027745P1
OE9A075155	8.04214	2.78946	0.959784	2.90634	0.00365685	0.0402552	OE9A075155	ID=OE9A075155T1;Parent=OE9A075155;Name=OE9A075155T1;product=OE9A075155P1;Description=amino-acid permease BAT1 homolog;Ontology_term=GO:0005887%2C GO:0015179%2C GO:0015297%2C GO:1902475
OE9A060010	201.116	2.78528	0.412617	6.75028	1.47562e-11	1.72037e-09	OE9A060010	ID=OE9A060010T1;Parent=OE9A060010;Name=OE9A060010T1;product=OE9A060010P1;Description=wall-associated receptor kinase-like 8;Ontology_term=GO:0004672%2C GO:0005515%2C GO:0005524%2C GO:0006468
OE9A093824	118.735	2.78159	0.937682	2.96645	0.00301255	0.034874	OE9A093824	ID=OE9A093824T1;Parent=OE9A093824;Name=OE9A093824T1;product=OE9A093824P1;Description=cytochrome P450 71A6-like;Ontology_term=GO:0005506%2C GO:0016705%2C GO:0020037%2C GO:0055114
OE9A035912	7.60669	2.77185	0.696879	3.97752	6.96372e-05	0.00177195	OE9A035912	ID=OE9A035912T1;Parent=OE9A035912;Name=OE9A035912T1;product=OE9A035912P1;Description=ankyrin repeat-containing BDA1-like;Ontology_term=GO:0005515%2C GO:0016020
OE9A080512	112.005	2.77041	0.46913	5.90541	3.5177e-09	2.65369e-07	OE9A080512	ID=OE9A080512T1;Parent=OE9A080512;Name=OE9A080512T1;product=OE9A080512P1
OE9A075288	508.181	2.76432	0.438845	6.29907	2.99434e-10	2.78268e-08	OE9A075288	ID=OE9A075288T1;Parent=OE9A075288;Name=OE9A075288T1;product=OE9A075288P1;Description=high-affinity nitrate transporter -like;Ontology_term=GO:0010167%2C GO:0015706%2C GO:0016021
OE9A100427	362.969	2.76232	0.453357	6.09304	1.10785e-09	9.25578e-08	OE9A100427	ID=OE9A100427T1;Parent=OE9A100427;Name=OE9A100427T1;product=OE9A100427P1;Description=NRT1 PTR FAMILY -like;Ontology_term=GO:0005215%2C GO:0006810%2C GO:0016021
OE9A071015	14.512	2.74662	0.751231	3.65616	0.000256025	0.00516663	OE9A071015	ID=OE9A071015T1;Parent=OE9A071015;Name=OE9A071015T1;product=OE9A071015P1
OE9A093242	28.5988	2.73516	0.547204	4.99842	5.78013e-07	2.78151e-05	OE9A093242	ID=OE9A093242T1;Parent=OE9A093242;Name=OE9A093242T1;product=OE9A093242P1;Description=NRT1 PTR FAMILY -like;Ontology_term=GO:0005215%2C GO:0006810%2C GO:0016021
OE9A118859	25.5441	2.72457	1.00507	2.71082	0.00671176	0.0622604	OE9A118859	ID=OE9A118859T1;Parent=OE9A118859;Name=OE9A118859T1;product=OE9A118859P1;Description=pathogenesis-related STH-2-like;Ontology_term=GO:0006952%2C GO:0009607
OE9A011091	7.03611	2.72012	1.05592	2.57606	0.00999335	0.0815525	OE9A011091	ID=OE9A011091T1;Parent=OE9A011091;Name=OE9A011091T1;product=OE9A011091P1;Description=mediator of RNA polymerase II transcription subunit 33A;Ontology_term=GO:0016021%2C GO:0016592%2C GO:2000762
OE9A104280	268.687	2.71732	0.402887	6.74463	1.53415e-11	1.7725e-09	OE9A104280	ID=OE9A104280T1;Parent=OE9A104280;Name=OE9A104280T1;product=OE9A104280P1;Description=probable polyamine transporter At1g31830 isoform X1;Ontology_term=GO:0003333%2C GO:0015171%2C GO:0016021
OE9A106052	5089.19	2.71508	0.614425	4.4189	9.92036e-06	0.000342459	OE9A106052	ID=OE9A106052T1;Parent=OE9A106052;Name=OE9A106052T1;product=OE9A106052P1;Description=pathogenesis-related STH-2-like;Ontology_term=GO:0006952%2C GO:0009607
OE9A036713	132.795	2.71476	0.883769	3.0718	0.00212771	0.0272171	OE9A036713	ID=OE9A036713T1;Parent=OE9A036713;Name=OE9A036713T1;product=OE9A036713P1;Description=cytochrome P450 71A6-like;Ontology_term=GO:0005506%2C GO:0016705%2C GO:0020037%2C GO:0055114
OE9A113459	12.5987	2.71055	0.976866	2.77474	0.00552463	0.0545425	OE9A113459	ID=OE9A113459T1;Parent=OE9A113459;Name=OE9A113459T1;product=OE9A113459P1;Description=probable LRR receptor-like serine threonine- kinase At1g07650 isoform X2;Ontology_term=GO:0004672%2C GO:0005524%2C GO:0006468%2C GO:0016021
OE9A015439	9.11518	2.70362	0.888917	3.04148	0.00235417	0.0291419	OE9A015439	ID=OE9A015439T1;Parent=OE9A015439;Name=OE9A015439T1;product=OE9A015439P1;Description=Auxin response factor 17
OE9A023080	4.71498	2.70214	1.0769	2.50917	0.0121014	0.0929759	OE9A023080	ID=OE9A023080T1;Parent=OE9A023080;Name=OE9A023080T1;product=OE9A023080P1
OE9A083122	26.8994	2.69424	0.624855	4.31179	1.61938e-05	0.000521803	OE9A083122	ID=OE9A083122T1;Parent=OE9A083122;Name=OE9A083122T1;product=OE9A083122P1;Description=LRR receptor-like serine threonine- kinase GSO1;Ontology_term=GO:0005515
OE9A065154	63.8222	2.69255	0.592674	4.54305	5.54454e-06	0.000207004	OE9A065154	ID=OE9A065154T1;Parent=OE9A065154;Name=OE9A065154T1;product=OE9A065154P1;Description=F-box kelch-repeat At1g23390;Ontology_term=GO:0005515
OE9A030206	70.3674	2.69216	0.691085	3.89555	9.79756e-05	0.00236627	OE9A030206	ID=OE9A030206T1;Parent=OE9A030206;Name=OE9A030206T1;product=OE9A030206P1;Description=premnaspirodiene oxygenase-like;Ontology_term=GO:0004497%2C GO:0005506%2C GO:0016021%2C GO:0016705%2C GO:0020037%2C GO:0055114
OE9A006125	81.309	2.68955	0.423443	6.35162	2.13054e-10	2.04668e-08	OE9A006125	ID=OE9A006125T1;Parent=OE9A006125;Name=OE9A006125T1;product=OE9A006125P1;Description=lysosomal Pro-X carboxypeptidase;Ontology_term=GO:0004180%2C GO:0006508%2C GO:0008236
OE9A043562	50.9	2.68734	0.665155	4.04017	5.34126e-05	0.00141673	OE9A043562	ID=OE9A043562T1;Parent=OE9A043562;Name=OE9A043562T1;product=OE9A043562P1;Description=premnaspirodiene oxygenase-like;Ontology_term=GO:0005506%2C GO:0016020%2C GO:0016705%2C GO:0020037%2C GO:0055114
OE9A085084	406.887	2.67874	0.745094	3.59517	0.000324178	0.00628484	OE9A085084	ID=OE9A085084T1;Parent=OE9A085084;Name=OE9A085084T1;product=OE9A085084P1;Description=(-)-isopiperitenol (-)-carveol dehydrogenase, mitochondrial-like;Ontology_term=GO:0016491
OE9A055668	32.3889	2.67012	0.687304	3.88492	0.000102365	0.00245194	OE9A055668	ID=OE9A055668T1;Parent=OE9A055668;Name=OE9A055668T1;product=OE9A055668P1
OE9A058733	28.9147	2.66705	0.614906	4.33733	1.44226e-05	0.000471242	OE9A058733	ID=OE9A058733T1;Parent=OE9A058733;Name=OE9A058733T1;product=OE9A058733P1;Description=STRICTOSIDINE SYNTHASE-LIKE 6-like;Ontology_term=GO:0005783%2C GO:0016021%2C GO:0016114%2C GO:0016788%2C GO:0016844%2C GO:0042432
OE9A033482	11.1154	2.65536	0.912776	2.9091	0.00362474	0.0399875	OE9A033482	ID=OE9A033482T1;Parent=OE9A033482;Name=OE9A033482T1;product=OE9A033482P1;Description=3 -5 exoribonuclease 1-like;Ontology_term=GO:0003676
OE9A034191	17.0769	2.65411	0.718385	3.69454	0.000220283	0.00457043	OE9A034191	ID=OE9A034191T1;Parent=OE9A034191;Name=OE9A034191T1;product=OE9A034191P1
OE9A048790	8.02645	2.64564	1.0585	2.49944	0.0124391	0.0948253	OE9A048790	ID=OE9A048790T1;Parent=OE9A048790;Name=OE9A048790T1;product=OE9A048790P1;Description=cyclic nucleotide-gated ion channel 8;Ontology_term=GO:0005249%2C GO:0005515%2C GO:0008076%2C GO:0042391%2C GO:0071805
OE9A087215	56.1352	2.64223	0.98298	2.68798	0.00718852	0.0652898	OE9A087215	ID=OE9A087215T1;Parent=OE9A087215;Name=OE9A087215T1;product=OE9A087215P1;Description=Alpha-farnesene synthase;Ontology_term=GO:0000287%2C GO:0008152%2C GO:0010333
OE9A118920	62.436	2.64204	0.888895	2.97228	0.00295597	0.0344313	OE9A118920	ID=OE9A118920T1;Parent=OE9A118920;Name=OE9A118920T1;product=OE9A118920P1;Description=tubulin alpha chain;Ontology_term=GO:0003924%2C GO:0005200%2C GO:0005525%2C GO:0005737%2C GO:0005874%2C GO:0007017
OE9A014162	82.8754	2.63731	0.906481	2.9094	0.00362129	0.0399666	OE9A014162	ID=OE9A014162T1;Parent=OE9A014162;Name=OE9A014162T1;product=OE9A014162P1
OE9A014487	5.1934	2.63661	0.777693	3.3903	0.000698171	0.0116282	OE9A014487	ID=OE9A014487T1;Parent=OE9A014487;Name=OE9A014487T1;product=OE9A014487P1
OE9A111628	18.7085	2.62505	0.525503	4.99532	5.87392e-07	2.80559e-05	OE9A111628	ID=OE9A111628T1;Parent=OE9A111628;Name=OE9A111628T1;product=OE9A111628P1;Description=uncharacterized protein LOC111366985;Ontology_term=GO:0016020
OE9A036125	9.91376	2.62029	0.906707	2.8899	0.00385368	0.0419181	OE9A036125	ID=OE9A036125T1;Parent=OE9A036125;Name=OE9A036125T1;product=OE9A036125P1;Description=ethylene-responsive transcription factor TINY-like;Ontology_term=GO:0003677%2C GO:0003700%2C GO:0005667%2C GO:0006355%2C GO:0045449
OE9A046380	42.3897	2.61576	0.722323	3.62132	0.0002931	0.00578285	OE9A046380	ID=OE9A046380T1;Parent=OE9A046380;Name=OE9A046380T1;product=OE9A046380P1;Description=cytochrome P450 71A6-like;Ontology_term=GO:0005506%2C GO:0016705%2C GO:0020037%2C GO:0055114
OE9A084426	9.49987	2.60806	0.683775	3.8142	0.000136624	0.00312323	OE9A084426	ID=OE9A084426T1;Parent=OE9A084426;Name=OE9A084426T1;product=OE9A084426P1;Description=serine carboxypeptidase-like 50;Ontology_term=GO:0004185%2C GO:0006508
OE9A106169	117.276	2.60505	0.889169	2.92976	0.00339223	0.0381443	OE9A106169	ID=OE9A106169T1;Parent=OE9A106169;Name=OE9A106169T1;product=OE9A106169P1;Description=vetispiradiene synthase 2-like;Ontology_term=GO:0000287%2C GO:0008152%2C GO:0010333
OE9A023324	321.16	2.60199	0.771763	3.37149	0.000747615	0.0122606	OE9A023324	ID=OE9A023324T1;Parent=OE9A023324;Name=OE9A023324T1;product=OE9A023324P1;Description=vetispiradiene synthase 2-like;Ontology_term=GO:0000287%2C GO:0008152%2C GO:0010333
OE9mt000033	8.61777	2.59578	0.846323	3.06713	0.00216127	0.0274841	OE9mt000033	ID=OE9mt000033T1;Parent=OE9mt000033;product=OE9mt000033P1;Description=mttB;Name=OE9mt000033T1
OE9A007781	169.146	2.59532	0.775953	3.34468	0.000823774	0.0132387	OE9A007781	ID=OE9A007781T1;Parent=OE9A007781;Name=OE9A007781T1;product=OE9A007781P1;Description=blue copper -like;Ontology_term=GO:0006118%2C GO:0009055
OE9A065231	79.7609	2.58842	0.46226	5.59948	2.14994e-08	1.41033e-06	OE9A065231	ID=OE9A065231T1;Parent=OE9A065231;Name=OE9A065231T1;product=OE9A065231P1;Description=(-)-germacrene D synthase-like;Ontology_term=GO:0000287%2C GO:0010333
OE9A099659	71.2425	2.58604	0.632929	4.08584	4.39178e-05	0.00120219	OE9A099659	ID=OE9A099659T1;Parent=OE9A099659;Name=OE9A099659T1;product=OE9A099659P1;Description=premnaspirodiene oxygenase-like;Ontology_term=GO:0004497%2C GO:0005506%2C GO:0016021%2C GO:0016705%2C GO:0020037%2C GO:0055114
OE9A070723	12.3209	2.58085	0.712847	3.62048	0.000294059	0.00578555	OE9A070723	ID=OE9A070723T1;Parent=OE9A070723;Name=OE9A070723T1;product=OE9A070723P1;Description=homeobox-leucine zipper HDG11;Ontology_term=GO:0005634%2C GO:0006355%2C GO:0008289%2C GO:0043565
OE9A055031	11.9694	2.58002	0.826066	3.12326	0.00178858	0.0239058	OE9A055031	ID=OE9A055031T1;Parent=OE9A055031;Name=OE9A055031T1;product=OE9A055031P1;Description=heat stress transcription factor A-7a-like;Ontology_term=GO:0003700%2C GO:0005634%2C GO:0005667%2C GO:0006355%2C GO:0043565%2C GO:0045449
OE9A010385	7.5681	2.57839	0.843743	3.05589	0.0022439	0.0281851	OE9A010385	ID=OE9A010385T1;Parent=OE9A010385;Name=OE9A010385T1;product=OE9A010385P1;Description=O-glucosyltransferase 1-like;Ontology_term=GO:0006664%2C GO:0012505%2C GO:0016020%2C GO:0046527
OE9A105698	58.2166	2.57804	0.706766	3.64766	0.000264641	0.00529468	OE9A105698	ID=OE9A105698T1;Parent=OE9A105698;Name=OE9A105698T1;product=OE9A105698P1;Description=cytochrome P450 81E8-like;Ontology_term=GO:0005506%2C GO:0016021%2C GO:0016709%2C GO:0020037%2C GO:0042343%2C GO:0044550%2C GO:0055114%2C GO:0098542
OE9A100739	7.35413	2.5759	1.00816	2.55504	0.0106175	0.0853695	OE9A100739	ID=OE9A100739T1;Parent=OE9A100739;Name=OE9A100739T1;product=OE9A100739P1;Description=calmodulin-binding 60 A-like isoform X1;Ontology_term=GO:0005516%2C GO:0006950
OE9A010919	4.38356	2.57282	0.957417	2.68725	0.00720438	0.0654107	OE9A010919	ID=OE9A010919T1;Parent=OE9A010919;Name=OE9A010919T1;product=OE9A010919P1;Description=APO 2, chloroplastic;Ontology_term=GO:0003723
OE9A099036	6.59694	2.56533	0.952064	2.6945	0.00704946	0.0645316	OE9A099036	ID=OE9A099036T1;Parent=OE9A099036;Name=OE9A099036T1;product=OE9A099036P1;Description=(+)-neomenthol dehydrogenase-like;Ontology_term=GO:0016491%2C GO:0055114
OE9A023913	88.1088	2.55147	0.399426	6.38785	1.68236e-10	1.6345e-08	OE9A023913	ID=OE9A023913T1;Parent=OE9A023913;Name=OE9A023913T1;product=OE9A023913P1;Description=ankyrin repeat-containing BDA1-like;Ontology_term=GO:0005515%2C GO:0016020
OE9A052474	42.2151	2.55039	0.812072	3.1406	0.00168601	0.0228806	OE9A052474	ID=OE9A052474T1;Parent=OE9A052474;Name=OE9A052474T1;product=OE9A052474P1;Description=salicylic acid-binding 2-like;Ontology_term=GO:0016787
OE9A076113	15.8674	2.54576	0.734755	3.46477	0.000530679	0.00939363	OE9A076113	ID=OE9A076113T1;Parent=OE9A076113;Name=OE9A076113T1;product=OE9A076113P1;Description=probable carboxylesterase 18;Ontology_term=GO:0008152%2C GO:0016787
OE9A101017	224.881	2.54425	0.673917	3.77531	0.000159806	0.0035093	OE9A101017	ID=OE9A101017T1;Parent=OE9A101017;Name=OE9A101017T1;product=OE9A101017P1;Description=receptor kinase HAIKU2;Ontology_term=GO:0004674%2C GO:0005515%2C GO:0005524%2C GO:0006468%2C GO:0009069%2C GO:0016021
OE9A028685	99.388	2.53978	0.759102	3.34577	0.000820538	0.0132032	OE9A028685	ID=OE9A028685T1;Parent=OE9A028685;Name=OE9A028685T1;product=OE9A028685P1;Description=aquaporin NIP1-1-like;Ontology_term=GO:0005887%2C GO:0006833%2C GO:0009992%2C GO:0015250%2C GO:0015254%2C GO:0015793%2C GO:0034220
OE9A094691	778.011	2.5363	0.681008	3.72434	0.000195829	0.00415108	OE9A094691	ID=OE9A094691T1;Parent=OE9A094691;Name=OE9A094691T1;product=OE9A094691P1;Description=premnaspirodiene oxygenase-like;Ontology_term=GO:0005506%2C GO:0016020%2C GO:0016705%2C GO:0020037%2C GO:0055114
OE9A058408	6.57326	2.52944	0.883907	2.86166	0.0042143	0.044806	OE9A058408	ID=OE9A058408T1;Parent=OE9A058408;Name=OE9A058408T1;product=OE9A058408P1
OE9A106535	14.3364	2.52613	0.671129	3.76401	0.000167213	0.00364078	OE9A106535	ID=OE9A106535T1;Parent=OE9A106535;Name=OE9A106535T1;product=OE9A106535P1;Description=U-box domain-containing 13-like;Ontology_term=GO:0004842%2C GO:0005515%2C GO:0016567
OE9A066301	385.6	2.5214	0.714358	3.5296	0.000416185	0.00772972	OE9A066301	ID=OE9A066301T1;Parent=OE9A066301;Name=OE9A066301T1;product=OE9A066301P1;Description=premnaspirodiene oxygenase-like;Ontology_term=GO:0004497%2C GO:0005506%2C GO:0016021%2C GO:0016705%2C GO:0020037%2C GO:0055114
OE9A106041	122.849	2.51512	0.324239	7.757	8.69636e-15	1.93959e-12	OE9A106041	ID=OE9A106041T1;Parent=OE9A106041;Name=OE9A106041T1;product=OE9A106041P1;Description=beta-glucosidase 44-like;Ontology_term=GO:0005975%2C GO:0008422%2C GO:1901657
OE9A055395	180.252	2.50902	0.389136	6.44766	1.13587e-10	1.13805e-08	OE9A055395	ID=OE9A055395T1;Parent=OE9A055395;Name=OE9A055395T1;product=OE9A055395P1;Description=endoglucanase 12;Ontology_term=GO:0005982%2C GO:0005985%2C GO:0008810%2C GO:0016021%2C GO:0030245
OE9A076731	21.5465	2.50489	0.810287	3.09136	0.00199241	0.0260201	OE9A076731	ID=OE9A076731T1;Parent=OE9A076731;Name=OE9A076731T1;product=OE9A076731P1;Description=uncharacterized protein LOC111402120 isoform X1;Ontology_term=GO:0016021
OE9A097078	11.3142	2.495	0.843226	2.95887	0.00308768	0.0354503	OE9A097078	ID=OE9A097078T1;Parent=OE9A097078;Name=OE9A097078T1;product=OE9A097078P1
OE9A109237	22.0709	2.49454	0.886278	2.81462	0.0048835	0.0498435	OE9A109237	ID=OE9A109237T1;Parent=OE9A109237;Name=OE9A109237T1;product=OE9A109237P1;Description=disease resistance response 206-like;Ontology_term=GO:0009699%2C GO:0042349%2C GO:0050790
OE9A115044	1840.43	2.49419	0.304882	8.18085	2.81839e-16	8.7095e-14	OE9A115044	ID=OE9A115044T1;Parent=OE9A115044;Name=OE9A115044T1;product=OE9A115044P1;Description=ankyrin repeat-containing BDA1-like;Ontology_term=GO:0005515%2C GO:0016020
OE9A027190	69.4818	2.49365	0.381796	6.53137	6.51721e-11	6.76761e-09	OE9A027190	ID=OE9A027190T1;Parent=OE9A027190;Name=OE9A027190T1;product=OE9A027190P1;Description=RADIALIS-like 3;Ontology_term=GO:0003677%2C GO:0005634
OE9A103435	151.674	2.49035	0.778055	3.20074	0.00137076	0.0195543	OE9A103435	ID=OE9A103435T1;Parent=OE9A103435;Name=OE9A103435T1;product=OE9A103435P1;Description=myb-related Myb4-like;Ontology_term=GO:0003677
OE9A074364	7.6054	2.48683	0.887503	2.80205	0.00507784	0.0513976	OE9A074364	ID=OE9A074364T1;Parent=OE9A074364;Name=OE9A074364T1;product=OE9A074364P1
OE9A022660	18.3613	2.47758	0.920638	2.69115	0.00712055	0.0650178	OE9A022660	ID=OE9A022660T1;Parent=OE9A022660;Name=OE9A022660T1;product=OE9A022660P1;Description=Alpha-farnesene synthase;Ontology_term=GO:0000287%2C GO:0008152%2C GO:0010333
OE9A117209	12.6504	2.47544	0.88174	2.80745	0.00499355	0.0507648	OE9A117209	ID=OE9A117209T1;Parent=OE9A117209;Name=OE9A117209T1;product=OE9A117209P1
OE9A066825	47.412	2.47424	0.903616	2.73815	0.0061786	0.058847	OE9A066825	ID=OE9A066825T1;Parent=OE9A066825;Name=OE9A066825T1;product=OE9A066825P1;Description=Copal-8-ol diphosphate hydratase;Ontology_term=GO:0000287%2C GO:0008152%2C GO:0010333%2C GO:0016853
OE9A059852	7.17116	2.46877	0.910635	2.71104	0.00670718	0.0622404	OE9A059852	ID=OE9A059852T1;Parent=OE9A059852;Name=OE9A059852T1;product=OE9A059852P1;Description=butyrate-- ligase AAE11, peroxisomal-like;Ontology_term=GO:0008152%2C GO:0016874
OE9A053892	63.2059	2.46767	0.986691	2.50096	0.0123859	0.0945773	OE9A053892	ID=OE9A053892T1;Parent=OE9A053892;Name=OE9A053892T1;product=OE9A053892P1;Description=cytochrome P450 71A6-like;Ontology_term=GO:0005506%2C GO:0016705%2C GO:0020037%2C GO:0055114
OE9A005349	151.99	2.46623	0.422461	5.83778	5.28997e-09	3.79001e-07	OE9A005349	ID=OE9A005349T1;Parent=OE9A005349;Name=OE9A005349T1;product=OE9A005349P1;Description=lysine histidine transporter 1-like;Ontology_term=GO:0016021
OE9A103591	1675.08	2.46622	0.696356	3.5416	0.000397701	0.00743486	OE9A103591	ID=OE9A103591T1;Parent=OE9A103591;Name=OE9A103591T1;product=OE9A103591P1;Description=Copper chaperone;Ontology_term=GO:0030001%2C GO:0046872
OE9A104211	12.2254	2.45799	0.772976	3.17991	0.00147323	0.0205699	OE9A104211	ID=OE9A104211T1;Parent=OE9A104211;Name=OE9A104211T1;product=OE9A104211P1
OE9A012806	147.457	2.45778	0.383741	6.40479	1.50573e-10	1.47971e-08	OE9A012806	ID=OE9A012806T1;Parent=OE9A012806;Name=OE9A012806T1;product=OE9A012806P1;Description=thaumatin;Ontology_term=GO:0005515%2C GO:0005576%2C GO:0031640%2C GO:0050832
OE9A008704	11.2925	2.44735	0.771098	3.17385	0.00150434	0.0208792	OE9A008704	ID=OE9A008704T1;Parent=OE9A008704;Name=OE9A008704T1;product=OE9A008704P1
OE9A114451	197.052	2.44654	0.5369	4.55678	5.19444e-06	0.000195069	OE9A114451	ID=OE9A114451T1;Parent=OE9A114451;Name=OE9A114451T1;product=OE9A114451P1;Description=probable receptor kinase At1g67000;Ontology_term=GO:0004672%2C GO:0005524%2C GO:0006468%2C GO:0030247
OE9A095668	297.138	2.4363	0.838026	2.90719	0.00364697	0.0401637	OE9A095668	ID=OE9A095668T1;Parent=OE9A095668;Name=OE9A095668T1;product=OE9A095668P1;Description=premnaspirodiene oxygenase-like;Ontology_term=GO:0004497%2C GO:0005506%2C GO:0016021%2C GO:0016705%2C GO:0020037%2C GO:0055114
OE9A011434	8.21493	2.43628	0.872111	2.79354	0.00521341	0.0523361	OE9A011434	ID=OE9A011434T1;Parent=OE9A011434;Name=OE9A011434T1;product=OE9A011434P1;Description=NUCLEAR FUSION DEFECTIVE 4-like;Ontology_term=GO:0016021
OE9A048887	6.77488	2.43522	0.798988	3.04788	0.00230464	0.028681	OE9A048887	ID=OE9A048887T1;Parent=OE9A048887;Name=OE9A048887T1;product=OE9A048887P1;Description=DEAD-box ATP-dependent RNA helicase 5;Ontology_term=GO:0003676%2C GO:0004386%2C GO:0005524
OE9A000556	20.933	2.42755	0.763292	3.18038	0.00147084	0.0205477	OE9A000556	ID=OE9A000556T1;Parent=OE9A000556;Name=OE9A000556T1;product=OE9A000556P1;Description=LEAF RUST 10 DISEASE-RESISTANCE LOCUS RECEPTOR-LIKE PROTEIN KINASE-like;Ontology_term=GO:0030247
OE9A079697	6.52754	2.41772	0.945918	2.55595	0.0105898	0.0852538	OE9A079697	ID=OE9A079697T1;Parent=OE9A079697;Name=OE9A079697T1;product=OE9A079697P1;Description=DOWNY MILDEW RESISTANCE 6-like;Ontology_term=GO:0046872%2C GO:0051213%2C GO:0055114
OE9A027483	42.3043	2.41257	0.613695	3.93122	8.45168e-05	0.00208439	OE9A027483	ID=OE9A027483T1;Parent=OE9A027483;Name=OE9A027483T1;product=OE9A027483P1;Description=rust resistance kinase Lr10-like;Ontology_term=GO:0004672%2C GO:0005524%2C GO:0006468
OE9A050819	192.297	2.40611	0.3907	6.15846	7.34538e-10	6.3865e-08	OE9A050819	ID=OE9A050819T1;Parent=OE9A050819;Name=OE9A050819T1;product=OE9A050819P1;Description=high-affinity nitrate transporter -like;Ontology_term=GO:0010167%2C GO:0015706%2C GO:0016021
OE9A013383	20.3873	2.40189	0.610118	3.93676	8.25878e-05	0.00204075	OE9A013383	ID=OE9A013383T1;Parent=OE9A013383;Name=OE9A013383T1;product=OE9A013383P1;Description=LRR receptor-like serine threonine- kinase GSO1;Ontology_term=GO:0005515
OE9A032110	760.531	2.38699	0.39775	6.00123	1.95831e-09	1.54731e-07	OE9A032110	ID=OE9A032110T1;Parent=OE9A032110;Name=OE9A032110T1;product=OE9A032110P1;Description=major allergen Pru ar 1-like;Ontology_term=GO:0004864%2C GO:0004872%2C GO:0005634%2C GO:0005737%2C GO:0006952%2C GO:0009607%2C GO:0009738%2C GO:0010427%2C GO:0043086%2C GO:0080163
OE9A069837	13.2915	2.38435	0.598983	3.98066	6.87238e-05	0.00175044	OE9A069837	ID=OE9A069837T1;Parent=OE9A069837;Name=OE9A069837T1;product=OE9A069837P1
OE9A040680	296.568	2.37846	0.452483	5.25647	1.46847e-07	8.06527e-06	OE9A040680	ID=OE9A040680T1;Parent=OE9A040680;Name=OE9A040680T1;product=OE9A040680P1;Description=salicylic acid-binding 2-like;Ontology_term=GO:0016787
OE9A009627	26.2318	2.37752	0.59827	3.97398	7.06803e-05	0.00179493	OE9A009627	ID=OE9A009627T1;Parent=OE9A009627;Name=OE9A009627T1;product=OE9A009627P1;Description=beta-amyrin 28-oxidase-like;Ontology_term=GO:0004497%2C GO:0005506%2C GO:0016021%2C GO:0016705%2C GO:0020037%2C GO:0055114
OE9A017590	4.84972	2.37749	0.886206	2.68277	0.00730148	0.0660351	OE9A017590	ID=OE9A017590T1;Parent=OE9A017590;Name=OE9A017590T1;product=OE9A017590P1;Description=probable F-box At1g60180;Ontology_term=GO:0016020
OE9A117747	9.96053	2.37721	0.766175	3.1027	0.00191765	0.0252236	OE9A117747	ID=OE9A117747T1;Parent=OE9A117747;Name=OE9A117747T1;product=OE9A117747P1;Description=probable methyltransferase PMT15;Ontology_term=GO:0008168%2C GO:0016021%2C GO:0032259
OE9A105690	11.5591	2.37358	0.731073	3.2467	0.0011675	0.0173999	OE9A105690	ID=OE9A105690T1;Parent=OE9A105690;Name=OE9A105690T1;product=OE9A105690P1;Description=GDSL esterase lipase At5g45910;Ontology_term=GO:0016788
OE9A047600	40.7953	2.37056	0.446841	5.30515	1.12583e-07	6.29116e-06	OE9A047600	ID=OE9A047600T1;Parent=OE9A047600;Name=OE9A047600T1;product=OE9A047600P1;Description=xyloglucan galactosyltransferase XLT2-like;Ontology_term=GO:0016021%2C GO:0016757
OE9A119630	1700.49	2.36566	0.583952	4.05112	5.09727e-05	0.00136329	OE9A119630	ID=OE9A119630T1;Parent=OE9A119630;Name=OE9A119630T1;product=OE9A119630P1;Description=Copper chaperone;Ontology_term=GO:0046872
OE9A039171	89.0479	2.35919	0.447726	5.26928	1.36963e-07	7.56974e-06	OE9A039171	ID=OE9A039171T1;Parent=OE9A039171;Name=OE9A039171T1;product=OE9A039171P1;Description=(-)-germacrene D synthase;Ontology_term=GO:0000287%2C GO:0008152%2C GO:0010333
OE9A037305	124.385	2.35583	0.31002	7.59895	2.98549e-14	5.67221e-12	OE9A037305	ID=OE9A037305T1;Parent=OE9A037305;Name=OE9A037305T1;product=OE9A037305P1;Description=receptor kinase At3g47110;Ontology_term=GO:0004672%2C GO:0005515%2C GO:0005524%2C GO:0006468
OE9A006711	11.6897	2.35484	0.903453	2.60649	0.00914753	0.0772047	OE9A006711	ID=OE9A006711T1;Parent=OE9A006711;Name=OE9A006711T1;product=OE9A006711P1;Description=zinc finger 8-like;Ontology_term=GO:0046872
OE9A010840	136.436	2.3546	0.325765	7.22791	4.90472e-13	7.31402e-11	OE9A010840	ID=OE9A010840T1;Parent=OE9A010840;Name=OE9A010840T1;product=OE9A010840P1;Description=calcium-transporting ATPase 12, plasma membrane-type-like;Ontology_term=GO:0000166%2C GO:0006810%2C GO:0016021%2C GO:0046872
OE9A101219	430.518	2.33486	0.388604	6.00832	1.87453e-09	1.48854e-07	OE9A101219	ID=OE9A101219T1;Parent=OE9A101219;Name=OE9A101219T1;product=OE9A101219P1;Description=major allergen Pru ar 1-like;Ontology_term=GO:0006952%2C GO:0009607
OE9A014291	2100.1	2.32514	0.230061	10.1066	5.16247e-24	9.45802e-21	OE9A014291	ID=OE9A014291T1;Parent=OE9A014291;Name=OE9A014291T1;product=OE9A014291P1;Description=LRR receptor-like serine threonine- kinase GSO1;Ontology_term=GO:0005515
OE9A030919	5.99163	2.3171	0.835205	2.77429	0.00553224	0.0545966	OE9A030919	ID=OE9A030919T1;Parent=OE9A030919;Name=OE9A030919T1;product=OE9A030919P1
OE9A091680	9.11765	2.3145	0.912244	2.53715	0.011176	0.0882374	OE9A091680	ID=OE9A091680T1;Parent=OE9A091680;Name=OE9A091680T1;product=OE9A091680P1;Description=receptor kinase At5g39000;Ontology_term=GO:0004672%2C GO:0005524%2C GO:0006468%2C GO:0016020
OE9A031175	29.3819	2.31207	0.757763	3.05118	0.00227945	0.0284504	OE9A031175	ID=OE9A031175T1;Parent=OE9A031175;Name=OE9A031175T1;product=OE9A031175P1;Description=probable WRKY transcription factor 31;Ontology_term=GO:0003700%2C GO:0005667%2C GO:0006355%2C GO:0043565%2C GO:0045449
OE9A092293	9.49383	2.30961	0.84963	2.71837	0.0065604	0.0612774	OE9A092293	ID=OE9A092293T1;Parent=OE9A092293;Name=OE9A092293T1;product=OE9A092293P1;Description=cytosolic sulfotransferase 5-like;Ontology_term=GO:0008146
OE9A101761	15.7383	2.30879	0.840496	2.74694	0.00601535	0.0578941	OE9A101761	ID=OE9A101761T1;Parent=OE9A101761;Name=OE9A101761T1;product=OE9A101761P1;Description=O-fucosyltransferase 8 isoform X1;Ontology_term=GO:0016021
OE9A088243	9.15638	2.30774	0.842002	2.74078	0.00612937	0.0585739	OE9A088243	ID=OE9A088243T1;Parent=OE9A088243;Name=OE9A088243T1;product=OE9A088243P1;Description=ankyrin repeat-containing ITN1-like isoform X1;Ontology_term=GO:0016021
OE9A073769	18.8632	2.30656	0.517944	4.45331	8.45578e-06	0.000301225	OE9A073769	ID=OE9A073769T1;Parent=OE9A073769;Name=OE9A073769T1;product=OE9A073769P1;Description=Two-component response regulator ARR9;Ontology_term=GO:0000160%2C GO:0005622
OE9A051077	7.53657	2.30604	0.671213	3.43563	0.000591184	0.0102041	OE9A051077	ID=OE9A051077T1;Parent=OE9A051077;Name=OE9A051077T1;product=OE9A051077P1;Description=probable 1-acyl-sn-glycerol-3-phosphate acyltransferase 4;Ontology_term=GO:0008152%2C GO:0016021%2C GO:0016746
OE9A015988	329.551	2.30403	0.750905	3.06834	0.00215249	0.0274127	OE9A015988	ID=OE9A015988T1;Parent=OE9A015988;Name=OE9A015988T1;product=OE9A015988P1;Description=mitochondrial phosphate carrier 3, mitochondrial-like;Ontology_term=GO:0006810%2C GO:0016021
OE9A119813	17.3021	2.30059	0.65207	3.52813	0.000418513	0.00775805	OE9A119813	ID=OE9A119813T1;Parent=OE9A119813;Name=OE9A119813T1;product=OE9A119813P1
OE9A022053	268.223	2.29803	0.58127	3.95346	7.70282e-05	0.00192476	OE9A022053	ID=OE9A022053T1;Parent=OE9A022053;Name=OE9A022053T1;product=OE9A022053P1;Description=LEAF RUST 10 DISEASE-RESISTANCE LOCUS RECEPTOR-LIKE PROTEIN KINASE-like;Ontology_term=GO:0004672%2C GO:0005524%2C GO:0006468%2C GO:0030247
OE9A036166	10.1425	2.2971	0.728605	3.15274	0.00161744	0.022173	OE9A036166	ID=OE9A036166T1;Parent=OE9A036166;Name=OE9A036166T1;product=OE9A036166P1
OE9A067286	184.387	2.29507	0.660027	3.47723	0.000506623	0.00904271	OE9A067286	ID=OE9A067286T1;Parent=OE9A067286;Name=OE9A067286T1;product=OE9A067286P1
OE9A052507	368.356	2.28043	0.386411	5.90156	3.60072e-09	2.70835e-07	OE9A052507	ID=OE9A052507T1;Parent=OE9A052507;Name=OE9A052507T1;product=OE9A052507P1
OE9A023640	79.5296	2.27692	0.668401	3.40652	0.000657958	0.0111026	OE9A023640	ID=OE9A023640T1;Parent=OE9A023640;Name=OE9A023640T1;product=OE9A023640P1;Description=premnaspirodiene oxygenase-like;Ontology_term=GO:0004497%2C GO:0005506%2C GO:0016021%2C GO:0016705%2C GO:0020037%2C GO:0055114
OE9A044252	52.6085	2.27546	0.473252	4.80814	1.52344e-06	6.66804e-05	OE9A044252	ID=OE9A044252T1;Parent=OE9A044252;Name=OE9A044252T1;product=OE9A044252P1
OE9A022054	616.159	2.27311	0.296794	7.65888	1.87561e-14	3.75841e-12	OE9A022054	ID=OE9A022054T1;Parent=OE9A022054;Name=OE9A022054T1;product=OE9A022054P1
OE9A012316	169.532	2.27175	0.403739	5.62678	1.83602e-08	1.21685e-06	OE9A012316	ID=OE9A012316T1;Parent=OE9A012316;Name=OE9A012316T1;product=OE9A012316P1;Description=random slug 5-like;Ontology_term=GO:0005215%2C GO:0005622%2C GO:0006810
OE9A121970	47.5475	2.27118	0.699182	3.24834	0.00116081	0.0173405	OE9A121970	ID=OE9A121970T1;Parent=OE9A121970;Name=OE9A121970T1;product=OE9A121970P1;Description=E3 ubiquitin- ligase PUB24-like;Ontology_term=GO:0004842%2C GO:0005488%2C GO:0016567
OE9A082849	12.6683	2.27096	0.908587	2.49944	0.0124389	0.0948253	OE9A082849	ID=OE9A082849T1;Parent=OE9A082849;Name=OE9A082849T1;product=OE9A082849P1;Description=gamma-glutamyl peptidase 5-like;Ontology_term=GO:0005829%2C GO:0006508%2C GO:0006541%2C GO:0008233%2C GO:0016740%2C GO:0019760
OE9A104106	194.133	2.2707	0.406583	5.58483	2.33926e-08	1.51898e-06	OE9A104106	ID=OE9A104106T1;Parent=OE9A104106;Name=OE9A104106T1;product=OE9A104106P1
OE9A076943	215.808	2.27043	0.26817	8.46637	2.53169e-17	9.14582e-15	OE9A076943	ID=OE9A076943T1;Parent=OE9A076943;Name=OE9A076943T1;product=OE9A076943P1;Description=primary amine oxidase-like;Ontology_term=GO:0005507%2C GO:0008131%2C GO:0009308%2C GO:0016021%2C GO:0048038%2C GO:0055114
OE9A066957	2372.52	2.26418	0.32745	6.91457	4.69291e-12	6.04866e-10	OE9A066957	ID=OE9A066957T1;Parent=OE9A066957;Name=OE9A066957T1;product=OE9A066957P1;Description=glucan endo-1,3-beta-glucosidase, acidic-like;Ontology_term=GO:0004553%2C GO:0005975
OE9A059461	21.8272	2.2637	0.550583	4.11146	3.93167e-05	0.00110574	OE9A059461	ID=OE9A059461T1;Parent=OE9A059461;Name=OE9A059461T1;product=OE9A059461P1;Description=glyoxylate hydroxypyruvate reductase HPR3-like;Ontology_term=GO:0016616%2C GO:0051287%2C GO:0055114
OE9A038638	4.70923	2.26041	0.85305	2.6498	0.00805385	0.070254	OE9A038638	ID=OE9A038638T1;Parent=OE9A038638;Name=OE9A038638T1;product=OE9A038638P1
OE9A108606	247.263	2.24404	0.374552	5.99127	2.08205e-09	1.6331e-07	OE9A108606	ID=OE9A108606T1;Parent=OE9A108606;Name=OE9A108606T1;product=OE9A108606P1;Description=trans-cinnamate 4-monooxygenase;Ontology_term=GO:0005506%2C GO:0006558%2C GO:0009805%2C GO:0009809%2C GO:0009811%2C GO:0016021%2C GO:0016710%2C GO:0020037%2C GO:0055114
OE9A110943	178.085	2.242	0.663961	3.37671	0.000733579	0.0120767	OE9A110943	ID=OE9A110943T1;Parent=OE9A110943;Name=OE9A110943T1;product=OE9A110943P1;md5=a56ca71f62a968d2cd24d750cec7593b;INTERPRO=<table><tr><th>DB</th><th>ID</th><th>Description</th></tr><tr><td>Coils</td><td>Coil</td><td></td></tr><tr><td>Gene3D</td><td>G3DSA:1.10.600.10</td><td></td></tr><tr><td>Gene3D</td><td>G3DSA:1.50.30.10</td><td></td></tr><tr><td>PANTHER</td><td>PTHR31225</td><td></td></tr><tr><td>…
OE9A081693	4.59652	2.24147	0.891976	2.51293	0.0119734	0.0923071	OE9A081693	ID=OE9A081693T1;Parent=OE9A081693;Name=OE9A081693T1;product=OE9A081693P1;Description=AP2-like ethylene-responsive transcription factor At1g79700;Ontology_term=GO:0003677%2C GO:0003700%2C GO:0005667%2C GO:0006355%2C GO:0045449
OE9A054066	44.8553	2.23903	0.821361	2.726	0.00641078	0.0603484	OE9A054066	ID=OE9A054066T1;Parent=OE9A054066;Name=OE9A054066T1;product=OE9A054066P1;Description=tubulin alpha chain;Ontology_term=GO:0003924%2C GO:0005200%2C GO:0005525%2C GO:0005737%2C GO:0005874%2C GO:0007017
OE9A063358	172.133	2.23287	0.288078	7.75093	9.12201e-15	2.01699e-12	OE9A063358	ID=OE9A063358T1;Parent=OE9A063358;Name=OE9A063358T1;product=OE9A063358P1;Description=tryptophan aminotransferase-related 4-like;Ontology_term=GO:0016846
OE9A011526	241.461	2.23277	0.290096	7.69665	1.39677e-14	2.91266e-12	OE9A011526	ID=OE9A011526T1;Parent=OE9A011526;Name=OE9A011526T1;product=OE9A011526P1;md5=20e3fcbf6e9e9667491023d22a13818e;INTERPRO=<table><tr><th>DB</th><th>ID</th><th>Description</th></tr><tr><td>Gene3D</td><td>G3DSA:3.20.20.190</td><td></td></tr><tr><td>PANTHER</td><td>PTHR23344</td><td></td></tr><tr><td>PANTHER</td><td>PTHR23344:SF8</td><td></td></tr><tr><td>Pfam</td><td>PF03009</td><td>Glycerophosphoryl …
OE9A008314	133.6	2.22922	0.561366	3.97107	7.15515e-05	0.0018081	OE9A008314	ID=OE9A008314T1;Parent=OE9A008314;Name=OE9A008314T1;product=OE9A008314P1;Description=disease resistance response 206-like;Ontology_term=GO:0009699%2C GO:0042349%2C GO:0050790
OE9A034701	154.867	2.22581	0.755269	2.94705	0.00320822	0.0365885	OE9A034701	ID=OE9A034701T1;Parent=OE9A034701;Name=OE9A034701T1;product=OE9A034701P1;Description=ferruginol synthase-like;Ontology_term=GO:0005506%2C GO:0016020%2C GO:0016705%2C GO:0020037%2C GO:0055114
OE9A104208	12.8036	2.22447	0.662174	3.35934	0.000781294	0.0126352	OE9A104208	ID=OE9A104208T1;Parent=OE9A104208;Name=OE9A104208T1;product=OE9A104208P1;Description=heat shock cognate 80;Ontology_term=GO:0005524%2C GO:0006457%2C GO:0006950%2C GO:0051082
OE9A116782	104.33	2.22379	0.811174	2.74144	0.00611696	0.0585425	OE9A116782	ID=OE9A116782T1;Parent=OE9A116782;Name=OE9A116782T1;product=OE9A116782P1;Description=LEAF RUST 10 DISEASE-RESISTANCE LOCUS RECEPTOR-LIKE PROTEIN KINASE-like isoform X1;Ontology_term=GO:0004672%2C GO:0005524%2C GO:0006468%2C GO:0016020
OE9A074535	4.35958	2.22169	0.8724	2.54664	0.0108765	0.0869342	OE9A074535	ID=OE9A074535T1;Parent=OE9A074535;Name=OE9A074535T1;product=OE9A074535P1;Description=late blight resistance homolog R1A-3;Ontology_term=GO:0043531
OE9A034648	62.3791	2.21658	0.557862	3.97334	7.08712e-05	0.001798	OE9A034648	ID=OE9A034648T1;Parent=OE9A034648;Name=OE9A034648T1;product=OE9A034648P1;Description=cytochrome P450;Ontology_term=GO:0005506%2C GO:0016021%2C GO:0020037%2C GO:0033773%2C GO:0055114
OE9A056229	62.9809	2.21652	0.454804	4.87358	1.09596e-06	4.95001e-05	OE9A056229	ID=OE9A056229T1;Parent=OE9A056229;Name=OE9A056229T1;product=OE9A056229P1;Description=serine threonine- kinase At5g01020-like;Ontology_term=GO:0004672%2C GO:0005524%2C GO:0006468
OE9A051140	4.91596	2.21534	0.87966	2.51841	0.0117887	0.0913774	OE9A051140	ID=OE9A051140T1;Parent=OE9A051140;Name=OE9A051140T1;product=OE9A051140P1;Description=phosphatidylinositol 3,4,5-trisphosphate 3-phosphatase and -tyrosine-phosphatase PTEN2A;Ontology_term=GO:0004725%2C GO:0005515%2C GO:0006570%2C GO:0035335
OE9A119036	174.808	2.21486	0.260143	8.51399	1.68053e-17	6.15769e-15	OE9A119036	ID=OE9A119036T1;Parent=OE9A119036;Name=OE9A119036T1;product=OE9A119036P1;Description=chlorophyll a-b binding 21, chloroplastic-like;Ontology_term=GO:0009522%2C GO:0009535%2C GO:0009765%2C GO:0016021%2C GO:0016168%2C GO:0018298%2C GO:0046872
OE9A041322	25.953	2.20342	0.744247	2.96061	0.00307034	0.0352986	OE9A041322	ID=OE9A041322T1;Parent=OE9A041322;Name=OE9A041322T1;product=OE9A041322P1
OE9A084990	22.9457	2.19548	0.591987	3.70866	0.000208356	0.00437684	OE9A084990	ID=OE9A084990T1;Parent=OE9A084990;Name=OE9A084990T1;product=OE9A084990P1;Description=O-glucosyltransferase 1-like;Ontology_term=GO:0006664%2C GO:0012505%2C GO:0016020%2C GO:0046527
OE9A086934	59.541	2.19429	0.606322	3.61902	0.000295719	0.00581218	OE9A086934	ID=OE9A086934T1;Parent=OE9A086934;Name=OE9A086934T1;product=OE9A086934P1;Description=1-aminocyclopropane-1-carboxylate synthase 3-like;Ontology_term=GO:0006519%2C GO:0008171%2C GO:0016847%2C GO:0030170%2C GO:0042218
OE9A089408	34.5579	2.19292	0.850252	2.57914	0.00990474	0.0812689	OE9A089408	ID=OE9A089408T1;Parent=OE9A089408;Name=OE9A089408T1;product=OE9A089408P1
OE9A006693	399.692	2.19068	0.297554	7.36229	1.80775e-13	3.04055e-11	OE9A006693	ID=OE9A006693T2;Parent=OE9A006693;Name=OE9A006693T2;product=OE9A006693P2;Description=MLO 3;Ontology_term=GO:0005886%2C GO:0006952%2C GO:0016021
OE9A101530	237.536	2.19	0.274853	7.96792	1.61361e-15	4.13875e-13	OE9A101530	ID=OE9A101530T1;Parent=OE9A101530;Name=OE9A101530T1;product=OE9A101530P1;Description=NAC domain-containing 35;Ontology_term=GO:0003677%2C GO:0005634%2C GO:0006355
OE9A003494	293.178	2.17115	0.460409	4.71569	2.40891e-06	0.000101289	OE9A003494	ID=OE9A003494T1;Parent=OE9A003494;Name=OE9A003494T1;product=OE9A003494P1;Description=NRT1 PTR FAMILY -like;Ontology_term=GO:0005215%2C GO:0006810%2C GO:0016021
OE9A089490	6.92217	2.17015	0.77494	2.80041	0.00510375	0.0515379	OE9A089490	ID=OE9A089490T1;Parent=OE9A089490;Name=OE9A089490T1;product=OE9A089490P1;Description=uncharacterized protein LOC111391312;Ontology_term=GO:0005622%2C GO:0008270
OE9A061546	12.9895	2.16947	0.681798	3.18199	0.00146266	0.0204446	OE9A061546	ID=OE9A061546T1;Parent=OE9A061546;Name=OE9A061546T1;product=OE9A061546P1;Description=methyl- -binding domain-containing 2-like;Ontology_term=GO:0000122%2C GO:0005634%2C GO:0006346%2C GO:0008270%2C GO:0008327
OE9A002550	10.7364	2.15906	0.819896	2.63334	0.00845498	0.0728457	OE9A002550	ID=OE9A002550T1;Parent=OE9A002550;Name=OE9A002550T1;product=OE9A002550P1;Description=BEL1-like homeodomain 4;Ontology_term=GO:0003677%2C GO:0006355
OE9A096392	80.7116	2.15815	0.584522	3.69217	0.000222351	0.00459946	OE9A096392	ID=OE9A096392T1;Parent=OE9A096392;Name=OE9A096392T1;product=OE9A096392P1;md5=c0173038f1d98f563015a283ba9fefee;INTERPRO=<table><tr><th>DB</th><th>ID</th><th>Description</th></tr><tr><td>Gene3D</td><td>G3DSA:1.10.600.10</td><td></td></tr><tr><td>PANTHER</td><td>PTHR31225</td><td></td></tr><tr><td>PANTHER</td><td>PTHR31225:SF15</td><td></td></tr><tr><td>SUPERFAMILY</td><td>SSF48576</td><td></td></tr…
OE9A083940	337.794	2.15473	0.490721	4.39095	1.12858e-05	0.000381382	OE9A083940	ID=OE9A083940T1;Parent=OE9A083940;Name=OE9A083940T1;product=OE9A083940P1;Description=cytochrome P450;Ontology_term=GO:0004497%2C GO:0005506%2C GO:0016021%2C GO:0016705%2C GO:0020037%2C GO:0055114
OE9A084435	16.6624	2.14652	0.713423	3.00877	0.00262311	0.0315425	OE9A084435	ID=OE9A084435T1;Parent=OE9A084435;Name=OE9A084435T1;product=OE9A084435P1;Description=(-)-germacrene D synthase;Ontology_term=GO:0000287%2C GO:0008152%2C GO:0010333
OE9A077702	40.8179	2.1413	0.697167	3.07143	0.00213035	0.0272254	OE9A077702	ID=OE9A077702T1;Parent=OE9A077702;Name=OE9A077702T1;product=OE9A077702P1;Description=12-oxophytodienoate reductase 11;Ontology_term=GO:0010181%2C GO:0016491%2C GO:0055114
OE9A039626	16.7384	2.13926	0.631646	3.38681	0.000707111	0.0117314	OE9A039626	ID=OE9A039626T1;Parent=OE9A039626;Name=OE9A039626T1;product=OE9A039626P1;Description=probable transcription factor At1g61730;Ontology_term=GO:0006355
OE9A090808	22.0984	2.13801	0.735919	2.90522	0.00366991	0.040347	OE9A090808	ID=OE9A090808T1;Parent=OE9A090808;Name=OE9A090808T1;product=OE9A090808P1;Description=L-lactate dehydrogenase B-like;Ontology_term=GO:0004459%2C GO:0005737%2C GO:0006094%2C GO:0006096%2C GO:0006534%2C GO:0055114
OE9A078348	59.1198	2.13278	0.349454	6.10316	1.0399e-09	8.71643e-08	OE9A078348	ID=OE9A078348T1;Parent=OE9A078348;Name=OE9A078348T1;product=OE9A078348P1;Description=strigolactone esterase D14;Ontology_term=GO:0016787
OE9A015141	13.5561	2.13174	0.789693	2.69945	0.00694534	0.0638017	OE9A015141	ID=OE9A015141T1;Parent=OE9A015141;Name=OE9A015141T1;product=OE9A015141P1;Description=fructose-bisphosphate aldolase, cytoplasmic isozyme 1;Ontology_term=GO:0004332%2C GO:0006000%2C GO:0006013%2C GO:0006020%2C GO:0006094%2C GO:0006096%2C GO:0006098%2C GO:0015976
OE9A069970	12.6527	2.13128	0.737719	2.88901	0.0038646	0.0419658	OE9A069970	ID=OE9A069970T1;Parent=OE9A069970;Name=OE9A069970T1;product=OE9A069970P1;Description=nac domain-containing 104;Ontology_term=GO:0003677%2C GO:0005634%2C GO:0006355
OE9A094557	213.889	2.12894	0.24555	8.67009	4.31774e-18	1.9776e-15	OE9A094557	ID=OE9A094557T1;Parent=OE9A094557;Name=OE9A094557T1;product=OE9A094557P1;Description=NAC domain-containing 35;Ontology_term=GO:0003677%2C GO:0005634%2C GO:0006355
OE9A045760	12.7381	2.12317	0.682298	3.1118	0.0018595	0.0246482	OE9A045760	ID=OE9A045760T1;Parent=OE9A045760;Name=OE9A045760T1;product=OE9A045760P1
OE9A103330	61.2772	2.1227	0.648307	3.27422	0.00105954	0.016107	OE9A103330	ID=OE9A103330T1;Parent=OE9A103330;Name=OE9A103330T1;product=OE9A103330P1
OE9A085041	1152.05	2.1153	0.776153	2.72537	0.00642297	0.0604117	OE9A085041	ID=OE9A085041T1;Parent=OE9A085041;Name=OE9A085041T1;product=OE9A085041P1
OE9A085416	170.564	2.11445	0.479441	4.41024	1.03258e-05	0.000355023	OE9A085416	ID=OE9A085416T1;Parent=OE9A085416;Name=OE9A085416T1;product=OE9A085416P1;Description=Serine threonine kinase;Ontology_term=GO:0004672%2C GO:0005524%2C GO:0006468
OE9A103393	252.555	2.11257	0.350365	6.02964	1.64327e-09	1.33381e-07	OE9A103393	ID=OE9A103393T1;Parent=OE9A103393;Name=OE9A103393T1;product=OE9A103393P1;Description=rust resistance kinase Lr10-like;Ontology_term=GO:0004672%2C GO:0005524%2C GO:0006468
OE9A102854	272.435	2.10878	0.633041	3.33119	0.000864759	0.0138022	OE9A102854	ID=OE9A102854T1;Parent=OE9A102854;Name=OE9A102854T1;product=OE9A102854P1;Description=ODORANT1-like;Ontology_term=GO:0003677
OE9A098873	1174.16	2.10823	0.777059	2.71309	0.00666586	0.061969	OE9A098873	ID=OE9A098873T1;Parent=OE9A098873;Name=OE9A098873T1;product=OE9A098873P1
OE9A054446	597.715	2.10645	0.297735	7.07493	1.49524e-12	2.08431e-10	OE9A054446	ID=OE9A054446T1;Parent=OE9A054446;Name=OE9A054446T1;product=OE9A054446P1;Description=zinc finger CONSTANS-LIKE 16-like;Ontology_term=GO:0005515%2C GO:0005622%2C GO:0008270
OE9A086810	12.191	2.10321	0.815418	2.5793	0.00989996	0.0812557	OE9A086810	ID=OE9A086810T1;Parent=OE9A086810;Name=OE9A086810T1;product=OE9A086810P1;Description=receptor 12;Ontology_term=GO:0005515
OE9A071210	9.54422	2.10159	0.763427	2.75283	0.00590822	0.0572065	OE9A071210	ID=OE9A071210T1;Parent=OE9A071210;Name=OE9A071210T1;product=OE9A071210P1;Description=shikimate kinase, chloroplastic;Ontology_term=GO:0000162%2C GO:0000287%2C GO:0004765%2C GO:0005524%2C GO:0006571%2C GO:0009094%2C GO:0009423%2C GO:0009507%2C GO:0016310%2C GO:0019632
OE9A035993	116.618	2.10034	0.559293	3.75534	0.000173104	0.00374444	OE9A035993	ID=OE9A035993T1;Parent=OE9A035993;Name=OE9A035993T1;product=OE9A035993P1;Description=pectinesterase-like;Ontology_term=GO:0005618%2C GO:0005982%2C GO:0005985%2C GO:0030599%2C GO:0042545%2C GO:0043086%2C GO:0045330%2C GO:0045490%2C GO:0046910
OE9A084432	62.1152	2.09857	0.488939	4.29209	1.77e-05	0.000560478	OE9A084432	ID=OE9A084432T1;Parent=OE9A084432;Name=OE9A084432T1;product=OE9A084432P1
OE9A083155	1171.62	2.09514	0.77816	2.69243	0.0070934	0.0647929	OE9A083155	ID=OE9A083155T1;Parent=OE9A083155;Name=OE9A083155T1;product=OE9A083155P1
OE9A047856	847.934	2.09393	0.270784	7.73282	1.05188e-14	2.2672e-12	OE9A047856	ID=OE9A047856T1;Parent=OE9A047856;Name=OE9A047856T1;product=OE9A047856P1;Description=heat shock 83;Ontology_term=GO:0005524%2C GO:0006457%2C GO:0006950%2C GO:0051082
OE9A049424	6.41085	2.09202	0.841853	2.48502	0.0129545	0.0978131	OE9A049424	ID=OE9A049424T1;Parent=OE9A049424;Name=OE9A049424T1;product=OE9A049424P1;Description=allantoate deiminase;Ontology_term=GO:0005783%2C GO:0006145%2C GO:0006508%2C GO:0008237%2C GO:0010136%2C GO:0047652
OE9A055286	26.0439	2.08773	0.63472	3.28921	0.00100469	0.015533	OE9A055286	ID=OE9A055286T1;Parent=OE9A055286;Name=OE9A055286T1;product=OE9A055286P1;Description=glucuronoxylan 4-O-methyltransferase 3-like;Ontology_term=GO:0045492
OE9A073014	11.7636	2.08715	0.7376	2.82964	0.00465998	0.0481175	OE9A073014	ID=OE9A073014T1;Parent=OE9A073014;Name=OE9A073014T1;product=OE9A073014P1;Description=unnamed protein product;Ontology_term=GO:0016021
OE9A095145	21.4327	2.08331	0.52191	3.99169	6.5603e-05	0.00167929	OE9A095145	ID=OE9A095145T1;Parent=OE9A095145;Name=OE9A095145T1;product=OE9A095145P1;Description=autophagy-related 11;Ontology_term=GO:0000045%2C GO:0001934%2C GO:0019901%2C GO:0034045%2C GO:1990316
OE9A033455	16.2241	2.0741	0.819622	2.53055	0.0113882	0.0892731	OE9A033455	ID=OE9A033455T1;Parent=OE9A033455;Name=OE9A033455T1;product=OE9A033455P1;Description=RADIALIS-like 3;Ontology_term=GO:0003677%2C GO:0005634
OE9A102074	9.00972	2.07154	0.780314	2.65476	0.0079365	0.0696056	OE9A102074	ID=OE9A102074T2;Parent=OE9A102074;Name=OE9A102074T2;product=OE9A102074P2;Description=sister chromatid cohesion 1 1;Ontology_term=GO:0000228%2C GO:0005515
OE9A048743	14.8262	2.07107	0.651932	3.17682	0.00148897	0.020722	OE9A048743	ID=OE9A048743T1;Parent=OE9A048743;Name=OE9A048743T1;product=OE9A048743P1;Description=Serine threonine kinase;Ontology_term=GO:0004674%2C GO:0005509%2C GO:0005515%2C GO:0005524%2C GO:0006468%2C GO:0009069%2C GO:0016021%2C GO:0030247
OE9A117156	8.70054	2.06958	0.756378	2.73617	0.00621589	0.0590924	OE9A117156	ID=OE9A117156T1;Parent=OE9A117156;Name=OE9A117156T1;product=OE9A117156P1;md5=029a51b9b78f0f78993a03cf2bf54087;INTERPRO=<table><tr><th>DB</th><th>ID</th><th>Description</th></tr><tr><td>PANTHER</td><td>PTHR22952</td><td></td></tr><tr><td>PANTHER</td><td>PTHR22952:SF137</td><td></td></tr></table>;Description=ABSCISIC ACID-INSENSITIVE 5-like protein 2
OE9A033497	16.6378	2.06824	0.531955	3.888	0.000101075	0.00242969	OE9A033497	ID=OE9A033497T1;Parent=OE9A033497;Name=OE9A033497T1;product=OE9A033497P1;Description=2-hydroxyisoflavanone dehydratase-like;Ontology_term=GO:0008152%2C GO:0016787
OE9A117715	22.1615	2.06295	0.72535	2.84408	0.00445402	0.0466862	OE9A117715	ID=OE9A117715T1;Parent=OE9A117715;Name=OE9A117715T1;product=OE9A117715P1;Description=cellulose synthase G3;Ontology_term=GO:0005982%2C GO:0005985%2C GO:0006011%2C GO:0016021%2C GO:0016760%2C GO:0030244%2C GO:0071555
OE9A063797	5.05189	2.06118	0.80542	2.55914	0.0104931	0.0846347	OE9A063797	ID=OE9A063797T1;Parent=OE9A063797;Name=OE9A063797T1;product=OE9A063797P1;Description=probable aquaporin PIP1-5;Ontology_term=GO:0003723%2C GO:0005215%2C GO:0006364%2C GO:0006810%2C GO:0008033%2C GO:0008168%2C GO:0016021
OE9A020412	70.8272	2.06088	0.449188	4.58802	4.47467e-06	0.000172329	OE9A020412	ID=OE9A020412T1;Parent=OE9A020412;Name=OE9A020412T1;product=OE9A020412P1;Description=NSP-INTERACTING KINASE 1-like;Ontology_term=GO:0004674%2C GO:0005515%2C GO:0005524%2C GO:0006468%2C GO:0009069%2C GO:0016021
OE9A100070	58.3894	2.05839	0.685421	3.0031	0.00267247	0.0319413	OE9A100070	ID=OE9A100070T1;Parent=OE9A100070;Name=OE9A100070T1;product=OE9A100070P1
OE9A021322	76.8003	2.05754	0.352242	5.84128	5.18028e-09	3.74279e-07	OE9A021322	ID=OE9A021322T1;Parent=OE9A021322;Name=OE9A021322T1;product=OE9A021322P1;Description=LRR receptor-like serine threonine- kinase GSO2;Ontology_term=GO:0005515%2C GO:0016021
OE9A118525	164.284	2.05699	0.405909	5.06761	4.02848e-07	2.01416e-05	OE9A118525	ID=OE9A118525T1;Parent=OE9A118525;Name=OE9A118525T1;product=OE9A118525P1;Description=terpene synthase 10-like;Ontology_term=GO:0000287%2C GO:0008152%2C GO:0034002
OE9A097690	9.16397	2.05314	0.732042	2.80467	0.00503676	0.0510826	OE9A097690	ID=OE9A097690T1;Parent=OE9A097690;Name=OE9A097690T1;product=OE9A097690P1;Description=photosystem II core complex s psbY, chloroplastic-like;Ontology_term=GO:0009523%2C GO:0015979%2C GO:0016021%2C GO:0030145
OE9A048965	112.261	2.05174	0.384702	5.33333	9.64276e-08	5.47184e-06	OE9A048965	ID=OE9A048965T1;Parent=OE9A048965;Name=OE9A048965T1;product=OE9A048965P1;Description=ammonium transporter 3 member 1-like;Ontology_term=GO:0005887%2C GO:0008519%2C GO:0015695%2C GO:0019740%2C GO:0072488
OE9A010853	397.874	2.04194	0.792518	2.57652	0.00998012	0.0815525	OE9A010853	ID=OE9A010853T1;Parent=OE9A010853;Name=OE9A010853T1;product=OE9A010853P1;Description=F-box At3g07870-like;Ontology_term=GO:0005515
OE9A012828	15.3486	2.04076	0.728846	2.79998	0.00511053	0.051586	OE9A012828	ID=OE9A012828T1;Parent=OE9A012828;Name=OE9A012828T1;product=OE9A012828P1
OE9A018887	42.3051	2.03787	0.708815	2.87504	0.0040397	0.0434259	OE9A018887	ID=OE9A018887T1;Parent=OE9A018887;Name=OE9A018887T1;product=OE9A018887P1
OE9A103366	173.657	2.03519	0.295425	6.88904	5.61698e-12	7.06225e-10	OE9A103366	ID=OE9A103366T1;Parent=OE9A103366;Name=OE9A103366T1;product=OE9A103366P1;Description=late blight resistance homolog R1A-10;Ontology_term=GO:0043531
OE9A071045	543.098	2.03405	0.268585	7.57322	3.6409e-14	6.71837e-12	OE9A071045	ID=OE9A071045T1;Parent=OE9A071045;Name=OE9A071045T1;product=OE9A071045P1;Description=heat shock 83;Ontology_term=GO:0005524%2C GO:0005737%2C GO:0006457%2C GO:0006950%2C GO:0051082
OE9A080523	177.383	2.03158	0.431535	4.70781	2.50393e-06	0.000104402	OE9A080523	ID=OE9A080523T1;Parent=OE9A080523;Name=OE9A080523T1;product=OE9A080523P1
OE9A059109	25.9048	2.03134	0.521409	3.89587	9.78472e-05	0.00236539	OE9A059109	ID=OE9A059109T3;Parent=OE9A059109;Name=OE9A059109T3;product=OE9A059109P3
OE9A019605	6.8562	2.031	0.759041	2.67574	0.00745645	0.0669879	OE9A019605	ID=OE9A019605T1;Parent=OE9A019605;Name=OE9A019605T1;product=OE9A019605P1;Description=calcium permeable stress-gated cation channel 1-like isoform X1;Ontology_term=GO:0016021
OE9A022882	21.2038	2.02779	0.639249	3.17215	0.00151316	0.0209676	OE9A022882	ID=OE9A022882T1;Parent=OE9A022882;Name=OE9A022882T1;product=OE9A022882P1;Description=wall-associated receptor kinase-like 8;Ontology_term=GO:0004674%2C GO:0005524%2C GO:0005886%2C GO:0006468%2C GO:0007166%2C GO:0009069%2C GO:0016021
OE9A066436	10.3664	2.0271	0.65695	3.08562	0.00203125	0.0263795	OE9A066436	ID=OE9A066436T1;Parent=OE9A066436;Name=OE9A066436T1;product=OE9A066436P1;Description=lamin;Ontology_term=GO:0006118%2C GO:0009055
OE9A019960	25.381	2.02558	0.459141	4.41168	1.02573e-05	0.00035314	OE9A019960	ID=OE9A019960T2;Parent=OE9A019960;Name=OE9A019960T2;product=OE9A019960P2;Description=glutamate receptor -like;Ontology_term=GO:0004970%2C GO:0006811%2C GO:0007165%2C GO:0007268%2C GO:0016020
OE9A047953	5.89805	2.02393	0.758067	2.66986	0.00758836	0.0677656	OE9A047953	ID=OE9A047953T1;Parent=OE9A047953;Name=OE9A047953T1;product=OE9A047953P1;Description=UDP-N-acetylglucosamine transferase subunit ALG14 homolog;Ontology_term=GO:0016021
OE9A084229	34.1901	2.00713	0.391675	5.12449	2.98343e-07	1.53659e-05	OE9A084229	ID=OE9A084229T1;Parent=OE9A084229;Name=OE9A084229T1;product=OE9A084229P1
OE9A100116	119.761	2.00654	0.349271	5.74494	9.19518e-09	6.33998e-07	OE9A100116	ID=OE9A100116T1;Parent=OE9A100116;Name=OE9A100116T1;product=OE9A100116P1;Description=probable LRR receptor-like serine threonine- kinase At3g47570;Ontology_term=GO:0004672%2C GO:0005515%2C GO:0005524%2C GO:0006468
OE9A104662	34.0403	2.00191	0.462173	4.33152	1.48085e-05	0.000482009	OE9A104662	ID=OE9A104662T1;Parent=OE9A104662;Name=OE9A104662T1;product=OE9A104662P1;Description=LRR receptor-like serine threonine- kinase GSO1;Ontology_term=GO:0005515

## Sheet: ShinyGO UP FC > 2
	Enrichment FDR	nGenes	Pathway Genes	Fold Enrichment	Pathways (click for details)	Genes
	1.4e-12	22	406	9	GO:0016705 Oxidoreductase activity, acting on paired donors, with incorporation or reduction of mole	OE9A004056 OE9A009627 OE9A023640 OE9A025629 OE9A030206 OE9A034701 OE9A036713 OE9A043562 OE9A045303 OE9A046380 OE9A048798 OE9A053892 OE9A066301 OE9A083940 OE9A090097 OE9A090761 OE9A093824 OE9A094691 OE9A095668 OE9A099659 OE9A119429 OE9A120982
	1.4e-12	28	722	6.5	GO:0020037 Heme binding	OE9A004056 OE9A009627 OE9A023640 OE9A025629 OE9A030206 OE9A034648 OE9A034701 OE9A036713 OE9A043562 OE9A045303 OE9A046380 OE9A048798 OE9A053718 OE9A053892 OE9A063911 OE9A066301 OE9A083940 OE9A088586 OE9A090097 OE9A090761 OE9A093824 OE9A094691 OE9A095668 OE9A099659 OE9A105698 OE9A108606 OE9A119429 OE9A120982
	4.9e-11	13	123	17.6	GO:0010333 Terpene synthase activity	OE9A022660 OE9A023324 OE9A039171 OE9A042037 OE9A044770 OE9A050526 OE9A065231 OE9A066825 OE9A077229 OE9A084435 OE9A087215 OE9A101007 OE9A106169
	4.9e-11	25	664	6.3	GO:0005506 Iron ion binding	OE9A004056 OE9A009627 OE9A023640 OE9A025629 OE9A030206 OE9A034648 OE9A034701 OE9A036713 OE9A043562 OE9A045303 OE9A046380 OE9A048798 OE9A053892 OE9A066301 OE9A083940 OE9A090097 OE9A090761 OE9A093824 OE9A094691 OE9A095668 OE9A099659 OE9A105698 OE9A108606 OE9A119429 OE9A120982
	5e-08	15	310	8.1	GO:0000287 Magnesium ion binding	OE9A022660 OE9A023324 OE9A039171 OE9A042037 OE9A044770 OE9A050526 OE9A065231 OE9A066825 OE9A071210 OE9A077229 OE9A084435 OE9A087215 OE9A101007 OE9A106169 OE9A118525
	2.9e-07	9	94	16	GO:0009607 Response to biotic stimulus	OE9A032110 OE9A038120 OE9A047084 OE9A051438 OE9A096921 OE9A101219 OE9A104343 OE9A106052 OE9A118859
	4e-07	43	2739	2.6	GO:0055114 Oxidation-reduction process	OE9A004056 OE9A009627 OE9A011130 OE9A021130 OE9A023640 OE9A025629 OE9A030206 OE9A034648 OE9A034701 OE9A036713 OE9A037591 OE9A043562 OE9A044477 OE9A045303 OE9A046380 OE9A048798 OE9A053718 OE9A053892 OE9A059461 OE9A063911 OE9A066301 OE9A076339 OE9A076943 OE9A077702 OE9A079697 OE9A083940 OE9A088586 OE9A090097 OE9A090761 OE9A090808 OE9A093824 OE9A094198 OE9A094691 OE9A095668 OE9A099036 OE9A099659 OE9…
	4.7e-07	19	632	5	GO:0008152 Metabolic process	OE9A022660 OE9A023324 OE9A033497 OE9A039171 OE9A042037 OE9A046869 OE9A048337 OE9A048584 OE9A050526 OE9A051077 OE9A059852 OE9A066825 OE9A076113 OE9A077229 OE9A084435 OE9A087215 OE9A101007 OE9A106169 OE9A118525
	7.7e-06	12	291	6.9	GO:0004497 Monooxygenase activity	OE9A004056 OE9A009627 OE9A023640 OE9A030206 OE9A045303 OE9A066301 OE9A083940 OE9A090097 OE9A090761 OE9A095668 OE9A099659 OE9A120982
	2.6e-05	10	217	7.7	GO:0006952 Defense response	OE9A006693 OE9A032110 OE9A038120 OE9A047084 OE9A051438 OE9A096921 OE9A101219 OE9A104343 OE9A106052 OE9A118859
	0.00033	21	1188	2.9	GO:0004672 Protein kinase activity	OE9A022053 OE9A027483 OE9A037305 OE9A049747 OE9A056229 OE9A060010 OE9A069039 OE9A079030 OE9A081289 OE9A085416 OE9A090970 OE9A091680 OE9A092969 OE9A098085 OE9A100116 OE9A100467 OE9A103393 OE9A113459 OE9A114451 OE9A116782 OE9A121332
	0.0042	27	2090	2.2	GO:0006468 Protein phosphorylation	OE9A020412 OE9A022053 OE9A022882 OE9A027483 OE9A037305 OE9A042238 OE9A048743 OE9A049747 OE9A056229 OE9A060010 OE9A069039 OE9A079030 OE9A081289 OE9A085416 OE9A087555 OE9A090970 OE9A091680 OE9A092969 OE9A098085 OE9A100116 OE9A100467 OE9A101017 OE9A103393 OE9A113459 OE9A114451 OE9A116782 OE9A121332
	0.0067	2	5	66.7	GO:0006809 Nitric oxide biosynthetic process	OE9A053718 OE9A063911
	0.0067	2	5	66.7	GO:0043546 Molybdopterin cofactor binding	OE9A053718 OE9A063911
	0.0067	2	5	66.7	GO:0050464 Nitrate reductase (NADPH) activity	OE9A053718 OE9A063911
	0.012	2	7	47.7	GO:0009800 Cinnamic acid biosynthetic process	OE9A049944 OE9A095147
	0.012	2	7	47.7	GO:0031640 Killing of cells of other organism	OE9A012806 OE9A013634
	0.014	2	9	37.1	GO:0006559 L-phenylalanine catabolic process	OE9A049944 OE9A095147
	0.014	2	9	37.1	GO:0006664 Glycolipid metabolic process	OE9A010385 OE9A084990
	0.014	2	8	41.7	GO:0009703 Nitrate reductase (NADH) activity	OE9A053718 OE9A063911

## Sheet: DOWN FC <-2
List of Differential Expressed Genes (DEGs) fold change (FC) <-2 of olives treated with Onion at T2 compared with the same plants at T0.
Gene ID	baseMean	log2FoldChange	lfcSE	stat	pvalue	padj	id gene	Description
OE9A005875	246.358	-8.06764	1.09587	-7.36185	1.81373e-13	3.04055e-11	OE9A005875	ID=OE9A005875T1;Parent=OE9A005875;Name=OE9A005875T1;product=OE9A005875P1;Description=dehydration-responsive element-binding 1E-like;Ontology_term=GO:0003677%2C GO:0003700%2C GO:0005634%2C GO:0005667%2C GO:0006355%2C GO:0045449
OE9A100291	824.6	-7.66205	0.800412	-9.57263	1.04218e-21	1.11378e-18	OE9A100291	ID=OE9A100291T1;Parent=OE9A100291;Name=OE9A100291T1;product=OE9A100291P1;Description=xyloglucan endotransglycosylase hydrolase;Ontology_term=GO:0004553%2C GO:0005618%2C GO:0010411%2C GO:0016762%2C GO:0042546%2C GO:0048046%2C GO:0071555
OE9A076184	30.5609	-7.28519	1.11249	-6.54857	5.80923e-11	6.10659e-09	OE9A076184	ID=OE9A076184T1;Parent=OE9A076184;Name=OE9A076184T1;product=OE9A076184P1;Description=ethylene-responsive transcription factor ERF017-like;Ontology_term=GO:0003677%2C GO:0003700%2C GO:0005667%2C GO:0006355%2C GO:0045449
OE9A000299	1409.69	-7.16188	0.816698	-8.76931	1.79759e-18	9.04047e-16	OE9A000299	ID=OE9A000299T1;Parent=OE9A000299;Name=OE9A000299T1;product=OE9A000299P1;Description=dehydration-responsive element-binding 1A;Ontology_term=GO:0003677%2C GO:0003700%2C GO:0005634%2C GO:0005667%2C GO:0006355%2C GO:0045449
OE9A007593	77.5854	-6.99137	1.00619	-6.94834	3.69617e-12	4.86169e-10	OE9A007593	ID=OE9A007593T1;Parent=OE9A007593;Name=OE9A007593T1;product=OE9A007593P1
OE9A090863	1776.77	-6.81492	0.722267	-9.43546	3.89288e-21	3.32828e-18	OE9A090863	ID=OE9A090863T1;Parent=OE9A090863;Name=OE9A090863T1;product=OE9A090863P1;Description=xyloglucan endotransglycosylase hydrolase;Ontology_term=GO:0004553%2C GO:0005618%2C GO:0010411%2C GO:0016762%2C GO:0042546%2C GO:0048046%2C GO:0071555
OE9A004366	5.51138	-6.46081	1.51613	-4.26139	2.03155e-05	0.000630839	OE9A004366	ID=OE9A004366T1;Parent=OE9A004366;Name=OE9A004366T1;product=OE9A004366P1
OE9A041022	494.045	-6.39702	0.670867	-9.53546	1.49222e-21	1.41755e-18	OE9A041022	ID=OE9A041022T1;Parent=OE9A041022;Name=OE9A041022T1;product=OE9A041022P1;Description=xyloglucan endotransglycosylase hydrolase;Ontology_term=GO:0004553%2C GO:0005618%2C GO:0010411%2C GO:0016762%2C GO:0042546%2C GO:0048046%2C GO:0071555
OE9A098499	1205.69	-6.37411	0.608124	-10.4816	1.04974e-25	3.36561e-22	OE9A098499	ID=OE9A098499T1;Parent=OE9A098499;Name=OE9A098499T1;product=OE9A098499P1
OE9A053553	20.1188	-6.33174	1.11686	-5.66925	1.43425e-08	9.6301e-07	OE9A053553	ID=OE9A053553T1;Parent=OE9A053553;Name=OE9A053553T1;product=OE9A053553P1
OE9A090940	13.9895	-6.21355	1.1885	-5.22804	1.71317e-07	9.25077e-06	OE9A090940	ID=OE9A090940T1;Parent=OE9A090940;Name=OE9A090940T1;product=OE9A090940P1;Description=calcium-binding CML38-like;Ontology_term=GO:0005509
OE9A048804	2971	-6.20426	0.563135	-11.0174	3.1518e-28	2.02102e-24	OE9A048804	ID=OE9A048804T1;Parent=OE9A048804;Name=OE9A048804T1;product=OE9A048804P1
OE9A051495	859.328	-6.15114	0.977735	-6.29121	3.14992e-10	2.91669e-08	OE9A051495	ID=OE9A051495T1;Parent=OE9A051495;Name=OE9A051495T1;product=OE9A051495P1;Description=ethylene-responsive transcription factor ERF017-like;Ontology_term=GO:0003677%2C GO:0003700%2C GO:0005667%2C GO:0006355%2C GO:0045449
OE9A055755	27.5497	-6.03997	0.939813	-6.42677	1.30341e-10	1.28581e-08	OE9A055755	ID=OE9A055755T1;Parent=OE9A055755;Name=OE9A055755T1;product=OE9A055755P1
OE9A022901	12.9062	-5.9785	2.1505	-2.78005	0.005435	0.0539692	OE9A022901	ID=OE9A022901T1;Parent=OE9A022901;Name=OE9A022901T1;product=OE9A022901P1
OE9A095641	7.68663	-5.95695	1.29488	-4.60039	4.21691e-06	0.000163878	OE9A095641	ID=OE9A095641T1;Parent=OE9A095641;Name=OE9A095641T1;product=OE9A095641P1
OE9A038318	14.1216	-5.86564	1.83519	-3.1962	0.00139249	0.0197402	OE9A038318	ID=OE9A038318T1;Parent=OE9A038318;Name=OE9A038318T1;product=OE9A038318P1;Description=xyloglucan endotransglucosylase hydrolase 2-like;Ontology_term=GO:0004553%2C GO:0005618%2C GO:0010411%2C GO:0016762%2C GO:0042546%2C GO:0048046
OE9A112468	5.7519	-5.84587	1.64911	-3.54487	0.000392804	0.00735403	OE9A112468	ID=OE9A112468T1;Parent=OE9A112468;Name=OE9A112468T1;product=OE9A112468P1;Description=xyloglucan endotransglucosylase hydrolase 2-like;Ontology_term=GO:0004553%2C GO:0005618%2C GO:0010411%2C GO:0016762%2C GO:0042546%2C GO:0048046
OE9A074452	5.14109	-5.83632	1.37273	-4.2516	2.1225e-05	0.000654326	OE9A074452	ID=OE9A074452T1;Parent=OE9A074452;Name=OE9A074452T1;product=OE9A074452P1;Description=RING-H2 finger ATL2-like;Ontology_term=GO:0005515%2C GO:0008270
OE9A023527	2278.55	-5.83176	0.578742	-10.0766	7.00985e-24	1.19864e-20	OE9A023527	ID=OE9A023527T1;Parent=OE9A023527;Name=OE9A023527T1;product=OE9A023527P1
OE9A006362	2696.15	-5.80853	0.572102	-10.153	3.21454e-24	6.65713e-21	OE9A006362	ID=OE9A006362T1;Parent=OE9A006362;Name=OE9A006362T1;product=OE9A006362P1
OE9A024278	7.94401	-5.77947	1.46498	-3.94509	7.9771e-05	0.00197706	OE9A024278	ID=OE9A024278T1;Parent=OE9A024278;Name=OE9A024278T1;product=OE9A024278P1;Description=calcium-binding CML38;Ontology_term=GO:0005509
OE9A031635	3128.18	-5.72	0.559169	-10.2295	1.46346e-24	3.75362e-21	OE9A031635	ID=OE9A031635T1;Parent=OE9A031635;Name=OE9A031635T1;product=OE9A031635P1
OE9A024350	116.439	-5.68645	0.602361	-9.44027	3.71813e-21	3.2885e-18	OE9A024350	ID=OE9A024350T1;Parent=OE9A024350;Name=OE9A024350T1;product=OE9A024350P1
OE9A027095	436.213	-5.67594	1.0636	-5.33653	9.47409e-08	5.40002e-06	OE9A027095	ID=OE9A027095T1;Parent=OE9A027095;Name=OE9A027095T1;product=OE9A027095P1;Description=calcium-binding CML38-like;Ontology_term=GO:0005509
OE9A015473	128.889	-5.666	0.731446	-7.74629	9.46135e-15	2.07414e-12	OE9A015473	ID=OE9A015473T1;Parent=OE9A015473;Name=OE9A015473T1;product=OE9A015473P1
OE9A008141	38.8447	-5.63525	1.20139	-4.69061	2.72389e-06	0.000112323	OE9A008141	ID=OE9A008141T1;Parent=OE9A008141;Name=OE9A008141T1;product=OE9A008141P1;Description=xyloglucan endotransglucosylase hydrolase 2-like;Ontology_term=GO:0004553%2C GO:0005618%2C GO:0010411%2C GO:0016762%2C GO:0042546%2C GO:0048046
OE9A052108	2640.9	-5.63306	0.651555	-8.64557	5.3536e-18	2.36767e-15	OE9A052108	ID=OE9A052108T1;Parent=OE9A052108;Name=OE9A052108T1;product=OE9A052108P1
OE9A019029	101.213	-5.58888	0.73613	-7.59224	3.14422e-14	5.92986e-12	OE9A019029	ID=OE9A019029T1;Parent=OE9A019029;Name=OE9A019029T1;product=OE9A019029P1;Description=ethylene-responsive transcription factor ERF027;Ontology_term=GO:0003677%2C GO:0003700%2C GO:0005667%2C GO:0006355%2C GO:0045449
OE9A095034	1262.27	-5.58763	0.526544	-10.6119	2.62374e-26	1.12161e-22	OE9A095034	ID=OE9A095034T1;Parent=OE9A095034;Name=OE9A095034T1;product=OE9A095034P1
OE9A012128	7.67539	-5.57426	1.38126	-4.03563	5.44559e-05	0.00143994	OE9A012128	ID=OE9A012128T1;Parent=OE9A012128;Name=OE9A012128T1;product=OE9A012128P1;Description=ethylene-responsive transcription factor ERF027-like;Ontology_term=GO:0003700%2C GO:0005634%2C GO:0005667%2C GO:0006355%2C GO:0019760%2C GO:0043565%2C GO:0044212%2C GO:0045449%2C GO:0050832
OE9A016847	1170.57	-5.5566	0.615662	-9.02541	1.79023e-19	1.14794e-16	OE9A016847	ID=OE9A016847T1;Parent=OE9A016847;Name=OE9A016847T1;product=OE9A016847P1
OE9A050511	48.5203	-5.53856	0.979757	-5.65299	1.57677e-08	1.05046e-06	OE9A050511	ID=OE9A050511T1;Parent=OE9A050511;Name=OE9A050511T1;product=OE9A050511P1
OE9A079911	379.065	-5.45507	1.01385	-5.38055	7.42572e-08	4.32869e-06	OE9A079911	ID=OE9A079911T1;Parent=OE9A079911;Name=OE9A079911T1;product=OE9A079911P1;Description=ethylene-responsive transcription factor ERF109-like;Ontology_term=GO:0003677%2C GO:0003700%2C GO:0005667%2C GO:0006355%2C GO:0045449
OE9A072466	1997.7	-5.42767	0.747095	-7.26504	3.72941e-13	5.76239e-11	OE9A072466	ID=OE9A072466T1;Parent=OE9A072466;Name=OE9A072466T1;product=OE9A072466P1;Description=BON1-associated 2-like;Ontology_term=GO:0005515
OE9A007517	64.8402	-5.36002	0.989689	-5.41587	6.09924e-08	3.63812e-06	OE9A007517	ID=OE9A007517T1;Parent=OE9A007517;Name=OE9A007517T1;product=OE9A007517P1
OE9A114387	62.612	-5.32849	0.717523	-7.42622	1.11744e-13	1.96309e-11	OE9A114387	ID=OE9A114387T1;Parent=OE9A114387;Name=OE9A114387T1;product=OE9A114387P1;Description=C-repeat dehydration-responsive element-binding factor 4;Ontology_term=GO:0003677%2C GO:0003700%2C GO:0005634%2C GO:0005667%2C GO:0006355%2C GO:0045449
OE9A032361	258.434	-5.30537	0.696168	-7.62081	2.5209e-14	4.93576e-12	OE9A032361	ID=OE9A032361T1;Parent=OE9A032361;Name=OE9A032361T1;product=OE9A032361P1;Description=probable xyloglucan endotransglucosylase hydrolase 23;Ontology_term=GO:0004553%2C GO:0005618%2C GO:0010411%2C GO:0016762%2C GO:0042546%2C GO:0048046%2C GO:0071555
OE9A116478	18.4008	-5.2433	1.22001	-4.29774	1.72546e-05	0.000549086	OE9A116478	ID=OE9A116478T1;Parent=OE9A116478;Name=OE9A116478T1;product=OE9A116478P1
OE9A047454	20.8391	-5.23418	1.11103	-4.71111	2.4637e-06	0.000103254	OE9A047454	ID=OE9A047454T1;Parent=OE9A047454;Name=OE9A047454T1;product=OE9A047454P1;Description=ethylene-responsive transcription factor ERF109-like;Ontology_term=GO:0003677%2C GO:0003700%2C GO:0005667%2C GO:0006355%2C GO:0045449
OE9A043612	359.721	-5.23186	0.840177	-6.2271	4.75162e-10	4.27629e-08	OE9A043612	ID=OE9A043612T1;Parent=OE9A043612;Name=OE9A043612T1;product=OE9A043612P1;Description=cytochrome P450 94C1-like;Ontology_term=GO:0004497%2C GO:0005506%2C GO:0016021%2C GO:0016705%2C GO:0020037%2C GO:0055114
OE9A028341	420.883	-5.18167	0.590799	-8.77061	1.77698e-18	9.04047e-16	OE9A028341	ID=OE9A028341T1;Parent=OE9A028341;Name=OE9A028341T1;product=OE9A028341P1;Description=C-repeat dehydration-responsive element-binding factor 4;Ontology_term=GO:0003677%2C GO:0003700%2C GO:0005634%2C GO:0005667%2C GO:0006355%2C GO:0045449
OE9A019254	876.154	-5.16543	0.708224	-7.2935	3.02001e-13	4.87172e-11	OE9A019254	ID=OE9A019254T1;Parent=OE9A019254;Name=OE9A019254T1;product=OE9A019254P1;Description=BON1-associated 2-like;Ontology_term=GO:0005515
OE9A002541	9717.09	-5.14814	0.81696	-6.30158	2.94617e-10	2.7579e-08	OE9A002541	ID=OE9A002541T1;Parent=OE9A002541;Name=OE9A002541T1;product=OE9A002541P1
OE9A076786	331.658	-5.10593	0.988343	-5.16615	2.38965e-07	1.26375e-05	OE9A076786	ID=OE9A076786T1;Parent=OE9A076786;Name=OE9A076786T1;product=OE9A076786P1
OE9A069420	9528.26	-5.01537	0.600984	-8.34527	7.10529e-17	2.33646e-14	OE9A069420	ID=OE9A069420T1;Parent=OE9A069420;Name=OE9A069420T1;product=OE9A069420P1;Description=zinc finger CCCH domain-containing 29-like;Ontology_term=GO:0005515%2C GO:0046872
OE9A115883	694.153	-4.99855	0.900655	-5.5499	2.85827e-08	1.82368e-06	OE9A115883	ID=OE9A115883T1;Parent=OE9A115883;Name=OE9A115883T1;product=OE9A115883P1;Description=calcium-binding CML19;Ontology_term=GO:0005509
OE9A045533	7.12394	-4.9779	1.4857	-3.35055	0.000806526	0.0130023	OE9A045533	ID=OE9A045533T1;Parent=OE9A045533;Name=OE9A045533T1;product=OE9A045533P1;Description=SAL1 phosphatase-like;Ontology_term=GO:0006790%2C GO:0008441%2C GO:0016311%2C GO:0046854
OE9A033630	1248.5	-4.9583	0.619221	-8.00731	1.17243e-15	3.16544e-13	OE9A033630	ID=OE9A033630T1;Parent=OE9A033630;Name=OE9A033630T1;product=OE9A033630P1;Description=probable galacturonosyltransferase-like 9;Ontology_term=GO:0016757
OE9A037154	11.2667	-4.9428	1.10182	-4.48604	7.25579e-06	0.000261749	OE9A037154	ID=OE9A037154T1;Parent=OE9A037154;Name=OE9A037154T1;product=OE9A037154P1
OE9A030371	41.8127	-4.86104	0.879128	-5.52939	3.21346e-08	2.02015e-06	OE9A030371	ID=OE9A030371T1;Parent=OE9A030371;Name=OE9A030371T1;product=OE9A030371P1;Description=calcium-binding CML19;Ontology_term=GO:0005509
OE9A037441	77.0943	-4.85403	0.58008	-8.36786	5.86762e-17	1.98024e-14	OE9A037441	ID=OE9A037441T1;Parent=OE9A037441;Name=OE9A037441T1;product=OE9A037441P1
OE9A028053	56.451	-4.85193	1.00083	-4.8479	1.24775e-06	5.58524e-05	OE9A028053	ID=OE9A028053T1;Parent=OE9A028053;Name=OE9A028053T1;product=OE9A028053P1;Description=phospholipase A1-Igamma1, chloroplastic;Ontology_term=GO:0006629%2C GO:0016787
OE9A047201	463.471	-4.84355	0.726165	-6.67004	2.55732e-11	2.83951e-09	OE9A047201	ID=OE9A047201T1;Parent=OE9A047201;Name=OE9A047201T1;product=OE9A047201P1
OE9A049811	1442.87	-4.81261	0.554313	-8.68212	3.88476e-18	1.81164e-15	OE9A049811	ID=OE9A049811T1;Parent=OE9A049811;Name=OE9A049811T1;product=OE9A049811P1;Description=zinc finger ZAT10-like;Ontology_term=GO:0046872
OE9A002067	595.747	-4.80417	0.456578	-10.5221	6.83249e-26	2.50352e-22	OE9A002067	ID=OE9A002067T1;Parent=OE9A002067;Name=OE9A002067T1;product=OE9A002067P1;Description=calcium-binding PBP1-like;Ontology_term=GO:0005509
OE9A076025	50.9089	-4.79611	0.673811	-7.11788	1.09597e-12	1.54453e-10	OE9A076025	ID=OE9A076025T1;Parent=OE9A076025;Name=OE9A076025T1;product=OE9A076025P1
OE9A110715	262.587	-4.77604	0.591133	-8.07948	6.50438e-16	1.80333e-13	OE9A110715	ID=OE9A110715T1;Parent=OE9A110715;Name=OE9A110715T1;product=OE9A110715P1
OE9A002219	1294.36	-4.77196	0.940245	-5.07523	3.87023e-07	1.94506e-05	OE9A002219	ID=OE9A002219T1;Parent=OE9A002219;Name=OE9A002219T1;product=OE9A002219P1;Description=ethylene-responsive transcription factor ERF017-like;Ontology_term=GO:0003677%2C GO:0003700%2C GO:0005667%2C GO:0006355%2C GO:0045449
OE9A061634	5.54599	-4.76943	1.61011	-2.96217	0.0030548	0.035183	OE9A061634	ID=OE9A061634T1;Parent=OE9A061634;Name=OE9A061634T1;product=OE9A061634P1;Description=DEAD-box ATP-dependent RNA helicase 53-like;Ontology_term=GO:0003676%2C GO:0004386%2C GO:0005524
OE9A105581	173.175	-4.75285	0.498328	-9.5376	1.46174e-21	1.41755e-18	OE9A105581	ID=OE9A105581T1;Parent=OE9A105581;Name=OE9A105581T1;product=OE9A105581P1;Description=dehydration-responsive element-binding 1E-like;Ontology_term=GO:0003677%2C GO:0003700%2C GO:0005634%2C GO:0005667%2C GO:0006355%2C GO:0045449
OE9A043040	7298.95	-4.74353	0.496167	-9.56035	1.17354e-21	1.204e-18	OE9A043040	ID=OE9A043040T1;Parent=OE9A043040;Name=OE9A043040T1;product=OE9A043040P1;Description=zinc finger CCCH domain-containing 29-like;Ontology_term=GO:0005515%2C GO:0046872
OE9A043316	5.63215	-4.73823	1.7023	-2.78343	0.00537871	0.0535553	OE9A043316	ID=OE9A043316T1;Parent=OE9A043316;Name=OE9A043316T1;product=OE9A043316P1;Description=ethylene-responsive transcription factor ERF109-like;Ontology_term=GO:0003677%2C GO:0003700%2C GO:0005667%2C GO:0006355%2C GO:0045449
OE9A108739	10.5779	-4.73079	1.90522	-2.48307	0.0130256	0.0981766	OE9A108739	ID=OE9A108739T1;Parent=OE9A108739;Name=OE9A108739T1;product=OE9A108739P1
OE9A102863	4.76515	-4.70993	1.36985	-3.43827	0.000585449	0.0101392	OE9A102863	ID=OE9A102863T1;Parent=OE9A102863;Name=OE9A102863T1;product=OE9A102863P1
OE9A087938	120.763	-4.70176	1.06085	-4.43206	9.33382e-06	0.00032795	OE9A087938	ID=OE9A087938T1;Parent=OE9A087938;Name=OE9A087938T1;product=OE9A087938P1;Description=U-box domain-containing 21-like;Ontology_term=GO:0004842%2C GO:0005488%2C GO:0016567
OE9A006386	3818.86	-4.68402	0.512979	-9.13102	6.78547e-20	5.11884e-17	OE9A006386	ID=OE9A006386T1;Parent=OE9A006386;Name=OE9A006386T1;product=OE9A006386P1;Description=zinc finger CCCH domain-containing 29-like;Ontology_term=GO:0005515%2C GO:0046872
OE9A081748	6.3	-4.63508	1.11361	-4.1622	3.15196e-05	0.000916605	OE9A081748	ID=OE9A081748T1;Parent=OE9A081748;Name=OE9A081748T1;product=OE9A081748P1;Description=ethylene-responsive transcription factor ERF014-like;Ontology_term=GO:0003677%2C GO:0003700%2C GO:0005667%2C GO:0006355%2C GO:0045449
OE9A006737	692.245	-4.62601	0.540799	-8.55404	1.18858e-17	4.55015e-15	OE9A006737	ID=OE9A006737T1;Parent=OE9A006737;Name=OE9A006737T1;product=OE9A006737P1;Description=serine threonine- kinase CCR4;Ontology_term=GO:0004672%2C GO:0005524%2C GO:0006468%2C GO:0016020
OE9A075686	51.0332	-4.59097	1.52527	-3.00993	0.00261307	0.0314661	OE9A075686	ID=OE9A075686T1;Parent=OE9A075686;Name=OE9A075686T1;product=OE9A075686P1;Description=E3 ubiquitin- ligase PUB23-like;Ontology_term=GO:0004842%2C GO:0005488%2C GO:0016567
OE9A051180	7.69457	-4.57939	1.48517	-3.0834	0.00204647	0.0265638	OE9A051180	ID=OE9A051180T1;Parent=OE9A051180;Name=OE9A051180T1;product=OE9A051180P1
OE9A001039	948.513	-4.5625	0.564506	-8.08228	6.35658e-16	1.80333e-13	OE9A001039	ID=OE9A001039T1;Parent=OE9A001039;Name=OE9A001039T1;product=OE9A001039P1;Description=O-fucosyltransferase 20-like;Ontology_term=GO:0005737%2C GO:0016021
OE9A045269	721.403	-4.54941	1.07693	-4.22441	2.39564e-05	0.000723743	OE9A045269	ID=OE9A045269T1;Parent=OE9A045269;Name=OE9A045269T1;product=OE9A045269P1;Description=E3 ubiquitin- ligase PUB23-like;Ontology_term=GO:0004842%2C GO:0005488%2C GO:0016567%2C GO:0016874
OE9A064506	648.064	-4.54604	0.538021	-8.44955	2.92423e-17	1.02745e-14	OE9A064506	ID=OE9A064506T1;Parent=OE9A064506;Name=OE9A064506T1;product=OE9A064506P1;Description=COBRA 7;Ontology_term=GO:0010215%2C GO:0016021%2C GO:0016049%2C GO:0031225
OE9A118827	158.188	-4.53383	0.516416	-8.77941	1.64331e-18	8.71413e-16	OE9A118827	ID=OE9A118827T1;Parent=OE9A118827;Name=OE9A118827T1;product=OE9A118827P1;Description=ethylene-responsive transcription factor ERF014-like;Ontology_term=GO:0003677%2C GO:0003700%2C GO:0005667%2C GO:0006355%2C GO:0045449
OE9A002944	7.13474	-4.53332	1.53095	-2.96111	0.00306534	0.0352569	OE9A002944	ID=OE9A002944T1;Parent=OE9A002944;Name=OE9A002944T1;product=OE9A002944P1
OE9A037727	132.782	-4.51345	0.839542	-5.37609	7.61219e-08	4.42732e-06	OE9A037727	ID=OE9A037727T1;Parent=OE9A037727;Name=OE9A037727T1;product=OE9A037727P1;Description=probable galacturonosyltransferase-like 10;Ontology_term=GO:0000271%2C GO:0005794%2C GO:0016757
OE9A095378	369.683	-4.48232	0.935715	-4.79026	1.66563e-06	7.25328e-05	OE9A095378	ID=OE9A095378T1;Parent=OE9A095378;Name=OE9A095378T1;product=OE9A095378P1;Description=ethylene-responsive transcription factor ERF017-like;Ontology_term=GO:0003677%2C GO:0003700%2C GO:0005667%2C GO:0006355%2C GO:0045449
OE9A076093	47.1201	-4.42237	1.71348	-2.58094	0.00985331	0.0810544	OE9A076093	ID=OE9A076093T1;Parent=OE9A076093;Name=OE9A076093T1;product=OE9A076093P1;Description=E3 ubiquitin- ligase PUB23-like;Ontology_term=GO:0004842%2C GO:0005488%2C GO:0016567
OE9A005899	331.23	-4.42212	0.642405	-6.88368	5.83245e-12	7.29739e-10	OE9A005899	ID=OE9A005899T1;Parent=OE9A005899;Name=OE9A005899T1;product=OE9A005899P1;Description=metalloendo ase 2-MMP-like;Ontology_term=GO:0004222%2C GO:0006508%2C GO:0008270%2C GO:0016021%2C GO:0031012
OE9A095768	3924.23	-4.40445	0.633672	-6.95067	3.63551e-12	4.80656e-10	OE9A095768	ID=OE9A095768T1;Parent=OE9A095768;Name=OE9A095768T1;product=OE9A095768P1;Description=mitochondrial uncoupling 5-like;Ontology_term=GO:0003735%2C GO:0005840%2C GO:0006412%2C GO:0006839%2C GO:0016021%2C GO:0031966%2C GO:0042254%2C GO:0055085
OE9A016793	5372.17	-4.38675	0.640894	-6.84473	7.66191e-12	9.40289e-10	OE9A016793	ID=OE9A016793T1;Parent=OE9A016793;Name=OE9A016793T1;product=OE9A016793P1;Description=E3 ubiquitin- ligase RING1;Ontology_term=GO:0005515%2C GO:0008270
OE9A046089	4.48999	-4.38277	1.46674	-2.98811	0.00280711	0.0331948	OE9A046089	ID=OE9A046089T1;Parent=OE9A046089;Name=OE9A046089T1;product=OE9A046089P1
OE9A020210	227.722	-4.37447	1.1895	-3.67757	0.000235467	0.00482773	OE9A020210	ID=OE9A020210T1;Parent=OE9A020210;Name=OE9A020210T1;product=OE9A020210P1;Description=E3 ubiquitin- ligase PUB23-like;Ontology_term=GO:0004842%2C GO:0005488%2C GO:0016567%2C GO:0016874
OE9A013985	3247.71	-4.35303	0.552505	-7.87872	3.30757e-15	7.7831e-13	OE9A013985	ID=OE9A013985T1;Parent=OE9A013985;Name=OE9A013985T1;product=OE9A013985P1;Description=zinc finger ZAT10-like;Ontology_term=GO:0046872
OE9A026208	320.714	-4.30478	0.959078	-4.48846	7.17405e-06	0.000259531	OE9A026208	ID=OE9A026208T1;Parent=OE9A026208;Name=OE9A026208T1;product=OE9A026208P1
OE9A075531	289.776	-4.27076	0.629335	-6.78614	1.15175e-11	1.37402e-09	OE9A075531	ID=OE9A075531T1;Parent=OE9A075531;Name=OE9A075531T1;product=OE9A075531P1
OE9A090698	6584.31	-4.22969	0.612376	-6.90701	4.94971e-12	6.2849e-10	OE9A090698	ID=OE9A090698T1;Parent=OE9A090698;Name=OE9A090698T1;product=OE9A090698P1;Description=mitochondrial uncoupling 5-like;Ontology_term=GO:0003735%2C GO:0005840%2C GO:0006412%2C GO:0006839%2C GO:0016021%2C GO:0031966%2C GO:0042254
OE9A114342	536.528	-4.21791	0.466833	-9.03517	1.63742e-19	1.07688e-16	OE9A114342	ID=OE9A114342T1;Parent=OE9A114342;Name=OE9A114342T1;product=OE9A114342P1;Description=calcium-binding PBP1-like;Ontology_term=GO:0005509
OE9A046304	20.8505	-4.21503	0.825037	-5.10891	3.24029e-07	1.65558e-05	OE9A046304	ID=OE9A046304T1;Parent=OE9A046304;Name=OE9A046304T1;product=OE9A046304P1
OE9A018150	5.52885	-4.21503	1.53444	-2.74694	0.00601533	0.0578941	OE9A018150	ID=OE9A018150T1;Parent=OE9A018150;Name=OE9A018150T1;product=OE9A018150P1;Description=LOB domain-containing 25-like isoform X2;Ontology_term=GO:0005515
OE9A001028	17.2257	-4.20163	1.29248	-3.25082	0.00115073	0.0172301	OE9A001028	ID=OE9A001028T1;Parent=OE9A001028;Name=OE9A001028T1;product=OE9A001028P1;Description=calcium-binding CML19;Ontology_term=GO:0005509
OE9A008243	102.573	-4.19364	0.820041	-5.11394	3.15509e-07	1.6185e-05	OE9A008243	ID=OE9A008243T1;Parent=OE9A008243;Name=OE9A008243T1;product=OE9A008243P1;Description=probable phosphatase 2C 25;Ontology_term=GO:0004721%2C GO:0006470%2C GO:0043169%2C GO:0044763
OE9A020249	124.319	-4.167	0.910644	-4.57588	4.74227e-06	0.000181004	OE9A020249	ID=OE9A020249T1;Parent=OE9A020249;Name=OE9A020249T1;product=OE9A020249P1;Description=probable calcium-binding CML31;Ontology_term=GO:0005509
OE9A101792	1029.91	-4.16253	0.578706	-7.19282	6.34671e-13	9.35556e-11	OE9A101792	ID=OE9A101792T1;Parent=OE9A101792;Name=OE9A101792T1;product=OE9A101792P1;Description=zinc finger ZAT10-like;Ontology_term=GO:0046872
OE9A052006	32.1278	-4.13771	0.601602	-6.87782	6.0775e-12	7.56708e-10	OE9A052006	ID=OE9A052006T1;Parent=OE9A052006;Name=OE9A052006T1;product=OE9A052006P1
OE9A032181	36.6524	-4.13605	1.09865	-3.76465	0.000166779	0.00363443	OE9A032181	ID=OE9A032181T1;Parent=OE9A032181;Name=OE9A032181T1;product=OE9A032181P1
OE9A068607	593.906	-4.13275	0.580403	-7.12049	1.07547e-12	1.52402e-10	OE9A068607	ID=OE9A068607T1;Parent=OE9A068607;Name=OE9A068607T1;product=OE9A068607P1;Description=calcium-binding PBP1-like;Ontology_term=GO:0005509
OE9A101051	185.364	-4.12624	0.693526	-5.94965	2.68724e-09	2.06363e-07	OE9A101051	ID=OE9A101051T1;Parent=OE9A101051;Name=OE9A101051T1;product=OE9A101051P1
OE9A034538	11923.1	-4.10767	0.506608	-8.10819	5.13788e-16	1.48069e-13	OE9A034538	ID=OE9A034538T1;Parent=OE9A034538;Name=OE9A034538T1;product=OE9A034538P1;Description=nematode resistance -like HSPRO2;Ontology_term=GO:0006952
OE9A093828	11.4862	-4.1049	1.12525	-3.64801	0.000264283	0.00529165	OE9A093828	ID=OE9A093828T1;Parent=OE9A093828;Name=OE9A093828T1;product=OE9A093828P1;Description=plastidial lipoyltransferase 2;Ontology_term=GO:0005737%2C GO:0006464%2C GO:0009107%2C GO:0016415%2C GO:0042967
OE9A121276	6221.26	-4.09161	0.635358	-6.43984	1.19597e-10	1.18897e-08	OE9A121276	ID=OE9A121276T1;Parent=OE9A121276;Name=OE9A121276T1;product=OE9A121276P1;Description=SENESCENCE-ASSOCIATED GENE 21, mitochondrial-like;Ontology_term=GO:0006950
OE9A012024	123.154	-4.07621	0.423147	-9.63307	5.79711e-22	7.08048e-19	OE9A012024	ID=OE9A012024T1;Parent=OE9A012024;Name=OE9A012024T1;product=OE9A012024P1
OE9A033879	29.5824	-4.06943	1.2172	-3.34327	0.000827974	0.0132896	OE9A033879	ID=OE9A033879T1;Parent=OE9A033879;Name=OE9A033879T1;product=OE9A033879P1;Description=ethylene-responsive transcription factor ERF109-like;Ontology_term=GO:0003677%2C GO:0003700%2C GO:0005667%2C GO:0006355%2C GO:0045449
OE9A026139	5.45535	-4.06696	1.437	-2.83016	0.00465245	0.0480709	OE9A026139	ID=OE9A026139T1;Parent=OE9A026139;Name=OE9A026139T1;product=OE9A026139P1;Description=1-aminocyclopropane-1-carboxylate synthase-like;Ontology_term=GO:0006519%2C GO:0016847%2C GO:0030170%2C GO:0042218
OE9A014390	511.103	-4.0583	0.564317	-7.19152	6.40746e-13	9.39114e-11	OE9A014390	ID=OE9A014390T1;Parent=OE9A014390;Name=OE9A014390T1;product=OE9A014390P1;Description=RING-H2 finger ATL60-like;Ontology_term=GO:0005515%2C GO:0008270%2C GO:0044267
OE9A037327	5425.67	-4.04352	0.391129	-10.3381	4.73984e-25	1.3508e-21	OE9A037327	ID=OE9A037327T1;Parent=OE9A037327;Name=OE9A037327T1;product=OE9A037327P1;Description=NDR1 HIN1 3;Ontology_term=GO:0016021
OE9A012920	4.95359	-4.03359	1.0329	-3.90509	9.41897e-05	0.00228343	OE9A012920	ID=OE9A012920T1;Parent=OE9A012920;Name=OE9A012920T1;product=OE9A012920P1;Description=uncharacterized protein LOC111401528;Ontology_term=GO:0004805%2C GO:0005982%2C GO:0005985%2C GO:0005992%2C GO:0016311
OE9A104327	532.759	-4.02095	0.443331	-9.06986	1.19169e-19	8.26102e-17	OE9A104327	ID=OE9A104327T1;Parent=OE9A104327;Name=OE9A104327T1;product=OE9A104327P1;Description=uncharacterized protein LOC105179443;Ontology_term=GO:0016021
OE9A010223	295.742	-4.00719	0.492371	-8.13855	4.00037e-16	1.17937e-13	OE9A010223	ID=OE9A010223T1;Parent=OE9A010223;Name=OE9A010223T1;product=OE9A010223P1
OE9A016967	48.0229	-4.0014	0.739738	-5.40921	6.3304e-08	3.75853e-06	OE9A016967	ID=OE9A016967T1;Parent=OE9A016967;Name=OE9A016967T1;product=OE9A016967P1;Description=ethylene-responsive transcription factor ERF014-like;Ontology_term=GO:0003677%2C GO:0003700%2C GO:0005667%2C GO:0006355%2C GO:0045449
OE9A016940	6.02927	-3.98034	1.44142	-2.7614	0.00575545	0.0562582	OE9A016940	ID=OE9A016940T1;Parent=OE9A016940;Name=OE9A016940T1;product=OE9A016940P1;Description=calcium-binding PBP1-like;Ontology_term=GO:0005509
OE9A032233	9.61606	-3.97578	0.994598	-3.99738	6.40487e-05	0.00164633	OE9A032233	ID=OE9A032233T1;Parent=OE9A032233;Name=OE9A032233T1;product=OE9A032233P1;Description=receptor 12;Ontology_term=GO:0005515
OE9A069045	89.8292	-3.94326	0.5321	-7.41075	1.25586e-13	2.17645e-11	OE9A069045	ID=OE9A069045T1;Parent=OE9A069045;Name=OE9A069045T1;product=OE9A069045P1;Description=uncharacterized protein LOC111386977;Ontology_term=GO:0016020
OE9A103792	421.464	-3.92018	0.480775	-8.15388	3.52436e-16	1.05112e-13	OE9A103792	ID=OE9A103792T1;Parent=OE9A103792;Name=OE9A103792T1;product=OE9A103792P1
OE9A075123	513.425	-3.91272	0.43283	-9.03985	1.56893e-19	1.05899e-16	OE9A075123	ID=OE9A075123T1;Parent=OE9A075123;Name=OE9A075123T1;product=OE9A075123P1;Description=ethylene-responsive transcription factor 5-like;Ontology_term=GO:0003677%2C GO:0003700%2C GO:0005667%2C GO:0006355%2C GO:0045449
OE9A115663	25.8298	-3.9119	1.15265	-3.39382	0.000689248	0.011533	OE9A115663	ID=OE9A115663T1;Parent=OE9A115663;Name=OE9A115663T1;product=OE9A115663P1;Description=U-box domain-containing 21-like;Ontology_term=GO:0004842%2C GO:0005488%2C GO:0016567
OE9A091063	31.4333	-3.90656	0.899084	-4.34504	1.3925e-05	0.000458487	OE9A091063	ID=OE9A091063T1;Parent=OE9A091063;Name=OE9A091063T1;product=OE9A091063P1;Description=Mediator of RNA polymerase II transcription subunit 18,;Ontology_term=GO:0016020
OE9A000364	76.7704	-3.86102	0.538451	-7.17061	7.4663e-13	1.08809e-10	OE9A000364	ID=OE9A000364T1;Parent=OE9A000364;Name=OE9A000364T1;product=OE9A000364P1;Description=lignin-forming anionic peroxidase;Ontology_term=GO:0004601%2C GO:0005576%2C GO:0006804%2C GO:0006979%2C GO:0020037%2C GO:0042744%2C GO:0046872%2C GO:0055114%2C GO:0098869
OE9A023580	3247.7	-3.85895	0.483683	-7.97827	1.48401e-15	3.92405e-13	OE9A023580	ID=OE9A023580T1;Parent=OE9A023580;Name=OE9A023580T1;product=OE9A023580P1;Description=probable calcium-binding CML45;Ontology_term=GO:0005509
OE9A045301	3552.96	-3.85042	0.534191	-7.20795	5.67984e-13	8.42094e-11	OE9A045301	ID=OE9A045301T1;Parent=OE9A045301;Name=OE9A045301T1;product=OE9A045301P1;Description=ethylene-responsive transcription factor 4-like;Ontology_term=GO:0003677%2C GO:0003700%2C GO:0005667%2C GO:0006355%2C GO:0045449
OE9A084330	391.057	-3.8494	0.553594	-6.95347	3.56407e-12	4.73652e-10	OE9A084330	ID=OE9A084330T1;Parent=OE9A084330;Name=OE9A084330T1;product=OE9A084330P1;Description=ethylene-responsive transcription factor 5-like;Ontology_term=GO:0003677%2C GO:0003700%2C GO:0005667%2C GO:0006355%2C GO:0045449
OE9A066307	2983.27	-3.84685	0.522422	-7.36349	1.79161e-13	3.04055e-11	OE9A066307	ID=OE9A066307T1;Parent=OE9A066307;Name=OE9A066307T1;product=OE9A066307P1;Description=ethylene-responsive transcription factor 4-like;Ontology_term=GO:0003677%2C GO:0003700%2C GO:0005667%2C GO:0006355%2C GO:0045449
OE9A079404	144.915	-3.84225	0.588749	-6.52612	6.74937e-11	6.95239e-09	OE9A079404	ID=OE9A079404T1;Parent=OE9A079404;Name=OE9A079404T1;product=OE9A079404P1;Description=mitogen-activated kinase kinase kinase 3-like;Ontology_term=GO:0004672%2C GO:0005524%2C GO:0006468
OE9A051260	4.32717	-3.83303	1.50412	-2.54835	0.0108235	0.0866454	OE9A051260	ID=OE9A051260T1;Parent=OE9A051260;Name=OE9A051260T1;product=OE9A051260P1;Description=glutamate decarboxylase-like;Ontology_term=GO:0016831%2C GO:0019752%2C GO:0030170
OE9A096223	70.2808	-3.82481	0.711818	-5.3733	7.73096e-08	4.48623e-06	OE9A096223	ID=OE9A096223T1;Parent=OE9A096223;Name=OE9A096223T1;product=OE9A096223P1;Description=ethylene-responsive transcription factor ERF017-like;Ontology_term=GO:0003677%2C GO:0003700%2C GO:0005667%2C GO:0006355%2C GO:0045449
OE9A009435	496.739	-3.82311	0.7709	-4.95928	7.07534e-07	3.31765e-05	OE9A009435	ID=OE9A009435T1;Parent=OE9A009435;Name=OE9A009435T1;product=OE9A009435P1;Description=auxin-responsive SAUR36-like;Ontology_term=GO:0009733
OE9A013995	145.872	-3.81378	0.547663	-6.96372	3.31398e-12	4.45027e-10	OE9A013995	ID=OE9A013995T1;Parent=OE9A013995;Name=OE9A013995T1;product=OE9A013995P1;Description=mitogen-activated kinase kinase kinase 3-like;Ontology_term=GO:0004672%2C GO:0005524%2C GO:0006468
OE9A045524	9.93171	-3.80681	1.10642	-3.44067	0.000580273	0.0100768	OE9A045524	ID=OE9A045524T1;Parent=OE9A045524;Name=OE9A045524T1;product=OE9A045524P1;Description=xyloglucan endotransglucosylase hydrolase 2-like;Ontology_term=GO:0004553%2C GO:0005618%2C GO:0010411%2C GO:0016762%2C GO:0042546%2C GO:0048046
OE9A107194	78.8644	-3.79197	0.705877	-5.37201	7.78655e-08	4.50829e-06	OE9A107194	ID=OE9A107194T1;Parent=OE9A107194;Name=OE9A107194T1;product=OE9A107194P1
OE9A058655	4224.07	-3.77221	0.441555	-8.543	1.30783e-17	4.93302e-15	OE9A058655	ID=OE9A058655T1;Parent=OE9A058655;Name=OE9A058655T1;product=OE9A058655P1;Description=probable calcium-binding CML45;Ontology_term=GO:0005509
OE9A118979	6.82975	-3.76928	1.14611	-3.28875	0.00100633	0.0155396	OE9A118979	ID=OE9A118979T1;Parent=OE9A118979;Name=OE9A118979T1;product=OE9A118979P1
OE9A041554	38.9918	-3.76452	0.881615	-4.27002	1.95454e-05	0.00060988	OE9A041554	ID=OE9A041554T1;Parent=OE9A041554;Name=OE9A041554T1;product=OE9A041554P1;Description=myb-related Myb4-like;Ontology_term=GO:0003677
OE9A011505	873.65	-3.75178	0.542754	-6.91248	4.76269e-12	6.10791e-10	OE9A011505	ID=OE9A011505T1;Parent=OE9A011505;Name=OE9A011505T1;product=OE9A011505P1
OE9A004162	148.906	-3.74814	0.661376	-5.66718	1.45165e-08	9.69621e-07	OE9A004162	ID=OE9A004162T2;Parent=OE9A004162;Name=OE9A004162T2;product=OE9A004162P1;Description=probable WRKY transcription factor 23;Ontology_term=GO:0003700%2C GO:0005667%2C GO:0006355%2C GO:0043565%2C GO:0045449
OE9A022845	122.375	-3.74144	0.684564	-5.46543	4.61781e-08	2.82678e-06	OE9A022845	ID=OE9A022845T1;Parent=OE9A022845;Name=OE9A022845T1;product=OE9A022845P1
OE9A082695	17.6575	-3.73183	0.792104	-4.71129	2.46155e-06	0.000103254	OE9A082695	ID=OE9A082695T1;Parent=OE9A082695;Name=OE9A082695T1;product=OE9A082695P1;Description=RHOMBOID 2;Ontology_term=GO:0004252%2C GO:0016021%2C GO:0016485
OE9A068868	12.1623	-3.72809	1.30459	-2.85767	0.0042677	0.0452697	OE9A068868	ID=OE9A068868T1;Parent=OE9A068868;Name=OE9A068868T1;product=OE9A068868P1
OE9A010897	35.4819	-3.71604	0.647601	-5.73816	9.57092e-09	6.58136e-07	OE9A010897	ID=OE9A010897T1;Parent=OE9A010897;Name=OE9A010897T1;product=OE9A010897P1;Description=NDR1 HIN1 13;Ontology_term=GO:0016020
OE9A073838	9.52744	-3.70871	1.38157	-2.68443	0.00726542	0.0658176	OE9A073838	ID=OE9A073838T1;Parent=OE9A073838;Name=OE9A073838T1;product=OE9A073838P1;Description=ethylene-responsive transcription factor ERF027-like;Ontology_term=GO:0003677%2C GO:0003700%2C GO:0005667%2C GO:0006355%2C GO:0045449
OE9A004806	68.6388	-3.69174	0.701636	-5.26161	1.42796e-07	7.8596e-06	OE9A004806	ID=OE9A004806T1;Parent=OE9A004806;Name=OE9A004806T1;product=OE9A004806P1
OE9A038167	22.3028	-3.69072	0.914843	-4.03427	5.47727e-05	0.00144682	OE9A038167	ID=OE9A038167T1;Parent=OE9A038167;Name=OE9A038167T1;product=OE9A038167P1;Description=secoisolariciresinol dehydrogenase-like;Ontology_term=GO:0016491
OE9A060709	62.0188	-3.68944	0.637946	-5.78331	7.32456e-09	5.18972e-07	OE9A060709	ID=OE9A060709T1;Parent=OE9A060709;Name=OE9A060709T1;product=OE9A060709P1
OE9A081102	4.86684	-3.67312	1.44828	-2.53619	0.0112064	0.0883324	OE9A081102	ID=OE9A081102T1;Parent=OE9A081102;Name=OE9A081102T1;product=OE9A081102P1;Description=leucoanthocyanidin dioxygenase;Ontology_term=GO:0009718%2C GO:0031418%2C GO:0046872%2C GO:0050589%2C GO:0055114
OE9A038398	4473.13	-3.65038	0.589625	-6.19102	5.97773e-10	5.26882e-08	OE9A038398	ID=OE9A038398T1;Parent=OE9A038398;Name=OE9A038398T1;product=OE9A038398P1;Description=SENESCENCE-ASSOCIATED GENE 21, mitochondrial-like;Ontology_term=GO:0006950
OE9A105623	151.505	-3.63702	0.522936	-6.95501	3.52547e-12	4.70963e-10	OE9A105623	ID=OE9A105623T1;Parent=OE9A105623;Name=OE9A105623T1;product=OE9A105623P1;Description=probable CCR4-associated factor 1 homolog 11;Ontology_term=GO:0000175%2C GO:0000288%2C GO:0003676%2C GO:0005634%2C GO:0030014%2C GO:0051252
OE9A033158	339.23	-3.63524	0.482241	-7.53822	4.76429e-14	8.72853e-12	OE9A033158	ID=OE9A033158T1;Parent=OE9A033158;Name=OE9A033158T1;product=OE9A033158P1
OE9A106589	195.279	-3.62105	0.44373	-8.16049	3.3367e-16	1.00686e-13	OE9A106589	ID=OE9A106589T1;Parent=OE9A106589;Name=OE9A106589T1;product=OE9A106589P1
OE9A002858	1580.37	-3.61294	0.40278	-8.97002	2.9646e-19	1.81046e-16	OE9A002858	ID=OE9A002858T1;Parent=OE9A002858;Name=OE9A002858T1;product=OE9A002858P1;Description=UDP-glucose 6-dehydrogenase 2-like;Ontology_term=GO:0003979%2C GO:0005982%2C GO:0005985%2C GO:0009117%2C GO:0051287%2C GO:0055114
OE9A064672	50.6106	-3.60111	0.545128	-6.60599	3.94863e-11	4.23759e-09	OE9A064672	ID=OE9A064672T1;Parent=OE9A064672;Name=OE9A064672T1;product=OE9A064672P1;Description=C2-DOMAIN ABA-RELATED 4-like;Ontology_term=GO:0005515
OE9A114645	6738.69	-3.59528	0.378628	-9.49555	2.19046e-21	2.00654e-18	OE9A114645	ID=OE9A114645T1;Parent=OE9A114645;Name=OE9A114645T1;product=OE9A114645P1;Description=ethylene-responsive transcription factor 4;Ontology_term=GO:0003677%2C GO:0003700%2C GO:0005667%2C GO:0006355%2C GO:0045449
OE9A061095	6.69879	-3.59191	1.00202	-3.58465	0.000337532	0.00649464	OE9A061095	ID=OE9A061095T1;Parent=OE9A061095;Name=OE9A061095T1;product=OE9A061095P1;Description=NAC domain-containing 62-like;Ontology_term=GO:0003677%2C GO:0006355
OE9A021640	8.81376	-3.56515	1.1924	-2.98989	0.00279077	0.0330321	OE9A021640	ID=OE9A021640T1;Parent=OE9A021640;Name=OE9A021640T1;product=OE9A021640P1;Description=cation calcium exchanger 1-like;Ontology_term=GO:0016021%2C GO:0055085
OE9A014923	2584.17	-3.5552	0.556544	-6.388	1.68071e-10	1.6345e-08	OE9A014923	ID=OE9A014923T1;Parent=OE9A014923;Name=OE9A014923T1;product=OE9A014923P1;Description=RING-H2 finger ATL2-like;Ontology_term=GO:0005515%2C GO:0008270%2C GO:0016020
OE9A069927	1014.21	-3.52427	0.367564	-9.58818	8.96491e-22	1.01599e-18	OE9A069927	ID=OE9A069927T1;Parent=OE9A069927;Name=OE9A069927T1;product=OE9A069927P1
OE9A065931	104.384	-3.5186	0.48028	-7.32614	2.36873e-13	3.86978e-11	OE9A065931	ID=OE9A065931T1;Parent=OE9A065931;Name=OE9A065931T1;product=OE9A065931P1;Description=Mediator of RNA polymerase II transcription subunit 18,;Ontology_term=GO:0016020
OE9A120192	234.036	-3.50423	0.481469	-7.27821	3.38285e-13	5.32311e-11	OE9A120192	ID=OE9A120192T1;Parent=OE9A120192;Name=OE9A120192T1;product=OE9A120192P1
OE9A023040	142.592	-3.50102	0.654998	-5.34509	9.03744e-08	5.17413e-06	OE9A023040	ID=OE9A023040T1;Parent=OE9A023040;Name=OE9A023040T1;product=OE9A023040P1;Description=Mediator of RNA polymerase II transcription subunit 18,;Ontology_term=GO:0016021
OE9A065734	1102.53	-3.49408	0.422336	-8.27322	1.30393e-16	4.18057e-14	OE9A065734	ID=OE9A065734T1;Parent=OE9A065734;Name=OE9A065734T1;product=OE9A065734P1;Description=RING-H2 finger ATL3-like;Ontology_term=GO:0005515%2C GO:0008270%2C GO:0044267
OE9A075065	2878	-3.45442	0.372716	-9.26825	1.89232e-20	1.47079e-17	OE9A075065	ID=OE9A075065T1;Parent=OE9A075065;Name=OE9A075065T1;product=OE9A075065P1;Description=SRC2 homolog, partial;Ontology_term=GO:0005515
OE9A037314	441.304	-3.44797	0.576976	-5.97594	2.28772e-09	1.7731e-07	OE9A037314	ID=OE9A037314T1;Parent=OE9A037314;Name=OE9A037314T1;product=OE9A037314P1;Description=mitogen-activated kinase kinase kinase NPK1-like;Ontology_term=GO:0004672%2C GO:0005524%2C GO:0006468
OE9A009930	5.62845	-3.4451	1.28458	-2.68189	0.00732076	0.0661162	OE9A009930	ID=OE9A009930T1;Parent=OE9A009930;Name=OE9A009930T1;product=OE9A009930P1;Description=dehydration-responsive element-binding 1E-like;Ontology_term=GO:0003677%2C GO:0003700%2C GO:0005634%2C GO:0005667%2C GO:0006355%2C GO:0045449
OE9A113289	934.073	-3.42007	0.540771	-6.32443	2.54177e-10	2.40568e-08	OE9A113289	ID=OE9A113289T1;Parent=OE9A113289;Name=OE9A113289T1;product=OE9A113289P1;Description=probable E3 ubiquitin- ligase XERICO;Ontology_term=GO:0005515%2C GO:0008270%2C GO:0016020
OE9A097645	2927.56	-3.41833	0.585337	-5.83992	5.22244e-09	3.76265e-07	OE9A097645	ID=OE9A097645T1;Parent=OE9A097645;Name=OE9A097645T1;product=OE9A097645P1;Description=probable WRKY transcription factor 33;Ontology_term=GO:0003700%2C GO:0005667%2C GO:0006355%2C GO:0043565%2C GO:0045449
OE9A028561	9.81175	-3.4171	0.956242	-3.57347	0.000352286	0.00669318	OE9A028561	ID=OE9A028561T1;Parent=OE9A028561;Name=OE9A028561T1;product=OE9A028561P1;Description=mitogen-activated kinase kinase kinase YODA-like;Ontology_term=GO:0004672%2C GO:0005524%2C GO:0006468
OE9A008777	2868.84	-3.40817	0.421788	-8.08029	6.46131e-16	1.80333e-13	OE9A008777	ID=OE9A008777T1;Parent=OE9A008777;Name=OE9A008777T1;product=OE9A008777P1;Description=heavy metal-associated isoprenylated plant 3-like;Ontology_term=GO:0030001%2C GO:0046872
OE9A056651	2267.75	-3.39812	0.599548	-5.66781	1.44637e-08	9.68614e-07	OE9A056651	ID=OE9A056651T1;Parent=OE9A056651;Name=OE9A056651T1;product=OE9A056651P1;Description=probable WRKY transcription factor 33;Ontology_term=GO:0003700%2C GO:0005667%2C GO:0006355%2C GO:0043565%2C GO:0045449
OE9A052899	5.94812	-3.39791	1.08161	-3.14152	0.00168074	0.0228212	OE9A052899	ID=OE9A052899T1;Parent=OE9A052899;Name=OE9A052899T1;product=OE9A052899P1;Description=disulfide-isomerase-like;Ontology_term=GO:0003756%2C GO:0005783%2C GO:0006457%2C GO:0034976%2C GO:0045454
OE9A032354	3353.25	-3.38402	0.418875	-8.07884	6.53865e-16	1.80333e-13	OE9A032354	ID=OE9A032354T1;Parent=OE9A032354;Name=OE9A032354T1;product=OE9A032354P1;Description=heavy metal-associated isoprenylated plant 3-like;Ontology_term=GO:0030001%2C GO:0046872
OE9A003203	18.8029	-3.37218	0.769146	-4.38431	1.16352e-05	0.000391277	OE9A003203	ID=OE9A003203T1;Parent=OE9A003203;Name=OE9A003203T1;product=OE9A003203P1;Description=calcium uniporter 5, mitochondrial-like;Ontology_term=GO:0006810%2C GO:0015292%2C GO:0016021
OE9A078448	18.914	-3.35388	0.758712	-4.42048	9.84809e-06	0.000341805	OE9A078448	ID=OE9A078448T1;Parent=OE9A078448;Name=OE9A078448T1;product=OE9A078448P1;Description=GATA transcription factor 8-like;Ontology_term=GO:0000785%2C GO:0000977%2C GO:0001085%2C GO:0001228%2C GO:0003682%2C GO:0005634%2C GO:0005667%2C GO:0008270%2C GO:0030154%2C GO:0045893
OE9A016113	31.1874	-3.32452	0.887514	-3.74588	0.000179763	0.00385191	OE9A016113	ID=OE9A016113T1;Parent=OE9A016113;Name=OE9A016113T1;product=OE9A016113P1;Description=poly polymerase;Ontology_term=GO:0005730
OE9A050716	6.40486	-3.30808	1.16768	-2.83305	0.00461066	0.0477813	OE9A050716	ID=OE9A050716T1;Parent=OE9A050716;Name=OE9A050716T1;product=OE9A050716P1;md5=cb85e09455a1b5bcdf60abb476e08beb;INTERPRO=<table><tr><th>DB</th><th>ID</th><th>Description</th></tr><tr><td>PANTHER</td><td>PTHR14493</td><td></td></tr><tr><td>PANTHER</td><td>PTHR14493:SF53</td><td></td></tr></table>;Description=Zinc finger CCCH domain-containing protein 2
OE9A021431	8401.68	-3.30379	0.354055	-9.3313	1.0458e-20	8.38241e-18	OE9A021431	ID=OE9A021431T1;Parent=OE9A021431;Name=OE9A021431T1;product=OE9A021431P1;Description=zinc finger CCCH domain-containing 29-like;Ontology_term=GO:0005515%2C GO:0046872
OE9A000795	15.9421	-3.2969	0.798338	-4.1297	3.63236e-05	0.00103633	OE9A000795	ID=OE9A000795T1;Parent=OE9A000795;Name=OE9A000795T1;product=OE9A000795P1;Description=GATA transcription factor 8-like;Ontology_term=GO:0000785%2C GO:0000977%2C GO:0001085%2C GO:0001228%2C GO:0003682%2C GO:0005634%2C GO:0005667%2C GO:0008270%2C GO:0030154%2C GO:0045893
OE9A046042	90.2374	-3.27657	0.633442	-5.17264	2.30812e-07	1.22823e-05	OE9A046042	ID=OE9A046042T1;Parent=OE9A046042;Name=OE9A046042T1;product=OE9A046042P1;Description=ethylene-responsive transcription factor ERF027-like;Ontology_term=GO:0003677%2C GO:0003700%2C GO:0005667%2C GO:0006355%2C GO:0045449
OE9A043355	3021.67	-3.27062	0.380016	-8.60654	7.53015e-18	3.11518e-15	OE9A043355	ID=OE9A043355T1;Parent=OE9A043355;Name=OE9A043355T1;product=OE9A043355P1
OE9A074891	977.337	-3.26979	0.426162	-7.67263	1.68502e-14	3.4301e-12	OE9A074891	ID=OE9A074891T1;Parent=OE9A074891;Name=OE9A074891T1;product=OE9A074891P1;Description=CBL-interacting serine threonine- kinase 14-like;Ontology_term=GO:0004674%2C GO:0005524%2C GO:0006468%2C GO:0007165%2C GO:0009069
OE9A102076	4.83998	-3.26599	1.31266	-2.48808	0.0128436	0.0972339	OE9A102076	ID=OE9A102076T1;Parent=OE9A102076;Name=OE9A102076T1;product=OE9A102076P1;Description=exocyst complex component EXO70H1-like;Ontology_term=GO:0000145%2C GO:0006887
OE9A055375	13.3242	-3.25429	0.846248	-3.84555	0.00012028	0.00281999	OE9A055375	ID=OE9A055375T1;Parent=OE9A055375;Name=OE9A055375T1;product=OE9A055375P1;Description=zinc finger ZAT10-like;Ontology_term=GO:0003676%2C GO:0046872
OE9A074244	12.8791	-3.2503	1.27892	-2.54145	0.0110394	0.0876271	OE9A074244	ID=OE9A074244T1;Parent=OE9A074244;Name=OE9A074244T1;product=OE9A074244P1;Description=cannabidiolic acid synthase-like;Ontology_term=GO:0016614%2C GO:0050660%2C GO:0055114
OE9A106917	12.6383	-3.24122	0.860547	-3.76647	0.000165573	0.00361258	OE9A106917	ID=OE9A106917T1;Parent=OE9A106917;Name=OE9A106917T1;product=OE9A106917P1
OE9A006330	165.037	-3.23032	0.274959	-11.7484	7.20032e-32	9.23406e-28	OE9A006330	ID=OE9A006330T1;Parent=OE9A006330;Name=OE9A006330T1;product=OE9A006330P1;Description=calmodulin 3;Ontology_term=GO:0005509
OE9A043154	5435.36	-3.22794	0.367732	-8.77795	1.66475e-18	8.71413e-16	OE9A043154	ID=OE9A043154T1;Parent=OE9A043154;Name=OE9A043154T1;product=OE9A043154P1;Description=zinc finger CCCH domain-containing 29-like;Ontology_term=GO:0005515%2C GO:0046872
OE9A120487	804.553	-3.22291	0.436736	-7.37956	1.58817e-13	2.71567e-11	OE9A120487	ID=OE9A120487T1;Parent=OE9A120487;Name=OE9A120487T1;product=OE9A120487P1;Description=syntaxin-121-like;Ontology_term=GO:0000149%2C GO:0005484%2C GO:0005886%2C GO:0006886%2C GO:0006887%2C GO:0006906%2C GO:0012505%2C GO:0016021%2C GO:0031201%2C GO:0048278
OE9A040726	6757.18	-3.22095	0.414492	-7.77084	7.79677e-15	1.7542e-12	OE9A040726	ID=OE9A040726T1;Parent=OE9A040726;Name=OE9A040726T1;product=OE9A040726P1;Description=zinc finger ZAT10-like;Ontology_term=GO:0046872
OE9A015761	9.7851	-3.21714	1.16783	-2.7548	0.00587282	0.0570425	OE9A015761	ID=OE9A015761T1;Parent=OE9A015761;Name=OE9A015761T1;product=OE9A015761P1;Description=secoisolariciresinol dehydrogenase-like;Ontology_term=GO:0016491
OE9A063822	879.644	-3.21197	0.423396	-7.5862	3.29436e-14	6.12418e-12	OE9A063822	ID=OE9A063822T1;Parent=OE9A063822;Name=OE9A063822T1;product=OE9A063822P1;Description=CBL-interacting serine threonine- kinase 14-like;Ontology_term=GO:0004674%2C GO:0005524%2C GO:0006468%2C GO:0007165%2C GO:0009069
OE9A094681	1491.25	-3.19661	0.418469	-7.63882	2.19227e-14	4.32534e-12	OE9A094681	ID=OE9A094681T1;Parent=OE9A094681;Name=OE9A094681T1;product=OE9A094681P1
OE9A057874	155.21	-3.17593	0.382567	-8.30164	1.02681e-16	3.33375e-14	OE9A057874	ID=OE9A057874T1;Parent=OE9A057874;Name=OE9A057874T1;product=OE9A057874P1;Description=SRC2-like;Ontology_term=GO:0005515
OE9A110626	3425.59	-3.1672	0.359243	-8.81633	1.18275e-18	6.45452e-16	OE9A110626	ID=OE9A110626T1;Parent=OE9A110626;Name=OE9A110626T1;product=OE9A110626P1;Description=unnamed protein product;Ontology_term=GO:0016021
OE9A103543	331.328	-3.16223	0.415685	-7.60727	2.79937e-14	5.35829e-12	OE9A103543	ID=OE9A103543T1;Parent=OE9A103543;Name=OE9A103543T1;product=OE9A103543P1
OE9A042937	7457.72	-3.16197	0.363991	-8.68694	3.72322e-18	1.76846e-15	OE9A042937	ID=OE9A042937T1;Parent=OE9A042937;Name=OE9A042937T1;product=OE9A042937P1;Description=zinc finger CCCH domain-containing 29-like;Ontology_term=GO:0005515%2C GO:0046872
OE9A028834	4.93271	-3.16171	1.15626	-2.73444	0.00624863	0.0592718	OE9A028834	ID=OE9A028834T1;Parent=OE9A028834;Name=OE9A028834T1;product=OE9A028834P1;Description=aquaporin TIP1-3;Ontology_term=GO:0005887%2C GO:0006833%2C GO:0009705%2C GO:0009992%2C GO:0015250%2C GO:0015254%2C GO:0015793%2C GO:0034220%2C GO:0042807
OE9A050124	4.9569	-3.15019	1.23832	-2.54392	0.0109617	0.0873291	OE9A050124	ID=OE9A050124T1;Parent=OE9A050124;Name=OE9A050124T1;product=OE9A050124P1;Description=GDSL esterase lipase At1g09390-like;Ontology_term=GO:0016021%2C GO:0016788
OE9A051863	353.549	-3.14918	0.603769	-5.21587	1.82957e-07	9.85852e-06	OE9A051863	ID=OE9A051863T1;Parent=OE9A051863;Name=OE9A051863T1;product=OE9A051863P1;Description=calcium-binding PBP1-like;Ontology_term=GO:0005509
OE9A098762	799.934	-3.13514	0.317831	-9.86418	5.95174e-23	8.03454e-20	OE9A098762	ID=OE9A098762T1;Parent=OE9A098762;Name=OE9A098762T1;product=OE9A098762P1;Description=probable CCR4-associated factor 1 homolog 11;Ontology_term=GO:0000289%2C GO:0003676%2C GO:0004535%2C GO:0005634%2C GO:0016740%2C GO:0030014%2C GO:0051252%2C GO:0090503
OE9A025047	184	-3.13424	0.630262	-4.97292	6.59524e-07	3.09819e-05	OE9A025047	ID=OE9A025047T1;Parent=OE9A025047;Name=OE9A025047T1;product=OE9A025047P1
OE9A116623	22.7408	-3.1203	0.819311	-3.80845	0.00013984	0.00317333	OE9A116623	ID=OE9A116623T1;Parent=OE9A116623;Name=OE9A116623T1;product=OE9A116623P1;Description=7-deoxyloganetic acid UDP-glucosyltransferase;Ontology_term=GO:0035251%2C GO:1900994
OE9A087855	1999.2	-3.11486	0.638679	-4.87704	1.0769e-06	4.8801e-05	OE9A087855	ID=OE9A087855T1;Parent=OE9A087855;Name=OE9A087855T1;product=OE9A087855P1;Description=zinc finger ZAT10-like;Ontology_term=GO:0003700%2C GO:0005634%2C GO:0005667%2C GO:0043565%2C GO:0044212%2C GO:0045449%2C GO:0046872
OE9A074593	210.537	-3.10845	0.429073	-7.24457	4.33812e-13	6.62312e-11	OE9A074593	ID=OE9A074593T1;Parent=OE9A074593;Name=OE9A074593T1;product=OE9A074593P1;Description=uncharacterized protein LOC111373047;Ontology_term=GO:0016021
OE9A107039	1076.16	-3.10425	0.356295	-8.71259	2.97015e-18	1.43738e-15	OE9A107039	ID=OE9A107039T1;Parent=OE9A107039;Name=OE9A107039T1;product=OE9A107039P1
OE9A050117	36.5509	-3.10161	0.514602	-6.02721	1.66811e-09	1.34545e-07	OE9A050117	ID=OE9A050117T1;Parent=OE9A050117;Name=OE9A050117T1;product=OE9A050117P1
OE9A047752	10.6095	-3.10094	0.871076	-3.55989	0.000371004	0.00699485	OE9A047752	ID=OE9A047752T1;Parent=OE9A047752;Name=OE9A047752T1;product=OE9A047752P1
OE9A119978	7549.43	-3.10016	0.36372	-8.52349	1.54822e-17	5.75513e-15	OE9A119978	ID=OE9A119978T1;Parent=OE9A119978;Name=OE9A119978T1;product=OE9A119978P1;Description=ethylene-responsive transcription factor 5-like;Ontology_term=GO:0003677%2C GO:0003700%2C GO:0005667%2C GO:0006355%2C GO:0045449
OE9A056979	306.622	-3.09058	0.46692	-6.61908	3.61448e-11	3.89528e-09	OE9A056979	ID=OE9A056979T1;Parent=OE9A056979;Name=OE9A056979T1;product=OE9A056979P1;Description=serine threonine- kinase STY46;Ontology_term=GO:0004674%2C GO:0005524%2C GO:0006468%2C GO:0009069%2C GO:0009734%2C GO:0009742%2C GO:0010305
OE9A112876	168.033	-3.08037	0.84056	-3.66466	0.000247663	0.00503353	OE9A112876	ID=OE9A112876T1;Parent=OE9A112876;Name=OE9A112876T1;product=OE9A112876P1;Description=chitinase 10;Ontology_term=GO:0004568%2C GO:0005975%2C GO:0006032%2C GO:0016021%2C GO:0016998
OE9A091582	5.18277	-3.07635	1.21006	-2.54231	0.0110123	0.0875018	OE9A091582	ID=OE9A091582T1;Parent=OE9A091582;Name=OE9A091582T1;product=OE9A091582P1;Description=U-box domain-containing 4-like;Ontology_term=GO:0005515%2C GO:0005634%2C GO:0005737
OE9A099408	8.70918	-3.06107	1.08847	-2.81228	0.00491917	0.0501478	OE9A099408	ID=OE9A099408T1;Parent=OE9A099408;Name=OE9A099408T1;product=OE9A099408P1;Description=GLUTAMINE DUMPER 4-like;Ontology_term=GO:0016020
OE9A118237	12.7698	-3.04679	1.14869	-2.65241	0.00799188	0.0699096	OE9A118237	ID=OE9A118237T1;Parent=OE9A118237;Name=OE9A118237T1;product=OE9A118237P1
OE9A023170	17.0676	-3.04496	0.938719	-3.24374	0.0011797	0.0175307	OE9A023170	ID=OE9A023170T1;Parent=OE9A023170;Name=OE9A023170T1;product=OE9A023170P1;Description=Serine threonine kinase;Ontology_term=GO:0004674%2C GO:0005524%2C GO:0005886%2C GO:0006468%2C GO:0009069
OE9A087360	1173.17	-3.03337	0.354221	-8.56349	1.09503e-17	4.25553e-15	OE9A087360	ID=OE9A087360T1;Parent=OE9A087360;Name=OE9A087360T1;product=OE9A087360P1;Description=glucan endo-1,3-beta-glucosidase-like;Ontology_term=GO:0004553%2C GO:0005975
OE9A003051	3721.97	-3.02461	0.352316	-8.58495	9.08745e-18	3.64194e-15	OE9A003051	ID=OE9A003051T1;Parent=OE9A003051;Name=OE9A003051T1;product=OE9A003051P1
OE9A003448	87.8102	-3.02203	0.63193	-4.78222	1.73372e-06	7.4611e-05	OE9A003448	ID=OE9A003448T1;Parent=OE9A003448;Name=OE9A003448T1;product=OE9A003448P1
OE9A103265	1489.28	-3.018	0.350974	-8.59893	8.04645e-18	3.27593e-15	OE9A103265	ID=OE9A103265T1;Parent=OE9A103265;Name=OE9A103265T1;product=OE9A103265P1;Description=probable calcium-binding CML45;Ontology_term=GO:0005509
OE9A006276	3565.85	-3.01427	0.376145	-8.01357	1.11423e-15	3.04032e-13	OE9A006276	ID=OE9A006276T1;Parent=OE9A006276;Name=OE9A006276T1;product=OE9A006276P1;Description=calcium-binding CML42;Ontology_term=GO:0005509
OE9A039163	680.735	-3.01413	0.391762	-7.69378	1.42849e-14	2.95478e-12	OE9A039163	ID=OE9A039163T1;Parent=OE9A039163;Name=OE9A039163T1;product=OE9A039163P1;Description=F-box At4g18380-like;Ontology_term=GO:0005515
OE9A008626	41.3084	-2.99664	0.819746	-3.65557	0.000256612	0.00517034	OE9A008626	ID=OE9A008626T1;Parent=OE9A008626;Name=OE9A008626T1;product=OE9A008626P1;Description=elicitor-responsive 1-like;Ontology_term=GO:0005515
OE9A099186	597.075	-2.99505	0.61582	-4.86352	1.15316e-06	5.18903e-05	OE9A099186	ID=OE9A099186T1;Parent=OE9A099186;Name=OE9A099186T1;product=OE9A099186P1;Description=zinc finger ZAT10-like;Ontology_term=GO:0003676%2C GO:0046872
OE9A039679	135.159	-2.98666	0.568764	-5.25114	1.51164e-07	8.26694e-06	OE9A039679	ID=OE9A039679T1;Parent=OE9A039679;Name=OE9A039679T1;product=OE9A039679P1
OE9A098891	153.948	-2.98404	0.452737	-6.5911	4.3657e-11	4.66566e-09	OE9A098891	ID=OE9A098891T1;Parent=OE9A098891;Name=OE9A098891T1;product=OE9A098891P1
OE9A078302	575.895	-2.98036	0.381919	-7.80364	6.01445e-15	1.36517e-12	OE9A078302	ID=OE9A078302T1;Parent=OE9A078302;Name=OE9A078302T1;product=OE9A078302P1;Description=purple acid phosphatase 22-like;Ontology_term=GO:0003993%2C GO:0006771%2C GO:0016311%2C GO:0019497%2C GO:0046872
OE9A104782	1819.96	-2.97231	0.325902	-9.12028	7.49318e-20	5.49121e-17	OE9A104782	ID=OE9A104782T1;Parent=OE9A104782;Name=OE9A104782T1;product=OE9A104782P1;Description=expansin-like A2;Ontology_term=GO:0005576%2C GO:0009505%2C GO:0009506%2C GO:0016020%2C GO:0019953
OE9A077596	554.278	-2.95847	0.342195	-8.64556	5.35401e-18	2.36767e-15	OE9A077596	ID=OE9A077596T1;Parent=OE9A077596;Name=OE9A077596T1;product=OE9A077596P1;Description=probable CCR4-associated factor 1 homolog 11;Ontology_term=GO:0000289%2C GO:0003676%2C GO:0004535%2C GO:0005634%2C GO:0016740%2C GO:0030014%2C GO:0051252%2C GO:0090503
OE9A117718	293.381	-2.95013	0.40294	-7.3215	2.45206e-13	3.98057e-11	OE9A117718	ID=OE9A117718T1;Parent=OE9A117718;Name=OE9A117718T1;product=OE9A117718P1;Description=poly polymerase;Ontology_term=GO:0005730
OE9A103755	1408.08	-2.94451	0.348046	-8.4601	2.67144e-17	9.51665e-15	OE9A103755	ID=OE9A103755T1;Parent=OE9A103755;Name=OE9A103755T1;product=OE9A103755P1;Description=ethylene-responsive transcription factor 5-like;Ontology_term=GO:0003677%2C GO:0003700%2C GO:0005667%2C GO:0006355%2C GO:0045449
OE9A025113	4.58919	-2.93494	1.09994	-2.66826	0.00762449	0.0678794	OE9A025113	ID=OE9A025113T1;Parent=OE9A025113;Name=OE9A025113T1;product=OE9A025113P1
OE9A086962	28.881	-2.93385	0.917728	-3.19687	0.0013893	0.0197251	OE9A086962	ID=OE9A086962T1;Parent=OE9A086962;Name=OE9A086962T1;product=OE9A086962P1;Description=WRKY transcription factor 22-like;Ontology_term=GO:0003700%2C GO:0005667%2C GO:0006355%2C GO:0043565%2C GO:0045449
OE9A021502	6.75518	-2.92204	1.16211	-2.51444	0.0119222	0.0919954	OE9A021502	ID=OE9A021502T1;Parent=OE9A021502;Name=OE9A021502T1;product=OE9A021502P1
OE9A101335	53.4451	-2.92126	1.00948	-2.89382	0.00380586	0.041516	OE9A101335	ID=OE9A101335T1;Parent=OE9A101335;Name=OE9A101335T1;product=OE9A101335P1;Description=E3 ubiquitin- ligase PUB23-like;Ontology_term=GO:0004842%2C GO:0005488%2C GO:0016567
OE9A072034	124.75	-2.91627	0.393436	-7.41231	1.24118e-13	2.16564e-11	OE9A072034	ID=OE9A072034T1;Parent=OE9A072034;Name=OE9A072034T1;product=OE9A072034P1;Description=U-box domain-containing 17;Ontology_term=GO:0004842%2C GO:0005634%2C GO:0005737%2C GO:0009814%2C GO:0016567
OE9A001198	412.39	-2.9097	0.399121	-7.29025	3.09381e-13	4.92877e-11	OE9A001198	ID=OE9A001198T1;Parent=OE9A001198;Name=OE9A001198T1;product=OE9A001198P1;Description=beta-amylase 3, chloroplastic;Ontology_term=GO:0000272%2C GO:0005982%2C GO:0005985%2C GO:0016161
OE9A038526	365.227	-2.89533	0.425955	-6.79726	1.06628e-11	1.27799e-09	OE9A038526	ID=OE9A038526T1;Parent=OE9A038526;Name=OE9A038526T1;product=OE9A038526P1
OE9A104316	3814.81	-2.89155	0.364605	-7.93063	2.18035e-15	5.42949e-13	OE9A104316	ID=OE9A104316T1;Parent=OE9A104316;Name=OE9A104316T1;product=OE9A104316P1;Description=scarecrow 13;Ontology_term=GO:0003700%2C GO:0005634%2C GO:0005667%2C GO:0006355%2C GO:0043565%2C GO:0045449
OE9A032961	3.9873	-2.88985	1.09813	-2.6316	0.00849845	0.073073	OE9A032961	ID=OE9A032961T1;Parent=OE9A032961;Name=OE9A032961T1;product=OE9A032961P1
OE9A029983	10.5951	-2.88966	0.763061	-3.78693	0.000152523	0.00340475	OE9A029983	ID=OE9A029983T1;Parent=OE9A029983;Name=OE9A029983T1;product=OE9A029983P1
OE9A002619	51.8898	-2.888	1.01331	-2.85007	0.00437102	0.046042	OE9A002619	ID=OE9A002619T1;Parent=OE9A002619;Name=OE9A002619T1;product=OE9A002619P1;Description=E3 ubiquitin- ligase PUB23-like;Ontology_term=GO:0004842%2C GO:0005488%2C GO:0016567
OE9A116163	87.4813	-2.87716	0.618008	-4.65553	3.23145e-06	0.000129708	OE9A116163	ID=OE9A116163T1;Parent=OE9A116163;Name=OE9A116163T1;product=OE9A116163P1;Description=E3 ubiquitin- ligase PUB23-like;Ontology_term=GO:0004842%2C GO:0005488%2C GO:0016567
OE9A038510	129.246	-2.86927	0.554817	-5.17156	2.32148e-07	1.23279e-05	OE9A038510	ID=OE9A038510T1;Parent=OE9A038510;Name=OE9A038510T1;product=OE9A038510P1;Description=allene oxide synthase 1, chloroplastic-like;Ontology_term=GO:0004497%2C GO:0005506%2C GO:0016705%2C GO:0020037%2C GO:0047987%2C GO:0055114
OE9A121134	13.8897	-2.86366	0.776239	-3.68914	0.00022501	0.0046393	OE9A121134	ID=OE9A121134T1;Parent=OE9A121134;Name=OE9A121134T1;product=OE9A121134P1
OE9A090630	254.889	-2.86291	0.697821	-4.10264	4.08461e-05	0.00113383	OE9A090630	ID=OE9A090630T1;Parent=OE9A090630;Name=OE9A090630T1;product=OE9A090630P1;Description=xyloglucan endotransglucosylase hydrolase 2-like;Ontology_term=GO:0004553%2C GO:0005618%2C GO:0010411%2C GO:0016021%2C GO:0016762%2C GO:0042546%2C GO:0048046%2C GO:0071555
OE9A065849	273.839	-2.85518	0.379128	-7.53092	5.03852e-14	9.10091e-12	OE9A065849	ID=OE9A065849T1;Parent=OE9A065849;Name=OE9A065849T1;product=OE9A065849P1
OE9A080338	442.593	-2.84704	0.411092	-6.92555	4.34287e-12	5.68318e-10	OE9A080338	ID=OE9A080338T1;Parent=OE9A080338;Name=OE9A080338T1;product=OE9A080338P1
OE9A109113	2927.88	-2.84033	0.336834	-8.43244	3.38518e-17	1.17333e-14	OE9A109113	ID=OE9A109113T1;Parent=OE9A109113;Name=OE9A109113T1;product=OE9A109113P1;Description=ethylene-responsive transcription factor 4-like;Ontology_term=GO:0003677%2C GO:0003700%2C GO:0005667%2C GO:0006355%2C GO:0045449
OE9A031522	70.9155	-2.8398	0.935146	-3.03675	0.00239145	0.0295606	OE9A031522	ID=OE9A031522T1;Parent=OE9A031522;Name=OE9A031522T1;product=OE9A031522P1;Description=mitogen-activated kinase kinase kinase NPK1-like;Ontology_term=GO:0004672%2C GO:0005524%2C GO:0006468
OE9A075408	376.016	-2.82745	0.380229	-7.43618	1.03638e-13	1.84598e-11	OE9A075408	ID=OE9A075408T1;Parent=OE9A075408;Name=OE9A075408T1;product=OE9A075408P1;Description=syntaxin-121-like;Ontology_term=GO:0000149%2C GO:0005484%2C GO:0005886%2C GO:0006886%2C GO:0006887%2C GO:0006906%2C GO:0012505%2C GO:0016021%2C GO:0031201%2C GO:0048278
OE9A008801	1045.16	-2.82539	0.327804	-8.61916	6.74478e-18	2.88328e-15	OE9A008801	ID=OE9A008801T1;Parent=OE9A008801;Name=OE9A008801T1;product=OE9A008801P1;Description=E3 ubiquitin- ligase RING1-like;Ontology_term=GO:0005515%2C GO:0008270
OE9A067990	121.461	-2.81313	0.406764	-6.91586	4.65024e-12	6.04866e-10	OE9A067990	ID=OE9A067990T1;Parent=OE9A067990;Name=OE9A067990T1;product=OE9A067990P1;Description=uncharacterized protein LOC111404955;Ontology_term=GO:0016021
OE9A012294	198.822	-2.79681	0.492606	-5.67758	1.3661e-08	9.19664e-07	OE9A012294	ID=OE9A012294T1;Parent=OE9A012294;Name=OE9A012294T1;product=OE9A012294P1;Description=allene oxide synthase 1, chloroplastic-like;Ontology_term=GO:0004497%2C GO:0005506%2C GO:0016705%2C GO:0020037%2C GO:0055114
OE9A041636	856.486	-2.79212	0.309691	-9.01581	1.95417e-19	1.2225e-16	OE9A041636	ID=OE9A041636T1;Parent=OE9A041636;Name=OE9A041636T1;product=OE9A041636P1;Description=U-box domain-containing 17;Ontology_term=GO:0004842%2C GO:0005515%2C GO:0005634%2C GO:0005737%2C GO:0009814%2C GO:0016567%2C GO:0016874
OE9A068726	1003.07	-2.79148	0.354216	-7.88072	3.25496e-15	7.7796e-13	OE9A068726	ID=OE9A068726T1;Parent=OE9A068726;Name=OE9A068726T1;product=OE9A068726P1
OE9A081767	219.687	-2.78979	0.435773	-6.40194	1.53412e-10	1.50186e-08	OE9A081767	ID=OE9A081767T1;Parent=OE9A081767;Name=OE9A081767T1;product=OE9A081767P1;Description=Beta-1,4-mannosyl-glyco 4-beta-N-acetylglucosaminyltransferase;Ontology_term=GO:0003830%2C GO:0006487%2C GO:0016021
OE9A065125	1252.99	-2.78936	0.286255	-9.74433	1.95056e-22	2.5015e-19	OE9A065125	ID=OE9A065125T1;Parent=OE9A065125;Name=OE9A065125T1;product=OE9A065125P1
OE9A011680	297.129	-2.78858	0.466096	-5.98284	2.19276e-09	1.7147e-07	OE9A011680	ID=OE9A011680T1;Parent=OE9A011680;Name=OE9A011680T1;product=OE9A011680P1;Description=extra-large guanine nucleotide-binding 1-like;Ontology_term=GO:0003924%2C GO:0004871%2C GO:0005525%2C GO:0007186%2C GO:0031683
OE9A098652	435.84	-2.7875	0.406955	-6.84965	7.40289e-12	9.17279e-10	OE9A098652	ID=OE9A098652T1;Parent=OE9A098652;Name=OE9A098652T1;product=OE9A098652P1
OE9A019561	400.132	-2.78308	0.388891	-7.15644	8.27974e-13	1.19307e-10	OE9A019561	ID=OE9A019561T1;Parent=OE9A019561;Name=OE9A019561T1;product=OE9A019561P1
OE9A049987	32.9631	-2.78237	0.543642	-5.11801	3.08781e-07	1.58716e-05	OE9A049987	ID=OE9A049987T1;Parent=OE9A049987;Name=OE9A049987T1;product=OE9A049987P1;Description=NDR1-like;Ontology_term=GO:0005886
OE9A041245	9.27896	-2.78115	0.909383	-3.05828	0.00222611	0.0280439	OE9A041245	ID=OE9A041245T1;Parent=OE9A041245;Name=OE9A041245T1;product=OE9A041245P1;Description=helicase-like transcription factor CHR28;Ontology_term=GO:0005515%2C GO:0005524%2C GO:0008270
OE9A089731	269.848	-2.77671	0.496398	-5.59371	2.22265e-08	1.45061e-06	OE9A089731	ID=OE9A089731T1;Parent=OE9A089731;Name=OE9A089731T1;product=OE9A089731P1;Description=scarecrow 21;Ontology_term=GO:0006355
OE9A057678	84.276	-2.77629	0.468736	-5.92292	3.1628e-09	2.40008e-07	OE9A057678	ID=OE9A057678T1;Parent=OE9A057678;Name=OE9A057678T1;product=OE9A057678P1
OE9A040473	23.9522	-2.7641	0.897627	-3.07934	0.00207462	0.026807	OE9A040473	ID=OE9A040473T1;Parent=OE9A040473;Name=OE9A040473T1;product=OE9A040473P1
OE9A043482	138.589	-2.75002	0.484047	-5.68131	1.33666e-08	9.02213e-07	OE9A043482	ID=OE9A043482T1;Parent=OE9A043482;Name=OE9A043482T1;product=OE9A043482P1;Description=glutamyl-tRNA reductase 1, chloroplastic-like;Ontology_term=GO:0006782%2C GO:0008883%2C GO:0009507%2C GO:0015995%2C GO:0050661%2C GO:0055114
OE9A101780	1140.77	-2.74851	0.338951	-8.10886	5.1098e-16	1.48069e-13	OE9A101780	ID=OE9A101780T1;Parent=OE9A101780;Name=OE9A101780T1;product=OE9A101780P1;Description=zinc finger ZAT10-like;Ontology_term=GO:0046872
OE9A064776	36.9939	-2.74287	0.864338	-3.17338	0.00150677	0.0208903	OE9A064776	ID=OE9A064776T1;Parent=OE9A064776;Name=OE9A064776T1;product=OE9A064776P1
OE9A077755	112.105	-2.73667	0.622484	-4.39638	1.10073e-05	0.000374937	OE9A077755	ID=OE9A077755T1;Parent=OE9A077755;Name=OE9A077755T1;product=OE9A077755P1;Description=calcium-binding PBP1-like;Ontology_term=GO:0005509
OE9A111544	208.334	-2.73072	0.316659	-8.62355	6.49089e-18	2.82178e-15	OE9A111544	ID=OE9A111544T1;Parent=OE9A111544;Name=OE9A111544T1;product=OE9A111544P1
OE9A110673	657.717	-2.72991	0.416187	-6.55933	5.40501e-11	5.70506e-09	OE9A110673	ID=OE9A110673T1;Parent=OE9A110673;Name=OE9A110673T1;product=OE9A110673P1;Description=FT-interacting 1;Ontology_term=GO:0005515%2C GO:0016021
OE9A005131	12.3202	-2.72837	0.880783	-3.09767	0.00195051	0.0255577	OE9A005131	ID=OE9A005131T1;Parent=OE9A005131;Name=OE9A005131T1;product=OE9A005131P1
OE9A089257	1032.43	-2.72751	0.416806	-6.54384	5.99577e-11	6.25145e-09	OE9A089257	ID=OE9A089257T1;Parent=OE9A089257;Name=OE9A089257T1;product=OE9A089257P1;Description=probable calcium-binding CML45;Ontology_term=GO:0005509
OE9A101290	148.976	-2.71869	0.450715	-6.03194	1.62e-09	1.31909e-07	OE9A101290	ID=OE9A101290T1;Parent=OE9A101290;Name=OE9A101290T1;product=OE9A101290P1;Description=high mobility group B 1-like;Ontology_term=GO:0005982%2C GO:0005985%2C GO:0006011%2C GO:0016020%2C GO:0016760%2C GO:0030244
OE9A048147	2200.32	-2.71811	0.385532	-7.05029	1.78549e-12	2.46215e-10	OE9A048147	ID=OE9A048147T1;Parent=OE9A048147;Name=OE9A048147T1;product=OE9A048147P1;Description=probable phosphatase 2C 25;Ontology_term=GO:0004722%2C GO:0006470%2C GO:0008287%2C GO:0046872
OE9A085648	561.889	-2.71758	0.398254	-6.82373	8.87066e-12	1.07651e-09	OE9A085648	ID=OE9A085648T1;Parent=OE9A085648;Name=OE9A085648T1;product=OE9A085648P1;Description=zinc finger A20 and AN1 domain-containing stress-associated 4-like;Ontology_term=GO:0003677%2C GO:0008270
OE9A063618	10.9661	-2.71594	0.961525	-2.82462	0.00473366	0.0486823	OE9A063618	ID=OE9A063618T1;Parent=OE9A063618;Name=OE9A063618T1;product=OE9A063618P1;Description=poly(U)-specific endoribonuclease-B-like;Ontology_term=GO:0016788
OE9A023470	2057.63	-2.71587	0.302995	-8.96342	3.14753e-19	1.87747e-16	OE9A023470	ID=OE9A023470T1;Parent=OE9A023470;Name=OE9A023470T1;product=OE9A023470P1;Description=probable CCR4-associated factor 1 homolog 9;Ontology_term=GO:0000289%2C GO:0003676%2C GO:0004535%2C GO:0005634%2C GO:0030014%2C GO:0051252%2C GO:0090503
OE9A099586	7.89175	-2.70956	1.00236	-2.70319	0.00686767	0.063379	OE9A099586	ID=OE9A099586T1;Parent=OE9A099586;Name=OE9A099586T1;product=OE9A099586P1;Description=probable E3 ubiquitin- ligase LUL4;Ontology_term=GO:0005515%2C GO:0008270
OE9A095120	10.6879	-2.69784	0.786934	-3.4283	0.000607378	0.0104205	OE9A095120	ID=OE9A095120T1;Parent=OE9A095120;Name=OE9A095120T1;product=OE9A095120P1
OE9A026617	166.928	-2.69784	0.399881	-6.7466	1.51348e-11	1.75653e-09	OE9A026617	ID=OE9A026617T1;Parent=OE9A026617;Name=OE9A026617T1;product=OE9A026617P1
OE9A012474	519.943	-2.69638	0.329803	-8.17573	2.94068e-16	8.97923e-14	OE9A012474	ID=OE9A012474T1;Parent=OE9A012474;Name=OE9A012474T1;product=OE9A012474P1;Description=uncharacterized protein LOC111411035;Ontology_term=GO:0005515
OE9A078886	140.355	-2.69201	0.385663	-6.98022	2.94711e-12	3.99949e-10	OE9A078886	ID=OE9A078886T1;Parent=OE9A078886;Name=OE9A078886T1;product=OE9A078886P1;Description=wall-associated receptor kinase 2-like;Ontology_term=GO:0004672%2C GO:0005524%2C GO:0006468
OE9A053469	4.229	-2.67838	0.989806	-2.70597	0.00681058	0.0629784	OE9A053469	ID=OE9A053469T1;Parent=OE9A053469;Name=OE9A053469T1;product=OE9A053469P1;Description=translation factor SUI1 homolog;Ontology_term=GO:0003743%2C GO:0005840%2C GO:0006446
OE9A057587	23.8023	-2.67715	0.819057	-3.26857	0.00108092	0.0163567	OE9A057587	ID=OE9A057587T1;Parent=OE9A057587;Name=OE9A057587T1;product=OE9A057587P1;Description=secoisolariciresinol dehydrogenase-like;Ontology_term=GO:0016491%2C GO:0055114
OE9A022911	13.0908	-2.67156	0.845986	-3.15792	0.00158898	0.0218233	OE9A022911	ID=OE9A022911T1;Parent=OE9A022911;Name=OE9A022911T1;product=OE9A022911P1;Description=myb-related 308-like;Ontology_term=GO:0003677%2C GO:0009909
OE9A057817	8.54648	-2.66988	0.835931	-3.1939	0.00140366	0.0198579	OE9A057817	ID=OE9A057817T1;Parent=OE9A057817;Name=OE9A057817T1;product=OE9A057817P1;Description=transcription factor bHLH35 isoform X2;Ontology_term=GO:0016020%2C GO:0032440%2C GO:0046983%2C GO:0055114
OE9A027709	21.6124	-2.66851	0.616923	-4.32551	1.52179e-05	0.000493458	OE9A027709	ID=OE9A027709T1;Parent=OE9A027709;Name=OE9A027709T1;product=OE9A027709P1
OE9A075120	83.1938	-2.65926	0.543819	-4.88997	1.00851e-06	4.60272e-05	OE9A075120	ID=OE9A075120T1;Parent=OE9A075120;Name=OE9A075120T1;product=OE9A075120P1;Description=uncharacterized protein LOC111408249;Ontology_term=GO:0009505
OE9A022439	47.2975	-2.65234	0.66223	-4.00516	6.19742e-05	0.00160078	OE9A022439	ID=OE9A022439T1;Parent=OE9A022439;Name=OE9A022439T1;product=OE9A022439P1;Description=transcription factor MYB108-like;Ontology_term=GO:0003677
OE9A048904	22.6941	-2.6492	0.41733	-6.34799	2.18151e-10	2.08782e-08	OE9A048904	ID=OE9A048904T1;Parent=OE9A048904;Name=OE9A048904T1;product=OE9A048904P1;Description=RING-H2 finger ATL2-like;Ontology_term=GO:0005515%2C GO:0008270
OE9A045980	31.3204	-2.64012	0.740219	-3.56668	0.000361537	0.00684359	OE9A045980	ID=OE9A045980T1;Parent=OE9A045980;Name=OE9A045980T1;product=OE9A045980P1;Description=U-box domain-containing 27-like;Ontology_term=GO:0004842%2C GO:0005488%2C GO:0016567
OE9A116451	83.1873	-2.63814	0.989699	-2.66559	0.00768527	0.0682783	OE9A116451	ID=OE9A116451T1;Parent=OE9A116451;Name=OE9A116451T1;product=OE9A116451P1
OE9A108993	12.1162	-2.62687	1.05236	-2.49618	0.0125538	0.0954904	OE9A108993	ID=OE9A108993T1;Parent=OE9A108993;Name=OE9A108993T1;product=OE9A108993P1
OE9A041553	232.167	-2.62533	0.403076	-6.51324	7.35473e-11	7.48577e-09	OE9A041553	ID=OE9A041553T1;Parent=OE9A041553;Name=OE9A041553T1;product=OE9A041553P1;Description=two-component response regulator ARR5-like;Ontology_term=GO:0000160%2C GO:0005622
OE9A011034	753.721	-2.62002	0.388915	-6.73673	1.61992e-11	1.8632e-09	OE9A011034	ID=OE9A011034T1;Parent=OE9A011034;Name=OE9A011034T1;product=OE9A011034P1
OE9A052076	250.662	-2.61872	0.387939	-6.75034	1.47495e-11	1.72037e-09	OE9A052076	ID=OE9A052076T1;Parent=OE9A052076;Name=OE9A052076T1;product=OE9A052076P1;Description=syntaxin-121-like;Ontology_term=GO:0000149%2C GO:0005484%2C GO:0005886%2C GO:0006886%2C GO:0006887%2C GO:0006906%2C GO:0012505%2C GO:0016021%2C GO:0031201%2C GO:0048278
OE9A101726	182.465	-2.61777	0.637101	-4.10888	3.97588e-05	0.00111329	OE9A101726	ID=OE9A101726T1;Parent=OE9A101726;Name=OE9A101726T1;product=OE9A101726P1;Description=F-box At1g78100;Ontology_term=GO:0005515
OE9A053339	3890.56	-2.61655	0.294401	-8.88771	6.23838e-19	3.47844e-16	OE9A053339	ID=OE9A053339T1;Parent=OE9A053339;Name=OE9A053339T1;product=OE9A053339P1;Description=ethylene-responsive transcription factor 4-like;Ontology_term=GO:0003677%2C GO:0003700%2C GO:0005667%2C GO:0006355%2C GO:0045449
OE9A099983	2113.49	-2.61063	0.327346	-7.97515	1.5219e-15	3.98319e-13	OE9A099983	ID=OE9A099983T1;Parent=OE9A099983;Name=OE9A099983T1;product=OE9A099983P1;Description=ethylene-responsive transcription factor 5-like;Ontology_term=GO:0003677%2C GO:0003700%2C GO:0005667%2C GO:0006355%2C GO:0045449
OE9A114583	2567.19	-2.60974	0.326645	-7.98954	1.35448e-15	3.61886e-13	OE9A114583	ID=OE9A114583T1;Parent=OE9A114583;Name=OE9A114583T1;product=OE9A114583P1
OE9A060701	121.126	-2.60467	0.478584	-5.44245	5.25531e-08	3.17909e-06	OE9A060701	ID=OE9A060701T1;Parent=OE9A060701;Name=OE9A060701T1;product=OE9A060701P1;Description=Spindle pole body;Ontology_term=GO:0015031
OE9A113416	1797.28	-2.60459	0.348227	-7.47959	7.45535e-14	1.33722e-11	OE9A113416	ID=OE9A113416T1;Parent=OE9A113416;Name=OE9A113416T1;product=OE9A113416P1;Description=UDP-glucuronate 4-epimerase 1;Ontology_term=GO:0005768%2C GO:0005802%2C GO:0005982%2C GO:0005985%2C GO:0009117%2C GO:0016021%2C GO:0050378%2C GO:0050662
OE9A116071	141.285	-2.60346	0.467365	-5.57051	2.54e-08	1.6369e-06	OE9A116071	ID=OE9A116071T1;Parent=OE9A116071;Name=OE9A116071T1;product=OE9A116071P1;Description=NDR1 HIN1-Like 3-like;Ontology_term=GO:0016021
OE9A117461	5.89685	-2.60082	0.986146	-2.63736	0.00835545	0.0721579	OE9A117461	ID=OE9A117461T1;Parent=OE9A117461;Name=OE9A117461T1;product=OE9A117461P1;Description=transcription factor HBP-1b(c38)-like;Ontology_term=GO:0006351%2C GO:0043565
OE9A053907	4416.2	-2.59425	0.326483	-7.94605	1.92546e-15	4.84178e-13	OE9A053907	ID=OE9A053907T1;Parent=OE9A053907;Name=OE9A053907T1;product=OE9A053907P1;Description=scarecrow 21;Ontology_term=GO:0003700%2C GO:0005634%2C GO:0005667%2C GO:0006355%2C GO:0043565%2C GO:0045449
OE9A068770	157.08	-2.579	0.37797	-6.82329	8.89783e-12	1.07651e-09	OE9A068770	ID=OE9A068770T1;Parent=OE9A068770;Name=OE9A068770T1;product=OE9A068770P1;Description=lipid phosphate phosphatase epsilon 2, chloroplastic-like;Ontology_term=GO:0006651%2C GO:0006687%2C GO:0008195%2C GO:0009395%2C GO:0009507%2C GO:0016020
OE9A101371	927.588	-2.57871	0.329059	-7.83661	4.62871e-15	1.07929e-12	OE9A101371	ID=OE9A101371T1;Parent=OE9A101371;Name=OE9A101371T1;product=OE9A101371P1;Description=RING-H2 finger ATL2-like;Ontology_term=GO:0005515%2C GO:0008270
OE9A014114	247.102	-2.57107	0.647181	-3.97273	7.10531e-05	0.00179859	OE9A014114	ID=OE9A014114T1;Parent=OE9A014114;Name=OE9A014114T1;product=OE9A014114P1;Description=protein DMP5-like;Ontology_term=GO:0016021
OE9A015716	91.1854	-2.56763	0.447538	-5.73723	9.6236e-09	6.59989e-07	OE9A015716	ID=OE9A015716T1;Parent=OE9A015716;Name=OE9A015716T1;product=OE9A015716P1;Description=NAC domain-containing 90;Ontology_term=GO:0003677%2C GO:0005634%2C GO:0006355
OE9A088368	334.609	-2.56701	0.33838	-7.58617	3.29501e-14	6.12418e-12	OE9A088368	ID=OE9A088368T1;Parent=OE9A088368;Name=OE9A088368T1;product=OE9A088368P1
OE9A100460	599.93	-2.56143	0.385815	-6.63901	3.15794e-11	3.43212e-09	OE9A100460	ID=OE9A100460T1;Parent=OE9A100460;Name=OE9A100460T1;product=OE9A100460P1
OE9A043605	3069.55	-2.56009	0.384569	-6.65705	2.79381e-11	3.07547e-09	OE9A043605	ID=OE9A043605T1;Parent=OE9A043605;Name=OE9A043605T1;product=OE9A043605P1;Description=probable WRKY transcription factor 33;Ontology_term=GO:0003700%2C GO:0005667%2C GO:0006355%2C GO:0043565%2C GO:0045449
OE9A072934	15.3328	-2.55343	0.800881	-3.18827	0.00143127	0.0201265	OE9A072934	ID=OE9A072934T1;Parent=OE9A072934;Name=OE9A072934T1;product=OE9A072934P1;Description=zinc finger ZAT10-like;Ontology_term=GO:0003676%2C GO:0046872
OE9A073709	92.5819	-2.54757	0.471501	-5.40311	6.54937e-08	3.87062e-06	OE9A073709	ID=OE9A073709T1;Parent=OE9A073709;Name=OE9A073709T1;product=OE9A073709P1
OE9A009638	552.7	-2.54032	0.401368	-6.32915	2.46516e-10	2.34181e-08	OE9A009638	ID=OE9A009638T1;Parent=OE9A009638;Name=OE9A009638T1;product=OE9A009638P1;Description=phosphatidylinositol:ceramide inositolphosphotransferase 2-like;Ontology_term=GO:0016021
OE9A029195	13.1322	-2.53642	0.721749	-3.51427	0.000440972	0.00806164	OE9A029195	ID=OE9A029195T1;Parent=OE9A029195;Name=OE9A029195T1;product=OE9A029195P1;Description=galactinol synthase 2-like;Ontology_term=GO:0016757
OE9A043064	1302.17	-2.53593	0.342547	-7.40318	1.32965e-13	2.28887e-11	OE9A043064	ID=OE9A043064T1;Parent=OE9A043064;Name=OE9A043064T1;product=OE9A043064P1;Description=AP2 ERF and B3 domain-containing transcription factor RAV1;Ontology_term=GO:0003677%2C GO:0003700%2C GO:0005634%2C GO:0005667%2C GO:0006355%2C GO:0045449
OE9A107203	509.373	-2.53297	0.579247	-4.37286	1.22628e-05	0.00040901	OE9A107203	ID=OE9A107203T1;Parent=OE9A107203;Name=OE9A107203T1;product=OE9A107203P1
OE9A104718	54.0027	-2.53086	0.519558	-4.87118	1.10931e-06	5.00048e-05	OE9A104718	ID=OE9A104718T1;Parent=OE9A104718;Name=OE9A104718T1;product=OE9A104718P1;Description=zinc finger ZAT10-like;Ontology_term=GO:0046872
OE9A036280	51.272	-2.52983	0.54383	-4.65188	3.2893e-06	0.000131824	OE9A036280	ID=OE9A036280T1;Parent=OE9A036280;Name=OE9A036280T1;product=OE9A036280P1;Description=late embryogenesis abundant At1g64065-like;Ontology_term=GO:0016020
OE9A008644	16.8672	-2.52915	0.672845	-3.75889	0.000170668	0.00370031	OE9A008644	ID=OE9A008644T1;Parent=OE9A008644;Name=OE9A008644T1;product=OE9A008644P1;Description=cysteine ase inhibitor B-like;Ontology_term=GO:0004869%2C GO:0010951
OE9A104251	192.299	-2.52694	0.523583	-4.82624	1.39138e-06	6.13188e-05	OE9A104251	ID=OE9A104251T1;Parent=OE9A104251;Name=OE9A104251T1;product=OE9A104251P1
OE9A042020	393.741	-2.52495	0.361598	-6.98276	2.89437e-12	3.94881e-10	OE9A042020	ID=OE9A042020T1;Parent=OE9A042020;Name=OE9A042020T1;product=OE9A042020P1;Description=Beta-1,4-mannosyl-glyco 4-beta-N-acetylglucosaminyltransferase;Ontology_term=GO:0003830%2C GO:0006487%2C GO:0016021
OE9A087218	29.7811	-2.5223	0.763075	-3.30544	0.000948283	0.014858	OE9A087218	ID=OE9A087218T1;Parent=OE9A087218;Name=OE9A087218T1;product=OE9A087218P1;Description=exocyst complex component EXO70H1-like;Ontology_term=GO:0000145%2C GO:0006887
OE9A118747	1477.68	-2.51567	0.347498	-7.23938	4.50745e-13	6.84092e-11	OE9A118747	ID=OE9A118747T1;Parent=OE9A118747;Name=OE9A118747T1;product=OE9A118747P1;Description=AP2 ERF and B3 domain-containing transcription factor RAV1;Ontology_term=GO:0003677%2C GO:0003700%2C GO:0005634%2C GO:0005667%2C GO:0006355%2C GO:0045449
OE9A060877	7.79623	-2.51125	0.853981	-2.94064	0.00327533	0.0371721	OE9A060877	ID=OE9A060877T1;Parent=OE9A060877;Name=OE9A060877T1;product=OE9A060877P1;Description=WD repeat-containing 44-like;Ontology_term=GO:0005515
OE9A015091	7.38347	-2.50912	0.81222	-3.08921	0.0020069	0.0261294	OE9A015091	ID=OE9A015091T1;Parent=OE9A015091;Name=OE9A015091T1;product=OE9A015091P1;Description=SENSITIVE TO PROTON RHIZOTOXICITY 1;Ontology_term=GO:0003676%2C GO:0046872%2C GO:0050896
OE9A064167	239.214	-2.50881	0.439557	-5.70758	1.14592e-08	7.81694e-07	OE9A064167	ID=OE9A064167T1;Parent=OE9A064167;Name=OE9A064167T1;product=OE9A064167P1;Description=L-ascorbate oxidase homolog;Ontology_term=GO:0005507%2C GO:0006118%2C GO:0008447%2C GO:0009505%2C GO:0009506%2C GO:0016722%2C GO:0019852%2C GO:0055114
OE9A039140	1146.24	-2.50819	0.439975	-5.70075	1.19278e-08	8.11505e-07	OE9A039140	ID=OE9A039140T1;Parent=OE9A039140;Name=OE9A039140T1;product=OE9A039140P1;Description=probable calcium-binding CML45;Ontology_term=GO:0005509
OE9A116204	47.4969	-2.50053	0.738145	-3.38759	0.000705105	0.0117132	OE9A116204	ID=OE9A116204T1;Parent=OE9A116204;Name=OE9A116204T1;product=OE9A116204P1;Description=protein DMP6-like;Ontology_term=GO:0016021
OE9A083347	110.301	-2.48355	0.597351	-4.15761	3.21592e-05	0.000930954	OE9A083347	ID=OE9A083347T1;Parent=OE9A083347;Name=OE9A083347T1;product=OE9A083347P1;Description=lysosomal beta glucosidase-like;Ontology_term=GO:0004553%2C GO:0005975
OE9A057599	82.728	-2.47622	0.406672	-6.089	1.13621e-09	9.46194e-08	OE9A057599	ID=OE9A057599T1;Parent=OE9A057599;Name=OE9A057599T1;product=OE9A057599P1;Description=calcium-binding CML42;Ontology_term=GO:0005509
OE9A051537	79.1072	-2.47558	0.400259	-6.18494	6.2125e-10	5.457e-08	OE9A051537	ID=OE9A051537T1;Parent=OE9A051537;Name=OE9A051537T1;product=OE9A051537P1;Description=calcium-binding CML42;Ontology_term=GO:0005509
OE9A027099	244.943	-2.47334	0.288213	-8.58166	9.35145e-18	3.69008e-15	OE9A027099	ID=OE9A027099T1;Parent=OE9A027099;Name=OE9A027099T1;product=OE9A027099P1;Description=Mediator of RNA polymerase II transcription subunit 26,;Ontology_term=GO:0012505%2C GO:0016020%2C GO:0043227%2C GO:0043229%2C GO:0044444
OE9A081297	320.524	-2.4669	0.655959	-3.76076	0.000169398	0.00367588	OE9A081297	ID=OE9A081297T1;Parent=OE9A081297;Name=OE9A081297T1;product=OE9A081297P1
OE9A089778	491.133	-2.46649	0.350723	-7.03258	2.02749e-12	2.78091e-10	OE9A089778	ID=OE9A089778T1;Parent=OE9A089778;Name=OE9A089778T1;product=OE9A089778P1;Description=GATA transcription factor 5-like;Ontology_term=GO:0003700%2C GO:0005634%2C GO:0005667%2C GO:0008270%2C GO:0043565%2C GO:0045449%2C GO:0045893
OE9A083942	20.463	-2.46221	0.719153	-3.42376	0.000617616	0.0105749	OE9A083942	ID=OE9A083942T1;Parent=OE9A083942;Name=OE9A083942T1;product=OE9A083942P1;Description=ALA-interacting subunit 1-like;Ontology_term=GO:0016021
OE9A067165	350.89	-2.45984	0.37017	-6.64514	3.02925e-11	3.30749e-09	OE9A067165	ID=OE9A067165T1;Parent=OE9A067165;Name=OE9A067165T1;product=OE9A067165P1;Description=Serine threonine kinase;Ontology_term=GO:0004672%2C GO:0005524%2C GO:0006468
OE9A098086	245.115	-2.45953	0.504252	-4.87759	1.07391e-06	4.87516e-05	OE9A098086	ID=OE9A098086T1;Parent=OE9A098086;Name=OE9A098086T1;product=OE9A098086P1;Description=heavy metal-associated isoprenylated plant 3-like;Ontology_term=GO:0030001%2C GO:0046872
OE9A031590	32.9383	-2.4562	0.802713	-3.05987	0.00221431	0.0279365	OE9A031590	ID=OE9A031590T1;Parent=OE9A031590;Name=OE9A031590T1;product=OE9A031590P1;Description=NAC transcription factor 29-like;Ontology_term=GO:0003677%2C GO:0005634%2C GO:0006355%2C GO:0009825%2C GO:0009835%2C GO:0009908%2C GO:0010150
OE9A041775	214.238	-2.45518	0.420543	-5.83811	5.27968e-09	3.79001e-07	OE9A041775	ID=OE9A041775T1;Parent=OE9A041775;Name=OE9A041775T1;product=OE9A041775P1;Description=oxalate-- ligase-like;Ontology_term=GO:0009506%2C GO:0009570%2C GO:0009735%2C GO:0009805%2C GO:0009809%2C GO:0009811%2C GO:0010030%2C GO:0010214%2C GO:0016207%2C GO:0033611%2C GO:0046487%2C GO:0048046%2C GO:0050203%2C GO:0050832
OE9A051455	233.693	-2.44837	0.332806	-7.35676	1.88427e-13	3.13829e-11	OE9A051455	ID=OE9A051455T1;Parent=OE9A051455;Name=OE9A051455T1;product=OE9A051455P1;Description=mitogen-activated kinase kinase kinase 18-like;Ontology_term=GO:0004672%2C GO:0005524%2C GO:0006468%2C GO:0016020
OE9A087093	106.624	-2.43753	0.382809	-6.36749	1.92148e-10	1.85278e-08	OE9A087093	ID=OE9A087093T1;Parent=OE9A087093;Name=OE9A087093T1;product=OE9A087093P1
OE9A107440	166.236	-2.43746	0.415509	-5.86621	4.45876e-09	3.2675e-07	OE9A107440	ID=OE9A107440T1;Parent=OE9A107440;Name=OE9A107440T1;product=OE9A107440P1;Description=universal stress A;Ontology_term=GO:0006950
OE9A105546	96.5217	-2.4363	0.362796	-6.71536	1.87605e-11	2.14816e-09	OE9A105546	ID=OE9A105546T1;Parent=OE9A105546;Name=OE9A105546T1;product=OE9A105546P1;Description=probable calcium-binding CML18;Ontology_term=GO:0005509
OE9A020664	53.0501	-2.43344	0.68696	-3.54234	0.000396601	0.0074197	OE9A020664	ID=OE9A020664T1;Parent=OE9A020664;Name=OE9A020664T1;product=OE9A020664P1
OE9A020845	67.6639	-2.41018	0.384447	-6.2692	3.62918e-10	3.32446e-08	OE9A020845	ID=OE9A020845T1;Parent=OE9A020845;Name=OE9A020845T1;product=OE9A020845P1;Description=stearoyl-[acyl-carrier- ] 9-desaturase, chloroplastic;Ontology_term=GO:0006633%2C GO:0009507%2C GO:0045300%2C GO:0046872%2C GO:0055114
OE9A025785	4.08698	-2.40336	0.957853	-2.50911	0.0121036	0.0929759	OE9A025785	ID=OE9A025785T1;Parent=OE9A025785;Name=OE9A025785T1;product=OE9A025785P1;Description=ethylene-responsive transcription factor ERF003-like;Ontology_term=GO:0003677%2C GO:0003700%2C GO:0005667%2C GO:0006355%2C GO:0045449
OE9A109606	10.479	-2.4013	0.72855	-3.29599	0.00098074	0.0152178	OE9A109606	ID=OE9A109606T1;Parent=OE9A109606;Name=OE9A109606T1;product=OE9A109606P1;Description=auxin-responsive SAUR15-like;Ontology_term=GO:0009733
OE9A118456	3309.9	-2.39769	0.274463	-8.73592	2.41687e-18	1.19212e-15	OE9A118456	ID=OE9A118456T1;Parent=OE9A118456;Name=OE9A118456T1;product=OE9A118456P1;Description=calcium-binding allergen Ole e 8-like;Ontology_term=GO:0005509
OE9A050550	368.295	-2.38815	0.378059	-6.31687	2.6691e-10	2.5169e-08	OE9A050550	ID=OE9A050550T1;Parent=OE9A050550;Name=OE9A050550T1;product=OE9A050550P1;Description=beta-1,4-mannosyl-glyco 4-beta-N-acetylglucosaminyltransferase-like;Ontology_term=GO:0003830%2C GO:0006487%2C GO:0016021
OE9A035702	2808.42	-2.38216	0.310747	-7.6659	1.7758e-14	3.58642e-12	OE9A035702	ID=OE9A035702T1;Parent=OE9A035702;Name=OE9A035702T1;product=OE9A035702P1;Description=ethylene-responsive transcription factor 2-like;Ontology_term=GO:0003677%2C GO:0003700%2C GO:0005634%2C GO:0005667%2C GO:0006355%2C GO:0045449%2C GO:0050896
OE9A121172	617.929	-2.38073	0.450829	-5.28079	1.28631e-07	7.17232e-06	OE9A121172	ID=OE9A121172T1;Parent=OE9A121172;Name=OE9A121172T1;product=OE9A121172P1;Description=tetraspanin-8-like;Ontology_term=GO:0006811%2C GO:0016021
OE9A084516	553.918	-2.3764	0.400872	-5.92807	3.0651e-09	2.33979e-07	OE9A084516	ID=OE9A084516T1;Parent=OE9A084516;Name=OE9A084516T1;product=OE9A084516P1;Description=UDP-glucuronate 4-epimerase 6;Ontology_term=GO:0005768%2C GO:0005802%2C GO:0005975%2C GO:0016021%2C GO:0016857%2C GO:0050662
OE9A081134	3473.53	-2.3735	0.325715	-7.28703	3.16869e-13	5.0169e-11	OE9A081134	ID=OE9A081134T1;Parent=OE9A081134;Name=OE9A081134T1;product=OE9A081134P1;Description=probable WRKY transcription factor 46;Ontology_term=GO:0003700%2C GO:0005667%2C GO:0006355%2C GO:0043565%2C GO:0045449
OE9A055600	394.79	-2.37019	0.300788	-7.87993	3.27575e-15	7.7796e-13	OE9A055600	ID=OE9A055600T1;Parent=OE9A055600;Name=OE9A055600T1;product=OE9A055600P1;Description=Mediator of RNA polymerase II transcription subunit 26,;Ontology_term=GO:0012505%2C GO:0016020%2C GO:0043227%2C GO:0043229%2C GO:0044444
OE9A024806	6.1742	-2.36612	0.844424	-2.80205	0.00507782	0.0513976	OE9A024806	ID=OE9A024806T1;Parent=OE9A024806;Name=OE9A024806T1;product=OE9A024806P1;Description=probable calcium-binding CML18;Ontology_term=GO:0005509
OE9A100009	72.5816	-2.36201	0.458923	-5.14685	2.64895e-07	1.38096e-05	OE9A100009	ID=OE9A100009T1;Parent=OE9A100009;Name=OE9A100009T1;product=OE9A100009P1;Description=exocyst complex component EXO70A1-like;Ontology_term=GO:0000145%2C GO:0006887
OE9A045774	5854.82	-2.36161	0.507217	-4.65602	3.22373e-06	0.000129601	OE9A045774	ID=OE9A045774T1;Parent=OE9A045774;Name=OE9A045774T1;product=OE9A045774P1;Description=secoisolariciresinol dehydrogenase-like;Ontology_term=GO:0016491%2C GO:0055114
OE9A056077	91.7836	-2.36052	0.585931	-4.02867	5.60926e-05	0.00147299	OE9A056077	ID=OE9A056077T1;Parent=OE9A056077;Name=OE9A056077T1;product=OE9A056077P1
OE9A073431	138.6	-2.35863	0.34148	-6.90707	4.94751e-12	6.2849e-10	OE9A073431	ID=OE9A073431T1;Parent=OE9A073431;Name=OE9A073431T1;product=OE9A073431P1
OE9A120253	21.7415	-2.35259	0.947901	-2.48189	0.0130687	0.0983852	OE9A120253	ID=OE9A120253T1;Parent=OE9A120253;Name=OE9A120253T1;product=OE9A120253P1;Description=laccase-14-like;Ontology_term=GO:0005507%2C GO:0046274%2C GO:0048046%2C GO:0052716%2C GO:0055114
OE9A110132	656.295	-2.35151	0.341192	-6.89206	5.49888e-12	6.94782e-10	OE9A110132	ID=OE9A110132T1;Parent=OE9A110132;Name=OE9A110132T1;product=OE9A110132P1;Description=PHLOEM PROTEIN 2-LIKE A10;Ontology_term=GO:0016021
OE9A074280	65.2819	-2.34133	0.383576	-6.10396	1.03473e-09	8.7016e-08	OE9A074280	ID=OE9A074280T1;Parent=OE9A074280;Name=OE9A074280T1;product=OE9A074280P1
OE9A110260	96.2087	-2.33996	0.460959	-5.07628	3.84897e-07	1.93953e-05	OE9A110260	ID=OE9A110260T1;Parent=OE9A110260;Name=OE9A110260T1;product=OE9A110260P1
OE9A067469	9.51653	-2.33748	0.770309	-3.03447	0.00240956	0.0296972	OE9A067469	ID=OE9A067469T1;Parent=OE9A067469;Name=OE9A067469T1;product=OE9A067469P1;Description=transcription factor WER-like;Ontology_term=GO:0003677
OE9A003079	79.7931	-2.33501	0.927136	-2.51852	0.011785	0.0913774	OE9A003079	ID=OE9A003079T1;Parent=OE9A003079;Name=OE9A003079T1;product=OE9A003079P1
OE9A113644	5.23996	-2.32505	0.915631	-2.53929	0.0111078	0.087933	OE9A113644	ID=OE9A113644T1;Parent=OE9A113644;Name=OE9A113644T1;product=OE9A113644P1
OE9A099122	16.0154	-2.31761	0.613673	-3.77662	0.000158971	0.0034951	OE9A099122	ID=OE9A099122T1;Parent=OE9A099122;Name=OE9A099122T1;product=OE9A099122P1
OE9A024697	106.677	-2.31594	0.850471	-2.72312	0.0064668	0.0606905	OE9A024697	ID=OE9A024697T1;Parent=OE9A024697;Name=OE9A024697T1;product=OE9A024697P1;Description=mitogen-activated kinase kinase kinase NPK1-like;Ontology_term=GO:0004672%2C GO:0005524%2C GO:0006468
OE9A052054	1416.38	-2.29944	0.344096	-6.68256	2.34812e-11	2.64153e-09	OE9A052054	ID=OE9A052054T1;Parent=OE9A052054;Name=OE9A052054T1;product=OE9A052054P1;Description=zinc finger a20 and an1 domain-containing stress-associated 1;Ontology_term=GO:0003677%2C GO:0008270
OE9A016473	19.6531	-2.28867	0.686545	-3.33361	0.00085728	0.0137146	OE9A016473	ID=OE9A016473T1;Parent=OE9A016473;Name=OE9A016473T1;product=OE9A016473P1
OE9A071166	584.594	-2.28633	0.314314	-7.27402	3.48937e-13	5.45724e-11	OE9A071166	ID=OE9A071166T1;Parent=OE9A071166;Name=OE9A071166T1;product=OE9A071166P1;Description=RING-H2 finger ATL52-like;Ontology_term=GO:0004842%2C GO:0005515%2C GO:0008270%2C GO:0016020%2C GO:0016567
OE9A057231	14.633	-2.28145	0.855123	-2.66798	0.00763084	0.0679123	OE9A057231	ID=OE9A057231T1;Parent=OE9A057231;Name=OE9A057231T1;product=OE9A057231P1;Description=MLP 28;Ontology_term=GO:0006952%2C GO:0009607
OE9A109013	5.22838	-2.28125	0.835568	-2.73018	0.00633005	0.0597349	OE9A109013	ID=OE9A109013T1;Parent=OE9A109013;Name=OE9A109013T1;product=OE9A109013P1;Description=RING-H2 finger ATL63-like;Ontology_term=GO:0005515%2C GO:0005769%2C GO:0005798%2C GO:0005886%2C GO:0008270%2C GO:0030100%2C GO:0043161%2C GO:0061630%2C GO:0071470%2C GO:1901000
OE9A062087	680.681	-2.27418	0.420511	-5.40813	6.3686e-08	3.77247e-06	OE9A062087	ID=OE9A062087T1;Parent=OE9A062087;Name=OE9A062087T1;product=OE9A062087P1;Description=extra-large guanine nucleotide-binding 1-like;Ontology_term=GO:0003924%2C GO:0004871%2C GO:0007186%2C GO:0019001%2C GO:0031683
OE9A005711	229.725	-2.27335	0.494236	-4.59973	4.23039e-06	0.000164153	OE9A005711	ID=OE9A005711T1;Parent=OE9A005711;Name=OE9A005711T1;product=OE9A005711P1;Description=tetraspanin-8-like;Ontology_term=GO:0016021
OE9A042501	38.0322	-2.27035	0.596478	-3.80626	0.000141082	0.00319666	OE9A042501	ID=OE9A042501T1;Parent=OE9A042501;Name=OE9A042501T1;product=OE9A042501P1;Description=ethylene-responsive transcription factor ERF114-like;Ontology_term=GO:0003677%2C GO:0003700%2C GO:0005667%2C GO:0006355%2C GO:0045449
OE9A079777	36.2691	-2.26735	0.841356	-2.69487	0.00704162	0.0645316	OE9A079777	ID=OE9A079777T1;Parent=OE9A079777;Name=OE9A079777T1;product=OE9A079777P1;Description=myb-related Myb4-like;Ontology_term=GO:0003677
OE9A072177	1686.67	-2.26659	0.293793	-7.71494	1.21041e-14	2.54473e-12	OE9A072177	ID=OE9A072177T1;Parent=OE9A072177;Name=OE9A072177T1;product=OE9A072177P1
OE9A073696	10.4699	-2.26355	0.771739	-2.93305	0.00335655	0.0378926	OE9A073696	ID=OE9A073696T1;Parent=OE9A073696;Name=OE9A073696T1;product=OE9A073696P1
OE9A009378	4175.92	-2.26311	0.393372	-5.75311	8.7618e-09	6.07382e-07	OE9A009378	ID=OE9A009378T1;Parent=OE9A009378;Name=OE9A009378T1;product=OE9A009378P1;Description=secoisolariciresinol dehydrogenase-like;Ontology_term=GO:0016491
OE9A079047	444.476	-2.25624	0.462958	-4.87354	1.09619e-06	4.95001e-05	OE9A079047	ID=OE9A079047T1;Parent=OE9A079047;Name=OE9A079047T1;product=OE9A079047P1
OE9A003437	22.6751	-2.25549	0.619715	-3.63956	0.000273101	0.00543427	OE9A003437	ID=OE9A003437T1;Parent=OE9A003437;Name=OE9A003437T1;product=OE9A003437P1;Description=uncharacterized protein LOC105167880;Ontology_term=GO:0016021
OE9A107056	893.954	-2.25147	0.401133	-5.61278	1.99099e-08	1.31277e-06	OE9A107056	ID=OE9A107056T1;Parent=OE9A107056;Name=OE9A107056T1;product=OE9A107056P1
OE9A096960	1570.32	-2.24528	0.344438	-6.51867	7.09325e-11	7.27739e-09	OE9A096960	ID=OE9A096960T1;Parent=OE9A096960;Name=OE9A096960T1;product=OE9A096960P1;Description=probable WRKY transcription factor 53;Ontology_term=GO:0003700%2C GO:0005667%2C GO:0006355%2C GO:0043565%2C GO:0045449
OE9A027777	1414.2	-2.24425	0.290189	-7.73374	1.04429e-14	2.2672e-12	OE9A027777	ID=OE9A027777T1;Parent=OE9A027777;Name=OE9A027777T1;product=OE9A027777P1;Description=U-box domain-containing 17;Ontology_term=GO:0004842%2C GO:0005515%2C GO:0005634%2C GO:0005737%2C GO:0009814%2C GO:0016567
OE9A010143	16.7078	-2.23901	0.610583	-3.667	0.000245415	0.00499574	OE9A010143	ID=OE9A010143T1;Parent=OE9A010143;Name=OE9A010143T1;product=OE9A010143P1;Description=phospholipase A1-Ibeta2, chloroplastic;Ontology_term=GO:0016042%2C GO:0016298%2C GO:0052689
OE9A109149	290.258	-2.23667	0.779719	-2.86856	0.00412345	0.0441412	OE9A109149	ID=OE9A109149T1;Parent=OE9A109149;Name=OE9A109149T1;product=OE9A109149P1;Description=disease resistance RPM1-like;Ontology_term=GO:0043531
OE9A099768	235.767	-2.23048	0.371682	-6.00104	1.96061e-09	1.54731e-07	OE9A099768	ID=OE9A099768T1;Parent=OE9A099768;Name=OE9A099768T1;product=OE9A099768P1;Description=ethylene-responsive transcription factor TINY-like;Ontology_term=GO:0003677%2C GO:0003700%2C GO:0005667%2C GO:0006355%2C GO:0045449
OE9A049687	373.555	-2.22016	0.343963	-6.45465	1.0847e-10	1.09104e-08	OE9A049687	ID=OE9A049687T1;Parent=OE9A049687;Name=OE9A049687T1;product=OE9A049687P1
OE9A055303	339.588	-2.21448	0.290977	-7.61048	2.7307e-14	5.26858e-12	OE9A055303	ID=OE9A055303T1;Parent=OE9A055303;Name=OE9A055303T1;product=OE9A055303P1;Description=GPI-anchored LLG1-like;Ontology_term=GO:0016021
OE9A000336	944.324	-2.21376	0.312344	-7.08756	1.36496e-12	1.9131e-10	OE9A000336	ID=OE9A000336T1;Parent=OE9A000336;Name=OE9A000336T1;product=OE9A000336P1;Description=PHLOEM PROTEIN 2-LIKE A10;Ontology_term=GO:0016021
OE9A119931	699.632	-2.20202	0.289343	-7.61042	2.73196e-14	5.26858e-12	OE9A119931	ID=OE9A119931T1;Parent=OE9A119931;Name=OE9A119931T1;product=OE9A119931P1;Description=SRC2-like;Ontology_term=GO:0005515
OE9A068715	14.9897	-2.19507	0.806848	-2.72055	0.00651726	0.0609632	OE9A068715	ID=OE9A068715T1;Parent=OE9A068715;Name=OE9A068715T1;product=OE9A068715P1;Description=receptor 12;Ontology_term=GO:0005515
OE9A090383	274.743	-2.1919	0.356321	-6.15149	7.67577e-10	6.65121e-08	OE9A090383	ID=OE9A090383T1;Parent=OE9A090383;Name=OE9A090383T1;product=OE9A090383P1;Description=probable WRKY transcription factor 48;Ontology_term=GO:0003700%2C GO:0005667%2C GO:0006355%2C GO:0043565%2C GO:0045449
OE9A103609	9.65383	-2.19016	0.866186	-2.52851	0.0114549	0.0895643	OE9A103609	ID=OE9A103609T1;Parent=OE9A103609;Name=OE9A103609T1;product=OE9A103609P1;Description=transcription factor bHLH36-like;Ontology_term=GO:0046983
OE9A051470	1032.9	-2.1742	0.274224	-7.92854	2.21731e-15	5.46845e-13	OE9A051470	ID=OE9A051470T1;Parent=OE9A051470;Name=OE9A051470T1;product=OE9A051470P1
OE9A078014	164.744	-2.17124	0.518458	-4.18788	2.81578e-05	0.000830139	OE9A078014	ID=OE9A078014T1;Parent=OE9A078014;Name=OE9A078014T1;product=OE9A078014P1;Description=glucan endo-1,3-beta-glucosidase 13-like;Ontology_term=GO:0004553%2C GO:0005975%2C GO:0030247%2C GO:0046658
OE9A032760	540.053	-2.16826	0.42161	-5.1428	2.70677e-07	1.40823e-05	OE9A032760	ID=OE9A032760T1;Parent=OE9A032760;Name=OE9A032760T1;product=OE9A032760P1;Description=probable calcium-binding CML45;Ontology_term=GO:0005509
OE9A049638	1984.96	-2.16784	0.271967	-7.97097	1.57433e-15	4.07879e-13	OE9A049638	ID=OE9A049638T1;Parent=OE9A049638;Name=OE9A049638T1;product=OE9A049638P1;Description=calcium-binding allergen Ole e 8-like;Ontology_term=GO:0005509
OE9A014402	35.7267	-2.16491	0.464168	-4.66407	3.10016e-06	0.000126016	OE9A014402	ID=OE9A014402T1;Parent=OE9A014402;Name=OE9A014402T1;product=OE9A014402P1;Description=auxin-responsive SAUR32-like;Ontology_term=GO:0009733
OE9A037502	73.6091	-2.16366	0.380137	-5.69179	1.25716e-08	8.53037e-07	OE9A037502	ID=OE9A037502T1;Parent=OE9A037502;Name=OE9A037502T1;product=OE9A037502P1;Description=heat stress transcription factor B-4-like;Ontology_term=GO:0003700%2C GO:0005634%2C GO:0005667%2C GO:0006355%2C GO:0043565%2C GO:0045449
OE9A074127	9.84943	-2.16277	0.789164	-2.74058	0.00613308	0.0585875	OE9A074127	ID=OE9A074127T1;Parent=OE9A074127;Name=OE9A074127T1;product=OE9A074127P1;Description=replication A 70 kDa DNA-binding subunit A;Ontology_term=GO:0003677%2C GO:0005634%2C GO:0006260%2C GO:0008270
OE9A103895	430.984	-2.1625	0.371969	-5.81366	6.11229e-09	4.35484e-07	OE9A103895	ID=OE9A103895T1;Parent=OE9A103895;Name=OE9A103895T1;product=OE9A103895P1;Description=rust resistance kinase Lr10-like;Ontology_term=GO:0004672%2C GO:0005524%2C GO:0006468
OE9A043560	161.024	-2.15675	0.734118	-2.93788	0.00330461	0.0374547	OE9A043560	ID=OE9A043560T1;Parent=OE9A043560;Name=OE9A043560T1;product=OE9A043560P1
OE9A034668	39.3698	-2.15376	0.423398	-5.08684	3.64076e-07	1.83823e-05	OE9A034668	ID=OE9A034668T1;Parent=OE9A034668;Name=OE9A034668T1;product=OE9A034668P1;Description=glutaredoxin-C9-like;Ontology_term=GO:0005623%2C GO:0006118%2C GO:0009055%2C GO:0015035%2C GO:0045454%2C GO:0055114
OE9A106414	2906.29	-2.15054	0.374223	-5.74668	9.10151e-09	6.29231e-07	OE9A106414	ID=OE9A106414T1;Parent=OE9A106414;Name=OE9A106414T1;product=OE9A106414P1;Description=cytochrome b561 and DOMON domain-containing At5g47530-like;Ontology_term=GO:0016021%2C GO:0055114
OE9A100636	208.403	-2.14972	0.351865	-6.10949	9.9948e-10	8.43279e-08	OE9A100636	ID=OE9A100636T1;Parent=OE9A100636;Name=OE9A100636T1;product=OE9A100636P1;Description=late embryogenesis abundant At1g64065-like;Ontology_term=GO:0016020
OE9A066779	34.6759	-2.14087	0.663724	-3.22553	0.00125738	0.018293	OE9A066779	ID=OE9A066779T1;Parent=OE9A066779;Name=OE9A066779T1;product=OE9A066779P1
OE9A109544	20.8329	-2.14056	0.419806	-5.09893	3.41581e-07	1.73833e-05	OE9A109544	ID=OE9A109544T1;Parent=OE9A109544;Name=OE9A109544T1;product=OE9A109544P1;Description=probable carboxylesterase 12;Ontology_term=GO:0008152%2C GO:0016787
OE9A089783	57.6806	-2.13835	0.387524	-5.518	3.42884e-08	2.13981e-06	OE9A089783	ID=OE9A089783T1;Parent=OE9A089783;Name=OE9A089783T1;product=OE9A089783P1
OE9A097447	125.879	-2.13779	0.414121	-5.16224	2.44014e-07	1.28254e-05	OE9A097447	ID=OE9A097447T1;Parent=OE9A097447;Name=OE9A097447T1;product=OE9A097447P1;Description=phosphoglycerate mutase AT74H;Ontology_term=GO:0005829%2C GO:0015976%2C GO:0016311%2C GO:0050278
OE9A059352	866.767	-2.12498	0.358505	-5.92733	3.07903e-09	2.34344e-07	OE9A059352	ID=OE9A059352T1;Parent=OE9A059352;Name=OE9A059352T1;product=OE9A059352P1;Description=probable E3 ubiquitin- ligase XERICO;Ontology_term=GO:0005515%2C GO:0008270
OE9A108402	259.57	-2.118	0.348963	-6.06941	1.28384e-09	1.05542e-07	OE9A108402	ID=OE9A108402T1;Parent=OE9A108402;Name=OE9A108402T1;product=OE9A108402P1;Description=probable WRKY transcription factor 46;Ontology_term=GO:0003700%2C GO:0005667%2C GO:0006355%2C GO:0043565%2C GO:0045449
OE9A005607	23.2901	-2.11701	0.725062	-2.91976	0.00350299	0.0391154	OE9A005607	ID=OE9A005607T1;Parent=OE9A005607;Name=OE9A005607T1;product=OE9A005607P1
OE9A106296	56.2533	-2.11547	0.538351	-3.92955	8.51061e-05	0.00209691	OE9A106296	ID=OE9A106296T1;Parent=OE9A106296;Name=OE9A106296T1;product=OE9A106296P1;Description=12-oxophytodienoate reductase 11;Ontology_term=GO:0010181%2C GO:0016491%2C GO:0055114
OE9A120113	80.4079	-2.10987	0.517051	-4.08058	4.49227e-05	0.00122317	OE9A120113	ID=OE9A120113T1;Parent=OE9A120113;Name=OE9A120113T1;product=OE9A120113P1;Description=nicotianamine synthase-like;Ontology_term=GO:0030410%2C GO:0030418
OE9A046544	187.277	-2.1088	0.376591	-5.59972	2.14702e-08	1.41033e-06	OE9A046544	ID=OE9A046544T1;Parent=OE9A046544;Name=OE9A046544T1;product=OE9A046544P1
OE9A046006	332.766	-2.10852	0.212357	-9.92913	3.10944e-23	4.43077e-20	OE9A046006	ID=OE9A046006T1;Parent=OE9A046006;Name=OE9A046006T1;product=OE9A046006P1
OE9A103913	363.164	-2.10818	0.294335	-7.1625	7.92211e-13	1.14799e-10	OE9A103913	ID=OE9A103913T1;Parent=OE9A103913;Name=OE9A103913T1;product=OE9A103913P1;Description=calcium-binding CAST-like;Ontology_term=GO:0005509
OE9A084278	828.746	-2.09746	0.393098	-5.33572	9.51653e-08	5.41218e-06	OE9A084278	ID=OE9A084278T1;Parent=OE9A084278;Name=OE9A084278T1;product=OE9A084278P1;Description=LYK5;Ontology_term=GO:0004672%2C GO:0005524%2C GO:0006468%2C GO:0016020
OE9A084147	44.9987	-2.09193	0.477448	-4.38149	1.17871e-05	0.000395231	OE9A084147	ID=OE9A084147T1;Parent=OE9A084147;Name=OE9A084147T1;product=OE9A084147P1
OE9A097771	444.818	-2.0887	0.638802	-3.26972	0.00107653	0.0163191	OE9A097771	ID=OE9A097771T1;Parent=OE9A097771;Name=OE9A097771T1;product=OE9A097771P1;Description=NAC transcription factor 29-like;Ontology_term=GO:0003677%2C GO:0006355%2C GO:0007568%2C GO:0044702%2C GO:0048367%2C GO:0048608
OE9A071927	97.3924	-2.08845	0.357061	-5.849	4.94523e-09	3.5932e-07	OE9A071927	ID=OE9A071927T1;Parent=OE9A071927;Name=OE9A071927T1;product=OE9A071927P1;Description=uncharacterized protein LOC111407381;Ontology_term=GO:0005515%2C GO:0008270
OE9A097302	83.5543	-2.08818	0.362264	-5.76424	8.20258e-09	5.71707e-07	OE9A097302	ID=OE9A097302T1;Parent=OE9A097302;Name=OE9A097302T1;product=OE9A097302P1;Description=uncharacterized protein LOC111407381;Ontology_term=GO:0005515%2C GO:0008270
OE9A082285	34.3268	-2.08673	0.422888	-4.93447	8.03701e-07	3.72769e-05	OE9A082285	ID=OE9A082285T1;Parent=OE9A082285;Name=OE9A082285T1;product=OE9A082285P1
OE9A093966	270.46	-2.08643	0.286891	-7.27255	3.52765e-13	5.48368e-11	OE9A093966	ID=OE9A093966T1;Parent=OE9A093966;Name=OE9A093966T1;product=OE9A093966P1
OE9A017914	151.41	-2.08484	0.435607	-4.78607	1.70079e-06	7.35642e-05	OE9A017914	ID=OE9A017914T1;Parent=OE9A017914;Name=OE9A017914T1;product=OE9A017914P1;Description=GLUTAMINE DUMPER 2-like;Ontology_term=GO:0016020
OE9A013025	38.1713	-2.07948	0.514388	-4.04262	5.28568e-05	0.0014049	OE9A013025	ID=OE9A013025T1;Parent=OE9A013025;Name=OE9A013025T1;product=OE9A013025P1;Description=Serine threonine kinase;Ontology_term=GO:0004674%2C GO:0005509%2C GO:0005515%2C GO:0005524%2C GO:0006468%2C GO:0009069%2C GO:0016021%2C GO:0030247
OE9A100018	1265.36	-2.07595	0.248168	-8.3651	6.00629e-17	2.00072e-14	OE9A100018	ID=OE9A100018T1;Parent=OE9A100018;Name=OE9A100018T1;product=OE9A100018P1;Description=probable phosphatase 2C 63;Ontology_term=GO:0004722%2C GO:0006470%2C GO:0008287%2C GO:0046872
OE9A026401	35.7464	-2.07369	0.588576	-3.52323	0.000426316	0.00787226	OE9A026401	ID=OE9A026401T1;Parent=OE9A026401;Name=OE9A026401T1;product=OE9A026401P1;Description=alpha-mannosidase isoform X1;Ontology_term=GO:0004559%2C GO:0006013%2C GO:0008270%2C GO:0030246
OE9A094183	16.9764	-2.07208	0.601774	-3.44328	0.000574694	0.0100144	OE9A094183	ID=OE9A094183T1;Parent=OE9A094183;Name=OE9A094183T1;product=OE9A094183P1;Description=E3 ubiquitin- ligase ATL23;Ontology_term=GO:0005515%2C GO:0008270%2C GO:0016021%2C GO:0016567%2C GO:0016874%2C GO:0043161%2C GO:0061630
OE9A089494	24.4262	-2.06802	0.731107	-2.82861	0.00467505	0.0482148	OE9A089494	ID=OE9A089494T1;Parent=OE9A089494;Name=OE9A089494T1;product=OE9A089494P1
OE9A102331	4117.53	-2.06741	0.302394	-6.8368	8.09822e-12	9.89101e-10	OE9A102331	ID=OE9A102331T1;Parent=OE9A102331;Name=OE9A102331T1;product=OE9A102331P1;Description=aspartic ase PCS1-like;Ontology_term=GO:0004190%2C GO:0006508%2C GO:0030163
OE9A103454	404.656	-2.05776	0.284568	-7.23119	4.78776e-13	7.18136e-11	OE9A103454	ID=OE9A103454T1;Parent=OE9A103454;Name=OE9A103454T1;product=OE9A103454P1;Description=transcription factor DIVARICATA-like;Ontology_term=GO:0003677%2C GO:0005634%2C GO:0006355
OE9A057570	9.68049	-2.05538	0.807778	-2.54448	0.010944	0.0872829	OE9A057570	ID=OE9A057570T1;Parent=OE9A057570;Name=OE9A057570T1;product=OE9A057570P1
OE9A085764	1198.48	-2.0475	0.327441	-6.25303	4.02575e-10	3.66158e-08	OE9A085764	ID=OE9A085764T1;Parent=OE9A085764;Name=OE9A085764T1;product=OE9A085764P1;Description=probable WRKY transcription factor 46;Ontology_term=GO:0003700%2C GO:0005667%2C GO:0006355%2C GO:0043565%2C GO:0045449
OE9A106046	74.9826	-2.045	0.802746	-2.5475	0.0108497	0.0867742	OE9A106046	ID=OE9A106046T1;Parent=OE9A106046;Name=OE9A106046T1;product=OE9A106046P1
OE9A014829	126.752	-2.04131	0.332948	-6.13102	8.73178e-10	7.46538e-08	OE9A014829	ID=OE9A014829T1;Parent=OE9A014829;Name=OE9A014829T1;product=OE9A014829P1;Description=GPI-anchored LLG1-like;Ontology_term=GO:0016021
OE9A082355	5783.98	-2.04097	0.264231	-7.72418	1.12574e-14	2.39835e-12	OE9A082355	ID=OE9A082355T1;Parent=OE9A082355;Name=OE9A082355T1;product=OE9A082355P1;Description=beta-amylase 1, chloroplastic;Ontology_term=GO:0005634%2C GO:0005829%2C GO:0005983%2C GO:0005985%2C GO:0016161
OE9A106904	68.9116	-2.0319	0.640979	-3.16999	0.00152445	0.0211126	OE9A106904	ID=OE9A106904T1;Parent=OE9A106904;Name=OE9A106904T1;product=OE9A106904P1;Description=non-symbiotic hemoglobin 2;Ontology_term=GO:0006631%2C GO:0019432%2C GO:0019825%2C GO:0020037%2C GO:0046872
OE9A083464	65.1984	-2.03151	0.388488	-5.22927	1.70182e-07	9.20886e-06	OE9A083464	ID=OE9A083464T1;Parent=OE9A083464;Name=OE9A083464T1;product=OE9A083464P1
OE9A071260	98.7599	-2.02948	0.377107	-5.38172	7.37795e-08	4.32048e-06	OE9A071260	ID=OE9A071260T1;Parent=OE9A071260;Name=OE9A071260T1;product=OE9A071260P1;Description=mitogen-activated kinase kinase kinase NPK1-like;Ontology_term=GO:0004672%2C GO:0005524%2C GO:0006468
OE9A104433	19.0657	-2.02237	0.560832	-3.60602	0.000310926	0.00606922	OE9A104433	ID=OE9A104433T1;Parent=OE9A104433;Name=OE9A104433T1;product=OE9A104433P1;Description=21 kDa -like;Ontology_term=GO:0004857%2C GO:0043086
OE9A031595	12.1794	-2.02029	0.74173	-2.72376	0.00645439	0.0606405	OE9A031595	ID=OE9A031595T1;Parent=OE9A031595;Name=OE9A031595T1;product=OE9A031595P1;Description=GATA transcription factor 8-like;Ontology_term=GO:0000785%2C GO:0000977%2C GO:0001085%2C GO:0001228%2C GO:0003682%2C GO:0005634%2C GO:0005667%2C GO:0008270%2C GO:0030154%2C GO:0045893
OE9A100613	305.173	-2.01839	0.38014	-5.30961	1.09859e-07	6.16583e-06	OE9A100613	ID=OE9A100613T1;Parent=OE9A100613;Name=OE9A100613T1;product=OE9A100613P1;Description=U-box domain-containing 4-like;Ontology_term=GO:0005515%2C GO:0005634%2C GO:0005737
OE9A054842	42.292	-2.01519	0.404133	-4.98646	6.14971e-07	2.9156e-05	OE9A054842	ID=OE9A054842T1;Parent=OE9A054842;Name=OE9A054842T1;product=OE9A054842P1
OE9A115995	31.3588	-2.01256	0.614633	-3.27441	0.00105883	0.016107	OE9A115995	ID=OE9A115995T1;Parent=OE9A115995;Name=OE9A115995T1;product=OE9A115995P1;Description=acyltransferase At1g54570, chloroplastic isoform X1;Ontology_term=GO:0004144%2C GO:0010287%2C GO:0033306%2C GO:0042967%2C GO:0046486
OE9A008031	26.2699	-2.00307	0.768757	-2.6056	0.00917138	0.0772747	OE9A008031	ID=OE9A008031T1;Parent=OE9A008031;Name=OE9A008031T1;product=OE9A008031P1;Description=carotenoid cleavage dioxygenase 8 homolog B, chloroplastic;Ontology_term=GO:0016702%2C GO:0055114
OE9A026934	5.54142	-2.0006	0.718263	-2.78533	0.00534735	0.0533882	OE9A026934	ID=OE9A026934T1;Parent=OE9A026934;Name=OE9A026934T1;product=OE9A026934P1;Description=pectinesterase 3;Ontology_term=GO:0005618%2C GO:0005768%2C GO:0005774%2C GO:0005802%2C GO:0005886%2C GO:0005982%2C GO:0005985%2C GO:0009506%2C GO:0016021%2C GO:0030599%2C GO:0042545%2C GO:0043086%2C GO:0045330%2C GO:0045490%2C GO:0046910

## Sheet: ShinyGO DOWN FC <-2
	Enrichment FDR	nGenes	Pathway Genes	Fold Enrichment	Pathways (click for details)	Genes
	9.6e-22	53	1164	5.7	GO:0003700 Transcription factor activity, sequence-specific DNA binding	OE9A000299 OE9A002219 OE9A004162 OE9A005875 OE9A009930 OE9A012128 OE9A016967 OE9A019029 OE9A025785 OE9A028341 OE9A033879 OE9A035702 OE9A037502 OE9A042501 OE9A043064 OE9A043316 OE9A043605 OE9A045301 OE9A046042 OE9A047454 OE9A051495 OE9A053339 OE9A053907 OE9A056651 OE9A066307 OE9A073838 OE9A075123 OE9A076184 OE9A079911 OE9A081134 OE9A081748 OE9A084330 OE9A085764 OE9A086962 OE9A087855 OE9A089778 OE9…
	2e-13	57	2097	3.4	GO:0006355 Reg. of transcription, DNA-templated	OE9A000299 OE9A002219 OE9A004162 OE9A005875 OE9A009930 OE9A012128 OE9A015716 OE9A016967 OE9A019029 OE9A025785 OE9A028341 OE9A031590 OE9A033879 OE9A035702 OE9A037502 OE9A042501 OE9A043064 OE9A043316 OE9A043605 OE9A045301 OE9A046042 OE9A047454 OE9A051495 OE9A053339 OE9A053907 OE9A056651 OE9A061095 OE9A066307 OE9A073838 OE9A075123 OE9A076184 OE9A079911 OE9A081134 OE9A081748 OE9A084330 OE9A085764 OE9…
	1.3e-12	29	588	6.1	GO:0005509 Calcium ion binding	OE9A001028 OE9A002067 OE9A006276 OE9A006330 OE9A013025 OE9A016940 OE9A020249 OE9A023580 OE9A024278 OE9A024806 OE9A027095 OE9A030371 OE9A032760 OE9A039140 OE9A049638 OE9A051537 OE9A051863 OE9A057599 OE9A058655 OE9A068607 OE9A077755 OE9A089257 OE9A090940 OE9A103265 OE9A103913 OE9A105546 OE9A114342 OE9A115883 OE9A118456
	1.5e-10	56	2430	2.9	GO:0005667 Transcription factor complex	OE9A000299 OE9A000795 OE9A002219 OE9A004162 OE9A005875 OE9A009930 OE9A012128 OE9A016967 OE9A019029 OE9A025785 OE9A028341 OE9A031595 OE9A033879 OE9A035702 OE9A037502 OE9A042501 OE9A043064 OE9A043316 OE9A043605 OE9A045301 OE9A046042 OE9A047454 OE9A051495 OE9A053339 OE9A053907 OE9A056651 OE9A066307 OE9A073838 OE9A075123 OE9A076184 OE9A078448 OE9A079911 OE9A081134 OE9A081748 OE9A084330 OE9A085764 OE9…
	4.2e-07	9	73	15.3	GO:0016762 Xyloglucan:xyloglucosyl transferase activity	OE9A008141 OE9A032361 OE9A038318 OE9A041022 OE9A045524 OE9A090630 OE9A090863 OE9A100291 OE9A112468
	4.2e-07	50	2562	2.4	GO:0003677 DNA binding	OE9A000299 OE9A002219 OE9A005875 OE9A009930 OE9A015716 OE9A016967 OE9A019029 OE9A022439 OE9A022911 OE9A025785 OE9A028341 OE9A031590 OE9A033879 OE9A035702 OE9A041554 OE9A042501 OE9A043064 OE9A043316 OE9A045301 OE9A046042 OE9A047454 OE9A051495 OE9A052054 OE9A053339 OE9A061095 OE9A066307 OE9A067469 OE9A073838 OE9A074127 OE9A075123 OE9A076184 OE9A079777 OE9A079911 OE9A081748 OE9A084330 OE9A085648 OE9…
	1.9e-06	9	89	12.6	GO:0042546 Cell wall biogenesis	OE9A008141 OE9A032361 OE9A038318 OE9A041022 OE9A045524 OE9A090630 OE9A090863 OE9A100291 OE9A112468
	7.9e-06	15	355	5.3	GO:0016567 Protein ubiquitination	OE9A002619 OE9A020210 OE9A027777 OE9A041636 OE9A045269 OE9A045980 OE9A071166 OE9A072034 OE9A075686 OE9A076093 OE9A087938 OE9A094183 OE9A101335 OE9A115663 OE9A116163
	7.9e-06	14	307	5.7	GO:0004842 Ubiquitin-protein transferase activity	OE9A002619 OE9A020210 OE9A027777 OE9A041636 OE9A045269 OE9A045980 OE9A071166 OE9A072034 OE9A075686 OE9A076093 OE9A087938 OE9A101335 OE9A115663 OE9A116163
	1.7e-05	11	195	7	GO:0048046 Apoplast	OE9A008141 OE9A032361 OE9A038318 OE9A041022 OE9A041775 OE9A045524 OE9A090630 OE9A090863 OE9A100291 OE9A112468 OE9A120253
	3.9e-05	9	134	8.4	GO:0010411 Xyloglucan metabolic process	OE9A008141 OE9A032361 OE9A038318 OE9A041022 OE9A045524 OE9A090630 OE9A090863 OE9A100291 OE9A112468
	0.00047	12	334	4.5	GO:0004553 Hydrolase activity, hydrolyzing O-glycosyl compounds	OE9A008141 OE9A032361 OE9A038318 OE9A041022 OE9A045524 OE9A078014 OE9A083347 OE9A087360 OE9A090630 OE9A090863 OE9A100291 OE9A112468
	0.0006	3	8	46.7	GO:0009814 Defense response, incompatible interaction	OE9A027777 OE9A041636 OE9A072034
	0.001	17	686	3.1	GO:0043565 Sequence-specific DNA binding	OE9A004162 OE9A012128 OE9A037502 OE9A043605 OE9A053907 OE9A056651 OE9A081134 OE9A085764 OE9A086962 OE9A087855 OE9A089778 OE9A090383 OE9A096960 OE9A097645 OE9A104316 OE9A108402 OE9A117461
	0.0026	3	13	28.7	GO:0003830 Beta-1,4-mannosylglycoprotein 4-beta-N-acetylglucosaminyltransferase activity	OE9A042020 OE9A050550 OE9A081767
	0.0027	4	34	14.6	GO:0030014 CCR4-NOT complex	OE9A023470 OE9A077596 OE9A098762 OE9A105623
	0.0045	6	110	6.8	GO:0006887 Exocytosis	OE9A052076 OE9A075408 OE9A087218 OE9A100009 OE9A102076 OE9A120487
	0.005	3	17	22	GO:0001085 RNA polymerase II transcription factor binding	OE9A000795 OE9A031595 OE9A078448
	0.0079	27	1667	2	GO:0046872 Metal ion binding	OE9A000364 OE9A006386 OE9A008777 OE9A013985 OE9A015091 OE9A020845 OE9A021431 OE9A032354 OE9A040726 OE9A042937 OE9A043040 OE9A043154 OE9A048147 OE9A049811 OE9A055375 OE9A069420 OE9A072934 OE9A078302 OE9A081102 OE9A087855 OE9A098086 OE9A099186 OE9A100018 OE9A101780 OE9A101792 OE9A104718 OE9A106904
	0.011	3	23	16.2	GO:0090503 RNA phosphodiester bond hydrolysis, exonucleolytic	OE9A023470 OE9A077596 OE9A098762
