# Supplementary material for: Comparative transcriptomics of biopesticide-treated olives subjected to Xylella infection
Source: Research Square preprint supplement (doi:10.21203/rs.3.rs-8603179/v1), 2026-01-29
Supplement: Supplementary file 2 [file 13218599843cd46152a1ee80.xlsx]

## Sheet: UP_DOWN  2<FC<-2
List of Differential Expressed Genes (DEGs) in T6_Infect_vs_Mock; (AA25,AA26,AA27) vs (AA28,AA29,AA30)
ID	baseMean	log2FoldChange	lfcSE	stat	pvalue	padj	Description
OE9A085366	65.4165	3.30611	0.62686	5.27409	1.33418e-07	0.000674897	ID=OE9A085366T1;Parent=OE9A085366;Name=OE9A085366T1;product=OE9A085366P1;Description=organic cation carnitine transporter 3-like;Ontology_term=GO:0016021%2C GO:0022857%2C GO:0055085
OE9A120982	54.1555	3.15039	0.650309	4.84445	1.26966e-06	0.00367004	ID=OE9A120982T1;Parent=OE9A120982;Name=OE9A120982T1;product=OE9A120982P1;Description=premnaspirodiene oxygenase-like;Ontology_term=GO:0004497%2C GO:0005506%2C GO:0016021%2C GO:0016705%2C GO:0020037%2C GO:0055114
OE9A030206	90.2456	2.90358	0.683604	4.24745	2.16217e-05	0.017592	ID=OE9A030206T1;Parent=OE9A030206;Name=OE9A030206T1;product=OE9A030206P1;Description=premnaspirodiene oxygenase-like;Ontology_term=GO:0004497%2C GO:0005506%2C GO:0016021%2C GO:0016705%2C GO:0020037%2C GO:0055114
OE9A062996	43.0508	2.90286	0.761539	3.81183	0.00013794	0.0581473	ID=OE9A062996T1;Parent=OE9A062996;Name=OE9A062996T1;product=OE9A062996P1
OE9A066969	54.5516	2.82999	0.725316	3.90173	9.5506e-05	0.0455414	ID=OE9A066969T1;Parent=OE9A066969;Name=OE9A066969T1;product=OE9A066969P1;Description=alpha carbonic anhydrase 7;Ontology_term=GO:0004089%2C GO:0006730%2C GO:0006807%2C GO:0008270
OE9A055796	35.1785	2.78126	0.601367	4.62489	3.74797e-06	0.0063197	ID=OE9A055796T1;Parent=OE9A055796;Name=OE9A055796T1;product=OE9A055796P1;Description=UDP-glycosyltransferase 76B1-like;Ontology_term=GO:0009813%2C GO:0043231%2C GO:0052696%2C GO:0080043%2C GO:0080044
OE9A112727	69.1384	2.70032	0.742284	3.63785	0.000274921	0.0855657	ID=OE9A112727T1;Parent=OE9A112727;Name=OE9A112727T1;product=OE9A112727P1;Description=crocetin glucosyltransferase, chloroplastic-like;Ontology_term=GO:0009813%2C GO:0043231%2C GO:0052696%2C GO:0080043%2C GO:0080044
OE9A096921	166.803	2.60578	0.562738	4.63055	3.64697e-06	0.0063197	ID=OE9A096921T1;Parent=OE9A096921;Name=OE9A096921T1;product=OE9A096921P1;Description=pathogenesis-related STH-2-like;Ontology_term=GO:0006952%2C GO:0009607
OE9A095595	69.1633	2.56419	0.47324	5.41838	6.01408e-08	0.00040563	ID=OE9A095595T1;Parent=OE9A095595;Name=OE9A095595T1;product=OE9A095595P1;Description=probable LRR receptor-like serine threonine- kinase At3g47570;Ontology_term=GO:0004672%2C GO:0005515%2C GO:0005524%2C GO:0006468
OE9A046683	32.1801	2.51923	0.56415	4.46553	7.98716e-06	0.0106481	ID=OE9A046683T1;Parent=OE9A046683;Name=OE9A046683T1;product=OE9A046683P1;Description=serine carboxypeptidase-like 50;Ontology_term=GO:0004185%2C GO:0006508
OE9A047084	913.772	2.48363	0.455851	5.44834	5.08423e-08	0.00040563	ID=OE9A047084T1;Parent=OE9A047084;Name=OE9A047084T1;product=OE9A047084P1;Description=pathogenesis-related STH-2-like;Ontology_term=GO:0006952%2C GO:0009607
OE9A119429	24.9622	2.41078	0.604411	3.98865	6.64518e-05	0.0361774	ID=OE9A119429T1;Parent=OE9A119429;Name=OE9A119429T1;product=OE9A119429P1;Description=premnaspirodiene oxygenase-like;Ontology_term=GO:0005506%2C GO:0016020%2C GO:0016705%2C GO:0020037%2C GO:0055114
OE9A051438	203.793	2.31446	0.493312	4.69167	2.70981e-06	0.0063197	ID=OE9A051438T1;Parent=OE9A051438;Name=OE9A051438T1;product=OE9A051438P1;Description=pathogenesis-related STH-2-like;Ontology_term=GO:0006952%2C GO:0009607
OE9A090761	62.1519	2.27439	0.491052	4.63167	3.62724e-06	0.0063197	ID=OE9A090761T1;Parent=OE9A090761;Name=OE9A090761T1;product=OE9A090761P1;Description=premnaspirodiene oxygenase-like;Ontology_term=GO:0004497%2C GO:0005506%2C GO:0016705%2C GO:0020037%2C GO:0055114
OE9A035730	147.46	2.25376	0.508736	4.43012	9.41823e-06	0.0112099	ID=OE9A035730T1;Parent=OE9A035730;Name=OE9A035730T1;product=OE9A035730P1;Description=lachrymatory-factor synthase;Ontology_term=GO:0004864%2C GO:0004872%2C GO:0005634%2C GO:0005737%2C GO:0009738%2C GO:0010427%2C GO:0080163
OE9A038120	119.572	2.25219	0.600803	3.74863	0.0001778	0.0705412	ID=OE9A038120T1;Parent=OE9A038120;Name=OE9A038120T1;product=OE9A038120P1;Description=pathogenesis-related STH-2-like;Ontology_term=GO:0006952%2C GO:0009607
OE9A031523	114.867	2.24134	0.513113	4.36813	1.25317e-05	0.0133456	ID=OE9A031523T1;Parent=OE9A031523;Name=OE9A031523T1;product=OE9A031523P1;Description=lachrymatory-factor synthase;Ontology_term=GO:0004864%2C GO:0004872%2C GO:0005634%2C GO:0005737%2C GO:0009738%2C GO:0010427%2C GO:0080163
OE9A060994	129.645	2.19868	0.616215	3.56804	0.000359662	0.0982804	ID=OE9A060994T1;Parent=OE9A060994;Name=OE9A060994T1;product=OE9A060994P1;Description=SRG1-like;Ontology_term=GO:0051213%2C GO:0055114
OE9A013138	184.337	2.16766	0.467141	4.64026	3.47967e-06	0.0063197	ID=OE9A013138T1;Parent=OE9A013138;Name=OE9A013138T1;product=OE9A013138P1;Description=premnaspirodiene oxygenase-like;Ontology_term=GO:0005506%2C GO:0016020%2C GO:0016709%2C GO:0020037%2C GO:0044550%2C GO:0055114
OE9A025758	174.243	2.12392	0.413625	5.13489	2.82315e-07	0.00114247	ID=OE9A025758T1;Parent=OE9A025758;Name=OE9A025758T1;product=OE9A025758P1;Description=beta-1,3-galactosyltransferase 7-like;Ontology_term=GO:0000139%2C GO:0006486%2C GO:0008378%2C GO:0016021
OE9A048916	45.9529	2.00047	0.445926	4.4861	7.25376e-06	0.0104837	ID=OE9A048916T1;Parent=OE9A048916;Name=OE9A048916T1;product=OE9A048916P1
OE9A004387	30.0671	-2.08649	0.475262	-4.39019	1.1325e-05	0.0127306	ID=OE9A004387T1;Parent=OE9A004387;Name=OE9A004387T1;product=OE9A004387P1;Description=Armadillo repeat VAC8;Ontology_term=GO:0005515%2C GO:0005634%2C GO:0005737
OE9A034186	44.2662	-2.09538	0.59069	-3.54735	0.000389134	0.0982804	ID=OE9A034186T1;Parent=OE9A034186;Name=OE9A034186T1;product=OE9A034186P1;Description=lipid transfer;Ontology_term=GO:0006869%2C GO:0008289
OE9A015262	34.282	-2.23142	0.611175	-3.65103	0.000261188	0.0845723	ID=OE9A015262T1;Parent=OE9A015262;Name=OE9A015262T1;product=OE9A015262P1

## Sheet: ShinyGO UP FC >2
Enrichment FDR	nGenes	Pathway Genes	Fold Enrichment	Pathways (click for details)	Genes
1.6e-06	4	94	112.9	GO:0009607 Response to biotic stimulus	OE9A038120 OE9A047084 OE9A051438 OE9A096921
2.3e-05	4	217	48.9	GO:0006952 Defense response	OE9A038120 OE9A047084 OE9A051438 OE9A096921
4.9e-05	5	664	20	GO:0005506 Iron ion binding	OE9A013138 OE9A030206 OE9A090761 OE9A119429 OE9A120982
5.5e-05	5	722	18.4	GO:0020037 Heme binding	OE9A013138 OE9A030206 OE9A090761 OE9A119429 OE9A120982
0.00011	4	406	26.1	GO:0016705 Oxidoreductase activity, acting on paired donors, with incorporation or reduction of mole	OE9A030206 OE9A090761 OE9A119429 OE9A120982
0.00034	2	33	160.8	GO:0010427 Abscisic acid binding	OE9A031523 OE9A035730
0.00034	2	34	156.1	GO:0004864 Protein phosphatase inhibitor activity	OE9A031523 OE9A035730
0.00034	2	33	160.8	GO:0004872 Receptor activity	OE9A031523 OE9A035730
0.0007	3	291	27.4	GO:0004497 Monooxygenase activity	OE9A030206 OE9A090761 OE9A120982
0.00085	2	60	88.5	GO:0080163 Reg. of protein serine/threonine phosphatase activity	OE9A031523 OE9A035730
0.0013	6	2739	5.8	GO:0055114 Oxidation-reduction process	OE9A013138 OE9A030206 OE9A060994 OE9A090761 OE9A119429 OE9A120982
0.003	2	130	40.8	GO:0080043 Quercetin 3-O-glucosyltransferase activity	OE9A055796 OE9A112727
0.003	2	130	40.8	GO:0080044 Quercetin 7-O-glucosyltransferase activity	OE9A055796 OE9A112727
0.0032	2	139	38.2	GO:0052696 Flavonoid glucuronidation	OE9A055796 OE9A112727
0.0044	2	168	31.6	GO:0009813 Flavonoid biosynthetic process	OE9A055796 OE9A112727
0.0053	2	192	27.6	GO:0009738 Abscisic acid-activated signaling pathway	OE9A031523 OE9A035730
0.016	1	20	132.7	GO:0004089 Carbonate dehydratase activity	OE9A066969
0.028	1	37	71.7	GO:0008378 Galactosyltransferase activity	OE9A025758
0.033	2	538	9.9	GO:0043231 Intracellular membrane-bounded organelle	OE9A055796 OE9A112727
0.033	1	51	52	GO:0006730 One-carbon metabolic process	OE9A066969
										http://amigo.geneontology.org/amigo/term/GO:0006807	OE9A066969
										http://amigo.geneontology.org/amigo/term/GO:0022857	OE9A085366
										http://amigo.geneontology.org/amigo/term/GO:0016709	OE9A013138
										http://amigo.geneontology.org/amigo/term/GO:0044550	OE9A013138
										http://amigo.geneontology.org/amigo/term/GO:0004185	OE9A046683
										http://amigo.geneontology.org/amigo/term/GO:0006486	OE9A025758
										http://amigo.geneontology.org/amigo/term/GO:0051213	OE9A060994
										http://amigo.geneontology.org/amigo/term/GO:0000139	OE9A025758
