# Supplementary material for: Comparative transcriptomics of biopesticide-treated olives subjected to Xylella infection
Source: Research Square preprint supplement (doi:10.21203/rs.3.rs-8603179/v1), 2026-01-29
Supplement: Supplementary file 3 [file 1b7765be0898073b45404566.xlsx]

## Sheet: UP FC >2
List of Differential Expressed Genes (DEGs) FC >2 in T6_PsJNInfect
ID	baseMean	log2FoldChange	lfcSE	stat	pvalue	padj	id gene	Description
OE9A074401	19.4695	4.98545	1.32098	3.77405	0.000160619	0.0337934	OE9A074401	ID=OE9A074401T1;Parent=OE9A074401;Name=OE9A074401T1;product=OE9A074401P1;Description=exocyst complex component EXO70A1-like;Ontology_term=GO:0000145%2C GO:0006887
OE9A033397	14.8522	4.64267	1.26964	3.65669	0.000255497	0.0429678	OE9A033397	ID=OE9A033397T1;Parent=OE9A033397;Name=OE9A033397T1;product=OE9A033397P1;Description=delta(24)-sterol reductase;Ontology_term=GO:0005516%2C GO:0008202%2C GO:0016021%2C GO:0016614%2C GO:0050614%2C GO:0050660%2C GO:0055114
OE9A031500	27.7485	4.33302	1.11796	3.87582	0.000106267	0.0278337	OE9A031500	ID=OE9A031500T1;Parent=OE9A031500;Name=OE9A031500T1;product=OE9A031500P1;Description=uncharacterized protein LOC111375171;Ontology_term=GO:0016021
OE9A015659	1054.11	4.14771	1.14087	3.63558	0.000277356	0.0451853	OE9A015659	ID=OE9A015659T1;Parent=OE9A015659;Name=OE9A015659T1;product=OE9A015659P1;Description=kirola-like;Ontology_term=GO:0006952%2C GO:0009607
OE9A094563	32.2601	4.08743	1.16341	3.51332	0.000442539	0.0619228	OE9A094563	ID=OE9A094563T1;Parent=OE9A094563;Name=OE9A094563T1;product=OE9A094563P1;Description=CUB and sushi domain-containing 3;Ontology_term=GO:0006118%2C GO:0009055
OE9A012292	23.0027	3.82645	1.14405	3.34467	0.000823814	0.0831396	OE9A012292	ID=OE9A012292T1;Parent=OE9A012292;Name=OE9A012292T1;product=OE9A012292P1
OE9A090870	102.159	3.7572	1.1045	3.40173	0.000669618	0.0767708	OE9A090870	ID=OE9A090870T1;Parent=OE9A090870;Name=OE9A090870T1;product=OE9A090870P1
OE9A037077	38.6015	3.6376	1.05439	3.44996	0.000560669	0.0718412	OE9A037077	ID=OE9A037077T1;Parent=OE9A037077;Name=OE9A037077T1;product=OE9A037077P1
OE9A050860	39.648	3.52051	0.972637	3.61956	0.000295109	0.0477364	OE9A050860	ID=OE9A050860T1;Parent=OE9A050860;Name=OE9A050860T1;product=OE9A050860P1
OE9A002141	24.9973	3.44704	0.971235	3.54913	0.00038651	0.0577707	OE9A002141	ID=OE9A002141T2;Parent=OE9A002141;Name=OE9A002141T2;product=OE9A002141P2;Description=squalene synthase;Ontology_term=GO:0004310%2C GO:0006694%2C GO:0016021%2C GO:0016114%2C GO:0051996
OE9A085366	65.4165	3.42733	0.690797	4.96141	6.99832e-07	0.0023641	OE9A085366	ID=OE9A085366T1;Parent=OE9A085366;Name=OE9A085366T1;product=OE9A085366P1;Description=organic cation carnitine transporter 3-like;Ontology_term=GO:0016021%2C GO:0022857%2C GO:0055085
OE9A118576	20.6137	3.35303	0.837493	4.00365	6.23717e-05	0.0233209	OE9A118576	ID=OE9A118576T1;Parent=OE9A118576;Name=OE9A118576T1;product=OE9A118576P1
OE9A048201	21.1672	3.34375	1.00299	3.33378	0.000856754	0.0845924	OE9A048201	ID=OE9A048201T1;Parent=OE9A048201;Name=OE9A048201T1;product=OE9A048201P1;Description=UDP-glycosyltransferase 90A1-like;Ontology_term=GO:0008194%2C GO:0009813%2C GO:0016758%2C GO:0043231%2C GO:0052696
OE9A058077	94.909	3.30537	0.658006	5.02331	5.0788e-07	0.00231674	OE9A058077	ID=OE9A058077T2;Parent=OE9A058077;Name=OE9A058077T2;product=OE9A058077P2
OE9A091063	107.794	3.29561	0.620268	5.31321	1.0771e-07	0.000697116	OE9A091063	ID=OE9A091063T1;Parent=OE9A091063;Name=OE9A091063T1;product=OE9A091063P1;Description=Mediator of RNA polymerase II transcription subunit 18,;Ontology_term=GO:0016020
OE9A067577	30.3712	3.2583	0.661132	4.92836	8.29218e-07	0.0023641	OE9A067577	ID=OE9A067577T1;Parent=OE9A067577;Name=OE9A067577T1;product=OE9A067577P1;Description=membrane PM19L;Ontology_term=GO:0005739%2C GO:0016021
OE9A095209	311.525	3.18874	0.771593	4.13268	3.58565e-05	0.0174003	OE9A095209	ID=OE9A095209T1;Parent=OE9A095209;Name=OE9A095209T1;product=OE9A095209P1;Description=thaumatin;Ontology_term=GO:0005515%2C GO:0005576%2C GO:0031640%2C GO:0050832
OE9A100407	27.1609	3.18425	0.800398	3.97833	6.94e-05	0.025125	OE9A100407	ID=OE9A100407T1;Parent=OE9A100407;Name=OE9A100407T1;product=OE9A100407P1
OE9A119079	49.0176	3.11504	0.672431	4.6325	3.61281e-06	0.00484711	OE9A119079	ID=OE9A119079T1;Parent=OE9A119079;Name=OE9A119079T1;product=OE9A119079P1;Description=plant cysteine oxidase 2-like;Ontology_term=GO:0016702%2C GO:0055114
OE9A033203	38.1704	3.10717	0.705506	4.40417	1.0619e-05	0.00864991	OE9A033203	ID=OE9A033203T1;Parent=OE9A033203;Name=OE9A033203T1;product=OE9A033203P1;Description=vinorine synthase-like;Ontology_term=GO:0016747
OE9A115525	89.7963	3.08005	0.661439	4.65659	3.2149e-06	0.00484711	OE9A115525	ID=OE9A115525T1;Parent=OE9A115525;Name=OE9A115525T1;product=OE9A115525P1;Description=ABC transporter G family member 6-like;Ontology_term=GO:0005524%2C GO:0005886%2C GO:0010345%2C GO:0015416%2C GO:0015716%2C GO:0015748%2C GO:0016021%2C GO:0055085
OE9A112556	39.5598	3.06484	0.774079	3.95933	7.51601e-05	0.0263731	OE9A112556	ID=OE9A112556T1;Parent=OE9A112556;Name=OE9A112556T1;product=OE9A112556P1;Description=polyamine oxidase 1;Ontology_term=GO:0006598%2C GO:0046592%2C GO:0050660%2C GO:0055114
OE9A082511	860.2	3.06185	0.853655	3.58675	0.000334819	0.0524583	OE9A082511	ID=OE9A082511T1;Parent=OE9A082511;Name=OE9A082511T1;product=OE9A082511P1;Description=tyrosine DOPA decarboxylase 1-like;Ontology_term=GO:0004058%2C GO:0004837%2C GO:0006547%2C GO:0006558%2C GO:0006568%2C GO:0006570%2C GO:0009821%2C GO:0030170%2C GO:0042432
OE9A004056	71.3996	3.06015	0.911598	3.35691	0.000788198	0.0817146	OE9A004056	ID=OE9A004056T1;Parent=OE9A004056;Name=OE9A004056T1;product=OE9A004056P1;Description=premnaspirodiene oxygenase-like;Ontology_term=GO:0004497%2C GO:0005506%2C GO:0016021%2C GO:0016705%2C GO:0020037%2C GO:0055114
OE9A103337	23.6565	3.05483	0.820089	3.725	0.000195312	0.0371496	OE9A103337	ID=OE9A103337T1;Parent=OE9A103337;Name=OE9A103337T1;product=OE9A103337P1;Description=cysteine protease XCP1-like;Ontology_term=GO:0006508%2C GO:0008234
OE9A069640	28.5844	3.04245	0.790863	3.84699	0.000119576	0.0287879	OE9A069640	ID=OE9A069640T1;Parent=OE9A069640;Name=OE9A069640T1;product=OE9A069640P1;Description=probable inactive receptor kinase At1g48480;Ontology_term=GO:0004672%2C GO:0005524%2C GO:0006468%2C GO:0016021
OE9A077701	175.105	3.01922	0.865408	3.48878	0.000485236	0.0653312	OE9A077701	ID=OE9A077701T1;Parent=OE9A077701;Name=OE9A077701T1;product=OE9A077701P1;Description=bifunctional pinoresinol-lariciresinol reductase;Ontology_term=GO:0010283%2C GO:0010284%2C GO:0055114%2C GO:1902125%2C GO:1902129%2C GO:1902131%2C GO:1902132%2C GO:1902138
OE9A030206	90.2456	3.01577	0.686461	4.39321	1.1169e-05	0.00875941	OE9A030206	ID=OE9A030206T1;Parent=OE9A030206;Name=OE9A030206T1;product=OE9A030206P1;Description=premnaspirodiene oxygenase-like;Ontology_term=GO:0004497%2C GO:0005506%2C GO:0016021%2C GO:0016705%2C GO:0020037%2C GO:0055114
OE9A083511	115.548	3.01417	0.81112	3.71607	0.000202348	0.0371496	OE9A083511	ID=OE9A083511T1;Parent=OE9A083511;Name=OE9A083511T1;product=OE9A083511P1;Description=organic cation carnitine transporter 3-like;Ontology_term=GO:0016021%2C GO:0022857%2C GO:0055085
OE9A086146	45.4065	2.97723	0.859984	3.46197	0.000536245	0.0694925	OE9A086146	ID=OE9A086146T1;Parent=OE9A086146;Name=OE9A086146T1;product=OE9A086146P1;Description=Phosphoenolpyruvate phosphate translocator 1, chloroplastic;Ontology_term=GO:0005739%2C GO:0009941%2C GO:0015120%2C GO:0015121%2C GO:0015713%2C GO:0016021%2C GO:0034219%2C GO:0089722
OE9A089885	569.202	2.97572	0.783097	3.79994	0.000144733	0.0323701	OE9A089885	ID=OE9A089885T2;Parent=OE9A089885;Name=OE9A089885T2;product=OE9A089885P2;Description=pleiotropic drug resistance 1-like;Ontology_term=GO:0005524%2C GO:0005886%2C GO:0016021%2C GO:0042626%2C GO:0055085
OE9A115301	42.4837	2.97046	0.906582	3.27654	0.00105086	0.0927784	OE9A115301	ID=OE9A115301T1;Parent=OE9A115301;Name=OE9A115301T1;product=OE9A115301P1
OE9A041746	82.2366	2.96317	0.63282	4.68249	2.83415e-06	0.00461724	OE9A041746	ID=OE9A041746T1;Parent=OE9A041746;Name=OE9A041746T1;product=OE9A041746P1;Description=non-symbiotic hemoglobin 1;Ontology_term=GO:0019825%2C GO:0020037%2C GO:0046872
OE9A017968	16.9917	2.94744	0.764748	3.85413	0.000116142	0.0287879	OE9A017968	ID=OE9A017968T1;Parent=OE9A017968;Name=OE9A017968T1;product=OE9A017968P1;Description=TOG array regulator of axonemal microtubules 1;Ontology_term=GO:0005488
OE9A014008	34.9053	2.88733	0.664437	4.34554	1.38936e-05	0.0102221	OE9A014008	ID=OE9A014008T1;Parent=OE9A014008;Name=OE9A014008T1;product=OE9A014008P1;Description=LIM domain-containing WLIM1-like;Ontology_term=GO:0008270
OE9A118237	26.6635	2.84517	0.798912	3.56131	0.000369012	0.0563687	OE9A118237	ID=OE9A118237T1;Parent=OE9A118237;Name=OE9A118237T1;product=OE9A118237P1
OE9A047382	78.0641	2.83404	0.693044	4.08926	4.32752e-05	0.018623	OE9A047382	ID=OE9A047382T1;Parent=OE9A047382;Name=OE9A047382T1;product=OE9A047382P1;Description=dirigent 23-like;Ontology_term=GO:0009699%2C GO:0042349%2C GO:0050790
OE9A121845	46.929	2.8045	0.834391	3.36114	0.000776227	0.0815416	OE9A121845	ID=OE9A121845T1;Parent=OE9A121845;Name=OE9A121845T1;product=OE9A121845P1;Description=transcription factor MYB63-like;Ontology_term=GO:0003677
OE9A004824	14.8023	2.78196	0.845768	3.28928	0.00100445	0.0912731	OE9A004824	ID=OE9A004824T1;Parent=OE9A004824;Name=OE9A004824T1;product=OE9A004824P1;Description=Isopenicillin N synthase;Ontology_term=GO:0005506%2C GO:0016491%2C GO:0055114
OE9A104121	18.2296	2.76385	0.851758	3.24487	0.00117504	0.0957219	OE9A104121	ID=OE9A104121T1;Parent=OE9A104121;Name=OE9A104121T1;product=OE9A104121P1
OE9A066969	54.5516	2.73887	0.735317	3.72474	0.000195514	0.0371496	OE9A066969	ID=OE9A066969T1;Parent=OE9A066969;Name=OE9A066969T1;product=OE9A066969P1;Description=alpha carbonic anhydrase 7;Ontology_term=GO:0004089%2C GO:0006730%2C GO:0006807%2C GO:0008270
OE9A078879	46.4218	2.73196	0.673085	4.05887	4.93109e-05	0.0200836	OE9A078879	ID=OE9A078879T1;Parent=OE9A078879;Name=OE9A078879T1;product=OE9A078879P1;Description=cytochrome P450 71A6-like;Ontology_term=GO:0005506%2C GO:0016705%2C GO:0020037%2C GO:0055114
OE9A031498	45.6344	2.71015	0.695971	3.89405	9.85826e-05	0.0278337	OE9A031498	ID=OE9A031498T1;Parent=OE9A031498;Name=OE9A031498T1;product=OE9A031498P1
OE9A045359	42.0207	2.69878	0.510158	5.29009	1.22258e-07	0.000697116	OE9A045359	ID=OE9A045359T1;Parent=OE9A045359;Name=OE9A045359T1;product=OE9A045359P1;Description=chalcone synthase;Ontology_term=GO:0009813%2C GO:0016210
OE9A101798	284.91	2.69418	0.685203	3.93195	8.426e-05	0.0278337	OE9A101798	ID=OE9A101798T1;Parent=OE9A101798;Name=OE9A101798T1;product=OE9A101798P1;Description=isoeugenol synthase 1-like;Ontology_term=GO:0009813%2C GO:0047526%2C GO:0055114
OE9A110918	29.7938	2.68897	0.78972	3.40496	0.00066173	0.0767708	OE9A110918	ID=OE9A110918T1;Parent=OE9A110918;Name=OE9A110918T1;product=OE9A110918P1;Description=alpha carbonic anhydrase 7;Ontology_term=GO:0004089%2C GO:0006730%2C GO:0006807%2C GO:0008270
OE9A046683	32.1801	2.66906	0.608478	4.38645	1.15215e-05	0.00875941	OE9A046683	ID=OE9A046683T1;Parent=OE9A046683;Name=OE9A046683T1;product=OE9A046683P1;Description=serine carboxypeptidase-like 50;Ontology_term=GO:0004185%2C GO:0006508
OE9A064065	360.023	2.66454	0.701663	3.79747	0.000146182	0.0323701	OE9A064065	ID=OE9A064065T1;Parent=OE9A064065;Name=OE9A064065T1;product=OE9A064065P1;Description=FT-interacting 1;Ontology_term=GO:0005515%2C GO:0016021
OE9A043535	71.1883	2.66137	0.586766	4.53566	5.74243e-06	0.00595333	OE9A043535	ID=OE9A043535T1;Parent=OE9A043535;Name=OE9A043535T1;product=OE9A043535P1;Description=dirigent 23-like;Ontology_term=GO:0009699%2C GO:0042349%2C GO:0050790
OE9A066779	41.3888	2.65412	0.680807	3.89849	9.67963e-05	0.0278337	OE9A066779	ID=OE9A066779T1;Parent=OE9A066779;Name=OE9A066779T1;product=OE9A066779P1
OE9A109431	176.21	2.64614	0.780902	3.38856	0.000702599	0.0776781	OE9A109431	ID=OE9A109431T1;Parent=OE9A109431;Name=OE9A109431T1;product=OE9A109431P1;Description=7-deoxyloganetin glucosyltransferase-like;Ontology_term=GO:0008152%2C GO:0035251
OE9A113763	71.1491	2.64063	0.681224	3.87631	0.000106055	0.0278337	OE9A113763	ID=OE9A113763T3;Parent=OE9A113763;Name=OE9A113763T3;product=OE9A113763P1
OE9A079512	67.3966	2.60181	0.60255	4.318	1.57449e-05	0.0110915	OE9A079512	ID=OE9A079512T1;Parent=OE9A079512;Name=OE9A079512T1;product=OE9A079512P1;Description=transcriptional regulator EFH1 isoform X2;Ontology_term=GO:0005488
OE9A101134	27.1507	2.59159	0.661509	3.9177	8.93991e-05	0.0278337	OE9A101134	ID=OE9A101134T1;Parent=OE9A101134;Name=OE9A101134T1;product=OE9A101134P1
OE9A024370	1106.76	2.58691	0.780428	3.31474	0.000917298	0.0868152	OE9A024370	ID=OE9A024370T1;Parent=OE9A024370;Name=OE9A024370T1;product=OE9A024370P1;Description=high affinity nitrate transporter;Ontology_term=GO:0009705%2C GO:0015112%2C GO:0015706%2C GO:0016021%2C GO:0055085
OE9A078014	473.674	2.58568	0.731042	3.53698	0.00040473	0.0590646	OE9A078014	ID=OE9A078014T1;Parent=OE9A078014;Name=OE9A078014T1;product=OE9A078014P1;Description=glucan endo-1,3-beta-glucosidase 13-like;Ontology_term=GO:0004553%2C GO:0005975%2C GO:0030247%2C GO:0046658
OE9A101662	80.3767	2.57774	0.761814	3.38368	0.000715205	0.0776781	OE9A101662	ID=OE9A101662T1;Parent=OE9A101662;Name=OE9A101662T1;product=OE9A101662P1;Description=CUB and sushi domain-containing 3;Ontology_term=GO:0006118%2C GO:0009055
OE9A116632	72.7226	2.54149	0.613542	4.14232	3.43808e-05	0.0173946	OE9A116632	ID=OE9A116632T1;Parent=OE9A116632;Name=OE9A116632T1;product=OE9A116632P1;Description=4-coumarate-- ligase 1;Ontology_term=GO:0005524%2C GO:0009805%2C GO:0009809%2C GO:0009811%2C GO:0016207
OE9A087505	52.7791	2.53754	0.613274	4.13769	3.50821e-05	0.0173946	OE9A087505	ID=OE9A087505T1;Parent=OE9A087505;Name=OE9A087505T1;product=OE9A087505P1;Description=agamous-like MADS-box AGL81;Ontology_term=GO:0003677%2C GO:0046983
OE9A035730	147.46	2.52362	0.514771	4.90242	9.46627e-07	0.00239896	OE9A035730	ID=OE9A035730T1;Parent=OE9A035730;Name=OE9A035730T1;product=OE9A035730P1;Description=lachrymatory-factor synthase;Ontology_term=GO:0004864%2C GO:0004872%2C GO:0005634%2C GO:0005737%2C GO:0009738%2C GO:0010427%2C GO:0080163
OE9A079040	23.523	2.50247	0.7112	3.51866	0.000433735	0.0614449	OE9A079040	ID=OE9A079040T1;Parent=OE9A079040;Name=OE9A079040T1;product=OE9A079040P1
OE9A117400	362.778	2.49413	0.704647	3.53955	0.000400815	0.0589793	OE9A117400	ID=OE9A117400T1;Parent=OE9A117400;Name=OE9A117400T1;product=OE9A117400P1
OE9A031523	114.867	2.46192	0.520497	4.72993	2.24595e-06	0.00439488	OE9A031523	ID=OE9A031523T1;Parent=OE9A031523;Name=OE9A031523T1;product=OE9A031523P1;Description=lachrymatory-factor synthase;Ontology_term=GO:0004864%2C GO:0004872%2C GO:0005634%2C GO:0005737%2C GO:0009738%2C GO:0010427%2C GO:0080163
OE9A112727	69.1384	2.45134	0.752606	3.25714	0.00112543	0.0949521	OE9A112727	ID=OE9A112727T1;Parent=OE9A112727;Name=OE9A112727T1;product=OE9A112727P1;Description=crocetin glucosyltransferase, chloroplastic-like;Ontology_term=GO:0009813%2C GO:0043231%2C GO:0052696%2C GO:0080043%2C GO:0080044
OE9A112630	40.7955	2.44328	0.731765	3.33888	0.000841164	0.0837784	OE9A112630	ID=OE9A112630T1;Parent=OE9A112630;Name=OE9A112630T1;product=OE9A112630P1;Description=vinorine synthase-like;Ontology_term=GO:0016747
OE9A013899	418.763	2.43345	0.530089	4.59064	4.4188e-06	0.00559911	OE9A013899	ID=OE9A013899T1;Parent=OE9A013899;Name=OE9A013899T1;product=OE9A013899P1
OE9A116895	111.252	2.43069	0.660272	3.68135	0.000232005	0.0410199	OE9A116895	ID=OE9A116895T1;Parent=OE9A116895;Name=OE9A116895T1;product=OE9A116895P1
OE9A120831	98.4869	2.42764	0.533245	4.55258	5.29916e-06	0.00594955	OE9A120831	ID=OE9A120831T1;Parent=OE9A120831;Name=OE9A120831T1;product=OE9A120831P1
OE9A101742	37.8821	2.42205	0.745988	3.24677	0.00116723	0.0957219	OE9A101742	ID=OE9A101742T1;Parent=OE9A101742;Name=OE9A101742T1;product=OE9A101742P1;Description=non-functional pseudokinase ZED1-like;Ontology_term=GO:0004672%2C GO:0005524%2C GO:0006468
OE9A060994	129.645	2.42052	0.618118	3.91595	9.00493e-05	0.0278337	OE9A060994	ID=OE9A060994T1;Parent=OE9A060994;Name=OE9A060994T1;product=OE9A060994P1;Description=SRG1-like;Ontology_term=GO:0051213%2C GO:0055114
OE9A045273	87.843	2.4138	0.719678	3.35401	0.000796507	0.0822024	OE9A045273	ID=OE9A045273T1;Parent=OE9A045273;Name=OE9A045273T1;product=OE9A045273P1;Description=core histone H2A H2B H3 H4;Ontology_term=GO:0000786%2C GO:0003677%2C GO:0005634%2C GO:0046982
OE9A066620	46.3561	2.4125	0.61585	3.91735	8.95284e-05	0.0278337	OE9A066620	ID=OE9A066620T1;Parent=OE9A066620;Name=OE9A066620T1;product=OE9A066620P1;Description=subtilisin-like protease;Ontology_term=GO:0004252%2C GO:0005794%2C GO:0006508%2C GO:0009505%2C GO:0009506
OE9A075850	111.147	2.37369	0.611089	3.88436	0.000102601	0.0278337	OE9A075850	ID=OE9A075850T1;Parent=OE9A075850;Name=OE9A075850T1;product=OE9A075850P1;Description=plastocyanin-like domain;Ontology_term=GO:0006118%2C GO:0009055%2C GO:0031224
OE9A054352	165.011	2.35124	0.589263	3.99013	6.60382e-05	0.0242935	OE9A054352	ID=OE9A054352T1;Parent=OE9A054352;Name=OE9A054352T1;product=OE9A054352P1;Description=vegetative cell wall gp1-like;Ontology_term=GO:0005199%2C GO:0005618%2C GO:0016021%2C GO:0042546
OE9A120982	54.1555	2.34664	0.644704	3.63987	0.000272774	0.0447585	OE9A120982	ID=OE9A120982T1;Parent=OE9A120982;Name=OE9A120982T1;product=OE9A120982P1;Description=premnaspirodiene oxygenase-like;Ontology_term=GO:0004497%2C GO:0005506%2C GO:0016021%2C GO:0016705%2C GO:0020037%2C GO:0055114
OE9A073692	28.2502	2.34313	0.721459	3.24776	0.00116316	0.0957219	OE9A073692	ID=OE9A073692T1;Parent=OE9A073692;Name=OE9A073692T1;product=OE9A073692P1;Description=Serine threonine kinase;Ontology_term=GO:0000166%2C GO:0004672%2C GO:0016020%2C GO:0016310
OE9A063787	32.8234	2.32839	0.56068	4.1528	3.28426e-05	0.0173946	OE9A063787	ID=OE9A063787T1;Parent=OE9A063787;Name=OE9A063787T1;product=OE9A063787P1;Description=U-box domain-containing 45-like;Ontology_term=GO:0005515
OE9A074066	29.5205	2.3012	0.592445	3.88424	0.00010265	0.0278337	OE9A074066	ID=OE9A074066T1;Parent=OE9A074066;Name=OE9A074066T1;product=OE9A074066P1
OE9A094448	62.6834	2.29257	0.666457	3.43994	0.000581834	0.0733175	OE9A094448	ID=OE9A094448T1;Parent=OE9A094448;Name=OE9A094448T1;product=OE9A094448P1;Description=aspartic ase nepenthesin-1;Ontology_term=GO:0004190%2C GO:0006508%2C GO:0030163
OE9A055796	35.1785	2.27682	0.588147	3.87117	0.000108316	0.0278337	OE9A055796	ID=OE9A055796T1;Parent=OE9A055796;Name=OE9A055796T1;product=OE9A055796P1;Description=UDP-glycosyltransferase 76B1-like;Ontology_term=GO:0009813%2C GO:0043231%2C GO:0052696%2C GO:0080043%2C GO:0080044
OE9A078548	31.6568	2.27212	0.667786	3.40246	0.000667814	0.0767708	OE9A078548	ID=OE9A078548T1;Parent=OE9A078548;Name=OE9A078548T1;product=OE9A078548P1;Description=trichome birefringence-like 38;Ontology_term=GO:0016021
OE9A027958	21.9266	2.25968	0.699169	3.23195	0.00122949	0.0991109	OE9A027958	ID=OE9A027958T1;Parent=OE9A027958;Name=OE9A027958T1;product=OE9A027958P1
OE9A062170	133.893	2.243	0.602293	3.7241	0.000196014	0.0371496	OE9A062170	ID=OE9A062170T1;Parent=OE9A062170;Name=OE9A062170T1;product=OE9A062170P1;Description=berberine bridge enzyme-like 13;Ontology_term=GO:0016614%2C GO:0050660%2C GO:0055114
OE9A111805	51.8393	2.23361	0.548995	4.06855	4.73062e-05	0.0196175	OE9A111805	ID=OE9A111805T1;Parent=OE9A111805;Name=OE9A111805T1;product=OE9A111805P1;Description=ribulose bisphosphate carboxylase small chain clone 512-like;Ontology_term=GO:0004497%2C GO:0009573%2C GO:0009853%2C GO:0015977%2C GO:0015979%2C GO:0016984%2C GO:0046487%2C GO:0055114
OE9A082187	52.3381	2.1716	0.633652	3.42711	0.000610037	0.074805	OE9A082187	ID=OE9A082187T1;Parent=OE9A082187;Name=OE9A082187T1;product=OE9A082187P1
OE9A089396	32.3395	2.1666	0.489789	4.42355	9.70938e-06	0.00820191	OE9A089396	ID=OE9A089396T1;Parent=OE9A089396;Name=OE9A089396T1;product=OE9A089396P1;Description=RNA polymerase II elongation factor ELL3 isoform 1;Ontology_term=GO:0003746%2C GO:0005840%2C GO:0006448%2C GO:0016021
OE9A117567	89.6498	2.16659	0.582461	3.71972	0.000199443	0.0371496	OE9A117567	ID=OE9A117567T1;Parent=OE9A117567;Name=OE9A117567T1;product=OE9A117567P1;Description=diacylglycerol kinase 5-like;Ontology_term=GO:0004143%2C GO:0005524%2C GO:0007205%2C GO:0009395%2C GO:0016310%2C GO:0046486
OE9A102993	68.9196	2.1581	0.500279	4.31379	1.60478e-05	0.0110915	OE9A102993	ID=OE9A102993T4;Parent=OE9A102993;Name=OE9A102993T4;product=OE9A102993P4;Description=probable LRR receptor-like serine threonine- kinase At5g48740;Ontology_term=GO:0004674%2C GO:0005515%2C GO:0005524%2C GO:0006468%2C GO:0009069%2C GO:0016021
OE9A041514	20.8589	2.08389	0.615605	3.38512	0.000711481	0.0776781	OE9A041514	ID=OE9A041514T1;Parent=OE9A041514;Name=OE9A041514T1;product=OE9A041514P1;Description=sodium transporter HKT1-like;Ontology_term=GO:0005886%2C GO:0015081%2C GO:0016021%2C GO:0035725
OE9A071750	34.0363	2.06275	0.527797	3.90822	9.29772e-05	0.0278337	OE9A071750	ID=OE9A071750T1;Parent=OE9A071750;Name=OE9A071750T1;product=OE9A071750P1;Description=GDSL esterase lipase At4g10955-like;Ontology_term=GO:0006629%2C GO:0016787
OE9A076155	60.2356	2.02466	0.523101	3.8705	0.000108611	0.0278337	OE9A076155	ID=OE9A076155T1;Parent=OE9A076155;Name=OE9A076155T1;product=OE9A076155P1
OE9A085537	224.513	2.01169	0.529269	3.80089	0.000144178	0.0323701	OE9A085537	ID=OE9A085537T1;Parent=OE9A085537;Name=OE9A085537T1;product=OE9A085537P1;Description=metallothiol transferase;Ontology_term=GO:0016829
OE9A070029	385.126	2.00011	0.444754	4.49711	6.88842e-06	0.00683092	OE9A070029	ID=OE9A070029T1;Parent=OE9A070029;Name=OE9A070029T1;product=OE9A070029P1;Description=ribulose bisphosphate carboxylase small chain clone 512-like;Ontology_term=GO:0004497%2C GO:0009573%2C GO:0009853%2C GO:0015977%2C GO:0015979%2C GO:0016984%2C GO:0046487%2C GO:0055114
OE9A053236	18.4575	-2.12535	0.651183	-3.26382	0.00109919	0.0939903	OE9A053236	ID=OE9A053236T1;Parent=OE9A053236;Name=OE9A053236T1;product=OE9A053236P1;Description=geranylgeranyl transferase type-2 subunit alpha 1;Ontology_term=GO:0004663%2C GO:0005515%2C GO:0005968%2C GO:0018344%2C GO:0018346
OE9A121851	42.499	-3.15647	0.708866	-4.45284	8.47418e-06	0.00743381	OE9A121851	ID=OE9A121851T1;Parent=OE9A121851;Name=OE9A121851T1;product=OE9A121851P1;Description=ERBB-3 BINDING PROTEIN 1-like;Ontology_term=GO:0004177%2C GO:0006508

## Sheet: ShinyGO UP FC >2 
	Enrichment FDR	nGenes	Pathway Genes	Fold Enrichment	Pathways (click for details)	Genes
	0.0014	5	168	17.8	GO:0009813 Flavonoid biosynthetic process	OE9A045359 OE9A048201 OE9A055796 OE9A101798 OE9A112727
	0.0059	2	13	92.2	GO:0009853 Photorespiration	OE9A070029 OE9A111805
	0.0059	2	10	119.9	GO:0016984 Ribulose-bisphosphate carboxylase activity	OE9A070029 OE9A111805
	0.0059	14	2739	3.1	GO:0055114 Oxidation-reduction process	OE9A004056 OE9A004824 OE9A030206 OE9A033397 OE9A060994 OE9A062170 OE9A070029 OE9A077701 OE9A078879 OE9A101798 OE9A111805 OE9A112556 OE9A119079 OE9A120982
	0.0059	5	291	10.3	GO:0004497 Monooxygenase activity	OE9A004056 OE9A030206 OE9A070029 OE9A111805 OE9A120982
	0.0075	2	16	74.9	GO:0015977 Carbon fixation	OE9A070029 OE9A111805
	0.01	2	20	59.9	GO:0004089 Carbonate dehydratase activity	OE9A066969 OE9A110918
	0.011	2	22	54.5	GO:0009573 Chloroplast ribulose bisphosphate carboxylase complex	OE9A070029 OE9A111805
	0.018	2	33	36.3	GO:0010427 Abscisic acid binding	OE9A031523 OE9A035730
	0.018	2	36	33.3	GO:0042349 Guiding stereospecific synthesis activity	OE9A043535 OE9A047382
	0.018	3	139	12.9	GO:0052696 Flavonoid glucuronidation	OE9A048201 OE9A055796 OE9A112727
	0.018	2	34	35.3	GO:0004864 Protein phosphatase inhibitor activity	OE9A031523 OE9A035730
	0.018	2	33	36.3	GO:0004872 Receptor activity	OE9A031523 OE9A035730
	0.021	2	41	29.2	GO:0009699 Phenylpropanoid biosynthetic process	OE9A043535 OE9A047382
	0.03	2	51	23.5	GO:0006730 One-carbon metabolic process	OE9A066969 OE9A110918
	0.03	2	52	23	GO:0006807 Nitrogen compound metabolic process	OE9A066969 OE9A110918
	0.03	1	6	99.9	GO:0006598 Polyamine catabolic process	OE9A112556
	0.03	1	5	119.9	GO:0008202 Steroid metabolic process	OE9A033397
	0.03	1	6	99.9	GO:0010283 Pinoresinol reductase activity	OE9A077701
	0.03	1	6	99.9	GO:0010284 Lariciresinol reductase activity	OE9A077701
