# Supplementary material for: Comparative transcriptomics of biopesticide-treated olives subjected to Xylella infection
Source: Research Square preprint supplement (doi:10.21203/rs.3.rs-8603179/v1), 2026-01-29
Supplement: Supplementary file 6 [file 2f99355ea82b1479dab4c173.xlsx]

## Sheet: UP FC >2 
List of Differential Expressed Genes (DEGs) FC >2 in _T6_MockSankari©
Gene ID	baseMean	log2FoldChange	lfcSE	stat	pvalue	padj	id gene	Description
OE9A094670	7.61233	6.13994	1.92888	3.18316	0.00145676	0.0486095	OE9A094670	ID=OE9A094670T1;Parent=OE9A094670;Name=OE9A094670T1;product=OE9A094670P1
OE9A067377	103.496	6.11165	1.97559	3.09358	0.00197758	0.0618643	OE9A067377	ID=OE9A067377T1;Parent=OE9A067377;Name=OE9A067377T1;product=OE9A067377P1
OE9A010126	4.89211	5.86028	1.50487	3.8942	9.85228e-05	0.00488328	OE9A010126	ID=OE9A010126T1;Parent=OE9A010126;Name=OE9A010126T1;product=OE9A010126P1;Description=NRT1 PTR FAMILY -like;Ontology_term=GO:0005215%2C GO:0006857%2C GO:0016021
OE9A006819	5.11378	5.18782	1.7598	2.94795	0.00319886	0.0886275	OE9A006819	ID=OE9A006819T1;Parent=OE9A006819;Name=OE9A006819T1;product=OE9A006819P1;Description=deoxyhypusine synthase;Ontology_term=GO:0008612
OE9A023273	12.0435	4.93547	1.58996	3.10414	0.00190831	0.0603152	OE9A023273	ID=OE9A023273T1;Parent=OE9A023273;Name=OE9A023273T1;product=OE9A023273P1;Description=lon protease homolog 2, peroxisomal-like isoform X1;Ontology_term=GO:0004176%2C GO:0004252%2C GO:0005524%2C GO:0005782%2C GO:0006510%2C GO:0006515%2C GO:0016485%2C GO:0016558
OE9A085662	4.52183	4.87402	1.51706	3.2128	0.00131447	0.0443463	OE9A085662	ID=OE9A085662T1;Parent=OE9A085662;Name=OE9A085662T1;product=OE9A085662P1;Description=Zinc finger, FYVE-type;Ontology_term=GO:0032587%2C GO:0035091%2C GO:0046872%2C GO:1900027
OE9A013648	3.92585	4.70711	1.59423	2.95259	0.00315115	0.0875441	OE9A013648	ID=OE9A013648T1;Parent=OE9A013648;Name=OE9A013648T1;product=OE9A013648P1;Description=hydroxyproline O-arabinosyltransferase 3;Ontology_term=GO:0005768%2C GO:0005802%2C GO:0008152%2C GO:0016021%2C GO:1990585
OE9A075360	7.88033	4.54018	1.43403	3.16602	0.0015454	0.0505726	OE9A075360	ID=OE9A075360T1;Parent=OE9A075360;Name=OE9A075360T1;product=OE9A075360P1
OE9A001125	7.06121	3.97229	1.34524	2.95284	0.00314863	0.0875441	OE9A001125	ID=OE9A001125T1;Parent=OE9A001125;Name=OE9A001125T1;product=OE9A001125P1;Description=cannabidiolic acid synthase-like;Ontology_term=GO:0016614%2C GO:0050660%2C GO:0055114
OE9A068813	6.9613	3.78506	1.17017	3.23462	0.00121803	0.041367	OE9A068813	ID=OE9A068813T1;Parent=OE9A068813;Name=OE9A068813T1;product=OE9A068813P1
OE9A068044	5.84949	3.78107	1.27578	2.96373	0.00303931	0.0854229	OE9A068044	ID=OE9A068044T1;Parent=OE9A068044;Name=OE9A068044T1;product=OE9A068044P1;Description=DEAD-box ATP-dependent RNA helicase 37-like;Ontology_term=GO:0003676%2C GO:0004004%2C GO:0005524%2C GO:0010501
OE9A001462	8.29583	3.75055	1.09428	3.42741	0.000609374	0.0235511	OE9A001462	ID=OE9A001462T1;Parent=OE9A001462;Name=OE9A001462T1;product=OE9A001462P1
OE9A027984	7.55494	3.65858	1.02671	3.56339	0.000366103	0.0152411	OE9A027984	ID=OE9A027984T1;Parent=OE9A027984;Name=OE9A027984T1;product=OE9A027984P1;Description=protease Do-like 7;Ontology_term=GO:0004252%2C GO:0005515%2C GO:0006508
OE9A023728	7.79222	3.61712	1.0212	3.54202	0.000397073	0.0163609	OE9A023728	ID=OE9A023728T1;Parent=OE9A023728;Name=OE9A023728T1;product=OE9A023728P1;Description=ATP-dependent zinc metalloprotease FTSH 10, mitochondrial-like;Ontology_term=GO:0004176%2C GO:0004222%2C GO:0005524%2C GO:0005743%2C GO:0006461%2C GO:0006510%2C GO:0008053%2C GO:0008270%2C GO:0009535%2C GO:0016021%2C GO:0034982%2C GO:0042407%2C GO:0045041%2C GO:0051301
OE9A059693	8.70401	3.60995	1.04888	3.44171	0.00057806	0.0226855	OE9A059693	ID=OE9A059693T1;Parent=OE9A059693;Name=OE9A059693T1;product=OE9A059693P1;Description=outer envelope pore 16-2, chloroplastic;Ontology_term=GO:0005744%2C GO:0015266%2C GO:0030150%2C GO:0031305
OE9A099656	15.1809	3.46425	1.17285	2.9537	0.00313985	0.0874689	OE9A099656	ID=OE9A099656T2;Parent=OE9A099656;Name=OE9A099656T2;product=OE9A099656P2;Description=MADS-box JOINTLESS;Ontology_term=GO:0003677%2C GO:0003700%2C GO:0005634%2C GO:0005667%2C GO:0006355%2C GO:0045449%2C GO:0046983
OE9A058915	8.71408	3.2094	1.10157	2.91346	0.00357443	0.0966648	OE9A058915	ID=OE9A058915T1;Parent=OE9A058915;Name=OE9A058915T1;product=OE9A058915P1;Description=NIM1-INTERACTING 2;Ontology_term=GO:0010112
OE9A044758	7.23438	3.17637	0.964204	3.29429	0.000986712	0.0349088	OE9A044758	ID=OE9A044758T1;Parent=OE9A044758;Name=OE9A044758T1;product=OE9A044758P1
OE9A013311	16.5235	2.90957	0.960094	3.03051	0.00244144	0.0727239	OE9A013311	ID=OE9A013311T1;Parent=OE9A013311;Name=OE9A013311T1;product=OE9A013311P1;Description=probable 9-cis-epoxycarotenoid dioxygenase NCED5, chloroplastic;Ontology_term=GO:0016702%2C GO:0055114
OE9A077600	6.89687	2.84488	0.908748	3.13055	0.00174478	0.0559576	OE9A077600	ID=OE9A077600T1;Parent=OE9A077600;Name=OE9A077600T1;product=OE9A077600P1
OE9A098229	10.5763	2.81596	0.909574	3.09591	0.0019621	0.0615694	OE9A098229	ID=OE9A098229T1;Parent=OE9A098229;Name=OE9A098229T1;product=OE9A098229P1;Description=late embryogenesis abundant -like;Ontology_term=GO:0006950%2C GO:0009415
OE9A000683	23.9638	2.65546	0.768627	3.45482	0.000550667	0.0217756	OE9A000683	ID=OE9A000683T1;Parent=OE9A000683;Name=OE9A000683T1;product=OE9A000683P1;Description=nuclear valosin-containing -like;Ontology_term=GO:0005524%2C GO:0005634%2C GO:0008568%2C GO:0031122
OE9A048916	45.9529	2.62878	0.439039	5.98757	2.13006e-09	2.58075e-07	OE9A048916	ID=OE9A048916T1;Parent=OE9A048916;Name=OE9A048916T1;product=OE9A048916P1
OE9A038226	9.95838	2.55367	0.742195	3.4407	0.000580202	0.0227194	OE9A038226	ID=OE9A038226T1;Parent=OE9A038226;Name=OE9A038226T1;product=OE9A038226P1
OE9A057790	12.2965	2.52207	0.820592	3.07348	0.00211578	0.0652516	OE9A057790	ID=OE9A057790T1;Parent=OE9A057790;Name=OE9A057790T1;product=OE9A057790P1;Description=ATP-dependent zinc metalloprotease FTSH 7, chloroplastic;Ontology_term=GO:0004176%2C GO:0004222%2C GO:0005524%2C GO:0005739%2C GO:0006508%2C GO:0006510%2C GO:0008270%2C GO:0009941%2C GO:0016021
OE9A088576	49.5748	2.52186	0.827671	3.04693	0.00231188	0.0695432	OE9A088576	ID=OE9A088576T1;Parent=OE9A088576;Name=OE9A088576T1;product=OE9A088576P1
OE9A097663	7.10472	2.49663	0.854341	2.92229	0.00347473	0.0944705	OE9A097663	ID=OE9A097663T4;Parent=OE9A097663;Name=OE9A097663T4;product=OE9A097663P2;Description=acyl-activating enzyme 19 isoform X1;Ontology_term=GO:0003824%2C GO:0008152
OE9A116990	14.0291	2.47253	0.769702	3.21232	0.00131666	0.0443712	OE9A116990	ID=OE9A116990T1;Parent=OE9A116990;Name=OE9A116990T1;product=OE9A116990P1;Description=pentatricopeptide repeat-containing At3g29230-like;Ontology_term=GO:0005515
OE9A028455	10.5559	2.38223	0.800801	2.97481	0.00293169	0.083343	OE9A028455	ID=OE9A028455T1;Parent=OE9A028455;Name=OE9A028455T1;product=OE9A028455P1;Description=HBS1 isoform X1;Ontology_term=GO:0003924%2C GO:0005525%2C GO:0008270
OE9A087660	14.1225	2.35777	0.787901	2.99247	0.00276729	0.0798592	OE9A087660	ID=OE9A087660T1;Parent=OE9A087660;Name=OE9A087660T1;product=OE9A087660P1
OE9A105663	24.7345	2.25146	0.621759	3.62111	0.00029334	0.012722	OE9A105663	ID=OE9A105663T1;Parent=OE9A105663;Name=OE9A105663T1;product=OE9A105663P1
OE9A072093	11.6365	2.21545	0.717375	3.08827	0.00201327	0.0628518	OE9A072093	ID=OE9A072093T1;Parent=OE9A072093;Name=OE9A072093T1;product=OE9A072093P1;Description=ubiquitin-conjugating enzyme E2 28;Ontology_term=GO:0004842%2C GO:0005524%2C GO:0005737%2C GO:0006511%2C GO:0016567%2C GO:0031625
OE9A112344	25.0558	2.17689	0.654086	3.32814	0.000874292	0.0316308	OE9A112344	ID=OE9A112344T1;Parent=OE9A112344;Name=OE9A112344T1;product=OE9A112344P1;Description=asparagine synthetase domain-containing 1 isoform X1;Ontology_term=GO:0005488
OE9A095774	18.6036	2.16874	0.682349	3.17834	0.00148119	0.0489637	OE9A095774	ID=OE9A095774T1;Parent=OE9A095774;Name=OE9A095774T1;product=OE9A095774P1;Description=wall-associated receptor kinase 5-like;Ontology_term=GO:0004674%2C GO:0005509%2C GO:0005524%2C GO:0006468%2C GO:0009069%2C GO:0016021%2C GO:0030247
OE9A083241	27.5912	2.14381	0.506726	4.23071	2.32956e-05	0.00130987	OE9A083241	ID=OE9A083241T1;Parent=OE9A083241;Name=OE9A083241T1;product=OE9A083241P1;Description=LUTEIN DEFICIENT 5, chloroplastic;Ontology_term=GO:0005506%2C GO:0020037%2C GO:0055114%2C GO:0070330
OE9A110789	15.2459	2.13878	0.680191	3.14438	0.00166441	0.0536846	OE9A110789	ID=OE9A110789T2;Parent=OE9A110789;Name=OE9A110789T2;product=OE9A110789P2;Description=PI-PLC X domain-containing At5g67130;Ontology_term=GO:0006629%2C GO:0008081
OE9A027217	135.419	2.13458	0.313279	6.81366	9.51458e-12	1.73952e-09	OE9A027217	ID=OE9A027217T1;Parent=OE9A027217;Name=OE9A027217T1;product=OE9A027217P1
OE9A031473	20.8172	2.12695	0.531137	4.00451	6.21453e-05	0.0032269	OE9A031473	ID=OE9A031473T1;Parent=OE9A031473;Name=OE9A031473T1;product=OE9A031473P1
OE9A113638	10.9331	2.12351	0.68361	3.10632	0.0018943	0.0600591	OE9A113638	ID=OE9A113638T1;Parent=OE9A113638;Name=OE9A113638T1;product=OE9A113638P1;Description=cullin-1-like;Ontology_term=GO:0006511%2C GO:0031461%2C GO:0031625
OE9A026938	39.7003	2.08829	0.660425	3.16203	0.00156671	0.051051	OE9A026938	ID=OE9A026938T1;Parent=OE9A026938;Name=OE9A026938T1;product=OE9A026938P1;Description=receptor-like kinase TMK3;Ontology_term=GO:0004672%2C GO:0005524%2C GO:0006468%2C GO:0016020

## Sheet: ShinyGO FC >2
	Enrichment FDR	nGenes	Pathway Genes	Fold Enrichment	Pathways (click for details)	Genes
	0.00034	3	43	97.2	GO:0004176 ATP-dependent peptidase activity	OE9A023273 OE9A023728 OE9A057790
	0.047	1	16	87.1	GO:0005782 Peroxisomal matrix	OE9A023273
	0.047	1	14	99.5	GO:0006461 Protein complex assembly	OE9A023728
	0.047	1	16	87.1	GO:0006515 Misfolded or incompletely synthesized protein catabolic process	OE9A023273
	0.047	1	7	199	GO:0008053 Mitochondrial fusion	OE9A023728
	0.047	1	9	154.8	GO:0008612 Peptidyl-lysine modification to peptidyl-hypusine	OE9A006819
	0.047	1	6	232.2	GO:0009266 Response to temperature stimulus	OE9A099656
	0.047	1	11	126.7	GO:0009415 Response to water	OE9A098229
	0.047	2	93	30	GO:0031625 Ubiquitin protein ligase binding	OE9A072093 OE9A113638
	0.047	1	4	348.3	GO:0032587 Ruffle membrane	OE9A085662
	0.047	1	5	278.7	GO:0034038 Deoxyhypusine synthase activity	OE9A006819
	0.047	1	14	99.5	GO:0034982 Mitochondrial protein processing	OE9A023728
	0.047	1	8	174.2	GO:0042407 Cristae formation	OE9A023728
	0.047	1	14	99.5	GO:0045041 Protein import into mitochondrial intermembrane space	OE9A023728
	0.047	1	16	87.1	GO:0048438 Floral whorl development	OE9A099656
	0.047	1	6	232.2	GO:0070330 Aromatase activity	OE9A083241
	0.047	1	8	174.2	GO:1900027 Reg. of ruffle assembly	OE9A085662
	0.047	2	102	27.3	GO:0004222 Metalloendopeptidase activity	OE9A023728 OE9A057790
	0.047	2	195	14.3	GO:0004252 Serine-type endopeptidase activity	OE9A023273 OE9A027984
	0.047	8	4103	2.7	GO:0005524 ATP binding	OE9A000683 OE9A023273 OE9A023728 OE9A026938 OE9A057790 OE9A068044 OE9A072093 OE9A095774

## Sheet: DOWN FC <-2
List of Differential Expressed Genes (DEGs) FC <-2 in T6_MockSankari©
Gene ID	baseMean	log2FoldChange	lfcSE	stat	pvalue	padj	id gene	Description
OE9A022901	75.7784	-7.73857	2.61007	-2.96489	0.0030279	0.0852054	OE9A022901	ID=OE9A022901T1;Parent=OE9A022901;Name=OE9A022901T1;product=OE9A022901P1
OE9A042006	27.1869	-7.61517	1.39072	-5.47569	4.35803e-08	4.26963e-06	OE9A042006	ID=OE9A042006T1;Parent=OE9A042006;Name=OE9A042006T1;product=OE9A042006P1;Description=probable WRKY transcription factor 53;Ontology_term=GO:0003700%2C GO:0005667%2C GO:0006355%2C GO:0043565%2C GO:0045449
OE9A019272	12.0421	-7.16771	1.37943	-5.19615	2.03458e-07	1.74567e-05	OE9A019272	ID=OE9A019272T1;Parent=OE9A019272;Name=OE9A019272T1;product=OE9A019272P1;Description=Defense-related containing SCP domain;Ontology_term=GO:0005576
OE9A002944	57.3657	-6.95322	2.33437	-2.97862	0.00289545	0.0824664	OE9A002944	ID=OE9A002944T1;Parent=OE9A002944;Name=OE9A002944T1;product=OE9A002944P1
OE9A100850	11.2101	-6.90715	1.81653	-3.80239	0.000143304	0.0067004	OE9A100850	ID=OE9A100850T1;Parent=OE9A100850;Name=OE9A100850T1;product=OE9A100850P1
OE9A019254	691.353	-6.60885	0.540507	-12.2271	2.22709e-34	1.69993e-30	OE9A019254	ID=OE9A019254T1;Parent=OE9A019254;Name=OE9A019254T1;product=OE9A019254P1;Description=BON1-associated 2-like;Ontology_term=GO:0005515
OE9A021387	29.6671	-6.36448	2.05369	-3.09905	0.00194141	0.0611715	OE9A021387	ID=OE9A021387T1;Parent=OE9A021387;Name=OE9A021387T1;product=OE9A021387P1;Description=hexose carrier HEX6-like;Ontology_term=GO:0016021%2C GO:0022891%2C GO:0055085
OE9A018887	9.91997	-6.33722	1.48796	-4.259	2.05344e-05	0.00117188	OE9A018887	ID=OE9A018887T1;Parent=OE9A018887;Name=OE9A018887T1;product=OE9A018887P1
OE9A101474	15.4156	-6.28021	1.39099	-4.51493	6.33378e-06	0.000403722	OE9A101474	ID=OE9A101474T1;Parent=OE9A101474;Name=OE9A101474T1;product=OE9A101474P1;Description=ubiquinol oxidase 2, mitochondrial-like isoform X2;Ontology_term=GO:0006118%2C GO:0009916%2C GO:0016021%2C GO:0046872%2C GO:0055114%2C GO:0070469
OE9A045351	9.31648	-6.27567	1.93546	-3.24248	0.00118496	0.0404238	OE9A045351	ID=OE9A045351T1;Parent=OE9A045351;Name=OE9A045351T1;product=OE9A045351P1;Description=gibberellin 2-beta-dioxygenase 2;Ontology_term=GO:0005506%2C GO:0009416%2C GO:0045487%2C GO:0052634%2C GO:0055114
OE9A010940	12.6465	-6.14737	1.62592	-3.78085	0.000156291	0.00725211	OE9A010940	ID=OE9A010940T1;Parent=OE9A010940;Name=OE9A010940T1;product=OE9A010940P1;Description=tetratricopeptide repeat 1-like;Ontology_term=GO:0005515%2C GO:0016020
OE9A046853	32.4767	-6.11635	1.3802	-4.43151	9.3577e-06	0.000578772	OE9A046853	ID=OE9A046853T1;Parent=OE9A046853;Name=OE9A046853T1;product=OE9A046853P1;Description=butyrate-- ligase AAE11, peroxisomal-like;Ontology_term=GO:0008152%2C GO:0016874
OE9A024278	19.5736	-6.08206	1.39445	-4.36161	1.29107e-05	0.000766075	OE9A024278	ID=OE9A024278T1;Parent=OE9A024278;Name=OE9A024278T1;product=OE9A024278P1;Description=calcium-binding CML38;Ontology_term=GO:0005509
OE9A114203	15.6251	-6.01201	2.06995	-2.90442	0.00367933	0.0988014	OE9A114203	ID=OE9A114203T1;Parent=OE9A114203;Name=OE9A114203T1;product=OE9A114203P1;Description=polyphenol oxidase I, chloroplastic-like;Ontology_term=GO:0004097%2C GO:0006118%2C GO:0006570%2C GO:0046148%2C GO:0046872%2C GO:0055114
OE9A105450	4.4099	-5.97623	1.72134	-3.47185	0.000516882	0.0205755	OE9A105450	ID=OE9A105450T1;Parent=OE9A105450;Name=OE9A105450T1;product=OE9A105450P1;Description=probable WRKY transcription factor 53;Ontology_term=GO:0003700%2C GO:0005667%2C GO:0006355%2C GO:0043565%2C GO:0045449
OE9A099586	9.76608	-5.96885	1.48946	-4.00739	6.13927e-05	0.00320417	OE9A099586	ID=OE9A099586T1;Parent=OE9A099586;Name=OE9A099586T1;product=OE9A099586P1;Description=probable E3 ubiquitin- ligase LUL4;Ontology_term=GO:0005515%2C GO:0008270
OE9A115944	4.30185	-5.94714	1.79466	-3.3138	0.000920376	0.0329436	OE9A115944	ID=OE9A115944T1;Parent=OE9A115944;Name=OE9A115944T1;product=OE9A115944P1;Description=late embryogenesis abundant At1g64065-like;Ontology_term=GO:0016020
OE9A007517	34.0639	-5.83586	1.10772	-5.26834	1.37661e-07	1.22539e-05	OE9A007517	ID=OE9A007517T1;Parent=OE9A007517;Name=OE9A007517T1;product=OE9A007517P1
OE9A045533	8.69569	-5.82505	1.51483	-3.84535	0.000120379	0.00579341	OE9A045533	ID=OE9A045533T1;Parent=OE9A045533;Name=OE9A045533T1;product=OE9A045533P1;Description=SAL1 phosphatase-like;Ontology_term=GO:0006790%2C GO:0008441%2C GO:0016311%2C GO:0046854
OE9A008555	5.9987	-5.73211	1.91892	-2.98716	0.00281582	0.080757	OE9A008555	ID=OE9A008555T1;Parent=OE9A008555;Name=OE9A008555T1;product=OE9A008555P1;Description=U-box domain-containing 21-like;Ontology_term=GO:0004842%2C GO:0005488%2C GO:0016567
OE9A012128	11.7251	-5.71048	1.66685	-3.42591	0.000612733	0.0236444	OE9A012128	ID=OE9A012128T1;Parent=OE9A012128;Name=OE9A012128T1;product=OE9A012128P1;Description=ethylene-responsive transcription factor ERF027-like;Ontology_term=GO:0003700%2C GO:0005634%2C GO:0005667%2C GO:0006355%2C GO:0019760%2C GO:0043565%2C GO:0044212%2C GO:0045449%2C GO:0050832
OE9A008141	148.034	-5.60805	0.897848	-6.2461	4.20824e-10	5.89385e-08	OE9A008141	ID=OE9A008141T1;Parent=OE9A008141;Name=OE9A008141T1;product=OE9A008141P1;Description=xyloglucan endotransglucosylase hydrolase 2-like;Ontology_term=GO:0004553%2C GO:0005618%2C GO:0010411%2C GO:0016762%2C GO:0042546%2C GO:0048046
OE9A002800	15.4562	-5.59802	1.48346	-3.77362	0.000160896	0.00744317	OE9A002800	ID=OE9A002800T1;Parent=OE9A002800;Name=OE9A002800T1;product=OE9A002800P1;Description=LYK5;Ontology_term=GO:0004672%2C GO:0005524%2C GO:0006468%2C GO:0016020
OE9A102076	6.67811	-5.5879	1.8826	-2.96818	0.00299573	0.0846905	OE9A102076	ID=OE9A102076T1;Parent=OE9A102076;Name=OE9A102076T1;product=OE9A102076P1;Description=exocyst complex component EXO70H1-like;Ontology_term=GO:0000145%2C GO:0006887
OE9A057817	10.746	-5.56399	1.39742	-3.98161	6.84507e-05	0.0035125	OE9A057817	ID=OE9A057817T1;Parent=OE9A057817;Name=OE9A057817T1;product=OE9A057817P1;Description=transcription factor bHLH35 isoform X2;Ontology_term=GO:0016020%2C GO:0032440%2C GO:0046983%2C GO:0055114
OE9A106469	4.92301	-5.51688	1.52555	-3.61633	0.000298808	0.0129224	OE9A106469	ID=OE9A106469T1;Parent=OE9A106469;Name=OE9A106469T1;product=OE9A106469P1
OE9A100291	1350.99	-5.49969	0.620603	-8.86184	7.87034e-19	4.21574e-16	OE9A100291	ID=OE9A100291T1;Parent=OE9A100291;Name=OE9A100291T1;product=OE9A100291P1;Description=xyloglucan endotransglycosylase hydrolase;Ontology_term=GO:0004553%2C GO:0005618%2C GO:0010411%2C GO:0016762%2C GO:0042546%2C GO:0048046%2C GO:0071555
OE9A041554	16.9945	-5.49497	1.49955	-3.66441	0.000247905	0.0109696	OE9A041554	ID=OE9A041554T1;Parent=OE9A041554;Name=OE9A041554T1;product=OE9A041554P1;Description=myb-related Myb4-like;Ontology_term=GO:0003677
OE9A120892	4.36103	-5.4924	1.55866	-3.5238	0.000425403	0.0174107	OE9A120892	ID=OE9A120892T1;Parent=OE9A120892;Name=OE9A120892T1;product=OE9A120892P1
OE9A090863	3121.95	-5.46893	0.468536	-11.6724	1.76454e-31	5.38749e-28	OE9A090863	ID=OE9A090863T1;Parent=OE9A090863;Name=OE9A090863T1;product=OE9A090863P1;Description=xyloglucan endotransglycosylase hydrolase;Ontology_term=GO:0004553%2C GO:0005618%2C GO:0010411%2C GO:0016762%2C GO:0042546%2C GO:0048046%2C GO:0071555
OE9A041022	941.488	-5.40404	0.503095	-10.7416	6.49076e-27	9.00799e-24	OE9A041022	ID=OE9A041022T1;Parent=OE9A041022;Name=OE9A041022T1;product=OE9A041022P1;Description=xyloglucan endotransglycosylase hydrolase;Ontology_term=GO:0004553%2C GO:0005618%2C GO:0010411%2C GO:0016762%2C GO:0042546%2C GO:0048046%2C GO:0071555
OE9A056195	5.64305	-5.38715	1.56576	-3.44061	0.000580412	0.0227194	OE9A056195	ID=OE9A056195T1;Parent=OE9A056195;Name=OE9A056195T1;product=OE9A056195P1;Description=clathrin assembly At1g25240;Ontology_term=GO:0005545%2C GO:0016491%2C GO:0030136%2C GO:0030276%2C GO:0048268
OE9A118985	10.9186	-5.34796	1.46906	-3.64041	0.000272209	0.011907	OE9A118985	ID=OE9A118985T1;Parent=OE9A118985;Name=OE9A118985T1;product=OE9A118985P1
OE9A073696	14.1412	-5.22628	1.53601	-3.40249	0.000667738	0.0252945	OE9A073696	ID=OE9A073696T1;Parent=OE9A073696;Name=OE9A073696T1;product=OE9A073696P1
OE9A103007	37.2317	-5.20201	0.905357	-5.74582	9.14789e-09	1.03064e-06	OE9A103007	ID=OE9A103007T1;Parent=OE9A103007;Name=OE9A103007T1;product=OE9A103007P1;Description=probable inactive poly [ADP-ribose] polymerase SRO5;Ontology_term=GO:0003950
OE9A032361	993.227	-5.19272	0.584553	-8.88323	6.49456e-19	3.60531e-16	OE9A032361	ID=OE9A032361T1;Parent=OE9A032361;Name=OE9A032361T1;product=OE9A032361P1;Description=probable xyloglucan endotransglucosylase hydrolase 23;Ontology_term=GO:0004553%2C GO:0005618%2C GO:0010411%2C GO:0016762%2C GO:0042546%2C GO:0048046%2C GO:0071555
OE9A027095	536.31	-5.12315	0.427835	-11.9746	4.82864e-33	2.10611e-29	OE9A027095	ID=OE9A027095T1;Parent=OE9A027095;Name=OE9A027095T1;product=OE9A027095P1;Description=calcium-binding CML38-like;Ontology_term=GO:0005509
OE9A030746	10.7604	-5.09163	1.33154	-3.82386	0.000131376	0.00625768	OE9A030746	ID=OE9A030746T1;Parent=OE9A030746;Name=OE9A030746T1;product=OE9A030746P1;Description=probably inactive leucine-rich repeat receptor kinase At5g48380;Ontology_term=GO:0004672%2C GO:0005524%2C GO:0006468%2C GO:0016021
OE9A088020	6.87583	-5.06383	1.50593	-3.36259	0.000772162	0.028587	OE9A088020	ID=OE9A088020T1;Parent=OE9A088020;Name=OE9A088020T1;product=OE9A088020P1;Description=MLO 6;Ontology_term=GO:0005516%2C GO:0006952%2C GO:0009607%2C GO:0016021
OE9A020056	12.5086	-5.05768	1.59859	-3.16384	0.00155705	0.0508447	OE9A020056	ID=OE9A020056T1;Parent=OE9A020056;Name=OE9A020056T1;product=OE9A020056P1;Description=uncharacterized protein At4g15970-like;Ontology_term=GO:0005794%2C GO:0016020%2C GO:0016740
OE9A073614	5.28245	-5.05685	1.60716	-3.14646	0.00165262	0.0533944	OE9A073614	ID=OE9A073614T1;Parent=OE9A073614;Name=OE9A073614T1;product=OE9A073614P1;Description=peroxidase N1-like;Ontology_term=GO:0004601%2C GO:0005576%2C GO:0006804%2C GO:0006979%2C GO:0020037%2C GO:0042744%2C GO:0046872%2C GO:0055114%2C GO:0098869
OE9A070362	4.23002	-5.05573	1.55472	-3.25186	0.00114652	0.0394206	OE9A070362	ID=OE9A070362T1;Parent=OE9A070362;Name=OE9A070362T1;product=OE9A070362P1;Description=ethylene-responsive transcription factor ERF017-like;Ontology_term=GO:0003677%2C GO:0003700%2C GO:0005634%2C GO:0005667%2C GO:0006355%2C GO:0045449
OE9A080959	7.6298	-4.98074	1.70507	-2.92114	0.00348756	0.0947351	OE9A080959	ID=OE9A080959T1;Parent=OE9A080959;Name=OE9A080959T1;product=OE9A080959P1;Description=ethylene-responsive transcription factor ERF027-like;Ontology_term=GO:0003700%2C GO:0005634%2C GO:0005667%2C GO:0006355%2C GO:0019760%2C GO:0043565%2C GO:0044212%2C GO:0045449%2C GO:0050832
OE9A008626	64.1526	-4.9684	0.826551	-6.01101	1.84377e-09	2.2791e-07	OE9A008626	ID=OE9A008626T1;Parent=OE9A008626;Name=OE9A008626T1;product=OE9A008626P1;Description=elicitor-responsive 1-like;Ontology_term=GO:0005515
OE9A102863	9.1176	-4.95522	1.30496	-3.7972	0.000146337	0.00683176	OE9A102863	ID=OE9A102863T1;Parent=OE9A102863;Name=OE9A102863T1;product=OE9A102863P1
OE9A061230	4.84347	-4.92743	1.57782	-3.12294	0.00179052	0.0572443	OE9A061230	ID=OE9A061230T1;Parent=OE9A061230;Name=OE9A061230T1;product=OE9A061230P1
OE9A075608	24.8238	-4.92626	1.44293	-3.41406	0.000640024	0.0244265	OE9A075608	ID=OE9A075608T1;Parent=OE9A075608;Name=OE9A075608T1;product=OE9A075608P1;Description=xyloglucan endotransglucosylase hydrolase 2-like;Ontology_term=GO:0004553%2C GO:0005618%2C GO:0006073%2C GO:0016762%2C GO:0048046
OE9A031175	30.8976	-4.91104	1.04357	-4.70602	2.52598e-06	0.000177295	OE9A031175	ID=OE9A031175T1;Parent=OE9A031175;Name=OE9A031175T1;product=OE9A031175P1;Description=probable WRKY transcription factor 31;Ontology_term=GO:0003700%2C GO:0005667%2C GO:0006355%2C GO:0043565%2C GO:0045449
OE9A095641	15.3022	-4.87288	1.42395	-3.42209	0.000621427	0.0238395	OE9A095641	ID=OE9A095641T1;Parent=OE9A095641;Name=OE9A095641T1;product=OE9A095641P1
OE9A070139	3.99643	-4.85673	1.64662	-2.94952	0.00318269	0.0882598	OE9A070139	ID=OE9A070139T1;Parent=OE9A070139;Name=OE9A070139T1;product=OE9A070139P1;Description=GDSL esterase lipase At5g33370-like;Ontology_term=GO:0016788
OE9A102668	218.486	-4.83624	0.644901	-7.4992	6.42085e-14	1.58731e-11	OE9A102668	ID=OE9A102668T1;Parent=OE9A102668;Name=OE9A102668T1;product=OE9A102668P1;Description=DMR6-LIKE OXYGENASE 1;Ontology_term=GO:0005506%2C GO:0051213%2C GO:0055114
OE9A048283	19.1097	-4.80673	1.00155	-4.79927	1.59247e-06	0.000114944	OE9A048283	ID=OE9A048283T1;Parent=OE9A048283;Name=OE9A048283T1;product=OE9A048283P1;Description=L-ascorbate oxidase homolog;Ontology_term=GO:0005507%2C GO:0009505%2C GO:0009506%2C GO:0016722%2C GO:0055114
OE9A092389	326.253	-4.79987	0.49258	-9.74435	1.95031e-22	1.681e-19	OE9A092389	ID=OE9A092389T1;Parent=OE9A092389;Name=OE9A092389T1;product=OE9A092389P1;Description=NAC domain-containing 90;Ontology_term=GO:0003677%2C GO:0005634%2C GO:0006355
OE9A095034	2494.54	-4.79362	0.452291	-10.5985	3.02739e-26	3.85135e-23	OE9A095034	ID=OE9A095034T1;Parent=OE9A095034;Name=OE9A095034T1;product=OE9A095034P1
OE9A098499	2594.93	-4.78217	0.442275	-10.8127	2.99837e-27	4.81823e-24	OE9A098499	ID=OE9A098499T1;Parent=OE9A098499;Name=OE9A098499T1;product=OE9A098499P1
OE9A046304	54.3331	-4.77634	0.65067	-7.34065	2.12561e-13	4.95414e-11	OE9A046304	ID=OE9A046304T1;Parent=OE9A046304;Name=OE9A046304T1;product=OE9A046304P1
OE9A048804	6223.34	-4.76223	0.406444	-11.7168	1.04535e-31	3.54628e-28	OE9A048804	ID=OE9A048804T1;Parent=OE9A048804;Name=OE9A048804T1;product=OE9A048804P1
OE9A013267	12.429	-4.74785	1.11465	-4.2595	2.04884e-05	0.00117144	OE9A013267	ID=OE9A013267T1;Parent=OE9A013267;Name=OE9A013267T1;product=OE9A013267P1;Description=calmodulin-binding 60 B-like;Ontology_term=GO:0005516%2C GO:0006950
OE9A118750	16.331	-4.68991	1.21769	-3.85147	0.00011741	0.00568108	OE9A118750	ID=OE9A118750T1;Parent=OE9A118750;Name=OE9A118750T1;product=OE9A118750P1;Description=probable WRKY transcription factor 17;Ontology_term=GO:0003700%2C GO:0005667%2C GO:0006355%2C GO:0043565%2C GO:0045449
OE9A094502	135.775	-4.66613	0.581312	-8.02689	9.99738e-16	3.31783e-13	OE9A094502	ID=OE9A094502T1;Parent=OE9A094502;Name=OE9A094502T1;product=OE9A094502P1;Description=NAC domain-containing 90;Ontology_term=GO:0003677%2C GO:0005634%2C GO:0006355
OE9A051495	1622.88	-4.64674	0.424353	-10.9502	6.63091e-28	1.19091e-24	OE9A051495	ID=OE9A051495T1;Parent=OE9A051495;Name=OE9A051495T1;product=OE9A051495P1;Description=ethylene-responsive transcription factor ERF017-like;Ontology_term=GO:0003677%2C GO:0003700%2C GO:0005667%2C GO:0006355%2C GO:0045449
OE9A016940	16.3421	-4.64571	1.29745	-3.58063	0.000342766	0.014515	OE9A016940	ID=OE9A016940T1;Parent=OE9A016940;Name=OE9A016940T1;product=OE9A016940P1;Description=calcium-binding PBP1-like;Ontology_term=GO:0005509
OE9A109149	127.746	-4.63218	0.765239	-6.05325	1.41957e-09	1.82878e-07	OE9A109149	ID=OE9A109149T1;Parent=OE9A109149;Name=OE9A109149T1;product=OE9A109149P1;Description=disease resistance RPM1-like;Ontology_term=GO:0043531
OE9A112468	17.1069	-4.62823	1.2428	-3.72404	0.000196064	0.00889482	OE9A112468	ID=OE9A112468T1;Parent=OE9A112468;Name=OE9A112468T1;product=OE9A112468P1;Description=xyloglucan endotransglucosylase hydrolase 2-like;Ontology_term=GO:0004553%2C GO:0005618%2C GO:0010411%2C GO:0016762%2C GO:0042546%2C GO:0048046
OE9A045820	6.43621	-4.62098	1.54701	-2.98704	0.00281692	0.080757	OE9A045820	ID=OE9A045820T1;Parent=OE9A045820;Name=OE9A045820T1;product=OE9A045820P1;Description=G-type lectin S-receptor-like serine threonine- kinase RLK1;Ontology_term=GO:0004672%2C GO:0005524%2C GO:0006468
OE9A002067	935.451	-4.60609	0.409994	-11.2345	2.75984e-29	6.01883e-26	OE9A002067	ID=OE9A002067T1;Parent=OE9A002067;Name=OE9A002067T1;product=OE9A002067P1;Description=calcium-binding PBP1-like;Ontology_term=GO:0005509
OE9A078886	202.183	-4.59196	0.456162	-10.0665	7.76682e-24	8.17712e-21	OE9A078886	ID=OE9A078886T1;Parent=OE9A078886;Name=OE9A078886T1;product=OE9A078886P1;Description=wall-associated receptor kinase 2-like;Ontology_term=GO:0004672%2C GO:0005524%2C GO:0006468
OE9A037154	25.6906	-4.5556	0.952351	-4.78352	1.72248e-06	0.000124035	OE9A037154	ID=OE9A037154T1;Parent=OE9A037154;Name=OE9A037154T1;product=OE9A037154P1
OE9A023527	4841.37	-4.52664	0.401793	-11.2661	1.92949e-29	4.90927e-26	OE9A023527	ID=OE9A023527T1;Parent=OE9A023527;Name=OE9A023527T1;product=OE9A023527P1
OE9A102910	24.2987	-4.51285	0.928351	-4.86114	1.16709e-06	8.75516e-05	OE9A102910	ID=OE9A102910T1;Parent=OE9A102910;Name=OE9A102910T1;product=OE9A102910P1;Description=ethylene-responsive transcription factor 1A-like;Ontology_term=GO:0003677%2C GO:0003700%2C GO:0005667%2C GO:0006355%2C GO:0045449
OE9A029983	14.3014	-4.50024	1.43606	-3.13375	0.0017259	0.0554102	OE9A029983	ID=OE9A029983T1;Parent=OE9A029983;Name=OE9A029983T1;product=OE9A029983P1
OE9A006362	5581.69	-4.47318	0.404223	-11.0661	1.8313e-28	3.49458e-25	OE9A006362	ID=OE9A006362T1;Parent=OE9A006362;Name=OE9A006362T1;product=OE9A006362P1
OE9A032760	491.554	-4.45644	0.444487	-10.026	1.17136e-23	1.19213e-20	OE9A032760	ID=OE9A032760T1;Parent=OE9A032760;Name=OE9A032760T1;product=OE9A032760P1;Description=probable calcium-binding CML45;Ontology_term=GO:0005509
OE9A027477	10.3121	-4.43853	1.52913	-2.90265	0.00370022	0.099188	OE9A027477	ID=OE9A027477T1;Parent=OE9A027477;Name=OE9A027477T1;product=OE9A027477P1;Description=tetratricopeptide repeat 1-like;Ontology_term=GO:0005515%2C GO:0016020
OE9A107259	10.6084	-4.43805	1.2931	-3.4321	0.000598923	0.023205	OE9A107259	ID=OE9A107259T1;Parent=OE9A107259;Name=OE9A107259T1;product=OE9A107259P1
OE9A114342	602.433	-4.43781	0.412534	-10.7575	5.46587e-27	7.94686e-24	OE9A114342	ID=OE9A114342T1;Parent=OE9A114342;Name=OE9A114342T1;product=OE9A114342P1;Description=calcium-binding PBP1-like;Ontology_term=GO:0005509
OE9A014162	17.558	-4.43434	1.41208	-3.14028	0.00168784	0.0543026	OE9A014162	ID=OE9A014162T1;Parent=OE9A014162;Name=OE9A014162T1;product=OE9A014162P1
OE9A033158	336.176	-4.39393	0.469132	-9.36608	7.52731e-21	5.22327e-18	OE9A033158	ID=OE9A033158T1;Parent=OE9A033158;Name=OE9A033158T1;product=OE9A033158P1
OE9A099186	137.994	-4.38246	0.588322	-7.44908	9.39932e-14	2.24203e-11	OE9A099186	ID=OE9A099186T1;Parent=OE9A099186;Name=OE9A099186T1;product=OE9A099186P1;Description=zinc finger ZAT10-like;Ontology_term=GO:0003676%2C GO:0046872
OE9A083708	62.8631	-4.37117	0.836563	-5.22515	1.74011e-07	1.52232e-05	OE9A083708	ID=OE9A083708T1;Parent=OE9A083708;Name=OE9A083708T1;product=OE9A083708P1;Description=probable inorganic phosphate transporter 1-9;Ontology_term=GO:0016021%2C GO:0022857%2C GO:0055085
OE9A065276	17.1041	-4.32516	0.994959	-4.34707	1.37966e-05	0.000810074	OE9A065276	ID=OE9A065276T1;Parent=OE9A065276;Name=OE9A065276T1;product=OE9A065276P1;md5=81bac2ab6db63a0b255bd05429b062ff;INTERPRO=<table><tr><th>DB</th><th>ID</th><th>Description</th></tr><tr><td>PANTHER</td><td>PTHR23155</td><td></td></tr><tr><td>PANTHER</td><td>PTHR23155:SF634</td><td></td></tr><tr><td>Pfam</td><td>PF00931</td><td>NB-ARC domain</td></tr><tr><td>SUPERFAMILY</td><td>SSF52058</td><td></td></…
OE9A061095	12.0664	-4.31088	1.13053	-3.81316	0.000137202	0.00647458	OE9A061095	ID=OE9A061095T1;Parent=OE9A061095;Name=OE9A061095T1;product=OE9A061095P1;Description=NAC domain-containing 62-like;Ontology_term=GO:0003677%2C GO:0006355
OE9A097645	1873.2	-4.30282	0.358049	-12.0174	2.87793e-33	1.46448e-29	OE9A097645	ID=OE9A097645T1;Parent=OE9A097645;Name=OE9A097645T1;product=OE9A097645P1;Description=probable WRKY transcription factor 33;Ontology_term=GO:0003700%2C GO:0005667%2C GO:0006355%2C GO:0043565%2C GO:0045449
OE9A062828	78.8309	-4.29958	0.645974	-6.65597	2.81433e-11	4.77373e-09	OE9A062828	ID=OE9A062828T1;Parent=OE9A062828;Name=OE9A062828T1;product=OE9A062828P1
OE9A020249	91.1081	-4.2964	0.682316	-6.29679	3.0388e-10	4.33555e-08	OE9A020249	ID=OE9A020249T1;Parent=OE9A020249;Name=OE9A020249T1;product=OE9A020249P1;Description=probable calcium-binding CML31;Ontology_term=GO:0005509
OE9A110715	441.53	-4.29234	0.437617	-9.80845	1.03545e-22	9.29836e-20	OE9A110715	ID=OE9A110715T1;Parent=OE9A110715;Name=OE9A110715T1;product=OE9A110715P1
OE9A056651	1454.85	-4.28223	0.351013	-12.1996	3.12174e-34	1.90626e-30	OE9A056651	ID=OE9A056651T1;Parent=OE9A056651;Name=OE9A056651T1;product=OE9A056651P1;Description=probable WRKY transcription factor 33;Ontology_term=GO:0003700%2C GO:0005667%2C GO:0006355%2C GO:0043565%2C GO:0045449
OE9A072466	2798.16	-4.27369	0.409076	-10.4472	1.50928e-25	1.84326e-22	OE9A072466	ID=OE9A072466T1;Parent=OE9A072466;Name=OE9A072466T1;product=OE9A072466P1;Description=BON1-associated 2-like;Ontology_term=GO:0005515
OE9A076184	64.2582	-4.24118	0.703945	-6.02488	1.69239e-09	2.12815e-07	OE9A076184	ID=OE9A076184T1;Parent=OE9A076184;Name=OE9A076184T1;product=OE9A076184P1;Description=ethylene-responsive transcription factor ERF017-like;Ontology_term=GO:0003677%2C GO:0003700%2C GO:0005667%2C GO:0006355%2C GO:0045449
OE9A054617	203.656	-4.23802	0.774079	-5.47492	4.37703e-08	4.26963e-06	OE9A054617	ID=OE9A054617T1;Parent=OE9A054617;Name=OE9A054617T1;product=OE9A054617P1;Description=beta-glucosidase-like;Ontology_term=GO:0004553%2C GO:0005975
OE9A077952	47.7055	-4.21837	0.761747	-5.53776	3.0637e-08	3.11814e-06	OE9A077952	ID=OE9A077952T1;Parent=OE9A077952;Name=OE9A077952T1;product=OE9A077952P1;Description=ACD11 homolog;Ontology_term=GO:0005634%2C GO:0005737%2C GO:0017089%2C GO:0046836%2C GO:0051861
OE9A013451	116.126	-4.20018	1.32485	-3.1703	0.00152281	0.0498867	OE9A013451	ID=OE9A013451T1;Parent=OE9A013451;Name=OE9A013451T1;product=OE9A013451P1;Description=NAC domain-containing 21 22-like;Ontology_term=GO:0003677%2C GO:0006355
OE9A043612	1000.12	-4.18856	0.488536	-8.57371	1.00207e-17	4.98468e-15	OE9A043612	ID=OE9A043612T1;Parent=OE9A043612;Name=OE9A043612T1;product=OE9A043612P1;Description=cytochrome P450 94C1-like;Ontology_term=GO:0004497%2C GO:0005506%2C GO:0016021%2C GO:0016705%2C GO:0020037%2C GO:0055114
OE9A104251	127.511	-4.17526	0.596652	-6.99782	2.59984e-12	5.02395e-10	OE9A104251	ID=OE9A104251T1;Parent=OE9A104251;Name=OE9A104251T1;product=OE9A104251P1
OE9A040224	31.8083	-4.15111	1.05013	-3.95293	7.72002e-05	0.00392846	OE9A040224	ID=OE9A040224T1;Parent=OE9A040224;Name=OE9A040224T1;product=OE9A040224P1;Description=aluminum-activated malate transporter 2-like;Ontology_term=GO:0009705%2C GO:0015140%2C GO:0016021%2C GO:0071423
OE9A081316	98.8038	-4.14918	1.38131	-3.0038	0.0026663	0.0775897	OE9A081316	ID=OE9A081316T1;Parent=OE9A081316;Name=OE9A081316T1;product=OE9A081316P1;Description=NAC domain-containing 21 22-like;Ontology_term=GO:0003677%2C GO:0006355
OE9A001737	27.9819	-4.10827	1.0871	-3.77912	0.000157385	0.00729176	OE9A001737	ID=OE9A001737T1;Parent=OE9A001737;Name=OE9A001737T1;product=OE9A001737P1;Description=PLANT CADMIUM RESISTANCE 2-like;Ontology_term=GO:0016021
OE9A028053	56.3948	-4.08917	0.752339	-5.43528	5.47102e-08	5.2364e-06	OE9A028053	ID=OE9A028053T1;Parent=OE9A028053;Name=OE9A028053T1;product=OE9A028053P1;Description=phospholipase A1-Igamma1, chloroplastic;Ontology_term=GO:0006629%2C GO:0016787
OE9A049811	1373.15	-4.07868	0.446677	-9.13115	6.77736e-20	4.40269e-17	OE9A049811	ID=OE9A049811T1;Parent=OE9A049811;Name=OE9A049811T1;product=OE9A049811P1;Description=zinc finger ZAT10-like;Ontology_term=GO:0046872
OE9A033879	95.2809	-4.07224	0.634077	-6.42231	1.34222e-10	2.04904e-08	OE9A033879	ID=OE9A033879T1;Parent=OE9A033879;Name=OE9A033879T1;product=OE9A033879P1;Description=ethylene-responsive transcription factor ERF109-like;Ontology_term=GO:0003677%2C GO:0003700%2C GO:0005667%2C GO:0006355%2C GO:0045449
OE9A091939	17.0808	-4.04762	0.924497	-4.37818	1.19672e-05	0.000720677	OE9A091939	ID=OE9A091939T2;Parent=OE9A091939;Name=OE9A091939T2;product=OE9A091939P2;Description=aspartic ase 2 isoform X2;Ontology_term=GO:0004190%2C GO:0006508%2C GO:0016021%2C GO:0030163
OE9A047201	818.486	-4.03918	0.416649	-9.69444	3.18382e-22	2.62725e-19	OE9A047201	ID=OE9A047201T1;Parent=OE9A047201;Name=OE9A047201T1;product=OE9A047201P1
OE9A087938	90.3507	-4.03611	0.55284	-7.30069	2.86303e-13	6.57248e-11	OE9A087938	ID=OE9A087938T1;Parent=OE9A087938;Name=OE9A087938T1;product=OE9A087938P1;Description=U-box domain-containing 21-like;Ontology_term=GO:0004842%2C GO:0005488%2C GO:0016567
OE9A091582	36.9204	-4.03155	0.743369	-5.42336	5.84901e-08	5.5633e-06	OE9A091582	ID=OE9A091582T1;Parent=OE9A091582;Name=OE9A091582T1;product=OE9A091582P1;Description=U-box domain-containing 4-like;Ontology_term=GO:0005515%2C GO:0005634%2C GO:0005737
OE9A098399	15.2655	-4.02391	1.16198	-3.46297	0.000534253	0.0212117	OE9A098399	ID=OE9A098399T1;Parent=OE9A098399;Name=OE9A098399T1;product=OE9A098399P1;Description=ethylene-responsive transcription factor 1A-like;Ontology_term=GO:0003677%2C GO:0003700%2C GO:0005667%2C GO:0006355%2C GO:0045449
OE9A004696	564.798	-4.00194	0.304091	-13.1603	1.48448e-39	4.53242e-35	OE9A004696	ID=OE9A004696T1;Parent=OE9A004696;Name=OE9A004696T1;product=OE9A004696P1;Description=mitogen-activated kinase 3;Ontology_term=GO:0000169%2C GO:0004707%2C GO:0005524%2C GO:0005622%2C GO:0007178%2C GO:0009069%2C GO:0009555%2C GO:0010120%2C GO:0010183%2C GO:0010224%2C GO:0010229%2C GO:0048481%2C GO:0080136
OE9A014582	257.974	-3.98136	0.350239	-11.3676	6.06457e-30	1.6833e-26	OE9A014582	ID=OE9A014582T1;Parent=OE9A014582;Name=OE9A014582T1;product=OE9A014582P1
OE9A101051	119.321	-3.97384	0.514469	-7.72416	1.12595e-14	3.12524e-12	OE9A101051	ID=OE9A101051T1;Parent=OE9A101051;Name=OE9A101051T1;product=OE9A101051P1
OE9A052108	5996.87	-3.96434	0.367253	-10.7946	3.65094e-27	5.57353e-24	OE9A052108	ID=OE9A052108T1;Parent=OE9A052108;Name=OE9A052108T1;product=OE9A052108P1
OE9A037727	257.229	-3.95879	0.509549	-7.76921	7.89783e-15	2.23275e-12	OE9A037727	ID=OE9A037727T1;Parent=OE9A037727;Name=OE9A037727T1;product=OE9A037727P1;Description=probable galacturonosyltransferase-like 10;Ontology_term=GO:0000271%2C GO:0005794%2C GO:0016757
OE9A037441	225.529	-3.95345	0.483224	-8.18141	2.80539e-16	1.01969e-13	OE9A037441	ID=OE9A037441T1;Parent=OE9A037441;Name=OE9A037441T1;product=OE9A037441P1
OE9A023580	3558.08	-3.94938	0.350968	-11.2528	2.2432e-29	5.26841e-26	OE9A023580	ID=OE9A023580T1;Parent=OE9A023580;Name=OE9A023580T1;product=OE9A023580P1;Description=probable calcium-binding CML45;Ontology_term=GO:0005509
OE9A008243	76.0708	-3.92109	0.54582	-7.18385	6.77758e-13	1.43704e-10	OE9A008243	ID=OE9A008243T1;Parent=OE9A008243;Name=OE9A008243T1;product=OE9A008243P1;Description=probable phosphatase 2C 25;Ontology_term=GO:0004721%2C GO:0006470%2C GO:0043169%2C GO:0044763
OE9A014390	531.827	-3.91714	0.359069	-10.9091	1.04228e-27	1.76794e-24	OE9A014390	ID=OE9A014390T1;Parent=OE9A014390;Name=OE9A014390T1;product=OE9A014390P1;Description=RING-H2 finger ATL60-like;Ontology_term=GO:0005515%2C GO:0008270%2C GO:0044267
OE9A077755	66.8993	-3.91451	0.597006	-6.5569	5.49369e-11	8.87478e-09	OE9A077755	ID=OE9A077755T1;Parent=OE9A077755;Name=OE9A077755T1;product=OE9A077755P1;Description=calcium-binding PBP1-like;Ontology_term=GO:0005509
OE9A058655	4187.01	-3.90592	0.348368	-11.2121	3.55839e-29	7.24298e-26	OE9A058655	ID=OE9A058655T1;Parent=OE9A058655;Name=OE9A058655T1;product=OE9A058655P1;Description=probable calcium-binding CML45;Ontology_term=GO:0005509
OE9A102590	286.077	-3.90583	0.49693	-7.85993	3.84348e-15	1.16187e-12	OE9A102590	ID=OE9A102590T1;Parent=OE9A102590;Name=OE9A102590T1;product=OE9A102590P1;Description=syntaxin-121-like;Ontology_term=GO:0000149%2C GO:0005484%2C GO:0005886%2C GO:0006886%2C GO:0006887%2C GO:0006906%2C GO:0012505%2C GO:0016021%2C GO:0031201%2C GO:0048278
OE9A102745	41.5389	-3.89873	0.651297	-5.98611	2.14923e-09	2.59369e-07	OE9A102745	ID=OE9A102745T1;Parent=OE9A102745;Name=OE9A102745T1;product=OE9A102745P1;Description=clathrin assembly At1g03050;Ontology_term=GO:0005545%2C GO:0030136%2C GO:0030276%2C GO:0048268
OE9A010255	1395.99	-3.88724	1.27252	-3.05474	0.00225254	0.0683591	OE9A010255	ID=OE9A010255T1;Parent=OE9A010255;Name=OE9A010255T1;product=OE9A010255P1;Description=acidic endochitinase-like;Ontology_term=GO:0004568%2C GO:0005576%2C GO:0005975%2C GO:0006032%2C GO:0008061%2C GO:0016998
OE9A003527	68.0473	-3.87454	0.568975	-6.80968	9.78176e-12	1.77772e-09	OE9A003527	ID=OE9A003527T1;Parent=OE9A003527;Name=OE9A003527T1;product=OE9A003527P1;Description=uncharacterized N-acetyltransferase p20-like;Ontology_term=GO:0006474%2C GO:0008080%2C GO:0016020%2C GO:0042967
OE9A043316	12.7063	-3.87142	1.14116	-3.39252	0.000692538	0.0260722	OE9A043316	ID=OE9A043316T1;Parent=OE9A043316;Name=OE9A043316T1;product=OE9A043316P1;Description=ethylene-responsive transcription factor ERF109-like;Ontology_term=GO:0003677%2C GO:0003700%2C GO:0005667%2C GO:0006355%2C GO:0045449
OE9A087862	18.0428	-3.84202	1.21127	-3.17189	0.00151449	0.0496675	OE9A087862	ID=OE9A087862T1;Parent=OE9A087862;Name=OE9A087862T1;product=OE9A087862P1;Description=DNA RNA polymerases superfamily;Ontology_term=GO:0003676%2C GO:0004190%2C GO:0006508%2C GO:0008270%2C GO:0015074
OE9A053553	29.2327	-3.83176	0.878818	-4.36013	1.29984e-05	0.000769121	OE9A053553	ID=OE9A053553T1;Parent=OE9A053553;Name=OE9A053553T1;product=OE9A053553P1
OE9A068607	1573.27	-3.81073	0.448748	-8.4919	2.03287e-17	8.99529e-15	OE9A068607	ID=OE9A068607T1;Parent=OE9A068607;Name=OE9A068607T1;product=OE9A068607P1;Description=calcium-binding PBP1-like;Ontology_term=GO:0005509
OE9A016847	1794.6	-3.79388	0.445895	-8.50846	1.76263e-17	8.03233e-15	OE9A016847	ID=OE9A016847T1;Parent=OE9A016847;Name=OE9A016847T1;product=OE9A016847P1
OE9A116045	520.442	-3.78407	1.22818	-3.08104	0.00206277	0.0642002	OE9A116045	ID=OE9A116045T1;Parent=OE9A116045;Name=OE9A116045T1;product=OE9A116045P1;Description=acidic endochitinase-like;Ontology_term=GO:0004568%2C GO:0005576%2C GO:0005975%2C GO:0006032%2C GO:0008061%2C GO:0016998
OE9A058641	10.9007	-3.7803	1.1078	-3.41245	0.000643822	0.0245408	OE9A058641	ID=OE9A058641T1;Parent=OE9A058641;Name=OE9A058641T1;product=OE9A058641P1;Description=ethylene-responsive transcription factor ERF014-like;Ontology_term=GO:0003677%2C GO:0003700%2C GO:0005667%2C GO:0006355%2C GO:0045449
OE9A055375	12.5044	-3.76994	1.05267	-3.5813	0.000341883	0.0144977	OE9A055375	ID=OE9A055375T1;Parent=OE9A055375;Name=OE9A055375T1;product=OE9A055375P1;Description=zinc finger ZAT10-like;Ontology_term=GO:0003676%2C GO:0046872
OE9A007593	130.104	-3.76392	0.461968	-8.14759	3.71255e-16	1.31804e-13	OE9A007593	ID=OE9A007593T1;Parent=OE9A007593;Name=OE9A007593T1;product=OE9A007593P1
OE9A117660	75.5543	-3.73883	0.73372	-5.09572	3.47411e-07	2.84374e-05	OE9A117660	ID=OE9A117660T1;Parent=OE9A117660;Name=OE9A117660T1;product=OE9A117660P1;Description=xyloglucan endotransglucosylase hydrolase 2-like;Ontology_term=GO:0004553%2C GO:0005618%2C GO:0010411%2C GO:0016762%2C GO:0042546%2C GO:0048046
OE9A009930	20.5503	-3.72677	0.971594	-3.83573	0.000125193	0.00599123	OE9A009930	ID=OE9A009930T1;Parent=OE9A009930;Name=OE9A009930T1;product=OE9A009930P1;Description=dehydration-responsive element-binding 1E-like;Ontology_term=GO:0003677%2C GO:0003700%2C GO:0005634%2C GO:0005667%2C GO:0006355%2C GO:0045449
OE9A002607	11.4283	-3.71719	1.20598	-3.08231	0.00205402	0.0640586	OE9A002607	ID=OE9A002607T1;Parent=OE9A002607;Name=OE9A002607T1;product=OE9A002607P1;md5=8eea5d7f792cf225f27beb96a1c94076;INTERPRO=<table><tr><th>DB</th><th>ID</th><th>Description</th></tr><tr><td>Coils</td><td>Coil</td><td></td></tr><tr><td>Gene3D</td><td>G3DSA:3.40.50.300</td><td></td></tr><tr><td>PANTHER</td><td>PTHR23155</td><td></td></tr><tr><td>PANTHER</td><td>PTHR23155:SF634</td><td></td></tr><tr><td>…
OE9A017749	75.0037	-3.70837	0.661938	-5.60229	2.11535e-08	2.25038e-06	OE9A017749	ID=OE9A017749T1;Parent=OE9A017749;Name=OE9A017749T1;product=OE9A017749P1
OE9A042695	119.607	-3.69597	0.601969	-6.1398	8.26261e-10	1.11626e-07	OE9A042695	ID=OE9A042695T1;Parent=OE9A042695;Name=OE9A042695T1;product=OE9A042695P1;Description=Branch domain-containing;Ontology_term=GO:0008375%2C GO:0016021
OE9A031635	6501.22	-3.69113	0.416166	-8.86938	7.35541e-19	4.01027e-16	OE9A031635	ID=OE9A031635T1;Parent=OE9A031635;Name=OE9A031635T1;product=OE9A031635P1
OE9A097757	707.524	-3.68651	0.383752	-9.6065	7.50543e-22	6.03041e-19	OE9A097757	ID=OE9A097757T1;Parent=OE9A097757;Name=OE9A097757T1;product=OE9A097757P1
OE9A090940	15.396	-3.68287	1.20536	-3.05541	0.00224751	0.0682797	OE9A090940	ID=OE9A090940T1;Parent=OE9A090940;Name=OE9A090940T1;product=OE9A090940P1;Description=calcium-binding CML38-like;Ontology_term=GO:0005509
OE9A000299	2662.81	-3.67857	0.411201	-8.94591	3.68886e-19	2.12506e-16	OE9A000299	ID=OE9A000299T1;Parent=OE9A000299;Name=OE9A000299T1;product=OE9A000299P1;Description=dehydration-responsive element-binding 1A;Ontology_term=GO:0003677%2C GO:0003700%2C GO:0005634%2C GO:0005667%2C GO:0006355%2C GO:0045449
OE9A005875	503.353	-3.65517	0.427777	-8.54457	1.29017e-17	6.06023e-15	OE9A005875	ID=OE9A005875T1;Parent=OE9A005875;Name=OE9A005875T1;product=OE9A005875P1;Description=dehydration-responsive element-binding 1E-like;Ontology_term=GO:0003677%2C GO:0003700%2C GO:0005634%2C GO:0005667%2C GO:0006355%2C GO:0045449
OE9A076786	459.522	-3.65359	0.508777	-7.18111	6.91453e-13	1.45596e-10	OE9A076786	ID=OE9A076786T1;Parent=OE9A076786;Name=OE9A076786T1;product=OE9A076786P1
OE9A024350	245.631	-3.65308	0.536722	-6.80629	1.00146e-11	1.7881e-09	OE9A024350	ID=OE9A024350T1;Parent=OE9A024350;Name=OE9A024350T1;product=OE9A024350P1
OE9A069045	203.278	-3.64333	0.73732	-4.94131	7.7598e-07	6.01326e-05	OE9A069045	ID=OE9A069045T1;Parent=OE9A069045;Name=OE9A069045T1;product=OE9A069045P1;Description=uncharacterized protein LOC111386977;Ontology_term=GO:0016020
OE9A045269	1307.8	-3.63417	0.439573	-8.26751	1.36784e-16	5.09303e-14	OE9A045269	ID=OE9A045269T1;Parent=OE9A045269;Name=OE9A045269T1;product=OE9A045269P1;Description=E3 ubiquitin- ligase PUB23-like;Ontology_term=GO:0004842%2C GO:0005488%2C GO:0016567%2C GO:0016874
OE9A060030	9.22918	-3.63288	1.01664	-3.57343	0.000352334	0.0148174	OE9A060030	ID=OE9A060030T1;Parent=OE9A060030;Name=OE9A060030T1;product=OE9A060030P1;Description=scarecrow 4;Ontology_term=GO:0003700%2C GO:0005634%2C GO:0005667%2C GO:0006355%2C GO:0043565%2C GO:0045449
OE9A089257	787.591	-3.63123	0.40407	-8.98664	2.54899e-19	1.52599e-16	OE9A089257	ID=OE9A089257T1;Parent=OE9A089257;Name=OE9A089257T1;product=OE9A089257P1;Description=probable calcium-binding CML45;Ontology_term=GO:0005509
OE9A012024	169.823	-3.62576	0.397947	-9.11116	8.15084e-20	5.18462e-17	OE9A012024	ID=OE9A012024T1;Parent=OE9A012024;Name=OE9A012024T1;product=OE9A012024P1
OE9A050273	12.7785	-3.59122	1.07465	-3.34174	0.000832538	0.0303692	OE9A050273	ID=OE9A050273T1;Parent=OE9A050273;Name=OE9A050273T1;product=OE9A050273P1;Description=glucan endo-1,3-beta-glucosidase 12-like;Ontology_term=GO:0016021
OE9A107203	633.091	-3.58198	0.375658	-9.53522	1.49563e-21	1.14161e-18	OE9A107203	ID=OE9A107203T1;Parent=OE9A107203;Name=OE9A107203T1;product=OE9A107203P1
OE9A115663	16.4289	-3.56921	1.18529	-3.01126	0.0026017	0.0760872	OE9A115663	ID=OE9A115663T1;Parent=OE9A115663;Name=OE9A115663T1;product=OE9A115663P1;Description=U-box domain-containing 21-like;Ontology_term=GO:0004842%2C GO:0005488%2C GO:0016567
OE9A003448	72.119	-3.55814	0.6877	-5.17397	2.29167e-07	1.94359e-05	OE9A003448	ID=OE9A003448T1;Parent=OE9A003448;Name=OE9A003448T1;product=OE9A003448P1
OE9A116163	71.0889	-3.55464	0.502179	-7.07842	1.45802e-12	2.96776e-10	OE9A116163	ID=OE9A116163T1;Parent=OE9A116163;Name=OE9A116163T1;product=OE9A116163P1;Description=E3 ubiquitin- ligase PUB23-like;Ontology_term=GO:0004842%2C GO:0005488%2C GO:0016567
OE9A107052	5.78062	-3.54719	1.16864	-3.03533	0.00240276	0.0717118	OE9A107052	ID=OE9A107052T1;Parent=OE9A107052;Name=OE9A107052T1;product=OE9A107052P1
OE9A087855	1297.85	-3.51731	0.435399	-8.07836	6.56457e-16	2.25202e-13	OE9A087855	ID=OE9A087855T1;Parent=OE9A087855;Name=OE9A087855T1;product=OE9A087855P1;Description=zinc finger ZAT10-like;Ontology_term=GO:0003700%2C GO:0005634%2C GO:0005667%2C GO:0043565%2C GO:0044212%2C GO:0045449%2C GO:0046872
OE9A052006	32.5015	-3.50452	0.716167	-4.89344	9.90895e-07	7.54464e-05	OE9A052006	ID=OE9A052006T1;Parent=OE9A052006;Name=OE9A052006T1;product=OE9A052006P1
OE9A005711	188.375	-3.49067	0.480429	-7.26575	3.70973e-13	8.43749e-11	OE9A005711	ID=OE9A005711T1;Parent=OE9A005711;Name=OE9A005711T1;product=OE9A005711P1;Description=tetraspanin-8-like;Ontology_term=GO:0016021
OE9A076025	102.269	-3.48412	0.41833	-8.32864	8.17797e-17	3.24273e-14	OE9A076025	ID=OE9A076025T1;Parent=OE9A076025;Name=OE9A076025T1;product=OE9A076025P1
OE9A106276	134.318	-3.47973	0.553114	-6.29117	3.15092e-10	4.47459e-08	OE9A106276	ID=OE9A106276T1;Parent=OE9A106276;Name=OE9A106276T1;product=OE9A106276P1;Description=, chromosomal-like;Ontology_term=GO:0005515%2C GO:0005524
OE9A103792	608.093	-3.47369	0.338599	-10.259	1.07792e-24	1.21893e-21	OE9A103792	ID=OE9A103792T1;Parent=OE9A103792;Name=OE9A103792T1;product=OE9A103792P1
OE9A069420	14365.6	-3.47017	0.368445	-9.4184	4.58023e-21	3.25218e-18	OE9A069420	ID=OE9A069420T1;Parent=OE9A069420;Name=OE9A069420T1;product=OE9A069420P1;Description=zinc finger CCCH domain-containing 29-like;Ontology_term=GO:0005515%2C GO:0046872
OE9A005899	421.306	-3.46939	0.414627	-8.3675	5.88532e-17	2.46152e-14	OE9A005899	ID=OE9A005899T1;Parent=OE9A005899;Name=OE9A005899T1;product=OE9A005899P1;Description=metalloendo ase 2-MMP-like;Ontology_term=GO:0004222%2C GO:0006508%2C GO:0008270%2C GO:0016021%2C GO:0031012
OE9A081748	23.032	-3.44398	0.965155	-3.56832	0.000359278	0.0150267	OE9A081748	ID=OE9A081748T1;Parent=OE9A081748;Name=OE9A081748T1;product=OE9A081748P1;Description=ethylene-responsive transcription factor ERF014-like;Ontology_term=GO:0003677%2C GO:0003700%2C GO:0005667%2C GO:0006355%2C GO:0045449
OE9A006737	711.604	-3.44172	0.383809	-8.96726	3.03981e-19	1.78484e-16	OE9A006737	ID=OE9A006737T1;Parent=OE9A006737;Name=OE9A006737T1;product=OE9A006737P1;Description=serine threonine- kinase CCR4;Ontology_term=GO:0004672%2C GO:0005524%2C GO:0006468%2C GO:0016020
OE9A052930	8.66027	-3.40593	1.00909	-3.37526	0.000737464	0.0274588	OE9A052930	ID=OE9A052930T1;Parent=OE9A052930;Name=OE9A052930T1;product=OE9A052930P1;Description=VAN3-binding isoform X1;Ontology_term=GO:0005886
OE9A010853	66.827	-3.39576	1.04805	-3.24008	0.00119498	0.0406745	OE9A010853	ID=OE9A010853T1;Parent=OE9A010853;Name=OE9A010853T1;product=OE9A010853P1;Description=F-box At3g07870-like;Ontology_term=GO:0005515
OE9A075531	589.24	-3.38612	0.394409	-8.5853	9.05959e-18	4.61012e-15	OE9A075531	ID=OE9A075531T1;Parent=OE9A075531;Name=OE9A075531T1;product=OE9A075531P1
OE9A000795	36.5648	-3.37627	0.651951	-5.17872	2.23416e-07	1.90009e-05	OE9A000795	ID=OE9A000795T1;Parent=OE9A000795;Name=OE9A000795T1;product=OE9A000795P1;Description=GATA transcription factor 8-like;Ontology_term=GO:0000785%2C GO:0000977%2C GO:0001085%2C GO:0001228%2C GO:0003682%2C GO:0005634%2C GO:0005667%2C GO:0008270%2C GO:0030154%2C GO:0045893
OE9A015473	299.572	-3.37419	0.451464	-7.47388	7.78612e-14	1.90181e-11	OE9A015473	ID=OE9A015473T1;Parent=OE9A015473;Name=OE9A015473T1;product=OE9A015473P1
OE9A020210	391.927	-3.3739	0.448071	-7.52982	5.08084e-14	1.29274e-11	OE9A020210	ID=OE9A020210T1;Parent=OE9A020210;Name=OE9A020210T1;product=OE9A020210P1;Description=E3 ubiquitin- ligase PUB23-like;Ontology_term=GO:0004842%2C GO:0005488%2C GO:0016567%2C GO:0016874
OE9A041775	1319.7	-3.36025	0.352953	-9.52041	1.72494e-21	1.28453e-18	OE9A041775	ID=OE9A041775T1;Parent=OE9A041775;Name=OE9A041775T1;product=OE9A041775P1;Description=oxalate-- ligase-like;Ontology_term=GO:0009506%2C GO:0009570%2C GO:0009735%2C GO:0009805%2C GO:0009809%2C GO:0009811%2C GO:0010030%2C GO:0010214%2C GO:0016207%2C GO:0033611%2C GO:0046487%2C GO:0048046%2C GO:0050203%2C GO:0050832
OE9A073838	14.2752	-3.3528	0.713501	-4.69909	2.61327e-06	0.000182582	OE9A073838	ID=OE9A073838T1;Parent=OE9A073838;Name=OE9A073838T1;product=OE9A073838P1;Description=ethylene-responsive transcription factor ERF027-like;Ontology_term=GO:0003677%2C GO:0003700%2C GO:0005667%2C GO:0006355%2C GO:0045449
OE9A039140	850.88	-3.34797	0.371334	-9.01606	1.94971e-19	1.19057e-16	OE9A039140	ID=OE9A039140T1;Parent=OE9A039140;Name=OE9A039140T1;product=OE9A039140P1;Description=probable calcium-binding CML45;Ontology_term=GO:0005509
OE9A093988	215.981	-3.34653	0.841638	-3.97621	7.00233e-05	0.00358116	OE9A093988	ID=OE9A093988T1;Parent=OE9A093988;Name=OE9A093988T1;product=OE9A093988P1;Description=beta-glucosidase-like;Ontology_term=GO:0004553%2C GO:0005975
OE9A103755	1865.53	-3.34256	0.324042	-10.3152	6.01556e-25	7.06412e-22	OE9A103755	ID=OE9A103755T1;Parent=OE9A103755;Name=OE9A103755T1;product=OE9A103755P1;Description=ethylene-responsive transcription factor 5-like;Ontology_term=GO:0003677%2C GO:0003700%2C GO:0005667%2C GO:0006355%2C GO:0045449
OE9A018186	21.0601	-3.3294	0.968094	-3.43913	0.000583588	0.0227562	OE9A018186	ID=OE9A018186T1;Parent=OE9A018186;Name=OE9A018186T1;product=OE9A018186P1
OE9A117633	77.8013	-3.32297	0.605303	-5.48977	4.02451e-08	3.97658e-06	OE9A117633	ID=OE9A117633T1;Parent=OE9A117633;Name=OE9A117633T1;product=OE9A117633P1;Description=NAC domain-containing 90-like;Ontology_term=GO:0003677%2C GO:0006355
OE9A073515	14.8339	-3.31593	1.12405	-2.94998	0.00317793	0.0882077	OE9A073515	ID=OE9A073515T1;Parent=OE9A073515;Name=OE9A073515T1;product=OE9A073515P1;Description=zinc finger ZAT11-like;Ontology_term=GO:0046872
OE9A071883	38.3984	-3.3127	0.803239	-4.12417	3.72068e-05	0.00202135	OE9A071883	ID=OE9A071883T1;Parent=OE9A071883;Name=OE9A071883T1;product=OE9A071883P1
OE9A064741	15.2478	-3.30991	0.966406	-3.42497	0.000614877	0.0236739	OE9A064741	ID=OE9A064741T1;Parent=OE9A064741;Name=OE9A064741T1;product=OE9A064741P1;Description=transmembrane 45B-like;Ontology_term=GO:0016020
OE9A001039	1852.29	-3.30867	0.363985	-9.09013	9.89245e-20	6.16401e-17	OE9A001039	ID=OE9A001039T1;Parent=OE9A001039;Name=OE9A001039T1;product=OE9A001039P1;Description=O-fucosyltransferase 20-like;Ontology_term=GO:0005737%2C GO:0016021
OE9A011680	276.356	-3.30752	0.511357	-6.46813	9.9226e-11	1.5457e-08	OE9A011680	ID=OE9A011680T1;Parent=OE9A011680;Name=OE9A011680T1;product=OE9A011680P1;Description=extra-large guanine nucleotide-binding 1-like;Ontology_term=GO:0003924%2C GO:0004871%2C GO:0005525%2C GO:0007186%2C GO:0031683
OE9A118289	45.1642	-3.30692	0.601236	-5.50021	3.79345e-08	3.78502e-06	OE9A118289	ID=OE9A118289T1;Parent=OE9A118289;Name=OE9A118289T1;product=OE9A118289P1;Description=cytochrome P450 81F3-like;Ontology_term=GO:0005506%2C GO:0016021%2C GO:0020037%2C GO:0033773%2C GO:0042343%2C GO:0044550%2C GO:0055114%2C GO:0098542
OE9A080338	504.467	-3.28562	0.266614	-12.3235	6.76813e-35	6.88815e-31	OE9A080338	ID=OE9A080338T1;Parent=OE9A080338;Name=OE9A080338T1;product=OE9A080338P1
OE9A121172	1280.23	-3.27944	0.370536	-8.85054	8.70998e-19	4.58505e-16	OE9A121172	ID=OE9A121172T1;Parent=OE9A121172;Name=OE9A121172T1;product=OE9A121172P1;Description=tetraspanin-8-like;Ontology_term=GO:0006811%2C GO:0016021
OE9A062775	192.155	-3.2763	0.474807	-6.90029	5.18965e-12	9.78089e-10	OE9A062775	ID=OE9A062775T1;Parent=OE9A062775;Name=OE9A062775T1;product=OE9A062775P1;Description=probable WRKY transcription factor 40;Ontology_term=GO:0002237%2C GO:0003700%2C GO:0005634%2C GO:0005667%2C GO:0031347%2C GO:0043565%2C GO:0044212%2C GO:0045449%2C GO:0045892
OE9A096749	56.0012	-3.27436	0.455385	-7.1903	6.46511e-13	1.39581e-10	OE9A096749	ID=OE9A096749T1;Parent=OE9A096749;Name=OE9A096749T1;product=OE9A096749P1;Description=NAC domain-containing 35-like;Ontology_term=GO:0003677%2C GO:0006355
OE9A004806	56.074	-3.25967	0.588628	-5.53775	3.06381e-08	3.11814e-06	OE9A004806	ID=OE9A004806T1;Parent=OE9A004806;Name=OE9A004806T1;product=OE9A004806P1
OE9A078564	277.177	-3.25794	1.0605	-3.07207	0.00212578	0.0654937	OE9A078564	ID=OE9A078564T1;Parent=OE9A078564;Name=OE9A078564T1;product=OE9A078564P1;Description=monothiol glutaredoxin-S2-like;Ontology_term=GO:0005623%2C GO:0006118%2C GO:0009055%2C GO:0015035%2C GO:0016021%2C GO:0045454%2C GO:0055114
OE9A121276	10449.9	-3.25104	0.554486	-5.86317	4.54121e-09	5.27195e-07	OE9A121276	ID=OE9A121276T1;Parent=OE9A121276;Name=OE9A121276T1;product=OE9A121276P1;Description=SENESCENCE-ASSOCIATED GENE 21, mitochondrial-like;Ontology_term=GO:0006950
OE9A013267	14.4045	-3.2402	0.974463	-3.32511	0.000883832	0.0319351	OE9A013267	ID=OE9A013267T1;Parent=OE9A013267;Name=OE9A013267T1;product=OE9A013267P1;Description=calmodulin-binding 60 B-like;Ontology_term=GO:0005516%2C GO:0006950
OE9A106923	19.7378	-3.22968	1.04851	-3.08026	0.00206822	0.064239	OE9A106923	ID=OE9A106923T1;Parent=OE9A106923;Name=OE9A106923T1;product=OE9A106923P1
OE9A065734	1222.82	-3.22641	0.323893	-9.96135	2.24993e-23	2.21596e-20	OE9A065734	ID=OE9A065734T1;Parent=OE9A065734;Name=OE9A065734T1;product=OE9A065734P1;Description=RING-H2 finger ATL3-like;Ontology_term=GO:0005515%2C GO:0008270%2C GO:0044267
OE9A083347	236.034	-3.22212	0.496375	-6.4913	8.50969e-11	1.33927e-08	OE9A083347	ID=OE9A083347T1;Parent=OE9A083347;Name=OE9A083347T1;product=OE9A083347P1;Description=lysosomal beta glucosidase-like;Ontology_term=GO:0004553%2C GO:0005975
OE9A023040	374.392	-3.20546	0.498925	-6.42474	1.32098e-10	2.02674e-08	OE9A023040	ID=OE9A023040T1;Parent=OE9A023040;Name=OE9A023040T1;product=OE9A023040P1;Description=Mediator of RNA polymerase II transcription subunit 18,;Ontology_term=GO:0016021
OE9A071927	168.115	-3.20137	0.409634	-7.81521	5.48708e-15	1.61088e-12	OE9A071927	ID=OE9A071927T1;Parent=OE9A071927;Name=OE9A071927T1;product=OE9A071927P1;Description=uncharacterized protein LOC111407381;Ontology_term=GO:0005515%2C GO:0008270
OE9A103265	1810.15	-3.20131	0.374035	-8.55885	1.14003e-17	5.52497e-15	OE9A103265	ID=OE9A103265T1;Parent=OE9A103265;Name=OE9A103265T1;product=OE9A103265P1;Description=probable calcium-binding CML45;Ontology_term=GO:0005509
OE9A016967	133.578	-3.20012	0.582041	-5.4981	3.83901e-08	3.80561e-06	OE9A016967	ID=OE9A016967T1;Parent=OE9A016967;Name=OE9A016967T1;product=OE9A016967P1;Description=ethylene-responsive transcription factor ERF014-like;Ontology_term=GO:0003677%2C GO:0003700%2C GO:0005667%2C GO:0006355%2C GO:0045449
OE9A097757	18.3639	-3.19179	0.885971	-3.60259	0.00031506	0.0134537	OE9A097757	ID=OE9A097757T1;Parent=OE9A097757;Name=OE9A097757T1;product=OE9A097757P1
OE9A033630	2209.97	-3.19111	0.409103	-7.80025	6.17828e-15	1.77958e-12	OE9A033630	ID=OE9A033630T1;Parent=OE9A033630;Name=OE9A033630T1;product=OE9A033630P1;Description=probable galacturonosyltransferase-like 9;Ontology_term=GO:0016757
OE9A002858	2368.33	-3.19068	0.373105	-8.5517	1.2129e-17	5.78627e-15	OE9A002858	ID=OE9A002858T1;Parent=OE9A002858;Name=OE9A002858T1;product=OE9A002858P1;Description=UDP-glucose 6-dehydrogenase 2-like;Ontology_term=GO:0003979%2C GO:0005982%2C GO:0005985%2C GO:0009117%2C GO:0051287%2C GO:0055114
OE9A043605	3534.02	-3.18505	0.27039	-11.7795	4.98028e-32	1.90072e-28	OE9A043605	ID=OE9A043605T1;Parent=OE9A043605;Name=OE9A043605T1;product=OE9A043605P1;Description=probable WRKY transcription factor 33;Ontology_term=GO:0003700%2C GO:0005667%2C GO:0006355%2C GO:0043565%2C GO:0045449
OE9A002219	1925.38	-3.18075	0.571701	-5.56365	2.64194e-08	2.74367e-06	OE9A002219	ID=OE9A002219T1;Parent=OE9A002219;Name=OE9A002219T1;product=OE9A002219P1;Description=ethylene-responsive transcription factor ERF017-like;Ontology_term=GO:0003677%2C GO:0003700%2C GO:0005667%2C GO:0006355%2C GO:0045449
OE9A070518	79.045	-3.16893	0.684704	-4.62817	3.68908e-06	0.000249745	OE9A070518	ID=OE9A070518T1;Parent=OE9A070518;Name=OE9A070518T1;product=OE9A070518P1;Description=acidic mammalian chitinase-like;Ontology_term=GO:0004568%2C GO:0005576%2C GO:0005975%2C GO:0006032%2C GO:0008061%2C GO:0016998
OE9A066937	7.62252	-3.16479	0.967392	-3.27147	0.0010699	0.0373327	OE9A066937	ID=OE9A066937T1;Parent=OE9A066937;Name=OE9A066937T1;product=OE9A066937P1;Description=PHR1-LIKE 3-like;Ontology_term=GO:0003677
OE9A114387	146.492	-3.1453	0.573587	-5.48356	4.16843e-08	4.1055e-06	OE9A114387	ID=OE9A114387T1;Parent=OE9A114387;Name=OE9A114387T1;product=OE9A114387P1;Description=C-repeat dehydration-responsive element-binding factor 4;Ontology_term=GO:0003677%2C GO:0003700%2C GO:0005634%2C GO:0005667%2C GO:0006355%2C GO:0045449
OE9A085767	8.6464	-3.14498	0.85962	-3.65857	0.000253622	0.0112064	OE9A085767	ID=OE9A085767T1;Parent=OE9A085767;Name=OE9A085767T1;product=OE9A085767P1;Description=Mg2+ transporter , Zinc transport;Ontology_term=GO:0016021%2C GO:0030001%2C GO:0046873%2C GO:0055085
OE9A051863	201.623	-3.14247	0.442446	-7.10249	1.22527e-12	2.51074e-10	OE9A051863	ID=OE9A051863T1;Parent=OE9A051863;Name=OE9A051863T1;product=OE9A051863P1;Description=calcium-binding PBP1-like;Ontology_term=GO:0005509
OE9A085598	51.6995	-3.13904	0.521628	-6.01777	1.76833e-09	2.19474e-07	OE9A085598	ID=OE9A085598T1;Parent=OE9A085598;Name=OE9A085598T1;product=OE9A085598P1
OE9A073161	42.9549	-3.13494	0.713758	-4.39216	1.1223e-05	0.000679881	OE9A073161	ID=OE9A073161T1;Parent=OE9A073161;Name=OE9A073161T1;product=OE9A073161P1;Description=ethylene-responsive transcription factor ERF024;Ontology_term=GO:0003677%2C GO:0003700%2C GO:0005634%2C GO:0005667%2C GO:0006355%2C GO:0045449
OE9A113289	974.526	-3.12993	0.377502	-8.29118	1.12126e-16	4.2793e-14	OE9A113289	ID=OE9A113289T1;Parent=OE9A113289;Name=OE9A113289T1;product=OE9A113289P1;Description=probable E3 ubiquitin- ligase XERICO;Ontology_term=GO:0005515%2C GO:0008270%2C GO:0016020
OE9A080031	16.2896	-3.12725	0.983267	-3.18047	0.00147036	0.0488308	OE9A080031	ID=OE9A080031T1;Parent=OE9A080031;Name=OE9A080031T1;product=OE9A080031P1;Description=phospholipase D alpha 1;Ontology_term=GO:0004630%2C GO:0005509%2C GO:0005515%2C GO:0005773%2C GO:0005783%2C GO:0005886%2C GO:0009395%2C GO:0009536%2C GO:0046470%2C GO:0070290
OE9A020664	57.2888	-3.1246	0.605987	-5.15622	2.51985e-07	2.11945e-05	OE9A020664	ID=OE9A020664T1;Parent=OE9A020664;Name=OE9A020664T1;product=OE9A020664P1
OE9A034558	11.9531	-3.12086	0.76547	-4.07705	4.56105e-05	0.00245605	OE9A034558	ID=OE9A034558T1;Parent=OE9A034558;Name=OE9A034558T1;product=OE9A034558P1;Description=heavy metal-associated isoprenylated plant 3-like isoform X1;Ontology_term=GO:0030001%2C GO:0046872
OE9A104327	867.388	-3.11552	0.383575	-8.12234	4.57288e-16	1.60482e-13	OE9A104327	ID=OE9A104327T1;Parent=OE9A104327;Name=OE9A104327T1;product=OE9A104327P1;Description=uncharacterized protein LOC105179443;Ontology_term=GO:0016021
OE9A004162	292.959	-3.11291	0.463482	-6.71635	1.86332e-11	3.22497e-09	OE9A004162	ID=OE9A004162T2;Parent=OE9A004162;Name=OE9A004162T2;product=OE9A004162P1;Description=probable WRKY transcription factor 23;Ontology_term=GO:0003700%2C GO:0005667%2C GO:0006355%2C GO:0043565%2C GO:0045449
OE9A113221	20.1657	-3.11154	1.07166	-2.90349	0.00369031	0.0990092	OE9A113221	ID=OE9A113221T1;Parent=OE9A113221;Name=OE9A113221T1;product=OE9A113221P1;Description=serine carboxypeptidase-like 31;Ontology_term=GO:0004185%2C GO:0016021%2C GO:0051603
OE9A075123	797.347	-3.10871	0.375781	-8.27267	1.30995e-16	4.93771e-14	OE9A075123	ID=OE9A075123T1;Parent=OE9A075123;Name=OE9A075123T1;product=OE9A075123P1;Description=ethylene-responsive transcription factor 5-like;Ontology_term=GO:0003677%2C GO:0003700%2C GO:0005667%2C GO:0006355%2C GO:0045449
OE9A040473	50.4995	-3.08953	0.501778	-6.15716	7.406e-10	1.00498e-07	OE9A040473	ID=OE9A040473T1;Parent=OE9A040473;Name=OE9A040473T1;product=OE9A040473P1
OE9A043040	10623.8	-3.08644	0.360038	-8.57255	1.01222e-17	4.98468e-15	OE9A043040	ID=OE9A043040T1;Parent=OE9A043040;Name=OE9A043040T1;product=OE9A043040P1;Description=zinc finger CCCH domain-containing 29-like;Ontology_term=GO:0005515%2C GO:0046872
OE9A006386	5478.76	-3.08471	0.366468	-8.4174	3.84945e-17	1.63238e-14	OE9A006386	ID=OE9A006386T1;Parent=OE9A006386;Name=OE9A006386T1;product=OE9A006386P1;Description=zinc finger CCCH domain-containing 29-like;Ontology_term=GO:0005515%2C GO:0046872
OE9A107254	65.1213	-3.0546	0.635918	-4.80345	1.55957e-06	0.000113104	OE9A107254	ID=OE9A107254T1;Parent=OE9A107254;Name=OE9A107254T1;product=OE9A107254P1;Description=hypothetical protein DCAR_020470;Ontology_term=GO:0016020
OE9A047641	32.606	-3.05194	1.01166	-3.01678	0.00255476	0.0752189	OE9A047641	ID=OE9A047641T1;Parent=OE9A047641;Name=OE9A047641T1;product=OE9A047641P1;Description=adenine guanine permease AZG2;Ontology_term=GO:0005345%2C GO:0016021%2C GO:1904823
OE9A085084	60.0086	-3.05168	0.591724	-5.15727	2.50582e-07	2.11348e-05	OE9A085084	ID=OE9A085084T1;Parent=OE9A085084;Name=OE9A085084T1;product=OE9A085084P1;Description=(-)-isopiperitenol (-)-carveol dehydrogenase, mitochondrial-like;Ontology_term=GO:0016491
OE9A077003	64.2862	-3.04193	0.759278	-4.00634	6.1666e-05	0.00321295	OE9A077003	ID=OE9A077003T1;Parent=OE9A077003;Name=OE9A077003T1;product=OE9A077003P1;Description=NUCLEAR FUSION DEFECTIVE 4-like;Ontology_term=GO:0016021%2C GO:0055085
OE9A063541	126.55	-3.03457	0.483476	-6.27658	3.46112e-10	4.89235e-08	OE9A063541	ID=OE9A063541T1;Parent=OE9A063541;Name=OE9A063541T1;product=OE9A063541P1
OE9A032181	88.1157	-3.03444	0.756511	-4.01109	6.04381e-05	0.00316517	OE9A032181	ID=OE9A032181T1;Parent=OE9A032181;Name=OE9A032181T1;product=OE9A032181P1
OE9A115883	1235.22	-3.03392	0.391406	-7.75133	9.09361e-15	2.54721e-12	OE9A115883	ID=OE9A115883T1;Parent=OE9A115883;Name=OE9A115883T1;product=OE9A115883P1;Description=calcium-binding CML19;Ontology_term=GO:0005509
OE9A064506	1376.56	-3.0213	0.393894	-7.67034	1.7154e-14	4.55432e-12	OE9A064506	ID=OE9A064506T1;Parent=OE9A064506;Name=OE9A064506T1;product=OE9A064506P1;Description=COBRA 7;Ontology_term=GO:0010215%2C GO:0016021%2C GO:0016049%2C GO:0031225
OE9A091063	107.794	-3.01454	0.626995	-4.80792	1.5251e-06	0.000110867	OE9A091063	ID=OE9A091063T1;Parent=OE9A091063;Name=OE9A091063T1;product=OE9A091063P1;Description=Mediator of RNA polymerase II transcription subunit 18,;Ontology_term=GO:0016020
OE9A016793	8378.82	-3.01028	0.36005	-8.36074	6.23275e-17	2.5716e-14	OE9A016793	ID=OE9A016793T1;Parent=OE9A016793;Name=OE9A016793T1;product=OE9A016793P1;Description=E3 ubiquitin- ligase RING1;Ontology_term=GO:0005515%2C GO:0008270
OE9A107599	5.79136	-3.00199	0.98589	-3.04495	0.00232718	0.0698658	OE9A107599	ID=OE9A107599T1;Parent=OE9A107599;Name=OE9A107599T1;product=OE9A107599P1;Description=uncharacterized WD repeat-containing -like isoform X2;Ontology_term=GO:0005515
OE9A084147	56.746	-3.00122	0.428554	-7.00313	2.50302e-12	4.86765e-10	OE9A084147	ID=OE9A084147T1;Parent=OE9A084147;Name=OE9A084147T1;product=OE9A084147P1
OE9A117672	70.8832	-2.9899	0.815028	-3.66846	0.000244018	0.010829	OE9A117672	ID=OE9A117672T1;Parent=OE9A117672;Name=OE9A117672T1;product=OE9A117672P1;Description=beta-glucosidase-like;Ontology_term=GO:0004553%2C GO:0005975
OE9A045580	207.502	-2.98615	0.909669	-3.28268	0.00102826	0.0361275	OE9A045580	ID=OE9A045580T1;Parent=OE9A045580;Name=OE9A045580T1;product=OE9A045580P1
OE9A015716	110.496	-2.98244	0.510537	-5.84176	5.16533e-09	5.97378e-07	OE9A015716	ID=OE9A015716T1;Parent=OE9A015716;Name=OE9A015716T1;product=OE9A015716P1;Description=NAC domain-containing 90;Ontology_term=GO:0003677%2C GO:0005634%2C GO:0006355
OE9A039679	135.358	-2.98065	0.423196	-7.0432	1.87873e-12	3.72478e-10	OE9A039679	ID=OE9A039679T1;Parent=OE9A039679;Name=OE9A039679T1;product=OE9A039679P1
OE9A033010	18.8651	-2.98003	0.750297	-3.9718	7.13306e-05	0.00364191	OE9A033010	ID=OE9A033010T1;Parent=OE9A033010;Name=OE9A033010T1;product=OE9A033010P1;Description=NDR1-like;Ontology_term=GO:0005886
OE9A049687	434.782	-2.9647	0.312581	-9.48458	2.43369e-21	1.76918e-18	OE9A049687	ID=OE9A049687T1;Parent=OE9A049687;Name=OE9A049687T1;product=OE9A049687P1
OE9A083464	102.772	-2.95925	0.630883	-4.69065	2.72339e-06	0.000189409	OE9A083464	ID=OE9A083464T1;Parent=OE9A083464;Name=OE9A083464T1;product=OE9A083464P1
OE9A057709	901.383	-2.95748	0.828232	-3.57083	0.000355848	0.0149447	OE9A057709	ID=OE9A057709T3;Parent=OE9A057709;Name=OE9A057709T3;product=OE9A057709P1;Description=F-box kelch-repeat SKIP11-like;Ontology_term=GO:0005515
OE9A082695	44.6047	-2.94728	0.556882	-5.29247	1.20674e-07	1.0933e-05	OE9A082695	ID=OE9A082695T1;Parent=OE9A082695;Name=OE9A082695T1;product=OE9A082695P1;Description=RHOMBOID 2;Ontology_term=GO:0004252%2C GO:0016021%2C GO:0016485
OE9A107679	21.3788	-2.94228	0.88407	-3.32811	0.000874374	0.0316308	OE9A107679	ID=OE9A107679T1;Parent=OE9A107679;Name=OE9A107679T1;product=OE9A107679P1;Description=probable calcium-binding CML44;Ontology_term=GO:0005509
OE9A028341	673.545	-2.93478	0.488944	-6.00228	1.94571e-09	2.3751e-07	OE9A028341	ID=OE9A028341T1;Parent=OE9A028341;Name=OE9A028341T1;product=OE9A028341P1;Description=C-repeat dehydration-responsive element-binding factor 4;Ontology_term=GO:0003677%2C GO:0003700%2C GO:0005634%2C GO:0005667%2C GO:0006355%2C GO:0045449
OE9A079040	23.523	-2.93424	0.742383	-3.95246	7.73525e-05	0.00392966	OE9A079040	ID=OE9A079040T1;Parent=OE9A079040;Name=OE9A079040T1;product=OE9A079040P1
OE9A092877	29.186	-2.92097	0.696841	-4.19174	2.76827e-05	0.00153395	OE9A092877	ID=OE9A092877T1;Parent=OE9A092877;Name=OE9A092877T1;product=OE9A092877P1;Description=probable phosphatase 2C 73;Ontology_term=GO:0004722%2C GO:0006470%2C GO:0008287
OE9A090698	7832.35	-2.91287	0.407979	-7.13974	9.35046e-13	1.92898e-10	OE9A090698	ID=OE9A090698T1;Parent=OE9A090698;Name=OE9A090698T1;product=OE9A090698P1;Description=mitochondrial uncoupling 5-like;Ontology_term=GO:0003735%2C GO:0005840%2C GO:0006412%2C GO:0006839%2C GO:0016021%2C GO:0031966%2C GO:0042254
OE9A108402	392.139	-2.89322	0.363432	-7.96083	1.70894e-15	5.55077e-13	OE9A108402	ID=OE9A108402T1;Parent=OE9A108402;Name=OE9A108402T1;product=OE9A108402P1;Description=probable WRKY transcription factor 46;Ontology_term=GO:0003700%2C GO:0005667%2C GO:0006355%2C GO:0043565%2C GO:0045449
OE9A075686	14.4927	-2.89153	0.957392	-3.02022	0.00252593	0.074669	OE9A075686	ID=OE9A075686T1;Parent=OE9A075686;Name=OE9A075686T1;product=OE9A075686P1;Description=E3 ubiquitin- ligase PUB23-like;Ontology_term=GO:0004842%2C GO:0005488%2C GO:0016567
OE9A027105	50.9487	-2.89072	0.712315	-4.05821	4.94507e-05	0.00263956	OE9A027105	ID=OE9A027105T1;Parent=OE9A027105;Name=OE9A027105T1;product=OE9A027105P1;Description=ankyrin repeat-containing At3g12360-like;Ontology_term=GO:0005515
OE9A050117	75.6542	-2.89009	0.569243	-5.07708	3.83282e-07	3.09586e-05	OE9A050117	ID=OE9A050117T1;Parent=OE9A050117;Name=OE9A050117T1;product=OE9A050117P1
OE9A079911	872.18	-2.87898	0.616755	-4.66795	3.04226e-06	0.000209203	OE9A079911	ID=OE9A079911T1;Parent=OE9A079911;Name=OE9A079911T1;product=OE9A079911P1;Description=ethylene-responsive transcription factor ERF109-like;Ontology_term=GO:0003677%2C GO:0003700%2C GO:0005667%2C GO:0006355%2C GO:0045449
OE9A056063	125.529	-2.87549	0.839401	-3.42565	0.000613335	0.0236444	OE9A056063	ID=OE9A056063T1;Parent=OE9A056063;Name=OE9A056063T1;product=OE9A056063P1;Description=ethylene-responsive transcription factor ERF003-like;Ontology_term=GO:0003677%2C GO:0003700%2C GO:0005634%2C GO:0005667%2C GO:0006355%2C GO:0045449
OE9A093962	86.5747	-2.87524	0.505276	-5.69043	1.26716e-08	1.39671e-06	OE9A093962	ID=OE9A093962T1;Parent=OE9A093962;Name=OE9A093962T1;product=OE9A093962P1
OE9A002541	16847.3	-2.87418	0.427969	-6.71586	1.86958e-11	3.22497e-09	OE9A002541	ID=OE9A002541T1;Parent=OE9A002541;Name=OE9A002541T1;product=OE9A002541P1
OE9A097302	145.949	-2.87091	0.431798	-6.64874	2.95617e-11	4.95921e-09	OE9A097302	ID=OE9A097302T1;Parent=OE9A097302;Name=OE9A097302T1;product=OE9A097302P1;Description=uncharacterized protein LOC111407381;Ontology_term=GO:0005515%2C GO:0008270
OE9A047454	37.1546	-2.86758	0.753375	-3.80632	0.000141053	0.00661538	OE9A047454	ID=OE9A047454T1;Parent=OE9A047454;Name=OE9A047454T1;product=OE9A047454P1;Description=ethylene-responsive transcription factor ERF109-like;Ontology_term=GO:0003677%2C GO:0003700%2C GO:0005667%2C GO:0006355%2C GO:0045449
OE9A001564	152.355	-2.86684	0.430119	-6.66523	2.6426e-11	4.50748e-09	OE9A001564	ID=OE9A001564T1;Parent=OE9A001564;Name=OE9A001564T1;product=OE9A001564P1;Description=probable phosphatase 2C 63;Ontology_term=GO:0004722%2C GO:0006470%2C GO:0008287%2C GO:0046872
OE9A055836	43.6731	-2.86628	0.742093	-3.86243	0.000112266	0.00547556	OE9A055836	ID=OE9A055836T1;Parent=OE9A055836;Name=OE9A055836T1;product=OE9A055836P1;Description=late embryogenesis abundant At1g64065-like;Ontology_term=GO:0016020
OE9A089731	464.046	-2.86626	0.336981	-8.50571	1.80492e-17	8.10408e-15	OE9A089731	ID=OE9A089731T1;Parent=OE9A089731;Name=OE9A089731T1;product=OE9A089731P1;Description=scarecrow 21;Ontology_term=GO:0006355
OE9A009638	690.614	-2.85672	0.364056	-7.84692	4.26393e-15	1.27634e-12	OE9A009638	ID=OE9A009638T1;Parent=OE9A009638;Name=OE9A009638T1;product=OE9A009638P1;Description=phosphatidylinositol:ceramide inositolphosphotransferase 2-like;Ontology_term=GO:0016021
OE9A118827	281.681	-2.8457	0.457761	-6.21656	5.08187e-10	7.08492e-08	OE9A118827	ID=OE9A118827T1;Parent=OE9A118827;Name=OE9A118827T1;product=OE9A118827P1;Description=ethylene-responsive transcription factor ERF014-like;Ontology_term=GO:0003677%2C GO:0003700%2C GO:0005667%2C GO:0006355%2C GO:0045449
OE9A115757	125.087	-2.84443	0.602501	-4.72103	2.34648e-06	0.000165076	OE9A115757	ID=OE9A115757T1;Parent=OE9A115757;Name=OE9A115757T1;product=OE9A115757P1;Description=ankyrin repeat-containing At3g12360-like;Ontology_term=GO:0005515%2C GO:0007165%2C GO:0016020
OE9A085648	842.257	-2.83996	0.394946	-7.19076	6.44335e-13	1.39581e-10	OE9A085648	ID=OE9A085648T1;Parent=OE9A085648;Name=OE9A085648T1;product=OE9A085648P1;Description=zinc finger A20 and AN1 domain-containing stress-associated 4-like;Ontology_term=GO:0003677%2C GO:0008270
OE9A095575	19.9851	-2.82944	0.836445	-3.3827	0.000717772	0.0268566	OE9A095575	ID=OE9A095575T1;Parent=OE9A095575;Name=OE9A095575T1;product=OE9A095575P1;Description=leucine-rich repeat receptor-like serine threonine tyrosine- kinase SOBIR1;Ontology_term=GO:0004674%2C GO:0005515%2C GO:0005524%2C GO:0006468%2C GO:0009069%2C GO:0016020%2C GO:0048518
OE9A095768	4904.69	-2.82671	0.442189	-6.39254	1.63151e-10	2.39487e-08	OE9A095768	ID=OE9A095768T1;Parent=OE9A095768;Name=OE9A095768T1;product=OE9A095768P1;Description=mitochondrial uncoupling 5-like;Ontology_term=GO:0003735%2C GO:0005840%2C GO:0006412%2C GO:0006839%2C GO:0016021%2C GO:0031966%2C GO:0042254%2C GO:0055085
OE9A025047	149.032	-2.80286	0.411725	-6.80761	9.92331e-12	1.78223e-09	OE9A025047	ID=OE9A025047T1;Parent=OE9A025047;Name=OE9A025047T1;product=OE9A025047P1
OE9A121134	33.954	-2.78912	0.622175	-4.48285	7.36512e-06	0.000463653	OE9A121134	ID=OE9A121134T1;Parent=OE9A121134;Name=OE9A121134T1;product=OE9A121134P1
OE9A075408	467.471	-2.78867	0.388733	-7.17374	7.29756e-13	1.52609e-10	OE9A075408	ID=OE9A075408T1;Parent=OE9A075408;Name=OE9A075408T1;product=OE9A075408P1;Description=syntaxin-121-like;Ontology_term=GO:0000149%2C GO:0005484%2C GO:0005886%2C GO:0006886%2C GO:0006887%2C GO:0006906%2C GO:0012505%2C GO:0016021%2C GO:0031201%2C GO:0048278
OE9A082944	215.753	-2.77431	0.355084	-7.8131	5.57982e-15	1.6225e-12	OE9A082944	ID=OE9A082944T1;Parent=OE9A082944;Name=OE9A082944T1;product=OE9A082944P1;Description=Serine threonine kinase;Ontology_term=GO:0004672%2C GO:0005524%2C GO:0006468
OE9A017022	42.8874	-2.7729	0.717466	-3.86485	0.000111157	0.00543013	OE9A017022	ID=OE9A017022T1;Parent=OE9A017022;Name=OE9A017022T1;product=OE9A017022P1;Description=glycerophosphodiester phosphodiesterase GDPDL3-like;Ontology_term=GO:0006071%2C GO:0008889%2C GO:0009395%2C GO:0016021%2C GO:0046486
OE9A038398	7134.95	-2.77082	0.447552	-6.19105	5.97656e-10	8.25685e-08	OE9A038398	ID=OE9A038398T1;Parent=OE9A038398;Name=OE9A038398T1;product=OE9A038398P1;Description=SENESCENCE-ASSOCIATED GENE 21, mitochondrial-like;Ontology_term=GO:0006950
OE9A003079	15.3627	-2.77037	0.951061	-2.91293	0.00358056	0.0967448	OE9A003079	ID=OE9A003079T1;Parent=OE9A003079;Name=OE9A003079T1;product=OE9A003079P1
OE9A032354	4053.55	-2.76537	0.361791	-7.64355	2.11314e-14	5.46766e-12	OE9A032354	ID=OE9A032354T1;Parent=OE9A032354;Name=OE9A032354T1;product=OE9A032354P1;Description=heavy metal-associated isoprenylated plant 3-like;Ontology_term=GO:0030001%2C GO:0046872
OE9A001769	18.0125	-2.76275	0.925929	-2.98376	0.00284729	0.0814748	OE9A001769	ID=OE9A001769T1;Parent=OE9A001769;Name=OE9A001769T1;product=OE9A001769P1;Description=chlorophyll a-b binding 13, chloroplastic;Ontology_term=GO:0005198%2C GO:0009522%2C GO:0009535%2C GO:0009765%2C GO:0016021%2C GO:0016168%2C GO:0018298%2C GO:0046872
OE9A084330	614.482	-2.75286	0.369182	-7.45665	8.87481e-14	2.13359e-11	OE9A084330	ID=OE9A084330T1;Parent=OE9A084330;Name=OE9A084330T1;product=OE9A084330P1;Description=ethylene-responsive transcription factor 5-like;Ontology_term=GO:0003677%2C GO:0003700%2C GO:0005667%2C GO:0006355%2C GO:0045449
OE9A098085	58.7765	-2.75252	0.597244	-4.60871	4.0518e-06	0.000272488	OE9A098085	ID=OE9A098085T1;Parent=OE9A098085;Name=OE9A098085T1;product=OE9A098085P1;Description=receptor kinase 5;Ontology_term=GO:0004672%2C GO:0005515%2C GO:0005524%2C GO:0006468%2C GO:0016020
OE9A100031	139.561	-2.7512	0.429887	-6.39983	1.55551e-10	2.29435e-08	OE9A100031	ID=OE9A100031T1;Parent=OE9A100031;Name=OE9A100031T1;product=OE9A100031P1;Description=calmodulin-binding 60 C;Ontology_term=GO:0005516%2C GO:0006950%2C GO:0009617%2C GO:0050789
OE9A028561	15.0144	-2.75038	0.900134	-3.05552	0.00224672	0.0682797	OE9A028561	ID=OE9A028561T1;Parent=OE9A028561;Name=OE9A028561T1;product=OE9A028561P1;Description=mitogen-activated kinase kinase kinase YODA-like;Ontology_term=GO:0004672%2C GO:0005524%2C GO:0006468
OE9A072634	24.8761	-2.74974	0.762658	-3.60547	0.000311583	0.0133426	OE9A072634	ID=OE9A072634T1;Parent=OE9A072634;Name=OE9A072634T1;product=OE9A072634P1;Description=Serine threonine kinase;Ontology_term=GO:0005509%2C GO:0005515%2C GO:0030247
OE9A069927	1335.98	-2.74782	0.359187	-7.65013	2.0077e-14	5.23924e-12	OE9A069927	ID=OE9A069927T1;Parent=OE9A069927;Name=OE9A069927T1;product=OE9A069927P1
OE9A099983	2899.57	-2.74726	0.307604	-8.93113	4.21675e-19	2.38418e-16	OE9A099983	ID=OE9A099983T1;Parent=OE9A099983;Name=OE9A099983T1;product=OE9A099983P1;Description=ethylene-responsive transcription factor 5-like;Ontology_term=GO:0003677%2C GO:0003700%2C GO:0005667%2C GO:0006355%2C GO:0045449
OE9A049987	50.3232	-2.74631	0.493342	-5.56675	2.5953e-08	2.70442e-06	OE9A049987	ID=OE9A049987T1;Parent=OE9A049987;Name=OE9A049987T1;product=OE9A049987P1;Description=NDR1-like;Ontology_term=GO:0005886
OE9A085531	139.305	-2.74188	0.631232	-4.3437	1.40103e-05	0.00082104	OE9A085531	ID=OE9A085531T1;Parent=OE9A085531;Name=OE9A085531T1;product=OE9A085531P1;Description=xyloglucan endotransglucosylase hydrolase 2;Ontology_term=GO:0004553%2C GO:0005618%2C GO:0010411%2C GO:0016762%2C GO:0042546%2C GO:0048046%2C GO:0071555
OE9A064167	524.188	-2.7384	0.429799	-6.37136	1.87355e-10	2.72396e-08	OE9A064167	ID=OE9A064167T1;Parent=OE9A064167;Name=OE9A064167T1;product=OE9A064167P1;Description=L-ascorbate oxidase homolog;Ontology_term=GO:0005507%2C GO:0006118%2C GO:0008447%2C GO:0009505%2C GO:0009506%2C GO:0016722%2C GO:0019852%2C GO:0055114
OE9A006285	15.0031	-2.73416	0.900268	-3.03705	0.00238903	0.0715331	OE9A006285	ID=OE9A006285T1;Parent=OE9A006285;Name=OE9A006285T1;product=OE9A006285P1;Description=FT-interacting 1-like;Ontology_term=GO:0005515%2C GO:0016021
OE9A008777	3378.28	-2.73303	0.349461	-7.8207	5.25311e-15	1.55717e-12	OE9A008777	ID=OE9A008777T1;Parent=OE9A008777;Name=OE9A008777T1;product=OE9A008777P1;Description=heavy metal-associated isoprenylated plant 3-like;Ontology_term=GO:0030001%2C GO:0046872
OE9A060701	131.507	-2.72921	0.451367	-6.04654	1.4799e-09	1.89312e-07	OE9A060701	ID=OE9A060701T1;Parent=OE9A060701;Name=OE9A060701T1;product=OE9A060701P1;Description=Spindle pole body;Ontology_term=GO:0015031
OE9A004416	196.393	-2.72511	0.343655	-7.92979	2.1952e-15	6.98165e-13	OE9A004416	ID=OE9A004416T1;Parent=OE9A004416;Name=OE9A004416T1;product=OE9A004416P1;Description=mitogen-activated kinase kinase kinase YODA-like;Ontology_term=GO:0004702%2C GO:0005524%2C GO:0005737%2C GO:0006468%2C GO:0007178%2C GO:0009069
OE9A048783	208.104	-2.72324	0.378823	-7.18868	6.54214e-13	1.39682e-10	OE9A048783	ID=OE9A048783T1;Parent=OE9A048783;Name=OE9A048783T1;product=OE9A048783P1;Description=diacylglycerol kinase 2;Ontology_term=GO:0004143%2C GO:0005524%2C GO:0005622%2C GO:0007205%2C GO:0009395%2C GO:0016021%2C GO:0016310%2C GO:0035556%2C GO:0046486%2C GO:0048364%2C GO:0048366
OE9A010597	15.3174	-2.72123	0.708765	-3.83939	0.000123339	0.00591238	OE9A010597	ID=OE9A010597T1;Parent=OE9A010597;Name=OE9A010597T1;product=OE9A010597P1;Description=monocopper oxidase SKU5;Ontology_term=GO:0005507%2C GO:0009505%2C GO:0009506%2C GO:0016722%2C GO:0046658%2C GO:0055114
OE9A078302	853.815	-2.7115	0.334858	-8.09745	5.61232e-16	1.94722e-13	OE9A078302	ID=OE9A078302T1;Parent=OE9A078302;Name=OE9A078302T1;product=OE9A078302P1;Description=purple acid phosphatase 22-like;Ontology_term=GO:0003993%2C GO:0006771%2C GO:0016311%2C GO:0019497%2C GO:0046872
OE9A104316	5998.19	-2.70697	0.295425	-9.16296	5.04933e-20	3.35144e-17	OE9A104316	ID=OE9A104316T1;Parent=OE9A104316;Name=OE9A104316T1;product=OE9A104316P1;Description=scarecrow 13;Ontology_term=GO:0003700%2C GO:0005634%2C GO:0005667%2C GO:0006355%2C GO:0043565%2C GO:0045449
OE9A036280	64.7963	-2.70572	0.438634	-6.16852	6.89337e-10	9.42405e-08	OE9A036280	ID=OE9A036280T1;Parent=OE9A036280;Name=OE9A036280T1;product=OE9A036280P1;Description=late embryogenesis abundant At1g64065-like;Ontology_term=GO:0016020
OE9A014402	65.4935	-2.70242	0.530094	-5.098	3.43259e-07	2.8249e-05	OE9A014402	ID=OE9A014402T1;Parent=OE9A014402;Name=OE9A014402T1;product=OE9A014402P1;Description=auxin-responsive SAUR32-like;Ontology_term=GO:0009733
OE9A091786	72.2713	-2.70011	0.594781	-4.53967	5.6343e-06	0.000364463	OE9A091786	ID=OE9A091786T1;Parent=OE9A091786;Name=OE9A091786T1;product=OE9A091786P1;Description=zinc finger ZAT11-like;Ontology_term=GO:0003700%2C GO:0005634%2C GO:0005667%2C GO:0010200%2C GO:0043565%2C GO:0044212%2C GO:0045449%2C GO:0046872
OE9A026115	63.0533	-2.69854	0.708542	-3.80858	0.000139768	0.00656523	OE9A026115	ID=OE9A026115T1;Parent=OE9A026115;Name=OE9A026115T1;product=OE9A026115P1;Description=serine threonine- kinase At5g01020-like;Ontology_term=GO:0004672%2C GO:0005515%2C GO:0005524%2C GO:0006468
OE9A117358	14.991	-2.69236	0.76942	-3.49921	0.000466633	0.0187679	OE9A117358	ID=OE9A117358T1;Parent=OE9A117358;Name=OE9A117358T1;product=OE9A117358P1;Description=receptor 12;Ontology_term=GO:0005515
OE9A110673	817.196	-2.69075	0.307847	-8.74055	2.31988e-18	1.20052e-15	OE9A110673	ID=OE9A110673T1;Parent=OE9A110673;Name=OE9A110673T1;product=OE9A110673P1;Description=FT-interacting 1;Ontology_term=GO:0005515%2C GO:0016021
OE9A085544	215.542	-2.6898	0.480832	-5.59406	2.21822e-08	2.35162e-06	OE9A085544	ID=OE9A085544T1;Parent=OE9A085544;Name=OE9A085544T1;product=OE9A085544P1;Description=glycerophosphodiester phosphodiesterase gdpdl4;Ontology_term=GO:0006071%2C GO:0008889%2C GO:0009395%2C GO:0016021%2C GO:0046486
OE9A036716	780.001	-2.67875	0.2728	-9.81944	9.28557e-23	8.59112e-20	OE9A036716	ID=OE9A036716T1;Parent=OE9A036716;Name=OE9A036716T1;product=OE9A036716P1;Description=probable inorganic phosphate transporter 1-9;Ontology_term=GO:0016021%2C GO:0022857%2C GO:0055085
OE9A096223	105.835	-2.67637	0.539635	-4.9596	7.06375e-07	5.51587e-05	OE9A096223	ID=OE9A096223T1;Parent=OE9A096223;Name=OE9A096223T1;product=OE9A096223P1;Description=ethylene-responsive transcription factor ERF017-like;Ontology_term=GO:0003677%2C GO:0003700%2C GO:0005667%2C GO:0006355%2C GO:0045449
OE9A034668	93.3787	-2.6744	0.575781	-4.64482	3.40378e-06	0.000231973	OE9A034668	ID=OE9A034668T1;Parent=OE9A034668;Name=OE9A034668T1;product=OE9A034668P1;Description=glutaredoxin-C9-like;Ontology_term=GO:0005623%2C GO:0006118%2C GO:0009055%2C GO:0015035%2C GO:0045454%2C GO:0055114
OE9A043355	3449.35	-2.67097	0.348963	-7.654	1.94816e-14	5.12768e-12	OE9A043355	ID=OE9A043355T1;Parent=OE9A043355;Name=OE9A043355T1;product=OE9A043355P1
OE9A081134	4231.96	-2.66967	0.21477	-12.4303	1.7888e-35	2.73079e-31	OE9A081134	ID=OE9A081134T1;Parent=OE9A081134;Name=OE9A081134T1;product=OE9A081134P1;Description=probable WRKY transcription factor 46;Ontology_term=GO:0003700%2C GO:0005667%2C GO:0006355%2C GO:0043565%2C GO:0045449
OE9A087218	20.0919	-2.66559	0.829634	-3.21297	0.00131369	0.0443463	OE9A087218	ID=OE9A087218T1;Parent=OE9A087218;Name=OE9A087218T1;product=OE9A087218P1;Description=exocyst complex component EXO70H1-like;Ontology_term=GO:0000145%2C GO:0006887
OE9A051211	246.02	-2.66258	0.73923	-3.60182	0.000315991	0.0134746	OE9A051211	ID=OE9A051211T1;Parent=OE9A051211;Name=OE9A051211T1;product=OE9A051211P1;Description=beta-glucosidase-like;Ontology_term=GO:0004553%2C GO:0005975
OE9A067165	561.395	-2.65856	0.319341	-8.32516	8.42128e-17	3.29639e-14	OE9A067165	ID=OE9A067165T1;Parent=OE9A067165;Name=OE9A067165T1;product=OE9A067165P1;Description=Serine threonine kinase;Ontology_term=GO:0004672%2C GO:0005524%2C GO:0006468
OE9A019029	202.883	-2.65844	0.502892	-5.2863	1.24818e-07	1.12418e-05	OE9A019029	ID=OE9A019029T1;Parent=OE9A019029;Name=OE9A019029T1;product=OE9A019029P1;Description=ethylene-responsive transcription factor ERF027;Ontology_term=GO:0003677%2C GO:0003700%2C GO:0005667%2C GO:0006355%2C GO:0045449
OE9A048333	13.5853	-2.65395	0.90927	-2.91877	0.00351415	0.0952878	OE9A048333	ID=OE9A048333T1;Parent=OE9A048333;Name=OE9A048333T1;product=OE9A048333P1
OE9A011881	51.6531	-2.63853	0.512019	-5.15318	2.56105e-07	2.14818e-05	OE9A011881	ID=OE9A011881T1;Parent=OE9A011881;Name=OE9A011881T1;product=OE9A011881P1;Description=pleiotropic drug resistance 1-like;Ontology_term=GO:0005524%2C GO:0005886%2C GO:0016021%2C GO:0042626%2C GO:0055085
OE9A120192	355.272	-2.63768	0.409309	-6.44422	1.16194e-10	1.79173e-08	OE9A120192	ID=OE9A120192T1;Parent=OE9A120192;Name=OE9A120192T1;product=OE9A120192P1
OE9A008644	34.5582	-2.63427	0.70941	-3.71332	0.000204557	0.00923897	OE9A008644	ID=OE9A008644T1;Parent=OE9A008644;Name=OE9A008644T1;product=OE9A008644P1;Description=cysteine ase inhibitor B-like;Ontology_term=GO:0004869%2C GO:0010951
OE9A025146	115.553	-2.62736	0.468771	-5.60478	2.0852e-08	2.22606e-06	OE9A025146	ID=OE9A025146T1;Parent=OE9A025146;Name=OE9A025146T1;product=OE9A025146P1;Description=mitogen-activated kinase 3;Ontology_term=GO:0000165%2C GO:0004707%2C GO:0005524%2C GO:0005622%2C GO:0007178%2C GO:0009069
OE9A047442	25.7152	-2.6089	0.854771	-3.05216	0.00227198	0.0687681	OE9A047442	ID=OE9A047442T1;Parent=OE9A047442;Name=OE9A047442T1;product=OE9A047442P1;Description=agamous-like MADS-box AGL8 homolog;Ontology_term=GO:0003677%2C GO:0003700%2C GO:0005634%2C GO:0005667%2C GO:0006355%2C GO:0010077%2C GO:0010154%2C GO:0045449%2C GO:0046983
OE9A104782	4531.31	-2.6068	0.400201	-6.51372	7.33122e-11	1.17192e-08	OE9A104782	ID=OE9A104782T1;Parent=OE9A104782;Name=OE9A104782T1;product=OE9A104782P1;Description=expansin-like A2;Ontology_term=GO:0005576%2C GO:0009505%2C GO:0009506%2C GO:0016020%2C GO:0019953
OE9A016113	28.9424	-2.59355	0.571149	-4.54094	5.60042e-06	0.00036304	OE9A016113	ID=OE9A016113T1;Parent=OE9A016113;Name=OE9A016113T1;product=OE9A016113P1;Description=poly polymerase;Ontology_term=GO:0005730
OE9A030371	45.4484	-2.59173	0.580359	-4.46573	7.97959e-06	0.000499003	OE9A030371	ID=OE9A030371T1;Parent=OE9A030371;Name=OE9A030371T1;product=OE9A030371P1;Description=calcium-binding CML19;Ontology_term=GO:0005509
OE9A085764	1332.32	-2.58727	0.316672	-8.17019	3.07913e-16	1.10602e-13	OE9A085764	ID=OE9A085764T1;Parent=OE9A085764;Name=OE9A085764T1;product=OE9A085764P1;Description=probable WRKY transcription factor 46;Ontology_term=GO:0003700%2C GO:0005667%2C GO:0006355%2C GO:0043565%2C GO:0045449
OE9A063822	1072.35	-2.57616	0.369784	-6.96666	3.24555e-12	6.19332e-10	OE9A063822	ID=OE9A063822T1;Parent=OE9A063822;Name=OE9A063822T1;product=OE9A063822P1;Description=CBL-interacting serine threonine- kinase 14-like;Ontology_term=GO:0004674%2C GO:0005524%2C GO:0006468%2C GO:0007165%2C GO:0009069
OE9A106281	81.1839	-2.57453	0.451232	-5.70555	1.15965e-08	1.28284e-06	OE9A106281	ID=OE9A106281T1;Parent=OE9A106281;Name=OE9A106281T1;product=OE9A106281P1;Description=Serine threonine kinase;Ontology_term=GO:0004672%2C GO:0005509%2C GO:0005515%2C GO:0005524%2C GO:0006468%2C GO:0030247
OE9A000364	65.9496	-2.57214	0.523648	-4.91196	9.01697e-07	6.89295e-05	OE9A000364	ID=OE9A000364T1;Parent=OE9A000364;Name=OE9A000364T1;product=OE9A000364P1;Description=lignin-forming anionic peroxidase;Ontology_term=GO:0004601%2C GO:0005576%2C GO:0006804%2C GO:0006979%2C GO:0020037%2C GO:0042744%2C GO:0046872%2C GO:0055114%2C GO:0098869
OE9A081767	305.657	-2.57075	0.337727	-7.61191	2.70073e-14	6.92929e-12	OE9A081767	ID=OE9A081767T1;Parent=OE9A081767;Name=OE9A081767T1;product=OE9A081767P1;Description=Beta-1,4-mannosyl-glyco 4-beta-N-acetylglucosaminyltransferase;Ontology_term=GO:0003830%2C GO:0006487%2C GO:0016021
OE9A059221	98.4125	-2.56821	0.55419	-4.63417	3.58381e-06	0.000243157	OE9A059221	ID=OE9A059221T1;Parent=OE9A059221;Name=OE9A059221T1;product=OE9A059221P1
OE9A105151	53.6999	-2.56744	0.860925	-2.98218	0.002862	0.081819	OE9A105151	ID=OE9A105151T1;Parent=OE9A105151;Name=OE9A105151T1;product=OE9A105151P1;Description=NIM1-INTERACTING 1-like;Ontology_term=GO:0010112
OE9A026208	538.181	-2.56511	0.503665	-5.09288	3.52668e-07	2.86374e-05	OE9A026208	ID=OE9A026208T1;Parent=OE9A026208;Name=OE9A026208T1;product=OE9A026208P1
OE9A107194	106.325	-2.56321	0.53226	-4.81572	1.46673e-06	0.000107806	OE9A107194	ID=OE9A107194T1;Parent=OE9A107194;Name=OE9A107194T1;product=OE9A107194P1
OE9A041403	135.55	-2.55845	0.42179	-6.0657	1.31379e-09	1.71422e-07	OE9A041403	ID=OE9A041403T1;Parent=OE9A041403;Name=OE9A041403T1;product=OE9A041403P1;Description=calmodulin-binding 60 C;Ontology_term=GO:0005516%2C GO:0006950%2C GO:0009617%2C GO:0050789
OE9A106276	23.9848	-2.55505	0.692826	-3.68786	0.000226149	0.0100947	OE9A106276	ID=OE9A106276T1;Parent=OE9A106276;Name=OE9A106276T1;product=OE9A106276P1;Description=, chromosomal-like;Ontology_term=GO:0005515%2C GO:0005524
OE9A026512	15.5552	-2.55303	0.808216	-3.15885	0.00158392	0.0515019	OE9A026512	ID=OE9A026512T1;Parent=OE9A026512;Name=OE9A026512T1;product=OE9A026512P1;Description=auxin-responsive SAUR50-like;Ontology_term=GO:0009733
OE9A107039	1327.49	-2.5444	0.344012	-7.39626	1.40077e-13	3.31538e-11	OE9A107039	ID=OE9A107039T1;Parent=OE9A107039;Name=OE9A107039T1;product=OE9A107039P1
OE9A052076	331.666	-2.53687	0.392365	-6.46559	1.00903e-10	1.56384e-08	OE9A052076	ID=OE9A052076T1;Parent=OE9A052076;Name=OE9A052076T1;product=OE9A052076P1;Description=syntaxin-121-like;Ontology_term=GO:0000149%2C GO:0005484%2C GO:0005886%2C GO:0006886%2C GO:0006887%2C GO:0006906%2C GO:0012505%2C GO:0016021%2C GO:0031201%2C GO:0048278
OE9A019561	866.782	-2.51676	0.23544	-10.6896	1.13841e-26	1.51121e-23	OE9A019561	ID=OE9A019561T1;Parent=OE9A019561;Name=OE9A019561T1;product=OE9A019561P1
OE9A021015	31.2235	-2.51269	0.577386	-4.35184	1.34999e-05	0.000794181	OE9A021015	ID=OE9A021015T1;Parent=OE9A021015;Name=OE9A021015T1;product=OE9A021015P1;Description=NRT1 PTR FAMILY -like;Ontology_term=GO:0005215%2C GO:0006810%2C GO:0016020
OE9A074891	1209.56	-2.50879	0.368157	-6.81447	9.46105e-12	1.73952e-09	OE9A074891	ID=OE9A074891T1;Parent=OE9A074891;Name=OE9A074891T1;product=OE9A074891P1;Description=CBL-interacting serine threonine- kinase 14-like;Ontology_term=GO:0004674%2C GO:0005524%2C GO:0006468%2C GO:0007165%2C GO:0009069
OE9A041553	462.253	-2.50478	0.321351	-7.79454	6.46451e-15	1.84462e-12	OE9A041553	ID=OE9A041553T1;Parent=OE9A041553;Name=OE9A041553T1;product=OE9A041553P1;Description=two-component response regulator ARR5-like;Ontology_term=GO:0000160%2C GO:0005622
OE9A088460	80.3316	-2.50146	0.584118	-4.28245	1.84848e-05	0.00106486	OE9A088460	ID=OE9A088460T1;Parent=OE9A088460;Name=OE9A088460T1;product=OE9A088460P1
OE9A120487	1021.19	-2.49052	0.298977	-8.33012	8.07579e-17	3.24273e-14	OE9A120487	ID=OE9A120487T1;Parent=OE9A120487;Name=OE9A120487T1;product=OE9A120487P1;Description=syntaxin-121-like;Ontology_term=GO:0000149%2C GO:0005484%2C GO:0005886%2C GO:0006886%2C GO:0006887%2C GO:0006906%2C GO:0012505%2C GO:0016021%2C GO:0031201%2C GO:0048278
OE9A043482	95.5586	-2.48507	0.412747	-6.02081	1.73544e-09	2.17158e-07	OE9A043482	ID=OE9A043482T1;Parent=OE9A043482;Name=OE9A043482T1;product=OE9A043482P1;Description=glutamyl-tRNA reductase 1, chloroplastic-like;Ontology_term=GO:0006782%2C GO:0008883%2C GO:0009507%2C GO:0015995%2C GO:0050661%2C GO:0055114
OE9A068770	247.796	-2.48123	0.244081	-10.1656	2.82305e-24	3.07833e-21	OE9A068770	ID=OE9A068770T1;Parent=OE9A068770;Name=OE9A068770T1;product=OE9A068770P1;Description=lipid phosphate phosphatase epsilon 2, chloroplastic-like;Ontology_term=GO:0006651%2C GO:0006687%2C GO:0008195%2C GO:0009395%2C GO:0009507%2C GO:0016020
OE9A098891	154.952	-2.47925	0.40602	-6.10623	1.02012e-09	1.34251e-07	OE9A098891	ID=OE9A098891T1;Parent=OE9A098891;Name=OE9A098891T1;product=OE9A098891P1
OE9A018426	117.855	-2.47736	0.422033	-5.87006	4.35629e-09	5.07657e-07	OE9A018426	ID=OE9A018426T1;Parent=OE9A018426;Name=OE9A018426T1;product=OE9A018426P1;Description=late embryogenesis abundant At1g64065;Ontology_term=GO:0016020
OE9A041966	231.098	-2.47572	0.377429	-6.55943	5.40132e-11	8.77197e-09	OE9A041966	ID=OE9A041966T1;Parent=OE9A041966;Name=OE9A041966T1;product=OE9A041966P1;Description=PLANT CADMIUM RESISTANCE 2-like;Ontology_term=GO:0016021
OE9A052433	20.4608	-2.46516	0.646795	-3.81134	0.000138216	0.00651237	OE9A052433	ID=OE9A052433T1;Parent=OE9A052433;Name=OE9A052433T1;product=OE9A052433P1;Description=receptor 12;Ontology_term=GO:0005515%2C GO:0016020
OE9A083942	47.3596	-2.46321	0.551607	-4.46552	7.98743e-06	0.000499003	OE9A083942	ID=OE9A083942T1;Parent=OE9A083942;Name=OE9A083942T1;product=OE9A083942P1;Description=ALA-interacting subunit 1-like;Ontology_term=GO:0016021
OE9A041210	24.1394	-2.4579	0.772734	-3.18078	0.00146879	0.0488308	OE9A041210	ID=OE9A041210T1;Parent=OE9A041210;Name=OE9A041210T1;product=OE9A041210P1;Description=uncharacterized N-acetyltransferase p20-like;Ontology_term=GO:0006474%2C GO:0008080%2C GO:0042967
OE9A014277	26.8153	-2.45477	0.773867	-3.17208	0.00151352	0.0496675	OE9A014277	ID=OE9A014277T1;Parent=OE9A014277;Name=OE9A014277T1;product=OE9A014277P1;Description=leucine-rich repeat receptor-like serine threonine tyrosine- kinase SOBIR1;Ontology_term=GO:0004672%2C GO:0005515%2C GO:0005524%2C GO:0006468%2C GO:0016020%2C GO:0048518
OE9A098086	307.794	-2.45277	0.416778	-5.88507	3.9789e-09	4.65455e-07	OE9A098086	ID=OE9A098086T1;Parent=OE9A098086;Name=OE9A098086T1;product=OE9A098086P1;Description=heavy metal-associated isoprenylated plant 3-like;Ontology_term=GO:0030001%2C GO:0046872
OE9A053282	238.33	-2.44792	0.454194	-5.38959	7.06201e-08	6.63437e-06	OE9A053282	ID=OE9A053282T1;Parent=OE9A053282;Name=OE9A053282T1;product=OE9A053282P1;Description=anthocyanidin 3-O-glucosyltransferase 2-like;Ontology_term=GO:0008152%2C GO:0016021%2C GO:0016758
OE9A081297	265.1	-2.4434	0.450706	-5.42127	5.91768e-08	5.61114e-06	OE9A081297	ID=OE9A081297T1;Parent=OE9A081297;Name=OE9A081297T1;product=OE9A081297P1
OE9A082501	666.834	-2.43949	0.296465	-8.22857	1.89455e-16	6.96919e-14	OE9A082501	ID=OE9A082501T1;Parent=OE9A082501;Name=OE9A082501T1;product=OE9A082501P1
OE9A011034	1098.54	-2.43905	0.304873	-8.00021	1.24207e-15	4.07772e-13	OE9A011034	ID=OE9A011034T1;Parent=OE9A011034;Name=OE9A011034T1;product=OE9A011034P1
OE9A078448	47.1346	-2.43797	0.522217	-4.6685	3.03412e-06	0.000209173	OE9A078448	ID=OE9A078448T1;Parent=OE9A078448;Name=OE9A078448T1;product=OE9A078448P1;Description=GATA transcription factor 8-like;Ontology_term=GO:0000785%2C GO:0000977%2C GO:0001085%2C GO:0001228%2C GO:0003682%2C GO:0005634%2C GO:0005667%2C GO:0008270%2C GO:0030154%2C GO:0045893
OE9A038526	532.454	-2.42281	0.423812	-5.71672	1.086e-08	1.20574e-06	OE9A038526	ID=OE9A038526T1;Parent=OE9A038526;Name=OE9A038526T1;product=OE9A038526P1
OE9A014923	3709.05	-2.41722	0.342771	-7.05198	1.76386e-12	3.51988e-10	OE9A014923	ID=OE9A014923T1;Parent=OE9A014923;Name=OE9A014923T1;product=OE9A014923P1;Description=RING-H2 finger ATL2-like;Ontology_term=GO:0005515%2C GO:0008270%2C GO:0016020
OE9A010507	22.6759	-2.41624	0.730995	-3.30541	0.000948385	0.0336863	OE9A010507	ID=OE9A010507T1;Parent=OE9A010507;Name=OE9A010507T1;product=OE9A010507P1;Description=Serine threonine kinase;Ontology_term=GO:0004672%2C GO:0005524%2C GO:0006468
OE9A043744	54.6573	-2.4117	0.528178	-4.56607	4.96945e-06	0.000326295	OE9A043744	ID=OE9A043744T4;Parent=OE9A043744;Name=OE9A043744T4;product=OE9A043744P1
OE9A045411	650.116	-2.40261	0.287625	-8.35327	6.64006e-17	2.70312e-14	OE9A045411	ID=OE9A045411T1;Parent=OE9A045411;Name=OE9A045411T1;product=OE9A045411P1
OE9A079404	212.409	-2.39943	0.465937	-5.14968	2.60925e-07	2.18262e-05	OE9A079404	ID=OE9A079404T1;Parent=OE9A079404;Name=OE9A079404T1;product=OE9A079404P1;Description=mitogen-activated kinase kinase kinase 3-like;Ontology_term=GO:0004672%2C GO:0005524%2C GO:0006468
OE9A024490	18.7263	-2.39691	0.707029	-3.39011	0.000698648	0.0262699	OE9A024490	ID=OE9A024490T1;Parent=OE9A024490;Name=OE9A024490T1;product=OE9A024490P1;Description=auxin-responsive SAUR72;Ontology_term=GO:0009733
OE9A100613	511.653	-2.39491	0.355038	-6.74552	1.52483e-11	2.6911e-09	OE9A100613	ID=OE9A100613T1;Parent=OE9A100613;Name=OE9A100613T1;product=OE9A100613P1;Description=U-box domain-containing 4-like;Ontology_term=GO:0005515%2C GO:0005634%2C GO:0005737
OE9A101290	220.886	-2.39161	0.45346	-5.27414	1.33377e-07	1.19072e-05	OE9A101290	ID=OE9A101290T1;Parent=OE9A101290;Name=OE9A101290T1;product=OE9A101290P1;Description=high mobility group B 1-like;Ontology_term=GO:0005982%2C GO:0005985%2C GO:0006011%2C GO:0016020%2C GO:0016760%2C GO:0030244
OE9A071875	55.5518	-2.38365	0.555966	-4.2874	1.80778e-05	0.00104536	OE9A071875	ID=OE9A071875T1;Parent=OE9A071875;Name=OE9A071875T1;product=OE9A071875P1;Description=O-fucosyltransferase 19-like;Ontology_term=GO:0016021
OE9A109323	110.899	-2.37801	0.663595	-3.58353	0.000338976	0.0143944	OE9A109323	ID=OE9A109323T1;Parent=OE9A109323;Name=OE9A109323T1;product=OE9A109323P1;Description=Serine threonine kinase;Ontology_term=GO:0004674%2C GO:0005509%2C GO:0005515%2C GO:0005524%2C GO:0006468%2C GO:0009069%2C GO:0016021%2C GO:0030247
OE9A058819	228.404	-2.37265	0.564932	-4.19989	2.67041e-05	0.00148512	OE9A058819	ID=OE9A058819T1;Parent=OE9A058819;Name=OE9A058819T1;product=OE9A058819P1;Description=AAA-ATPase ASD, mitochondrial-like;Ontology_term=GO:0005524%2C GO:0016021
OE9A119978	10805.4	-2.37262	0.258799	-9.16783	4.82634e-20	3.27462e-17	OE9A119978	ID=OE9A119978T1;Parent=OE9A119978;Name=OE9A119978T1;product=OE9A119978P1;Description=ethylene-responsive transcription factor 5-like;Ontology_term=GO:0003677%2C GO:0003700%2C GO:0005667%2C GO:0006355%2C GO:0045449
OE9A030138	323.477	-2.36598	0.394218	-6.00171	1.95254e-09	2.3751e-07	OE9A030138	ID=OE9A030138T1;Parent=OE9A030138;Name=OE9A030138T1;product=OE9A030138P1;Description=5 -adenylylsulfate reductase 3, chloroplastic-like;Ontology_term=GO:0005623%2C GO:0016671%2C GO:0019419%2C GO:0045454
OE9A053656	45.7977	-2.36528	0.45377	-5.2125	1.86316e-07	1.61259e-05	OE9A053656	ID=OE9A053656T2;Parent=OE9A053656;Name=OE9A053656T2;product=OE9A053656P2;Description=;Ontology_term=GO:0003824%2C GO:0005992
OE9A085702	225.4	-2.3647	0.328361	-7.20153	5.95414e-13	1.31733e-10	OE9A085702	ID=OE9A085702T1;Parent=OE9A085702;Name=OE9A085702T1;product=OE9A085702P1;Description=receptor 12;Ontology_term=GO:0005515%2C GO:0016020
OE9A084516	886.58	-2.36205	0.431414	-5.47514	4.37178e-08	4.26963e-06	OE9A084516	ID=OE9A084516T1;Parent=OE9A084516;Name=OE9A084516T1;product=OE9A084516P1;Description=UDP-glucuronate 4-epimerase 6;Ontology_term=GO:0005768%2C GO:0005802%2C GO:0005975%2C GO:0016021%2C GO:0016857%2C GO:0050662
OE9A016521	344.11	-2.35372	0.38446	-6.12215	9.23183e-10	1.23086e-07	OE9A016521	ID=OE9A016521T1;Parent=OE9A016521;Name=OE9A016521T1;product=OE9A016521P1;Description=5 -adenylylsulfate reductase 3, chloroplastic-like;Ontology_term=GO:0005623%2C GO:0016671%2C GO:0019419%2C GO:0045454
OE9A092592	99.4335	-2.35198	0.451018	-5.21482	1.83992e-07	1.60047e-05	OE9A092592	ID=OE9A092592T1;Parent=OE9A092592;Name=OE9A092592T1;product=OE9A092592P1;Description=PB1 domain-containing;Ontology_term=GO:0005515
OE9A112887	34.8111	-2.35145	0.581967	-4.04051	5.33343e-05	0.00282219	OE9A112887	ID=OE9A112887T1;Parent=OE9A112887;Name=OE9A112887T1;product=OE9A112887P1;Description=G-type lectin S-receptor-like serine threonine- kinase At4g27290 isoform X1;Ontology_term=GO:0004672%2C GO:0005524%2C GO:0006468%2C GO:0016020
OE9A067990	149.184	-2.34609	0.422467	-5.55331	2.80307e-08	2.88159e-06	OE9A067990	ID=OE9A067990T1;Parent=OE9A067990;Name=OE9A067990T1;product=OE9A067990P1;Description=uncharacterized protein LOC111404955;Ontology_term=GO:0016021
OE9A088503	24.5947	-2.33941	0.680848	-3.43602	0.000590337	0.0229607	OE9A088503	ID=OE9A088503T1;Parent=OE9A088503;Name=OE9A088503T1;product=OE9A088503P1
OE9A010897	74.454	-2.33586	0.51485	-4.53697	5.70685e-06	0.000367598	OE9A010897	ID=OE9A010897T1;Parent=OE9A010897;Name=OE9A010897T1;product=OE9A010897P1;Description=NDR1 HIN1 13;Ontology_term=GO:0016020
OE9A043154	8567.38	-2.32744	0.301449	-7.72085	1.15552e-14	3.17841e-12	OE9A043154	ID=OE9A043154T1;Parent=OE9A043154;Name=OE9A043154T1;product=OE9A043154P1;Description=zinc finger CCCH domain-containing 29-like;Ontology_term=GO:0005515%2C GO:0046872
OE9A105623	199.347	-2.32551	0.41225	-5.64103	1.69036e-08	1.82368e-06	OE9A105623	ID=OE9A105623T1;Parent=OE9A105623;Name=OE9A105623T1;product=OE9A105623P1;Description=probable CCR4-associated factor 1 homolog 11;Ontology_term=GO:0000175%2C GO:0000288%2C GO:0003676%2C GO:0005634%2C GO:0030014%2C GO:0051252
OE9A068356	36.2856	-2.32191	0.651651	-3.56312	0.000366475	0.0152411	OE9A068356	ID=OE9A068356T1;Parent=OE9A068356;Name=OE9A068356T1;product=OE9A068356P1
OE9A076402	436.488	-2.32002	0.32428	-7.15437	8.40604e-13	1.74594e-10	OE9A076402	ID=OE9A076402T1;Parent=OE9A076402;Name=OE9A076402T1;product=OE9A076402P1;Description=BTB POZ domain-containing At5g41330-like;Ontology_term=GO:0005515%2C GO:0051260
OE9A026649	52.243	-2.31806	0.481575	-4.8135	1.48312e-06	0.000108592	OE9A026649	ID=OE9A026649T1;Parent=OE9A026649;Name=OE9A026649T1;product=OE9A026649P1;Description=UDP-galactose UDP-glucose transporter 2-like;Ontology_term=GO:0008643%2C GO:0030173%2C GO:0030176%2C GO:0046964%2C GO:1902559
OE9A003051	7074.57	-2.31692	0.308977	-7.49868	6.44658e-14	1.58731e-11	OE9A003051	ID=OE9A003051T1;Parent=OE9A003051;Name=OE9A003051T1;product=OE9A003051P1
OE9A061517	201.587	-2.31576	0.340573	-6.79959	1.04919e-11	1.86243e-09	OE9A061517	ID=OE9A061517T1;Parent=OE9A061517;Name=OE9A061517T1;product=OE9A061517P1;Description=LEAF RUST 10 DISEASE-RESISTANCE LOCUS RECEPTOR-LIKE PROTEIN KINASE-like;Ontology_term=GO:0004672%2C GO:0005524%2C GO:0006468
OE9A000795	21.5337	-2.30143	0.718856	-3.20152	0.00136703	0.0459166	OE9A000795	ID=OE9A000795T1;Parent=OE9A000795;Name=OE9A000795T1;product=OE9A000795P1;Description=GATA transcription factor 8-like;Ontology_term=GO:0000785%2C GO:0000977%2C GO:0001085%2C GO:0001228%2C GO:0003682%2C GO:0005634%2C GO:0005667%2C GO:0008270%2C GO:0030154%2C GO:0045893
OE9A115996	435.727	-2.30018	0.371453	-6.19238	5.92615e-10	8.22442e-08	OE9A115996	ID=OE9A115996T1;Parent=OE9A115996;Name=OE9A115996T1;product=OE9A115996P1
OE9A105581	306.741	-2.29931	0.394625	-5.82656	5.65815e-09	6.51904e-07	OE9A105581	ID=OE9A105581T1;Parent=OE9A105581;Name=OE9A105581T1;product=OE9A105581P1;Description=dehydration-responsive element-binding 1E-like;Ontology_term=GO:0003677%2C GO:0003700%2C GO:0005634%2C GO:0005667%2C GO:0006355%2C GO:0045449
OE9A117718	359.494	-2.29547	0.291238	-7.88176	3.22797e-15	9.9552e-13	OE9A117718	ID=OE9A117718T1;Parent=OE9A117718;Name=OE9A117718T1;product=OE9A117718P1;Description=poly polymerase;Ontology_term=GO:0005730
OE9A116623	58.67	-2.29302	0.762484	-3.0073	0.00263579	0.0768633	OE9A116623	ID=OE9A116623T1;Parent=OE9A116623;Name=OE9A116623T1;product=OE9A116623P1;Description=7-deoxyloganetic acid UDP-glucosyltransferase;Ontology_term=GO:0035251%2C GO:1900994
OE9A047145	1975.95	-2.2922	0.235274	-9.74271	1.98205e-22	1.681e-19	OE9A047145	ID=OE9A047145T1;Parent=OE9A047145;Name=OE9A047145T1;product=OE9A047145P1
OE9A010223	340.979	-2.28831	0.441607	-5.18177	2.19792e-07	1.8745e-05	OE9A010223	ID=OE9A010223T1;Parent=OE9A010223;Name=OE9A010223T1;product=OE9A010223P1
OE9A086851	774.522	-2.28158	0.288706	-7.90279	2.72736e-15	8.49713e-13	OE9A086851	ID=OE9A086851T1;Parent=OE9A086851;Name=OE9A086851T1;product=OE9A086851P1
OE9A095378	757.492	-2.27952	0.696147	-3.27448	0.00105855	0.0370639	OE9A095378	ID=OE9A095378T1;Parent=OE9A095378;Name=OE9A095378T1;product=OE9A095378P1;Description=ethylene-responsive transcription factor ERF017-like;Ontology_term=GO:0003677%2C GO:0003700%2C GO:0005667%2C GO:0006355%2C GO:0045449
OE9A087360	1983.74	-2.27851	0.323749	-7.0379	1.95163e-12	3.84434e-10	OE9A087360	ID=OE9A087360T1;Parent=OE9A087360;Name=OE9A087360T1;product=OE9A087360P1;Description=glucan endo-1,3-beta-glucosidase-like;Ontology_term=GO:0004553%2C GO:0005975
OE9A050550	724.397	-2.27568	0.303118	-7.50756	6.02401e-14	1.50758e-11	OE9A050550	ID=OE9A050550T1;Parent=OE9A050550;Name=OE9A050550T1;product=OE9A050550P1;Description=beta-1,4-mannosyl-glyco 4-beta-N-acetylglucosaminyltransferase-like;Ontology_term=GO:0003830%2C GO:0006487%2C GO:0016021
OE9A013077	503.186	-2.27359	0.391446	-5.80819	6.31522e-09	7.24873e-07	OE9A013077	ID=OE9A013077T1;Parent=OE9A013077;Name=OE9A013077T1;product=OE9A013077P1;Description=ankyrin repeat-containing BDA1-like;Ontology_term=GO:0005515%2C GO:0016021
OE9A084477	66.6109	-2.27315	0.565034	-4.02303	5.7454e-05	0.00301925	OE9A084477	ID=OE9A084477T1;Parent=OE9A084477;Name=OE9A084477T1;product=OE9A084477P1;Description=receptor kinase THESEUS 1;Ontology_term=GO:0004674%2C GO:0005524%2C GO:0006468%2C GO:0009069%2C GO:0016021
OE9A095005	74.921	-2.27271	0.430306	-5.28162	1.28045e-07	1.14985e-05	OE9A095005	ID=OE9A095005T1;Parent=OE9A095005;Name=OE9A095005T1;product=OE9A095005P1;Description=late embryogenesis abundant At1g64065-like;Ontology_term=GO:0016020
OE9A046118	63.4891	-2.27104	0.684065	-3.31992	0.000900425	0.0323433	OE9A046118	ID=OE9A046118T1;Parent=OE9A046118;Name=OE9A046118T1;product=OE9A046118P1;Description=RNA-binding 38;Ontology_term=GO:0000166%2C GO:0003676
OE9A031171	182.311	-2.26904	0.415099	-5.46627	4.59603e-08	4.46898e-06	OE9A031171	ID=OE9A031171T1;Parent=OE9A031171;Name=OE9A031171T1;product=OE9A031171P1;Description=desiccation protectant Lea14 homolog;Ontology_term=GO:0009269
OE9A060709	146.786	-2.26745	0.444898	-5.09655	3.459e-07	2.83899e-05	OE9A060709	ID=OE9A060709T1;Parent=OE9A060709;Name=OE9A060709T1;product=OE9A060709P1
OE9A046042	226.933	-2.26643	0.343136	-6.60503	3.97425e-11	6.59466e-09	OE9A046042	ID=OE9A046042T1;Parent=OE9A046042;Name=OE9A046042T1;product=OE9A046042P1;Description=ethylene-responsive transcription factor ERF027-like;Ontology_term=GO:0003677%2C GO:0003700%2C GO:0005667%2C GO:0006355%2C GO:0045449
OE9A021431	12486.4	-2.26107	0.266582	-8.48171	2.21912e-17	9.54886e-15	OE9A021431	ID=OE9A021431T1;Parent=OE9A021431;Name=OE9A021431T1;product=OE9A021431P1;Description=zinc finger CCCH domain-containing 29-like;Ontology_term=GO:0005515%2C GO:0046872
OE9A024506	218.145	-2.25876	0.328086	-6.88465	5.79296e-12	1.0851e-09	OE9A024506	ID=OE9A024506T1;Parent=OE9A024506;Name=OE9A024506T1;product=OE9A024506P1;Description=probable inorganic phosphate transporter 1-9;Ontology_term=GO:0016021%2C GO:0022857%2C GO:0055085
OE9A106589	364.008	-2.25752	0.236227	-9.55656	1.21741e-21	9.53077e-19	OE9A106589	ID=OE9A106589T1;Parent=OE9A106589;Name=OE9A106589T1;product=OE9A106589P1
OE9A110260	82.387	-2.25723	0.380779	-5.92792	3.0679e-09	3.65677e-07	OE9A110260	ID=OE9A110260T1;Parent=OE9A110260;Name=OE9A110260T1;product=OE9A110260P1
OE9A054533	12.1239	-2.25708	0.749381	-3.01192	0.00259599	0.075993	OE9A054533	ID=OE9A054533T1;Parent=OE9A054533;Name=OE9A054533T1;product=OE9A054533P1;Description=probable ribose-5-phosphate isomerase 2;Ontology_term=GO:0004751%2C GO:0009052%2C GO:0015976
OE9A064776	86.4523	-2.25438	0.605703	-3.72193	0.00019771	0.00894292	OE9A064776	ID=OE9A064776T1;Parent=OE9A064776;Name=OE9A064776T1;product=OE9A064776P1
OE9A039709	56.902	-2.25283	0.498583	-4.51846	6.22905e-06	0.000397878	OE9A039709	ID=OE9A039709T1;Parent=OE9A039709;Name=OE9A039709T1;product=OE9A039709P1;Description=probable phosphatase 2C 49;Ontology_term=GO:0004722%2C GO:0006470%2C GO:0008287%2C GO:0046872
OE9A008801	1838.63	-2.25276	0.286585	-7.8607	3.82001e-15	1.16187e-12	OE9A008801	ID=OE9A008801T1;Parent=OE9A008801;Name=OE9A008801T1;product=OE9A008801P1;Description=E3 ubiquitin- ligase RING1-like;Ontology_term=GO:0005515%2C GO:0008270
OE9A003203	19.4232	-2.25099	0.572088	-3.9347	8.33013e-05	0.00417628	OE9A003203	ID=OE9A003203T1;Parent=OE9A003203;Name=OE9A003203T1;product=OE9A003203P1;Description=calcium uniporter 5, mitochondrial-like;Ontology_term=GO:0006810%2C GO:0015292%2C GO:0016021
OE9A112876	54.0184	-2.25094	0.599018	-3.75771	0.000171472	0.00787278	OE9A112876	ID=OE9A112876T1;Parent=OE9A112876;Name=OE9A112876T1;product=OE9A112876P1;Description=chitinase 10;Ontology_term=GO:0004568%2C GO:0005975%2C GO:0006032%2C GO:0016021%2C GO:0016998
OE9A082259	10.5682	-2.24866	0.77491	-2.90183	0.0037099	0.0993589	OE9A082259	ID=OE9A082259T1;Parent=OE9A082259;Name=OE9A082259T1;product=OE9A082259P1
OE9A055755	50.9105	-2.24726	0.717949	-3.13012	0.00174737	0.0559818	OE9A055755	ID=OE9A055755T1;Parent=OE9A055755;Name=OE9A055755T1;product=OE9A055755P1
OE9A036088	52.8618	-2.24461	0.729098	-3.07861	0.00207968	0.0643332	OE9A036088	ID=OE9A036088T1;Parent=OE9A036088;Name=OE9A036088T1;product=OE9A036088P1;Description=polygalacturonase inhibitor-like;Ontology_term=GO:0005515
OE9A056077	118.46	-2.23659	0.511144	-4.37565	1.21069e-05	0.000727652	OE9A056077	ID=OE9A056077T1;Parent=OE9A056077;Name=OE9A056077T1;product=OE9A056077P1
OE9A006276	4605.85	-2.22343	0.367734	-6.04632	1.48191e-09	1.89312e-07	OE9A006276	ID=OE9A006276T1;Parent=OE9A006276;Name=OE9A006276T1;product=OE9A006276P1;Description=calcium-binding CML42;Ontology_term=GO:0005509
OE9A011505	1620.87	-2.22328	0.369024	-6.02474	1.69377e-09	2.12815e-07	OE9A011505	ID=OE9A011505T1;Parent=OE9A011505;Name=OE9A011505T1;product=OE9A011505P1
OE9A046673	175.463	-2.22224	0.467988	-4.74851	2.04922e-06	0.000145504	OE9A046673	ID=OE9A046673T1;Parent=OE9A046673;Name=OE9A046673T1;product=OE9A046673P1
OE9A031595	24.8517	-2.21726	0.669307	-3.31278	0.000923746	0.0330196	OE9A031595	ID=OE9A031595T1;Parent=OE9A031595;Name=OE9A031595T1;product=OE9A031595P1;Description=GATA transcription factor 8-like;Ontology_term=GO:0000785%2C GO:0000977%2C GO:0001085%2C GO:0001228%2C GO:0003682%2C GO:0005634%2C GO:0005667%2C GO:0008270%2C GO:0030154%2C GO:0045893
OE9A051907	14.5722	-2.21648	0.719664	-3.07988	0.00207086	0.0642498	OE9A051907	ID=OE9A051907T1;Parent=OE9A051907;Name=OE9A051907T1;product=OE9A051907P1;Description=UDP-glucose:glyco glucosyltransferase isoform X1;Ontology_term=GO:0003980%2C GO:0006486%2C GO:0097359
OE9A083330	176.535	-2.21464	0.338829	-6.53616	6.31191e-11	1.01429e-08	OE9A083330	ID=OE9A083330T1;Parent=OE9A083330;Name=OE9A083330T1;product=OE9A083330P1;Description=auxin-responsive SAUR32-like;Ontology_term=GO:0009733
OE9A075065	4561.1	-2.21289	0.307583	-7.19444	6.27165e-13	1.3776e-10	OE9A075065	ID=OE9A075065T1;Parent=OE9A075065;Name=OE9A075065T1;product=OE9A075065P1;Description=SRC2 homolog, partial;Ontology_term=GO:0005515
OE9A038471	166.687	-2.21284	0.453072	-4.88407	1.03916e-06	7.85335e-05	OE9A038471	ID=OE9A038471T1;Parent=OE9A038471;Name=OE9A038471T1;product=OE9A038471P1;Description=ankyrin repeat-containing BDA1-like;Ontology_term=GO:0005515
OE9A110374	107.771	-2.21113	0.360503	-6.13345	8.59951e-10	1.15665e-07	OE9A110374	ID=OE9A110374T1;Parent=OE9A110374;Name=OE9A110374T1;product=OE9A110374P1;Description=GDSL esterase lipase At5g55050-like;Ontology_term=GO:0016788
OE9A026802	136.387	-2.20964	0.366412	-6.03047	1.63479e-09	2.07973e-07	OE9A026802	ID=OE9A026802T1;Parent=OE9A026802;Name=OE9A026802T1;product=OE9A026802P1
OE9A039396	557.347	-2.2038	0.453868	-4.8556	1.20022e-06	8.98166e-05	OE9A039396	ID=OE9A039396T1;Parent=OE9A039396;Name=OE9A039396T1;product=OE9A039396P1;Description=mitochondrial uncoupling 5-like;Ontology_term=GO:0003735%2C GO:0005840%2C GO:0006412%2C GO:0006839%2C GO:0016021%2C GO:0031966%2C GO:0042254
OE9A012474	673.039	-2.19953	0.292805	-7.51191	5.82695e-14	1.47032e-11	OE9A012474	ID=OE9A012474T1;Parent=OE9A012474;Name=OE9A012474T1;product=OE9A012474P1;Description=uncharacterized protein LOC111411035;Ontology_term=GO:0005515
OE9A026617	206.794	-2.18222	0.478276	-4.56268	5.05039e-06	0.000330074	OE9A026617	ID=OE9A026617T1;Parent=OE9A026617;Name=OE9A026617T1;product=OE9A026617P1
OE9A057874	236.434	-2.1761	0.3409	-6.3834	1.73195e-10	2.53015e-08	OE9A057874	ID=OE9A057874T1;Parent=OE9A057874;Name=OE9A057874T1;product=OE9A057874P1;Description=SRC2-like;Ontology_term=GO:0005515
OE9A087760	1007.58	-2.17343	0.291004	-7.46874	8.09642e-14	1.9619e-11	OE9A087760	ID=OE9A087760T1;Parent=OE9A087760;Name=OE9A087760T1;product=OE9A087760P1;Description=berberine bridge enzyme-like 21;Ontology_term=GO:0016614%2C GO:0050660%2C GO:0055114
OE9A097447	173.287	-2.16973	0.38193	-5.68096	1.33945e-08	1.4658e-06	OE9A097447	ID=OE9A097447T1;Parent=OE9A097447;Name=OE9A097447T1;product=OE9A097447P1;Description=phosphoglycerate mutase AT74H;Ontology_term=GO:0005829%2C GO:0015976%2C GO:0016311%2C GO:0050278
OE9A098481	299.146	-2.16824	0.381543	-5.68283	1.32485e-08	1.45505e-06	OE9A098481	ID=OE9A098481T1;Parent=OE9A098481;Name=OE9A098481T1;product=OE9A098481P1;Description=probable glutathione S-transferase;Ontology_term=GO:0004364%2C GO:0005515%2C GO:0005737%2C GO:0006749%2C GO:0006803%2C GO:0009407
OE9A043543	39.6169	-2.16811	0.642207	-3.37603	0.000735394	0.0274152	OE9A043543	ID=OE9A043543T1;Parent=OE9A043543;Name=OE9A043543T1;product=OE9A043543P1;Description=LEAF RUST 10 DISEASE-RESISTANCE LOCUS RECEPTOR-LIKE PROTEIN KINASE-like;Ontology_term=GO:0004672%2C GO:0005524%2C GO:0006468
OE9A022570	11.2567	-2.16707	0.662415	-3.27147	0.00106988	0.0373327	OE9A022570	ID=OE9A022570T1;Parent=OE9A022570;Name=OE9A022570T1;product=OE9A022570P1;Description=ATP sulfurylase 1, chloroplastic-like;Ontology_term=GO:0000103%2C GO:0004781%2C GO:0006144
OE9A022893	318.328	-2.16382	0.431136	-5.01889	5.19701e-07	4.13216e-05	OE9A022893	ID=OE9A022893T1;Parent=OE9A022893;Name=OE9A022893T1;product=OE9A022893P1;Description=NRT1 PTR FAMILY -like;Ontology_term=GO:0005215%2C GO:0006810%2C GO:0016020
OE9A022053	159.876	-2.16153	0.574485	-3.76255	0.000168192	0.00773378	OE9A022053	ID=OE9A022053T1;Parent=OE9A022053;Name=OE9A022053T1;product=OE9A022053P1;Description=LEAF RUST 10 DISEASE-RESISTANCE LOCUS RECEPTOR-LIKE PROTEIN KINASE-like;Ontology_term=GO:0004672%2C GO:0005524%2C GO:0006468%2C GO:0030247
OE9A057304	103.253	-2.15806	0.423649	-5.09398	3.50617e-07	2.85467e-05	OE9A057304	ID=OE9A057304T1;Parent=OE9A057304;Name=OE9A057304T1;product=OE9A057304P1;Description=diacylglycerol kinase theta-like;Ontology_term=GO:0035556
OE9A022845	291.099	-2.15538	0.407008	-5.29567	1.1858e-07	1.08075e-05	OE9A022845	ID=OE9A022845T1;Parent=OE9A022845;Name=OE9A022845T1;product=OE9A022845P1
OE9A071166	741.822	-2.15286	0.306553	-7.0228	2.17468e-12	4.25625e-10	OE9A071166	ID=OE9A071166T1;Parent=OE9A071166;Name=OE9A071166T1;product=OE9A071166P1;Description=RING-H2 finger ATL52-like;Ontology_term=GO:0004842%2C GO:0005515%2C GO:0008270%2C GO:0016020%2C GO:0016567
OE9A022593	396.744	-2.145	0.717083	-2.99128	0.00277813	0.0800205	OE9A022593	ID=OE9A022593T1;Parent=OE9A022593;Name=OE9A022593T1;product=OE9A022593P1
OE9A042937	10852.8	-2.14119	0.277394	-7.71896	1.17286e-14	3.19729e-12	OE9A042937	ID=OE9A042937T1;Parent=OE9A042937;Name=OE9A042937T1;product=OE9A042937P1;Description=zinc finger CCCH domain-containing 29-like;Ontology_term=GO:0005515%2C GO:0046872
OE9A038510	89.4533	-2.14076	0.507918	-4.21477	2.50037e-05	0.00139564	OE9A038510	ID=OE9A038510T1;Parent=OE9A038510;Name=OE9A038510T1;product=OE9A038510P1;Description=allene oxide synthase 1, chloroplastic-like;Ontology_term=GO:0004497%2C GO:0005506%2C GO:0016705%2C GO:0020037%2C GO:0047987%2C GO:0055114
OE9A082565	48.7244	-2.1383	0.592754	-3.60741	0.000309275	0.013281	OE9A082565	ID=OE9A082565T1;Parent=OE9A082565;Name=OE9A082565T1;product=OE9A082565P1;Description=phosphatase family;Ontology_term=GO:0008152%2C GO:0016787
OE9A022966	60.5179	-2.13748	0.626054	-3.4142	0.000639685	0.0244265	OE9A022966	ID=OE9A022966T1;Parent=OE9A022966;Name=OE9A022966T1;product=OE9A022966P1;Description=GATA transcription factor 8-like;Ontology_term=GO:0000785%2C GO:0000977%2C GO:0001085%2C GO:0001228%2C GO:0003682%2C GO:0005634%2C GO:0005667%2C GO:0008270%2C GO:0030154%2C GO:0045893
OE9A048147	3253.89	-2.13609	0.269994	-7.91163	2.5405e-15	7.99656e-13	OE9A048147	ID=OE9A048147T1;Parent=OE9A048147;Name=OE9A048147T1;product=OE9A048147P1;Description=probable phosphatase 2C 25;Ontology_term=GO:0004722%2C GO:0006470%2C GO:0008287%2C GO:0046872
OE9A115035	1313.69	-2.13453	0.409512	-5.21237	1.86442e-07	1.61259e-05	OE9A115035	ID=OE9A115035T1;Parent=OE9A115035;Name=OE9A115035T1;product=OE9A115035P1;Description=bZIP transcription factor 11-like;Ontology_term=GO:0003700%2C GO:0005667%2C GO:0006355%2C GO:0043565%2C GO:0045449
OE9A063618	25.0682	-2.12706	0.670024	-3.1746	0.00150042	0.0493118	OE9A063618	ID=OE9A063618T1;Parent=OE9A063618;Name=OE9A063618T1;product=OE9A063618P1;Description=poly(U)-specific endoribonuclease-B-like;Ontology_term=GO:0016788
OE9A113001	173.776	-2.12274	0.35703	-5.94555	2.75534e-09	3.31205e-07	OE9A113001	ID=OE9A113001T1;Parent=OE9A113001;Name=OE9A113001T1;product=OE9A113001P1;Description=transcription factor MYB44-like;Ontology_term=GO:0003677
OE9A015899	22.7167	-2.11936	0.667216	-3.17643	0.001491	0.0490553	OE9A015899	ID=OE9A015899T1;Parent=OE9A015899;Name=OE9A015899T1;product=OE9A015899P1;Description=Leucine-rich repeat;Ontology_term=GO:0005515%2C GO:0008152%2C GO:0016301
OE9A104625	57.8943	-2.11482	0.461632	-4.58118	4.62355e-06	0.000306217	OE9A104625	ID=OE9A104625T2;Parent=OE9A104625;Name=OE9A104625T2;product=OE9A104625P2;Description=PB1 domain-containing;Ontology_term=GO:0005515
OE9A103895	417.429	-2.11171	0.333959	-6.32327	2.56086e-10	3.68813e-08	OE9A103895	ID=OE9A103895T1;Parent=OE9A103895;Name=OE9A103895T1;product=OE9A103895P1;Description=rust resistance kinase Lr10-like;Ontology_term=GO:0004672%2C GO:0005524%2C GO:0006468
OE9A019866	213.075	-2.11164	0.458378	-4.60677	4.0898e-06	0.000274439	OE9A019866	ID=OE9A019866T1;Parent=OE9A019866;Name=OE9A019866T1;product=OE9A019866P1;Description=calcium-transporting ATPase 2, plasma membrane-type;Ontology_term=GO:0005388%2C GO:0005516%2C GO:0005524%2C GO:0016021%2C GO:0016529%2C GO:0046872%2C GO:0070588
OE9A009435	655.078	-2.11154	0.445037	-4.74464	2.08876e-06	0.000147967	OE9A009435	ID=OE9A009435T1;Parent=OE9A009435;Name=OE9A009435T1;product=OE9A009435P1;Description=auxin-responsive SAUR36-like;Ontology_term=GO:0009733
OE9A046985	77.8798	-2.10996	0.534119	-3.95036	7.80342e-05	0.00395771	OE9A046985	ID=OE9A046985T1;Parent=OE9A046985;Name=OE9A046985T1;product=OE9A046985P1;Description=phosphate metabolism 8;Ontology_term=GO:0008152%2C GO:0016787
OE9A088849	926.975	-2.10724	0.287306	-7.33445	2.22632e-13	5.14955e-11	OE9A088849	ID=OE9A088849T1;Parent=OE9A088849;Name=OE9A088849T1;product=OE9A088849P1
OE9A103591	234.456	-2.10681	0.465438	-4.52652	5.99642e-06	0.000383821	OE9A103591	ID=OE9A103591T1;Parent=OE9A103591;Name=OE9A103591T1;product=OE9A103591P1;Description=Copper chaperone;Ontology_term=GO:0030001%2C GO:0046872
OE9A034538	19959.5	-2.10141	0.297858	-7.05507	1.72508e-12	3.46513e-10	OE9A034538	ID=OE9A034538T1;Parent=OE9A034538;Name=OE9A034538T1;product=OE9A034538P1;Description=nematode resistance -like HSPRO2;Ontology_term=GO:0006952
OE9A061692	430.11	-2.10125	0.291491	-7.20863	5.6519e-13	1.25959e-10	OE9A061692	ID=OE9A061692T1;Parent=OE9A061692;Name=OE9A061692T1;product=OE9A061692P1
OE9A072632	93.0941	-2.10119	0.565967	-3.71257	0.000205162	0.00925261	OE9A072632	ID=OE9A072632T1;Parent=OE9A072632;Name=OE9A072632T1;product=OE9A072632P1;Description=LEAF RUST 10 DISEASE-RESISTANCE LOCUS RECEPTOR-LIKE PROTEIN KINASE-like;Ontology_term=GO:0004674%2C GO:0005524%2C GO:0006468%2C GO:0009069
OE9A119630	241.066	-2.09791	0.417198	-5.02856	4.94167e-07	3.9394e-05	OE9A119630	ID=OE9A119630T1;Parent=OE9A119630;Name=OE9A119630T1;product=OE9A119630P1;Description=Copper chaperone;Ontology_term=GO:0046872
OE9A078113	1220.32	-2.09717	0.324049	-6.47175	9.68754e-11	1.51682e-08	OE9A078113	ID=OE9A078113T1;Parent=OE9A078113;Name=OE9A078113T1;product=OE9A078113P1;Description=rust resistance kinase Lr10-like;Ontology_term=GO:0004672%2C GO:0005524%2C GO:0006468%2C GO:0016020
OE9A086523	106.362	-2.08151	0.464143	-4.48464	7.30367e-06	0.000460735	OE9A086523	ID=OE9A086523T1;Parent=OE9A086523;Name=OE9A086523T1;product=OE9A086523P1
OE9A069073	132.932	-2.08143	0.431276	-4.82623	1.39145e-06	0.000102641	OE9A069073	ID=OE9A069073T1;Parent=OE9A069073;Name=OE9A069073T1;product=OE9A069073P1;Description=PB1 domain-containing;Ontology_term=GO:0005515
OE9A121470	28.0639	-2.08114	0.689018	-3.02045	0.00252402	0.074669	OE9A121470	ID=OE9A121470T1;Parent=OE9A121470;Name=OE9A121470T1;product=OE9A121470P1;Description=BON1-associated 2-like;Ontology_term=GO:0005515
OE9A045794	46.8569	-2.07998	0.576701	-3.60669	0.000310131	0.013299	OE9A045794	ID=OE9A045794T1;Parent=OE9A045794;Name=OE9A045794T1;product=OE9A045794P1
OE9A066326	44.3298	-2.07049	0.619676	-3.34125	0.000834018	0.0303869	OE9A066326	ID=OE9A066326T1;Parent=OE9A066326;Name=OE9A066326T1;product=OE9A066326P1;Description=receptor kinase HERK 1;Ontology_term=GO:0004672%2C GO:0005524%2C GO:0006468%2C GO:0016020
OE9A042020	618.317	-2.06616	0.317746	-6.50257	7.89573e-11	1.25559e-08	OE9A042020	ID=OE9A042020T1;Parent=OE9A042020;Name=OE9A042020T1;product=OE9A042020P1;Description=Beta-1,4-mannosyl-glyco 4-beta-N-acetylglucosaminyltransferase;Ontology_term=GO:0003830%2C GO:0006487%2C GO:0016021
OE9A089778	819.998	-2.0593	0.207292	-9.93427	2.95323e-23	2.81775e-20	OE9A089778	ID=OE9A089778T1;Parent=OE9A089778;Name=OE9A089778T1;product=OE9A089778P1;Description=GATA transcription factor 5-like;Ontology_term=GO:0003700%2C GO:0005634%2C GO:0005667%2C GO:0008270%2C GO:0043565%2C GO:0045449%2C GO:0045893
OE9A027487	28.9704	-2.05889	0.486716	-4.23017	2.33515e-05	0.00131061	OE9A027487	ID=OE9A027487T1;Parent=OE9A027487;Name=OE9A027487T1;product=OE9A027487P1;Description=probable WRKY transcription factor 40;Ontology_term=GO:0003700%2C GO:0005667%2C GO:0006355%2C GO:0043565%2C GO:0045449
OE9A106082	68.0045	-2.05511	0.575755	-3.56942	0.000357772	0.0150048	OE9A106082	ID=OE9A106082T1;Parent=OE9A106082;Name=OE9A106082T1;product=OE9A106082P1
OE9A116250	432.024	-2.05329	0.42143	-4.87219	1.10366e-06	8.29974e-05	OE9A116250	ID=OE9A116250T1;Parent=OE9A116250;Name=OE9A116250T1;product=OE9A116250P1
OE9A099768	395.423	-2.05124	0.423298	-4.84585	1.2607e-06	9.38819e-05	OE9A099768	ID=OE9A099768T1;Parent=OE9A099768;Name=OE9A099768T1;product=OE9A099768P1;Description=ethylene-responsive transcription factor TINY-like;Ontology_term=GO:0003677%2C GO:0003700%2C GO:0005667%2C GO:0006355%2C GO:0045449
OE9A105042	260.958	-2.04885	0.299017	-6.85195	7.28482e-12	1.35622e-09	OE9A105042	ID=OE9A105042T1;Parent=OE9A105042;Name=OE9A105042T1;product=OE9A105042P1;Description=NAC domain-containing 35-like;Ontology_term=GO:0003677%2C GO:0006355%2C GO:0044699
OE9A016506	27.2843	-2.0427	0.676062	-3.02147	0.00251554	0.07464	OE9A016506	ID=OE9A016506T1;Parent=OE9A016506;Name=OE9A016506T1;product=OE9A016506P1;Description=G-type lectin S-receptor-like serine threonine- kinase LECRK3;Ontology_term=GO:0004674%2C GO:0005524%2C GO:0005886%2C GO:0006468%2C GO:0009069%2C GO:0016021%2C GO:0048544
OE9A106101	85.1249	-2.03931	0.580111	-3.51537	0.000439143	0.0178534	OE9A106101	ID=OE9A106101T1;Parent=OE9A106101;Name=OE9A106101T1;product=OE9A106101P1;Description=ankyrin repeat-containing BDA1-like;Ontology_term=GO:0005515
OE9A089996	79.85	-2.0379	0.592453	-3.43976	0.000582226	0.0227347	OE9A089996	ID=OE9A089996T1;Parent=OE9A089996;Name=OE9A089996T1;product=OE9A089996P1
OE9A074436	149.709	-2.03696	0.36054	-5.64976	1.60676e-08	1.73963e-06	OE9A074436	ID=OE9A074436T1;Parent=OE9A074436;Name=OE9A074436T1;product=OE9A074436P1;Description=zinc finger ZAT9-like;Ontology_term=GO:0003676%2C GO:0046872
OE9A037327	10626.1	-2.02808	0.308098	-6.5826	4.62299e-11	7.58867e-09	OE9A037327	ID=OE9A037327T1;Parent=OE9A037327;Name=OE9A037327T1;product=OE9A037327P1;Description=NDR1 HIN1 3;Ontology_term=GO:0016021
OE9A027867	1690.72	-2.02624	0.32794	-6.17869	6.4637e-10	8.88963e-08	OE9A027867	ID=OE9A027867T1;Parent=OE9A027867;Name=OE9A027867T1;product=OE9A027867P1;Description=calcium-transporting ATPase 11, plasma membrane-type;Ontology_term=GO:0005388%2C GO:0005516%2C GO:0005524%2C GO:0005887%2C GO:0016529%2C GO:0046872%2C GO:0070588
OE9A008443	99.8699	-2.0215	0.477289	-4.23538	2.28167e-05	0.00128531	OE9A008443	ID=OE9A008443T1;Parent=OE9A008443;Name=OE9A008443T1;product=OE9A008443P1;Description=GATA transcription factor 8-like;Ontology_term=GO:0000785%2C GO:0000977%2C GO:0001085%2C GO:0001228%2C GO:0003682%2C GO:0005634%2C GO:0005667%2C GO:0008270%2C GO:0030154%2C GO:0045893
OE9A065125	1627.5	-2.02097	0.304399	-6.63923	3.15331e-11	5.26102e-09	OE9A065125	ID=OE9A065125T1;Parent=OE9A065125;Name=OE9A065125T1;product=OE9A065125P1
OE9A005384	1023.7	-2.01782	0.294871	-6.84307	7.75132e-12	1.43432e-09	OE9A005384	ID=OE9A005384T1;Parent=OE9A005384;Name=OE9A005384T1;product=OE9A005384P1;Description=probable WRKY transcription factor 46;Ontology_term=GO:0003700%2C GO:0005667%2C GO:0006355%2C GO:0043565%2C GO:0045449
OE9A064613	19.5071	-2.01681	0.6767	-2.98036	0.00287911	0.0820775	OE9A064613	ID=OE9A064613T1;Parent=OE9A064613;Name=OE9A064613T1;product=OE9A064613P1;Description=probable hydroxyacylglutathione hydrolase 2, chloroplastic;Ontology_term=GO:0004416%2C GO:0006090%2C GO:0019243
OE9A065545	3357.65	-2.01313	0.242743	-8.29325	1.10198e-16	4.25895e-14	OE9A065545	ID=OE9A065545T1;Parent=OE9A065545;Name=OE9A065545T1;product=OE9A065545P1;Description=inorganic phosphate transporter 1-4-like;Ontology_term=GO:0005315%2C GO:0006817%2C GO:0016021%2C GO:0055085
OE9A057599	106.744	-2.00856	0.608682	-3.29985	0.000967372	0.0343041	OE9A057599	ID=OE9A057599T1;Parent=OE9A057599;Name=OE9A057599T1;product=OE9A057599P1;Description=calcium-binding CML42;Ontology_term=GO:0005509
OE9A024286	72.31	-2.00851	0.612105	-3.28132	0.00103323	0.0362603	OE9A024286	ID=OE9A024286T1;Parent=OE9A024286;Name=OE9A024286T1;product=OE9A024286P1
OE9A118656	33.8397	-2.00322	0.588651	-3.40307	0.000666337	0.0252778	OE9A118656	ID=OE9A118656T1;Parent=OE9A118656;Name=OE9A118656T1;product=OE9A118656P1;Description=clathrin assembly At4g40080;Ontology_term=GO:0005543
OE9A042951	1411.24	-2.00045	0.235856	-8.48163	2.22052e-17	9.54886e-15	OE9A042951	ID=OE9A042951T1;Parent=OE9A042951;Name=OE9A042951T1;product=OE9A042951P1;Description=probable LRR receptor-like serine threonine- kinase At2g24230;Ontology_term=GO:0004672%2C GO:0005515%2C GO:0005524%2C GO:0006468%2C GO:0016020

## Sheet: ShinyGO FC <-2
	Enrichment FDR	nGenes	Pathway Genes	Fold Enrichment	Pathways (click for details)	Genes
	1.3e-22	56	1164	5.6	GO:0003700 Transcription factor activity, sequence-specific DNA binding	OE9A000299 OE9A002219 OE9A004162 OE9A005384 OE9A005875 OE9A009930 OE9A012128 OE9A016967 OE9A019029 OE9A027487 OE9A028341 OE9A031175 OE9A033879 OE9A042006 OE9A043316 OE9A043605 OE9A046042 OE9A047442 OE9A047454 OE9A051495 OE9A056063 OE9A056651 OE9A058641 OE9A060030 OE9A062775 OE9A070362 OE9A073161 OE9A073838 OE9A075123 OE9A076184 OE9A079911 OE9A080959 OE9A081134 OE9A081748 OE9A084330 OE9A085764 OE9…
	1.8e-15	63	2097	3.5	GO:0006355 Reg. of transcription, DNA-templated	OE9A000299 OE9A002219 OE9A004162 OE9A005384 OE9A005875 OE9A009930 OE9A012128 OE9A013451 OE9A015716 OE9A016967 OE9A019029 OE9A027487 OE9A028341 OE9A031175 OE9A033879 OE9A042006 OE9A043316 OE9A043605 OE9A046042 OE9A047442 OE9A047454 OE9A051495 OE9A056063 OE9A056651 OE9A058641 OE9A060030 OE9A061095 OE9A062775 OE9A070362 OE9A073161 OE9A073838 OE9A075123 OE9A076184 OE9A079911 OE9A080959 OE9A081134 OE9…
	1.3e-11	61	2430	2.9	GO:0005667 Transcription factor complex	OE9A000299 OE9A000795 OE9A002219 OE9A004162 OE9A005384 OE9A005875 OE9A008443 OE9A009930 OE9A012128 OE9A016967 OE9A019029 OE9A022966 OE9A027487 OE9A028341 OE9A031175 OE9A031595 OE9A033879 OE9A042006 OE9A043316 OE9A043605 OE9A046042 OE9A047442 OE9A047454 OE9A051495 OE9A056063 OE9A056651 OE9A058641 OE9A060030 OE9A062775 OE9A070362 OE9A073161 OE9A073838 OE9A075123 OE9A076184 OE9A078448 OE9A079911 OE9…
	8.1e-09	25	588	4.9	GO:0005509 Calcium ion binding	OE9A002067 OE9A006276 OE9A016940 OE9A020249 OE9A023580 OE9A024278 OE9A027095 OE9A030371 OE9A032760 OE9A039140 OE9A051863 OE9A057599 OE9A058655 OE9A068607 OE9A072634 OE9A077755 OE9A080031 OE9A089257 OE9A090940 OE9A103265 OE9A106281 OE9A107679 OE9A109323 OE9A114342 OE9A115883
	9e-07	9	73	14.3	GO:0016762 Xyloglucan:xyloglucosyl transferase activity	OE9A008141 OE9A032361 OE9A041022 OE9A075608 OE9A085531 OE9A090863 OE9A100291 OE9A112468 OE9A117660
	1e-05	22	686	3.7	GO:0043565 Sequence-specific DNA binding	OE9A004162 OE9A005384 OE9A012128 OE9A027487 OE9A031175 OE9A042006 OE9A043605 OE9A056651 OE9A060030 OE9A062775 OE9A080959 OE9A081134 OE9A085764 OE9A087855 OE9A089778 OE9A091786 OE9A097645 OE9A104316 OE9A105450 OE9A108402 OE9A115035 OE9A118750
	1.1e-05	5	17	34	GO:0001085 RNA polymerase II transcription factor binding	OE9A000795 OE9A008443 OE9A022966 OE9A031595 OE9A078448
	1.1e-05	15	334	5.2	GO:0004553 Hydrolase activity, hydrolyzing O-glycosyl compounds	OE9A008141 OE9A032361 OE9A041022 OE9A051211 OE9A054617 OE9A075608 OE9A083347 OE9A085531 OE9A087360 OE9A090863 OE9A093988 OE9A100291 OE9A112468 OE9A117660 OE9A117672
	3.8e-05	8	89	10.4	GO:0042546 Cell wall biogenesis	OE9A008141 OE9A032361 OE9A041022 OE9A085531 OE9A090863 OE9A100291 OE9A112468 OE9A117660
	4e-05	47	2562	2.1	GO:0003677 DNA binding	OE9A000299 OE9A002219 OE9A005875 OE9A009930 OE9A013451 OE9A015716 OE9A016967 OE9A019029 OE9A028341 OE9A033879 OE9A041554 OE9A043316 OE9A046042 OE9A047442 OE9A047454 OE9A051495 OE9A056063 OE9A058641 OE9A061095 OE9A066937 OE9A070362 OE9A073161 OE9A073838 OE9A075123 OE9A076184 OE9A079911 OE9A081316 OE9A081748 OE9A084330 OE9A085648 OE9A092389 OE9A094502 OE9A095378 OE9A096223 OE9A096749 OE9A098399 OE9…
	0.00024	10	195	5.9	GO:0048046 Apoplast	OE9A008141 OE9A032361 OE9A041022 OE9A041775 OE9A075608 OE9A085531 OE9A090863 OE9A100291 OE9A112468 OE9A117660
	0.00027	5	34	17	GO:0030154 Cell differentiation	OE9A000795 OE9A008443 OE9A022966 OE9A031595 OE9A078448
	0.00033	5	36	16.1	GO:0000977 RNA polymerase II regulatory region sequence-specific DNA binding	OE9A000795 OE9A008443 OE9A022966 OE9A031595 OE9A078448
	0.00046	3	7	49.6	GO:0006839 Mitochondrial transport	OE9A039396 OE9A090698 OE9A095768
	0.00046	8	134	6.9	GO:0010411 Xyloglucan metabolic process	OE9A008141 OE9A032361 OE9A041022 OE9A085531 OE9A090863 OE9A100291 OE9A112468 OE9A117660
	0.00046	5	40	14.5	GO:0001228 Transcriptional activator activity, RNA polymerase II transcription regulatory region seq	OE9A000795 OE9A008443 OE9A022966 OE9A031595 OE9A078448
	0.00055	5	42	13.8	GO:0044212 Transcription regulatory region DNA binding	OE9A012128 OE9A062775 OE9A080959 OE9A087855 OE9A091786
	0.0024	4	32	14.5	GO:0006032 Chitin catabolic process	OE9A010255 OE9A070518 OE9A112876 OE9A116045
	0.0024	37	2248	1.9	GO:0016020 Membrane	OE9A002800 OE9A003527 OE9A006737 OE9A010897 OE9A010940 OE9A014277 OE9A014923 OE9A018426 OE9A020056 OE9A021015 OE9A022893 OE9A027477 OE9A036280 OE9A042951 OE9A052433 OE9A055836 OE9A057817 OE9A064741 OE9A066326 OE9A068770 OE9A069045 OE9A071166 OE9A071875 OE9A078113 OE9A080031 OE9A085702 OE9A091063 OE9A095005 OE9A095575 OE9A098085 OE9A101290 OE9A104782 OE9A107254 OE9A112887 OE9A113289 OE9A115757 OE9…
	0.0024	3	13	26.7	GO:0003830 Beta-1,4-mannosylglycoprotein 4-beta-N-acetylglucosaminyltransferase activity	OE9A042020 OE9A050550 OE9A081767
