# Supplementary material for: Comparative transcriptomics of biopesticide-treated olives subjected to Xylella infection
Source: Research Square preprint supplement (doi:10.21203/rs.3.rs-8603179/v1), 2026-01-29
Supplement: Supplementary file 7 [file 37fd04a6f8a629013c8431d8.xlsx]

## Sheet: UP FC>2
List of Differential Expressed Genes (DEGs) in T1 Sankari©_vs_T0_Sankari©
DEGs with fold change (FC) >2 of olives treated with Sankari© at T1 compared with the same plants at T0.
Gene ID	baseMean	log2FoldChange	lfcSE	stat	pvalue	padj	Description
OE9A002730	36.5045	9.62266	1.74911	5.50146	3.76659e-08	7.43988e-07	ID=OE9A002730T1;Parent=OE9A002730;Name=OE9A002730T1;product=OE9A002730P1;Description=crocetin glucosyltransferase, chloroplastic-like;Ontology_term=GO:0005215%2C GO:0006810%2C GO:0008152%2C GO:0009507%2C GO:0016020%2C GO:0016758
OE9A008731	8.64759	7.38449	1.47678	5.0004	5.72122e-07	9.03501e-06	ID=OE9A008731T1;Parent=OE9A008731;Name=OE9A008731T1;product=OE9A008731P1;Description=crocetin glucosyltransferase, chloroplastic-like;Ontology_term=GO:0005215%2C GO:0006810%2C GO:0008152%2C GO:0009507%2C GO:0016020%2C GO:0016758
OE9A043940	85.992	7.05125	0.524523	13.4432	3.37668e-41	1.94056e-38	ID=OE9A043940T1;Parent=OE9A043940;Name=OE9A043940T1;product=OE9A043940P1;Description=zinc finger CONSTANS-LIKE 6;Ontology_term=GO:0005515
OE9A101653	41.3393	6.64303	0.852575	7.79172	6.61037e-15	3.58098e-13	ID=OE9A101653T1;Parent=OE9A101653;Name=OE9A101653T1;product=OE9A101653P1;Description=RING-H2 finger ATL78-like;Ontology_term=GO:0005515%2C GO:0008270%2C GO:0016021
OE9A051307	88.1869	6.51548	1.51526	4.29992	1.70863e-05	0.000193114	ID=OE9A051307T1;Parent=OE9A051307;Name=OE9A051307T1;product=OE9A051307P1;Description=probable glucan 1,3-beta-glucosidase A;Ontology_term=GO:0004553%2C GO:0005975%2C GO:0007015%2C GO:0051015
OE9A106481	36.148	6.3425	1.51718	4.18045	2.90936e-05	0.000308635	ID=OE9A106481T1;Parent=OE9A106481;Name=OE9A106481T1;product=OE9A106481P1
OE9A111642	3.80808	6.15379	1.18349	5.19969	1.99616e-07	3.42889e-06	ID=OE9A111642T1;Parent=OE9A111642;Name=OE9A111642T1;product=OE9A111642P1;Description=zinc finger CONSTANS-LIKE 10-like isoform X1;Ontology_term=GO:0005515%2C GO:0005622%2C GO:0008270
OE9A077814	379.159	5.98365	0.36162	16.5468	1.68831e-61	2.78952e-58	ID=OE9A077814T1;Parent=OE9A077814;Name=OE9A077814T1;product=OE9A077814P1;Description=auxin-binding ABP19a;Ontology_term=GO:0005618%2C GO:0009734%2C GO:0030145%2C GO:0045735%2C GO:0048046
OE9A100232	35.0466	5.8779	1.26538	4.64516	3.3981e-06	4.54156e-05	ID=OE9A100232T1;Parent=OE9A100232;Name=OE9A100232T1;product=OE9A100232P1;Description=ethylene-responsive transcription factor ERF020-like;Ontology_term=GO:0003677%2C GO:0003700%2C GO:0005667%2C GO:0006355%2C GO:0045449
OE9A042128	21.0467	5.84991	0.866792	6.74892	1.48955e-11	5.17446e-10	ID=OE9A042128T1;Parent=OE9A042128;Name=OE9A042128T1;product=OE9A042128P1;Description=RING-H2 finger ATL78-like;Ontology_term=GO:0005515%2C GO:0008270%2C GO:0016020
OE9A071429	3.46402	5.80641	1.37865	4.21165	2.53507e-05	0.000274232	ID=OE9A071429T1;Parent=OE9A071429;Name=OE9A071429T1;product=OE9A071429P1
OE9A083187	11.7482	5.78024	1.37809	4.19437	2.73626e-05	0.000292739	ID=OE9A083187T1;Parent=OE9A083187;Name=OE9A083187T1;product=OE9A083187P1;Description=ethylene-responsive transcription factor ABR1-like;Ontology_term=GO:0003677%2C GO:0003700%2C GO:0005667%2C GO:0006355%2C GO:0045449
OE9A061348	3.90662	5.77122	1.32783	4.34635	1.38419e-05	0.000160002	ID=OE9A061348T1;Parent=OE9A061348;Name=OE9A061348T1;product=OE9A061348P1;Description=zinc finger CONSTANS-LIKE 9-like;Ontology_term=GO:0005515%2C GO:0005622%2C GO:0008270
OE9A091509	3.54833	5.71783	1.35804	4.21037	2.54957e-05	0.000275554	ID=OE9A091509T1;Parent=OE9A091509;Name=OE9A091509T1;product=OE9A091509P1;Description=ethylene-responsive transcription factor ERF039-like;Ontology_term=GO:0003677%2C GO:0003700%2C GO:0005667%2C GO:0006355%2C GO:0045449
OE9A048512	16.6057	5.58299	1.61422	3.45863	0.000542924	0.00396375	ID=OE9A048512T1;Parent=OE9A048512;Name=OE9A048512T1;product=OE9A048512P1;Description=scopoletin glucosyltransferase-like;Ontology_term=GO:0009805%2C GO:0009809%2C GO:0009811%2C GO:0042802%2C GO:0050275
OE9A000648	34.2612	5.55984	0.752592	7.38758	1.49521e-13	6.89834e-12	ID=OE9A000648T1;Parent=OE9A000648;Name=OE9A000648T1;product=OE9A000648P1;Description=aluminum-activated malate transporter 9-like;Ontology_term=GO:0015743%2C GO:0016021
OE9A033224	77.6118	5.54984	1.3991	3.96671	7.28723e-05	0.00069891	ID=OE9A033224T1;Parent=OE9A033224;Name=OE9A033224T1;product=OE9A033224P1;Description=glucan 1,3-beta-glucosidase A-like;Ontology_term=GO:0004338%2C GO:0005982%2C GO:0005985%2C GO:0007015%2C GO:0051015
OE9A110773	7.50428	5.52742	1.23701	4.46837	7.8819e-06	9.69144e-05	ID=OE9A110773T1;Parent=OE9A110773;Name=OE9A110773T1;product=OE9A110773P1;Description=lysosomal Pro-X carboxypeptidase-like;Ontology_term=GO:0004185%2C GO:0006508%2C GO:0008239
OE9A117924	5.66844	5.51618	1.5878	3.4741	0.000512563	0.00377231	ID=OE9A117924T1;Parent=OE9A117924;Name=OE9A117924T1;product=OE9A117924P1;Description=calcium-binding CML19;Ontology_term=GO:0005509
OE9A049120	156.62	5.49291	1.27261	4.31625	1.587e-05	0.000180992	ID=OE9A049120T1;Parent=OE9A049120;Name=OE9A049120T1;product=OE9A049120P1;Description=sugar transport 13;Ontology_term=GO:0005358%2C GO:0005887%2C GO:0009506%2C GO:0015992%2C GO:0032440%2C GO:0046323%2C GO:0055114%2C GO:1904659
OE9A011619	6.72223	5.46749	1.41551	3.86256	0.000112204	0.00102389	ID=OE9A011619T1;Parent=OE9A011619;Name=OE9A011619T1;product=OE9A011619P1
OE9A089718	3.5456	5.33819	1.68008	3.17734	0.0014863	0.00939138	ID=OE9A089718T1;Parent=OE9A089718;Name=OE9A089718T1;product=OE9A089718P1;Description=probable metal-nicotianamine transporter YSL7;Ontology_term=GO:0016021%2C GO:0055085
OE9A115487	34.0112	5.24691	0.617585	8.49585	1.96486e-17	1.45907e-15	ID=OE9A115487T1;Parent=OE9A115487;Name=OE9A115487T1;product=OE9A115487P1
OE9A033449	4.42106	5.21988	1.16754	4.47082	7.79185e-06	9.5941e-05	ID=OE9A033449T1;Parent=OE9A033449;Name=OE9A033449T1;product=OE9A033449P1;Description=ubiquitin receptor RAD23c-like;Ontology_term=GO:0003684%2C GO:0005515%2C GO:0005634%2C GO:0006289%2C GO:0016021%2C GO:0043161
OE9A101401	3.79894	5.19708	1.20946	4.29705	1.7309e-05	0.000195297	ID=OE9A101401T1;Parent=OE9A101401;Name=OE9A101401T1;product=OE9A101401P1
OE9A000642	4.33905	5.05341	1.17949	4.28442	1.8322e-05	0.000205499	ID=OE9A000642T1;Parent=OE9A000642;Name=OE9A000642T1;product=OE9A000642P1
OE9A038556	3.66861	5.02652	1.51188	3.32469	0.000885183	0.00606864	ID=OE9A038556T1;Parent=OE9A038556;Name=OE9A038556T1;product=OE9A038556P1;Description=transcription factor WER-like;Ontology_term=GO:0003677
OE9A030382	153.597	5.02607	1.14453	4.39137	1.12637e-05	0.000133407	ID=OE9A030382T1;Parent=OE9A030382;Name=OE9A030382T1;product=OE9A030382P1;Description=sugar transport 13;Ontology_term=GO:0005358%2C GO:0005887%2C GO:0009506%2C GO:0015992%2C GO:0032440%2C GO:0046323%2C GO:0055114%2C GO:1904659
OE9A047267	571.482	5.00414	0.702812	7.12017	1.07797e-12	4.39092e-11	ID=OE9A047267T1;Parent=OE9A047267;Name=OE9A047267T1;product=OE9A047267P1;Description=DMR6-LIKE OXYGENASE 2-like;Ontology_term=GO:0005506%2C GO:0051213%2C GO:0055114
OE9A058030	35.5747	4.99683	0.5808	8.60337	7.74093e-18	6.07238e-16	ID=OE9A058030T1;Parent=OE9A058030;Name=OE9A058030T1;product=OE9A058030P1;Description=late blight resistance homolog R1A-3;Ontology_term=GO:0043531
OE9A046262	19.2345	4.94794	1.05133	4.70635	2.52195e-06	3.45979e-05	ID=OE9A046262T1;Parent=OE9A046262;Name=OE9A046262T1;product=OE9A046262P1;Description=polyphenol oxidase, chloroplastic-like;Ontology_term=GO:0004097%2C GO:0006118%2C GO:0006570%2C GO:0046148%2C GO:0055114
OE9A037954	11.0592	4.92269	1.32257	3.72208	0.00019759	0.00167205	ID=OE9A037954T1;Parent=OE9A037954;Name=OE9A037954T1;product=OE9A037954P1
OE9A073670	4.24987	4.90783	1.50172	3.26813	0.00108262	0.00720545	ID=OE9A073670T1;Parent=OE9A073670;Name=OE9A073670T1;product=OE9A073670P1;Description=spermidine hydroxycinnamoyl transferase-like;Ontology_term=GO:0009555%2C GO:0016410%2C GO:0042967
OE9A088586	21.476	4.88545	1.66103	2.94121	0.00326932	0.0180365	ID=OE9A088586T1;Parent=OE9A088586;Name=OE9A088586T1;product=OE9A088586P1;Description=peroxidase A2-like;Ontology_term=GO:0004601%2C GO:0005576%2C GO:0006804%2C GO:0006979%2C GO:0020037%2C GO:0042744%2C GO:0046872%2C GO:0055114%2C GO:0098869
OE9A014370	42.8166	4.82826	1.27891	3.7753	0.000159815	0.00138702	ID=OE9A014370T1;Parent=OE9A014370;Name=OE9A014370T1;product=OE9A014370P1;Description=sterol 22-desaturase;Ontology_term=GO:0000249%2C GO:0004497%2C GO:0005506%2C GO:0016021%2C GO:0016126%2C GO:0020037%2C GO:0055114
OE9A092818	221.304	4.8161	0.76906	6.26232	3.79282e-10	1.05544e-08	ID=OE9A092818T1;Parent=OE9A092818;Name=OE9A092818T1;product=OE9A092818P1;Description=DMR6-LIKE OXYGENASE 2-like;Ontology_term=GO:0005506%2C GO:0051213%2C GO:0055114
OE9A111055	356.684	4.76228	0.356447	13.3604	1.02962e-40	5.67063e-38	ID=OE9A111055T1;Parent=OE9A111055;Name=OE9A111055T1;product=OE9A111055P1;Description=trans-resveratrol di-O-methyltransferase-like;Ontology_term=GO:0008171%2C GO:0008757%2C GO:0019438%2C GO:0046983
OE9A070888	4.79065	4.73247	1.32709	3.56607	0.000362382	0.00283178	ID=OE9A070888T1;Parent=OE9A070888;Name=OE9A070888T1;product=OE9A070888P1
OE9A002628	78.5999	4.71862	0.875083	5.39219	6.96023e-08	1.30868e-06	ID=OE9A002628T1;Parent=OE9A002628;Name=OE9A002628T1;product=OE9A002628P1;Description=DMR6-LIKE OXYGENASE 2-like;Ontology_term=GO:0005506%2C GO:0051213%2C GO:0055114
OE9A049747	3.98618	4.59693	1.24355	3.69661	0.000218497	0.00182387	ID=OE9A049747T1;Parent=OE9A049747;Name=OE9A049747T1;product=OE9A049747P1;Description=;Ontology_term=GO:0004672%2C GO:0005524%2C GO:0006468
OE9A079030	83.3932	4.59194	1.07088	4.28801	1.80278e-05	0.000202543	ID=OE9A079030T1;Parent=OE9A079030;Name=OE9A079030T1;product=OE9A079030P1;Description=receptor kinase At4g00960;Ontology_term=GO:0004672%2C GO:0005524%2C GO:0006468
OE9A086934	59.541	4.58295	0.575763	7.95979	1.72337e-15	9.92571e-14	ID=OE9A086934T1;Parent=OE9A086934;Name=OE9A086934T1;product=OE9A086934P1;Description=1-aminocyclopropane-1-carboxylate synthase 3-like;Ontology_term=GO:0006519%2C GO:0008171%2C GO:0016847%2C GO:0030170%2C GO:0042218
OE9A100427	362.969	4.5497	0.433665	10.4913	9.47459e-26	1.69237e-23	ID=OE9A100427T1;Parent=OE9A100427;Name=OE9A100427T1;product=OE9A100427P1;Description=NRT1 PTR FAMILY -like;Ontology_term=GO:0005215%2C GO:0006810%2C GO:0016021
OE9A040556	31.538	4.54906	0.53936	8.43419	3.33516e-17	2.41557e-15	ID=OE9A040556T1;Parent=OE9A040556;Name=OE9A040556T1;product=OE9A040556P1
OE9A097997	92.5993	4.5327	1.08713	4.16941	3.05394e-05	0.000321702	ID=OE9A097997T1;Parent=OE9A097997;Name=OE9A097997T1;product=OE9A097997P1;Description=glucan endo-1,3-beta-glucosidase 11-like;Ontology_term=GO:0004553%2C GO:0005975%2C GO:0016021%2C GO:0030247%2C GO:0046658
OE9A119528	13.7308	4.51236	1.03363	4.36556	1.268e-05	0.000147994	ID=OE9A119528T1;Parent=OE9A119528;Name=OE9A119528T1;product=OE9A119528P1;Description=cannabidiolic acid synthase-like;Ontology_term=GO:0016614%2C GO:0050660%2C GO:0055114
OE9A016054	31.1032	4.45305	0.632758	7.03752	1.95693e-12	7.65288e-11	ID=OE9A016054T1;Parent=OE9A016054;Name=OE9A016054T1;product=OE9A016054P1
OE9A000462	4.70686	4.37063	1.61498	2.70631	0.0068035	0.0325416	ID=OE9A000462T1;Parent=OE9A000462;Name=OE9A000462T1;product=OE9A000462P1;Description=basic 7S globulin-like;Ontology_term=GO:0004190%2C GO:0006508%2C GO:0030163
OE9A061329	19.344	4.36286	0.944326	4.62008	3.83588e-06	5.07026e-05	ID=OE9A061329T1;Parent=OE9A061329;Name=OE9A061329T1;product=OE9A061329P1;Description=calmodulin-like isoform X1;Ontology_term=GO:0005509
OE9A031797	4.71292	4.36063	1.50417	2.89902	0.00374329	0.0201584	ID=OE9A031797T1;Parent=OE9A031797;Name=OE9A031797T1;product=OE9A031797P1;Description=hydroxymethylglutaryl- synthase;Ontology_term=GO:0004421%2C GO:0006084%2C GO:0006550%2C GO:0006552%2C GO:0006574%2C GO:0008299%2C GO:0046950
OE9A075288	508.181	4.35378	0.419816	10.3707	3.37138e-25	5.6054e-23	ID=OE9A075288T1;Parent=OE9A075288;Name=OE9A075288T1;product=OE9A075288P1;Description=high-affinity nitrate transporter -like;Ontology_term=GO:0010167%2C GO:0015706%2C GO:0016021
OE9A032622	7.23512	4.3315	1.44383	3.00001	0.0026997	0.015478	ID=OE9A032622T1;Parent=OE9A032622;Name=OE9A032622T1;product=OE9A032622P1;Description=lon protease homolog 2, peroxisomal-like isoform X1;Ontology_term=GO:0004176%2C GO:0004252%2C GO:0005524%2C GO:0005782%2C GO:0006510%2C GO:0006515%2C GO:0016485%2C GO:0016558
OE9A011527	17.913	4.31175	1.32631	3.25093	0.00115029	0.00757955	ID=OE9A011527T1;Parent=OE9A011527;Name=OE9A011527T1;product=OE9A011527P1;Description=U-box domain-containing 21-like;Ontology_term=GO:0004842%2C GO:0005488%2C GO:0016567
OE9A095699	7.85927	4.30165	1.38604	3.10355	0.00191213	0.0115904	ID=OE9A095699T1;Parent=OE9A095699;Name=OE9A095699T1;product=OE9A095699P1
OE9A114766	22.0272	4.29865	0.903534	4.7576	1.95909e-06	2.76511e-05	ID=OE9A114766T1;Parent=OE9A114766;Name=OE9A114766T1;product=OE9A114766P1;Description=ethylene-responsive transcription factor ABR1-like;Ontology_term=GO:0003677%2C GO:0003700%2C GO:0005667%2C GO:0006355%2C GO:0045449
OE9A036165	12.5387	4.29618	1.3808	3.11137	0.00186221	0.0113275	ID=OE9A036165T1;Parent=OE9A036165;Name=OE9A036165T1;product=OE9A036165P1;Description=ethylene-responsive transcription factor 1B-like;Ontology_term=GO:0003677%2C GO:0003700%2C GO:0005634%2C GO:0005667%2C GO:0006355%2C GO:0045449
OE9A074071	8.20673	4.28709	1.20764	3.54996	0.000385285	0.00297644	ID=OE9A074071T1;Parent=OE9A074071;Name=OE9A074071T1;product=OE9A074071P1;Description=peroxidase 10;Ontology_term=GO:0004601%2C GO:0005576%2C GO:0006804%2C GO:0006979%2C GO:0016021%2C GO:0020037%2C GO:0042744%2C GO:0046872%2C GO:0055114%2C GO:0098869
OE9A009890	4.99744	4.27715	1.17629	3.63614	0.000276752	0.00222987	ID=OE9A009890T1;Parent=OE9A009890;Name=OE9A009890T1;product=OE9A009890P1;Description=glutathione gamma-glutamylcysteinyltransferase 1-like isoform X2;Ontology_term=GO:0010038%2C GO:0016756%2C GO:0046872%2C GO:0046938
OE9A103263	6337.6	4.24872	0.818149	5.19309	2.06831e-07	3.54131e-06	ID=OE9A103263T1;Parent=OE9A103263;Name=OE9A103263T1;product=OE9A103263P1
OE9A002846	14.4473	4.22003	1.22097	3.45631	0.000547632	0.00399261	ID=OE9A002846T1;Parent=OE9A002846;Name=OE9A002846T1;product=OE9A002846P1;Description=peroxidase 10;Ontology_term=GO:0004601%2C GO:0005576%2C GO:0006804%2C GO:0006979%2C GO:0016021%2C GO:0020037%2C GO:0042744%2C GO:0046872%2C GO:0055114%2C GO:0098869
OE9A066427	586.284	4.20553	0.278612	15.0945	1.7591e-51	1.7886e-48	ID=OE9A066427T1;Parent=OE9A066427;Name=OE9A066427T1;product=OE9A066427P1;Description=zinc finger CONSTANS-LIKE 16-like;Ontology_term=GO:0005515%2C GO:0005622%2C GO:0008270
OE9A048738	20.5604	4.16716	1.06647	3.90743	9.32829e-05	0.00087108	ID=OE9A048738T1;Parent=OE9A048738;Name=OE9A048738T1;product=OE9A048738P1;Description=probable feruloyl esterase A;Ontology_term=GO:0006629%2C GO:0016787
OE9A097538	688.291	4.16702	0.253923	16.4106	1.60725e-60	2.49936e-57	ID=OE9A097538T1;Parent=OE9A097538;Name=OE9A097538T1;product=OE9A097538P1;Description=universal stress A;Ontology_term=GO:0005773%2C GO:0006950
OE9A052171	5.53516	4.1327	1.37621	3.00295	0.00267375	0.0153459	ID=OE9A052171T1;Parent=OE9A052171;Name=OE9A052171T1;product=OE9A052171P1;Description=ethylene receptor 2;Ontology_term=GO:0000155%2C GO:0005515%2C GO:0005789%2C GO:0009365%2C GO:0010105%2C GO:0016021%2C GO:0018106%2C GO:0023014%2C GO:0038199%2C GO:0051740
OE9A057780	5.4762	4.1297	1.60147	2.57869	0.00991752	0.0439088	ID=OE9A057780T1;Parent=OE9A057780;Name=OE9A057780T1;product=OE9A057780P1;Description=beta-glucosidase-like;Ontology_term=GO:0004553%2C GO:0005975
OE9A059264	7.00958	4.06653	1.21038	3.35972	0.000780216	0.00544504	ID=OE9A059264T1;Parent=OE9A059264;Name=OE9A059264T1;product=OE9A059264P1;Description=AAA-ATPase At5g57480-like;Ontology_term=GO:0005524%2C GO:0005739%2C GO:0034551
OE9A040328	7.12617	4.05655	1.23321	3.28943	0.0010039	0.00675293	ID=OE9A040328T1;Parent=OE9A040328;Name=OE9A040328T1;product=OE9A040328P1;Description=ethylene-responsive transcription factor ERF023-like;Ontology_term=GO:0003677%2C GO:0003700%2C GO:0005667%2C GO:0006355%2C GO:0045449
OE9A046683	65.0526	4.02856	1.10858	3.63398	0.000279083	0.00224455	ID=OE9A046683T1;Parent=OE9A046683;Name=OE9A046683T1;product=OE9A046683P1;Description=serine carboxypeptidase-like 50;Ontology_term=GO:0004185%2C GO:0006508
OE9A010654	3.90751	4.02132	1.77776	2.26202	0.0236962	0.0864047	ID=OE9A010654T1;Parent=OE9A010654;Name=OE9A010654T1;product=OE9A010654P1
OE9A030969	5.60744	3.99475	1.26821	3.1499	0.00163325	0.0101568	ID=OE9A030969T1;Parent=OE9A030969;Name=OE9A030969T1;product=OE9A030969P1;Description=gibberellin 2-beta-dioxygenase 1-like;Ontology_term=GO:0005506%2C GO:0009416%2C GO:0045487%2C GO:0052634%2C GO:0055114
OE9A110624	20.2776	3.98645	0.590056	6.75605	1.41801e-11	4.94545e-10	ID=OE9A110624T1;Parent=OE9A110624;Name=OE9A110624T1;product=OE9A110624P1;Description=kinase TMKL1;Ontology_term=GO:0004672%2C GO:0005524%2C GO:0006468%2C GO:0016021
OE9A113333	5.40531	3.98251	1.72053	2.3147	0.0206295	0.0775211	ID=OE9A113333T2;Parent=OE9A113333;Name=OE9A113333T2;product=OE9A113333P2
OE9A078174	34.0726	3.96804	1.6585	2.39254	0.0167322	0.0660098	ID=OE9A078174T1;Parent=OE9A078174;Name=OE9A078174T1;product=OE9A078174P1
OE9A050140	5.99644	3.95909	0.960848	4.12041	3.78201e-05	0.000389791	ID=OE9A050140T1;Parent=OE9A050140;Name=OE9A050140T1;product=OE9A050140P1;Description=zeatin O-glucosyltransferase-like;Ontology_term=GO:0008152%2C GO:0016758
OE9A076339	7.63432	3.94437	1.54234	2.55739	0.0105462	0.0460674	ID=OE9A076339T1;Parent=OE9A076339;Name=OE9A076339T1;product=OE9A076339P1;Description=cytokinin dehydrogenase 5;Ontology_term=GO:0009690%2C GO:0016614%2C GO:0019139%2C GO:0050660%2C GO:0055114
OE9A013709	67.2874	3.93644	0.4785	8.22663	1.92552e-16	1.23551e-14	ID=OE9A013709T1;Parent=OE9A013709;Name=OE9A013709T1;product=OE9A013709P1
OE9A052260	22.8351	3.91725	0.910943	4.30021	1.70635e-05	0.000192938	ID=OE9A052260T1;Parent=OE9A052260;Name=OE9A052260T1;product=OE9A052260P1;Description=transmembrane 45A-like;Ontology_term=GO:0016021
OE9A106798	26.8413	3.91117	1.16866	3.34673	0.00081771	0.00565889	ID=OE9A106798T1;Parent=OE9A106798;Name=OE9A106798T1;product=OE9A106798P1;Description=pyruvate decarboxylase 1;Ontology_term=GO:0000287%2C GO:0004737%2C GO:0005829%2C GO:0006094%2C GO:0006096%2C GO:0009507%2C GO:0016020%2C GO:0030976%2C GO:0034059
OE9A025034	4.4248	3.90722	1.73721	2.24913	0.0245042	0.0886657	ID=OE9A025034T1;Parent=OE9A025034;Name=OE9A025034T1;product=OE9A025034P1
OE9A029225	24.6187	3.89833	1.02131	3.81699	0.000135089	0.00120162	ID=OE9A029225T1;Parent=OE9A029225;Name=OE9A029225T1;product=OE9A029225P1;Description=precursor of CEP16-like;Ontology_term=GO:0016020
OE9A058020	2539.86	3.88694	0.228723	16.9941	9.0847e-65	3.00204e-61	ID=OE9A058020T1;Parent=OE9A058020;Name=OE9A058020T1;product=OE9A058020P1;Description=universal stress A;Ontology_term=GO:0005773%2C GO:0006950
OE9A079271	3.85611	3.87858	1.19866	3.23577	0.00121314	0.00793236	ID=OE9A079271T1;Parent=OE9A079271;Name=OE9A079271T1;product=OE9A079271P1
OE9A093242	28.5988	3.84187	0.521845	7.36208	1.81062e-13	8.22431e-12	ID=OE9A093242T1;Parent=OE9A093242;Name=OE9A093242T1;product=OE9A093242P1;Description=NRT1 PTR FAMILY -like;Ontology_term=GO:0005215%2C GO:0006810%2C GO:0016021
OE9A119429	29.0411	3.83811	0.932854	4.11437	3.8823e-05	0.000399038	ID=OE9A119429T1;Parent=OE9A119429;Name=OE9A119429T1;product=OE9A119429P1;Description=premnaspirodiene oxygenase-like;Ontology_term=GO:0005506%2C GO:0016020%2C GO:0016705%2C GO:0020037%2C GO:0055114
OE9A058913	19.5708	3.82628	0.667294	5.73402	9.80777e-09	2.13047e-07	ID=OE9A058913T1;Parent=OE9A058913;Name=OE9A058913T1;product=OE9A058913P1;Description=2-methylene-furan-3-one reductase-like;Ontology_term=GO:0003960%2C GO:0006118%2C GO:0008270%2C GO:0009570%2C GO:0009579%2C GO:0009941%2C GO:0010319%2C GO:0035671%2C GO:0035798%2C GO:0042558%2C GO:0048046%2C GO:0055114
OE9A013958	9.82174	3.80559	0.700762	5.43065	5.61492e-08	1.07097e-06	ID=OE9A013958T1;Parent=OE9A013958;Name=OE9A013958T1;product=OE9A013958P1;Description=secoisolariciresinol dehydrogenase-like;Ontology_term=GO:0016491%2C GO:0055114
OE9A088424	3.6918	3.79813	1.31398	2.89055	0.00384567	0.0205714	ID=OE9A088424T1;Parent=OE9A088424;Name=OE9A088424T1;product=OE9A088424P1;Description=RING-H2 finger ATL21A;Ontology_term=GO:0005515%2C GO:0008270
OE9A078255	44.6224	3.77018	1.26867	2.97175	0.00296104	0.0167075	ID=OE9A078255T1;Parent=OE9A078255;Name=OE9A078255T1;product=OE9A078255P1;Description=(-)-isopiperitenol (-)-carveol dehydrogenase, mitochondrial-like;Ontology_term=GO:0016491
OE9A036310	451.576	3.75012	0.284631	13.1754	1.21612e-39	6.30378e-37	ID=OE9A036310T1;Parent=OE9A036310;Name=OE9A036310T1;product=OE9A036310P1;Description=auxin-binding ABP19a-like;Ontology_term=GO:0005618%2C GO:0009734%2C GO:0030145%2C GO:0045735%2C GO:0048046
OE9A011623	5.33371	3.74697	1.16091	3.22761	0.00124829	0.00811603	ID=OE9A011623T1;Parent=OE9A011623;Name=OE9A011623T1;product=OE9A011623P1;Description=uncharacterized protein LOC111367851;Ontology_term=GO:0004650%2C GO:0005982%2C GO:0005985
OE9A048790	8.02645	3.72571	1.00449	3.70907	0.000208023	0.00174637	ID=OE9A048790T1;Parent=OE9A048790;Name=OE9A048790T1;product=OE9A048790P1;Description=cyclic nucleotide-gated ion channel 8;Ontology_term=GO:0005249%2C GO:0005515%2C GO:0008076%2C GO:0042391%2C GO:0071805
OE9A044326	256.02	3.71046	0.205262	18.0767	4.86479e-73	2.14343e-69	ID=OE9A044326T1;Parent=OE9A044326;Name=OE9A044326T1;product=OE9A044326P1
OE9A044699	267.328	3.69697	0.32624	11.3321	9.10367e-30	2.16815e-27	ID=OE9A044699T1;Parent=OE9A044699;Name=OE9A044699T1;product=OE9A044699P1;Description=auxin-binding ABP19a-like;Ontology_term=GO:0005618%2C GO:0009734%2C GO:0030145%2C GO:0045735%2C GO:0048046
OE9A073655	5.54644	3.6902	1.10829	3.32964	0.000869575	0.00598492	ID=OE9A073655T1;Parent=OE9A073655;Name=OE9A073655T1;product=OE9A073655P1;Description=pleiotropic drug resistance 1;Ontology_term=GO:0005524%2C GO:0005886%2C GO:0016021%2C GO:0042626%2C GO:0055085
OE9A092069	4.03985	3.66724	1.38926	2.63971	0.00829777	0.038196	ID=OE9A092069T1;Parent=OE9A092069;Name=OE9A092069T1;product=OE9A092069P1;Description=nudix hydrolase 8-like;Ontology_term=GO:0016787
OE9A097179	8.44294	3.66528	0.872005	4.20328	2.63072e-05	0.000282936	ID=OE9A097179T1;Parent=OE9A097179;Name=OE9A097179T1;product=OE9A097179P1;Description=transcription factor MYB12-like;Ontology_term=GO:0003677
OE9A021028	26.9184	3.66446	1.00142	3.65928	0.000252927	0.00206243	ID=OE9A021028T1;Parent=OE9A021028;Name=OE9A021028T1;product=OE9A021028P1;Description=isoprene synthase, chloroplastic-like;Ontology_term=GO:0000287%2C GO:0008152%2C GO:0010333
OE9A057034	453.094	3.6605	0.292997	12.4933	8.12364e-36	2.98273e-33	ID=OE9A057034T1;Parent=OE9A057034;Name=OE9A057034T1;product=OE9A057034P1;Description=(-)-isopiperitenol (-)-carveol dehydrogenase, mitochondrial-like;Ontology_term=GO:0016491
OE9A050999	454.152	3.65808	0.191669	19.0854	3.34075e-81	1.76632e-77	ID=OE9A050999T1;Parent=OE9A050999;Name=OE9A050999T1;product=OE9A050999P1
OE9A078047	77.272	3.65554	0.358795	10.1884	2.23475e-24	3.51653e-22	ID=OE9A078047T1;Parent=OE9A078047;Name=OE9A078047T1;product=OE9A078047P1;Description=kinase TMKL1;Ontology_term=GO:0004672%2C GO:0005524%2C GO:0006468%2C GO:0016021
OE9A039829	41.2336	3.6517	0.495487	7.36993	1.70719e-13	7.78125e-12	ID=OE9A039829T1;Parent=OE9A039829;Name=OE9A039829T1;product=OE9A039829P1;Description=2-methylene-furan-3-one reductase-like;Ontology_term=GO:0003960%2C GO:0006118%2C GO:0008270%2C GO:0009570%2C GO:0009579%2C GO:0009941%2C GO:0010319%2C GO:0035671%2C GO:0035798%2C GO:0042558%2C GO:0048046%2C GO:0055114
OE9A090970	11.2135	3.65077	0.701383	5.2051	1.93893e-07	3.34144e-06	ID=OE9A090970T1;Parent=OE9A090970;Name=OE9A090970T1;product=OE9A090970P1;Description=receptor kinase At3g47110;Ontology_term=GO:0004672%2C GO:0005515%2C GO:0005524%2C GO:0006468
OE9A043019	6.70419	3.64911	1.31269	2.77987	0.00543802	0.0271193	ID=OE9A043019T1;Parent=OE9A043019;Name=OE9A043019T1;product=OE9A043019P1;Description=LURP-one-related 10-like;Ontology_term=GO:0006952
OE9A055031	11.9694	3.63949	0.787246	4.62307	3.78111e-06	5.01174e-05	ID=OE9A055031T1;Parent=OE9A055031;Name=OE9A055031T1;product=OE9A055031P1;Description=heat stress transcription factor A-7a-like;Ontology_term=GO:0003700%2C GO:0005634%2C GO:0005667%2C GO:0006355%2C GO:0043565%2C GO:0045449
OE9A119813	17.3021	3.62649	0.61818	5.86641	4.45345e-09	1.02197e-07	ID=OE9A119813T1;Parent=OE9A119813;Name=OE9A119813T1;product=OE9A119813P1
OE9A092969	5.11696	3.60143	1.08353	3.3238	0.000888002	0.00608166	ID=OE9A092969T1;Parent=OE9A092969;Name=OE9A092969T1;product=OE9A092969P1;Description=probable leucine-rich repeat receptor kinase At1g68400;Ontology_term=GO:0004672%2C GO:0005524%2C GO:0006468%2C GO:0016020
OE9A026747	8.50515	3.58272	1.30802	2.73903	0.00616199	0.0300107	ID=OE9A026747T1;Parent=OE9A026747;Name=OE9A026747T1;product=OE9A026747P1;Description=patatin 2;Ontology_term=GO:0004620%2C GO:0005737%2C GO:0009395%2C GO:0016020%2C GO:0046486%2C GO:0047372
OE9A106306	4.47668	3.57716	1.35947	2.63128	0.00850632	0.0390066	ID=OE9A106306T1;Parent=OE9A106306;Name=OE9A106306T1;product=OE9A106306P1;Description=DETOXIFICATION 16;Ontology_term=GO:0006855%2C GO:0015238%2C GO:0015297%2C GO:0016021
OE9A015988	329.551	3.57572	0.717913	4.98071	6.33515e-07	9.93334e-06	ID=OE9A015988T1;Parent=OE9A015988;Name=OE9A015988T1;product=OE9A015988P1;Description=mitochondrial phosphate carrier 3, mitochondrial-like;Ontology_term=GO:0006810%2C GO:0016021
OE9A093088	5.73029	3.57056	1.06459	3.35392	0.000796744	0.00552972	ID=OE9A093088T1;Parent=OE9A093088;Name=OE9A093088T1;product=OE9A093088P1;Description=mavicyanin-like;Ontology_term=GO:0006118%2C GO:0009055%2C GO:0046658
OE9A099553	8.38934	3.56156	1.38835	2.56533	0.0103079	0.0452507	ID=OE9A099553T1;Parent=OE9A099553;Name=OE9A099553T1;product=OE9A099553P1;Description=transcription factor HHO3-like;Ontology_term=GO:0003677
OE9A024616	26.1986	3.54936	0.48941	7.25233	4.09665e-13	1.77539e-11	ID=OE9A024616T1;Parent=OE9A024616;Name=OE9A024616T1;product=OE9A024616P1
OE9A055862	11.9286	3.54552	1.24464	2.84862	0.00439096	0.0228503	ID=OE9A055862T1;Parent=OE9A055862;Name=OE9A055862T1;product=OE9A055862P1;Description=Apoptotic ATPase;Ontology_term=GO:0043531
OE9A030465	4.21884	3.54115	1.42662	2.4822	0.0130575	0.0542932	ID=OE9A030465T1;Parent=OE9A030465;Name=OE9A030465T1;product=OE9A030465P1;Description=plastid transcriptionally active 16, chloroplastic;Ontology_term=GO:0009295%2C GO:0009534%2C GO:0016020
OE9A080925	3.9784	3.5408	1.11123	3.18638	0.00144064	0.00914181	ID=OE9A080925T1;Parent=OE9A080925;Name=OE9A080925T1;product=OE9A080925P1;Description=uncharacterized protein LOC111397550 isoform X2;Ontology_term=GO:0003676%2C GO:0046983
OE9A049789	18.9831	3.52257	0.601917	5.85226	4.84931e-09	1.09851e-07	ID=OE9A049789T1;Parent=OE9A049789;Name=OE9A049789T1;product=OE9A049789P1;Description=secoisolariciresinol dehydrogenase-like;Ontology_term=GO:0016491%2C GO:0055114
OE9A096329	21.4008	3.521	0.911552	3.86264	0.000112168	0.00102389	ID=OE9A096329T1;Parent=OE9A096329;Name=OE9A096329T1;product=OE9A096329P1;Description=lysine histidine transporter 1-like;Ontology_term=GO:0016021
OE9A119110	11.3843	3.51874	1.12845	3.11819	0.00181966	0.0111147	ID=OE9A119110T2;Parent=OE9A119110;Name=OE9A119110T2;product=OE9A119110P2
OE9A069837	13.2915	3.51873	0.566347	6.21302	5.19768e-10	1.41219e-08	ID=OE9A069837T1;Parent=OE9A069837;Name=OE9A069837T1;product=OE9A069837P1
OE9A062506	3.48057	3.51702	1.44559	2.43293	0.0149772	0.0604855	ID=OE9A062506T1;Parent=OE9A062506;Name=OE9A062506T1;product=OE9A062506P1;Description=serine threonine- kinase isoform X1;Ontology_term=GO:0004672%2C GO:0005524%2C GO:0006468
OE9A050526	90.019	3.49678	1.02714	3.40438	0.000663141	0.00472656	ID=OE9A050526T1;Parent=OE9A050526;Name=OE9A050526T1;product=OE9A050526P1;Description=vetispiradiene synthase 2-like;Ontology_term=GO:0000287%2C GO:0008152%2C GO:0010333
OE9A006455	304.619	3.48972	0.473723	7.36657	1.75071e-13	7.96589e-12	ID=OE9A006455T1;Parent=OE9A006455;Name=OE9A006455T1;product=OE9A006455P1;Description=trans-alpha-bergamotene synthase-like;Ontology_term=GO:0000287%2C GO:0010334%2C GO:0016114%2C GO:0045339%2C GO:1901940
OE9A115485	24.3511	3.48068	0.654133	5.32106	1.03163e-07	1.88213e-06	ID=OE9A115485T1;Parent=OE9A115485;Name=OE9A115485T1;product=OE9A115485P1;Description=probably inactive leucine-rich repeat receptor kinase At5g06940;Ontology_term=GO:0004672%2C GO:0005515%2C GO:0005524%2C GO:0006468%2C GO:0016021
OE9A087470	8.31249	3.44081	1.26902	2.7114	0.0066999	0.0321333	ID=OE9A087470T1;Parent=OE9A087470;Name=OE9A087470T1;product=OE9A087470P1
OE9A056336	62.7441	3.42892	0.327508	10.4697	1.18958e-25	2.08262e-23	ID=OE9A056336T1;Parent=OE9A056336;Name=OE9A056336T1;product=OE9A056336P1
OE9A101007	27.671	3.42514	0.911645	3.7571	0.000171895	0.00148069	ID=OE9A101007T1;Parent=OE9A101007;Name=OE9A101007T1;product=OE9A101007P1;Description=vetispiradiene synthase 2-like;Ontology_term=GO:0000287%2C GO:0008152%2C GO:0010333
OE9A081538	28.8616	3.4083	0.524725	6.49539	8.28188e-11	2.57274e-09	ID=OE9A081538T1;Parent=OE9A081538;Name=OE9A081538T1;product=OE9A081538P1;Description=metallothiol transferase -like;Ontology_term=GO:0016829
OE9A021039	124.65	3.40218	0.398782	8.53143	1.44556e-17	1.09498e-15	ID=OE9A021039T1;Parent=OE9A021039;Name=OE9A021039T1;product=OE9A021039P1;Description=transcription factor HBP-1b(c38)-like;Ontology_term=GO:0006351%2C GO:0043565
OE9A014613	5.43345	3.39893	1.22773	2.76846	0.00563212	0.0279188	ID=OE9A014613T1;Parent=OE9A014613;Name=OE9A014613T1;product=OE9A014613P1;Description=haloacid dehalogenase-like hydrolase domain-containing Sgpp;Ontology_term=GO:0008152%2C GO:0016787
OE9A023080	4.71498	3.39814	1.0297	3.30012	0.000966425	0.00652744	ID=OE9A023080T1;Parent=OE9A023080;Name=OE9A023080T1;product=OE9A023080P1
OE9A087037	84.4673	3.39763	0.91361	3.7189	0.000200091	0.00169051	ID=OE9A087037T1;Parent=OE9A087037;Name=OE9A087037T1;product=OE9A087037P1;Description=glutamate receptor -like;Ontology_term=GO:0004970%2C GO:0006811%2C GO:0007165%2C GO:0007268%2C GO:0016020
OE9A059735	44.6895	3.39322	0.889631	3.81419	0.00013663	0.00121491	ID=OE9A059735T1;Parent=OE9A059735;Name=OE9A059735T1;product=OE9A059735P1
OE9A057882	409.076	3.38503	0.304493	11.1169	1.03796e-28	2.38604e-26	ID=OE9A057882T1;Parent=OE9A057882;Name=OE9A057882T1;product=OE9A057882P1;Description=beta-glucosidase-like;Ontology_term=GO:0005975%2C GO:0006952%2C GO:0008422%2C GO:0102483
OE9A070493	8.73557	3.37748	0.93154	3.62569	0.000288189	0.00231146	ID=OE9A070493T1;Parent=OE9A070493;Name=OE9A070493T1;product=OE9A070493P1;Description=nudix hydrolase 17, mitochondrial-like;Ontology_term=GO:0016787
OE9A064110	4.98348	3.3723	1.02211	3.29934	0.000969137	0.00654241	ID=OE9A064110T1;Parent=OE9A064110;Name=OE9A064110T1;product=OE9A064110P1
OE9A077229	71.9004	3.37067	1.08785	3.09846	0.00194527	0.0117409	ID=OE9A077229T1;Parent=OE9A077229;Name=OE9A077229T1;product=OE9A077229P1;Description=vetispiradiene synthase 2-like;Ontology_term=GO:0000287%2C GO:0008152%2C GO:0010333
OE9A103732	3.65477	3.36403	1.21172	2.77626	0.00549888	0.0273661	ID=OE9A103732T1;Parent=OE9A103732;Name=OE9A103732T1;product=OE9A103732P1
OE9A097772	3.37204	3.35949	1.48239	2.26626	0.0234355	0.0857023	ID=OE9A097772T1;Parent=OE9A097772;Name=OE9A097772T1;product=OE9A097772P1;Description=Pectinesterase inhibitor domain containing;Ontology_term=GO:0005618%2C GO:0005982%2C GO:0005985%2C GO:0030599%2C GO:0042545
OE9A106861	4.93209	3.34832	1.31437	2.54747	0.0108508	0.047136	ID=OE9A106861T1;Parent=OE9A106861;Name=OE9A106861T1;product=OE9A106861P1;Description=heavy metal-associated isoprenylated plant 3-like isoform X1;Ontology_term=GO:0030001%2C GO:0046872
OE9A004824	12.9649	3.33309	1.03742	3.21286	0.00131421	0.00847173	ID=OE9A004824T1;Parent=OE9A004824;Name=OE9A004824T1;product=OE9A004824P1;Description=Isopenicillin N synthase;Ontology_term=GO:0005506%2C GO:0016491%2C GO:0055114
OE9A028052	3.96088	3.32987	1.00658	3.30811	0.00093929	0.00637916	ID=OE9A028052T1;Parent=OE9A028052;Name=OE9A028052T1;product=OE9A028052P1;md5=58b0bcfcf77aa375c283f9a44c2d168d;INTERPRO=<table><tr><th>DB</th><th>ID</th><th>Description</th></tr><tr><td>Gene3D</td><td>G3DSA:1.10.510.10</td><td></td></tr><tr><td>Gene3D</td><td>G3DSA:2.10.25.10</td><td></td></tr><tr><td>Gene3D</td><td>G3DSA:2.40.155.10</td><td></td></tr><tr><td>Gene3D</td><td>G3DSA:2.60.120.200</td>…
OE9A102306	36.9067	3.3223	1.04201	3.18834	0.00143091	0.00908879	ID=OE9A102306T1;Parent=OE9A102306;Name=OE9A102306T1;product=OE9A102306P1;Description=ethylene-responsive transcription factor ERF096-like;Ontology_term=GO:0003677%2C GO:0003700%2C GO:0005634%2C GO:0005667%2C GO:0006355%2C GO:0045449
OE9A051220	29.2494	3.31036	0.540345	6.12639	8.98973e-10	2.36706e-08	ID=OE9A051220T1;Parent=OE9A051220;Name=OE9A051220T1;product=OE9A051220P1;md5=e5f318160a399fd2985f1beb614b247e;INTERPRO=<table><tr><th>DB</th><th>ID</th><th>Description</th></tr><tr><td>Gene3D</td><td>G3DSA:3.80.10.10</td><td></td></tr><tr><td>PANTHER</td><td>PTHR27000</td><td></td></tr><tr><td>PANTHER</td><td>PTHR27000:SF31</td><td></td></tr><tr><td>Pfam</td><td>PF08263</td><td>Leucine rich repea…
OE9A111009	33.3105	3.30602	1.06886	3.09304	0.00198115	0.0119275	ID=OE9A111009T1;Parent=OE9A111009;Name=OE9A111009T1;product=OE9A111009P1
OE9A029265	5.86652	3.28941	1.34757	2.44099	0.0146472	0.0594067	ID=OE9A029265T1;Parent=OE9A029265;Name=OE9A029265T1;product=OE9A029265P1;Description=serine threonine- kinase tricorner;Ontology_term=GO:0004672%2C GO:0005524%2C GO:0006468
OE9A114241	162.439	3.26089	0.323912	10.0672	7.71435e-24	1.14571e-21	ID=OE9A114241T1;Parent=OE9A114241;Name=OE9A114241T1;product=OE9A114241P1
OE9A002015	27.4955	3.25636	1.02422	3.17936	0.001476	0.00934152	ID=OE9A002015T1;Parent=OE9A002015;Name=OE9A002015T1;product=OE9A002015P1;Description=basic 7S globulin-like;Ontology_term=GO:0008233%2C GO:0019538
OE9A038122	18.6239	3.24955	0.735285	4.41944	9.8956e-06	0.000118747	ID=OE9A038122T1;Parent=OE9A038122;Name=OE9A038122T1;product=OE9A038122P1
OE9A093507	3.83074	3.24666	1.37416	2.36266	0.0181442	0.070352	ID=OE9A093507T1;Parent=OE9A093507;Name=OE9A093507T1;product=OE9A093507P1;Description=CELLULOSE SYNTHASE INTERACTIVE 1 isoform X1;Ontology_term=GO:0005515
OE9A103328	837.495	3.23838	0.6577	4.92379	8.48825e-07	1.28688e-05	ID=OE9A103328T1;Parent=OE9A103328;Name=OE9A103328T1;product=OE9A103328P1;Description=21 kDa;Ontology_term=GO:0004857%2C GO:0043086
OE9A067434	153.255	3.23746	0.279386	11.5878	4.75437e-31	1.25687e-28	ID=OE9A067434T2;Parent=OE9A067434;Name=OE9A067434T2;product=OE9A067434P2;Description=70 kDa peptidyl-prolyl isomerase-like;Ontology_term=GO:0000413%2C GO:0003755%2C GO:0005515%2C GO:0005528%2C GO:0005789%2C GO:0061077
OE9A049515	6.49295	3.22658	0.929713	3.47052	0.00051946	0.00381033	ID=OE9A049515T1;Parent=OE9A049515;Name=OE9A049515T1;product=OE9A049515P1;Description=2-methylene-furan-3-one reductase-like;Ontology_term=GO:0008270%2C GO:0009570%2C GO:0009579%2C GO:0009941%2C GO:0010319%2C GO:0035671%2C GO:0035798%2C GO:0042558%2C GO:0048046%2C GO:0055114
OE9A049201	13.7724	3.21926	0.67808	4.74762	2.05827e-06	2.88507e-05	ID=OE9A049201T1;Parent=OE9A049201;Name=OE9A049201T1;product=OE9A049201P1;Description=WD40 repeat-containing HOS15-like;Ontology_term=GO:0005515
OE9A013383	20.3873	3.21452	0.579362	5.54838	2.88334e-08	5.77018e-07	ID=OE9A013383T1;Parent=OE9A013383;Name=OE9A013383T1;product=OE9A013383P1;Description=LRR receptor-like serine threonine- kinase GSO1;Ontology_term=GO:0005515
OE9A033614	3.97631	3.21226	1.07587	2.98574	0.00282897	0.0160694	ID=OE9A033614T1;Parent=OE9A033614;Name=OE9A033614T1;product=OE9A033614P1;Description=beta-D-glucosyl crocetin beta-1,6-glucosyltransferase-like;Ontology_term=GO:0008152%2C GO:0016758
OE9A076753	101.289	3.20709	0.928183	3.45523	0.000549817	0.00400361	ID=OE9A076753T1;Parent=OE9A076753;Name=OE9A076753T1;product=OE9A076753P1;Description=exocyst complex component EXO70A1-like;Ontology_term=GO:0000145%2C GO:0006887
OE9A067989	6.35031	3.20372	1.39393	2.29834	0.0215424	0.0801429	ID=OE9A067989T1;Parent=OE9A067989;Name=OE9A067989T1;product=OE9A067989P1;Description=heparanase 3;Ontology_term=GO:0005975%2C GO:0009505%2C GO:0016020%2C GO:0016798
OE9A011091	7.03611	3.20276	1.01167	3.16581	0.00154651	0.00972258	ID=OE9A011091T1;Parent=OE9A011091;Name=OE9A011091T1;product=OE9A011091P1;Description=mediator of RNA polymerase II transcription subunit 33A;Ontology_term=GO:0016021%2C GO:0016592%2C GO:2000762
OE9A076388	21.0275	3.19963	0.517113	6.18749	6.1131e-10	1.64401e-08	ID=OE9A076388T1;Parent=OE9A076388;Name=OE9A076388T1;product=OE9A076388P1;Description=serine threonine- kinase SAPK10;Ontology_term=GO:0004674%2C GO:0005524%2C GO:0006468%2C GO:0009069
OE9A034245	802.514	3.19284	0.156639	20.3834	2.34552e-92	2.06687e-88	ID=OE9A034245T1;Parent=OE9A034245;Name=OE9A034245T1;product=OE9A034245P1;Description=pentatricopeptide repeat-containing At3g09650, chloroplastic;Ontology_term=GO:0003729%2C GO:0005515%2C GO:0006397%2C GO:0009570
OE9A084432	62.1152	3.18672	0.465894	6.84	7.91937e-12	2.8837e-10	ID=OE9A084432T1;Parent=OE9A084432;Name=OE9A084432T1;product=OE9A084432P1
OE9A083065	3.4706	3.18667	1.13844	2.79916	0.0051235	0.0257892	ID=OE9A083065T1;Parent=OE9A083065;Name=OE9A083065T1;product=OE9A083065P1
OE9A104652	7.3293	3.17668	1.33707	2.37585	0.0175085	0.0684696	ID=OE9A104652T1;Parent=OE9A104652;Name=OE9A104652T1;product=OE9A104652P1;Description=calcium-transporting ATPase 13, plasma membrane-type;Ontology_term=GO:0005488%2C GO:0016021
OE9A028472	3.77511	3.17562	1.03248	3.07571	0.00210001	0.0125205	ID=OE9A028472T1;Parent=OE9A028472;Name=OE9A028472T1;product=OE9A028472P1;Description=UDP-glycosyltransferase 83A1-like;Ontology_term=GO:0009812%2C GO:0035251
OE9A106469	21.1819	3.16843	1.12789	2.80918	0.00496683	0.025125	ID=OE9A106469T1;Parent=OE9A106469;Name=OE9A106469T1;product=OE9A106469P1
OE9A039024	8.08301	3.16362	1.14815	2.75541	0.0058618	0.0288399	ID=OE9A039024T1;Parent=OE9A039024;Name=OE9A039024T1;product=OE9A039024P1;Description=DOG1-like 3;Ontology_term=GO:0006351%2C GO:0043565
OE9A053315	99.6163	3.16237	1.0286	3.07444	0.00210895	0.0125653	ID=OE9A053315T1;Parent=OE9A053315;Name=OE9A053315T1;product=OE9A053315P1;Description=expansin-B15-like;Ontology_term=GO:0005576%2C GO:0016021%2C GO:0019953
OE9A070505	33.6697	3.15809	0.63446	4.9776	6.43783e-07	1.00585e-05	ID=OE9A070505T1;Parent=OE9A070505;Name=OE9A070505T1;product=OE9A070505P1;Description=high affinity nitrate transporter -like;Ontology_term=GO:0016021%2C GO:0055085
OE9A119264	134.003	3.1559	1.16369	2.71198	0.0066883	0.0320951	ID=OE9A119264T1;Parent=OE9A119264;Name=OE9A119264T1;product=OE9A119264P1;Description=Vacuolar cation proton exchanger 3;Ontology_term=GO:0006885%2C GO:0015369%2C GO:0016021%2C GO:0070588
OE9A013634	5.8399	3.15237	1.28846	2.44662	0.0144203	0.0587026	ID=OE9A013634T1;Parent=OE9A013634;Name=OE9A013634T1;product=OE9A013634P1;Description=thaumatin;Ontology_term=GO:0005515%2C GO:0005576%2C GO:0031640%2C GO:0050832
OE9A038210	3.76972	3.15114	1.29447	2.43431	0.0149201	0.0602918	ID=OE9A038210T1;Parent=OE9A038210;Name=OE9A038210T1;product=OE9A038210P1
OE9A039171	89.0479	3.12673	0.428007	7.30533	2.7658e-13	1.22269e-11	ID=OE9A039171T1;Parent=OE9A039171;Name=OE9A039171T1;product=OE9A039171P1;Description=(-)-germacrene D synthase;Ontology_term=GO:0000287%2C GO:0008152%2C GO:0010333
OE9A102810	30.8476	3.12313	0.494204	6.31951	2.62389e-10	7.49085e-09	ID=OE9A102810T1;Parent=OE9A102810;Name=OE9A102810T1;product=OE9A102810P1;Description=tubulin alpha-3 chain;Ontology_term=GO:0003924%2C GO:0005200%2C GO:0005525%2C GO:0005737%2C GO:0005874%2C GO:0007017
OE9A101017	224.881	3.12229	0.645068	4.84025	1.29676e-06	1.89608e-05	ID=OE9A101017T1;Parent=OE9A101017;Name=OE9A101017T1;product=OE9A101017P1;Description=receptor kinase HAIKU2;Ontology_term=GO:0004674%2C GO:0005515%2C GO:0005524%2C GO:0006468%2C GO:0009069%2C GO:0016021
OE9A088075	9.21348	3.11836	0.841063	3.70764	0.0002092	0.00175346	ID=OE9A088075T1;Parent=OE9A088075;Name=OE9A088075T1;product=OE9A088075P1;Description=ankyrin repeat-containing BDA1-like;Ontology_term=GO:0016020
OE9A076410	4.17091	3.10547	1.41094	2.20099	0.0277366	0.097286	ID=OE9A076410T1;Parent=OE9A076410;Name=OE9A076410T1;product=OE9A076410P1;Description=unnamed protein product;Ontology_term=GO:0016021
OE9A061639	741.592	3.10231	0.350424	8.85303	8.51784e-19	7.68525e-17	ID=OE9A061639T1;Parent=OE9A061639;Name=OE9A061639T1;product=OE9A061639P1;Description=zinc finger CONSTANS-LIKE 16-like;Ontology_term=GO:0005515%2C GO:0005622%2C GO:0008270
OE9A050819	192.297	3.09269	0.37362	8.27765	1.25634e-16	8.24135e-15	ID=OE9A050819T1;Parent=OE9A050819;Name=OE9A050819T1;product=OE9A050819P1;Description=high-affinity nitrate transporter -like;Ontology_term=GO:0010167%2C GO:0015706%2C GO:0016021
OE9A100065	115.471	3.08581	0.566875	5.44354	5.22305e-08	1.00346e-06	ID=OE9A100065T1;Parent=OE9A100065;Name=OE9A100065T1;product=OE9A100065P1;Description=probable L-type lectin-domain containing receptor kinase;Ontology_term=GO:0004674%2C GO:0004714%2C GO:0005524%2C GO:0007169%2C GO:0009069%2C GO:0016021%2C GO:0018108%2C GO:0030246
OE9A069039	67.2917	3.08206	0.371792	8.28975	1.1349e-16	7.57635e-15	ID=OE9A069039T1;Parent=OE9A069039;Name=OE9A069039T1;product=OE9A069039P1;Description=wall-associated receptor kinase-like 8;Ontology_term=GO:0004672%2C GO:0005509%2C GO:0005515%2C GO:0005524%2C GO:0006468%2C GO:0016020
OE9A059014	114.572	3.08081	0.548247	5.61938	1.91645e-08	3.96116e-07	ID=OE9A059014T1;Parent=OE9A059014;Name=OE9A059014T1;product=OE9A059014P1;Description=secoisolariciresinol dehydrogenase-like;Ontology_term=GO:0016491
OE9A048258	22.1467	3.07917	0.410761	7.49625	6.56671e-14	3.16784e-12	ID=OE9A048258T1;Parent=OE9A048258;Name=OE9A048258T1;product=OE9A048258P1;Description=tubulin beta-5 chain;Ontology_term=GO:0003924%2C GO:0005200%2C GO:0005525%2C GO:0005737%2C GO:0005874%2C GO:0007017
OE9A061624	2492.28	3.06408	0.321941	9.51753	1.77351e-21	2.09306e-19	ID=OE9A061624T1;Parent=OE9A061624;Name=OE9A061624T1;product=OE9A061624P1;Description=beta-glucosidase-like;Ontology_term=GO:0005975%2C GO:0008422
OE9A080568	134.048	3.05566	0.4447	6.87128	6.36275e-12	2.34596e-10	ID=OE9A080568T1;Parent=OE9A080568;Name=OE9A080568T1;product=OE9A080568P1;Description=siroheme synthase-like;Ontology_term=GO:0004851%2C GO:0009507%2C GO:0015994%2C GO:0019354%2C GO:0032259%2C GO:0055114
OE9A089528	11.55	3.05457	1.14838	2.65989	0.00781658	0.0364111	ID=OE9A089528T1;Parent=OE9A089528;Name=OE9A089528T1;product=OE9A089528P1;Description=late embryogenesis abundant At1g64065-like;Ontology_term=GO:0016021
OE9A046394	35.4171	3.04633	0.329625	9.24181	2.42364e-20	2.60452e-18	ID=OE9A046394T1;Parent=OE9A046394;Name=OE9A046394T1;product=OE9A046394P1
OE9A115499	12.1494	3.04226	1.17372	2.59197	0.00954268	0.0425935	ID=OE9A115499T1;Parent=OE9A115499;Name=OE9A115499T1;product=OE9A115499P1;Description=ethylene-responsive transcription factor 1B-like;Ontology_term=GO:0003677%2C GO:0003700%2C GO:0005667%2C GO:0006355%2C GO:0045449
OE9A074395	4.62501	3.04207	0.876343	3.47133	0.000517895	0.00380413	ID=OE9A074395T1;Parent=OE9A074395;Name=OE9A074395T1;product=OE9A074395P1;Description=sucrose-phosphatase 1 isoform X1;Ontology_term=GO:0000287%2C GO:0005982%2C GO:0005986%2C GO:0016311%2C GO:0050307
OE9A008723	7.59212	3.03833	0.867655	3.50177	0.000462174	0.00347103	ID=OE9A008723T1;Parent=OE9A008723;Name=OE9A008723T1;product=OE9A008723P1;Description=NRT1 PTR FAMILY -like;Ontology_term=GO:0005215%2C GO:0006857%2C GO:0016021
OE9A050725	14.4818	3.03714	1.20508	2.52028	0.0117262	0.0500392	ID=OE9A050725T1;Parent=OE9A050725;Name=OE9A050725T1;product=OE9A050725P1
OE9A112021	26.3689	3.03626	0.642844	4.72317	2.32199e-06	3.21047e-05	ID=OE9A112021T1;Parent=OE9A112021;Name=OE9A112021T1;product=OE9A112021P1;Description=ATP-dependent 6-phosphofructokinase 3-like;Ontology_term=GO:0003872%2C GO:0005524%2C GO:0005945%2C GO:0006000%2C GO:0006002%2C GO:0006012%2C GO:0006013%2C GO:0006094%2C GO:0006098%2C GO:0046872%2C GO:0061615
OE9A048767	10.8001	3.03191	1.06635	2.84325	0.0044656	0.0231235	ID=OE9A048767T1;Parent=OE9A048767;Name=OE9A048767T1;product=OE9A048767P1;Description=crocetin glucosyltransferase, chloroplastic-like;Ontology_term=GO:0005215%2C GO:0006810%2C GO:0008152%2C GO:0016020%2C GO:0016758
OE9A094557	213.889	3.02638	0.234089	12.9283	3.11442e-38	1.34972e-35	ID=OE9A094557T1;Parent=OE9A094557;Name=OE9A094557T1;product=OE9A094557P1;Description=NAC domain-containing 35;Ontology_term=GO:0003677%2C GO:0005634%2C GO:0006355
OE9A107877	467.788	3.01843	0.35521	8.49761	1.93541e-17	1.44532e-15	ID=OE9A107877T1;Parent=OE9A107877;Name=OE9A107877T1;product=OE9A107877P1;Description=E3 ubiquitin- ligase MIEL1;Ontology_term=GO:0005515%2C GO:0008270%2C GO:1902456
OE9A047665	22.9203	3.00089	0.516459	5.81051	6.22845e-09	1.3895e-07	ID=OE9A047665T1;Parent=OE9A047665;Name=OE9A047665T1;product=OE9A047665P1;Description=cationic amino acid transporter 5;Ontology_term=GO:0005313%2C GO:0005887%2C GO:0015189%2C GO:0015297%2C GO:0043091%2C GO:0051938%2C GO:0089711%2C GO:1903401
OE9A062170	71.2712	2.99637	0.835226	3.5875	0.000333863	0.0026307	ID=OE9A062170T1;Parent=OE9A062170;Name=OE9A062170T1;product=OE9A062170P1;Description=berberine bridge enzyme-like 13;Ontology_term=GO:0016614%2C GO:0050660%2C GO:0055114
OE9A020879	48.1207	2.97709	0.384566	7.74143	9.83044e-15	5.25005e-13	ID=OE9A020879T1;Parent=OE9A020879;Name=OE9A020879T1;product=OE9A020879P1;Description=ethylene-responsive transcription factor ERF061;Ontology_term=GO:0003677%2C GO:0003700%2C GO:0005667%2C GO:0006355%2C GO:0045449
OE9A065231	79.7609	2.97286	0.442676	6.71566	1.87218e-11	6.3935e-10	ID=OE9A065231T1;Parent=OE9A065231;Name=OE9A065231T1;product=OE9A065231P1;Description=(-)-germacrene D synthase-like;Ontology_term=GO:0000287%2C GO:0010333
OE9A058733	28.9147	2.9682	0.589864	5.032	4.85387e-07	7.77208e-06	ID=OE9A058733T1;Parent=OE9A058733;Name=OE9A058733T1;product=OE9A058733P1;Description=STRICTOSIDINE SYNTHASE-LIKE 6-like;Ontology_term=GO:0005783%2C GO:0016021%2C GO:0016114%2C GO:0016788%2C GO:0016844%2C GO:0042432
OE9A064114	4.15837	2.96558	1.25981	2.35399	0.0185731	0.0716367	ID=OE9A064114T1;Parent=OE9A064114;Name=OE9A064114T1;product=OE9A064114P1;Description=calcium-transporting ATPase 12, plasma membrane-type-like;Ontology_term=GO:0000166%2C GO:0046872
OE9A008662	8.32727	2.95945	0.781409	3.78733	0.000152278	0.00133247	ID=OE9A008662T1;Parent=OE9A008662;Name=OE9A008662T1;product=OE9A008662P1
OE9A062732	6.62006	2.95493	0.879824	3.35855	0.000783538	0.00545526	ID=OE9A062732T1;Parent=OE9A062732;Name=OE9A062732T1;product=OE9A062732P1
OE9A113459	12.5987	2.95141	0.937701	3.1475	0.00164674	0.0102214	ID=OE9A113459T1;Parent=OE9A113459;Name=OE9A113459T1;product=OE9A113459P1;Description=probable LRR receptor-like serine threonine- kinase At1g07650 isoform X2;Ontology_term=GO:0004672%2C GO:0005524%2C GO:0006468%2C GO:0016021
OE9A086519	122.967	2.9436	0.324061	9.08346	1.05178e-19	1.05321e-17	ID=OE9A086519T1;Parent=OE9A086519;Name=OE9A086519T1;product=OE9A086519P1;Description=heat stress transcription factor A-7a-like;Ontology_term=GO:0003700%2C GO:0005634%2C GO:0005667%2C GO:0006355%2C GO:0043565%2C GO:0045449
OE9A121155	124.802	2.94357	0.884018	3.32976	0.000869212	0.00598398	ID=OE9A121155T1;Parent=OE9A121155;Name=OE9A121155T1;product=OE9A121155P1;Description=21 kDa -like;Ontology_term=GO:0004857%2C GO:0043086
OE9A103093	6.96491	2.94132	1.0747	2.73688	0.0062024	0.0301631	ID=OE9A103093T1;Parent=OE9A103093;Name=OE9A103093T1;product=OE9A103093P1;Description=tryptophan aminotransferase-related 4-like;Ontology_term=GO:0016021%2C GO:0016846
OE9A037097	110.802	2.93657	0.560533	5.23888	1.61551e-07	2.82458e-06	ID=OE9A037097T1;Parent=OE9A037097;Name=OE9A037097T1;product=OE9A037097P1;Description=secoisolariciresinol dehydrogenase-like;Ontology_term=GO:0016491
OE9A069970	12.6527	2.93566	0.702086	4.18134	2.89802e-05	0.000307679	ID=OE9A069970T1;Parent=OE9A069970;Name=OE9A069970T1;product=OE9A069970P1;Description=nac domain-containing 104;Ontology_term=GO:0003677%2C GO:0005634%2C GO:0006355
OE9A111628	18.7085	2.93498	0.504035	5.82298	5.78085e-09	1.29511e-07	ID=OE9A111628T1;Parent=OE9A111628;Name=OE9A111628T1;product=OE9A111628P1;Description=uncharacterized protein LOC111366985;Ontology_term=GO:0016020
OE9A009976	29.4545	2.92921	0.928559	3.15458	0.00160732	0.0100268	ID=OE9A009976T1;Parent=OE9A009976;Name=OE9A009976T1;product=OE9A009976P1
OE9A008605	9.5091	2.91912	1.02433	2.84978	0.00437497	0.022785	ID=OE9A008605T1;Parent=OE9A008605;Name=OE9A008605T1;product=OE9A008605P1;Description=heavy metal-associated isoprenylated plant 45;Ontology_term=GO:0030001%2C GO:0046872
OE9A084435	16.6624	2.91625	0.679769	4.29007	1.78618e-05	0.000200848	ID=OE9A084435T1;Parent=OE9A084435;Name=OE9A084435T1;product=OE9A084435P1;Description=(-)-germacrene D synthase;Ontology_term=GO:0000287%2C GO:0008152%2C GO:0010333
OE9A087555	12.2933	2.91043	1.13287	2.56907	0.0101972	0.0448689	ID=OE9A087555T1;Parent=OE9A087555;Name=OE9A087555T1;product=OE9A087555P1;Description=G-type lectin S-receptor-like serine threonine- kinase At4g27290 isoform X1;Ontology_term=GO:0004674%2C GO:0005524%2C GO:0006468%2C GO:0009069
OE9A040950	21.6211	2.90861	0.533775	5.44913	5.06158e-08	9.75276e-07	ID=OE9A040950T1;Parent=OE9A040950;Name=OE9A040950T1;product=OE9A040950P1;Description=axial regulator YABBY 4;Ontology_term=GO:0007275
OE9A099542	4.87162	2.90714	0.890077	3.26616	0.00109015	0.00723918	ID=OE9A099542T1;Parent=OE9A099542;Name=OE9A099542T1;product=OE9A099542P1
OE9A094198	61.0822	2.90465	0.432434	6.71697	1.85537e-11	6.34522e-10	ID=OE9A094198T1;Parent=OE9A094198;Name=OE9A094198T1;product=OE9A094198P1;Description=cytokinin dehydrogenase 5;Ontology_term=GO:0009690%2C GO:0016614%2C GO:0019139%2C GO:0050660%2C GO:0055114
OE9A033898	63.8964	2.88324	0.449033	6.42101	1.35375e-10	4.0438e-09	ID=OE9A033898T1;Parent=OE9A033898;Name=OE9A033898T1;product=OE9A033898P1;Description=AT-hook motif nuclear-localized 25-like;Ontology_term=GO:0005488
OE9A040037	12.0484	2.88074	0.88187	3.26663	0.00108835	0.0072329	ID=OE9A040037T1;Parent=OE9A040037;Name=OE9A040037T1;product=OE9A040037P1
OE9A008704	11.2925	2.87879	0.737687	3.90245	9.52236e-05	0.000887321	ID=OE9A008704T1;Parent=OE9A008704;Name=OE9A008704T1;product=OE9A008704P1
OE9A003494	293.178	2.87623	0.440466	6.52998	6.57783e-11	2.08142e-09	ID=OE9A003494T1;Parent=OE9A003494;Name=OE9A003494T1;product=OE9A003494P1;Description=NRT1 PTR FAMILY -like;Ontology_term=GO:0005215%2C GO:0006810%2C GO:0016021
OE9A110283	6.06451	2.87617	1.22543	2.34708	0.0189214	0.0726832	ID=OE9A110283T1;Parent=OE9A110283;Name=OE9A110283T1;product=OE9A110283P1
OE9A032517	5.78219	2.87288	1.29455	2.21922	0.0264718	0.0939719	ID=OE9A032517T1;Parent=OE9A032517;Name=OE9A032517T1;product=OE9A032517P1;Description=zinc finger ZAT11-like;Ontology_term=GO:0046872
OE9A037305	124.385	2.86916	0.296424	9.67926	3.69374e-22	4.60602e-20	ID=OE9A037305T1;Parent=OE9A037305;Name=OE9A037305T1;product=OE9A037305P1;Description=receptor kinase At3g47110;Ontology_term=GO:0004672%2C GO:0005515%2C GO:0005524%2C GO:0006468
OE9A101341	3.69677	2.86881	1.11043	2.58351	0.00978007	0.0434389	ID=OE9A101341T1;Parent=OE9A101341;Name=OE9A101341T1;product=OE9A101341P1;Description=transcription factor MYB3R-3-like isoform X1;Ontology_term=GO:0003677
OE9A068997	663.728	2.86373	0.230546	12.4215	1.99795e-35	7.23531e-33	ID=OE9A068997T1;Parent=OE9A068997;Name=OE9A068997T1;product=OE9A068997P1;Description=abscisic acid receptor PYL8;Ontology_term=GO:0004864%2C GO:0004872%2C GO:0005634%2C GO:0005737%2C GO:0009738%2C GO:0010427%2C GO:0043086%2C GO:0080163
OE9A095245	49.3711	2.861	0.628264	4.55381	5.26831e-06	6.75427e-05	ID=OE9A095245T1;Parent=OE9A095245;Name=OE9A095245T1;product=OE9A095245P1;Description=major allergen Pru ar 1-like;Ontology_term=GO:0006952%2C GO:0009607
OE9A040265	431.223	2.85283	0.209594	13.6113	3.4331e-42	2.26893e-39	ID=OE9A040265T1;Parent=OE9A040265;Name=OE9A040265T1;product=OE9A040265P1;Description=G-type lectin S-receptor-like serine threonine- kinase CES101;Ontology_term=GO:0004674%2C GO:0005524%2C GO:0005886%2C GO:0006468%2C GO:0006952%2C GO:0009069%2C GO:0009506
OE9A029993	288.608	2.85202	0.395157	7.21745	5.29721e-13	2.25503e-11	ID=OE9A029993T2;Parent=OE9A029993;Name=OE9A029993T2;product=OE9A029993P2;Description=siroheme synthase;Ontology_term=GO:0004851%2C GO:0009507%2C GO:0015994%2C GO:0019354%2C GO:0032259%2C GO:0055114
OE9A011583	198.493	2.84735	0.500748	5.6862	1.29897e-08	2.75661e-07	ID=OE9A011583T1;Parent=OE9A011583;Name=OE9A011583T1;product=OE9A011583P1;Description=probable 1-deoxy-D-xylulose-5-phosphate synthase 2, chloroplastic;Ontology_term=GO:0006694%2C GO:0008661%2C GO:0016114
OE9A009884	14.3999	2.83023	0.770937	3.67115	0.000241457	0.00198296	ID=OE9A009884T1;Parent=OE9A009884;Name=OE9A009884T1;product=OE9A009884P1
OE9A096921	410.256	2.82838	0.823733	3.43361	0.000595591	0.0043031	ID=OE9A096921T1;Parent=OE9A096921;Name=OE9A096921T1;product=OE9A096921P1;Description=pathogenesis-related STH-2-like;Ontology_term=GO:0006952%2C GO:0009607
OE9A083122	26.8994	2.82244	0.600898	4.69703	2.63967e-06	3.59934e-05	ID=OE9A083122T1;Parent=OE9A083122;Name=OE9A083122T1;product=OE9A083122P1;Description=LRR receptor-like serine threonine- kinase GSO1;Ontology_term=GO:0005515
OE9A075946	7.91154	2.81579	1.13531	2.4802	0.013131	0.0545204	ID=OE9A075946T1;Parent=OE9A075946;Name=OE9A075946T1;product=OE9A075946P1;Description=ethylene-responsive transcription factor 5-like;Ontology_term=GO:0003677%2C GO:0003700%2C GO:0005667%2C GO:0006355%2C GO:0045449
OE9A035730	97.4248	2.808	0.568389	4.94028	7.80112e-07	1.19901e-05	ID=OE9A035730T1;Parent=OE9A035730;Name=OE9A035730T1;product=OE9A035730P1;Description=lachrymatory-factor synthase;Ontology_term=GO:0004864%2C GO:0004872%2C GO:0005634%2C GO:0005737%2C GO:0009738%2C GO:0010427%2C GO:0080163
OE9A104280	268.687	2.79628	0.38599	7.24444	4.34245e-13	1.87577e-11	ID=OE9A104280T1;Parent=OE9A104280;Name=OE9A104280T1;product=OE9A104280P1;Description=probable polyamine transporter At1g31830 isoform X1;Ontology_term=GO:0003333%2C GO:0015171%2C GO:0016021
OE9A086623	32.473	2.79427	0.516205	5.4131	6.19417e-08	1.17467e-06	ID=OE9A086623T1;Parent=OE9A086623;Name=OE9A086623T1;product=OE9A086623P1;Description=RADIALIS-like 3;Ontology_term=GO:0003677%2C GO:0005634
OE9A024800	229.985	2.78783	0.340051	8.19827	2.43868e-16	1.54601e-14	ID=OE9A024800T1;Parent=OE9A024800;Name=OE9A024800T1;product=OE9A024800P1;Description=metallothiol transferase;Ontology_term=GO:0016829
OE9A049424	6.41085	2.78029	0.797478	3.48635	0.000489661	0.00362901	ID=OE9A049424T1;Parent=OE9A049424;Name=OE9A049424T1;product=OE9A049424P1;Description=allantoate deiminase;Ontology_term=GO:0005783%2C GO:0006145%2C GO:0006508%2C GO:0008237%2C GO:0010136%2C GO:0047652
OE9A084415	38.2246	2.77296	0.416702	6.65454	2.8418e-11	9.42606e-10	ID=OE9A084415T1;Parent=OE9A084415;Name=OE9A084415T1;product=OE9A084415P1;Description=amino acid permease 3-like;Ontology_term=GO:0016021
OE9A111504	5.5955	2.76587	1.23289	2.24341	0.0248701	0.0896586	ID=OE9A111504T1;Parent=OE9A111504;Name=OE9A111504T1;product=OE9A111504P1;Description=zinc finger ZAT11-like;Ontology_term=GO:0046872
OE9A106137	132.202	2.76177	1.01227	2.72831	0.00636599	0.0307831	ID=OE9A106137T1;Parent=OE9A106137;Name=OE9A106137T1;product=OE9A106137P1
OE9A105292	9.55732	2.75289	1.1742	2.34447	0.0190541	0.0730339	ID=OE9A105292T1;Parent=OE9A105292;Name=OE9A105292T1;product=OE9A105292P1;Description=WAT1-related At5g07050-like;Ontology_term=GO:0005886%2C GO:0016021%2C GO:0022857%2C GO:0055085
OE9A016963	38.7714	2.75258	1.08425	2.53869	0.0111269	0.0480769	ID=OE9A016963T1;Parent=OE9A016963;Name=OE9A016963T1;product=OE9A016963P1;Description=probable pectate lyase 8;Ontology_term=GO:0030570%2C GO:0045490%2C GO:0046872
OE9A033947	33.7818	2.75149	1.23041	2.23623	0.0253365	0.0909431	ID=OE9A033947T1;Parent=OE9A033947;Name=OE9A033947T1;product=OE9A033947P1;Description=cytochrome P450 78A6-like;Ontology_term=GO:0004497%2C GO:0005506%2C GO:0016021%2C GO:0016705%2C GO:0020037%2C GO:0055114
OE9A096612	5.97254	2.75028	0.923606	2.97776	0.00290364	0.0164264	ID=OE9A096612T1;Parent=OE9A096612;Name=OE9A096612T1;product=OE9A096612P1;Description=S-type anion channel SLAH4-like;Ontology_term=GO:0016021%2C GO:0055085
OE9A044979	14.0354	2.74364	1.02952	2.66498	0.00769935	0.0359529	ID=OE9A044979T1;Parent=OE9A044979;Name=OE9A044979T1;product=OE9A044979P1;Description=kirola-like;Ontology_term=GO:0006952%2C GO:0009607
OE9A107827	3.56687	2.74329	1.17712	2.3305	0.0197795	0.0750805	ID=OE9A107827T1;Parent=OE9A107827;Name=OE9A107827T1;product=OE9A107827P1;Description=arogenate dehydratase prephenate dehydratase 1, chloroplastic;Ontology_term=GO:0000162%2C GO:0004664%2C GO:0006571%2C GO:0009094%2C GO:0009570%2C GO:0016597%2C GO:0019274%2C GO:0047769
OE9A031523	76.2738	2.73125	0.601378	4.54165	5.58144e-06	7.12728e-05	ID=OE9A031523T1;Parent=OE9A031523;Name=OE9A031523T1;product=OE9A031523P1;Description=lachrymatory-factor synthase;Ontology_term=GO:0004864%2C GO:0004872%2C GO:0005634%2C GO:0005737%2C GO:0009738%2C GO:0010427%2C GO:0080163
OE9A025629	30.3051	2.72559	0.741686	3.67485	0.000237985	0.00196148	ID=OE9A025629T1;Parent=OE9A025629;Name=OE9A025629T1;product=OE9A025629P1;Description=premnaspirodiene oxygenase-like;Ontology_term=GO:0005506%2C GO:0016705%2C GO:0020037%2C GO:0055114
OE9A064951	3.43033	2.71305	1.2017	2.25767	0.0239661	0.0872204	ID=OE9A064951T1;Parent=OE9A064951;Name=OE9A064951T1;product=OE9A064951P1;Description=eukaryotic peptide chain release factor GTP-binding subunit ERF3A-like isoform X1;Ontology_term=GO:0003924%2C GO:0005525
OE9A095195	168.51	2.71035	0.452148	5.99438	2.04259e-09	4.96747e-08	ID=OE9A095195T1;Parent=OE9A095195;Name=OE9A095195T1;product=OE9A095195P1;Description=bifunctional 3-dehydroquinate dehydratase shikimate dehydrogenase, chloroplastic isoform X3;Ontology_term=GO:0000162%2C GO:0003855%2C GO:0004764%2C GO:0006571%2C GO:0009094%2C GO:0019632%2C GO:0050661%2C GO:0055114
OE9A063359	15.4686	2.71027	0.992995	2.72939	0.00634523	0.0307	ID=OE9A063359T1;Parent=OE9A063359;Name=OE9A063359T1;product=OE9A063359P1;Description=leucine-rich repeat extensin 4;Ontology_term=GO:0005515
OE9A110095	86.4682	2.70414	0.276958	9.76373	1.61116e-22	2.07769e-20	ID=OE9A110095T1;Parent=OE9A110095;Name=OE9A110095T1;product=OE9A110095P1;Description=gamma-glutamyl peptidase 5-like;Ontology_term=GO:0005829%2C GO:0006508%2C GO:0008233%2C GO:0019760
OE9A035506	25.5227	2.70354	0.834747	3.23875	0.00120056	0.00785786	ID=OE9A035506T1;Parent=OE9A035506;Name=OE9A035506T1;product=OE9A035506P1;Description=ethylene-responsive transcription factor ERF096-like;Ontology_term=GO:0003677%2C GO:0003700%2C GO:0005634%2C GO:0005667%2C GO:0006355%2C GO:0045449
OE9A101530	237.536	2.69977	0.262792	10.2734	9.28546e-25	1.49677e-22	ID=OE9A101530T1;Parent=OE9A101530;Name=OE9A101530T1;product=OE9A101530P1;Description=NAC domain-containing 35;Ontology_term=GO:0003677%2C GO:0005634%2C GO:0006355
OE9A120430	1213.27	2.69379	1.04383	2.58068	0.00986061	0.0437154	ID=OE9A120430T1;Parent=OE9A120430;Name=OE9A120430T1;product=OE9A120430P1;Description=lipid-transfer DIR1;Ontology_term=GO:0006508%2C GO:0008233
OE9A003540	170.743	2.69211	0.888038	3.03152	0.00243322	0.0141939	ID=OE9A003540T1;Parent=OE9A003540;Name=OE9A003540T1;product=OE9A003540P1;Description=blue copper -like;Ontology_term=GO:0006118%2C GO:0009055
OE9A083249	4464.1	2.69208	0.351388	7.66127	1.841e-14	9.43194e-13	ID=OE9A083249T1;Parent=OE9A083249;Name=OE9A083249T1;product=OE9A083249P1;Description=heavy metal-associated isoprenylated plant 3-like;Ontology_term=GO:0030001%2C GO:0046872
OE9A078348	59.1198	2.69176	0.333259	8.07707	6.63388e-16	3.98575e-14	ID=OE9A078348T1;Parent=OE9A078348;Name=OE9A078348T1;product=OE9A078348P1;Description=strigolactone esterase D14;Ontology_term=GO:0016787
OE9A092194	8.24214	2.68789	0.678246	3.96301	7.40109e-05	0.000708961	ID=OE9A092194T1;Parent=OE9A092194;Name=OE9A092194T1;product=OE9A092194P1
OE9A117276	8.03246	2.68365	0.947605	2.83203	0.00462532	0.0237812	ID=OE9A117276T1;Parent=OE9A117276;Name=OE9A117276T1;product=OE9A117276P1;Description=ethylene-responsive transcription factor CRF4-like;Ontology_term=GO:0003677%2C GO:0003700%2C GO:0005667%2C GO:0006355%2C GO:0045449
OE9A073727	17.2159	2.68348	0.865606	3.10012	0.00193445	0.0116943	ID=OE9A073727T1;Parent=OE9A073727;Name=OE9A073727T1;product=OE9A073727P1
OE9A098184	15.7761	2.67998	1.05154	2.54861	0.0108152	0.047017	ID=OE9A098184T1;Parent=OE9A098184;Name=OE9A098184T1;product=OE9A098184P1;Description=berberine bridge enzyme-like 13;Ontology_term=GO:0016614%2C GO:0050660%2C GO:0055114
OE9A073420	6.11737	2.67946	1.133	2.36494	0.0180332	0.0700552	ID=OE9A073420T1;Parent=OE9A073420;Name=OE9A073420T1;product=OE9A073420P1;Description=KH domain-containing At4g18375 isoform X1;Ontology_term=GO:0003723
OE9A033674	130.772	2.67703	0.203791	13.1362	2.04349e-39	1.03888e-36	ID=OE9A033674T1;Parent=OE9A033674;Name=OE9A033674T1;product=OE9A033674P1;Description=RING-H2 finger ATL74-like;Ontology_term=GO:0005515%2C GO:0008270%2C GO:0016020
OE9A042563	170.328	2.67656	0.885689	3.022	0.00251107	0.0145736	ID=OE9A042563T1;Parent=OE9A042563;Name=OE9A042563T1;product=OE9A042563P1;Description=blue copper -like;Ontology_term=GO:0006118%2C GO:0009055
OE9A063225	12.3947	2.67568	0.653328	4.09547	4.21316e-05	0.000427724	ID=OE9A063225T1;Parent=OE9A063225;Name=OE9A063225T1;product=OE9A063225P1;Description=DMR6-LIKE OXYGENASE 2-like;Ontology_term=GO:0005506%2C GO:0016491%2C GO:0055114
OE9A038120	90.5508	2.67354	1.20116	2.2258	0.0260278	0.0927821	ID=OE9A038120T1;Parent=OE9A038120;Name=OE9A038120T1;product=OE9A038120P1;Description=pathogenesis-related STH-2-like;Ontology_term=GO:0006952%2C GO:0009607
OE9A002550	10.7364	2.67205	0.781144	3.42069	0.000624635	0.0044811	ID=OE9A002550T1;Parent=OE9A002550;Name=OE9A002550T1;product=OE9A002550P1;Description=BEL1-like homeodomain 4;Ontology_term=GO:0003677%2C GO:0006355
OE9A103302	8.80026	2.66995	0.863169	3.0932	0.00198012	0.011924	ID=OE9A103302T1;Parent=OE9A103302;Name=OE9A103302T1;product=OE9A103302P1
OE9A060505	1411.69	2.66665	0.526391	5.0659	4.06468e-07	6.60441e-06	ID=OE9A060505T1;Parent=OE9A060505;Name=OE9A060505T1;product=OE9A060505P1;Description=endochitinase EP3-like;Ontology_term=GO:0004568%2C GO:0005975%2C GO:0006032%2C GO:0008061%2C GO:0016998
OE9A084374	26.0186	2.66197	0.960815	2.77053	0.00559645	0.0277784	ID=OE9A084374T1;Parent=OE9A084374;Name=OE9A084374T1;product=OE9A084374P1;Description=cytochrome P450 94A2-like;Ontology_term=GO:0004497%2C GO:0005506%2C GO:0016021%2C GO:0016705%2C GO:0020037%2C GO:0055114
OE9A088414	76.6464	2.66164	0.314374	8.46648	2.52929e-17	1.8522e-15	ID=OE9A088414T1;Parent=OE9A088414;Name=OE9A088414T1;product=OE9A088414P1;Description=gamma-glutamyl peptidase 5-like;Ontology_term=GO:0005829%2C GO:0006508%2C GO:0008233%2C GO:0019760
OE9A109839	3.72044	2.64707	1.08152	2.44754	0.0143837	0.0585626	ID=OE9A109839T1;Parent=OE9A109839;Name=OE9A109839T1;product=OE9A109839P1;Description=aluminum-activated malate transporter 13-like;Ontology_term=GO:0015743%2C GO:0016020
OE9A067286	184.387	2.64326	0.631786	4.18379	2.86685e-05	0.000304982	ID=OE9A067286T1;Parent=OE9A067286;Name=OE9A067286T1;product=OE9A067286P1
OE9A040561	29.9411	2.64242	0.366685	7.20624	5.75181e-13	2.44069e-11	ID=OE9A040561T1;Parent=OE9A040561;Name=OE9A040561T1;product=OE9A040561P1;Description=hydroxyproline O-arabinosyltransferase 3;Ontology_term=GO:0012505%2C GO:0043227%2C GO:0043229%2C GO:0044444
OE9A002581	3.62163	2.63668	1.05373	2.50224	0.0123411	0.0520206	ID=OE9A002581T1;Parent=OE9A002581;Name=OE9A002581T1;product=OE9A002581P1;Description=aldose 1-epimerase-like;Ontology_term=GO:0004034%2C GO:0006094%2C GO:0006096%2C GO:0030246
OE9A064396	9.86969	2.63584	0.562641	4.68477	2.80277e-06	3.7997e-05	ID=OE9A064396T1;Parent=OE9A064396;Name=OE9A064396T1;product=OE9A064396P1
OE9A040443	12.0476	2.62855	0.554288	4.74221	2.11404e-06	2.95229e-05	ID=OE9A040443T1;Parent=OE9A040443;Name=OE9A040443T1;product=OE9A040443P1
OE9A038370	7.77814	2.62746	0.878845	2.98968	0.00279272	0.0159181	ID=OE9A038370T1;Parent=OE9A038370;Name=OE9A038370T1;product=OE9A038370P1;Description=ankyrin repeat-containing BDA1-like;Ontology_term=GO:0005515%2C GO:0016020
OE9A111466	37.5028	2.62638	0.516525	5.0847	3.68198e-07	6.0196e-06	ID=OE9A111466T1;Parent=OE9A111466;Name=OE9A111466T1;product=OE9A111466P1;Description=hippocampus abundant transcript 1;Ontology_term=GO:0005215%2C GO:0016021%2C GO:0055085
OE9A000556	20.933	2.62031	0.732146	3.57895	0.000344977	0.00270698	ID=OE9A000556T1;Parent=OE9A000556;Name=OE9A000556T1;product=OE9A000556P1;Description=LEAF RUST 10 DISEASE-RESISTANCE LOCUS RECEPTOR-LIKE PROTEIN KINASE-like;Ontology_term=GO:0030247
OE9A010840	136.436	2.61979	0.311902	8.3994	4.4875e-17	3.14673e-15	ID=OE9A010840T1;Parent=OE9A010840;Name=OE9A010840T1;product=OE9A010840P1;Description=calcium-transporting ATPase 12, plasma membrane-type-like;Ontology_term=GO:0000166%2C GO:0006810%2C GO:0016021%2C GO:0046872
OE9A120982	51.9457	2.61766	0.957049	2.73513	0.00623549	0.0302962	ID=OE9A120982T1;Parent=OE9A120982;Name=OE9A120982T1;product=OE9A120982P1;Description=premnaspirodiene oxygenase-like;Ontology_term=GO:0004497%2C GO:0005506%2C GO:0016021%2C GO:0016705%2C GO:0020037%2C GO:0055114
OE9A070439	4.41202	2.6156	1.10716	2.36244	0.0181553	0.0703745	ID=OE9A070439T1;Parent=OE9A070439;Name=OE9A070439T1;product=OE9A070439P1
OE9A006366	12.8633	2.61188	0.855709	3.0523	0.00227097	0.0133768	ID=OE9A006366T1;Parent=OE9A006366;Name=OE9A006366T1;product=OE9A006366P1;Description=4-coumarate-- ligase 1;Ontology_term=GO:0005524%2C GO:0009805%2C GO:0009809%2C GO:0009811%2C GO:0016207
OE9A089497	605.134	2.60751	0.300001	8.69168	3.57108e-18	2.9594e-16	ID=OE9A089497T1;Parent=OE9A089497;Name=OE9A089497T1;product=OE9A089497P1;Description=D-3-phosphoglycerate dehydrogenase 2, chloroplastic;Ontology_term=GO:0004617%2C GO:0006544%2C GO:0006564%2C GO:0006566%2C GO:0016597%2C GO:0051287%2C GO:0055114
OE9A060010	201.116	2.60624	0.395606	6.58796	4.45916e-11	1.44287e-09	ID=OE9A060010T1;Parent=OE9A060010;Name=OE9A060010T1;product=OE9A060010P1;Description=wall-associated receptor kinase-like 8;Ontology_term=GO:0004672%2C GO:0005515%2C GO:0005524%2C GO:0006468
OE9A059337	159.258	2.60466	0.78482	3.31879	0.000904071	0.00617572	ID=OE9A059337T1;Parent=OE9A059337;Name=OE9A059337T1;product=OE9A059337P1;Description=DETOXIFICATION 43;Ontology_term=GO:0006855%2C GO:0015238%2C GO:0015297%2C GO:0016021
OE9A085621	280.621	2.60398	0.298972	8.7098	3.04421e-18	2.56295e-16	ID=OE9A085621T1;Parent=OE9A085621;Name=OE9A085621T1;product=OE9A085621P1
OE9A035993	116.618	2.59625	0.535175	4.85122	1.22705e-06	1.80715e-05	ID=OE9A035993T1;Parent=OE9A035993;Name=OE9A035993T1;product=OE9A035993P1;Description=pectinesterase-like;Ontology_term=GO:0005618%2C GO:0005982%2C GO:0005985%2C GO:0030599%2C GO:0042545%2C GO:0043086%2C GO:0045330%2C GO:0045490%2C GO:0046910
OE9A013832	24.4948	2.59519	0.511329	5.07538	3.86721e-07	6.30294e-06	ID=OE9A013832T1;Parent=OE9A013832;Name=OE9A013832T1;product=OE9A013832P1
OE9A077750	6.64454	2.59293	0.907353	2.85768	0.00426746	0.0223395	ID=OE9A077750T1;Parent=OE9A077750;Name=OE9A077750T1;product=OE9A077750P1;Description=WD repeat-containing 44;Ontology_term=GO:0005515
OE9A114279	13.2412	2.59198	0.948864	2.73167	0.00630147	0.0305382	ID=OE9A114279T1;Parent=OE9A114279;Name=OE9A114279T1;product=OE9A114279P1;Description=berberine bridge enzyme-like 13;Ontology_term=GO:0016614%2C GO:0050660%2C GO:0055114
OE9A108202	4251.25	2.58873	0.170328	15.1985	3.61934e-52	3.82723e-49	ID=OE9A108202T1;Parent=OE9A108202;Name=OE9A108202T1;product=OE9A108202P1;Description=glycine-rich RNA-binding GRP1A-like;Ontology_term=GO:0000166%2C GO:0003676
OE9A107334	7.69936	2.58524	0.89055	2.90296	0.00369649	0.0199592	ID=OE9A107334T1;Parent=OE9A107334;Name=OE9A107334T1;product=OE9A107334P1;Description=Probable Histone-lysine N-methyltransferase ATXR5
OE9A110754	6.1275	2.58443	0.72627	3.55849	0.000372991	0.00289841	ID=OE9A110754T1;Parent=OE9A110754;Name=OE9A110754T1;product=OE9A110754P1
OE9A106316	15248.3	2.58429	0.301951	8.55866	1.14183e-17	8.74939e-16	ID=OE9A106316T1;Parent=OE9A106316;Name=OE9A106316T1;product=OE9A106316P1;Description=secoisolariciresinol dehydrogenase-like;Ontology_term=GO:0016491%2C GO:0055114
OE9A001600	9.33439	2.58327	0.832984	3.10122	0.00192722	0.0116613	ID=OE9A001600T1;Parent=OE9A001600;Name=OE9A001600T1;product=OE9A001600P1;Description=xyloglucan endotransglucosylase hydrolase 31-like;Ontology_term=GO:0004553%2C GO:0005618%2C GO:0010411%2C GO:0016762%2C GO:0042546%2C GO:0048046%2C GO:0071555
OE9A073364	388.062	2.58305	0.310329	8.32359	8.53386e-17	5.78464e-15	ID=OE9A073364T1;Parent=OE9A073364;Name=OE9A073364T1;product=OE9A073364P1
OE9A065742	229.843	2.58078	0.5012	5.1492	2.61594e-07	4.39359e-06	ID=OE9A065742T1;Parent=OE9A065742;Name=OE9A065742T1;product=OE9A065742P1;Description=cytochrome P450 CYP72A219-like;Ontology_term=GO:0004497%2C GO:0005506%2C GO:0016021%2C GO:0016705%2C GO:0020037%2C GO:0055114
OE9A003967	3.92031	2.57935	1.12526	2.29223	0.0218922	0.0812271	ID=OE9A003967T1;Parent=OE9A003967;Name=OE9A003967T1;product=OE9A003967P1;md5=a085680c85482ce1a3d13112d84145c4;INTERPRO=<table><tr><th>DB</th><th>ID</th><th>Description</th></tr><tr><td>Gene3D</td><td>G3DSA:2.130.10.10</td><td></td></tr><tr><td>PANTHER</td><td>PTHR22847</td><td></td></tr><tr><td>PANTHER</td><td>PTHR22847:SF422</td><td></td></tr><tr><td>Pfam</td><td>PF00400</td><td>WD domain%2C G-b…
OE9A042238	8.14363	2.57387	1.10527	2.32874	0.0198731	0.0753319	ID=OE9A042238T1;Parent=OE9A042238;Name=OE9A042238T1;product=OE9A042238P1;Description=G-type lectin S-receptor-like serine threonine- kinase RLK1;Ontology_term=GO:0004674%2C GO:0005524%2C GO:0006468%2C GO:0009069%2C GO:0016021
OE9A010847	32.781	2.57228	0.824888	3.11833	0.00181876	0.0111118	ID=OE9A010847T1;Parent=OE9A010847;Name=OE9A010847T1;product=OE9A010847P1;Description=F-box At2g27310;Ontology_term=GO:0005515%2C GO:0016020
OE9A091680	9.11765	2.57161	0.87326	2.94484	0.00323117	0.0178911	ID=OE9A091680T1;Parent=OE9A091680;Name=OE9A091680T1;product=OE9A091680P1;Description=receptor kinase At5g39000;Ontology_term=GO:0004672%2C GO:0005524%2C GO:0006468%2C GO:0016020
OE9A084426	9.49987	2.56703	0.661283	3.88189	0.000103647	0.000955043	ID=OE9A084426T1;Parent=OE9A084426;Name=OE9A084426T1;product=OE9A084426P1;Description=serine carboxypeptidase-like 50;Ontology_term=GO:0004185%2C GO:0006508
OE9A023360	153.753	2.56586	0.637514	4.02479	5.70259e-05	0.000560839	ID=OE9A023360T1;Parent=OE9A023360;Name=OE9A023360T1;product=OE9A023360P1;Description=calcium-dependent kinase SK5-like;Ontology_term=GO:0004683%2C GO:0005509%2C GO:0005516%2C GO:0005524%2C GO:0005634%2C GO:0005737%2C GO:0005886%2C GO:0009069%2C GO:0009738%2C GO:0009931%2C GO:0018105%2C GO:0035556%2C GO:0046777
OE9A003034	7.88115	2.56436	0.870807	2.94481	0.00323157	0.0178911	ID=OE9A003034T1;Parent=OE9A003034;Name=OE9A003034T1;product=OE9A003034P1;Description=lactoylglutathione lyase;Ontology_term=GO:0004462%2C GO:0005975%2C GO:0006090%2C GO:0046872
OE9A079089	628.864	2.55004	0.302676	8.42499	3.60796e-17	2.57236e-15	ID=OE9A079089T1;Parent=OE9A079089;Name=OE9A079089T1;product=OE9A079089P1
OE9A098085	265.477	2.55001	0.589984	4.32217	1.545e-05	0.000177042	ID=OE9A098085T1;Parent=OE9A098085;Name=OE9A098085T1;product=OE9A098085P1;Description=receptor kinase 5;Ontology_term=GO:0004672%2C GO:0005515%2C GO:0005524%2C GO:0006468%2C GO:0016020
OE9A103256	19.9763	2.54884	0.72438	3.51865	0.000433752	0.00329313	ID=OE9A103256T1;Parent=OE9A103256;Name=OE9A103256T1;product=OE9A103256P1;Description=premnaspirodiene oxygenase-like;Ontology_term=GO:0004497%2C GO:0005506%2C GO:0016021%2C GO:0016705%2C GO:0020037%2C GO:0055114
OE9A053897	264.034	2.54785	0.231998	10.9822	4.65453e-28	1.02539e-25	ID=OE9A053897T1;Parent=OE9A053897;Name=OE9A053897T1;product=OE9A053897P1
OE9A047912	4.24972	2.5453	1.026	2.48079	0.0131092	0.0544555	ID=OE9A047912T1;Parent=OE9A047912;Name=OE9A047912T1;product=OE9A047912P1;Description=germin 11-1;Ontology_term=GO:0005576%2C GO:0005618%2C GO:0030145%2C GO:0033609%2C GO:0045735%2C GO:0046487%2C GO:0046564
OE9A011434	8.21493	2.54144	0.837517	3.0345	0.00240936	0.014076	ID=OE9A011434T1;Parent=OE9A011434;Name=OE9A011434T1;product=OE9A011434P1;Description=NUCLEAR FUSION DEFECTIVE 4-like;Ontology_term=GO:0016021
OE9A083386	1298.73	2.53908	0.307006	8.27046	1.33447e-16	8.71063e-15	ID=OE9A083386T1;Parent=OE9A083386;Name=OE9A083386T1;product=OE9A083386P1;Description=beta-glucosidase-like;Ontology_term=GO:0005975%2C GO:0008422
OE9A072004	44.72	2.53624	0.479956	5.28431	1.26177e-07	2.2599e-06	ID=OE9A072004T2;Parent=OE9A072004;Name=OE9A072004T2;product=OE9A072004P2;Description=transcription factor bHLH63-like;Ontology_term=GO:0046983
OE9A014291	2100.1	2.53056	0.220274	11.4882	1.51153e-30	3.84218e-28	ID=OE9A014291T1;Parent=OE9A014291;Name=OE9A014291T1;product=OE9A014291P1;Description=LRR receptor-like serine threonine- kinase GSO1;Ontology_term=GO:0005515
OE9A094026	5.81197	2.52481	1.07889	2.34019	0.0192739	0.0737055	ID=OE9A094026T1;Parent=OE9A094026;Name=OE9A094026T1;product=OE9A094026P1;Description=thioredoxin H4-1-like;Ontology_term=GO:0000103%2C GO:0005829%2C GO:0005886%2C GO:0006118%2C GO:0006457%2C GO:0006662%2C GO:0015035%2C GO:0016671%2C GO:0034599%2C GO:0045454%2C GO:0055114
OE9A119611	485.595	2.52243	0.172915	14.5877	3.3652e-48	2.78008e-45	ID=OE9A119611T1;Parent=OE9A119611;Name=OE9A119611T1;product=OE9A119611P1;Description=zinc-finger homeodomain 9-like;Ontology_term=GO:0003677
OE9A022841	6.81783	2.522	0.877915	2.87272	0.0040696	0.021547	ID=OE9A022841T1;Parent=OE9A022841;Name=OE9A022841T1;product=OE9A022841P1
OE9A066383	16.954	2.52071	0.524735	4.80378	1.55695e-06	2.24425e-05	ID=OE9A066383T1;Parent=OE9A066383;Name=OE9A066383T1;product=OE9A066383P1;Description=acyl-coenzyme A oxidase 3, peroxisomal;Ontology_term=GO:0000062%2C GO:0003995%2C GO:0003997%2C GO:0005777%2C GO:0006118%2C GO:0006637%2C GO:0009055%2C GO:0033539%2C GO:0050660%2C GO:0052890%2C GO:0055088
OE9A101477	38.8411	2.52001	0.534934	4.71088	2.46648e-06	3.39958e-05	ID=OE9A101477T1;Parent=OE9A101477;Name=OE9A101477T1;product=OE9A101477P1;Description=cold-regulated 413 plasma membrane 2;Ontology_term=GO:0005774%2C GO:0016021
OE9A073769	18.8632	2.51734	0.496051	5.07476	3.87981e-07	6.31568e-06	ID=OE9A073769T1;Parent=OE9A073769;Name=OE9A073769T1;product=OE9A073769P1;Description=Two-component response regulator ARR9;Ontology_term=GO:0000160%2C GO:0005622
OE9A024902	13.0827	2.51119	0.66981	3.74911	0.00017746	0.00152217	ID=OE9A024902T1;Parent=OE9A024902;Name=OE9A024902T1;product=OE9A024902P1;Description=ABC transporter G family member 25;Ontology_term=GO:0005524%2C GO:0005886%2C GO:0016021%2C GO:0042626%2C GO:0055085
OE9A010853	397.874	2.5106	0.758336	3.31067	0.000930735	0.00633417	ID=OE9A010853T1;Parent=OE9A010853;Name=OE9A010853T1;product=OE9A010853P1;Description=F-box At3g07870-like;Ontology_term=GO:0005515
OE9A010595	3.63076	2.51045	1.11342	2.25472	0.0241511	0.0877243	ID=OE9A010595T1;Parent=OE9A010595;Name=OE9A010595T1;product=OE9A010595P1;Description=ethylene-responsive transcription factor ERF024;Ontology_term=GO:0003677%2C GO:0003700%2C GO:0005667%2C GO:0006355%2C GO:0045449
OE9A100467	122.405	2.51013	0.530445	4.73212	2.22188e-06	3.08982e-05	ID=OE9A100467T1;Parent=OE9A100467;Name=OE9A100467T1;product=OE9A100467P1;Description=wall-associated receptor kinase-like 8;Ontology_term=GO:0004672%2C GO:0005509%2C GO:0005515%2C GO:0005524%2C GO:0006468%2C GO:0030247
OE9A120539	247.408	2.50668	0.450276	5.56699	2.59175e-08	5.24621e-07	ID=OE9A120539T1;Parent=OE9A120539;Name=OE9A120539T1;product=OE9A120539P1;Description=serine carboxypeptidase-like 34;Ontology_term=GO:0004185%2C GO:0005773%2C GO:0006508%2C GO:0009505
OE9A039170	46.8515	2.5063	0.908326	2.75925	0.00579336	0.0285521	ID=OE9A039170T1;Parent=OE9A039170;Name=OE9A039170T1;product=OE9A039170P1;Description=DETOXIFICATION 49-like;Ontology_term=GO:0006855%2C GO:0015238%2C GO:0015297%2C GO:0016021
OE9A036749	21.6011	2.5032	0.62798	3.98612	6.71614e-05	0.000650527	ID=OE9A036749T1;Parent=OE9A036749;Name=OE9A036749T1;product=OE9A036749P1;Description=equilibrative nucleotide transporter 3-like;Ontology_term=GO:0005337%2C GO:0016021%2C GO:1901642
OE9A062364	6.0985	2.50126	0.98018	2.55184	0.0107155	0.0466374	ID=OE9A062364T1;Parent=OE9A062364;Name=OE9A062364T1;product=OE9A062364P1;Description=photosynthetic NDH subunit of subcomplex B 1, chloroplastic;Ontology_term=GO:0009535%2C GO:0009773%2C GO:0010598
OE9A006853	7.26059	2.50089	0.729503	3.42821	0.000607579	0.00437536	ID=OE9A006853T1;Parent=OE9A006853;Name=OE9A006853T1;product=OE9A006853P1;Description=probable phosphatase 2C 34;Ontology_term=GO:0004722%2C GO:0006470%2C GO:0008287
OE9A052268	1130.37	2.49999	0.276126	9.05381	1.38061e-19	1.36186e-17	ID=OE9A052268T1;Parent=OE9A052268;Name=OE9A052268T1;product=OE9A052268P1;Description=bZIP transcription factor 11-like;Ontology_term=GO:0003700%2C GO:0005667%2C GO:0006355%2C GO:0043565%2C GO:0045449
OE9A001734	1420.23	2.49927	0.251438	9.93992	2.79055e-23	3.80263e-21	ID=OE9A001734T1;Parent=OE9A001734;Name=OE9A001734T1;product=OE9A001734P1;Description=ACT domain-containing ACR10;Ontology_term=GO:0008152%2C GO:0016597
OE9A118859	25.5441	2.49864	0.973092	2.56773	0.0102366	0.045005	ID=OE9A118859T1;Parent=OE9A118859;Name=OE9A118859T1;product=OE9A118859P1;Description=pathogenesis-related STH-2-like;Ontology_term=GO:0006952%2C GO:0009607
OE9A052741	513.785	2.49827	0.156804	15.9324	3.77321e-57	5.24992e-54	ID=OE9A052741T1;Parent=OE9A052741;Name=OE9A052741T1;product=OE9A052741P1;Description=tubby-like F-box 3;Ontology_term=GO:0005515%2C GO:0005929%2C GO:0035091%2C GO:0061512
OE9A106535	14.3364	2.49653	0.646818	3.85971	0.000113524	0.00103308	ID=OE9A106535T1;Parent=OE9A106535;Name=OE9A106535T1;product=OE9A106535P1;Description=U-box domain-containing 13-like;Ontology_term=GO:0004842%2C GO:0005515%2C GO:0016567
OE9A022767	6853.56	2.49537	0.148805	16.7694	4.08764e-63	9.00507e-60	ID=OE9A022767T1;Parent=OE9A022767;Name=OE9A022767T1;product=OE9A022767P1;Description=glycine-rich RNA-binding GRP1A-like;Ontology_term=GO:0000166%2C GO:0000380%2C GO:0003690%2C GO:0003697%2C GO:0003729%2C GO:0005634%2C GO:0005777%2C GO:0005829%2C GO:0006406%2C GO:0006970%2C GO:0009506%2C GO:0009507%2C GO:0009735%2C GO:0010119%2C GO:0010228%2C GO:0010501%2C GO:0032508%2C GO:0045087%2C GO:0048046
OE9A075155	8.04214	2.49198	0.926863	2.68861	0.00717493	0.0339739	ID=OE9A075155T1;Parent=OE9A075155;Name=OE9A075155T1;product=OE9A075155P1;Description=amino-acid permease BAT1 homolog;Ontology_term=GO:0005887%2C GO:0015179%2C GO:0015297%2C GO:1902475
OE9A035049	4.52244	2.4839	1.1315	2.19523	0.0281474	0.0982186	ID=OE9A035049T1;Parent=OE9A035049;Name=OE9A035049T1;product=OE9A035049P1;Description=shikimate O-hydroxycinnamoyltransferase-like;Ontology_term=GO:0016747
OE9A015439	9.11518	2.4786	0.857826	2.8894	0.00385982	0.0206305	ID=OE9A015439T1;Parent=OE9A015439;Name=OE9A015439T1;product=OE9A015439P1;Description=Auxin response factor 17
OE9A049615	7.43452	2.47738	0.913169	2.71295	0.00666878	0.0320363	ID=OE9A049615T1;Parent=OE9A049615;Name=OE9A049615T1;product=OE9A049615P1;Description=probable plastidic glucose transporter 1;Ontology_term=GO:0016021%2C GO:0022857%2C GO:0055085
OE9A115044	1840.43	2.47361	0.291945	8.47289	2.39384e-17	1.75788e-15	ID=OE9A115044T1;Parent=OE9A115044;Name=OE9A115044T1;product=OE9A115044P1;Description=ankyrin repeat-containing BDA1-like;Ontology_term=GO:0005515%2C GO:0016020
OE9A020055	836.666	2.46845	0.351345	7.02573	2.12953e-12	8.2546e-11	ID=OE9A020055T1;Parent=OE9A020055;Name=OE9A020055T1;product=OE9A020055P1;Description=adenine guanine permease AZG1;Ontology_term=GO:0005345%2C GO:0016021%2C GO:1904823
OE9A046822	15.5724	2.46565	1.10535	2.23066	0.0257038	0.0919369	ID=OE9A046822T1;Parent=OE9A046822;Name=OE9A046822T1;product=OE9A046822P1
OE9A023329	143.503	2.46487	0.473659	5.20389	1.95161e-07	3.36109e-06	ID=OE9A023329T1;Parent=OE9A023329;Name=OE9A023329T1;product=OE9A023329P1;Description=high-affinity nitrate transporter -like;Ontology_term=GO:0010167%2C GO:0015706%2C GO:0016021
OE9A012828	15.3486	2.46483	0.69354	3.55399	0.000379438	0.00293987	ID=OE9A012828T1;Parent=OE9A012828;Name=OE9A012828T1;product=OE9A012828P1
OE9A012708	5.4157	2.46284	0.895403	2.75053	0.00594982	0.0291547	ID=OE9A012708T1;Parent=OE9A012708;Name=OE9A012708T1;product=OE9A012708P1;Description=Branch domain-containing;Ontology_term=GO:0008375%2C GO:0016021
OE9A095145	21.4327	2.46009	0.498235	4.93761	7.90851e-07	1.2127e-05	ID=OE9A095145T1;Parent=OE9A095145;Name=OE9A095145T1;product=OE9A095145P1;Description=autophagy-related 11;Ontology_term=GO:0000045%2C GO:0001934%2C GO:0019901%2C GO:0034045%2C GO:1990316
OE9A051613	20.0614	2.459	1.00858	2.43807	0.0147658	0.0597777	ID=OE9A051613T1;Parent=OE9A051613;Name=OE9A051613T1;product=OE9A051613P1;Description=beta-amyrin 28-oxidase-like;Ontology_term=GO:0004497%2C GO:0005506%2C GO:0016021%2C GO:0016705%2C GO:0020037%2C GO:0055114
OE9A080512	112.005	2.45556	0.451141	5.443	5.23915e-08	1.00583e-06	ID=OE9A080512T1;Parent=OE9A080512;Name=OE9A080512T1;product=OE9A080512P1
OE9A039757	11.8214	2.45285	0.692647	3.54127	0.00039821	0.00305485	ID=OE9A039757T1;Parent=OE9A039757;Name=OE9A039757T1;product=OE9A039757P1;Description=ankyrin repeat-containing ITN1-like isoform X1;Ontology_term=GO:0005515%2C GO:0016020
OE9A016148	7.27827	2.45256	0.775971	3.16063	0.00157429	0.0098691	ID=OE9A016148T1;Parent=OE9A016148;Name=OE9A016148T1;product=OE9A016148P1;Description=pectinesterase pectinesterase inhibitor 45;Ontology_term=GO:0005618%2C GO:0005982%2C GO:0005985%2C GO:0016021%2C GO:0030599%2C GO:0042545%2C GO:0043086%2C GO:0045330%2C GO:0045490%2C GO:0046910
OE9A119393	11.4669	2.44984	1.03324	2.37103	0.0177385	0.0691544	ID=OE9A119393T1;Parent=OE9A119393;Name=OE9A119393T1;product=OE9A119393P1;Description=homeobox-leucine zipper HDG1-like isoform X3;Ontology_term=GO:0003677%2C GO:0008289
OE9A096707	662.058	2.44618	0.399448	6.12391	9.13061e-10	2.39699e-08	ID=OE9A096707T1;Parent=OE9A096707;Name=OE9A096707T1;product=OE9A096707P1
OE9A071129	9.68193	2.44258	1.10853	2.20343	0.0275641	0.0968482	ID=OE9A071129T1;Parent=OE9A071129;Name=OE9A071129T1;product=OE9A071129P1;Description=G-type lectin S-receptor-like serine threonine- kinase RLK1;Ontology_term=GO:0004672%2C GO:0005524%2C GO:0006468%2C GO:0016020
OE9A101505	12.5154	2.44225	0.45552	5.36145	8.25565e-08	1.53695e-06	ID=OE9A101505T1;Parent=OE9A101505;Name=OE9A101505T1;product=OE9A101505P1
OE9A053202	6.65566	2.44025	0.908215	2.68687	0.00721257	0.0341277	ID=OE9A053202T1;Parent=OE9A053202;Name=OE9A053202T1;product=OE9A053202P1;Description=DA1-related 1-like;Ontology_term=GO:0008270
OE9A047438	8.76187	2.43479	0.749797	3.24727	0.00116518	0.00766807	ID=OE9A047438T1;Parent=OE9A047438;Name=OE9A047438T1;product=OE9A047438P1;Description=DEAD-box ATP-dependent RNA helicase 53-like;Ontology_term=GO:0003676%2C GO:0004386%2C GO:0005524
OE9A081664	86.2707	2.43402	0.214215	11.3625	6.42607e-30	1.57296e-27	ID=OE9A081664T1;Parent=OE9A081664;Name=OE9A081664T1;product=OE9A081664P1;Description=lipoate- ligase A isoform X1;Ontology_term=GO:0006464%2C GO:0016874
OE9A109678	6.91215	2.43326	0.948604	2.5651	0.0103147	0.0452654	ID=OE9A109678T1;Parent=OE9A109678;Name=OE9A109678T1;product=OE9A109678P1;Description=cyclin-dependent kinase inhibitor 7-like;Ontology_term=GO:0004861%2C GO:0005634%2C GO:0007050%2C GO:0045859
OE9A040930	4.95191	2.43304	0.866841	2.80678	0.00500388	0.0252785	ID=OE9A040930T1;Parent=OE9A040930;Name=OE9A040930T1;product=OE9A040930P1
OE9A080940	4.93392	2.42769	0.963074	2.52077	0.0117097	0.049985	ID=OE9A080940T1;Parent=OE9A080940;Name=OE9A080940T1;product=OE9A080940P1;Description=ADP-ribosylation factor GTPase-activating AGD3-like;Ontology_term=GO:0005096%2C GO:0005829%2C GO:0005886%2C GO:0006897%2C GO:0009733%2C GO:0009965%2C GO:0010051%2C GO:0010087%2C GO:0030140%2C GO:0035091%2C GO:0043547
OE9A018718	5.54971	2.42666	0.787686	3.08075	0.00206482	0.0123469	ID=OE9A018718T1;Parent=OE9A018718;Name=OE9A018718T1;product=OE9A018718P1;Description=calcium calmodulin-regulated receptor-like kinase 2;Ontology_term=GO:0004672%2C GO:0005524%2C GO:0006468%2C GO:0016021
OE9A014307	16.0425	2.42386	0.465806	5.20358	1.95483e-07	3.36445e-06	ID=OE9A014307T1;Parent=OE9A014307;Name=OE9A014307T1;product=OE9A014307P1;Description=peptidyl-prolyl cis-trans isomerase CYP20-1;Ontology_term=GO:0000413%2C GO:0003755%2C GO:0006457
OE9A074219	250.898	2.42102	0.421187	5.7481	9.02543e-09	1.97024e-07	ID=OE9A074219T1;Parent=OE9A074219;Name=OE9A074219T1;product=OE9A074219P1;Description=glucan endo-1,3-beta-glucosidase 14;Ontology_term=GO:0004553%2C GO:0005975%2C GO:0030247%2C GO:0044424%2C GO:0046658
OE9A112840	4.90398	2.42097	0.9688	2.49894	0.0124566	0.0524118	ID=OE9A112840T1;Parent=OE9A112840;Name=OE9A112840T1;product=OE9A112840P1;Description=squalene monooxygenase-like;Ontology_term=GO:0004506%2C GO:0009414%2C GO:0016021%2C GO:0016114%2C GO:0016126%2C GO:0050660%2C GO:0055114
OE9A118632	3061.95	2.41663	0.185109	13.0552	5.93602e-39	2.80222e-36	ID=OE9A118632T1;Parent=OE9A118632;Name=OE9A118632T1;product=OE9A118632P1;Description=LOV domain-containing;Ontology_term=GO:0005515
OE9A104244	97.9377	2.41466	0.425649	5.67289	1.40406e-08	2.96468e-07	ID=OE9A104244T1;Parent=OE9A104244;Name=OE9A104244T1;product=OE9A104244P1;Description=scopoletin glucosyltransferase-like;Ontology_term=GO:0009813%2C GO:0043231%2C GO:0052696%2C GO:0080043%2C GO:0080044
OE9A037061	20.0549	2.41272	0.635365	3.79737	0.000146239	0.00128847	ID=OE9A037061T1;Parent=OE9A037061;Name=OE9A037061T1;product=OE9A037061P1;Description=embryo defective 1144 (c4973), partial;Ontology_term=GO:0000162%2C GO:0004107%2C GO:0006571%2C GO:0009094
OE9A031211	12.504	2.40842	0.830515	2.89992	0.00373261	0.0201214	ID=OE9A031211T1;Parent=OE9A031211;Name=OE9A031211T1;product=OE9A031211P1;Description=G-type lectin S-receptor-like serine threonine- kinase At4g27290 isoform X2;Ontology_term=GO:0004674%2C GO:0005524%2C GO:0005886%2C GO:0006468%2C GO:0006952%2C GO:0009069%2C GO:0009506%2C GO:0016021%2C GO:0030246%2C GO:0048544
OE9A066946	236.015	2.40412	0.219767	10.9394	7.47085e-28	1.59274e-25	ID=OE9A066946T2;Parent=OE9A066946;Name=OE9A066946T2;product=OE9A066946P2;Description=ACT domain-containing ACR11-like;Ontology_term=GO:0008152%2C GO:0016597
OE9A013283	17.8926	2.40177	0.509054	4.7181	2.38056e-06	3.28973e-05	ID=OE9A013283T1;Parent=OE9A013283;Name=OE9A013283T1;product=OE9A013283P1
OE9A076547	14.6453	2.39932	0.968251	2.47799	0.0132123	0.0548149	ID=OE9A076547T1;Parent=OE9A076547;Name=OE9A076547T1;product=OE9A076547P1;Description=1-aminocyclopropane-1-carboxylate oxidase;Ontology_term=GO:0009693%2C GO:0009815%2C GO:0009835%2C GO:0031418%2C GO:0046872%2C GO:0055114
OE9A004763	637.684	2.39888	0.389044	6.16609	6.9998e-10	1.86727e-08	ID=OE9A004763T1;Parent=OE9A004763;Name=OE9A004763T1;product=OE9A004763P1;Description=ferredoxin--nitrite reductase, chloroplastic;Ontology_term=GO:0020037%2C GO:0046872%2C GO:0048307%2C GO:0051539%2C GO:0055114
OE9A092465	2767.21	2.3964	0.144195	16.6191	5.06533e-62	9.5648e-59	ID=OE9A092465T1;Parent=OE9A092465;Name=OE9A092465T1;product=OE9A092465P1;Description=cytochrome P450 71A6-like;Ontology_term=GO:0005506%2C GO:0016705%2C GO:0020037%2C GO:0055114
OE9A019605	6.8562	2.3927	0.723542	3.30693	0.000943256	0.00640203	ID=OE9A019605T1;Parent=OE9A019605;Name=OE9A019605T1;product=OE9A019605P1;Description=calcium permeable stress-gated cation channel 1-like isoform X1;Ontology_term=GO:0016021
OE9A032037	127.315	2.39174	0.25564	9.3559	8.28905e-21	9.28514e-19	ID=OE9A032037T1;Parent=OE9A032037;Name=OE9A032037T1;product=OE9A032037P1;Description=elongation of fatty acids 3-like;Ontology_term=GO:0016021
OE9A087696	1092.92	2.39136	0.180885	13.2203	6.69911e-40	3.54196e-37	ID=OE9A087696T1;Parent=OE9A087696;Name=OE9A087696T1;product=OE9A087696P1;Description=late blight resistance homolog R1A-10;Ontology_term=GO:0043531
OE9A065574	12.1748	2.38702	0.690025	3.45932	0.000541544	0.00395695	ID=OE9A065574T1;Parent=OE9A065574;Name=OE9A065574T1;product=OE9A065574P1;Description=transcription factor GAMYB-like isoform X1;Ontology_term=GO:0003677%2C GO:0003824%2C GO:0008152
OE9A048629	126.362	2.38643	0.422543	5.64779	1.62519e-08	3.39364e-07	ID=OE9A048629T1;Parent=OE9A048629;Name=OE9A048629T1;product=OE9A048629P1;Description=oligopeptide transporter 4;Ontology_term=GO:0016021%2C GO:0055085
OE9A104914	596.173	2.38546	0.223996	10.6495	1.75219e-26	3.27621e-24	ID=OE9A104914T1;Parent=OE9A104914;Name=OE9A104914T1;product=OE9A104914P1
OE9A112950	6.94136	2.38455	0.899836	2.64999	0.00804943	0.0372866	ID=OE9A112950T1;Parent=OE9A112950;Name=OE9A112950T1;product=OE9A112950P1;Description=zinc finger 5;Ontology_term=GO:0003676%2C GO:0044763%2C GO:0046872%2C GO:0050789
OE9A049505	17.5241	2.38404	1.01592	2.34667	0.0189418	0.0727089	ID=OE9A049505T1;Parent=OE9A049505;Name=OE9A049505T1;product=OE9A049505P1;Description=ethylene-responsive transcription factor ABR1-like;Ontology_term=GO:0003677%2C GO:0003700%2C GO:0005667%2C GO:0006355%2C GO:0045449
OE9A001996	7.42993	2.38293	0.647498	3.68021	0.000233041	0.00192461	ID=OE9A001996T1;Parent=OE9A001996;Name=OE9A001996T1;product=OE9A001996P1;Description=vegetative incompatibility HET-E-1-like;Ontology_term=GO:0005515
OE9A049944	74.5259	2.37941	0.937609	2.53774	0.011157	0.0481783	ID=OE9A049944T1;Parent=OE9A049944;Name=OE9A049944T1;product=OE9A049944P1;Description=phenylalanine ammonia-lyase;Ontology_term=GO:0005737%2C GO:0006559%2C GO:0006570%2C GO:0009800%2C GO:0009821%2C GO:0045548
OE9A035916	59.7089	2.37822	0.63934	3.7198	0.000199381	0.00168505	ID=OE9A035916T1;Parent=OE9A035916;Name=OE9A035916T1;product=OE9A035916P1;Description=probable carboxylesterase 15;Ontology_term=GO:0008152%2C GO:0016787
OE9A071510	1093.59	2.37427	0.279983	8.48005	2.25092e-17	1.65753e-15	ID=OE9A071510T1;Parent=OE9A071510;Name=OE9A071510T1;product=OE9A071510P1;Description=linoleate 13S-lipoxygenase 2-1, chloroplastic-like;Ontology_term=GO:0005515%2C GO:0016702%2C GO:0031408%2C GO:0046872%2C GO:0055114
OE9A116782	104.33	2.372	0.776752	3.05374	0.00226007	0.0133302	ID=OE9A116782T1;Parent=OE9A116782;Name=OE9A116782T1;product=OE9A116782P1;Description=LEAF RUST 10 DISEASE-RESISTANCE LOCUS RECEPTOR-LIKE PROTEIN KINASE-like isoform X1;Ontology_term=GO:0004672%2C GO:0005524%2C GO:0006468%2C GO:0016020
OE9A096610	18.1547	2.36968	0.733521	3.23056	0.00123547	0.00805029	ID=OE9A096610T1;Parent=OE9A096610;Name=OE9A096610T1;product=OE9A096610P1;Description=premnaspirodiene oxygenase-like;Ontology_term=GO:0004497%2C GO:0005506%2C GO:0016021%2C GO:0016705%2C GO:0020037%2C GO:0055114
OE9A033424	8.81409	2.3686	0.959114	2.46957	0.0135277	0.0558431	ID=OE9A033424T1;Parent=OE9A033424;Name=OE9A033424T1;product=OE9A033424P1;Description=cytosolic sulfotransferase 5-like;Ontology_term=GO:0008146
OE9A041564	11.8001	2.36758	0.729535	3.24533	0.00117316	0.00770907	ID=OE9A041564T1;Parent=OE9A041564;Name=OE9A041564T1;product=OE9A041564P1;Description=dammarenediol II synthase-like;Ontology_term=GO:0016021%2C GO:0016866
OE9A001135	12.6528	2.36502	0.60892	3.88395	0.000102772	0.000947967	ID=OE9A001135T1;Parent=OE9A001135;Name=OE9A001135T1;product=OE9A001135P1;Description=probable LRR receptor-like serine threonine- kinase At1g56140;Ontology_term=GO:0004674%2C GO:0005886%2C GO:0009069%2C GO:0016310
OE9A084901	4.69052	2.365	0.937604	2.52238	0.0116563	0.0498327	ID=OE9A084901T1;Parent=OE9A084901;Name=OE9A084901T1;product=OE9A084901P1;Description=WUSCHEL-related homeobox 4;Ontology_term=GO:0003677
OE9A109217	6.93948	2.3636	0.903086	2.61725	0.00886407	0.0402423	ID=OE9A109217T1;Parent=OE9A109217;Name=OE9A109217T1;product=OE9A109217P1;Description=bark storage A;Ontology_term=GO:0003824%2C GO:0009116
OE9A068765	4.71475	2.3615	0.832373	2.83707	0.00455296	0.0234853	ID=OE9A068765T1;Parent=OE9A068765;Name=OE9A068765T1;product=OE9A068765P1;Description=3-phosphoglycerate kinase, partial;Ontology_term=GO:0004618%2C GO:0006094%2C GO:0006096%2C GO:0015976
OE9A116792	8.83642	2.36012	0.802304	2.94167	0.00326442	0.0180251	ID=OE9A116792T1;Parent=OE9A116792;Name=OE9A116792T1;product=OE9A116792P1;Description=homoserine kinase;Ontology_term=GO:0004413%2C GO:0005524%2C GO:0006544%2C GO:0006563%2C GO:0006566%2C GO:0016310
OE9A116835	57.463	2.35898	0.366985	6.42799	1.29299e-10	3.88868e-09	ID=OE9A116835T1;Parent=OE9A116835;Name=OE9A116835T1;product=OE9A116835P1
OE9A022054	616.159	2.35837	0.284205	8.29814	1.05756e-16	7.09585e-15	ID=OE9A022054T1;Parent=OE9A022054;Name=OE9A022054T1;product=OE9A022054P1
OE9A092293	9.49383	2.35652	0.81478	2.89222	0.00382536	0.0204835	ID=OE9A092293T1;Parent=OE9A092293;Name=OE9A092293T1;product=OE9A092293P1;Description=cytosolic sulfotransferase 5-like;Ontology_term=GO:0008146
OE9A095668	297.138	2.3563	0.802621	2.93576	0.00332737	0.0182646	ID=OE9A095668T1;Parent=OE9A095668;Name=OE9A095668T1;product=OE9A095668P1;Description=premnaspirodiene oxygenase-like;Ontology_term=GO:0004497%2C GO:0005506%2C GO:0016021%2C GO:0016705%2C GO:0020037%2C GO:0055114
OE9A056694	4.22405	2.35538	1.06457	2.21253	0.0269303	0.0952032	ID=OE9A056694T1;Parent=OE9A056694;Name=OE9A056694T1;product=OE9A056694P1;Description=serine threonine- kinase D6PKL2;Ontology_term=GO:0004674%2C GO:0005524%2C GO:0005730%2C GO:0005737%2C GO:0005886%2C GO:0006468%2C GO:0009069%2C GO:0035556
OE9A047532	1692.38	2.35341	0.206114	11.418	3.39971e-30	8.47875e-28	ID=OE9A047532T1;Parent=OE9A047532;Name=OE9A047532T1;product=OE9A047532P1;Description=F-box kelch-repeat At1g15670-like;Ontology_term=GO:0004842%2C GO:0005515%2C GO:0016567%2C GO:0031463
OE9A038571	6.54127	2.35236	1.0304	2.28295	0.0224331	0.0828387	ID=OE9A038571T1;Parent=OE9A038571;Name=OE9A038571T1;product=OE9A038571P1;Description=probable cytosolic oligopeptidase A;Ontology_term=GO:0004222%2C GO:0006508%2C GO:0006518%2C GO:0009507%2C GO:0046872
OE9A027745	4.47164	2.35168	0.854745	2.75132	0.00593557	0.0291145	ID=OE9A027745T1;Parent=OE9A027745;Name=OE9A027745T1;product=OE9A027745P1
OE9A008167	18.1799	2.35118	0.548924	4.28325	1.84185e-05	0.000206319	ID=OE9A008167T1;Parent=OE9A008167;Name=OE9A008167T1;product=OE9A008167P1;Description=lipid phosphate phosphatase 2-like;Ontology_term=GO:0005886%2C GO:0006687%2C GO:0008195%2C GO:0009395%2C GO:0016021%2C GO:0016311%2C GO:0046486
OE9A071683	26.2094	2.35109	0.376977	6.23669	4.46939e-10	1.23204e-08	ID=OE9A071683T1;Parent=OE9A071683;Name=OE9A071683T1;product=OE9A071683P1;Description=Vacuolar protein sorting-associated protein 54, chloroplastic
OE9A086304	551.605	2.35015	0.36795	6.38715	1.69003e-10	4.96419e-09	ID=OE9A086304T1;Parent=OE9A086304;Name=OE9A086304T1;product=OE9A086304P1;Description=phospholipase A1-Igamma3, chloroplastic;Ontology_term=GO:0004806%2C GO:0008970%2C GO:0009395%2C GO:0009507%2C GO:0046486%2C GO:0047714
OE9A032215	48.3459	2.34458	0.318036	7.37208	1.67982e-13	7.68241e-12	ID=OE9A032215T1;Parent=OE9A032215;Name=OE9A032215T1;product=OE9A032215P1;Description=DNA glycosylase superfamily isoform 1;Ontology_term=GO:0006284%2C GO:0008725
OE9A090761	229.879	2.34062	0.769183	3.04299	0.00234242	0.0137456	ID=OE9A090761T1;Parent=OE9A090761;Name=OE9A090761T1;product=OE9A090761P1;Description=premnaspirodiene oxygenase-like;Ontology_term=GO:0004497%2C GO:0005506%2C GO:0016705%2C GO:0020037%2C GO:0055114
OE9A093633	10.9302	2.33348	0.586851	3.97626	7.00068e-05	0.000675191	ID=OE9A093633T1;Parent=OE9A093633;Name=OE9A093633T1;product=OE9A093633P1;Description=ABC transporter B family member 15-like;Ontology_term=GO:0005524%2C GO:0016021%2C GO:0042626%2C GO:0055085
OE9A066966	9.59929	2.33169	0.755158	3.08769	0.00201721	0.0121142	ID=OE9A066966T1;Parent=OE9A066966;Name=OE9A066966T1;product=OE9A066966P1
OE9A005119	6.91429	2.32839	0.79481	2.92949	0.00339519	0.0185752	ID=OE9A005119T1;Parent=OE9A005119;Name=OE9A005119T1;product=OE9A005119P1
OE9A121970	47.5475	2.32388	0.670903	3.4638	0.000532593	0.00389693	ID=OE9A121970T1;Parent=OE9A121970;Name=OE9A121970T1;product=OE9A121970P1;Description=E3 ubiquitin- ligase PUB24-like;Ontology_term=GO:0004842%2C GO:0005488%2C GO:0016567
OE9A098440	51.0287	2.32336	0.356938	6.50916	7.55743e-11	2.36436e-09	ID=OE9A098440T1;Parent=OE9A098440;Name=OE9A098440T1;product=OE9A098440P1;Description=uncharacterized protein LOC111383688;Ontology_term=GO:0005515
OE9A055868	63.7667	2.32076	0.406745	5.70569	1.15875e-08	2.47637e-07	ID=OE9A055868T1;Parent=OE9A055868;Name=OE9A055868T1;product=OE9A055868P1;Description=dormancy-associated homolog 4-like;Ontology_term=GO:0016020
OE9A048337	4.35876	2.31999	0.926446	2.50418	0.0122735	0.0518311	ID=OE9A048337T1;Parent=OE9A048337;Name=OE9A048337T1;product=OE9A048337P1;Description=transcription factor bHLH18-like;Ontology_term=GO:0005488%2C GO:0008152%2C GO:0016491
OE9A100070	58.3894	2.31987	0.655072	3.5414	0.000398003	0.00305485	ID=OE9A100070T1;Parent=OE9A100070;Name=OE9A100070T1;product=OE9A100070P1
OE9A041309	21.3712	2.31702	0.588091	3.9399	8.15141e-05	0.000774868	ID=OE9A041309T1;Parent=OE9A041309;Name=OE9A041309T1;product=OE9A041309P1;Description=mavicyanin-like;Ontology_term=GO:0006118%2C GO:0009055%2C GO:0046658
OE9mt000012	28.2732	2.31612	0.768724	3.01294	0.00258732	0.0149472	ID=OE9mt000012T1;Parent=OE9mt000012;product=OE9mt000012P1;Description=nad1;Name=OE9mt000012T1
OE9A006536	43.8199	2.31362	0.309608	7.47273	7.85492e-14	3.73476e-12	ID=OE9A006536T1;Parent=OE9A006536;Name=OE9A006536T1;product=OE9A006536P1
OE9A081254	16.5347	2.31314	0.562057	4.11548	3.86367e-05	0.000397432	ID=OE9A081254T1;Parent=OE9A081254;Name=OE9A081254T1;product=OE9A081254P1;Description=triose phosphate phosphate translocator, non-green plastid, chloroplastic-like;Ontology_term=GO:0005739%2C GO:0009941%2C GO:0015120%2C GO:0015121%2C GO:0015713%2C GO:0016021%2C GO:0034219%2C GO:0089722
OE9A014162	82.8754	2.30941	0.875397	2.63813	0.00833658	0.0383413	ID=OE9A014162T1;Parent=OE9A014162;Name=OE9A014162T1;product=OE9A014162P1
OE9A051438	422.615	2.30794	0.802275	2.87674	0.00401802	0.0213208	ID=OE9A051438T1;Parent=OE9A051438;Name=OE9A051438T1;product=OE9A051438P1;Description=pathogenesis-related STH-2-like;Ontology_term=GO:0006952%2C GO:0009607
OE9A114858	197.441	2.30727	0.264128	8.73544	2.42709e-18	2.07646e-16	ID=OE9A114858T1;Parent=OE9A114858;Name=OE9A114858T1;product=OE9A114858P1;Description=UDP-glucuronic acid decarboxylase 2-like;Ontology_term=GO:0016021
OE9A040743	215.365	2.30704	0.244609	9.43157	4.03989e-21	4.64342e-19	ID=OE9A040743T1;Parent=OE9A040743;Name=OE9A040743T1;product=OE9A040743P1
OE9A067971	288.389	2.30667	0.379946	6.07104	1.27087e-09	3.25234e-08	ID=OE9A067971T1;Parent=OE9A067971;Name=OE9A067971T1;product=OE9A067971P1
OE9A031116	8.14419	2.30639	0.951123	2.42492	0.0153119	0.0615923	ID=OE9A031116T1;Parent=OE9A031116;Name=OE9A031116T1;product=OE9A031116P1;Description=G-type lectin S-receptor-like serine threonine- kinase At4g27290 isoform X1;Ontology_term=GO:0004674%2C GO:0009069%2C GO:0016310
OE9A056606	545.279	2.30465	0.518695	4.44316	8.86475e-06	0.000107648	ID=OE9A056606T1;Parent=OE9A056606;Name=OE9A056606T1;product=OE9A056606P1;Description=arginine decarboxylase-like;Ontology_term=GO:0006527%2C GO:0006560%2C GO:0008295%2C GO:0008792
OE9A042409	188.725	2.30092	0.281104	8.1853	2.71631e-16	1.70566e-14	ID=OE9A042409T5;Parent=OE9A042409;Name=OE9A042409T5;product=OE9A042409P2;Description=70 kDa peptidyl-prolyl isomerase-like;Ontology_term=GO:0000413%2C GO:0003755%2C GO:0005515%2C GO:0005528%2C GO:0005789%2C GO:0061077
OE9A043994	49.9438	2.30014	0.452222	5.0863	3.65122e-07	5.97669e-06	ID=OE9A043994T1;Parent=OE9A043994;Name=OE9A043994T1;product=OE9A043994P1;Description=receptor like 42-like;Ontology_term=GO:0005515
OE9A072359	5.59461	2.29928	0.860268	2.67275	0.00752325	0.0352695	ID=OE9A072359T1;Parent=OE9A072359;Name=OE9A072359T1;product=OE9A072359P1;Description=aluminum-activated malate transporter 13-like;Ontology_term=GO:0009705%2C GO:0015140%2C GO:0015743
OE9A085351	9.0402	2.29775	0.903973	2.54184	0.0110271	0.0477421	ID=OE9A085351T1;Parent=OE9A085351;Name=OE9A085351T1;product=OE9A085351P1
OE9A101474	53.5882	2.29435	0.988068	2.32205	0.0202301	0.0763893	ID=OE9A101474T1;Parent=OE9A101474;Name=OE9A101474T1;product=OE9A101474P1;Description=ubiquinol oxidase 2, mitochondrial-like isoform X2;Ontology_term=GO:0006118%2C GO:0009916%2C GO:0016021%2C GO:0046872%2C GO:0055114%2C GO:0070469
OE9A073924	7.5029	2.29278	0.634557	3.61319	0.000302447	0.0024141	ID=OE9A073924T1;Parent=OE9A073924;Name=OE9A073924T1;product=OE9A073924P1;Description=inositol transporter 4;Ontology_term=GO:0005351%2C GO:0005355%2C GO:0005887%2C GO:0015992%2C GO:0046323%2C GO:1904659
OE9A095147	49.9939	2.29083	0.95644	2.39517	0.0166128	0.0656563	ID=OE9A095147T1;Parent=OE9A095147;Name=OE9A095147T1;product=OE9A095147P1;Description=phenylalanine ammonia-lyase;Ontology_term=GO:0005737%2C GO:0006559%2C GO:0006570%2C GO:0009800%2C GO:0009821%2C GO:0045548
OE9A085084	406.887	2.28999	0.714219	3.20628	0.00134464	0.00863837	ID=OE9A085084T1;Parent=OE9A085084;Name=OE9A085084T1;product=OE9A085084P1;Description=(-)-isopiperitenol (-)-carveol dehydrogenase, mitochondrial-like;Ontology_term=GO:0016491
OE9A047489	16.1566	2.28838	0.596593	3.83575	0.000125182	0.00112485	ID=OE9A047489T1;Parent=OE9A047489;Name=OE9A047489T1;product=OE9A047489P1;Description=ammonium transporter 1 member 3;Ontology_term=GO:0008519%2C GO:0016021%2C GO:0072488
OE9A074535	4.35958	2.288	0.836931	2.73379	0.00626097	0.0303849	ID=OE9A074535T1;Parent=OE9A074535;Name=OE9A074535T1;product=OE9A074535P1;Description=late blight resistance homolog R1A-3;Ontology_term=GO:0043531
OE9A061546	12.9895	2.28612	0.653052	3.50067	0.000464088	0.00348046	ID=OE9A061546T1;Parent=OE9A061546;Name=OE9A061546T1;product=OE9A061546P1;Description=methyl- -binding domain-containing 2-like;Ontology_term=GO:0000122%2C GO:0005634%2C GO:0006346%2C GO:0008270%2C GO:0008327
OE9A012161	36.1127	2.28042	0.846487	2.69398	0.00706037	0.0335516	ID=OE9A012161T1;Parent=OE9A012161;Name=OE9A012161T1;product=OE9A012161P1;Description=vinorine synthase-like;Ontology_term=GO:0016747
OE9A048965	112.261	2.27817	0.367998	6.19072	5.98908e-10	1.61394e-08	ID=OE9A048965T1;Parent=OE9A048965;Name=OE9A048965T1;product=OE9A048965P1;Description=ammonium transporter 3 member 1-like;Ontology_term=GO:0005887%2C GO:0008519%2C GO:0015695%2C GO:0019740%2C GO:0072488
OE9A051211	1012.73	2.27809	0.857081	2.65796	0.00786149	0.0365505	ID=OE9A051211T1;Parent=OE9A051211;Name=OE9A051211T1;product=OE9A051211P1;Description=beta-glucosidase-like;Ontology_term=GO:0004553%2C GO:0005975
OE9A052399	43.8511	2.27775	0.585497	3.89028	0.000100129	0.000927472	ID=OE9A052399T1;Parent=OE9A052399;Name=OE9A052399T1;product=OE9A052399P1;Description=LYK2;Ontology_term=GO:0004672%2C GO:0005524%2C GO:0006468%2C GO:0016020
OE9A052051	6.81277	2.27421	0.659228	3.44981	0.000560979	0.00407307	ID=OE9A052051T1;Parent=OE9A052051;Name=OE9A052051T1;product=OE9A052051P1;Description=DETOXIFICATION 27-like;Ontology_term=GO:0006855%2C GO:0015238%2C GO:0015297%2C GO:0016021
OE9A009378	4175.92	2.2735	0.375433	6.05566	1.39839e-09	3.54099e-08	ID=OE9A009378T1;Parent=OE9A009378;Name=OE9A009378T1;product=OE9A009378P1;Description=secoisolariciresinol dehydrogenase-like;Ontology_term=GO:0016491
OE9A070518	420.114	2.26959	0.711995	3.18765	0.00143432	0.00910389	ID=OE9A070518T1;Parent=OE9A070518;Name=OE9A070518T1;product=OE9A070518P1;Description=acidic mammalian chitinase-like;Ontology_term=GO:0004568%2C GO:0005576%2C GO:0005975%2C GO:0006032%2C GO:0008061%2C GO:0016998
OE9A114568	7.8043	2.26819	0.630525	3.59731	0.000321526	0.00254274	ID=OE9A114568T1;Parent=OE9A114568;Name=OE9A114568T1;product=OE9A114568P1
OE9A087291	28.6597	2.26804	0.792423	2.86215	0.00420772	0.0221056	ID=OE9A087291T1;Parent=OE9A087291;Name=OE9A087291T1;product=OE9A087291P1;Description=probable calcium-binding CML44;Ontology_term=GO:0005509
OE9A042037	55.5615	2.26503	0.767988	2.9493	0.00318492	0.0176884	ID=OE9A042037T1;Parent=OE9A042037;Name=OE9A042037T1;product=OE9A042037P1;Description=vetispiradiene synthase 2-like;Ontology_term=GO:0000287%2C GO:0008152%2C GO:0010333
OE9A024145	32.6443	2.26497	0.844992	2.68047	0.00735194	0.0346243	ID=OE9A024145T1;Parent=OE9A024145;Name=OE9A024145T1;product=OE9A024145P1
OE9A086043	290.804	2.2642	0.260283	8.69902	3.34776e-18	2.80067e-16	ID=OE9A086043T2;Parent=OE9A086043;Name=OE9A086043T2;product=OE9A086043P2;Description=pentatricopeptide repeat-containing At2g35130;Ontology_term=GO:0005515%2C GO:0005960%2C GO:0019464
OE9A107234	8.43235	2.26064	0.952406	2.37361	0.0176153	0.0687957	ID=OE9A107234T1;Parent=OE9A107234;Name=OE9A107234T1;product=OE9A107234P1;Description=zinc finger CCCH domain-containing 39-like;Ontology_term=GO:0046872
OE9A025781	10.9175	2.25637	0.750412	3.00684	0.00263978	0.0151972	ID=OE9A025781T1;Parent=OE9A025781;Name=OE9A025781T1;product=OE9A025781P1;Description=cyclin-dependent kinase inhibitor 7;Ontology_term=GO:0004861%2C GO:0005634%2C GO:0007050%2C GO:0045859
OE9A077155	55.0441	2.25294	0.522518	4.3117	1.62002e-05	0.00018436	ID=OE9A077155T1;Parent=OE9A077155;Name=OE9A077155T1;product=OE9A077155P1
OE9A094143	15.2703	2.2513	0.934704	2.40858	0.0160149	0.0637701	ID=OE9A094143T1;Parent=OE9A094143;Name=OE9A094143T1;product=OE9A094143P1;Description=probable WRKY transcription factor 40;Ontology_term=GO:0003700%2C GO:0005667%2C GO:0006355%2C GO:0043565%2C GO:0045449
OE9A025067	14.4398	2.25054	0.645176	3.48826	0.000486167	0.00361121	ID=OE9A025067T1;Parent=OE9A025067;Name=OE9A025067T1;product=OE9A025067P1;Description=probable LRR receptor-like serine threonine- kinase At3g47570;Ontology_term=GO:0004672%2C GO:0005515%2C GO:0005524%2C GO:0006468%2C GO:0016020
OE9A006503	265.711	2.24983	0.198937	11.3092	1.18125e-29	2.78818e-27	ID=OE9A006503T1;Parent=OE9A006503;Name=OE9A006503T1;product=OE9A006503P1;Description=EARLY FLOWERING 4;Ontology_term=GO:0005634%2C GO:0009649%2C GO:0009909%2C GO:0010017%2C GO:0010114%2C GO:0042753%2C GO:0042803%2C GO:0048573
OE9A045797	5.66843	2.24793	0.666451	3.37298	0.000743584	0.00521554	ID=OE9A045797T1;Parent=OE9A045797;Name=OE9A045797T1;product=OE9A045797P1;Description=probable disulfide-isomerase A6;Ontology_term=GO:0003756%2C GO:0005774%2C GO:0005783%2C GO:0006457%2C GO:0009505%2C GO:0009553%2C GO:0009567%2C GO:0009793%2C GO:0034976%2C GO:0045454%2C GO:0048868
OE9A091161	60.5747	2.24257	0.405661	5.52819	3.23559e-08	6.44096e-07	ID=OE9A091161T1;Parent=OE9A091161;Name=OE9A091161T1;product=OE9A091161P1;Description=homeobox-leucine zipper ATHB-52-like;Ontology_term=GO:0006355%2C GO:0043565
OE9A090482	12.8384	2.2417	0.590814	3.79426	0.000148083	0.00130187	ID=OE9A090482T1;Parent=OE9A090482;Name=OE9A090482T1;product=OE9A090482P1
OE9A027231	63.9918	2.23701	0.445231	5.02438	5.05062e-07	8.05296e-06	ID=OE9A027231T1;Parent=OE9A027231;Name=OE9A027231T1;product=OE9A027231P1;Description=sulfate transporter -like;Ontology_term=GO:0005887%2C GO:0008271%2C GO:1902358
OE9A087839	156.085	2.2346	0.17437	12.8153	1.34675e-37	5.65123e-35	ID=OE9A087839T1;Parent=OE9A087839;Name=OE9A087839T1;product=OE9A087839P1;Description=non-structural maintenance of chromosomes element 1 homolog;Ontology_term=GO:0000724%2C GO:0004842%2C GO:0005634%2C GO:0006301%2C GO:0016567%2C GO:0030915
OE9A059109	25.9048	2.23262	0.498704	4.47685	7.57536e-06	9.38436e-05	ID=OE9A059109T3;Parent=OE9A059109;Name=OE9A059109T3;product=OE9A059109P3
OE9A035152	13.7444	2.23173	0.493937	4.51824	6.23552e-06	7.85712e-05	ID=OE9A035152T2;Parent=OE9A035152;Name=OE9A035152T2;product=OE9A035152P1;Description=Heat shock factor HSF30;Ontology_term=GO:0003700%2C GO:0005634%2C GO:0005667%2C GO:0006355%2C GO:0006950%2C GO:0009628%2C GO:0043565%2C GO:0045449
OE9A062646	10.2465	2.22948	0.676638	3.29493	0.000984449	0.00663224	ID=OE9A062646T1;Parent=OE9A062646;Name=OE9A062646T1;product=OE9A062646P1;Description=cysteine-rich receptor kinase 2;Ontology_term=GO:0004674%2C GO:0005524%2C GO:0005886%2C GO:0006468%2C GO:0006952%2C GO:0009069%2C GO:0009506%2C GO:0016021
OE9A040511	32.3103	2.22848	0.509599	4.37301	1.22543e-05	0.000143661	ID=OE9A040511T1;Parent=OE9A040511;Name=OE9A040511T1;product=OE9A040511P1
OE9A047084	1555.87	2.22774	0.769027	2.89684	0.00376947	0.0202787	ID=OE9A047084T1;Parent=OE9A047084;Name=OE9A047084T1;product=OE9A047084P1;Description=pathogenesis-related STH-2-like;Ontology_term=GO:0006952%2C GO:0009607
OE9A110422	19.6378	2.22664	0.901041	2.47119	0.0134664	0.0556682	ID=OE9A110422T1;Parent=OE9A110422;Name=OE9A110422T1;product=OE9A110422P1
OE9A038679	536.3	2.21925	0.363787	6.10042	1.05793e-09	2.75812e-08	ID=OE9A038679T1;Parent=OE9A038679;Name=OE9A038679T1;product=OE9A038679P1;Description=phospholipase A1-Igamma3, chloroplastic;Ontology_term=GO:0004806%2C GO:0008970%2C GO:0009395%2C GO:0009507%2C GO:0046486%2C GO:0047714
OE9A065575	156.332	2.21564	0.451108	4.91156	9.03546e-07	1.36541e-05	ID=OE9A065575T1;Parent=OE9A065575;Name=OE9A065575T1;product=OE9A065575P1;Description=lysine histidine transporter 1-like;Ontology_term=GO:0016021
OE9A110242	46.5895	2.21486	0.586916	3.77373	0.000160826	0.00139442	ID=OE9A110242T1;Parent=OE9A110242;Name=OE9A110242T1;product=OE9A110242P1;Description=callose synthase 12;Ontology_term=GO:0000003%2C GO:0000148%2C GO:0003843%2C GO:0005794%2C GO:0005982%2C GO:0005985%2C GO:0006075%2C GO:0009506%2C GO:0009555%2C GO:0009870%2C GO:0009965%2C GO:0010150%2C GO:0016021%2C GO:0042742%2C GO:0050832%2C GO:0052544
OE9A059292	102.256	2.21313	0.301284	7.34565	2.04758e-13	9.25298e-12	ID=OE9A059292T1;Parent=OE9A059292;Name=OE9A059292T1;product=OE9A059292P1
OE9A111735	10.9358	2.20891	0.561606	3.93321	8.38192e-05	0.000794779	ID=OE9A111735T1;Parent=OE9A111735;Name=OE9A111735T1;product=OE9A111735P1;Description=chaperone dnaJ C76, chloroplastic-like;Ontology_term=GO:0016020
OE9A118680	44.2022	2.20883	0.367614	6.00854	1.87199e-09	4.60532e-08	ID=OE9A118680T1;Parent=OE9A118680;Name=OE9A118680T1;product=OE9A118680P1;Description=katanin p80 WD40 repeat-containing subunit B1 homolog isoform X1;Ontology_term=GO:0005737%2C GO:0015630%2C GO:0044430
OE9A042822	5.88161	2.20782	0.841026	2.62515	0.00866118	0.0395316	ID=OE9A042822T1;Parent=OE9A042822;Name=OE9A042822T1;product=OE9A042822P1;Description=auxin-responsive SAUR32-like;Ontology_term=GO:0009733
OE9A070761	69204.1	2.20718	0.611878	3.60722	0.000309489	0.00246213	ID=OE9A070761T1;Parent=OE9A070761;Name=OE9A070761T1;product=OE9A070761P1
OE9A106246	455.651	2.20553	0.573712	3.84432	0.000120889	0.00109259	ID=OE9A106246T1;Parent=OE9A106246;Name=OE9A106246T1;product=OE9A106246P1;Description=glucan endo-1,3-beta-glucosidase, acidic-like;Ontology_term=GO:0004553%2C GO:0005975
OE9A002043	410.735	2.20532	0.308596	7.14632	8.91327e-13	3.67027e-11	ID=OE9A002043T1;Parent=OE9A002043;Name=OE9A002043T1;product=OE9A002043P1;Description=acid phosphatase 1-like;Ontology_term=GO:0003993%2C GO:0006771%2C GO:0019497
OE9A045303	24.4901	2.20522	0.73293	3.00877	0.00262305	0.0151173	ID=OE9A045303T1;Parent=OE9A045303;Name=OE9A045303T1;product=OE9A045303P1;Description=cytochrome P450 84A1-like;Ontology_term=GO:0004497%2C GO:0005506%2C GO:0016021%2C GO:0016705%2C GO:0020037%2C GO:0055114
OE9A020054	150.292	2.20498	0.427627	5.15632	2.51854e-07	4.25296e-06	ID=OE9A020054T1;Parent=OE9A020054;Name=OE9A020054T1;product=OE9A020054P1;Description=scopoletin glucosyltransferase-like;Ontology_term=GO:0009813%2C GO:0043231%2C GO:0052696%2C GO:0080043%2C GO:0080044
OE9A029214	6.55672	2.20406	0.820439	2.68644	0.00722182	0.0341531	ID=OE9A029214T1;Parent=OE9A029214;Name=OE9A029214T1;product=OE9A029214P1;Description=hexokinase-1;Ontology_term=GO:0001678%2C GO:0004340%2C GO:0005524%2C GO:0005536%2C GO:0005829%2C GO:0005982%2C GO:0005985%2C GO:0006000%2C GO:0006012%2C GO:0006013%2C GO:0006094%2C GO:0006096%2C GO:0008865%2C GO:0009707%2C GO:0016021%2C GO:0019158%2C GO:0019872%2C GO:0046835%2C GO:0051156
OE9A010646	35.5982	2.20384	0.965019	2.28372	0.0223879	0.0826949	ID=OE9A010646T1;Parent=OE9A010646;Name=OE9A010646T1;product=OE9A010646P1;Description=ethylene-responsive transcription factor ABR1-like;Ontology_term=GO:0003677%2C GO:0003700%2C GO:0005667%2C GO:0006355%2C GO:0045449
OE9A121975	26.5235	2.20307	0.641446	3.43454	0.000593565	0.00428963	ID=OE9A121975T1;Parent=OE9A121975;Name=OE9A121975T1;product=OE9A121975P1;Description=LRR receptor-like serine threonine- kinase GSO1;Ontology_term=GO:0005515
OE9A039213	127.258	2.20206	0.447734	4.91825	8.7323e-07	1.32139e-05	ID=OE9A039213T1;Parent=OE9A039213;Name=OE9A039213T1;product=OE9A039213P1;Description=LRR receptor-like serine threonine- kinase GSO1;Ontology_term=GO:0005515
OE9A003657	268.433	2.20197	0.316404	6.95937	3.41805e-12	1.30014e-10	ID=OE9A003657T1;Parent=OE9A003657;Name=OE9A003657T1;product=OE9A003657P1;Description=ammonium transporter 3 member 1-like;Ontology_term=GO:0005887%2C GO:0008519%2C GO:0015695%2C GO:0019740%2C GO:0072488
OE9A068315	7.87299	2.20035	0.699271	3.14664	0.00165159	0.0102492	ID=OE9A068315T1;Parent=OE9A068315;Name=OE9A068315T1;product=OE9A068315P1;Description=BON1-associated 2;Ontology_term=GO:0005515
OE9A010385	7.5681	2.19867	0.820554	2.67949	0.00737342	0.0347093	ID=OE9A010385T1;Parent=OE9A010385;Name=OE9A010385T1;product=OE9A010385P1;Description=O-glucosyltransferase 1-like;Ontology_term=GO:0006664%2C GO:0012505%2C GO:0016020%2C GO:0046527
OE9A077396	74.5757	2.19666	0.419211	5.23999	1.60587e-07	2.81517e-06	ID=OE9A077396T1;Parent=OE9A077396;Name=OE9A077396T1;product=OE9A077396P1;Description=BTB POZ and TAZ domain-containing 1-like;Ontology_term=GO:0005515
OE9A066103	279.85	2.19592	0.147566	14.881	4.38045e-50	3.99316e-47	ID=OE9A066103T1;Parent=OE9A066103;Name=OE9A066103T1;product=OE9A066103P1;Description=Phosphoglycerate mutase;Ontology_term=GO:0005829%2C GO:0016311%2C GO:0016791
OE9A040680	296.568	2.19414	0.433411	5.06249	4.13826e-07	6.7116e-06	ID=OE9A040680T1;Parent=OE9A040680;Name=OE9A040680T1;product=OE9A040680P1;Description=salicylic acid-binding 2-like;Ontology_term=GO:0016787
OE9A003255	4.69548	2.192	0.830771	2.63851	0.00832718	0.0383114	ID=OE9A003255T1;Parent=OE9A003255;Name=OE9A003255T1;product=OE9A003255P1;Description=GATA transcription factor 12-like;Ontology_term=GO:0000785%2C GO:0000977%2C GO:0001085%2C GO:0001228%2C GO:0003682%2C GO:0005634%2C GO:0005667%2C GO:0008270%2C GO:0030154%2C GO:0045893
OE9A103114	19.886	2.19172	0.534147	4.10322	4.07441e-05	0.000416174	ID=OE9A103114T1;Parent=OE9A103114;Name=OE9A103114T1;product=OE9A103114P1
OE9A017599	27.9973	2.18955	0.821268	2.66606	0.00767456	0.0358707	ID=OE9A017599T1;Parent=OE9A017599;Name=OE9A017599T1;product=OE9A017599P1;Description=probable calcium-binding CML44;Ontology_term=GO:0005509
OE9A072671	13.6921	2.18775	0.610841	3.58154	0.000341572	0.00268402	ID=OE9A072671T1;Parent=OE9A072671;Name=OE9A072671T1;product=OE9A072671P1
OE9A107999	293.383	2.18737	0.407864	5.36299	8.18563e-08	1.52606e-06	ID=OE9A107999T1;Parent=OE9A107999;Name=OE9A107999T1;product=OE9A107999P1;Description=phospholipase A1-IIdelta-like;Ontology_term=GO:0006629%2C GO:0016787
OE9A056870	4.61259	2.1855	0.991753	2.20367	0.0275474	0.0968149	ID=OE9A056870T1;Parent=OE9A056870;Name=OE9A056870T1;product=OE9A056870P1;Description=leucine-rich repeat receptor kinase PXL1;Ontology_term=GO:0004672%2C GO:0005524%2C GO:0006468
OE9A038638	4.70923	2.18496	0.821491	2.65976	0.00781975	0.0364111	ID=OE9A038638T1;Parent=OE9A038638;Name=OE9A038638T1;product=OE9A038638P1
OE9A038360	941.287	2.18465	0.391336	5.58255	2.37015e-08	4.82349e-07	ID=OE9A038360T1;Parent=OE9A038360;Name=OE9A038360T1;product=OE9A038360P1;Description=nitrate reductase;Ontology_term=GO:0006809%2C GO:0009325%2C GO:0009703%2C GO:0020037%2C GO:0030151%2C GO:0042128%2C GO:0043546%2C GO:0050464%2C GO:0055114
OE9A000309	8.97193	2.18211	0.941671	2.31727	0.0204888	0.0770692	ID=OE9A000309T1;Parent=OE9A000309;Name=OE9A000309T1;product=OE9A000309P1
OE9A030275	1354.72	2.1819	0.162116	13.4589	2.73078e-41	1.67886e-38	ID=OE9A030275T1;Parent=OE9A030275;Name=OE9A030275T1;product=OE9A030275P1;Description=NRT1 PTR FAMILY -like;Ontology_term=GO:0005215%2C GO:0006857%2C GO:0016021
OE9A022915	4.50285	2.17578	0.988183	2.20179	0.0276799	0.0971387	ID=OE9A022915T1;Parent=OE9A022915;Name=OE9A022915T1;product=OE9A022915P1;Description=calcineurin subunit B-like;Ontology_term=GO:0005509
OE9A015141	13.5561	2.17295	0.756658	2.87178	0.00408173	0.0215873	ID=OE9A015141T1;Parent=OE9A015141;Name=OE9A015141T1;product=OE9A015141P1;Description=fructose-bisphosphate aldolase, cytoplasmic isozyme 1;Ontology_term=GO:0004332%2C GO:0006000%2C GO:0006013%2C GO:0006020%2C GO:0006094%2C GO:0006096%2C GO:0006098%2C GO:0015976
OE9A087077	56.2089	2.1725	0.45298	4.79602	1.61848e-06	2.32407e-05	ID=OE9A087077T1;Parent=OE9A087077;Name=OE9A087077T1;product=OE9A087077P1;Description=mechanosensitive ion channel 10-like;Ontology_term=GO:0016021%2C GO:0055085
OE9A117672	241.865	2.16841	0.953863	2.27329	0.0230084	0.0845145	ID=OE9A117672T1;Parent=OE9A117672;Name=OE9A117672T1;product=OE9A117672P1;Description=beta-glucosidase-like;Ontology_term=GO:0004553%2C GO:0005975
OE9A035534	6993.68	2.16516	0.256817	8.43075	3.43465e-17	2.47407e-15	ID=OE9A035534T1;Parent=OE9A035534;Name=OE9A035534T1;product=OE9A035534P1
OE9A006987	73.3906	2.16429	0.825998	2.62021	0.0087875	0.0399701	ID=OE9A006987T1;Parent=OE9A006987;Name=OE9A006987T1;product=OE9A006987P1
OE9A110382	28.3913	2.16423	0.511699	4.2295	2.34207e-05	0.000255424	ID=OE9A110382T1;Parent=OE9A110382;Name=OE9A110382T1;product=OE9A110382P1;Description=probable carboxylesterase 120;Ontology_term=GO:0008152%2C GO:0016787
OE9A114837	12.4713	2.16055	0.571161	3.78272	0.000155121	0.00135295	ID=OE9A114837T1;Parent=OE9A114837;Name=OE9A114837T1;product=OE9A114837P1
OE9A114407	142.635	2.15968	0.405212	5.32974	9.83561e-08	1.8019e-06	ID=OE9A114407T1;Parent=OE9A114407;Name=OE9A114407T1;product=OE9A114407P1;Description=secoisolariciresinol dehydrogenase-like;Ontology_term=GO:0016491
OE9A104692	531.285	2.15801	0.128754	16.7606	4.73561e-63	9.63004e-60	ID=OE9A104692T1;Parent=OE9A104692;Name=OE9A104692T1;product=OE9A104692P1;Description=cyclic nucleotide-gated ion channel 15;Ontology_term=GO:0005249%2C GO:0008076%2C GO:0042391%2C GO:0071805
OE9A064513	23.8617	2.15642	0.768863	2.80469	0.00503655	0.0253999	ID=OE9A064513T1;Parent=OE9A064513;Name=OE9A064513T1;product=OE9A064513P1;Description=GDSL esterase lipase At5g14450-like;Ontology_term=GO:0016788
OE9A089296	8.80476	2.15438	0.775695	2.77736	0.00548032	0.0272942	ID=OE9A089296T1;Parent=OE9A089296;Name=OE9A089296T1;product=OE9A089296P1;Description=cytochrome P450 704C1-like;Ontology_term=GO:0004497%2C GO:0005506%2C GO:0016021%2C GO:0016705%2C GO:0020037%2C GO:0055114
OE9A078880	270.372	2.1537	0.357485	6.02458	1.69549e-09	4.20865e-08	ID=OE9A078880T1;Parent=OE9A078880;Name=OE9A078880T1;product=OE9A078880P1;Description=multicopper oxidase LPR1-like;Ontology_term=GO:0005507%2C GO:0016491%2C GO:0055114
OE9A010091	457.178	2.15283	0.309191	6.96278	3.33618e-12	1.27082e-10	ID=OE9A010091T1;Parent=OE9A010091;Name=OE9A010091T1;product=OE9A010091P1;Description=bifunctional 3-dehydroquinate dehydratase shikimate dehydrogenase, chloroplastic isoform X3;Ontology_term=GO:0000162%2C GO:0003855%2C GO:0004764%2C GO:0006571%2C GO:0009094%2C GO:0019632%2C GO:0050661%2C GO:0055114
OE9A117209	12.6504	2.1504	0.857276	2.50841	0.0121274	0.0513372	ID=OE9A117209T1;Parent=OE9A117209;Name=OE9A117209T1;product=OE9A117209P1
OE9A107224	28.9471	2.14639	0.518973	4.13585	3.53649e-05	0.000367061	ID=OE9A107224T1;Parent=OE9A107224;Name=OE9A107224T1;product=OE9A107224P1;Description=ankyrin repeat RF_0381;Ontology_term=GO:0005515
OE9A011244	612.511	2.14588	0.433573	4.9493	7.44792e-07	1.15075e-05	ID=OE9A011244T1;Parent=OE9A011244;Name=OE9A011244T1;product=OE9A011244P1;Description=SNAP25 homologous SNAP33-like;Ontology_term=GO:0005515
OE9A055668	32.3889	2.14585	0.666563	3.21928	0.00128513	0.00831061	ID=OE9A055668T1;Parent=OE9A055668;Name=OE9A055668T1;product=OE9A055668P1
OE9A063130	23.1756	2.1438	0.496312	4.31945	1.56416e-05	0.00017885	ID=OE9A063130T1;Parent=OE9A063130;Name=OE9A063130T1;product=OE9A063130P1
OE9A121533	6.27686	2.14247	0.906716	2.36289	0.0181331	0.0703294	ID=OE9A121533T1;Parent=OE9A121533;Name=OE9A121533T1;product=OE9A121533P1
OE9A043307	9.54412	2.13943	0.692987	3.08725	0.00202016	0.0121265	ID=OE9A043307T1;Parent=OE9A043307;Name=OE9A043307T1;product=OE9A043307P1;Description=(3S,6E)-nerolidol synthase 1-like isoform X1;Ontology_term=GO:0000287%2C GO:0008152%2C GO:0010333
OE9A003346	158.081	2.13818	0.535047	3.99624	6.43567e-05	0.00062572	ID=OE9A003346T1;Parent=OE9A003346;Name=OE9A003346T1;product=OE9A003346P1;Description=Serine threonine kinase;Ontology_term=GO:0004672%2C GO:0005509%2C GO:0005524%2C GO:0006468%2C GO:0030247
OE9mt000033	8.61777	2.13712	0.821706	2.60083	0.00929991	0.0418045	ID=OE9mt000033T1;Parent=OE9mt000033;product=OE9mt000033P1;Description=mttB;Name=OE9mt000033T1
OE9A065362	15.6553	2.13472	0.699064	3.05368	0.00226054	0.0133302	ID=OE9A065362T1;Parent=OE9A065362;Name=OE9A065362T1;product=OE9A065362P1
OE9A011676	9.13212	2.13433	0.778848	2.74037	0.00613701	0.0299056	ID=OE9A011676T1;Parent=OE9A011676;Name=OE9A011676T1;product=OE9A011676P1;Description=WD repeat-containing 44;Ontology_term=GO:0005515
OE9A080802	131.811	2.12995	0.28084	7.5842	3.34546e-14	1.66555e-12	ID=OE9A080802T1;Parent=OE9A080802;Name=OE9A080802T1;product=OE9A080802P1;md5=1860d9cbc11e00f3dd00120c7c0a53c7;INTERPRO=<table><tr><th>DB</th><th>ID</th><th>Description</th></tr><tr><td>Gene3D</td><td>G3DSA:3.80.10.10</td><td></td></tr><tr><td>PANTHER</td><td>PTHR23155</td><td></td></tr><tr><td>PANTHER</td><td>PTHR23155:SF643</td><td></td></tr><tr><td>SUPERFAMILY</td><td>SSF52058</td><td></td></tr…
OE9A102910	70.4461	2.12735	0.957524	2.22172	0.0263025	0.0935216	ID=OE9A102910T1;Parent=OE9A102910;Name=OE9A102910T1;product=OE9A102910P1;Description=ethylene-responsive transcription factor 1A-like;Ontology_term=GO:0003677%2C GO:0003700%2C GO:0005667%2C GO:0006355%2C GO:0045449
OE9A086074	8.31594	2.12659	0.86827	2.44923	0.0143161	0.0583416	ID=OE9A086074T1;Parent=OE9A086074;Name=OE9A086074T1;product=OE9A086074P1
OE9A039747	30.411	2.1246	0.36235	5.86341	4.53467e-09	1.03522e-07	ID=OE9A039747T1;Parent=OE9A039747;Name=OE9A039747T1;product=OE9A039747P1
OE9A037497	282.192	2.12219	0.173436	12.2362	1.99256e-34	6.58443e-32	ID=OE9A037497T1;Parent=OE9A037497;Name=OE9A037497T1;product=OE9A037497P1;Description=Anaphase-promoting complex (APC), subunit 11;Ontology_term=GO:0000166%2C GO:0005515%2C GO:0008270
OE9A042768	49.3929	2.12203	0.525006	4.04191	5.30174e-05	0.000525129	ID=OE9A042768T1;Parent=OE9A042768;Name=OE9A042768T1;product=OE9A042768P1
OE9A062012	802.712	2.119	0.162169	13.0667	5.10649e-39	2.49991e-36	ID=OE9A062012T1;Parent=OE9A062012;Name=OE9A062012T1;product=OE9A062012P1;md5=9e114dedafe3b72719c6ba07cf5d4c08;INTERPRO=<table><tr><th>DB</th><th>ID</th><th>Description</th></tr><tr><td>Gene3D</td><td>G3DSA:1.10.510.10</td><td></td></tr><tr><td>Gene3D</td><td>G3DSA:2.60.120.200</td><td></td></tr><tr><td>Gene3D</td><td>G3DSA:3.30.200.20</td><td></td></tr><tr><td>PANTHER</td><td>PTHR27002</td><td></…
OE9A078452	9.74396	2.1163	0.826981	2.55907	0.0104952	0.04589	ID=OE9A078452T2;Parent=OE9A078452;Name=OE9A078452T2;product=OE9A078452P2;Description=CHLOROPLAST IMPORT APPARATUS 2-like;Ontology_term=GO:0005515
OE9A015427	98.1717	2.11607	0.364289	5.80877	6.29346e-09	1.40163e-07	ID=OE9A015427T1;Parent=OE9A015427;Name=OE9A015427T1;product=OE9A015427P1;Description=NDR1 HIN1 1;Ontology_term=GO:0016021
OE9A106169	117.276	2.11598	0.852675	2.48158	0.01308	0.0543515	ID=OE9A106169T1;Parent=OE9A106169;Name=OE9A106169T1;product=OE9A106169P1;Description=vetispiradiene synthase 2-like;Ontology_term=GO:0000287%2C GO:0008152%2C GO:0010333
OE9A038140	1170.17	2.11563	0.245346	8.62305	6.5194e-18	5.14468e-16	ID=OE9A038140T1;Parent=OE9A038140;Name=OE9A038140T1;product=OE9A038140P1
OE9A057723	7.34238	2.11283	0.885292	2.3866	0.0170052	0.0668873	ID=OE9A057723T1;Parent=OE9A057723;Name=OE9A057723T1;product=OE9A057723P1;Description=Glutathione S-transferase;Ontology_term=GO:0005515
OE9A047396	20.7942	2.11255	0.786551	2.68584	0.00723473	0.0341958	ID=OE9A047396T1;Parent=OE9A047396;Name=OE9A047396T1;product=OE9A047396P1;Description=receptor-like serine threonine- kinase At2g45590;Ontology_term=GO:0004674%2C GO:0005524%2C GO:0005886%2C GO:0006468%2C GO:0009069%2C GO:0016021
OE9A035912	7.60669	2.11232	0.682985	3.09277	0.00198296	0.0119357	ID=OE9A035912T1;Parent=OE9A035912;Name=OE9A035912T1;product=OE9A035912P1;Description=ankyrin repeat-containing BDA1-like;Ontology_term=GO:0005515%2C GO:0016020
OE9A052330	33.1717	2.11121	0.466174	4.5288	5.93205e-06	7.51772e-05	ID=OE9A052330T1;Parent=OE9A052330;Name=OE9A052330T1;product=OE9A052330P1;Description=NSP-INTERACTING KINASE 1-like;Ontology_term=GO:0004674%2C GO:0005524%2C GO:0006468%2C GO:0009069%2C GO:0016021
OE9A015493	156.041	2.11055	0.382382	5.51947	3.40015e-08	6.75837e-07	ID=OE9A015493T1;Parent=OE9A015493;Name=OE9A015493T1;product=OE9A015493P1;Description=secoisolariciresinol dehydrogenase-like;Ontology_term=GO:0016491
OE9A001088	112.875	2.11025	0.282304	7.47509	7.71505e-14	3.6809e-12	ID=OE9A001088T1;Parent=OE9A001088;Name=OE9A001088T1;product=OE9A001088P1;Description=ACT domain-containing ACR10;Ontology_term=GO:0008152%2C GO:0016597
OE9A081507	9.52315	2.10704	0.894284	2.35612	0.0184671	0.0713633	ID=OE9A081507T1;Parent=OE9A081507;Name=OE9A081507T1;product=OE9A081507P1;Description=E3 ubiquitin- ligase PUB24-like;Ontology_term=GO:0004842%2C GO:0005488%2C GO:0016567
OE9A020193	180.29	2.10447	0.418324	5.03071	4.88678e-07	7.80968e-06	ID=OE9A020193T2;Parent=OE9A020193;Name=OE9A020193T2;product=OE9A020193P2;Description=probable sulfate transporter;Ontology_term=GO:0005887%2C GO:0008271%2C GO:1902358
OE9A014487	5.1934	2.10371	0.756438	2.78108	0.00541792	0.0270446	ID=OE9A014487T1;Parent=OE9A014487;Name=OE9A014487T1;product=OE9A014487P1
OE9A081147	59.5653	2.10345	0.853066	2.46575	0.0136727	0.0563535	ID=OE9A081147T1;Parent=OE9A081147;Name=OE9A081147T1;product=OE9A081147P1;Description=receptor kinase 1;Ontology_term=GO:0004674%2C GO:0005515%2C GO:0005524%2C GO:0005576%2C GO:0005886%2C GO:0006468%2C GO:0006508%2C GO:0009069%2C GO:0016021%2C GO:0048544
OE9A012374	8.70914	2.10148	0.937917	2.24058	0.0250533	0.0901541	ID=OE9A012374T1;Parent=OE9A012374;Name=OE9A012374T1;product=OE9A012374P1;Description=Cytochrome b6-f complex subunit 7;Ontology_term=GO:0009512%2C GO:0016021
OE9A036125	9.91376	2.09563	0.875299	2.39418	0.0166574	0.0657947	ID=OE9A036125T1;Parent=OE9A036125;Name=OE9A036125T1;product=OE9A036125P1;Description=ethylene-responsive transcription factor TINY-like;Ontology_term=GO:0003677%2C GO:0003700%2C GO:0005667%2C GO:0006355%2C GO:0045449
OE9A056039	554.834	2.09497	0.154668	13.545	8.48709e-42	5.34201e-39	ID=OE9A056039T2;Parent=OE9A056039;Name=OE9A056039T2;product=OE9A056039P2;Description=uncharacterized protein LOC105170041;Ontology_term=GO:0016021
OE9A017936	7.61501	2.09323	0.776158	2.69691	0.00699864	0.0333302	ID=OE9A017936T1;Parent=OE9A017936;Name=OE9A017936T1;product=OE9A017936P1;Description=glucan endo-1,3-beta-glucosidase 4-like;Ontology_term=GO:0004553%2C GO:0004673%2C GO:0005975%2C GO:0009365%2C GO:0018106%2C GO:0030247%2C GO:0046658
OE9A014259	8.1318	2.09299	0.85779	2.43998	0.0146882	0.0595364	ID=OE9A014259T1;Parent=OE9A014259;Name=OE9A014259T1;product=OE9A014259P1;Description=S-adenosylmethionine decarboxylase proenzyme-like;Ontology_term=GO:0004014%2C GO:0005829%2C GO:0006525%2C GO:0006557%2C GO:0006560%2C GO:0006597%2C GO:0008295
OE9A076971	29.1622	2.09243	0.406829	5.14327	2.70002e-07	4.51888e-06	ID=OE9A076971T4;Parent=OE9A076971;Name=OE9A076971T4;product=OE9A076971P3;Description=transcription factor bHLH48-like;Ontology_term=GO:0046983
OE9A004935	5.49644	2.0908	0.862007	2.4255	0.0152875	0.0615222	ID=OE9A004935T1;Parent=OE9A004935;Name=OE9A004935T1;product=OE9A004935P1;Description=UDP-galactose UDP-glucose transporter 2-like;Ontology_term=GO:0008643%2C GO:0030173%2C GO:0030176%2C GO:0046964%2C GO:1902559
OE9A105198	3.67485	2.08978	0.921968	2.26665	0.0234116	0.0856265	ID=OE9A105198T1;Parent=OE9A105198;Name=OE9A105198T1;product=OE9A105198P1
OE9A044056	235.158	2.08975	0.352894	5.92174	3.18553e-09	7.47228e-08	ID=OE9A044056T3;Parent=OE9A044056;Name=OE9A044056T3;product=OE9A044056P3;Description=G-type lectin S-receptor-like serine threonine- kinase At1g11300;Ontology_term=GO:0004674%2C GO:0005515%2C GO:0005524%2C GO:0006468%2C GO:0009069%2C GO:0016021%2C GO:0048544
OE9A034558	73.7869	2.0896	0.511506	4.08519	4.40415e-05	0.000444891	ID=OE9A034558T1;Parent=OE9A034558;Name=OE9A034558T1;product=OE9A034558P1;Description=heavy metal-associated isoprenylated plant 3-like isoform X1;Ontology_term=GO:0030001%2C GO:0046872
OE9A020412	70.8272	2.08919	0.430184	4.8565	1.19476e-06	1.76451e-05	ID=OE9A020412T1;Parent=OE9A020412;Name=OE9A020412T1;product=OE9A020412P1;Description=NSP-INTERACTING KINASE 1-like;Ontology_term=GO:0004674%2C GO:0005515%2C GO:0005524%2C GO:0006468%2C GO:0009069%2C GO:0016021
OE9A118615	131.474	2.08837	0.335572	6.22331	4.86777e-10	1.33076e-08	ID=OE9A118615T1;Parent=OE9A118615;Name=OE9A118615T1;product=OE9A118615P1;Description=probable metal-nicotianamine transporter YSL7;Ontology_term=GO:0016021%2C GO:0055085
OE9A114708	72.3139	2.08617	0.453645	4.59868	4.25168e-06	5.53682e-05	ID=OE9A114708T1;Parent=OE9A114708;Name=OE9A114708T1;product=OE9A114708P1;Description=G-type lectin S-receptor-like serine threonine- kinase At4g27290 isoform X2;Ontology_term=GO:0004672%2C GO:0005524%2C GO:0006468%2C GO:0016020%2C GO:0048544
OE9A046718	3.4812	2.08545	0.813279	2.56425	0.0103399	0.0453386	ID=OE9A046718T1;Parent=OE9A046718;Name=OE9A046718T1;product=OE9A046718P1;Description=zinc finger CONSTANS-LIKE 9-like;Ontology_term=GO:0005515%2C GO:0005622%2C GO:0008270
OE9A041303	381.389	2.08539	0.135079	15.4383	9.04394e-54	1.08675e-50	ID=OE9A041303T1;Parent=OE9A041303;Name=OE9A041303T1;product=OE9A041303P1;Description=G-box-binding factor 4-like;Ontology_term=GO:0003700%2C GO:0005667%2C GO:0006355%2C GO:0043565%2C GO:0045449
OE9A053913	48.3436	2.08511	0.470527	4.43145	9.36028e-06	0.00011299	ID=OE9A053913T1;Parent=OE9A053913;Name=OE9A053913T1;product=OE9A053913P1;Description=vinorine synthase-like;Ontology_term=GO:0016747
OE9A067487	1428.54	2.08361	0.159274	13.0819	4.17864e-39	2.08428e-36	ID=OE9A067487T1;Parent=OE9A067487;Name=OE9A067487T1;product=OE9A067487P1;Description=heme-binding At3g10130, chloroplastic;Ontology_term=GO:0009535%2C GO:0010287
OE9A101949	8.36135	2.08347	0.749188	2.78097	0.00541959	0.0270478	ID=OE9A101949T1;Parent=OE9A101949;Name=OE9A101949T1;product=OE9A101949P1;Description=NSP-INTERACTING KINASE 1-like isoform X1;Ontology_term=GO:0004674%2C GO:0005524%2C GO:0006468%2C GO:0009069%2C GO:0016021
OE9A056967	3650.43	2.08295	0.175762	11.8509	2.12815e-32	6.18238e-30	ID=OE9A056967T1;Parent=OE9A056967;Name=OE9A056967T1;product=OE9A056967P1;Description=thiamine thiazole synthase 2, chloroplastic;Ontology_term=GO:0005829%2C GO:0006950%2C GO:0009228%2C GO:0009570%2C GO:0016491%2C GO:0046872%2C GO:0052837%2C GO:0055114
OE9A107280	187.967	2.08051	0.432936	4.80559	1.54298e-06	2.22655e-05	ID=OE9A107280T2;Parent=OE9A107280;Name=OE9A107280T2;product=OE9A107280P2;Description=WD repeat-containing 44-like isoform X1;Ontology_term=GO:0005515
OE9A048292	579.455	2.07994	0.52963	3.92716	8.5955e-05	0.000810959	ID=OE9A048292T1;Parent=OE9A048292;Name=OE9A048292T1;product=OE9A048292P1;Description=abscisic acid receptor PYL4-like;Ontology_term=GO:0004864%2C GO:0004872%2C GO:0005634%2C GO:0005737%2C GO:0009738%2C GO:0010427%2C GO:0043086%2C GO:0080163
OE9A051140	4.91596	2.07957	0.846267	2.45735	0.0139967	0.0573322	ID=OE9A051140T1;Parent=OE9A051140;Name=OE9A051140T1;product=OE9A051140P1;Description=phosphatidylinositol 3,4,5-trisphosphate 3-phosphatase and -tyrosine-phosphatase PTEN2A;Ontology_term=GO:0004725%2C GO:0005515%2C GO:0006570%2C GO:0035335
OE9A033687	301.947	2.07954	0.178099	11.6763	1.68403e-31	4.54276e-29	ID=OE9A033687T1;Parent=OE9A033687;Name=OE9A033687T1;product=OE9A033687P1;Description=mitogen-activated kinase 9-like;Ontology_term=GO:0000165%2C GO:0004707%2C GO:0005524%2C GO:0005622%2C GO:0007178%2C GO:0009069
OE9A014265	741.424	2.07946	0.189561	10.9699	5.33482e-28	1.14906e-25	ID=OE9A014265T1;Parent=OE9A014265;Name=OE9A014265T1;product=OE9A014265P1;Description=CHLOROPLAST IMPORT APPARATUS 2-like;Ontology_term=GO:0005515
OE9A110492	35.5639	2.07903	0.546809	3.80211	0.000143468	0.00126804	ID=OE9A110492T1;Parent=OE9A110492;Name=OE9A110492T1;product=OE9A110492P1
OE9A015450	5.95015	2.07605	0.735572	2.82236	0.00476716	0.0243432	ID=OE9A015450T1;Parent=OE9A015450;Name=OE9A015450T1;product=OE9A015450P1;Description=kDa class I heat shock -like;Ontology_term=GO:0005737
OE9A034494	17.4475	2.07514	0.538169	3.85592	0.000115295	0.00104704	ID=OE9A034494T1;Parent=OE9A034494;Name=OE9A034494T1;product=OE9A034494P1
OE9A071689	4.9807	2.0737	0.797089	2.60159	0.0092792	0.0417469	ID=OE9A071689T1;Parent=OE9A071689;Name=OE9A071689T1;product=OE9A071689P1;Description=26S protease regulatory subunit 7 homolog A-like;Ontology_term=GO:0005524%2C GO:0008540%2C GO:0017025%2C GO:0030433%2C GO:0031595%2C GO:0031597%2C GO:0036402%2C GO:0045899%2C GO:1901800
OE9A112864	38.7294	2.06941	0.372823	5.55066	2.84599e-08	5.7084e-07	ID=OE9A112864T1;Parent=OE9A112864;Name=OE9A112864T1;product=OE9A112864P1
OE9A038414	201.115	2.06882	0.199322	10.3793	3.08148e-25	5.15583e-23	ID=OE9A038414T1;Parent=OE9A038414;Name=OE9A038414T1;product=OE9A038414P1;md5=5b0b40d71058bcc912ccd8c4825830ec;INTERPRO=<table><tr><th>DB</th><th>ID</th><th>Description</th></tr><tr><td>Gene3D</td><td>G3DSA:1.10.510.10</td><td></td></tr><tr><td>Gene3D</td><td>G3DSA:2.60.120.200</td><td></td></tr><tr><td>Gene3D</td><td>G3DSA:3.30.200.20</td><td></td></tr><tr><td>PANTHER</td><td>PTHR27002</td><td></…
OE9A112762	745.611	2.06219	0.189697	10.871	1.58508e-27	3.17449e-25	ID=OE9A112762T1;Parent=OE9A112762;Name=OE9A112762T1;product=OE9A112762P1;Description=PIN-LIKES 6;Ontology_term=GO:0016021%2C GO:0055085
OE9A063911	422.688	2.06173	0.276331	7.46107	8.58196e-14	4.03688e-12	ID=OE9A063911T1;Parent=OE9A063911;Name=OE9A063911T1;product=OE9A063911P1;Description=nitrate reductase;Ontology_term=GO:0006809%2C GO:0009325%2C GO:0009703%2C GO:0020037%2C GO:0030151%2C GO:0042128%2C GO:0043546%2C GO:0050464%2C GO:0055114
OE9A049279	5.21654	2.06166	0.817285	2.52257	0.0116499	0.0498184	ID=OE9A049279T1;Parent=OE9A049279;Name=OE9A049279T1;product=OE9A049279P1;Description=tobamovirus multiplication 1;Ontology_term=GO:0016021
OE9A111646	151.714	2.06007	0.221529	9.29935	1.41311e-20	1.55008e-18	ID=OE9A111646T1;Parent=OE9A111646;Name=OE9A111646T1;product=OE9A111646P1;Description=50S ribosomal L12, chloroplastic-like;Ontology_term=GO:0003735%2C GO:0005840%2C GO:0006412%2C GO:0009507%2C GO:0042254
OE9A093988	841.585	2.0581	0.903572	2.27773	0.0227425	0.0837354	ID=OE9A093988T1;Parent=OE9A093988;Name=OE9A093988T1;product=OE9A093988P1;Description=beta-glucosidase-like;Ontology_term=GO:0004553%2C GO:0005975
OE9A040048	1102.6	2.0522	0.214181	9.58162	9.55371e-22	1.14281e-19	ID=OE9A040048T1;Parent=OE9A040048;Name=OE9A040048T1;product=OE9A040048P1;Description=ATP sulfurylase 1, chloroplastic-like;Ontology_term=GO:0000103%2C GO:0004020%2C GO:0004781%2C GO:0005739%2C GO:0006144%2C GO:0009570%2C GO:0016310
OE9A018955	4.34475	2.04996	0.926258	2.21316	0.0268863	0.0951114	ID=OE9A018955T1;Parent=OE9A018955;Name=OE9A018955T1;product=OE9A018955P1;Description=eukaryotic translation initiation factor-like;Ontology_term=GO:0003723%2C GO:0005515
OE9A006125	81.309	2.04878	0.407464	5.02813	4.95278e-07	7.9065e-06	ID=OE9A006125T1;Parent=OE9A006125;Name=OE9A006125T1;product=OE9A006125P1;Description=lysosomal Pro-X carboxypeptidase;Ontology_term=GO:0004180%2C GO:0006508%2C GO:0008236
OE9A098399	40.8876	2.04764	0.754524	2.71382	0.00665123	0.0319594	ID=OE9A098399T1;Parent=OE9A098399;Name=OE9A098399T1;product=OE9A098399P1;Description=ethylene-responsive transcription factor 1A-like;Ontology_term=GO:0003677%2C GO:0003700%2C GO:0005667%2C GO:0006355%2C GO:0045449
OE9A076965	203.99	2.04558	0.425861	4.8034	1.55997e-06	2.24738e-05	ID=OE9A076965T1;Parent=OE9A076965;Name=OE9A076965T1;product=OE9A076965P1;Description=receptor 12 isoform X1;Ontology_term=GO:0005515
OE9A064410	4.39425	2.04458	0.915902	2.23232	0.025594	0.0916557	ID=OE9A064410T1;Parent=OE9A064410;Name=OE9A064410T1;product=OE9A064410P1;Description=synaptotagmin-2 isoform X2;Ontology_term=GO:0005515%2C GO:0005783%2C GO:0005794%2C GO:0008289%2C GO:0009306%2C GO:0016021
OE9A087536	2588.85	2.04322	0.258371	7.90806	2.61437e-15	1.48631e-13	ID=OE9A087536T1;Parent=OE9A087536;Name=OE9A087536T1;product=OE9A087536P1;Description=ACT domain-containing ACR10;Ontology_term=GO:0008152%2C GO:0016597
OE9A108156	8.80264	2.04315	0.728733	2.8037	0.00505203	0.0254682	ID=OE9A108156T1;Parent=OE9A108156;Name=OE9A108156T1;product=OE9A108156P1;Description=type I inositol polyphosphate 5-phosphatase 5;Ontology_term=GO:0016787%2C GO:0046856
OE9A018516	129.401	2.04092	0.265587	7.68456	1.53519e-14	7.91116e-13	ID=OE9A018516T1;Parent=OE9A018516;Name=OE9A018516T1;product=OE9A018516P1
OE9A110321	80.9784	2.04026	0.345238	5.90974	3.4265e-09	7.98088e-08	ID=OE9A110321T1;Parent=OE9A110321;Name=OE9A110321T1;product=OE9A110321P1
OE9A069208	186.984	2.0379	0.384929	5.29423	1.19518e-07	2.14937e-06	ID=OE9A069208T1;Parent=OE9A069208;Name=OE9A069208T1;product=OE9A069208P1;Description=high affinity nitrate transporter -like;Ontology_term=GO:0016021%2C GO:0055085
OE9A104208	12.8036	2.03684	0.636312	3.20102	0.00136944	0.00876997	ID=OE9A104208T1;Parent=OE9A104208;Name=OE9A104208T1;product=OE9A104208P1;Description=heat shock cognate 80;Ontology_term=GO:0005524%2C GO:0006457%2C GO:0006950%2C GO:0051082
OE9A000939	12.7653	2.03627	0.582565	3.49536	0.000473423	0.00353643	ID=OE9A000939T1;Parent=OE9A000939;Name=OE9A000939T1;product=OE9A000939P1
OE9A003036	151.984	2.03503	0.278035	7.31932	2.49229e-13	1.1092e-11	ID=OE9A003036T1;Parent=OE9A003036;Name=OE9A003036T1;product=OE9A003036P1;Description=alcohol dehydrogenase-like 4;Ontology_term=GO:0008270%2C GO:0016491%2C GO:0055114
OE9A072117	52.0703	2.03461	0.493234	4.12504	3.70671e-05	0.000383225	ID=OE9A072117T1;Parent=OE9A072117;Name=OE9A072117T1;product=OE9A072117P1;Description=probable carboxylesterase 120;Ontology_term=GO:0008152%2C GO:0016787
OE9A005507	8.05961	2.03338	0.663048	3.06671	0.00216429	0.0128515	ID=OE9A005507T1;Parent=OE9A005507;Name=OE9A005507T1;product=OE9A005507P1;Description=NUCLEAR FUSION DEFECTIVE 4-like;Ontology_term=GO:0016021
OE9A059474	199.225	2.03328	0.639745	3.17827	0.00148156	0.00936829	ID=OE9A059474T1;Parent=OE9A059474;Name=OE9A059474T1;product=OE9A059474P1
OE9A091328	13.1235	2.03305	0.846042	2.40301	0.0162605	0.0645664	ID=OE9A091328T1;Parent=OE9A091328;Name=OE9A091328T1;product=OE9A091328P1;Description=cell division control 2 homolog A-like;Ontology_term=GO:0004674%2C GO:0005524%2C GO:0006468%2C GO:0009069
OE9A075255	8.64808	2.03304	0.705316	2.88245	0.00394592	0.0210184	ID=OE9A075255T1;Parent=OE9A075255;Name=OE9A075255T1;product=OE9A075255P1;Description=probable receptor-like serine threonine- kinase At5g57670;Ontology_term=GO:0004674%2C GO:0005524%2C GO:0006468%2C GO:0006950%2C GO:0009069
OE9A121737	188.144	2.02665	0.428913	4.72509	2.30016e-06	3.18529e-05	ID=OE9A121737T1;Parent=OE9A121737;Name=OE9A121737T1;product=OE9A121737P1;Description=gibberellin 20 oxidase 1-like;Ontology_term=GO:0005506%2C GO:0016491%2C GO:0055114
OE9A103435	151.674	2.02012	0.746765	2.70516	0.00682715	0.0326429	ID=OE9A103435T1;Parent=OE9A103435;Name=OE9A103435T1;product=OE9A103435P1;Description=myb-related Myb4-like;Ontology_term=GO:0003677
OE9A032179	5.41948	2.01848	0.723282	2.79073	0.00525896	0.0263356	ID=OE9A032179T1;Parent=OE9A032179;Name=OE9A032179T1;product=OE9A032179P1;Description=dual specificity phosphatase DSP8;Ontology_term=GO:0004439%2C GO:0004725%2C GO:0006570%2C GO:0008138%2C GO:0035335
OE9A044600	49.5121	2.01666	0.373552	5.39861	6.71586e-08	1.26634e-06	ID=OE9A044600T1;Parent=OE9A044600;Name=OE9A044600T1;product=OE9A044600P1;Description=wall-associated receptor kinase 2-like;Ontology_term=GO:0005515%2C GO:0030247
OE9A063541	551.628	2.01598	0.506197	3.9826	6.81646e-05	0.000658626	ID=OE9A063541T1;Parent=OE9A063541;Name=OE9A063541T1;product=OE9A063541P1
OE9A106259	87.1388	2.01511	0.242382	8.31381	9.26775e-17	6.26604e-15	ID=OE9A106259T1;Parent=OE9A106259;Name=OE9A106259T1;product=OE9A106259P1;Description=KH domain-containing At3g08620-like isoform X1;Ontology_term=GO:0003723
OE9A046221	42.2756	2.01396	0.324541	6.20558	5.44972e-10	1.47009e-08	ID=OE9A046221T1;Parent=OE9A046221;Name=OE9A046221T1;product=OE9A046221P1;Description=ethylene-responsive transcription factor ERF061;Ontology_term=GO:0003677%2C GO:0003700%2C GO:0005667%2C GO:0006355%2C GO:0045449
OE9A110592	452.786	2.01248	0.162215	12.4063	2.4164e-35	8.63244e-33	ID=OE9A110592T1;Parent=OE9A110592;Name=OE9A110592T1;product=OE9A110592P1;Description=beta-1,3-galactosyltransferase GALT1;Ontology_term=GO:0005794%2C GO:0006486%2C GO:0010488%2C GO:0010493%2C GO:0016021%2C GO:0030246
OE9A119365	10.0006	2.00934	0.748966	2.68281	0.00730061	0.0344395	ID=OE9A119365T1;Parent=OE9A119365;Name=OE9A119365T1;product=OE9A119365P1
OE9A066301	385.6	2.00594	0.684548	2.93031	0.00338629	0.0185303	ID=OE9A066301T1;Parent=OE9A066301;Name=OE9A066301T1;product=OE9A066301P1;Description=premnaspirodiene oxygenase-like;Ontology_term=GO:0004497%2C GO:0005506%2C GO:0016021%2C GO:0016705%2C GO:0020037%2C GO:0055114
OE9A071942	7995.15	2.00286	0.11857	16.8918	5.17373e-64	1.5197e-60	ID=OE9A071942T1;Parent=OE9A071942;Name=OE9A071942T1;product=OE9A071942P1;Description=ATP-dependent Clp protease ATP-binding subunit homolog CD4B, chloroplastic-like;Ontology_term=GO:0005515%2C GO:0005524%2C GO:0019538
OE9A039863	6.11091	2.00184	0.792946	2.52456	0.0115844	0.0496346	ID=OE9A039863T1;Parent=OE9A039863;Name=OE9A039863T1;product=OE9A039863P1;Description=peptidyl-prolyl cis-trans isomerase FKBP43-like;Ontology_term=GO:0000413%2C GO:0003755%2C GO:0006457
OE9A112346	737.862	2.00019	0.173545	11.5255	9.81336e-31	2.56857e-28	ID=OE9A112346T1;Parent=OE9A112346;Name=OE9A112346T1;product=OE9A112346P1;Description=Anaphase-promoting complex (APC), subunit 11;Ontology_term=GO:0000166%2C GO:0005515%2C GO:0008270

## Sheet: ShinyGO UP FC>2
	Enrichment FDR	nGenes	Pathway Genes	Fold Enrichment	Pathways (click for details)	Genes
	0.00012	24	632	3.4	GO:0008152 Metabolic process	OE9A001088 OE9A001734 OE9A002730 OE9A008731 OE9A014613 OE9A021028 OE9A033614 OE9A035916 OE9A039171 OE9A042037 OE9A043307 OE9A048337 OE9A048767 OE9A050140 OE9A050526 OE9A065574 OE9A066946 OE9A072117 OE9A077229 OE9A084435 OE9A087536 OE9A101007 OE9A106169 OE9A110382
	0.00032	10	123	7.4	GO:0010333 Terpene synthase activity	OE9A021028 OE9A039171 OE9A042037 OE9A043307 OE9A050526 OE9A065231 OE9A077229 OE9A084435 OE9A101007 OE9A106169
	0.00034	23	664	3.1	GO:0005506 Iron ion binding	OE9A002628 OE9A004824 OE9A014370 OE9A025629 OE9A030969 OE9A033947 OE9A045303 OE9A047267 OE9A051613 OE9A063225 OE9A065742 OE9A066301 OE9A084374 OE9A089296 OE9A090761 OE9A092465 OE9A092818 OE9A095668 OE9A096610 OE9A103256 OE9A119429 OE9A120982 OE9A121737
	0.00055	57	2739	1.9	GO:0055114 Oxidation-reduction process	OE9A002628 OE9A002846 OE9A003036 OE9A004763 OE9A004824 OE9A010091 OE9A013958 OE9A014370 OE9A025629 OE9A029993 OE9A030382 OE9A030969 OE9A033947 OE9A038360 OE9A039829 OE9A045303 OE9A046262 OE9A047267 OE9A049120 OE9A049515 OE9A049789 OE9A051613 OE9A056967 OE9A058913 OE9A062170 OE9A063225 OE9A063911 OE9A065742 OE9A066301 OE9A071510 OE9A074071 OE9A076339 OE9A076547 OE9A078880 OE9A080568 OE9A084374 OE9…
	0.00067	12	217	5	GO:0006952 Defense response	OE9A031211 OE9A038120 OE9A040265 OE9A043019 OE9A044979 OE9A047084 OE9A051438 OE9A057882 OE9A062646 OE9A095245 OE9A096921 OE9A118859
	0.0017	22	722	2.8	GO:0020037 Heme binding	OE9A002846 OE9A004763 OE9A014370 OE9A025629 OE9A033947 OE9A038360 OE9A045303 OE9A051613 OE9A063911 OE9A065742 OE9A066301 OE9A074071 OE9A084374 OE9A088586 OE9A089296 OE9A090761 OE9A092465 OE9A095668 OE9A096610 OE9A103256 OE9A119429 OE9A120982
	0.0017	3	6	45.4	GO:0042558 Pteridine-containing compound metabolic process	OE9A039829 OE9A049515 OE9A058913
	0.0017	13	291	4.1	GO:0004497 Monooxygenase activity	OE9A014370 OE9A033947 OE9A045303 OE9A051613 OE9A065742 OE9A066301 OE9A084374 OE9A089296 OE9A090761 OE9A095668 OE9A096610 OE9A103256 OE9A120982
	0.0029	13	310	3.8	GO:0000287 Magnesium ion binding	OE9A006455 OE9A021028 OE9A039171 OE9A042037 OE9A043307 OE9A050526 OE9A065231 OE9A074395 OE9A077229 OE9A084435 OE9A101007 OE9A106169 OE9A106798
	0.003	15	406	3.4	GO:0016705 Oxidoreductase activity, acting on paired donors, with incorporation or reduction of mole	OE9A025629 OE9A033947 OE9A045303 OE9A051613 OE9A065742 OE9A066301 OE9A084374 OE9A089296 OE9A090761 OE9A092465 OE9A095668 OE9A096610 OE9A103256 OE9A119429 OE9A120982
	0.0038	7	94	6.8	GO:0009607 Response to biotic stimulus	OE9A038120 OE9A044979 OE9A047084 OE9A051438 OE9A095245 OE9A096921 OE9A118859
	0.0038	18	571	2.9	GO:0016491 Oxidoreductase activity	OE9A003036 OE9A004824 OE9A009378 OE9A013958 OE9A015493 OE9A037097 OE9A048337 OE9A049789 OE9A056967 OE9A057034 OE9A059014 OE9A063225 OE9A078255 OE9A078880 OE9A085084 OE9A106316 OE9A114407 OE9A121737
	0.0041	3	9	30.3	GO:0035671 Enone reductase activity	OE9A039829 OE9A049515 OE9A058913
	0.0041	3	9	30.3	GO:0035798 2-alkenal reductase (NADP+) activity	OE9A039829 OE9A049515 OE9A058913
	0.0062	16	501	2.9	GO:0005975 Carbohydrate metabolic process	OE9A003034 OE9A017936 OE9A051211 OE9A051307 OE9A057780 OE9A057882 OE9A060505 OE9A061624 OE9A067989 OE9A070518 OE9A074219 OE9A083386 OE9A093988 OE9A097997 OE9A106246 OE9A117672
	0.0092	3	12	22.7	GO:0010167 Response to nitrate	OE9A023329 OE9A050819 OE9A075288
	0.011	3	13	20.9	GO:0015706 Nitrate transport	OE9A023329 OE9A050819 OE9A075288
	0.011	2	3	60.5	GO:0004851 Uroporphyrin-III C-methyltransferase activity	OE9A029993 OE9A080568
	0.012	4	33	11	GO:0010427 Abscisic acid binding	OE9A031523 OE9A035730 OE9A048292 OE9A068997
	0.012	4	33	11	GO:0004872 Receptor activity	OE9A031523 OE9A035730 OE9A048292 OE9A068997

## Sheet: DOWN FC<-2
List of Differential Expressed Genes (DEGs) in T1 Sankari©_vs_T0_Sankari©
DEGs with fold change (FC) <-2 of olives treated with Sankari© at T1 compared with the same plants at T0.
Gene ID	baseMean	log2FoldChange	lfcSE	stat	pvalue	padj	Description
OE9A029983	10.5951	-6.52774	1.03818	-6.28767	3.22263e-10	9.08245e-09	ID=OE9A029983T1;Parent=OE9A029983;Name=OE9A029983T1;product=OE9A029983P1
OE9A073696	10.4699	-6.38975	1.06457	-6.00219	1.94672e-09	4.76515e-08	ID=OE9A073696T1;Parent=OE9A073696;Name=OE9A073696T1;product=OE9A073696P1
OE9A009930	5.62845	-6.14038	1.3428	-4.57281	4.81236e-06	6.20583e-05	ID=OE9A009930T1;Parent=OE9A009930;Name=OE9A009930T1;product=OE9A009930P1;Description=dehydration-responsive element-binding 1E-like;Ontology_term=GO:0003677%2C GO:0003700%2C GO:0005634%2C GO:0005667%2C GO:0006355%2C GO:0045449
OE9A121592	1433.49	-6.11916	0.220043	-27.8089	3.38182e-170	4.47009e-166	ID=OE9A121592T1;Parent=OE9A121592;Name=OE9A121592T1;product=OE9A121592P1;Description=zinc finger CONSTANS-LIKE 2-like;Ontology_term=GO:0005515%2C GO:0005634%2C GO:0008270%2C GO:0009416%2C GO:0009909
OE9A090940	13.9895	-6.07396	1.10803	-5.48179	4.21036e-08	8.23872e-07	ID=OE9A090940T1;Parent=OE9A090940;Name=OE9A090940T1;product=OE9A090940P1;Description=calcium-binding CML38-like;Ontology_term=GO:0005509
OE9A031554	1432.9	-6.03396	0.210197	-28.7062	3.19567e-181	8.44808e-177	ID=OE9A031554T1;Parent=OE9A031554;Name=OE9A031554T1;product=OE9A031554P1;Description=B-box zinc finger 32-like;Ontology_term=GO:0005622%2C GO:0008270
OE9A079175	5.85499	-5.78102	1.14757	-5.03763	4.71324e-07	7.56522e-06	ID=OE9A079175T1;Parent=OE9A079175;Name=OE9A079175T1;product=OE9A079175P1;Description=probable inactive patatin 9;Ontology_term=GO:0016042%2C GO:0016787
OE9A045635	708.475	-5.74959	0.288541	-19.9264	2.40133e-88	1.58704e-84	ID=OE9A045635T1;Parent=OE9A045635;Name=OE9A045635T1;product=OE9A045635P1;Description=b-box domain 30;Ontology_term=GO:0005622%2C GO:0008270
OE9A084227	454.408	-5.64533	0.365071	-15.4637	6.10267e-54	7.68238e-51	ID=OE9A084227T1;Parent=OE9A084227;Name=OE9A084227T1;product=OE9A084227P1;Description=haloacid dehalogenase-like hydrolase domain-containing 3;Ontology_term=GO:0008152%2C GO:0016787
OE9A024278	7.94401	-5.63989	1.37877	-4.09052	4.30399e-05	0.000435773	ID=OE9A024278T1;Parent=OE9A024278;Name=OE9A024278T1;product=OE9A024278P1;Description=calcium-binding CML38;Ontology_term=GO:0005509
OE9A076025	50.9089	-5.56922	0.662514	-8.40619	4.23533e-17	2.9778e-15	ID=OE9A076025T1;Parent=OE9A076025;Name=OE9A076025T1;product=OE9A076025P1
OE9A005875	246.358	-5.53835	0.926304	-5.97898	2.2454e-09	5.42844e-08	ID=OE9A005875T1;Parent=OE9A005875;Name=OE9A005875T1;product=OE9A005875P1;Description=dehydration-responsive element-binding 1E-like;Ontology_term=GO:0003677%2C GO:0003700%2C GO:0005634%2C GO:0005667%2C GO:0006355%2C GO:0045449
OE9A111592	3.44702	-5.47842	1.4175	-3.86486	0.000111153	0.00101641	ID=OE9A111592T1;Parent=OE9A111592;Name=OE9A111592T1;product=OE9A111592P1
OE9A055755	27.5497	-5.38784	0.693435	-7.76979	7.8618e-15	4.22428e-13	ID=OE9A055755T1;Parent=OE9A055755;Name=OE9A055755T1;product=OE9A055755P1
OE9A093962	46.929	-5.32818	0.512158	-10.4034	2.39272e-25	4.10741e-23	ID=OE9A093962T1;Parent=OE9A093962;Name=OE9A093962T1;product=OE9A093962P1
OE9A019292	3.41843	-5.3189	1.25867	-4.22582	2.38069e-05	0.000259102	ID=OE9A019292T1;Parent=OE9A019292;Name=OE9A019292T1;product=OE9A019292P1
OE9A021502	6.75518	-5.2983	1.27231	-4.1643	3.12303e-05	0.000328533	ID=OE9A021502T1;Parent=OE9A021502;Name=OE9A021502T1;product=OE9A021502P1
OE9A000299	1409.69	-5.24901	0.767649	-6.83778	8.04294e-12	2.92466e-10	ID=OE9A000299T1;Parent=OE9A000299;Name=OE9A000299T1;product=OE9A000299P1;Description=dehydration-responsive element-binding 1A;Ontology_term=GO:0003677%2C GO:0003700%2C GO:0005634%2C GO:0005667%2C GO:0006355%2C GO:0045449
OE9A028341	420.883	-5.22237	0.562475	-9.28463	1.62275e-20	1.77269e-18	ID=OE9A028341T1;Parent=OE9A028341;Name=OE9A028341T1;product=OE9A028341P1;Description=C-repeat dehydration-responsive element-binding factor 4;Ontology_term=GO:0003677%2C GO:0003700%2C GO:0005634%2C GO:0005667%2C GO:0006355%2C GO:0045449
OE9A049680	1075.08	-5.20324	0.309382	-16.8182	1.79499e-63	4.31386e-60	ID=OE9A049680T1;Parent=OE9A049680;Name=OE9A049680T1;product=OE9A049680P1;Description=haloacid dehalogenase-like hydrolase domain-containing 3;Ontology_term=GO:0008152%2C GO:0016787
OE9A049928	5.64818	-5.16579	1.05539	-4.89465	9.84802e-07	1.47586e-05	ID=OE9A049928T1;Parent=OE9A049928;Name=OE9A049928T1;product=OE9A049928P1;Description=ABC transporter G family member 5;Ontology_term=GO:0005524%2C GO:0005886%2C GO:0016021%2C GO:0042626%2C GO:0055085
OE9A041022	494.045	-5.09526	0.6184	-8.23943	1.73034e-16	1.11903e-14	ID=OE9A041022T1;Parent=OE9A041022;Name=OE9A041022T1;product=OE9A041022P1;Description=xyloglucan endotransglycosylase hydrolase;Ontology_term=GO:0004553%2C GO:0005618%2C GO:0010411%2C GO:0016762%2C GO:0042546%2C GO:0048046%2C GO:0071555
OE9A047201	463.471	-5.01816	0.694012	-7.23065	4.807e-13	2.05961e-11	ID=OE9A047201T1;Parent=OE9A047201;Name=OE9A047201T1;product=OE9A047201P1
OE9A110715	262.587	-4.87909	0.562664	-8.67142	4.26761e-18	3.51459e-16	ID=OE9A110715T1;Parent=OE9A110715;Name=OE9A110715T1;product=OE9A110715P1
OE9A050337	2335.04	-4.87475	0.396123	-12.3062	8.39308e-35	2.84461e-32	ID=OE9A050337T1;Parent=OE9A050337;Name=OE9A050337T1;product=OE9A050337P1;Description=tonoplast dicarboxylate transporter;Ontology_term=GO:0005215%2C GO:0006814%2C GO:0016021%2C GO:0098656
OE9A094590	33.6172	-4.86987	0.651499	-7.47488	7.72772e-14	3.6809e-12	ID=OE9A094590T1;Parent=OE9A094590;Name=OE9A094590T1;product=OE9A094590P1;Description=dof zinc finger;Ontology_term=GO:0003677%2C GO:0006355
OE9A066651	4.05674	-4.8583	1.54496	-3.14461	0.00166311	0.0103059	ID=OE9A066651T1;Parent=OE9A066651;Name=OE9A066651T1;product=OE9A066651P1;Description=inorganic phosphate transporter 1-4-like;Ontology_term=GO:0005315%2C GO:0006817%2C GO:0016021%2C GO:0055085
OE9A058520	6.12607	-4.81652	1.21373	-3.96836	7.23691e-05	0.000695463	ID=OE9A058520T1;Parent=OE9A058520;Name=OE9A058520T1;product=OE9A058520P1;Description=probable carboxylesterase 8;Ontology_term=GO:0008152%2C GO:0016787
OE9A007593	77.5854	-4.78897	0.817936	-5.85495	4.7716e-09	1.08183e-07	ID=OE9A007593T1;Parent=OE9A007593;Name=OE9A007593T1;product=OE9A007593P1
OE9A002067	595.747	-4.71035	0.432994	-10.8786	1.45845e-27	2.96581e-25	ID=OE9A002067T1;Parent=OE9A002067;Name=OE9A002067T1;product=OE9A002067P1;Description=calcium-binding PBP1-like;Ontology_term=GO:0005509
OE9A040794	6.68588	-4.6857	1.04541	-4.48219	7.38826e-06	9.16977e-05	ID=OE9A040794T1;Parent=OE9A040794;Name=OE9A040794T1;product=OE9A040794P1;Description=probable galactinol--sucrose galactosyltransferase 6;Ontology_term=GO:0003824
OE9A069045	89.8292	-4.67794	0.51442	-9.09362	9.57913e-20	9.77737e-18	ID=OE9A069045T1;Parent=OE9A069045;Name=OE9A069045T1;product=OE9A069045P1;Description=uncharacterized protein LOC111386977;Ontology_term=GO:0016020
OE9A090863	1776.77	-4.62769	0.680208	-6.80334	1.02221e-11	3.65179e-10	ID=OE9A090863T1;Parent=OE9A090863;Name=OE9A090863T1;product=OE9A090863P1;Description=xyloglucan endotransglycosylase hydrolase;Ontology_term=GO:0004553%2C GO:0005618%2C GO:0010411%2C GO:0016762%2C GO:0042546%2C GO:0048046%2C GO:0071555
OE9A095768	3924.23	-4.60426	0.606543	-7.59099	3.17471e-14	1.58352e-12	ID=OE9A095768T1;Parent=OE9A095768;Name=OE9A095768T1;product=OE9A095768P1;Description=mitochondrial uncoupling 5-like;Ontology_term=GO:0003735%2C GO:0005840%2C GO:0006412%2C GO:0006839%2C GO:0016021%2C GO:0031966%2C GO:0042254%2C GO:0055085
OE9A051495	859.328	-4.54335	0.930392	-4.88326	1.04345e-06	1.55669e-05	ID=OE9A051495T1;Parent=OE9A051495;Name=OE9A051495T1;product=OE9A051495P1;Description=ethylene-responsive transcription factor ERF017-like;Ontology_term=GO:0003677%2C GO:0003700%2C GO:0005667%2C GO:0006355%2C GO:0045449
OE9A098499	1205.69	-4.52779	0.572523	-7.90848	2.60555e-15	1.48449e-13	ID=OE9A098499T1;Parent=OE9A098499;Name=OE9A098499T1;product=OE9A098499P1
OE9A049568	1581.88	-4.51873	0.371514	-12.163	4.89203e-34	1.53959e-31	ID=OE9A049568T1;Parent=OE9A049568;Name=OE9A049568T1;product=OE9A049568P1
OE9A042024	5.16436	-4.51871	1.1908	-3.79469	0.000147827	0.00130049	ID=OE9A042024T1;Parent=OE9A042024;Name=OE9A042024T1;product=OE9A042024P1;Description=endoglucanase 24-like;Ontology_term=GO:0005982%2C GO:0005985%2C GO:0008810%2C GO:0030245
OE9A099847	11.2582	-4.51705	0.891681	-5.06577	4.06754e-07	6.60501e-06	ID=OE9A099847T1;Parent=OE9A099847;Name=OE9A099847T1;product=OE9A099847P1
OE9A114342	536.528	-4.51694	0.445476	-10.1396	3.68681e-24	5.66653e-22	ID=OE9A114342T1;Parent=OE9A114342;Name=OE9A114342T1;product=OE9A114342P1;Description=calcium-binding PBP1-like;Ontology_term=GO:0005509
OE9A048804	2971	-4.5125	0.535837	-8.42142	3.71963e-17	2.63625e-15	ID=OE9A048804T1;Parent=OE9A048804;Name=OE9A048804T1;product=OE9A048804P1
OE9A100291	824.6	-4.49588	0.717596	-6.26519	3.72365e-10	1.03838e-08	ID=OE9A100291T1;Parent=OE9A100291;Name=OE9A100291T1;product=OE9A100291P1;Description=xyloglucan endotransglycosylase hydrolase;Ontology_term=GO:0004553%2C GO:0005618%2C GO:0010411%2C GO:0016762%2C GO:0042546%2C GO:0048046%2C GO:0071555
OE9A113203	880.048	-4.4629	0.349823	-12.7576	2.8278e-37	1.16806e-34	ID=OE9A113203T1;Parent=OE9A113203;Name=OE9A113203T1;product=OE9A113203P1
OE9A119252	4.48499	-4.4557	1.10247	-4.04155	5.30995e-05	0.000525745	ID=OE9A119252T1;Parent=OE9A119252;Name=OE9A119252T1;product=OE9A119252P1;Description=pentatricopeptide repeat-containing At5g21222-like;Ontology_term=GO:0005515
OE9A016847	1170.57	-4.45234	0.584439	-7.61815	2.57339e-14	1.30576e-12	ID=OE9A016847T1;Parent=OE9A016847;Name=OE9A016847T1;product=OE9A016847P1
OE9A027095	436.213	-4.41614	1.01095	-4.36831	1.25213e-05	0.000146336	ID=OE9A027095T1;Parent=OE9A027095;Name=OE9A027095T1;product=OE9A027095P1;Description=calcium-binding CML38-like;Ontology_term=GO:0005509
OE9A089085	44.3398	-4.41544	0.492407	-8.96704	3.04582e-19	2.89638e-17	ID=OE9A089085T1;Parent=OE9A089085;Name=OE9A089085T1;product=OE9A089085P1;Description=zinc finger ZAT5-like;Ontology_term=GO:0003676%2C GO:0046872
OE9A074891	977.337	-4.40765	0.409499	-10.7635	5.11721e-27	9.80279e-25	ID=OE9A074891T1;Parent=OE9A074891;Name=OE9A074891T1;product=OE9A074891P1;Description=CBL-interacting serine threonine- kinase 14-like;Ontology_term=GO:0004674%2C GO:0005524%2C GO:0006468%2C GO:0007165%2C GO:0009069
OE9A035977	115.254	-4.39639	0.498928	-8.81169	1.23277e-18	1.08632e-16	ID=OE9A035977T1;Parent=OE9A035977;Name=OE9A035977T1;product=OE9A035977P1
OE9A057953	40.2058	-4.37134	0.506319	-8.63357	5.94662e-18	4.72087e-16	ID=OE9A057953T1;Parent=OE9A057953;Name=OE9A057953T1;product=OE9A057953P1;Description=zinc finger ZAT5-like;Ontology_term=GO:0003676%2C GO:0046872
OE9A063822	879.644	-4.34841	0.407001	-10.684	1.20926e-26	2.28343e-24	ID=OE9A063822T1;Parent=OE9A063822;Name=OE9A063822T1;product=OE9A063822P1;Description=CBL-interacting serine threonine- kinase 14-like;Ontology_term=GO:0004674%2C GO:0005524%2C GO:0006468%2C GO:0007165%2C GO:0009069
OE9A013225	5.10768	-4.32141	1.21848	-3.54655	0.000390312	0.00300772	ID=OE9A013225T1;Parent=OE9A013225;Name=OE9A013225T1;product=OE9A013225P1;Description=mavicyanin-like;Ontology_term=GO:0006118%2C GO:0009055%2C GO:0046658
OE9A032361	258.434	-4.31531	0.64625	-6.67745	2.4313e-11	8.14766e-10	ID=OE9A032361T1;Parent=OE9A032361;Name=OE9A032361T1;product=OE9A032361P1;Description=probable xyloglucan endotransglucosylase hydrolase 23;Ontology_term=GO:0004553%2C GO:0005618%2C GO:0010411%2C GO:0016762%2C GO:0042546%2C GO:0048046%2C GO:0071555
OE9A076134	4.162	-4.31432	1.22261	-3.52879	0.000417467	0.0031832	ID=OE9A076134T1;Parent=OE9A076134;Name=OE9A076134T1;product=OE9A076134P1;Description=exocyst complex component EXO70A1-like;Ontology_term=GO:0000145%2C GO:0006887
OE9A018184	11.1902	-4.29286	1.0326	-4.15735	3.21958e-05	0.000337214	ID=OE9A018184T1;Parent=OE9A018184;Name=OE9A018184T1;product=OE9A018184P1;Description=polygalacturonase At1g48100-like;Ontology_term=GO:0004650%2C GO:0005576%2C GO:0005982%2C GO:0005985%2C GO:0016829%2C GO:0071555
OE9A023527	2278.55	-4.29285	0.550783	-7.79408	6.48771e-15	3.52899e-13	ID=OE9A023527T1;Parent=OE9A023527;Name=OE9A023527T1;product=OE9A023527P1
OE9A095034	1262.27	-4.2862	0.498644	-8.59571	8.27528e-18	6.43427e-16	ID=OE9A095034T1;Parent=OE9A095034;Name=OE9A095034T1;product=OE9A095034P1
OE9A009588	13.732	-4.26682	0.815278	-5.23357	1.66263e-07	2.89356e-06	ID=OE9A009588T1;Parent=OE9A009588;Name=OE9A009588T1;product=OE9A009588P1;Description=uncharacterized protein LOC105159086, partial;Ontology_term=GO:0016021
OE9A076184	30.5609	-4.25429	0.703004	-6.05158	1.4343e-09	3.62151e-08	ID=OE9A076184T1;Parent=OE9A076184;Name=OE9A076184T1;product=OE9A076184P1;Description=ethylene-responsive transcription factor ERF017-like;Ontology_term=GO:0003677%2C GO:0003700%2C GO:0005667%2C GO:0006355%2C GO:0045449
OE9A006362	2696.15	-4.2509	0.544893	-7.80135	6.12462e-15	3.33836e-13	ID=OE9A006362T1;Parent=OE9A006362;Name=OE9A006362T1;product=OE9A006362P1
OE9A108739	10.5779	-4.19571	1.76591	-2.37595	0.0175039	0.0684616	ID=OE9A108739T1;Parent=OE9A108739;Name=OE9A108739T1;product=OE9A108739P1
OE9A064506	648.064	-4.18913	0.511829	-8.18462	2.73174e-16	1.71128e-14	ID=OE9A064506T1;Parent=OE9A064506;Name=OE9A064506T1;product=OE9A064506P1;Description=COBRA 7;Ontology_term=GO:0010215%2C GO:0016021%2C GO:0016049%2C GO:0031225
OE9A002541	9717.09	-4.17629	0.781928	-5.34102	9.24259e-08	1.70388e-06	ID=OE9A002541T1;Parent=OE9A002541;Name=OE9A002541T1;product=OE9A002541P1
OE9A110076	614.013	-4.15054	0.394205	-10.5289	6.35844e-26	1.15925e-23	ID=OE9A110076T1;Parent=OE9A110076;Name=OE9A110076T1;product=OE9A110076P1
OE9A077320	3.90122	-4.14414	1.26657	-3.27195	0.00106808	0.00712662	ID=OE9A077320T1;Parent=OE9A077320;Name=OE9A077320T1;product=OE9A077320P1
OE9A058471	211.163	-4.13787	0.249132	-16.6091	5.98444e-62	1.0547e-58	ID=OE9A058471T1;Parent=OE9A058471;Name=OE9A058471T1;product=OE9A058471P1;Description=zinc finger CONSTANS-LIKE 4-like;Ontology_term=GO:0005622%2C GO:0008270
OE9A095641	7.68663	-4.10137	1.0898	-3.76341	0.000167612	0.00144804	ID=OE9A095641T1;Parent=OE9A095641;Name=OE9A095641T1;product=OE9A095641P1
OE9A052108	2640.9	-4.07733	0.621526	-6.56019	5.3741e-11	1.71375e-09	ID=OE9A052108T1;Parent=OE9A052108;Name=OE9A052108T1;product=OE9A052108P1
OE9A031635	3128.18	-4.07548	0.53255	-7.65276	1.96704e-14	1.00388e-12	ID=OE9A031635T1;Parent=OE9A031635;Name=OE9A031635T1;product=OE9A031635P1
OE9A098831	86.5804	-4.0704	0.464611	-8.76088	1.9373e-18	1.66823e-16	ID=OE9A098831T1;Parent=OE9A098831;Name=OE9A098831T1;product=OE9A098831P1;Description=ankyrin repeat-containing BDA1-like;Ontology_term=GO:0005515
OE9A074307	147.367	-4.06442	0.344331	-11.8038	3.72936e-32	1.04882e-29	ID=OE9A074307T1;Parent=OE9A074307;Name=OE9A074307T1;product=OE9A074307P1;Description=kinesin KIN-7O isoform X1;Ontology_term=GO:0003777%2C GO:0005524%2C GO:0005871%2C GO:0005874%2C GO:0007018%2C GO:0008017%2C GO:0016887%2C GO:0045298
OE9A012024	123.154	-4.05418	0.398178	-10.1818	2.39049e-24	3.71735e-22	ID=OE9A012024T1;Parent=OE9A012024;Name=OE9A012024T1;product=OE9A012024P1
OE9A071208	19.4077	-4.04979	1.03518	-3.91216	9.14748e-05	0.000855405	ID=OE9A071208T1;Parent=OE9A071208;Name=OE9A071208T1;product=OE9A071208P1;Description=pectinesterase-like;Ontology_term=GO:0005576%2C GO:0005618%2C GO:0005982%2C GO:0005985%2C GO:0016021%2C GO:0030599%2C GO:0042545%2C GO:0043086%2C GO:0045330%2C GO:0045490%2C GO:0046910
OE9A037154	11.2667	-4.04531	0.842912	-4.79921	1.59294e-06	2.29238e-05	ID=OE9A037154T1;Parent=OE9A037154;Name=OE9A037154T1;product=OE9A037154P1
OE9A054834	6.33703	-4.04278	1.06162	-3.80812	0.000140027	0.00124262	ID=OE9A054834T1;Parent=OE9A054834;Name=OE9A054834T1;product=OE9A054834P1;Description=CASP 5C1;Ontology_term=GO:0005886%2C GO:0016021
OE9A052015	8.31851	-3.97818	0.97076	-4.098	4.16732e-05	0.000424046	ID=OE9A052015T2;Parent=OE9A052015;Name=OE9A052015T2;product=OE9A052015P2;Description=REVEILLE 8;Ontology_term=GO:0003677%2C GO:0005634%2C GO:0006355
OE9A033630	1248.5	-3.97551	0.590458	-6.73292	1.66295e-11	5.73164e-10	ID=OE9A033630T1;Parent=OE9A033630;Name=OE9A033630T1;product=OE9A033630P1;Description=probable galacturonosyltransferase-like 9;Ontology_term=GO:0016757
OE9A069211	90.4156	-3.96632	0.620233	-6.3949	1.60656e-10	4.74007e-09	ID=OE9A069211T1;Parent=OE9A069211;Name=OE9A069211T1;product=OE9A069211P1;Description=basic leucine zipper 43-like;Ontology_term=GO:0003700%2C GO:0005667%2C GO:0006355%2C GO:0043565%2C GO:0045449
OE9A090698	6584.31	-3.92609	0.586063	-6.69909	2.09725e-11	7.0718e-10	ID=OE9A090698T1;Parent=OE9A090698;Name=OE9A090698T1;product=OE9A090698P1;Description=mitochondrial uncoupling 5-like;Ontology_term=GO:0003735%2C GO:0005840%2C GO:0006412%2C GO:0006839%2C GO:0016021%2C GO:0031966%2C GO:0042254
OE9A076786	331.658	-3.92092	0.939196	-4.17476	2.98306e-05	0.00031544	ID=OE9A076786T1;Parent=OE9A076786;Name=OE9A076786T1;product=OE9A076786P1
OE9A094681	1491.25	-3.89601	0.400916	-9.71777	2.53261e-22	3.21885e-20	ID=OE9A094681T1;Parent=OE9A094681;Name=OE9A094681T1;product=OE9A094681P1
OE9A002219	1294.36	-3.87121	0.899061	-4.30584	1.66353e-05	0.000188987	ID=OE9A002219T1;Parent=OE9A002219;Name=OE9A002219T1;product=OE9A002219P1;Description=ethylene-responsive transcription factor ERF017-like;Ontology_term=GO:0003677%2C GO:0003700%2C GO:0005667%2C GO:0006355%2C GO:0045449
OE9A008111	157.109	-3.87114	0.31237	-12.3928	2.85867e-35	1.00763e-32	ID=OE9A008111T1;Parent=OE9A008111;Name=OE9A008111T1;product=OE9A008111P1;Description=U-box domain-containing 9;Ontology_term=GO:0004842%2C GO:0005634%2C GO:0005737%2C GO:0016567
OE9A032317	5.9483	-3.8528	1.04926	-3.67192	0.000240739	0.00197829	ID=OE9A032317T1;Parent=OE9A032317;Name=OE9A032317T1;product=OE9A032317P1;Description=glycosyltransferase family 64 C3;Ontology_term=GO:0006024%2C GO:0015012%2C GO:0016021
OE9A051180	7.69457	-3.85132	1.35654	-2.83908	0.00452435	0.0233787	ID=OE9A051180T1;Parent=OE9A051180;Name=OE9A051180T1;product=OE9A051180P1
OE9A012500	98.7142	-3.82127	0.433774	-8.80936	1.25866e-18	1.10179e-16	ID=OE9A012500T1;Parent=OE9A012500;Name=OE9A012500T1;product=OE9A012500P1;Description=eukaryotic translation initiation factor 3 subunit D-like;Ontology_term=GO:0001731%2C GO:0003743%2C GO:0005840%2C GO:0005852%2C GO:0006446%2C GO:0016282%2C GO:0033290
OE9A034009	24.2379	-3.81824	1.70885	-2.2344	0.0254569	0.091276	ID=OE9A034009T1;Parent=OE9A034009;Name=OE9A034009T1;product=OE9A034009P1;Description=aquaporin TIP1-3-like;Ontology_term=GO:0005887%2C GO:0006833%2C GO:0009705%2C GO:0009992%2C GO:0015250%2C GO:0015254%2C GO:0015793%2C GO:0034220%2C GO:0042807
OE9A009168	62.6561	-3.81757	0.466738	-8.17925	2.85616e-16	1.78079e-14	ID=OE9A009168T1;Parent=OE9A009168;Name=OE9A009168T1;product=OE9A009168P1;Description=NAC domain-containing 94;Ontology_term=GO:0003677%2C GO:0006355
OE9A069420	9528.26	-3.7815	0.574995	-6.57659	4.81371e-11	1.55e-09	ID=OE9A069420T1;Parent=OE9A069420;Name=OE9A069420T1;product=OE9A069420P1;Description=zinc finger CCCH domain-containing 29-like;Ontology_term=GO:0005515%2C GO:0046872
OE9A075123	513.425	-3.77274	0.412404	-9.14816	5.79125e-20	6.07529e-18	ID=OE9A075123T1;Parent=OE9A075123;Name=OE9A075123T1;product=OE9A075123P1;Description=ethylene-responsive transcription factor 5-like;Ontology_term=GO:0003677%2C GO:0003700%2C GO:0005667%2C GO:0006355%2C GO:0045449
OE9A033158	339.23	-3.754	0.459235	-8.17448	2.97137e-16	1.84392e-14	ID=OE9A033158T1;Parent=OE9A033158;Name=OE9A033158T1;product=OE9A033158P1
OE9A121134	13.8897	-3.75358	0.76885	-4.88208	1.04975e-06	1.56521e-05	ID=OE9A121134T1;Parent=OE9A121134;Name=OE9A121134T1;product=OE9A121134P1
OE9A072466	1997.7	-3.7478	0.712364	-5.26107	1.43221e-07	2.53087e-06	ID=OE9A072466T1;Parent=OE9A072466;Name=OE9A072466T1;product=OE9A072466P1;Description=BON1-associated 2-like;Ontology_term=GO:0005515
OE9A074452	5.14109	-3.74178	1.0955	-3.41559	0.000636443	0.00455962	ID=OE9A074452T1;Parent=OE9A074452;Name=OE9A074452T1;product=OE9A074452P1;Description=RING-H2 finger ATL2-like;Ontology_term=GO:0005515%2C GO:0008270
OE9A042454	130.771	-3.73537	0.307503	-12.1474	5.91904e-34	1.84089e-31	ID=OE9A042454T1;Parent=OE9A042454;Name=OE9A042454T1;product=OE9A042454P1;Description=zinc finger ZAT5-like;Ontology_term=GO:0003676%2C GO:0046872
OE9A083656	65.9143	-3.7294	0.792774	-4.70424	2.54807e-06	3.48659e-05	ID=OE9A083656T1;Parent=OE9A083656;Name=OE9A083656T1;product=OE9A083656P1;Description=glucose-6-phosphate 1-epimerase;Ontology_term=GO:0005975%2C GO:0016853%2C GO:0030246
OE9A103646	4.12478	-3.7149	1.38873	-2.67504	0.00747205	0.0350792	ID=OE9A103646T1;Parent=OE9A103646;Name=OE9A103646T1;product=OE9A103646P1;Description=AT-hook motif nuclear-localized 16;Ontology_term=GO:0000785%2C GO:0005634%2C GO:0010208%2C GO:0010228%2C GO:0010529%2C GO:0031490%2C GO:0035067%2C GO:1900111
OE9A008644	16.8672	-3.69633	0.676994	-5.45992	4.76351e-08	9.19854e-07	ID=OE9A008644T1;Parent=OE9A008644;Name=OE9A008644T1;product=OE9A008644P1;Description=cysteine ase inhibitor B-like;Ontology_term=GO:0004869%2C GO:0010951
OE9A012091	4.15448	-3.68413	1.36243	-2.70409	0.00684916	0.0327244	ID=OE9A012091T1;Parent=OE9A012091;Name=OE9A012091T1;product=OE9A012091P1;Description=SNAP25 homologous SNAP30;Ontology_term=GO:0005515
OE9A075826	166.624	-3.67843	0.422918	-8.69772	3.38609e-18	2.8238e-16	ID=OE9A075826T1;Parent=OE9A075826;Name=OE9A075826T1;product=OE9A075826P1;Description=auxin-responsive SAUR36-like;Ontology_term=GO:0009733
OE9A102829	7.95619	-3.65686	0.930772	-3.92885	8.53548e-05	0.000805871	ID=OE9A102829T1;Parent=OE9A102829;Name=OE9A102829T1;product=OE9A102829P1;Description=FT-interacting 1-like;Ontology_term=GO:0005509%2C GO:0005515%2C GO:0005544%2C GO:0005886%2C GO:0016021
OE9A001039	948.513	-3.6563	0.537195	-6.80627	1.00159e-11	3.58781e-10	ID=OE9A001039T1;Parent=OE9A001039;Name=OE9A001039T1;product=OE9A001039P1;Description=O-fucosyltransferase 20-like;Ontology_term=GO:0005737%2C GO:0016021
OE9A037441	77.0943	-3.65357	0.521408	-7.00712	2.43272e-12	9.3476e-11	ID=OE9A037441T1;Parent=OE9A037441;Name=OE9A037441T1;product=OE9A037441P1
OE9A107173	4.55942	-3.63511	1.53847	-2.36281	0.0181368	0.0703336	ID=OE9A107173T1;Parent=OE9A107173;Name=OE9A107173T1;product=OE9A107173P1;Description=ankyrin repeat-containing At5g02620-like;Ontology_term=GO:0005515
OE9A022843	42.9036	-3.63102	0.453084	-8.01401	1.11031e-15	6.53726e-14	ID=OE9A022843T1;Parent=OE9A022843;Name=OE9A022843T1;product=OE9A022843P1;Description=salicylic acid-binding 2;Ontology_term=GO:0009862%2C GO:0016042%2C GO:0016298%2C GO:0080031
OE9A091577	54.2549	-3.62092	0.857961	-4.22038	2.43893e-05	0.000264569	ID=OE9A091577T1;Parent=OE9A091577;Name=OE9A091577T1;product=OE9A091577P1
OE9A109213	5.20835	-3.61477	0.934292	-3.86899	0.000109286	0.00100176	ID=OE9A109213T1;Parent=OE9A109213;Name=OE9A109213T1;product=OE9A109213P1
OE9A016870	1650.3	-3.60998	0.220279	-16.3882	2.32153e-60	3.40956e-57	ID=OE9A016870T1;Parent=OE9A016870;Name=OE9A016870T1;product=OE9A016870P1;Description=B-box zinc finger 32-like;Ontology_term=GO:0005622%2C GO:0008270
OE9A049175	4.35774	-3.60652	1.51021	-2.38809	0.0169363	0.0666559	ID=OE9A049175T1;Parent=OE9A049175;Name=OE9A049175T1;product=OE9A049175P1;Description=lysine histidine transporter-like 8;Ontology_term=GO:0003333%2C GO:0005886%2C GO:0015171%2C GO:0016021
OE9A004366	5.51138	-3.60648	1.24585	-2.8948	0.00379397	0.0203732	ID=OE9A004366T1;Parent=OE9A004366;Name=OE9A004366T1;product=OE9A004366P1
OE9A003992	1023.06	-3.58549	0.241645	-14.8378	8.34034e-50	7.11242e-47	ID=OE9A003992T1;Parent=OE9A003992;Name=OE9A003992T1;product=OE9A003992P1
OE9A087494	4.52935	-3.56729	1.25963	-2.83201	0.00462562	0.0237812	ID=OE9A087494T1;Parent=OE9A087494;Name=OE9A087494T1;product=OE9A087494P1;Description=zinc-finger homeodomain 5-like;Ontology_term=GO:0003677
OE9A081102	4.86684	-3.53353	1.3662	-2.5864	0.00969852	0.0431375	ID=OE9A081102T1;Parent=OE9A081102;Name=OE9A081102T1;product=OE9A081102P1;Description=leucoanthocyanidin dioxygenase;Ontology_term=GO:0009718%2C GO:0031418%2C GO:0046872%2C GO:0050589%2C GO:0055114
OE9A118456	3309.9	-3.52966	0.26316	-13.4126	5.10007e-41	2.86863e-38	ID=OE9A118456T1;Parent=OE9A118456;Name=OE9A118456T1;product=OE9A118456P1;Description=calcium-binding allergen Ole e 8-like;Ontology_term=GO:0005509
OE9A096223	70.2808	-3.51698	0.67105	-5.24101	1.59699e-07	2.80147e-06	ID=OE9A096223T1;Parent=OE9A096223;Name=OE9A096223T1;product=OE9A096223P1;Description=ethylene-responsive transcription factor ERF017-like;Ontology_term=GO:0003677%2C GO:0003700%2C GO:0005667%2C GO:0006355%2C GO:0045449
OE9A106653	8.97834	-3.51516	0.989721	-3.55167	0.000382791	0.00296151	ID=OE9A106653T1;Parent=OE9A106653;Name=OE9A106653T1;product=OE9A106653P1;Description=pyruvate, phosphate dikinase, chloroplastic;Ontology_term=GO:0005524%2C GO:0006090%2C GO:0015976%2C GO:0016301%2C GO:0016310%2C GO:0046872%2C GO:0050242
OE9A078448	18.914	-3.51399	0.715598	-4.91057	9.08121e-07	1.37105e-05	ID=OE9A078448T1;Parent=OE9A078448;Name=OE9A078448T1;product=OE9A078448P1;Description=GATA transcription factor 8-like;Ontology_term=GO:0000785%2C GO:0000977%2C GO:0001085%2C GO:0001228%2C GO:0003682%2C GO:0005634%2C GO:0005667%2C GO:0008270%2C GO:0030154%2C GO:0045893
OE9A096960	1570.32	-3.49676	0.330387	-10.5838	3.5421e-26	6.5027e-24	ID=OE9A096960T1;Parent=OE9A096960;Name=OE9A096960T1;product=OE9A096960P1;Description=probable WRKY transcription factor 53;Ontology_term=GO:0003700%2C GO:0005667%2C GO:0006355%2C GO:0043565%2C GO:0045449
OE9A117357	4.23312	-3.49526	1.46182	-2.39103	0.0168011	0.0662127	ID=OE9A117357T1;Parent=OE9A117357;Name=OE9A117357T1;product=OE9A117357P1
OE9A081200	154.615	-3.48545	0.382293	-9.1172	7.70872e-20	7.92948e-18	ID=OE9A081200T1;Parent=OE9A081200;Name=OE9A081200T1;product=OE9A081200P1;Description=MYB-related transcription factor;Ontology_term=GO:0003677
OE9A016967	48.0229	-3.4781	0.69195	-5.02652	4.99454e-07	7.96835e-06	ID=OE9A016967T1;Parent=OE9A016967;Name=OE9A016967T1;product=OE9A016967P1;Description=ethylene-responsive transcription factor ERF014-like;Ontology_term=GO:0003677%2C GO:0003700%2C GO:0005667%2C GO:0006355%2C GO:0045449
OE9A095378	369.683	-3.47217	0.892267	-3.8914	9.96674e-05	0.000924665	ID=OE9A095378T1;Parent=OE9A095378;Name=OE9A095378T1;product=OE9A095378P1;Description=ethylene-responsive transcription factor ERF017-like;Ontology_term=GO:0003677%2C GO:0003700%2C GO:0005667%2C GO:0006355%2C GO:0045449
OE9A024350	116.439	-3.45473	0.506352	-6.82278	8.92985e-12	3.22059e-10	ID=OE9A024350T1;Parent=OE9A024350;Name=OE9A024350T1;product=OE9A024350P1
OE9A023796	267.613	-3.45112	0.373368	-9.24323	2.39161e-20	2.58059e-18	ID=OE9A023796T1;Parent=OE9A023796;Name=OE9A023796T1;product=OE9A023796P1;Description=basic leucine zipper 43-like;Ontology_term=GO:0003700%2C GO:0005667%2C GO:0006355%2C GO:0016740%2C GO:0043565%2C GO:0045449
OE9A019254	876.154	-3.44634	0.66495	-5.18285	2.1852e-07	3.72696e-06	ID=OE9A019254T1;Parent=OE9A019254;Name=OE9A019254T1;product=OE9A019254P1;Description=BON1-associated 2-like;Ontology_term=GO:0005515
OE9A102331	4117.53	-3.43484	0.28979	-11.8529	2.07977e-32	6.10897e-30	ID=OE9A102331T1;Parent=OE9A102331;Name=OE9A102331T1;product=OE9A102331P1;Description=aspartic ase PCS1-like;Ontology_term=GO:0004190%2C GO:0006508%2C GO:0030163
OE9A020785	3.93211	-3.43227	1.08653	-3.15892	0.00158355	0.00992008	ID=OE9A020785T1;Parent=OE9A020785;Name=OE9A020785T1;product=OE9A020785P1;Description=cytochrome P450 71A8-like;Ontology_term=GO:0005506%2C GO:0016021%2C GO:0016709%2C GO:0020037%2C GO:0044550%2C GO:0055114
OE9A034435	44.2954	-3.42935	0.507357	-6.75924	1.38716e-11	4.86351e-10	ID=OE9A034435T1;Parent=OE9A034435;Name=OE9A034435T1;product=OE9A034435P1;Description=probable serine threonine- kinase At1g54610;Ontology_term=GO:0004674%2C GO:0005524%2C GO:0006468%2C GO:0009069
OE9A022026	194.153	-3.4259	0.220124	-15.5635	1.28875e-54	1.70347e-51	ID=OE9A022026T1;Parent=OE9A022026;Name=OE9A022026T1;product=OE9A022026P1;Description=U-box domain-containing 8;Ontology_term=GO:0004842%2C GO:0005488%2C GO:0005634%2C GO:0005737%2C GO:0016567
OE9A071160	8.76019	-3.4246	1.34791	-2.54067	0.0110641	0.0478706	ID=OE9A071160T1;Parent=OE9A071160;Name=OE9A071160T1;product=OE9A071160P1;Description=(E,E)-geranyllinalool synthase;Ontology_term=GO:0000287%2C GO:0008152%2C GO:0010333
OE9A079911	379.065	-3.41632	0.962735	-3.54856	0.000387342	0.00298972	ID=OE9A079911T1;Parent=OE9A079911;Name=OE9A079911T1;product=OE9A079911P1;Description=ethylene-responsive transcription factor ERF109-like;Ontology_term=GO:0003677%2C GO:0003700%2C GO:0005667%2C GO:0006355%2C GO:0045449
OE9A108292	6.42333	-3.41401	1.03158	-3.3095	0.000934618	0.00635319	ID=OE9A108292T1;Parent=OE9A108292;Name=OE9A108292T1;product=OE9A108292P1;Description=vetispiradiene synthase 2-like;Ontology_term=GO:0000287%2C GO:0008152%2C GO:0010333
OE9A016793	5372.17	-3.40768	0.613232	-5.55692	2.7458e-08	5.5242e-07	ID=OE9A016793T1;Parent=OE9A016793;Name=OE9A016793T1;product=OE9A016793P1;Description=E3 ubiquitin- ligase RING1;Ontology_term=GO:0005515%2C GO:0008270
OE9A079778	1227.34	-3.40275	0.290421	-11.7166	1.04804e-31	2.85629e-29	ID=OE9A079778T1;Parent=OE9A079778;Name=OE9A079778T1;product=OE9A079778P1;Description=uncharacterized protein LOC111384690;Ontology_term=GO:0016021
OE9A026208	320.714	-3.40063	0.914835	-3.7172	0.00020144	0.0016992	ID=OE9A026208T1;Parent=OE9A026208;Name=OE9A026208T1;product=OE9A026208P1
OE9A049638	1984.96	-3.39615	0.261133	-13.0054	1.1393e-38	5.19286e-36	ID=OE9A049638T1;Parent=OE9A049638;Name=OE9A049638T1;product=OE9A049638P1;Description=calcium-binding allergen Ole e 8-like;Ontology_term=GO:0005509
OE9A014390	511.103	-3.39536	0.534623	-6.35095	2.13985e-10	6.22322e-09	ID=OE9A014390T1;Parent=OE9A014390;Name=OE9A014390T1;product=OE9A014390P1;Description=RING-H2 finger ATL60-like;Ontology_term=GO:0005515%2C GO:0008270%2C GO:0044267
OE9A108608	209.008	-3.39313	0.349494	-9.70871	2.76825e-22	3.5015e-20	ID=OE9A108608T1;Parent=OE9A108608;Name=OE9A108608T1;product=OE9A108608P1;Description=NRT1 PTR FAMILY -like;Ontology_term=GO:0005215%2C GO:0006810%2C GO:0016021
OE9A061095	6.69879	-3.3803	0.859831	-3.93135	8.44698e-05	0.000799515	ID=OE9A061095T1;Parent=OE9A061095;Name=OE9A061095T1;product=OE9A061095P1;Description=NAC domain-containing 62-like;Ontology_term=GO:0003677%2C GO:0006355
OE9A009027	6.94777	-3.37768	1.19317	-2.83083	0.00464268	0.0238503	ID=OE9A009027T1;Parent=OE9A009027;Name=OE9A009027T1;product=OE9A009027P1;Description=beta-fructofuranosidase, insoluble isoenzyme 1-like;Ontology_term=GO:0004553%2C GO:0005975
OE9A013985	3247.71	-3.37722	0.528288	-6.39276	1.62915e-10	4.79602e-09	ID=OE9A013985T1;Parent=OE9A013985;Name=OE9A013985T1;product=OE9A013985P1;Description=zinc finger ZAT10-like;Ontology_term=GO:0046872
OE9A010028	6.4839	-3.37632	0.960348	-3.51572	0.000438561	0.00332296	ID=OE9A010028T1;Parent=OE9A010028;Name=OE9A010028T1;product=OE9A010028P1;Description=E3 ubiquitin- ligase PRT6;Ontology_term=GO:0008270
OE9A035601	397.352	-3.36732	0.573615	-5.87035	4.3487e-09	9.99672e-08	ID=OE9A035601T1;Parent=OE9A035601;Name=OE9A035601T1;product=OE9A035601P1
OE9A023009	320.509	-3.36404	0.554278	-6.06923	1.28526e-09	3.28119e-08	ID=OE9A023009T1;Parent=OE9A023009;Name=OE9A023009T1;product=OE9A023009P1
OE9A008141	38.8447	-3.35893	0.993086	-3.38231	0.000718781	0.00506712	ID=OE9A008141T1;Parent=OE9A008141;Name=OE9A008141T1;product=OE9A008141P1;Description=xyloglucan endotransglucosylase hydrolase 2-like;Ontology_term=GO:0004553%2C GO:0005618%2C GO:0010411%2C GO:0016762%2C GO:0042546%2C GO:0048046
OE9A090645	443.538	-3.35315	0.421092	-7.96298	1.67946e-15	9.69395e-14	ID=OE9A090645T1;Parent=OE9A090645;Name=OE9A090645T1;product=OE9A090645P1;Description=methanol O-anthraniloyltransferase;Ontology_term=GO:0016747
OE9A120349	13.7897	-3.34893	1.49661	-2.23767	0.0252424	0.0907162	ID=OE9A120349T1;Parent=OE9A120349;Name=OE9A120349T1;product=OE9A120349P1;Description=transcriptional corepressor LEUNIG-like isoform X1;Ontology_term=GO:0005515%2C GO:0016740
OE9A068607	593.906	-3.33578	0.552496	-6.03766	1.56366e-09	3.9182e-08	ID=OE9A068607T1;Parent=OE9A068607;Name=OE9A068607T1;product=OE9A068607P1;Description=calcium-binding PBP1-like;Ontology_term=GO:0005509
OE9A034153	584.287	-3.33457	0.281111	-11.8621	1.86169e-32	5.52984e-30	ID=OE9A034153T1;Parent=OE9A034153;Name=OE9A034153T1;product=OE9A034153P1;Description=E3 ubiquitin- ligase RHA1B-like;Ontology_term=GO:0005515%2C GO:0008270%2C GO:0016021
OE9A041553	232.167	-3.32946	0.387218	-8.5984	8.08323e-18	6.32214e-16	ID=OE9A041553T1;Parent=OE9A041553;Name=OE9A041553T1;product=OE9A041553P1;Description=two-component response regulator ARR5-like;Ontology_term=GO:0000160%2C GO:0005622
OE9A103609	9.65383	-3.32436	0.851674	-3.90333	9.488e-05	0.000885056	ID=OE9A103609T1;Parent=OE9A103609;Name=OE9A103609T1;product=OE9A103609P1;Description=transcription factor bHLH36-like;Ontology_term=GO:0046983
OE9A112030	3.59911	-3.32295	1.15927	-2.86641	0.00415154	0.0218887	ID=OE9A112030T1;Parent=OE9A112030;Name=OE9A112030T1;product=OE9A112030P1;Description=adenine guanine permease AZG2;Ontology_term=GO:0005345%2C GO:0015853%2C GO:0015854%2C GO:0016021%2C GO:1904823
OE9A081748	6.3	-3.32149	0.894972	-3.71128	0.000206216	0.00173395	ID=OE9A081748T1;Parent=OE9A081748;Name=OE9A081748T1;product=OE9A081748P1;Description=ethylene-responsive transcription factor ERF014-like;Ontology_term=GO:0003677%2C GO:0003700%2C GO:0005667%2C GO:0006355%2C GO:0045449
OE9A044833	395.743	-3.31742	0.414395	-8.00545	1.19032e-15	6.97723e-14	ID=OE9A044833T1;Parent=OE9A044833;Name=OE9A044833T1;product=OE9A044833P1;Description=methanol O-anthraniloyltransferase;Ontology_term=GO:0016747
OE9A046304	20.8505	-3.30971	0.716953	-4.61636	3.90534e-06	5.15435e-05	ID=OE9A046304T1;Parent=OE9A046304;Name=OE9A046304T1;product=OE9A046304P1
OE9A115883	694.153	-3.30386	0.857943	-3.85091	0.000117681	0.00106579	ID=OE9A115883T1;Parent=OE9A115883;Name=OE9A115883T1;product=OE9A115883P1;Description=calcium-binding CML19;Ontology_term=GO:0005509
OE9A047454	20.8391	-3.29589	0.865968	-3.80601	0.000141225	0.00125115	ID=OE9A047454T1;Parent=OE9A047454;Name=OE9A047454T1;product=OE9A047454P1;Description=ethylene-responsive transcription factor ERF109-like;Ontology_term=GO:0003677%2C GO:0003700%2C GO:0005667%2C GO:0006355%2C GO:0045449
OE9A119985	5.97198	-3.28343	1.24716	-2.63274	0.00846995	0.0388601	ID=OE9A119985T1;Parent=OE9A119985;Name=OE9A119985T1;product=OE9A119985P1;Description=ankyrin repeat-containing At5g02620-like;Ontology_term=GO:0005515
OE9A025905	83.5642	-3.2703	0.36435	-8.97572	2.81513e-19	2.68667e-17	ID=OE9A025905T1;Parent=OE9A025905;Name=OE9A025905T1;product=OE9A025905P1;Description=salicylic acid-binding 2-like;Ontology_term=GO:0009862%2C GO:0016042%2C GO:0016298%2C GO:0080031
OE9A083999	4.05388	-3.26822	1.46604	-2.22929	0.0257949	0.0921754	ID=OE9A083999T1;Parent=OE9A083999;Name=OE9A083999T1;product=OE9A083999P1;Description=proline-rich receptor kinase PERK6;Ontology_term=GO:0004674%2C GO:0005524%2C GO:0006468%2C GO:0009069%2C GO:0016021
OE9A015473	128.889	-3.26518	0.659027	-4.95455	7.24985e-07	1.12409e-05	ID=OE9A015473T1;Parent=OE9A015473;Name=OE9A015473T1;product=OE9A015473P1
OE9A069581	98.169	-3.26011	0.263259	-12.3836	3.20483e-35	1.11478e-32	ID=OE9A069581T1;Parent=OE9A069581;Name=OE9A069581T1;product=OE9A069581P1;Description=U-box domain-containing 8;Ontology_term=GO:0004842%2C GO:0005488%2C GO:0005634%2C GO:0005737%2C GO:0016567
OE9A090630	254.889	-3.23837	0.667936	-4.84833	1.24505e-06	1.83047e-05	ID=OE9A090630T1;Parent=OE9A090630;Name=OE9A090630T1;product=OE9A090630P1;Description=xyloglucan endotransglucosylase hydrolase 2-like;Ontology_term=GO:0004553%2C GO:0005618%2C GO:0010411%2C GO:0016021%2C GO:0016762%2C GO:0042546%2C GO:0048046%2C GO:0071555
OE9A016591	17.9311	-3.23767	0.600515	-5.39149	6.98776e-08	1.31292e-06	ID=OE9A016591T1;Parent=OE9A016591;Name=OE9A016591T1;product=OE9A016591P1;Description=isoprene synthase, chloroplastic-like;Ontology_term=GO:0000287%2C GO:0008152%2C GO:0009536%2C GO:0010333
OE9A114387	62.612	-3.22628	0.618776	-5.21397	1.84845e-07	3.19175e-06	ID=OE9A114387T1;Parent=OE9A114387;Name=OE9A114387T1;product=OE9A114387P1;Description=C-repeat dehydration-responsive element-binding factor 4;Ontology_term=GO:0003677%2C GO:0003700%2C GO:0005634%2C GO:0005667%2C GO:0006355%2C GO:0045449
OE9A066307	2983.27	-3.22458	0.49973	-6.45264	1.09916e-10	3.33611e-09	ID=OE9A066307T1;Parent=OE9A066307;Name=OE9A066307T1;product=OE9A066307P1;Description=ethylene-responsive transcription factor 4-like;Ontology_term=GO:0003677%2C GO:0003700%2C GO:0005667%2C GO:0006355%2C GO:0045449
OE9A014732	5.44234	-3.22006	1.18348	-2.72085	0.00651134	0.0313941	ID=OE9A014732T1;Parent=OE9A014732;Name=OE9A014732T1;product=OE9A014732P1;Description=nucleolar 14;Ontology_term=GO:0032040
OE9A044573	5.06228	-3.21518	1.38012	-2.32964	0.0198251	0.0752231	ID=OE9A044573T1;Parent=OE9A044573;Name=OE9A044573T1;product=OE9A044573P1;Description=DCN1 4;Ontology_term=GO:0000151%2C GO:0031624%2C GO:0032182%2C GO:0045116%2C GO:0051443%2C GO:0097602
OE9A086641	563.747	-3.21355	0.21395	-15.0201	5.42044e-51	5.30721e-48	ID=OE9A086641T1;Parent=OE9A086641;Name=OE9A086641T1;product=OE9A086641P1;Description=YLS9;Ontology_term=GO:0016021
OE9A063414	234.294	-3.21068	0.307175	-10.4523	1.43039e-25	2.48775e-23	ID=OE9A063414T1;Parent=OE9A063414;Name=OE9A063414T1;product=OE9A063414P1
OE9A045301	3552.96	-3.21055	0.511085	-6.28183	3.34617e-10	9.4206e-09	ID=OE9A045301T1;Parent=OE9A045301;Name=OE9A045301T1;product=OE9A045301P1;Description=ethylene-responsive transcription factor 4-like;Ontology_term=GO:0003677%2C GO:0003700%2C GO:0005667%2C GO:0006355%2C GO:0045449
OE9A105327	701.641	-3.20131	0.179911	-17.7939	7.88571e-71	2.97809e-67	ID=OE9A105327T1;Parent=OE9A105327;Name=OE9A105327T1;product=OE9A105327P1;Description=auxin-induced 22D-like;Ontology_term=GO:0005515%2C GO:0005634%2C GO:0006355%2C GO:0009734
OE9A069927	1014.21	-3.19481	0.349205	-9.14882	5.75581e-20	6.06218e-18	ID=OE9A069927T1;Parent=OE9A069927;Name=OE9A069927T1;product=OE9A069927P1
OE9A078709	3.69923	-3.19325	1.38689	-2.30245	0.0213098	0.0794787	ID=OE9A078709T1;Parent=OE9A078709;Name=OE9A078709T1;product=OE9A078709P1;Description=crocetin glucosyltransferase, chloroplastic-like;Ontology_term=GO:0008152%2C GO:0009507%2C GO:0016758
OE9A035167	49.6841	-3.19144	0.516894	-6.17427	6.6469e-10	1.78032e-08	ID=OE9A035167T1;Parent=OE9A035167;Name=OE9A035167T1;product=OE9A035167P1;Description=anthocyanin 5-aromatic acyltransferase-like;Ontology_term=GO:0016747
OE9A024806	6.1742	-3.18783	0.840448	-3.79301	0.000148832	0.00130802	ID=OE9A024806T1;Parent=OE9A024806;Name=OE9A024806T1;product=OE9A024806P1;Description=probable calcium-binding CML18;Ontology_term=GO:0005509
OE9A063462	39.2705	-3.17156	0.72657	-4.36511	1.27056e-05	0.000148229	ID=OE9A063462T1;Parent=OE9A063462;Name=OE9A063462T1;product=OE9A063462P1;Description=18 kDa seed maturation -like;Ontology_term=GO:0009790
OE9A090491	9.0106	-3.16283	0.916089	-3.45253	0.000555347	0.00403883	ID=OE9A090491T1;Parent=OE9A090491;Name=OE9A090491T1;product=OE9A090491P1
OE9A025153	101.711	-3.16193	0.383759	-8.23936	1.73129e-16	1.11903e-14	ID=OE9A025153T1;Parent=OE9A025153;Name=OE9A025153T1;product=OE9A025153P1;Description=salicylic acid-binding 2-like;Ontology_term=GO:0009862%2C GO:0016042%2C GO:0016298%2C GO:0080031
OE9A084022	8.89252	-3.15391	1.13571	-2.77704	0.0054856	0.0273102	ID=OE9A084022T1;Parent=OE9A084022;Name=OE9A084022T1;product=OE9A084022P1
OE9A114943	4.83368	-3.15038	1.42193	-2.21556	0.0267215	0.0946803	ID=OE9A114943T1;Parent=OE9A114943;Name=OE9A114943T1;product=OE9A114943P1
OE9A055181	639.288	-3.14945	0.420233	-7.49454	6.65324e-14	3.20373e-12	ID=OE9A055181T1;Parent=OE9A055181;Name=OE9A055181T1;product=OE9A055181P1;md5=54b89b91785ba007208854a382c65897;INTERPRO=<table><tr><th>DB</th><th>ID</th><th>Description</th></tr><tr><td>Gene3D</td><td>G3DSA:1.50.30.10</td><td></td></tr><tr><td>PANTHER</td><td>PTHR31225</td><td></td></tr><tr><td>PANTHER</td><td>PTHR31225:SF5</td><td></td></tr><tr><td>Pfam</td><td>PF01397</td><td>Terpene synthase%2C…
OE9A120905	4.53984	-3.13972	1.18078	-2.65903	0.00783664	0.0364722	ID=OE9A120905T1;Parent=OE9A120905;Name=OE9A120905T1;product=OE9A120905P1;Description=probable aquaporin TIP3-2;Ontology_term=GO:0005887%2C GO:0006833%2C GO:0009705%2C GO:0009992%2C GO:0015250%2C GO:0015254%2C GO:0015793%2C GO:0034220%2C GO:0042807
OE9A002862	3.61085	-3.12793	1.41529	-2.2101	0.0270985	0.0956699	ID=OE9A002862T1;Parent=OE9A002862;Name=OE9A002862T1;product=OE9A002862P1;Description=glucan endo-1,3-beta-glucosidase;Ontology_term=GO:0004553%2C GO:0005975%2C GO:0016021
OE9A090531	663.261	-3.12073	0.375548	-8.30981	9.58566e-17	6.46445e-15	ID=OE9A090531T1;Parent=OE9A090531;Name=OE9A090531T1;product=OE9A090531P1;Description=3-ketoacyl- synthase 20-like;Ontology_term=GO:0006633%2C GO:0016021%2C GO:0016747
OE9A113903	2371.35	-3.11428	0.279475	-11.1433	7.72077e-29	1.7904e-26	ID=OE9A113903T1;Parent=OE9A113903;Name=OE9A113903T1;product=OE9A113903P1;Description=glutaredoxin domain-containing cysteine-rich 1;Ontology_term=GO:0005623%2C GO:0006118%2C GO:0009055%2C GO:0015035%2C GO:0045454
OE9A059114	168.064	-3.1138	0.442325	-7.03963	1.92755e-12	7.54915e-11	ID=OE9A059114T1;Parent=OE9A059114;Name=OE9A059114T1;product=OE9A059114P1
OE9A114987	22.0633	-3.11265	0.478136	-6.50997	7.51677e-11	2.35722e-09	ID=OE9A114987T1;Parent=OE9A114987;Name=OE9A114987T1;product=OE9A114987P1
OE9A006386	3818.86	-3.11073	0.490216	-6.34563	2.21516e-10	6.41402e-09	ID=OE9A006386T1;Parent=OE9A006386;Name=OE9A006386T1;product=OE9A006386P1;Description=zinc finger CCCH domain-containing 29-like;Ontology_term=GO:0005515%2C GO:0046872
OE9A043040	7298.95	-3.10904	0.47452	-6.55198	5.67791e-11	1.8041e-09	ID=OE9A043040T1;Parent=OE9A043040;Name=OE9A043040T1;product=OE9A043040P1;Description=zinc finger CCCH domain-containing 29-like;Ontology_term=GO:0005515%2C GO:0046872
OE9A105623	151.505	-3.10537	0.491699	-6.31558	2.69147e-10	7.6672e-09	ID=OE9A105623T1;Parent=OE9A105623;Name=OE9A105623T1;product=OE9A105623P1;Description=probable CCR4-associated factor 1 homolog 11;Ontology_term=GO:0000175%2C GO:0000288%2C GO:0003676%2C GO:0005634%2C GO:0030014%2C GO:0051252
OE9A065557	707.239	-3.10331	0.285445	-10.8718	1.57031e-27	3.16891e-25	ID=OE9A065557T1;Parent=OE9A065557;Name=OE9A065557T1;product=OE9A065557P1;Description=RNA polymerase sigma factor sigE, chloroplastic mitochondrial;Ontology_term=GO:0001053%2C GO:0003677%2C GO:0003700%2C GO:0005667%2C GO:0005739%2C GO:0006352%2C GO:0009507%2C GO:0009658%2C GO:0010207%2C GO:0045449%2C GO:0045893
OE9A015812	297.179	-3.09379	0.304984	-10.1441	3.51995e-24	5.44172e-22	ID=OE9A015812T1;Parent=OE9A015812;Name=OE9A015812T1;product=OE9A015812P1;Description=zinc finger CONSTANS-LIKE 4-like;Ontology_term=GO:0005622%2C GO:0008270
OE9A114645	6738.69	-3.09098	0.362275	-8.53214	1.43667e-17	1.09137e-15	ID=OE9A114645T1;Parent=OE9A114645;Name=OE9A114645T1;product=OE9A114645P1;Description=ethylene-responsive transcription factor 4;Ontology_term=GO:0003677%2C GO:0003700%2C GO:0005667%2C GO:0006355%2C GO:0045449
OE9A100371	8.25114	-3.08784	1.16722	-2.64547	0.00815779	0.0376698	ID=OE9A100371T1;Parent=OE9A100371;Name=OE9A100371T1;product=OE9A100371P1;Description=berberine bridge enzyme-like 18;Ontology_term=GO:0016614%2C GO:0050660%2C GO:0055114
OE9A007137	423.79	-3.07716	0.402208	-7.65067	1.99935e-14	1.0184e-12	ID=OE9A007137T1;Parent=OE9A007137;Name=OE9A007137T1;product=OE9A007137P1
OE9A110626	3425.59	-3.07693	0.343752	-8.95101	3.52247e-19	3.30213e-17	ID=OE9A110626T1;Parent=OE9A110626;Name=OE9A110626T1;product=OE9A110626P1;Description=unnamed protein product;Ontology_term=GO:0016021
OE9A081176	654.838	-3.0741	0.205969	-14.925	2.26582e-50	2.13926e-47	ID=OE9A081176T1;Parent=OE9A081176;Name=OE9A081176T1;product=OE9A081176P1;Description=pentatricopeptide repeat-containing At5g13770, chloroplastic;Ontology_term=GO:0005515
OE9A118827	158.188	-3.07151	0.478938	-6.41316	1.42538e-10	4.23386e-09	ID=OE9A118827T1;Parent=OE9A118827;Name=OE9A118827T1;product=OE9A118827P1;Description=ethylene-responsive transcription factor ERF014-like;Ontology_term=GO:0003677%2C GO:0003700%2C GO:0005667%2C GO:0006355%2C GO:0045449
OE9A104327	532.759	-3.06161	0.420519	-7.28055	3.32472e-13	1.45517e-11	ID=OE9A104327T1;Parent=OE9A104327;Name=OE9A104327T1;product=OE9A104327P1;Description=uncharacterized protein LOC105179443;Ontology_term=GO:0016021
OE9A030676	22.9744	-3.06035	0.56561	-5.41071	6.27746e-08	1.18961e-06	ID=OE9A030676T1;Parent=OE9A030676;Name=OE9A030676T1;product=OE9A030676P1
OE9A121276	6221.26	-3.05828	0.607934	-5.03061	4.88917e-07	7.80968e-06	ID=OE9A121276T1;Parent=OE9A121276;Name=OE9A121276T1;product=OE9A121276P1;Description=SENESCENCE-ASSOCIATED GENE 21, mitochondrial-like;Ontology_term=GO:0006950
OE9A050117	36.5509	-3.05446	0.478464	-6.38388	1.72659e-10	5.06033e-09	ID=OE9A050117T1;Parent=OE9A050117;Name=OE9A050117T1;product=OE9A050117P1
OE9A028936	100.91	-3.04687	0.438582	-6.9471	3.72863e-12	1.41624e-10	ID=OE9A028936T1;Parent=OE9A028936;Name=OE9A028936T1;product=OE9A028936P1;Description=oxalate-- ligase-like;Ontology_term=GO:0009805%2C GO:0009809%2C GO:0009811%2C GO:0016207
OE9A070773	8.35893	-3.04454	0.655366	-4.64556	3.39147e-06	4.5373e-05	ID=OE9A070773T1;Parent=OE9A070773;Name=OE9A070773T1;product=OE9A070773P1;Description=transcription factor bHLH162-like;Ontology_term=GO:0000977%2C GO:0003700%2C GO:0006357%2C GO:0045449%2C GO:0046983%2C GO:0090575
OE9A077751	291.473	-3.03926	0.282596	-10.7548	5.62773e-27	1.07032e-24	ID=OE9A077751T1;Parent=OE9A077751;Name=OE9A077751T1;product=OE9A077751P1;Description=spermidine hydroxycinnamoyl transferase-like;Ontology_term=GO:0016747
OE9A006737	692.245	-3.03436	0.510016	-5.94954	2.68893e-09	6.3925e-08	ID=OE9A006737T1;Parent=OE9A006737;Name=OE9A006737T1;product=OE9A006737P1;Description=serine threonine- kinase CCR4;Ontology_term=GO:0004672%2C GO:0005524%2C GO:0006468%2C GO:0016020
OE9A024216	587.925	-3.03386	0.429842	-7.05808	1.68814e-12	6.67079e-11	ID=OE9A024216T1;Parent=OE9A024216;Name=OE9A024216T1;product=OE9A024216P1
OE9A099586	7.89175	-3.02802	0.948139	-3.19365	0.00140487	0.00895353	ID=OE9A099586T1;Parent=OE9A099586;Name=OE9A099586T1;product=OE9A099586P1;Description=probable E3 ubiquitin- ligase LUL4;Ontology_term=GO:0005515%2C GO:0008270
OE9A000795	15.9421	-3.02489	0.737611	-4.10092	4.11504e-05	0.000419696	ID=OE9A000795T1;Parent=OE9A000795;Name=OE9A000795T1;product=OE9A000795P1;Description=GATA transcription factor 8-like;Ontology_term=GO:0000785%2C GO:0000977%2C GO:0001085%2C GO:0001228%2C GO:0003682%2C GO:0005634%2C GO:0005667%2C GO:0008270%2C GO:0030154%2C GO:0045893
OE9A058653	59.2108	-3.02221	0.460391	-6.56445	5.22251e-11	1.67551e-09	ID=OE9A058653T1;Parent=OE9A058653;Name=OE9A058653T1;product=OE9A058653P1;Description=methanol O-anthraniloyltransferase-like;Ontology_term=GO:0016747
OE9A058421	348.409	-3.02039	0.301887	-10.005	1.44834e-23	2.09225e-21	ID=OE9A058421T1;Parent=OE9A058421;Name=OE9A058421T1;product=OE9A058421P1;Description=PROTON GRADIENT REGULATION 5, chloroplastic;Ontology_term=GO:0006118%2C GO:0009055%2C GO:0009414%2C GO:0009535%2C GO:0009644%2C GO:0009773%2C GO:0010117%2C GO:0071484
OE9A058786	194.391	-3.00186	0.318708	-9.41885	4.56063e-21	5.21926e-19	ID=OE9A058786T1;Parent=OE9A058786;Name=OE9A058786T1;product=OE9A058786P1
OE9A073431	138.6	-2.99807	0.328246	-9.13361	6.62538e-20	6.89562e-18	ID=OE9A073431T1;Parent=OE9A073431;Name=OE9A073431T1;product=OE9A073431P1
OE9A021852	89.0586	-2.98795	0.716151	-4.17223	3.01627e-05	0.000318443	ID=OE9A021852T1;Parent=OE9A021852;Name=OE9A021852T1;product=OE9A021852P1
OE9A117400	201.174	-2.98377	0.418942	-7.12215	1.06254e-12	4.33478e-11	ID=OE9A117400T1;Parent=OE9A117400;Name=OE9A117400T1;product=OE9A117400P1
OE9A106917	12.6383	-2.97875	0.769344	-3.8718	0.000108033	0.000991993	ID=OE9A106917T1;Parent=OE9A106917;Name=OE9A106917T1;product=OE9A106917P1
OE9A026219	927.336	-2.97544	0.253618	-11.7319	8.74234e-32	2.40742e-29	ID=OE9A026219T1;Parent=OE9A026219;Name=OE9A026219T1;product=OE9A026219P1;Description=NAD(P)H-quinone oxidoreductase subunit T, chloroplastic;Ontology_term=GO:0009535%2C GO:0010598%2C GO:0016021
OE9A045269	721.403	-2.97406	1.02935	-2.88927	0.00386137	0.0206346	ID=OE9A045269T1;Parent=OE9A045269;Name=OE9A045269T1;product=OE9A045269P1;Description=E3 ubiquitin- ligase PUB23-like;Ontology_term=GO:0004842%2C GO:0005488%2C GO:0016567%2C GO:0016874
OE9A013411	7.90183	-2.97148	0.674992	-4.40224	1.0714e-05	0.000127462	ID=OE9A013411T1;Parent=OE9A013411;Name=OE9A013411T1;product=OE9A013411P1;Description=auxin efflux carrier component 7-like isoform X1;Ontology_term=GO:0005783%2C GO:0005886%2C GO:0009926%2C GO:0010252%2C GO:0010315%2C GO:0010329%2C GO:0016021%2C GO:0055085
OE9A006256	122.126	-2.96576	0.392641	-7.55337	4.24149e-14	2.09194e-12	ID=OE9A006256T1;Parent=OE9A006256;Name=OE9A006256T1;product=OE9A006256P1
OE9A053339	3890.56	-2.96318	0.281825	-10.5142	7.42808e-26	1.34499e-23	ID=OE9A053339T1;Parent=OE9A053339;Name=OE9A053339T1;product=OE9A053339P1;Description=ethylene-responsive transcription factor 4-like;Ontology_term=GO:0003677%2C GO:0003700%2C GO:0005667%2C GO:0006355%2C GO:0045449
OE9A109113	2927.88	-2.96249	0.322354	-9.19018	3.92185e-20	4.16378e-18	ID=OE9A109113T1;Parent=OE9A109113;Name=OE9A109113T1;product=OE9A109113P1;Description=ethylene-responsive transcription factor 4-like;Ontology_term=GO:0003677%2C GO:0003700%2C GO:0005667%2C GO:0006355%2C GO:0045449
OE9A043355	3021.67	-2.95909	0.363003	-8.15171	3.58818e-16	2.21112e-14	ID=OE9A043355T1;Parent=OE9A043355;Name=OE9A043355T1;product=OE9A043355P1
OE9A105581	173.175	-2.95868	0.450982	-6.56053	5.36179e-11	1.71208e-09	ID=OE9A105581T1;Parent=OE9A105581;Name=OE9A105581T1;product=OE9A105581P1;Description=dehydration-responsive element-binding 1E-like;Ontology_term=GO:0003677%2C GO:0003700%2C GO:0005634%2C GO:0005667%2C GO:0006355%2C GO:0045449
OE9A048904	22.6941	-2.95802	0.393694	-7.51349	5.75697e-14	2.79763e-12	ID=OE9A048904T1;Parent=OE9A048904;Name=OE9A048904T1;product=OE9A048904P1;Description=RING-H2 finger ATL2-like;Ontology_term=GO:0005515%2C GO:0008270
OE9A086630	12.39	-2.95413	0.765801	-3.85756	0.000114523	0.00104075	ID=OE9A086630T1;Parent=OE9A086630;Name=OE9A086630T1;product=OE9A086630P1
OE9A099186	597.075	-2.95393	0.587145	-5.031	4.87919e-07	7.80317e-06	ID=OE9A099186T1;Parent=OE9A099186;Name=OE9A099186T1;product=OE9A099186P1;Description=zinc finger ZAT10-like;Ontology_term=GO:0003676%2C GO:0046872
OE9A006330	165.037	-2.95278	0.256691	-11.5033	1.27036e-30	3.29247e-28	ID=OE9A006330T1;Parent=OE9A006330;Name=OE9A006330T1;product=OE9A006330P1;Description=calmodulin 3;Ontology_term=GO:0005509
OE9A012474	519.943	-2.94618	0.3151	-9.34996	8.76795e-21	9.73906e-19	ID=OE9A012474T1;Parent=OE9A012474;Name=OE9A012474T1;product=OE9A012474P1;Description=uncharacterized protein LOC111411035;Ontology_term=GO:0005515
OE9A087830	8.34	-2.93887	0.930981	-3.15674	0.00159544	0.00997566	ID=OE9A087830T1;Parent=OE9A087830;Name=OE9A087830T1;product=OE9A087830P1
OE9A101792	1029.91	-2.9385	0.551849	-5.32483	1.01049e-07	1.84611e-06	ID=OE9A101792T1;Parent=OE9A101792;Name=OE9A101792T1;product=OE9A101792P1;Description=zinc finger ZAT10-like;Ontology_term=GO:0046872
OE9A056482	468.264	-2.93785	0.357208	-8.22448	1.96038e-16	1.25483e-14	ID=OE9A056482T1;Parent=OE9A056482;Name=OE9A056482T1;product=OE9A056482P1;Description=lectin-domain containing receptor kinase -like;Ontology_term=GO:0004672%2C GO:0005524%2C GO:0006468%2C GO:0016020%2C GO:0030246
OE9A036548	8.32025	-2.93746	0.909973	-3.22808	0.00124626	0.0081068	ID=OE9A036548T1;Parent=OE9A036548;Name=OE9A036548T1;product=OE9A036548P1
OE9A024899	9.99609	-2.93485	1.3156	-2.23082	0.0256933	0.0919243	ID=OE9A024899T1;Parent=OE9A024899;Name=OE9A024899T1;product=OE9A024899P1
OE9A037327	5425.67	-2.93047	0.374005	-7.83537	4.67452e-15	2.60159e-13	ID=OE9A037327T1;Parent=OE9A037327;Name=OE9A037327T1;product=OE9A037327P1;Description=NDR1 HIN1 3;Ontology_term=GO:0016021
OE9A082949	193.001	-2.92874	0.389811	-7.51323	5.7685e-14	2.79809e-12	ID=OE9A082949T1;Parent=OE9A082949;Name=OE9A082949T1;product=OE9A082949P1;Description=lectin-domain containing receptor kinase -like;Ontology_term=GO:0004674%2C GO:0005524%2C GO:0006468%2C GO:0009069%2C GO:0016021%2C GO:0030246
OE9A040538	3.37132	-2.92022	1.00436	-2.90755	0.00364272	0.0197172	ID=OE9A040538T1;Parent=OE9A040538;Name=OE9A040538T1;product=OE9A040538P1;Description=serine arginine-rich splicing factor RS40-like isoform X2;Ontology_term=GO:0000166%2C GO:0003676
OE9A037727	132.782	-2.90711	0.782058	-3.71726	0.000201397	0.0016992	ID=OE9A037727T1;Parent=OE9A037727;Name=OE9A037727T1;product=OE9A037727P1;Description=probable galacturonosyltransferase-like 10;Ontology_term=GO:0000271%2C GO:0005794%2C GO:0016757
OE9A038398	4473.13	-2.89662	0.564143	-5.13456	2.82802e-07	4.71385e-06	ID=OE9A038398T1;Parent=OE9A038398;Name=OE9A038398T1;product=OE9A038398P1;Description=SENESCENCE-ASSOCIATED GENE 21, mitochondrial-like;Ontology_term=GO:0006950
OE9A100460	599.93	-2.88884	0.369125	-7.82618	5.02914e-15	2.78722e-13	ID=OE9A100460T1;Parent=OE9A100460;Name=OE9A100460T1;product=OE9A100460P1
OE9A104316	3814.81	-2.88061	0.348904	-8.25615	1.50447e-16	9.79611e-15	ID=OE9A104316T1;Parent=OE9A104316;Name=OE9A104316T1;product=OE9A104316P1;Description=scarecrow 13;Ontology_term=GO:0003700%2C GO:0005634%2C GO:0005667%2C GO:0006355%2C GO:0043565%2C GO:0045449
OE9A096246	3.43749	-2.87379	1.07346	-2.67714	0.00742532	0.0349094	ID=OE9A096246T1;Parent=OE9A096246;Name=OE9A096246T1;product=OE9A096246P1;Description=ankyrin repeat-containing NPR4-like isoform X1;Ontology_term=GO:0005515%2C GO:0016020
OE9A052006	32.1278	-2.87338	0.506719	-5.67055	1.42341e-08	2.99835e-07	ID=OE9A052006T1;Parent=OE9A052006;Name=OE9A052006T1;product=OE9A052006P1
OE9A121290	4.36379	-2.86946	1.19029	-2.41073	0.0159206	0.0634709	ID=OE9A121290T1;Parent=OE9A121290;Name=OE9A121290T1;product=OE9A121290P1;Description=transcription factor bHLH13-like;Ontology_term=GO:0046983
OE9A083297	288.385	-2.86844	0.476021	-6.02586	1.68213e-09	4.1794e-08	ID=OE9A083297T1;Parent=OE9A083297;Name=OE9A083297T1;product=OE9A083297P1;Description=1-aminocyclopropane-1-carboxylate oxidase homolog 1-like;Ontology_term=GO:0016491%2C GO:0046872%2C GO:0055114
OE9A088381	4.08254	-2.86803	1.2964	-2.2123	0.0269459	0.0952204	ID=OE9A088381T1;Parent=OE9A088381;Name=OE9A088381T1;product=OE9A088381P1;Description=zinc finger CONSTANS-LIKE 5-like;Ontology_term=GO:0005515%2C GO:0005622%2C GO:0008270
OE9A082803	219.841	-2.86767	0.34948	-8.20552	2.29595e-16	1.46255e-14	ID=OE9A082803T1;Parent=OE9A082803;Name=OE9A082803T1;product=OE9A082803P1;Description=ATP-dependent zinc metalloprotease FTSH 6, chloroplastic;Ontology_term=GO:0004176%2C GO:0004222%2C GO:0005524%2C GO:0005739%2C GO:0006508%2C GO:0006510%2C GO:0009535%2C GO:0009941%2C GO:0010027%2C GO:0010205%2C GO:0010206%2C GO:0010304
OE9A034621	24.7192	-2.86629	0.626902	-4.57215	4.82751e-06	6.2193e-05	ID=OE9A034621T1;Parent=OE9A034621;Name=OE9A034621T1;product=OE9A034621P1
OE9A072702	344.163	-2.84433	0.397482	-7.15586	8.31472e-13	3.43987e-11	ID=OE9A072702T1;Parent=OE9A072702;Name=OE9A072702T1;product=OE9A072702P1
OE9A069158	56.0776	-2.8383	0.881116	-3.22126	0.00127628	0.00826404	ID=OE9A069158T1;Parent=OE9A069158;Name=OE9A069158T1;product=OE9A069158P1
OE9A078774	93.8072	-2.83363	0.471852	-6.00534	1.90935e-09	4.69104e-08	ID=OE9A078774T1;Parent=OE9A078774;Name=OE9A078774T1;product=OE9A078774P1
OE9A035109	49.7776	-2.8322	0.320156	-8.84632	9.04561e-19	8.10609e-17	ID=OE9A035109T1;Parent=OE9A035109;Name=OE9A035109T1;product=OE9A035109P1;Description=rapid alkalinization factor;Ontology_term=GO:0044699%2C GO:0050794
OE9A012128	7.67539	-2.8264	1.10054	-2.56819	0.010223	0.04496	ID=OE9A012128T1;Parent=OE9A012128;Name=OE9A012128T1;product=OE9A012128P1;Description=ethylene-responsive transcription factor ERF027-like;Ontology_term=GO:0003700%2C GO:0005634%2C GO:0005667%2C GO:0006355%2C GO:0019760%2C GO:0043565%2C GO:0044212%2C GO:0045449%2C GO:0050832
OE9A033137	242.067	-2.82432	0.434423	-6.50132	7.96206e-11	2.48213e-09	ID=OE9A033137T1;Parent=OE9A033137;Name=OE9A033137T1;product=OE9A033137P1;Description=dehydration-responsive element-binding 2A-like;Ontology_term=GO:0003677%2C GO:0003700%2C GO:0005667%2C GO:0006355%2C GO:0045449
OE9A049811	1442.87	-2.8242	0.524695	-5.38256	7.34321e-08	1.37389e-06	ID=OE9A049811T1;Parent=OE9A049811;Name=OE9A049811T1;product=OE9A049811P1;Description=zinc finger ZAT10-like;Ontology_term=GO:0046872
OE9A031038	3.35558	-2.80856	1.19596	-2.34837	0.0188555	0.072483	ID=OE9A031038T1;Parent=OE9A031038;Name=OE9A031038T1;product=OE9A031038P1;Description=F-box domain, cyclin;Ontology_term=GO:0005515
OE9A019029	101.213	-2.80758	0.567931	-4.94352	7.6724e-07	1.1806e-05	ID=OE9A019029T1;Parent=OE9A019029;Name=OE9A019029T1;product=OE9A019029P1;Description=ethylene-responsive transcription factor ERF027;Ontology_term=GO:0003677%2C GO:0003700%2C GO:0005667%2C GO:0006355%2C GO:0045449
OE9A088460	80.837	-2.80737	0.490705	-5.7211	1.05839e-08	2.28033e-07	ID=OE9A088460T1;Parent=OE9A088460;Name=OE9A088460T1;product=OE9A088460P1
OE9A016264	633.778	-2.8063	0.182628	-15.3662	2.75936e-53	3.17158e-50	ID=OE9A016264T1;Parent=OE9A016264;Name=OE9A016264T1;product=OE9A016264P1;Description=auxin-induced 22D-like;Ontology_term=GO:0005515%2C GO:0005634%2C GO:0006355%2C GO:0009734
OE9A101780	1140.77	-2.8061	0.32403	-8.66001	4.71724e-18	3.84892e-16	ID=OE9A101780T1;Parent=OE9A101780;Name=OE9A101780T1;product=OE9A101780P1;Description=zinc finger ZAT10-like;Ontology_term=GO:0046872
OE9A103792	421.464	-2.80323	0.454299	-6.17045	6.80954e-10	1.81835e-08	ID=OE9A103792T1;Parent=OE9A103792;Name=OE9A103792T1;product=OE9A103792P1
OE9A014923	2584.17	-2.80146	0.532337	-5.26257	1.42052e-07	2.5119e-06	ID=OE9A014923T1;Parent=OE9A014923;Name=OE9A014923T1;product=OE9A014923P1;Description=RING-H2 finger ATL2-like;Ontology_term=GO:0005515%2C GO:0008270%2C GO:0016020
OE9A096142	2020.59	-2.79831	0.257935	-10.8489	2.01816e-27	4.01143e-25	ID=OE9A096142T1;Parent=OE9A096142;Name=OE9A096142T1;product=OE9A096142P1
OE9A000186	7.04784	-2.79276	1.10233	-2.53351	0.0112926	0.0486288	ID=OE9A000186T1;Parent=OE9A000186;Name=OE9A000186T1;product=OE9A000186P1;Description=squamosa promoter-binding 7;Ontology_term=GO:0003677%2C GO:0005634
OE9A100730	13.662	-2.78994	0.816631	-3.4164	0.000634547	0.0045485	ID=OE9A100730T1;Parent=OE9A100730;Name=OE9A100730T1;product=OE9A100730P1;Description=secoisolariciresinol dehydrogenase-like;Ontology_term=GO:0016491%2C GO:0055114
OE9A051225	5.41861	-2.76896	1.01212	-2.73581	0.00622271	0.0302468	ID=OE9A051225T1;Parent=OE9A051225;Name=OE9A051225T1;product=OE9A051225P1;Description=transcription factor MYB102-like;Ontology_term=GO:0003677
OE9A112504	364.869	-2.76889	0.225949	-12.2545	1.58905e-34	5.31749e-32	ID=OE9A112504T1;Parent=OE9A112504;Name=OE9A112504T1;product=OE9A112504P1;Description=uncharacterized protein LOC111376643;Ontology_term=GO:0009507%2C GO:0016020
OE9A034538	11923.1	-2.76654	0.484827	-5.70625	1.15495e-08	2.47025e-07	ID=OE9A034538T1;Parent=OE9A034538;Name=OE9A034538T1;product=OE9A034538P1;Description=nematode resistance -like HSPRO2;Ontology_term=GO:0006952
OE9A031590	32.9383	-2.76344	0.767074	-3.60257	0.000315086	0.00249989	ID=OE9A031590T1;Parent=OE9A031590;Name=OE9A031590T1;product=OE9A031590P1;Description=NAC transcription factor 29-like;Ontology_term=GO:0003677%2C GO:0005634%2C GO:0006355%2C GO:0009825%2C GO:0009835%2C GO:0009908%2C GO:0010150
OE9A068770	157.08	-2.75987	0.359909	-7.66827	1.74335e-14	8.9664e-13	ID=OE9A068770T1;Parent=OE9A068770;Name=OE9A068770T1;product=OE9A068770P1;Description=lipid phosphate phosphatase epsilon 2, chloroplastic-like;Ontology_term=GO:0006651%2C GO:0006687%2C GO:0008195%2C GO:0009395%2C GO:0009507%2C GO:0016020
OE9A050511	48.5203	-2.75923	0.880655	-3.13316	0.00172937	0.0106556	ID=OE9A050511T1;Parent=OE9A050511;Name=OE9A050511T1;product=OE9A050511P1
OE9A015620	44.1641	-2.75707	0.481655	-5.72417	1.03939e-08	2.24856e-07	ID=OE9A015620T2;Parent=OE9A015620;Name=OE9A015620T2;product=OE9A015620P1
OE9A120192	234.036	-2.7524	0.4557	-6.03994	1.54169e-09	3.87416e-08	ID=OE9A120192T1;Parent=OE9A120192;Name=OE9A120192T1;product=OE9A120192P1
OE9A078479	216.12	-2.74887	0.251421	-10.9333	7.98499e-28	1.68873e-25	ID=OE9A078479T1;Parent=OE9A078479;Name=OE9A078479T1;product=OE9A078479P1;Description=U-box domain-containing 27-like;Ontology_term=GO:0004842%2C GO:0005515%2C GO:0016567
OE9A033515	253.706	-2.7454	0.289694	-9.4769	2.61961e-21	3.05075e-19	ID=OE9A033515T1;Parent=OE9A033515;Name=OE9A033515T1;product=OE9A033515P1;Description=zinc finger CONSTANS-LIKE 4-like;Ontology_term=GO:0005622%2C GO:0008270
OE9A004403	25.837	-2.73871	0.707599	-3.87042	0.000108649	0.000996962	ID=OE9A004403T1;Parent=OE9A004403;Name=OE9A004403T1;product=OE9A004403P1
OE9A033879	29.5824	-2.73854	1.07549	-2.54632	0.0108864	0.0472256	ID=OE9A033879T1;Parent=OE9A033879;Name=OE9A033879T1;product=OE9A033879P1;Description=ethylene-responsive transcription factor ERF109-like;Ontology_term=GO:0003677%2C GO:0003700%2C GO:0005667%2C GO:0006355%2C GO:0045449
OE9A118681	23.9519	-2.73353	0.440227	-6.20937	5.31966e-10	1.43794e-08	ID=OE9A118681T1;Parent=OE9A118681;Name=OE9A118681T1;product=OE9A118681P1;Description=myosin heavy chain kinase B-like;Ontology_term=GO:0005515
OE9A112928	1097.23	-2.73341	0.281914	-9.69591	3.1384e-22	3.93208e-20	ID=OE9A112928T1;Parent=OE9A112928;Name=OE9A112928T1;product=OE9A112928P1;Description=EIN3-binding F-box 1-like;Ontology_term=GO:0005515
OE9A051455	233.693	-2.73103	0.317786	-8.59391	8.40573e-18	6.51654e-16	ID=OE9A051455T1;Parent=OE9A051455;Name=OE9A051455T1;product=OE9A051455P1;Description=mitogen-activated kinase kinase kinase 18-like;Ontology_term=GO:0004672%2C GO:0005524%2C GO:0006468%2C GO:0016020
OE9A107039	1076.16	-2.72793	0.339287	-8.04019	8.97012e-16	5.30501e-14	ID=OE9A107039T1;Parent=OE9A107039;Name=OE9A107039T1;product=OE9A107039P1
OE9A000364	76.7704	-2.7242	0.475126	-5.73364	9.82995e-09	2.13354e-07	ID=OE9A000364T1;Parent=OE9A000364;Name=OE9A000364T1;product=OE9A000364P1;Description=lignin-forming anionic peroxidase;Ontology_term=GO:0004601%2C GO:0005576%2C GO:0006804%2C GO:0006979%2C GO:0020037%2C GO:0042744%2C GO:0046872%2C GO:0055114%2C GO:0098869
OE9A002387	76.5736	-2.71752	0.365433	-7.43643	1.03439e-13	4.80582e-12	ID=OE9A002387T1;Parent=OE9A002387;Name=OE9A002387T1;product=OE9A002387P1
OE9A118995	16.8703	-2.71509	0.634289	-4.28053	1.86446e-05	0.000208763	ID=OE9A118995T1;Parent=OE9A118995;Name=OE9A118995T1;product=OE9A118995P1
OE9A079143	5.70436	-2.71486	0.894539	-3.03493	0.00240595	0.0140654	ID=OE9A079143T1;Parent=OE9A079143;Name=OE9A079143T1;product=OE9A079143P1;Description=NRT1 PTR FAMILY -like;Ontology_term=GO:0005215%2C GO:0006810%2C GO:0016021
OE9A098640	5.33034	-2.70193	1.22646	-2.20302	0.0275931	0.0969241	ID=OE9A098640T1;Parent=OE9A098640;Name=OE9A098640T1;product=OE9A098640P1;Description=probable aquaporin NIP-type;Ontology_term=GO:0005887%2C GO:0006833%2C GO:0009992%2C GO:0015250%2C GO:0015254%2C GO:0015793%2C GO:0034220
OE9A049838	15.7629	-2.6989	0.626219	-4.30984	1.63371e-05	0.000185758	ID=OE9A049838T1;Parent=OE9A049838;Name=OE9A049838T1;product=OE9A049838P1;Description=BTR1 isoform X2;Ontology_term=GO:0003723
OE9A104782	1819.96	-2.69875	0.311455	-8.66498	4.51601e-18	3.70761e-16	ID=OE9A104782T1;Parent=OE9A104782;Name=OE9A104782T1;product=OE9A104782P1;Description=expansin-like A2;Ontology_term=GO:0005576%2C GO:0009505%2C GO:0009506%2C GO:0016020%2C GO:0019953
OE9A084330	391.057	-2.69237	0.525028	-5.12805	2.92751e-07	4.86435e-06	ID=OE9A084330T1;Parent=OE9A084330;Name=OE9A084330T1;product=OE9A084330P1;Description=ethylene-responsive transcription factor 5-like;Ontology_term=GO:0003677%2C GO:0003700%2C GO:0005667%2C GO:0006355%2C GO:0045449
OE9A060709	62.0188	-2.68956	0.585552	-4.59321	4.36483e-06	5.67299e-05	ID=OE9A060709T1;Parent=OE9A060709;Name=OE9A060709T1;product=OE9A060709P1
OE9A103169	15.7918	-2.68606	0.605723	-4.43447	9.22994e-06	0.000111672	ID=OE9A103169T1;Parent=OE9A103169;Name=OE9A103169T1;product=OE9A103169P1;Description=ankyrin repeat-containing BDA1-like;Ontology_term=GO:0005515
OE9A103543	331.328	-2.68528	0.395238	-6.79409	1.09001e-11	3.86784e-10	ID=OE9A103543T1;Parent=OE9A103543;Name=OE9A103543T1;product=OE9A103543P1
OE9A010897	35.4819	-2.68219	0.58386	-4.59388	4.35074e-06	5.65746e-05	ID=OE9A010897T1;Parent=OE9A010897;Name=OE9A010897T1;product=OE9A010897P1;Description=NDR1 HIN1 13;Ontology_term=GO:0016020
OE9A052531	41.9273	-2.6785	0.427205	-6.26983	3.61448e-10	1.01007e-08	ID=OE9A052531T1;Parent=OE9A052531;Name=OE9A052531T1;product=OE9A052531P1
OE9A090615	1355.9	-2.67817	0.336709	-7.95397	1.80627e-15	1.0358e-13	ID=OE9A090615T1;Parent=OE9A090615;Name=OE9A090615T1;product=OE9A090615P1
OE9A011543	8165.76	-2.66906	0.226737	-11.7716	5.46734e-32	1.52142e-29	ID=OE9A011543T1;Parent=OE9A011543;Name=OE9A011543T1;product=OE9A011543P1;Description=inactive beta-amylase 9;Ontology_term=GO:0000272%2C GO:0005982%2C GO:0005985%2C GO:0016161
OE9A058239	3.62133	-2.66651	1.17131	-2.27653	0.0228145	0.0839656	ID=OE9A058239T1;Parent=OE9A058239;Name=OE9A058239T1;product=OE9A058239P1
OE9A046119	120.376	-2.65881	0.723571	-3.67457	0.00023825	0.00196272	ID=OE9A046119T1;Parent=OE9A046119;Name=OE9A046119T1;product=OE9A046119P1;Description=cytochrome P450 78A3-like;Ontology_term=GO:0005506%2C GO:0016021%2C GO:0016709%2C GO:0020037%2C GO:0044550%2C GO:0055114
OE9A107850	223.188	-2.65383	0.292111	-9.085	1.03702e-19	1.04636e-17	ID=OE9A107850T1;Parent=OE9A107850;Name=OE9A107850T1;product=OE9A107850P1;Description=premnaspirodiene oxygenase-like;Ontology_term=GO:0004497%2C GO:0005506%2C GO:0016020%2C GO:0016705%2C GO:0020037%2C GO:0055114
OE9A043154	5435.36	-2.65172	0.351847	-7.53656	4.82517e-14	2.36657e-12	ID=OE9A043154T1;Parent=OE9A043154;Name=OE9A043154T1;product=OE9A043154P1;Description=zinc finger CCCH domain-containing 29-like;Ontology_term=GO:0005515%2C GO:0046872
OE9A049350	559.314	-2.65062	0.319827	-8.28767	1.15492e-16	7.6712e-15	ID=OE9A049350T1;Parent=OE9A049350;Name=OE9A049350T1;product=OE9A049350P1;Description=UDP-glycosyltransferase 74F2-like;Ontology_term=GO:0009813%2C GO:0043231%2C GO:0052696%2C GO:0080043%2C GO:0080044
OE9A098652	435.84	-2.64192	0.388382	-6.80237	1.02908e-11	3.67137e-10	ID=OE9A098652T1;Parent=OE9A098652;Name=OE9A098652T1;product=OE9A098652P1
OE9A009435	496.739	-2.638	0.734135	-3.59334	0.00032646	0.00257621	ID=OE9A009435T1;Parent=OE9A009435;Name=OE9A009435T1;product=OE9A009435P1;Description=auxin-responsive SAUR36-like;Ontology_term=GO:0009733
OE9A031439	138.211	-2.63593	0.392635	-6.71342	1.90112e-11	6.45991e-10	ID=OE9A031439T1;Parent=OE9A031439;Name=OE9A031439T1;product=OE9A031439P1;Description=nuclear transcription factor Y subunit A-1-like isoform X1;Ontology_term=GO:0003677%2C GO:0003700%2C GO:0006355%2C GO:0016602%2C GO:0045449
OE9A023438	8.71853	-2.63445	0.698596	-3.77106	0.000162555	0.00140896	ID=OE9A023438T1;Parent=OE9A023438;Name=OE9A023438T1;product=OE9A023438P1;Description=probable glucan endo-1,3-beta-glucosidase A6;Ontology_term=GO:0004553%2C GO:0005975
OE9A022845	122.375	-2.63317	0.646584	-4.07243	4.65246e-05	0.000467119	ID=OE9A022845T1;Parent=OE9A022845;Name=OE9A022845T1;product=OE9A022845P1
OE9A031893	75.8689	-2.63314	0.447962	-5.87805	4.15121e-09	9.56769e-08	ID=OE9A031893T1;Parent=OE9A031893;Name=OE9A031893T1;product=OE9A031893P1
OE9A115091	574.096	-2.63282	0.415456	-6.33719	2.33994e-10	6.73842e-09	ID=OE9A115091T1;Parent=OE9A115091;Name=OE9A115091T1;product=OE9A115091P1
OE9A040030	65.2562	-2.63108	0.435704	-6.03869	1.55368e-09	3.90057e-08	ID=OE9A040030T1;Parent=OE9A040030;Name=OE9A040030T1;product=OE9A040030P1
OE9A013675	846.452	-2.62857	0.273915	-9.5963	8.28667e-22	1.0003e-19	ID=OE9A013675T1;Parent=OE9A013675;Name=OE9A013675T1;product=OE9A013675P1
OE9A074584	700.044	-2.62602	0.437052	-6.00848	1.87272e-09	4.60532e-08	ID=OE9A074584T1;Parent=OE9A074584;Name=OE9A074584T1;product=OE9A074584P1;md5=80898f0b29d86dc2f75bdf981763c236;INTERPRO=<table><tr><th>DB</th><th>ID</th><th>Description</th></tr><tr><td>Gene3D</td><td>G3DSA:1.50.30.10</td><td></td></tr><tr><td>PANTHER</td><td>PTHR31225</td><td></td></tr><tr><td>PANTHER</td><td>PTHR31225:SF5</td><td></td></tr><tr><td>Pfam</td><td>PF01397</td><td>Terpene synthase%2C…
OE9A047935	7.65892	-2.62555	0.697392	-3.76481	0.000166677	0.00144137	ID=OE9A047935T1;Parent=OE9A047935;Name=OE9A047935T1;product=OE9A047935P1;Description=glucuronosyltransferase PGSIP8;Ontology_term=GO:0016021
OE9A088051	39.4738	-2.62367	0.435215	-6.02844	1.65551e-09	4.12488e-08	ID=OE9A088051T1;Parent=OE9A088051;Name=OE9A088051T1;product=OE9A088051P1;Description=dehydration-responsive element-binding 3-like;Ontology_term=GO:0003677%2C GO:0003700%2C GO:0005634%2C GO:0005667%2C GO:0006355%2C GO:0045449
OE9A055292	18.9108	-2.62197	0.824599	-3.17969	0.00147431	0.00933308	ID=OE9A055292T1;Parent=OE9A055292;Name=OE9A055292T1;product=OE9A055292P1;Description=LRR receptor kinase BAK1;Ontology_term=GO:0004672%2C GO:0005524%2C GO:0006468%2C GO:0016020
OE9A099768	235.767	-2.62186	0.35561	-7.37285	1.67019e-13	7.65219e-12	ID=OE9A099768T1;Parent=OE9A099768;Name=OE9A099768T1;product=OE9A099768P1;Description=ethylene-responsive transcription factor TINY-like;Ontology_term=GO:0003677%2C GO:0003700%2C GO:0005667%2C GO:0006355%2C GO:0045449
OE9A023470	2057.63	-2.61826	0.289774	-9.03555	1.63178e-19	1.59179e-17	ID=OE9A023470T1;Parent=OE9A023470;Name=OE9A023470T1;product=OE9A023470P1;Description=probable CCR4-associated factor 1 homolog 9;Ontology_term=GO:0000289%2C GO:0003676%2C GO:0004535%2C GO:0005634%2C GO:0030014%2C GO:0051252%2C GO:0090503
OE9A074574	12.4469	-2.61753	0.719818	-3.63638	0.000276493	0.00222846	ID=OE9A074574T2;Parent=OE9A074574;Name=OE9A074574T2;product=OE9A074574P2;Description=leucine-rich repeat receptor kinase At2g19210;Ontology_term=GO:0004672%2C GO:0005524%2C GO:0006468
OE9A033938	15.0406	-2.61618	0.670466	-3.90203	9.5389e-05	0.000888236	ID=OE9A033938T1;Parent=OE9A033938;Name=OE9A033938T1;product=OE9A033938P1;md5=5027e2b7d9aa36896f938b202d295cf2;INTERPRO=<table><tr><th>DB</th><th>ID</th><th>Description</th></tr><tr><td>Gene3D</td><td>G3DSA:3.40.50.1110</td><td></td></tr><tr><td>PANTHER</td><td>PTHR22835</td><td></td></tr><tr><td>PANTHER</td><td>PTHR22835:SF184</td><td></td></tr><tr><td>Pfam</td><td>PF00657</td><td>GDSL-like Lipas…
OE9A063437	61.1585	-2.61415	0.493054	-5.30196	1.14563e-07	2.07154e-06	ID=OE9A063437T1;Parent=OE9A063437;Name=OE9A063437T1;product=OE9A063437P1
OE9A087887	6.96144	-2.60841	1.14369	-2.2807	0.0225663	0.0832954	ID=OE9A087887T1;Parent=OE9A087887;Name=OE9A087887T1;product=OE9A087887P1;Description=basic endochitinase-like;Ontology_term=GO:0004568%2C GO:0005975%2C GO:0006032%2C GO:0016998
OE9A064672	50.6106	-2.60676	0.492238	-5.29573	1.18544e-07	2.13331e-06	ID=OE9A064672T1;Parent=OE9A064672;Name=OE9A064672T1;product=OE9A064672P1;Description=C2-DOMAIN ABA-RELATED 4-like;Ontology_term=GO:0005515
OE9A040591	355.812	-2.60545	0.437817	-5.951	2.66515e-09	6.34167e-08	ID=OE9A040591T1;Parent=OE9A040591;Name=OE9A040591T1;product=OE9A040591P1;Description=dehydration-responsive element-binding 3-like;Ontology_term=GO:0003677%2C GO:0003700%2C GO:0005667%2C GO:0006355%2C GO:0045449
OE9A082285	34.3268	-2.60436	0.407047	-6.39817	1.57249e-10	4.64473e-09	ID=OE9A082285T1;Parent=OE9A082285;Name=OE9A082285T1;product=OE9A082285P1
OE9A099983	2113.49	-2.60057	0.313094	-8.30606	9.89316e-17	6.65485e-15	ID=OE9A099983T1;Parent=OE9A099983;Name=OE9A099983T1;product=OE9A099983P1;Description=ethylene-responsive transcription factor 5-like;Ontology_term=GO:0003677%2C GO:0003700%2C GO:0005667%2C GO:0006355%2C GO:0045449
OE9A049149	11.7804	-2.59847	0.904815	-2.87183	0.00408104	0.0215873	ID=OE9A049149T1;Parent=OE9A049149;Name=OE9A049149T1;product=OE9A049149P1;Description=sugar transport 8-like;Ontology_term=GO:0005351%2C GO:0005355%2C GO:0005887%2C GO:0015992%2C GO:0046323%2C GO:1904659
OE9A010857	125.636	-2.59809	0.298029	-8.71757	2.84229e-18	2.4006e-16	ID=OE9A010857T1;Parent=OE9A010857;Name=OE9A010857T1;product=OE9A010857P1
OE9A020210	227.722	-2.59442	1.13401	-2.28783	0.0221474	0.0820818	ID=OE9A020210T1;Parent=OE9A020210;Name=OE9A020210T1;product=OE9A020210P1;Description=E3 ubiquitin- ligase PUB23-like;Ontology_term=GO:0004842%2C GO:0005488%2C GO:0016567%2C GO:0016874
OE9A045533	7.12394	-2.58526	1.17912	-2.19252	0.0283417	0.0987014	ID=OE9A045533T1;Parent=OE9A045533;Name=OE9A045533T1;product=OE9A045533P1;Description=SAL1 phosphatase-like;Ontology_term=GO:0006790%2C GO:0008441%2C GO:0016311%2C GO:0046854
OE9A045980	31.3204	-2.58492	0.699774	-3.69393	0.000220814	0.00184089	ID=OE9A045980T1;Parent=OE9A045980;Name=OE9A045980T1;product=OE9A045980P1;Description=U-box domain-containing 27-like;Ontology_term=GO:0004842%2C GO:0005488%2C GO:0016567
OE9A093204	121.322	-2.58145	0.326231	-7.91296	2.51346e-15	1.43512e-13	ID=OE9A093204T1;Parent=OE9A093204;Name=OE9A093204T1;product=OE9A093204P1
OE9A011505	873.65	-2.57139	0.517423	-4.96961	6.70864e-07	1.04569e-05	ID=OE9A011505T1;Parent=OE9A011505;Name=OE9A011505T1;product=OE9A011505P1
OE9A053794	593.849	-2.571	0.258649	-9.9401	2.7855e-23	3.80263e-21	ID=OE9A053794T1;Parent=OE9A053794;Name=OE9A053794T1;product=OE9A053794P1
OE9A029686	6.90193	-2.5697	0.810282	-3.17136	0.00151726	0.00956144	ID=OE9A029686T1;Parent=OE9A029686;Name=OE9A029686T1;product=OE9A029686P1;Description=desiccation protectant Lea14 homolog;Ontology_term=GO:0009269
OE9A061628	7.37482	-2.56817	0.722426	-3.55492	0.000378088	0.00293112	ID=OE9A061628T1;Parent=OE9A061628;Name=OE9A061628T1;product=OE9A061628P1;Description=auxin-responsive IAA17-like;Ontology_term=GO:0005515%2C GO:0050794
OE9A083942	20.463	-2.56501	0.678977	-3.77776	0.000158246	0.00137657	ID=OE9A083942T1;Parent=OE9A083942;Name=OE9A083942T1;product=OE9A083942P1;Description=ALA-interacting subunit 1-like;Ontology_term=GO:0016021
OE9A074593	210.537	-2.55992	0.407037	-6.28915	3.1921e-10	9.01682e-09	ID=OE9A074593T1;Parent=OE9A074593;Name=OE9A074593T1;product=OE9A074593P1;Description=uncharacterized protein LOC111373047;Ontology_term=GO:0016021
OE9A006276	3565.85	-2.55729	0.359815	-7.10723	1.18395e-12	4.78577e-11	ID=OE9A006276T1;Parent=OE9A006276;Name=OE9A006276T1;product=OE9A006276P1;Description=calcium-binding CML42;Ontology_term=GO:0005509
OE9A000362	4.26319	-2.55203	0.981452	-2.60026	0.00931534	0.041835	ID=OE9A000362T1;Parent=OE9A000362;Name=OE9A000362T1;product=OE9A000362P1
OE9A052519	207.177	-2.54925	0.388444	-6.56273	5.28319e-11	1.69293e-09	ID=OE9A052519T1;Parent=OE9A052519;Name=OE9A052519T1;product=OE9A052519P1;Description=dehydration-responsive element-binding 3-like;Ontology_term=GO:0003677%2C GO:0003700%2C GO:0005667%2C GO:0006355%2C GO:0045449
OE9A089368	110.091	-2.5462	0.3527	-7.21917	5.23055e-13	2.23024e-11	ID=OE9A089368T1;Parent=OE9A089368;Name=OE9A089368T1;product=OE9A089368P1;Description=ninja-family AFP2-like;Ontology_term=GO:0007165
OE9A043571	9.9975	-2.54304	0.691295	-3.67866	0.000234465	0.00193456	ID=OE9A043571T1;Parent=OE9A043571;Name=OE9A043571T1;product=OE9A043571P1;Description=phosphoglycerate mutase at74;Ontology_term=GO:0005829%2C GO:0015976%2C GO:0016311%2C GO:0050278
OE9A109153	6819.88	-2.54266	0.252198	-10.082	6.63713e-24	9.91294e-22	ID=OE9A109153T1;Parent=OE9A109153;Name=OE9A109153T1;product=OE9A109153P1;Description=beta-amylase 1, chloroplastic;Ontology_term=GO:0005634%2C GO:0005829%2C GO:0005983%2C GO:0005985%2C GO:0016161
OE9A092611	7.64262	-2.54056	1.05521	-2.40763	0.0160562	0.0639058	ID=OE9A092611T1;Parent=OE9A092611;Name=OE9A092611T1;product=OE9A092611P1
OE9A040663	13.5493	-2.54048	0.852065	-2.98156	0.00286785	0.0162657	ID=OE9A040663T1;Parent=OE9A040663;Name=OE9A040663T1;product=OE9A040663P1
OE9A056979	306.622	-2.53842	0.44034	-5.76469	8.18093e-09	1.79181e-07	ID=OE9A056979T1;Parent=OE9A056979;Name=OE9A056979T1;product=OE9A056979P1;Description=serine threonine- kinase STY46;Ontology_term=GO:0004674%2C GO:0005524%2C GO:0006468%2C GO:0009069%2C GO:0009734%2C GO:0009742%2C GO:0010305
OE9A096392	80.7116	-2.53832	0.583118	-4.35301	1.34279e-05	0.000155624	ID=OE9A096392T1;Parent=OE9A096392;Name=OE9A096392T1;product=OE9A096392P1;md5=c0173038f1d98f563015a283ba9fefee;INTERPRO=<table><tr><th>DB</th><th>ID</th><th>Description</th></tr><tr><td>Gene3D</td><td>G3DSA:1.10.600.10</td><td></td></tr><tr><td>PANTHER</td><td>PTHR31225</td><td></td></tr><tr><td>PANTHER</td><td>PTHR31225:SF15</td><td></td></tr><tr><td>SUPERFAMILY</td><td>SSF48576</td><td></td></tr…
OE9A117718	293.381	-2.53807	0.38245	-6.63634	3.21576e-11	1.06132e-09	ID=OE9A117718T1;Parent=OE9A117718;Name=OE9A117718T1;product=OE9A117718P1;Description=poly polymerase;Ontology_term=GO:0005730
OE9A023580	3247.7	-2.53403	0.461967	-5.48531	4.12751e-08	8.10659e-07	ID=OE9A023580T1;Parent=OE9A023580;Name=OE9A023580T1;product=OE9A023580P1;Description=probable calcium-binding CML45;Ontology_term=GO:0005509
OE9A042020	393.741	-2.53061	0.344869	-7.33788	2.16997e-13	9.75599e-12	ID=OE9A042020T1;Parent=OE9A042020;Name=OE9A042020T1;product=OE9A042020P1;Description=Beta-1,4-mannosyl-glyco 4-beta-N-acetylglucosaminyltransferase;Ontology_term=GO:0003830%2C GO:0006487%2C GO:0016021
OE9A038031	134.281	-2.52563	0.282391	-8.94372	3.76291e-19	3.50268e-17	ID=OE9A038031T1;Parent=OE9A038031;Name=OE9A038031T1;product=OE9A038031P1;Description=ABC transporter G family member 25;Ontology_term=GO:0005524%2C GO:0005886%2C GO:0016021%2C GO:0042626%2C GO:0055085
OE9A079507	8.55571	-2.52197	0.789556	-3.19416	0.00140237	0.00894188	ID=OE9A079507T1;Parent=OE9A079507;Name=OE9A079507T1;product=OE9A079507P1;Description=probable glucan endo-1,3-beta-glucosidase A6;Ontology_term=GO:0004553%2C GO:0005975
OE9A078302	575.895	-2.51829	0.363464	-6.92858	4.25086e-12	1.59852e-10	ID=OE9A078302T1;Parent=OE9A078302;Name=OE9A078302T1;product=OE9A078302P1;Description=purple acid phosphatase 22-like;Ontology_term=GO:0003993%2C GO:0006771%2C GO:0016311%2C GO:0019497%2C GO:0046872
OE9A041718	446.846	-2.51764	0.316016	-7.9668	1.62832e-15	9.41934e-14	ID=OE9A041718T1;Parent=OE9A041718;Name=OE9A041718T1;product=OE9A041718P1;Description=Glyoxalase_2 domain-containing;Ontology_term=GO:0016829
OE9A002858	1580.37	-2.51494	0.383256	-6.56203	5.30807e-11	1.69884e-09	ID=OE9A002858T1;Parent=OE9A002858;Name=OE9A002858T1;product=OE9A002858P1;Description=UDP-glucose 6-dehydrogenase 2-like;Ontology_term=GO:0003979%2C GO:0005982%2C GO:0005985%2C GO:0009117%2C GO:0051287%2C GO:0055114
OE9A058932	48.2857	-2.51483	1.13164	-2.22228	0.0262644	0.0934489	ID=OE9A058932T1;Parent=OE9A058932;Name=OE9A058932T1;product=OE9A058932P1;Description=transcriptional corepressor LEUNIG-like;Ontology_term=GO:0005515
OE9A098891	153.948	-2.51205	0.42597	-5.89725	3.696e-09	8.59112e-08	ID=OE9A098891T1;Parent=OE9A098891;Name=OE9A098891T1;product=OE9A098891P1
OE9A082695	17.6575	-2.51023	0.69472	-3.6133	0.000302327	0.00241387	ID=OE9A082695T1;Parent=OE9A082695;Name=OE9A082695T1;product=OE9A082695P1;Description=RHOMBOID 2;Ontology_term=GO:0004252%2C GO:0016021%2C GO:0016485
OE9A028053	56.451	-2.50969	0.864497	-2.90306	0.00369536	0.0199572	ID=OE9A028053T1;Parent=OE9A028053;Name=OE9A028053T1;product=OE9A028053P1;Description=phospholipase A1-Igamma1, chloroplastic;Ontology_term=GO:0006629%2C GO:0016787
OE9A055930	241.263	-2.50902	0.376106	-6.67104	2.53991e-11	8.49937e-10	ID=OE9A055930T1;Parent=OE9A055930;Name=OE9A055930T1;product=OE9A055930P1;Description=UPF0098 CPn_0877 CP_0992 CPj0877 0906;Ontology_term=GO:0016021
OE9A009098	6.92068	-2.50366	0.873835	-2.86514	0.00416819	0.0219459	ID=OE9A009098T1;Parent=OE9A009098;Name=OE9A009098T1;product=OE9A009098P1;Description=dof zinc finger -like;Ontology_term=GO:0003677%2C GO:0006355
OE9A020062	61.8621	-2.49946	0.539145	-4.63598	3.55256e-06	4.73404e-05	ID=OE9A020062T1;Parent=OE9A020062;Name=OE9A020062T1;product=OE9A020062P1;Description=methanol O-anthraniloyltransferase;Ontology_term=GO:0016747
OE9A065734	1102.53	-2.49609	0.401813	-6.21206	5.22937e-10	1.41934e-08	ID=OE9A065734T1;Parent=OE9A065734;Name=OE9A065734T1;product=OE9A065734P1;Description=RING-H2 finger ATL3-like;Ontology_term=GO:0005515%2C GO:0008270%2C GO:0044267
OE9A104771	2946.37	-2.49514	0.191037	-13.061	5.49817e-39	2.64272e-36	ID=OE9A104771T1;Parent=OE9A104771;Name=OE9A104771T1;product=OE9A104771P1;Description=cyclic dof factor 1-like;Ontology_term=GO:0003677%2C GO:0006355
OE9A030636	4038.88	-2.49233	0.701428	-3.55322	0.000380541	0.00294755	ID=OE9A030636T1;Parent=OE9A030636;Name=OE9A030636T1;product=OE9A030636P1;Description=probable xyloglucan endotransglucosylase hydrolase 6;Ontology_term=GO:0004553%2C GO:0005618%2C GO:0010411%2C GO:0016762%2C GO:0042546%2C GO:0048046%2C GO:0071555
OE9A053469	4.229	-2.49163	0.899378	-2.77039	0.00559892	0.0277802	ID=OE9A053469T1;Parent=OE9A053469;Name=OE9A053469T1;product=OE9A053469P1;Description=translation factor SUI1 homolog;Ontology_term=GO:0003743%2C GO:0005840%2C GO:0006446
OE9A101726	182.465	-2.48622	0.60755	-4.09221	4.27284e-05	0.000432785	ID=OE9A101726T1;Parent=OE9A101726;Name=OE9A101726T1;product=OE9A101726P1;Description=F-box At1g78100;Ontology_term=GO:0005515
OE9A030651	711.88	-2.47917	0.338277	-7.32882	2.32187e-13	1.03509e-11	ID=OE9A030651T1;Parent=OE9A030651;Name=OE9A030651T1;product=OE9A030651P1
OE9A101836	6.24466	-2.47784	0.85801	-2.88789	0.0038784	0.020713	ID=OE9A101836T1;Parent=OE9A101836;Name=OE9A101836T1;product=OE9A101836P1;Description=uncharacterized protein LOC111384518;Ontology_term=GO:0016021
OE9A103168	774.066	-2.47511	0.720279	-3.43632	0.000589668	0.00426419	ID=OE9A103168T1;Parent=OE9A103168;Name=OE9A103168T1;product=OE9A103168P1;Description=heavy metal-associated isoprenylated plant 24-like;Ontology_term=GO:0005737%2C GO:0030001%2C GO:0046914%2C GO:0046916
OE9A029195	13.1322	-2.47505	0.66943	-3.69725	0.00021795	0.00182045	ID=OE9A029195T1;Parent=OE9A029195;Name=OE9A029195T1;product=OE9A029195P1;Description=galactinol synthase 2-like;Ontology_term=GO:0016757
OE9A057817	8.54648	-2.47225	0.745478	-3.31633	0.000912069	0.0062191	ID=OE9A057817T1;Parent=OE9A057817;Name=OE9A057817T1;product=OE9A057817P1;Description=transcription factor bHLH35 isoform X2;Ontology_term=GO:0016020%2C GO:0032440%2C GO:0046983%2C GO:0055114
OE9A106023	106.943	-2.47206	0.363306	-6.80435	1.01506e-11	3.63115e-10	ID=OE9A106023T1;Parent=OE9A106023;Name=OE9A106023T1;product=OE9A106023P1
OE9A020249	124.319	-2.46634	0.850393	-2.90023	0.00372887	0.0201053	ID=OE9A020249T1;Parent=OE9A020249;Name=OE9A020249T1;product=OE9A020249P1;Description=probable calcium-binding CML31;Ontology_term=GO:0005509
OE9A058331	3.3938	-2.46626	1.09621	-2.2498	0.0244619	0.0885976	ID=OE9A058331T1;Parent=OE9A058331;Name=OE9A058331T1;product=OE9A058331P1;Description=NRT1 PTR FAMILY -like;Ontology_term=GO:0005215%2C GO:0006810%2C GO:0016021
OE9A049433	15.9373	-2.46176	0.553664	-4.4463	8.73613e-06	0.00010633	ID=OE9A049433T1;Parent=OE9A049433;Name=OE9A049433T1;product=OE9A049433P1;Description=CSC1 RXW8;Ontology_term=GO:0016021
OE9A027777	1414.2	-2.45807	0.277634	-8.85364	8.47125e-19	7.66938e-17	ID=OE9A027777T1;Parent=OE9A027777;Name=OE9A027777T1;product=OE9A027777P1;Description=U-box domain-containing 17;Ontology_term=GO:0004842%2C GO:0005515%2C GO:0005634%2C GO:0005737%2C GO:0009814%2C GO:0016567
OE9A102632	115.62	-2.4563	0.378603	-6.4878	8.70966e-11	2.68668e-09	ID=OE9A102632T1;Parent=OE9A102632;Name=OE9A102632T1;product=OE9A102632P1;Description=CASP 5C1;Ontology_term=GO:0005886%2C GO:0016021
OE9A075065	2878	-2.45365	0.356191	-6.88857	5.63542e-12	2.08653e-10	ID=OE9A075065T1;Parent=OE9A075065;Name=OE9A075065T1;product=OE9A075065P1;Description=SRC2 homolog, partial;Ontology_term=GO:0005515
OE9A065931	104.384	-2.4534	0.448731	-5.46743	4.56618e-08	8.84982e-07	ID=OE9A065931T1;Parent=OE9A065931;Name=OE9A065931T1;product=OE9A065931P1;Description=Mediator of RNA polymerase II transcription subunit 18,;Ontology_term=GO:0016020
OE9A050090	248.65	-2.45233	0.355203	-6.90401	5.05533e-12	1.88761e-10	ID=OE9A050090T1;Parent=OE9A050090;Name=OE9A050090T1;product=OE9A050090P1;Description=UPF0098 CPn_0877 CP_0992 CPj0877 0906;Ontology_term=GO:0016021
OE9A095000	5.17766	-2.4499	0.965902	-2.53639	0.0112003	0.048302	ID=OE9A095000T1;Parent=OE9A095000;Name=OE9A095000T1;product=OE9A095000P1
OE9A106904	68.9116	-2.44943	0.613434	-3.99299	6.52461e-05	0.000633902	ID=OE9A106904T1;Parent=OE9A106904;Name=OE9A106904T1;product=OE9A106904P1;Description=non-symbiotic hemoglobin 2;Ontology_term=GO:0006631%2C GO:0019432%2C GO:0019825%2C GO:0020037%2C GO:0046872
OE9A013311	10.6087	-2.44317	1.0252	-2.38312	0.0171668	0.0673927	ID=OE9A013311T1;Parent=OE9A013311;Name=OE9A013311T1;product=OE9A013311P1;Description=probable 9-cis-epoxycarotenoid dioxygenase NCED5, chloroplastic;Ontology_term=GO:0016702%2C GO:0055114
OE9A103776	363.96	-2.44271	0.217337	-11.2393	2.61516e-29	6.11808e-27	ID=OE9A103776T1;Parent=OE9A103776;Name=OE9A103776T1;product=OE9A103776P1;Description=malonyl-coenzyme:anthocyanin 5-O-glucoside-6 -O-malonyltransferase-like;Ontology_term=GO:0016747
OE9A010223	295.742	-2.44226	0.463283	-5.27164	1.35209e-07	2.41186e-06	ID=OE9A010223T1;Parent=OE9A010223;Name=OE9A010223T1;product=OE9A010223P1
OE9A084465	6.23346	-2.44037	0.59377	-4.10996	3.95731e-05	0.000405486	ID=OE9A084465T1;Parent=OE9A084465;Name=OE9A084465T1;product=OE9A084465P1;Description=F-box kelch-repeat At1g67480-like;Ontology_term=GO:0004842%2C GO:0005515%2C GO:0016567%2C GO:0031463
OE9A095728	6.35497	-2.43916	0.90912	-2.683	0.00729659	0.0344308	ID=OE9A095728T1;Parent=OE9A095728;Name=OE9A095728T1;product=OE9A095728P1;Description=uncharacterized protein LOC111371543 isoform X1;Ontology_term=GO:0016021
OE9A076981	379.386	-2.43644	0.242919	-10.0299	1.12676e-23	1.6457e-21	ID=OE9A076981T1;Parent=OE9A076981;Name=OE9A076981T1;product=OE9A076981P1;Description=fasciclin-like arabinogalactan 1;Ontology_term=GO:0016021
OE9A082355	5783.98	-2.43407	0.252968	-9.62207	6.45205e-22	7.86021e-20	ID=OE9A082355T1;Parent=OE9A082355;Name=OE9A082355T1;product=OE9A082355P1;Description=beta-amylase 1, chloroplastic;Ontology_term=GO:0005634%2C GO:0005829%2C GO:0005983%2C GO:0005985%2C GO:0016161
OE9A100009	72.5816	-2.43293	0.434895	-5.59428	2.21541e-08	4.52601e-07	ID=OE9A100009T1;Parent=OE9A100009;Name=OE9A100009T1;product=OE9A100009P1;Description=exocyst complex component EXO70A1-like;Ontology_term=GO:0000145%2C GO:0006887
OE9A046927	250.613	-2.43172	0.280714	-8.66264	4.60957e-18	3.77271e-16	ID=OE9A046927T1;Parent=OE9A046927;Name=OE9A046927T1;product=OE9A046927P1;Description=uncharacterized protein LOC111372080;Ontology_term=GO:0009535%2C GO:0016021
OE9A059352	866.767	-2.42888	0.343115	-7.07891	1.45296e-12	5.79345e-11	ID=OE9A059352T1;Parent=OE9A059352;Name=OE9A059352T1;product=OE9A059352P1;Description=probable E3 ubiquitin- ligase XERICO;Ontology_term=GO:0005515%2C GO:0008270
OE9A059222	8.48993	-2.42289	0.654766	-3.70039	0.000215271	0.00179978	ID=OE9A059222T1;Parent=OE9A059222;Name=OE9A059222T1;product=OE9A059222P1;Description=aspartyl protease family 2;Ontology_term=GO:0004190%2C GO:0006508%2C GO:0030163
OE9A098762	799.934	-2.41814	0.302108	-8.00422	1.20225e-15	7.03159e-14	ID=OE9A098762T1;Parent=OE9A098762;Name=OE9A098762T1;product=OE9A098762P1;Description=probable CCR4-associated factor 1 homolog 11;Ontology_term=GO:0000289%2C GO:0003676%2C GO:0004535%2C GO:0005634%2C GO:0016740%2C GO:0030014%2C GO:0051252%2C GO:0090503
OE9A076822	111.583	-2.4155	0.299433	-8.06691	7.20997e-16	4.30255e-14	ID=OE9A076822T1;Parent=OE9A076822;Name=OE9A076822T1;product=OE9A076822P1;Description=post-GPI attachment to s factor 3;Ontology_term=GO:0016021
OE9A081767	219.687	-2.41535	0.412321	-5.85795	4.68622e-09	1.06752e-07	ID=OE9A081767T1;Parent=OE9A081767;Name=OE9A081767T1;product=OE9A081767P1;Description=Beta-1,4-mannosyl-glyco 4-beta-N-acetylglucosaminyltransferase;Ontology_term=GO:0003830%2C GO:0006487%2C GO:0016021
OE9A102435	15.5801	-2.4137	0.875707	-2.75629	0.00584616	0.0287748	ID=OE9A102435T1;Parent=OE9A102435;Name=OE9A102435T1;product=OE9A102435P1
OE9A036625	451.384	-2.41267	0.20433	-11.8077	3.56207e-32	1.01255e-29	ID=OE9A036625T1;Parent=OE9A036625;Name=OE9A036625T1;product=OE9A036625P1
OE9A102863	4.76515	-2.40936	1.04687	-2.30149	0.021364	0.0796469	ID=OE9A102863T1;Parent=OE9A102863;Name=OE9A102863T1;product=OE9A102863P1
OE9A096369	49.7592	-2.40791	0.345434	-6.97067	3.15445e-12	1.20507e-10	ID=OE9A096369T1;Parent=OE9A096369;Name=OE9A096369T1;product=OE9A096369P1
OE9A054842	42.292	-2.40765	0.385927	-6.23861	4.41467e-10	1.21823e-08	ID=OE9A054842T1;Parent=OE9A054842;Name=OE9A054842T1;product=OE9A054842P1
OE9A070143	179.051	-2.40048	0.370458	-6.47977	9.18645e-11	2.83045e-09	ID=OE9A070143T1;Parent=OE9A070143;Name=OE9A070143T1;product=OE9A070143P1;Description=fatty acid desaturase 4, chloroplastic-like;Ontology_term=GO:0005737%2C GO:0031625%2C GO:0061630
OE9A087924	287.773	-2.39869	0.310864	-7.71621	1.19837e-14	6.32337e-13	ID=OE9A087924T1;Parent=OE9A087924;Name=OE9A087924T1;product=OE9A087924P1;Description=methanol O-anthraniloyltransferase;Ontology_term=GO:0016747
OE9A039332	489.982	-2.39833	0.255915	-9.3716	7.14384e-21	8.03636e-19	ID=OE9A039332T1;Parent=OE9A039332;Name=OE9A039332T1;product=OE9A039332P1;Description=uncharacterized protein LOC111372080;Ontology_term=GO:0009507%2C GO:0016020
OE9A008801	1045.16	-2.39785	0.312744	-7.66712	1.75899e-14	9.02924e-13	ID=OE9A008801T1;Parent=OE9A008801;Name=OE9A008801T1;product=OE9A008801P1;Description=E3 ubiquitin- ligase RING1-like;Ontology_term=GO:0005515%2C GO:0008270
OE9A087360	1173.17	-2.39576	0.337759	-7.0931	1.31145e-12	5.26093e-11	ID=OE9A087360T1;Parent=OE9A087360;Name=OE9A087360T1;product=OE9A087360P1;Description=glucan endo-1,3-beta-glucosidase-like;Ontology_term=GO:0004553%2C GO:0005975
OE9A051537	79.1072	-2.39442	0.37808	-6.33311	2.40271e-10	6.90414e-09	ID=OE9A051537T1;Parent=OE9A051537;Name=OE9A051537T1;product=OE9A051537P1;Description=calcium-binding CML42;Ontology_term=GO:0005509
OE9A080162	5.15285	-2.39072	0.825708	-2.89536	0.0037873	0.0203498	ID=OE9A080162T1;Parent=OE9A080162;Name=OE9A080162T1;product=OE9A080162P1
OE9A057231	14.633	-2.38706	0.812786	-2.93689	0.00331524	0.0182283	ID=OE9A057231T1;Parent=OE9A057231;Name=OE9A057231T1;product=OE9A057231P1;Description=MLP 28;Ontology_term=GO:0006952%2C GO:0009607
OE9A049687	373.555	-2.38291	0.328349	-7.25726	3.95009e-13	1.72034e-11	ID=OE9A049687T1;Parent=OE9A049687;Name=OE9A049687T1;product=OE9A049687P1
OE9A057599	82.728	-2.37953	0.384431	-6.18975	6.02613e-10	1.62227e-08	ID=OE9A057599T1;Parent=OE9A057599;Name=OE9A057599T1;product=OE9A057599P1;Description=calcium-binding CML42;Ontology_term=GO:0005509
OE9A072034	124.75	-2.37662	0.370015	-6.42304	1.33577e-10	3.99915e-09	ID=OE9A072034T1;Parent=OE9A072034;Name=OE9A072034T1;product=OE9A072034P1;Description=U-box domain-containing 17;Ontology_term=GO:0004842%2C GO:0005634%2C GO:0005737%2C GO:0009814%2C GO:0016567
OE9A061630	23.232	-2.37259	0.692478	-3.42623	0.000612011	0.00440248	ID=OE9A061630T1;Parent=OE9A061630;Name=OE9A061630T1;product=OE9A061630P1;Description=NIM1-INTERACTING 1-like;Ontology_term=GO:0010112
OE9A043750	221.285	-2.37162	0.329982	-7.18712	6.61709e-13	2.77262e-11	ID=OE9A043750T1;Parent=OE9A043750;Name=OE9A043750T1;product=OE9A043750P1;Description=transcription factor MYB44-like;Ontology_term=GO:0003677
OE9A091063	31.4333	-2.37066	0.828028	-2.86302	0.00419629	0.0220587	ID=OE9A091063T1;Parent=OE9A091063;Name=OE9A091063T1;product=OE9A091063P1;Description=Mediator of RNA polymerase II transcription subunit 18,;Ontology_term=GO:0016020
OE9A033104	18.2932	-2.36864	0.562403	-4.21164	2.53527e-05	0.000274232	ID=OE9A033104T1;Parent=OE9A033104;Name=OE9A033104T1;product=OE9A033104P1
OE9A048019	4.26549	-2.36783	0.852253	-2.77831	0.00546419	0.0272277	ID=OE9A048019T1;Parent=OE9A048019;Name=OE9A048019T1;product=OE9A048019P1;Description=ankyrin repeat-containing ITN1-like isoform X1;Ontology_term=GO:0005515
OE9A099612	48.5441	-2.36665	0.705424	-3.35493	0.000793859	0.0055126	ID=OE9A099612T1;Parent=OE9A099612;Name=OE9A099612T1;product=OE9A099612P1
OE9A105546	96.5217	-2.36655	0.341781	-6.92418	4.38498e-12	1.64195e-10	ID=OE9A105546T1;Parent=OE9A105546;Name=OE9A105546T1;product=OE9A105546P1;Description=probable calcium-binding CML18;Ontology_term=GO:0005509
OE9A093966	270.46	-2.36652	0.274038	-8.63575	5.83455e-18	4.64585e-16	ID=OE9A093966T1;Parent=OE9A093966;Name=OE9A093966T1;product=OE9A093966P1
OE9A089778	491.133	-2.35974	0.334735	-7.04957	1.79475e-12	7.0604e-11	ID=OE9A089778T1;Parent=OE9A089778;Name=OE9A089778T1;product=OE9A089778P1;Description=GATA transcription factor 5-like;Ontology_term=GO:0003700%2C GO:0005634%2C GO:0005667%2C GO:0008270%2C GO:0043565%2C GO:0045449%2C GO:0045893
OE9A038526	365.227	-2.35932	0.40414	-5.83789	5.28655e-09	1.19143e-07	ID=OE9A038526T1;Parent=OE9A038526;Name=OE9A038526T1;product=OE9A038526P1
OE9A072934	15.3328	-2.35877	0.713298	-3.30685	0.000943519	0.00640217	ID=OE9A072934T1;Parent=OE9A072934;Name=OE9A072934T1;product=OE9A072934P1;Description=zinc finger ZAT10-like;Ontology_term=GO:0003676%2C GO:0046872
OE9A079404	144.915	-2.35688	0.549374	-4.29012	1.7858e-05	0.000200848	ID=OE9A079404T1;Parent=OE9A079404;Name=OE9A079404T1;product=OE9A079404P1;Description=mitogen-activated kinase kinase kinase 3-like;Ontology_term=GO:0004672%2C GO:0005524%2C GO:0006468
OE9A000336	944.324	-2.35186	0.298688	-7.87395	3.43615e-15	1.93685e-13	ID=OE9A000336T1;Parent=OE9A000336;Name=OE9A000336T1;product=OE9A000336P1;Description=PHLOEM PROTEIN 2-LIKE A10;Ontology_term=GO:0016021
OE9A107203	509.373	-2.3515	0.553233	-4.25047	2.13319e-05	0.000235757	ID=OE9A107203T1;Parent=OE9A107203;Name=OE9A107203T1;product=OE9A107203P1
OE9A058655	4224.07	-2.34823	0.421663	-5.56897	2.56256e-08	5.19507e-07	ID=OE9A058655T1;Parent=OE9A058655;Name=OE9A058655T1;product=OE9A058655P1;Description=probable calcium-binding CML45;Ontology_term=GO:0005509
OE9A060964	348.156	-2.3463	0.319945	-7.33345	2.243e-13	1.00162e-11	ID=OE9A060964T1;Parent=OE9A060964;Name=OE9A060964T1;product=OE9A060964P1
OE9A048266	8.58876	-2.34625	0.802477	-2.92376	0.00345835	0.0188661	ID=OE9A048266T1;Parent=OE9A048266;Name=OE9A048266T1;product=OE9A048266P1;Description=U-box domain-containing 26-like;Ontology_term=GO:0004842%2C GO:0005488%2C GO:0016567
OE9A060414	211.612	-2.3455	0.395755	-5.92664	3.09195e-09	7.27852e-08	ID=OE9A060414T1;Parent=OE9A060414;Name=OE9A060414T1;product=OE9A060414P1
OE9A067990	121.461	-2.34543	0.381883	-6.14176	8.16126e-10	2.15967e-08	ID=OE9A067990T1;Parent=OE9A067990;Name=OE9A067990T1;product=OE9A067990P1;Description=uncharacterized protein LOC111404955;Ontology_term=GO:0016021
OE9A034722	26.3994	-2.34274	0.809787	-2.89303	0.0038154	0.0204509	ID=OE9A034722T1;Parent=OE9A034722;Name=OE9A034722T1;product=OE9A034722P1
OE9A089496	131.825	-2.33858	0.289222	-8.08574	6.17856e-16	3.72914e-14	ID=OE9A089496T1;Parent=OE9A089496;Name=OE9A089496T1;product=OE9A089496P1
OE9A008777	2868.84	-2.33698	0.402855	-5.80104	6.59049e-09	1.4604e-07	ID=OE9A008777T1;Parent=OE9A008777;Name=OE9A008777T1;product=OE9A008777P1;Description=heavy metal-associated isoprenylated plant 3-like;Ontology_term=GO:0030001%2C GO:0046872
OE9A113687	19.8691	-2.33654	0.788632	-2.96277	0.00304882	0.0170723	ID=OE9A113687T1;Parent=OE9A113687;Name=OE9A113687T1;product=OE9A113687P1
OE9A087913	274.304	-2.33652	0.222475	-10.5024	8.42393e-26	1.51493e-23	ID=OE9A087913T1;Parent=OE9A087913;Name=OE9A087913T1;product=OE9A087913P1;Description=zinc finger 1;Ontology_term=GO:0046872
OE9A099095	6.84608	-2.33558	0.736956	-3.16923	0.00152842	0.00962261	ID=OE9A099095T1;Parent=OE9A099095;Name=OE9A099095T1;product=OE9A099095P1
OE9A054971	18.993	-2.33301	0.661573	-3.52646	0.00042116	0.00320673	ID=OE9A054971T1;Parent=OE9A054971;Name=OE9A054971T1;product=OE9A054971P1;Description=NIM1-INTERACTING 1-like;Ontology_term=GO:0010112
OE9A041636	856.486	-2.33209	0.295338	-7.89632	2.87252e-15	1.62608e-13	ID=OE9A041636T1;Parent=OE9A041636;Name=OE9A041636T1;product=OE9A041636P1;Description=U-box domain-containing 17;Ontology_term=GO:0004842%2C GO:0005515%2C GO:0005634%2C GO:0005737%2C GO:0009814%2C GO:0016567%2C GO:0016874
OE9A032354	3353.25	-2.32837	0.400235	-5.81752	5.9726e-09	1.33693e-07	ID=OE9A032354T1;Parent=OE9A032354;Name=OE9A032354T1;product=OE9A032354P1;Description=heavy metal-associated isoprenylated plant 3-like;Ontology_term=GO:0030001%2C GO:0046872
OE9A068726	1003.07	-2.32672	0.338268	-6.87832	6.0563e-12	2.23609e-10	ID=OE9A068726T1;Parent=OE9A068726;Name=OE9A068726T1;product=OE9A068726P1
OE9A052595	5.56944	-2.32348	0.983934	-2.36142	0.018205	0.070536	ID=OE9A052595T1;Parent=OE9A052595;Name=OE9A052595T1;product=OE9A052595P1;Description=zinc finger ZAT5-like;Ontology_term=GO:0046872
OE9A101290	148.976	-2.32291	0.424651	-5.47016	4.49635e-08	8.74655e-07	ID=OE9A101290T1;Parent=OE9A101290;Name=OE9A101290T1;product=OE9A101290P1;Description=high mobility group B 1-like;Ontology_term=GO:0005982%2C GO:0005985%2C GO:0006011%2C GO:0016020%2C GO:0016760%2C GO:0030244
OE9A110021	653.916	-2.32265	0.178115	-13.0402	7.22692e-39	3.35177e-36	ID=OE9A110021T1;Parent=OE9A110021;Name=OE9A110021T1;product=OE9A110021P1
OE9A064160	76.3529	-2.32218	0.337015	-6.89044	5.56201e-12	2.06513e-10	ID=OE9A064160T1;Parent=OE9A064160;Name=OE9A064160T1;product=OE9A064160P1;Description=disease resistance RPP13-like;Ontology_term=GO:0043531
OE9A093993	724.176	-2.32185	0.249024	-9.3238	1.12245e-20	1.24155e-18	ID=OE9A093993T1;Parent=OE9A093993;Name=OE9A093993T1;product=OE9A093993P1;Description=uncharacterized protein At1g01500-like;Ontology_term=GO:0005829%2C GO:0006090%2C GO:0006544%2C GO:0006563%2C GO:0006566%2C GO:0016020%2C GO:0016618%2C GO:0030267%2C GO:0046487
OE9A001491	114.761	-2.32064	0.372318	-6.23296	4.57694e-10	1.25906e-08	ID=OE9A001491T2;Parent=OE9A001491;Name=OE9A001491T2;product=OE9A001491P2;Description=vesicle-associated 2-1;Ontology_term=GO:0005789%2C GO:0005886%2C GO:0016021
OE9A085809	697.271	-2.31689	0.182111	-12.7224	4.44004e-37	1.8058e-34	ID=OE9A085809T1;Parent=OE9A085809;Name=OE9A085809T1;product=OE9A085809P1;Description=cyclic dof factor 2-like;Ontology_term=GO:0003677%2C GO:0006355
OE9A112539	284.923	-2.31438	0.377783	-6.12622	8.99941e-10	2.36725e-08	ID=OE9A112539T1;Parent=OE9A112539;Name=OE9A112539T1;product=OE9A112539P1
OE9A028377	635.782	-2.3098	0.255415	-9.04331	1.51997e-19	1.49014e-17	ID=OE9A028377T1;Parent=OE9A028377;Name=OE9A028377T1;product=OE9A028377P1
OE9A027764	2224.13	-2.30754	0.295215	-7.81649	5.43161e-15	2.99771e-13	ID=OE9A027764T1;Parent=OE9A027764;Name=OE9A027764T1;product=OE9A027764P1;Description=ferredoxin;Ontology_term=GO:0006118%2C GO:0009055%2C GO:0022900%2C GO:0046872%2C GO:0051537
OE9A080338	442.593	-2.30746	0.389518	-5.92389	3.14422e-09	7.38851e-08	ID=OE9A080338T1;Parent=OE9A080338;Name=OE9A080338T1;product=OE9A080338P1
OE9A096427	53.3889	-2.30736	0.562906	-4.09902	4.14904e-05	0.000422349	ID=OE9A096427T1;Parent=OE9A096427;Name=OE9A096427T1;product=OE9A096427P1;md5=9ea8f2825d633890141bf64a5789fed6;INTERPRO=<table><tr><th>DB</th><th>ID</th><th>Description</th></tr><tr><td>Gene3D</td><td>G3DSA:2.60.120.330</td><td></td></tr><tr><td>PANTHER</td><td>PTHR10209</td><td></td></tr><tr><td>PANTHER</td><td>PTHR10209:SF135</td><td></td></tr><tr><td>Pfam</td><td>PF03171</td><td>2OG-Fe(II) oxyg…
OE9A100773	151.994	-2.30438	0.258554	-8.91256	4.98664e-19	4.56148e-17	ID=OE9A100773T1;Parent=OE9A100773;Name=OE9A100773T1;product=OE9A100773P1;Description=squamosa promoter-binding 1-like;Ontology_term=GO:0003677%2C GO:0005634%2C GO:0048580%2C GO:0090567
OE9A065125	1252.99	-2.30046	0.273043	-8.42525	3.5997e-17	2.57236e-15	ID=OE9A065125T1;Parent=OE9A065125;Name=OE9A065125T1;product=OE9A065125P1
OE9A083464	65.1984	-2.29921	0.369545	-6.22173	4.91705e-10	1.34284e-08	ID=OE9A083464T1;Parent=OE9A083464;Name=OE9A083464T1;product=OE9A083464P1
OE9A110262	56.8235	-2.29586	0.287636	-7.98182	1.44195e-15	8.39636e-14	ID=OE9A110262T1;Parent=OE9A110262;Name=OE9A110262T1;product=OE9A110262P1;Description=transcription factor bHLH149-like;Ontology_term=GO:0046983
OE9A005724	512.901	-2.28969	0.413185	-5.54158	2.99757e-08	5.99424e-07	ID=OE9A005724T1;Parent=OE9A005724;Name=OE9A005724T1;product=OE9A005724P1;Description=sulfate transporter -like;Ontology_term=GO:0008271%2C GO:0009507%2C GO:0016021%2C GO:1902358
OE9A044817	200.079	-2.28874	0.223183	-10.255	1.12386e-24	1.80063e-22	ID=OE9A044817T1;Parent=OE9A044817;Name=OE9A044817T1;product=OE9A044817P1
OE9A103755	1408.08	-2.28616	0.331855	-6.88904	5.61714e-12	2.08268e-10	ID=OE9A103755T1;Parent=OE9A103755;Name=OE9A103755T1;product=OE9A103755P1;Description=ethylene-responsive transcription factor 5-like;Ontology_term=GO:0003677%2C GO:0003700%2C GO:0005667%2C GO:0006355%2C GO:0045449
OE9A089822	963.191	-2.28388	0.237286	-9.625	6.27099e-22	7.67499e-20	ID=OE9A089822T1;Parent=OE9A089822;Name=OE9A089822T1;product=OE9A089822P1;Description=probable esterase KAI2;Ontology_term=GO:0010223%2C GO:0016787%2C GO:1901601
OE9A107056	893.954	-2.28022	0.383735	-5.94217	2.81281e-09	6.66303e-08	ID=OE9A107056T1;Parent=OE9A107056;Name=OE9A107056T1;product=OE9A107056P1
OE9A116451	83.1873	-2.27403	0.943254	-2.41083	0.0159161	0.0634629	ID=OE9A116451T1;Parent=OE9A116451;Name=OE9A116451T1;product=OE9A116451P1
OE9A008310	4.36632	-2.27078	1.00359	-2.26266	0.0236566	0.0863079	ID=OE9A008310T1;Parent=OE9A008310;Name=OE9A008310T1;product=OE9A008310P1
OE9A112705	6.82433	-2.27005	0.654122	-3.47038	0.000519718	0.00381117	ID=OE9A112705T1;Parent=OE9A112705;Name=OE9A112705T1;product=OE9A112705P1;Description=PIN-LIKES 7;Ontology_term=GO:0016021%2C GO:0055085
OE9A100057	4558.55	-2.26896	0.166133	-13.6575	1.8211e-42	1.23443e-39	ID=OE9A100057T1;Parent=OE9A100057;Name=OE9A100057T1;product=OE9A100057P1;Description=CBL-interacting serine threonine- kinase 14-like;Ontology_term=GO:0004674%2C GO:0005524%2C GO:0006468%2C GO:0007165%2C GO:0009069
OE9A058962	41.1923	-2.26682	0.516209	-4.39128	1.12687e-05	0.000133407	ID=OE9A058962T1;Parent=OE9A058962;Name=OE9A058962T1;product=OE9A058962P1
OE9A103265	1489.28	-2.26454	0.334067	-6.7787	1.21266e-11	4.28009e-10	ID=OE9A103265T1;Parent=OE9A103265;Name=OE9A103265T1;product=OE9A103265P1;Description=probable calcium-binding CML45;Ontology_term=GO:0005509
OE9A096590	6905.84	-2.2626	0.269135	-8.40695	4.20814e-17	2.96657e-15	ID=OE9A096590T1;Parent=OE9A096590;Name=OE9A096590T1;product=OE9A096590P1;Description=oleosin S1-2;Ontology_term=GO:0012511%2C GO:0016021
OE9A060030	7.94487	-2.2623	0.800238	-2.82704	0.00469808	0.0240695	ID=OE9A060030T1;Parent=OE9A060030;Name=OE9A060030T1;product=OE9A060030P1;Description=scarecrow 4;Ontology_term=GO:0003700%2C GO:0005634%2C GO:0005667%2C GO:0006355%2C GO:0043565%2C GO:0045449
OE9A004162	148.906	-2.25949	0.617711	-3.65784	0.000254351	0.00207061	ID=OE9A004162T2;Parent=OE9A004162;Name=OE9A004162T2;product=OE9A004162P1;Description=probable WRKY transcription factor 23;Ontology_term=GO:0003700%2C GO:0005667%2C GO:0006355%2C GO:0043565%2C GO:0045449
OE9A106212	774.938	-2.25807	0.562406	-4.01501	5.94423e-05	0.000582006	ID=OE9A106212T1;Parent=OE9A106212;Name=OE9A106212T1;product=OE9A106212P1;Description=universal stress A;Ontology_term=GO:0006950
OE9A110132	656.295	-2.25355	0.325821	-6.91651	4.62893e-12	1.73084e-10	ID=OE9A110132T1;Parent=OE9A110132;Name=OE9A110132T1;product=OE9A110132P1;Description=PHLOEM PROTEIN 2-LIKE A10;Ontology_term=GO:0016021
OE9A004622	14.7985	-2.24793	0.890685	-2.52382	0.0116087	0.0496915	ID=OE9A004622T1;Parent=OE9A004622;Name=OE9A004622T1;product=OE9A004622P1;Description=ribulose-phosphate 3-epimerase, chloroplastic;Ontology_term=GO:0004750%2C GO:0005975%2C GO:0006098%2C GO:0015976%2C GO:0046872
OE9A077596	554.278	-2.24473	0.325181	-6.903	5.09147e-12	1.89575e-10	ID=OE9A077596T1;Parent=OE9A077596;Name=OE9A077596T1;product=OE9A077596P1;Description=probable CCR4-associated factor 1 homolog 11;Ontology_term=GO:0000289%2C GO:0003676%2C GO:0004535%2C GO:0005634%2C GO:0016740%2C GO:0030014%2C GO:0051252%2C GO:0090503
OE9A107469	9.98957	-2.23969	0.7621	-2.93884	0.00329438	0.0181438	ID=OE9A107469T1;Parent=OE9A107469;Name=OE9A107469T1;product=OE9A107469P1;Description=F-box PP2-B10-like;Ontology_term=GO:0005515
OE9A056440	80.2273	-2.23704	0.363495	-6.15425	7.54344e-10	2.00622e-08	ID=OE9A056440T1;Parent=OE9A056440;Name=OE9A056440T1;product=OE9A056440P1
OE9A103651	50.9156	-2.23333	0.485088	-4.60397	4.14518e-06	5.41146e-05	ID=OE9A103651T1;Parent=OE9A103651;Name=OE9A103651T1;product=OE9A103651P1
OE9A071260	98.7599	-2.23168	0.359261	-6.21186	5.23605e-10	1.41969e-08	ID=OE9A071260T1;Parent=OE9A071260;Name=OE9A071260T1;product=OE9A071260P1;Description=mitogen-activated kinase kinase kinase NPK1-like;Ontology_term=GO:0004672%2C GO:0005524%2C GO:0006468
OE9A043612	359.721	-2.23115	0.790168	-2.82364	0.00474815	0.0242837	ID=OE9A043612T1;Parent=OE9A043612;Name=OE9A043612T1;product=OE9A043612P1;Description=cytochrome P450 94C1-like;Ontology_term=GO:0004497%2C GO:0005506%2C GO:0016021%2C GO:0016705%2C GO:0020037%2C GO:0055114
OE9A027391	659.53	-2.23051	0.164023	-13.5988	4.07309e-42	2.62625e-39	ID=OE9A027391T1;Parent=OE9A027391;Name=OE9A027391T1;product=OE9A027391P1;Description=B-box zinc finger 19-like isoform X1;Ontology_term=GO:0005622%2C GO:0008270
OE9A108895	77.0214	-2.23015	0.25369	-8.79084	1.4844e-18	1.28661e-16	ID=OE9A108895T1;Parent=OE9A108895;Name=OE9A108895T1;product=OE9A108895P1;Description=uncharacterized protein LOC105160485;Ontology_term=GO:0031072%2C GO:0051082
OE9A052930	4.33291	-2.23013	0.864518	-2.57962	0.00989089	0.0438129	ID=OE9A052930T1;Parent=OE9A052930;Name=OE9A052930T1;product=OE9A052930P1;Description=VAN3-binding isoform X1;Ontology_term=GO:0005886
OE9A119978	7549.43	-2.22866	0.347994	-6.40431	1.51048e-10	4.47155e-09	ID=OE9A119978T1;Parent=OE9A119978;Name=OE9A119978T1;product=OE9A119978P1;Description=ethylene-responsive transcription factor 5-like;Ontology_term=GO:0003677%2C GO:0003700%2C GO:0005667%2C GO:0006355%2C GO:0045449
OE9A099889	80.9798	-2.22832	0.230893	-9.65088	4.87353e-22	6.02041e-20	ID=OE9A099889T1;Parent=OE9A099889;Name=OE9A099889T1;product=OE9A099889P1;Description=squamosa promoter-binding 1-like;Ontology_term=GO:0003677%2C GO:0005634%2C GO:0048580%2C GO:0090567
OE9A101371	927.588	-2.22753	0.314237	-7.08868	1.35393e-12	5.41491e-11	ID=OE9A101371T1;Parent=OE9A101371;Name=OE9A101371T1;product=OE9A101371P1;Description=RING-H2 finger ATL2-like;Ontology_term=GO:0005515%2C GO:0008270
OE9A011767	9.40939	-2.2273	0.855051	-2.60487	0.00919085	0.0414058	ID=OE9A011767T1;Parent=OE9A011767;Name=OE9A011767T1;product=OE9A011767P1;Description=zinc finger CONSTANS-LIKE 4-like;Ontology_term=GO:0005622%2C GO:0008270
OE9A101051	185.364	-2.22379	0.607886	-3.65824	0.000253957	0.00206827	ID=OE9A101051T1;Parent=OE9A101051;Name=OE9A101051T1;product=OE9A101051P1
OE9A058749	128.978	-2.22366	0.292341	-7.60638	2.81888e-14	1.42213e-12	ID=OE9A058749T1;Parent=OE9A058749;Name=OE9A058749T1;product=OE9A058749P1
OE9A117660	35.083	-2.22156	0.740274	-3.001	0.00269092	0.0154311	ID=OE9A117660T1;Parent=OE9A117660;Name=OE9A117660T1;product=OE9A117660P1;Description=xyloglucan endotransglucosylase hydrolase 2-like;Ontology_term=GO:0004553%2C GO:0005618%2C GO:0010411%2C GO:0016762%2C GO:0042546%2C GO:0048046
OE9A055113	8.0828	-2.21667	0.961096	-2.3064	0.0210883	0.0788863	ID=OE9A055113T1;Parent=OE9A055113;Name=OE9A055113T1;product=OE9A055113P1
OE9A065394	340.484	-2.21592	0.221975	-9.98274	1.81379e-23	2.5505e-21	ID=OE9A065394T1;Parent=OE9A065394;Name=OE9A065394T1;product=OE9A065394P1;Description=malonyl-coenzyme:anthocyanin 5-O-glucoside-6 -O-malonyltransferase-like;Ontology_term=GO:0016747
OE9A082439	19.5573	-2.21509	0.45918	-4.82401	1.40702e-06	2.04711e-05	ID=OE9A082439T1;Parent=OE9A082439;Name=OE9A082439T1;product=OE9A082439P1;Description=transcription factor bHLH13-like;Ontology_term=GO:0046983
OE9A022848	525.88	-2.21376	0.21634	-10.2328	1.41375e-24	2.25144e-22	ID=OE9A022848T1;Parent=OE9A022848;Name=OE9A022848T1;product=OE9A022848P1;Description=B-box zinc finger 19-like isoform X1;Ontology_term=GO:0005622%2C GO:0008270
OE9A074259	26.0255	-2.21106	0.538309	-4.10742	4.00109e-05	0.000409496	ID=OE9A074259T1;Parent=OE9A074259;Name=OE9A074259T1;product=OE9A074259P1;Description=uncharacterized protein LOC111405665;Ontology_term=GO:0016021
OE9A009565	13.1129	-2.21093	0.494776	-4.46855	7.87517e-06	9.68767e-05	ID=OE9A009565T1;Parent=OE9A009565;Name=OE9A009565T1;product=OE9A009565P1
OE9A016234	7318.46	-2.21051	0.270337	-8.17689	2.91275e-16	1.8118e-14	ID=OE9A016234T1;Parent=OE9A016234;Name=OE9A016234T1;product=OE9A016234P1;Description=plastocyanin, chloroplastic;Ontology_term=GO:0005507%2C GO:0006118%2C GO:0009055%2C GO:0009535%2C GO:0055114
OE9A016697	513.413	-2.20977	0.262377	-8.42209	3.69815e-17	2.62807e-15	ID=OE9A016697T1;Parent=OE9A016697;Name=OE9A016697T1;product=OE9A016697P1
OE9A062338	5.57765	-2.201	0.737975	-2.98249	0.00285917	0.01622	ID=OE9A062338T1;Parent=OE9A062338;Name=OE9A062338T1;product=OE9A062338P1
OE9A043760	492.689	-2.20099	0.292624	-7.52156	5.41272e-14	2.63519e-12	ID=OE9A043760T1;Parent=OE9A043760;Name=OE9A043760T1;product=OE9A043760P1;Description=zinc finger A20 and AN1 domain-containing stress-associated 4-like;Ontology_term=GO:0003677%2C GO:0008270
OE9A099773	53.6673	-2.19816	0.361456	-6.08141	1.19128e-09	3.0635e-08	ID=OE9A099773T1;Parent=OE9A099773;Name=OE9A099773T1;product=OE9A099773P1
OE9A031971	6.39147	-2.19713	0.810305	-2.71148	0.00669831	0.0321314	ID=OE9A031971T1;Parent=OE9A031971;Name=OE9A031971T1;product=OE9A031971P1;Description=guanylate kinase 2-like;Ontology_term=GO:0004385%2C GO:0006144%2C GO:0046037%2C GO:0046710
OE9A003300	61.5338	-2.18697	0.974182	-2.24493	0.0247728	0.0894051	ID=OE9A003300T1;Parent=OE9A003300;Name=OE9A003300T1;product=OE9A003300P1
OE9A076672	127.96	-2.18642	0.346833	-6.30396	2.9013e-10	8.24717e-09	ID=OE9A076672T1;Parent=OE9A076672;Name=OE9A076672T1;product=OE9A076672P1
OE9A102409	22.5229	-2.18546	0.599929	-3.64286	0.000269624	0.00217908	ID=OE9A102409T1;Parent=OE9A102409;Name=OE9A102409T1;product=OE9A102409P1
OE9A082403	198.601	-2.18455	0.39236	-5.56772	2.58099e-08	5.22844e-07	ID=OE9A082403T1;Parent=OE9A082403;Name=OE9A082403T1;product=OE9A082403P1;Description=galactinol synthase 2-like;Ontology_term=GO:0005737%2C GO:0006012%2C GO:0046872%2C GO:0047216
OE9A059693	22.2771	-2.18127	0.691926	-3.15247	0.00161898	0.0100871	ID=OE9A059693T1;Parent=OE9A059693;Name=OE9A059693T1;product=OE9A059693P1;Description=outer envelope pore 16-2, chloroplastic;Ontology_term=GO:0005744%2C GO:0015266%2C GO:0030150%2C GO:0031305
OE9A026457	13.7784	-2.17942	0.762229	-2.85927	0.00424611	0.0222634	ID=OE9A026457T1;Parent=OE9A026457;Name=OE9A026457T1;product=OE9A026457P1
OE9A038702	766.302	-2.17908	0.146598	-14.8643	5.62263e-50	4.95466e-47	ID=OE9A038702T1;Parent=OE9A038702;Name=OE9A038702T1;product=OE9A038702P1;Description=zinc finger CCCH domain-containing 30-like;Ontology_term=GO:0005515%2C GO:0046872
OE9A089783	57.6806	-2.17686	0.36544	-5.95682	2.57197e-09	6.14207e-08	ID=OE9A089783T1;Parent=OE9A089783;Name=OE9A089783T1;product=OE9A089783P1
OE9A055756	21.3438	-2.17685	0.674418	-3.22774	0.00124772	0.00811431	ID=OE9A055756T1;Parent=OE9A055756;Name=OE9A055756T1;product=OE9A055756P1;Description=gibberellin 3-beta-dioxygenase 1-like;Ontology_term=GO:0005506%2C GO:0051213%2C GO:0055114
OE9A068715	14.9897	-2.1748	0.764377	-2.84519	0.00443844	0.0230339	ID=OE9A068715T1;Parent=OE9A068715;Name=OE9A068715T1;product=OE9A068715P1;Description=receptor 12;Ontology_term=GO:0005515
OE9A117565	12.8444	-2.1712	0.622428	-3.48828	0.000486143	0.00361121	ID=OE9A117565T1;Parent=OE9A117565;Name=OE9A117565T1;product=OE9A117565P1;Description=RING-H2 finger ATL57-like;Ontology_term=GO:0005515%2C GO:0008270%2C GO:0016021
OE9A101914	49.1711	-2.1701	0.508026	-4.27162	1.94055e-05	0.000216549	ID=OE9A101914T1;Parent=OE9A101914;Name=OE9A101914T1;product=OE9A101914P1
OE9A077547	22.3345	-2.16972	0.642525	-3.37686	0.000733174	0.00515483	ID=OE9A077547T1;Parent=OE9A077547;Name=OE9A077547T1;product=OE9A077547P1;Description=ankyrin repeat-containing ITN1-like;Ontology_term=GO:0005515%2C GO:0016020
OE9A021431	8401.68	-2.16312	0.338725	-6.38607	1.70199e-10	4.99376e-09	ID=OE9A021431T1;Parent=OE9A021431;Name=OE9A021431T1;product=OE9A021431P1;Description=zinc finger CCCH domain-containing 29-like;Ontology_term=GO:0005515%2C GO:0046872
OE9A075468	494.196	-2.16243	0.200532	-10.7835	4.1211e-27	8.07002e-25	ID=OE9A075468T1;Parent=OE9A075468;Name=OE9A075468T1;product=OE9A075468P1;Description=probable receptor kinase At1g30570;Ontology_term=GO:0004674%2C GO:0005524%2C GO:0005886%2C GO:0006468%2C GO:0009069%2C GO:0009741%2C GO:0009826%2C GO:0016021
OE9A017838	108.865	-2.1602	0.376901	-5.73148	9.95568e-09	2.15905e-07	ID=OE9A017838T1;Parent=OE9A017838;Name=OE9A017838T1;product=OE9A017838P1
OE9A033893	13.8859	-2.16003	0.693809	-3.11329	0.00185013	0.0112644	ID=OE9A033893T1;Parent=OE9A033893;Name=OE9A033893T1;product=OE9A033893P1
OE9A068212	384.928	-2.15595	0.198023	-10.8874	1.3239e-27	2.71307e-25	ID=OE9A068212T1;Parent=OE9A068212;Name=OE9A068212T1;product=OE9A068212P1;Description=Acyl- N-acyltransferases (NAT) superfamily;Ontology_term=GO:0004596%2C GO:0006474%2C GO:0016020%2C GO:0031248%2C GO:0042967
OE9A089730	1440.36	-2.1556	0.1709	-12.6133	1.78442e-36	6.83667e-34	ID=OE9A089730T1;Parent=OE9A089730;Name=OE9A089730T1;product=OE9A089730P1;Description=transcription factor MYB1R1;Ontology_term=GO:0003677%2C GO:0005634%2C GO:0006325%2C GO:0006355
OE9A065276	20.2407	-2.15449	0.922015	-2.33672	0.0194539	0.0742006	ID=OE9A065276T1;Parent=OE9A065276;Name=OE9A065276T1;product=OE9A065276P1;md5=81bac2ab6db63a0b255bd05429b062ff;INTERPRO=<table><tr><th>DB</th><th>ID</th><th>Description</th></tr><tr><td>PANTHER</td><td>PTHR23155</td><td></td></tr><tr><td>PANTHER</td><td>PTHR23155:SF634</td><td></td></tr><tr><td>Pfam</td><td>PF00931</td><td>NB-ARC domain</td></tr><tr><td>SUPERFAMILY</td><td>SSF52058</td><td></td></…
OE9A106532	163.514	-2.15162	0.326463	-6.59069	4.37795e-11	1.42007e-09	ID=OE9A106532T1;Parent=OE9A106532;Name=OE9A106532T1;product=OE9A106532P1;Description=ABC transporter G family member 25;Ontology_term=GO:0005524%2C GO:0016021%2C GO:0016887
OE9A037314	441.304	-2.1515	0.549498	-3.9154	9.02528e-05	0.000845173	ID=OE9A037314T1;Parent=OE9A037314;Name=OE9A037314T1;product=OE9A037314P1;Description=mitogen-activated kinase kinase kinase NPK1-like;Ontology_term=GO:0004672%2C GO:0005524%2C GO:0006468
OE9A033910	115.429	-2.15018	0.405632	-5.30081	1.15291e-07	2.08328e-06	ID=OE9A033910T1;Parent=OE9A033910;Name=OE9A033910T1;product=OE9A033910P1;Description=xyloglucan endotransglucosylase hydrolase 24-like;Ontology_term=GO:0004553%2C GO:0005618%2C GO:0006073%2C GO:0016762%2C GO:0048046%2C GO:0071554%2C GO:0071840
OE9A011988	541.205	-2.14901	0.252428	-8.51333	1.69006e-17	1.27289e-15	ID=OE9A011988T1;Parent=OE9A011988;Name=OE9A011988T1;product=OE9A011988P1;Description=probable aminotransferase ACS10 isoform X1;Ontology_term=GO:0003824%2C GO:0009058%2C GO:0016021%2C GO:0030170
OE9A105354	10.6268	-2.14885	0.614145	-3.49894	0.00046712	0.00349527	ID=OE9A105354T1;Parent=OE9A105354;Name=OE9A105354T1;product=OE9A105354P1
OE9A046856	103.313	-2.14684	0.32363	-6.63362	3.27546e-11	1.07699e-09	ID=OE9A046856T1;Parent=OE9A046856;Name=OE9A046856T1;product=OE9A046856P1;Description=ethylene-responsive transcription factor 12;Ontology_term=GO:0003677%2C GO:0003700%2C GO:0005667%2C GO:0006355%2C GO:0045449
OE9A071497	474.949	-2.146	0.365875	-5.86539	4.48089e-09	1.02607e-07	ID=OE9A071497T1;Parent=OE9A071497;Name=OE9A071497T1;product=OE9A071497P1
OE9A028039	284.683	-2.14586	0.410052	-5.23314	1.66655e-07	2.89849e-06	ID=OE9A028039T1;Parent=OE9A028039;Name=OE9A028039T1;product=OE9A028039P1;Description=transcription factor MYB8-like;Ontology_term=GO:0003677
OE9A021548	7467.48	-2.14578	0.275413	-7.79114	6.64091e-15	3.59017e-13	ID=OE9A021548T1;Parent=OE9A021548;Name=OE9A021548T1;product=OE9A021548P1;Description=plastocyanin, chloroplastic;Ontology_term=GO:0005507%2C GO:0006118%2C GO:0009055%2C GO:0009535%2C GO:0055114
OE9A119931	699.632	-2.14286	0.276265	-7.75654	8.72766e-15	4.67054e-13	ID=OE9A119931T1;Parent=OE9A119931;Name=OE9A119931T1;product=OE9A119931P1;Description=SRC2-like;Ontology_term=GO:0005515
OE9A065849	273.839	-2.14226	0.358488	-5.97583	2.28916e-09	5.52659e-08	ID=OE9A065849T1;Parent=OE9A065849;Name=OE9A065849T1;product=OE9A065849P1
OE9A108355	247.653	-2.14043	0.236045	-9.0679	1.21336e-19	1.20136e-17	ID=OE9A108355T1;Parent=OE9A108355;Name=OE9A108355T1;product=OE9A108355P1;Description=2-keto-3-deoxy-L-rhamnonate aldolase-like;Ontology_term=GO:0005737%2C GO:0005975%2C GO:0016832
OE9A121716	2211.58	-2.13807	0.219542	-9.73878	2.06018e-22	2.63105e-20	ID=OE9A121716T1;Parent=OE9A121716;Name=OE9A121716T1;product=OE9A121716P1;Description=vegetative incompatibility HET-E-1-like;Ontology_term=GO:0005515
OE9A110943	178.085	-2.13668	0.643079	-3.32258	0.000891882	0.00610191	ID=OE9A110943T1;Parent=OE9A110943;Name=OE9A110943T1;product=OE9A110943P1;md5=a56ca71f62a968d2cd24d750cec7593b;INTERPRO=<table><tr><th>DB</th><th>ID</th><th>Description</th></tr><tr><td>Coils</td><td>Coil</td><td></td></tr><tr><td>Gene3D</td><td>G3DSA:1.10.600.10</td><td></td></tr><tr><td>Gene3D</td><td>G3DSA:1.50.30.10</td><td></td></tr><tr><td>PANTHER</td><td>PTHR31225</td><td></td></tr><tr><td>…
OE9A119601	80.2527	-2.13586	0.440662	-4.84694	1.25383e-06	1.84044e-05	ID=OE9A119601T1;Parent=OE9A119601;Name=OE9A119601T1;product=OE9A119601P1
OE9A093081	78.1415	-2.13069	0.341044	-6.24755	4.16933e-10	1.15656e-08	ID=OE9A093081T1;Parent=OE9A093081;Name=OE9A093081T1;product=OE9A093081P1;Description=F-box At1g61340-like;Ontology_term=GO:0005515
OE9A101649	613.07	-2.12959	0.276852	-7.69215	1.44678e-14	7.54133e-13	ID=OE9A101649T1;Parent=OE9A101649;Name=OE9A101649T1;product=OE9A101649P1;Description=probable phosphatase 2C 24;Ontology_term=GO:0004721%2C GO:0006470%2C GO:0043169
OE9A056360	186.11	-2.1285	0.213009	-9.99254	1.6432e-23	2.33546e-21	ID=OE9A056360T1;Parent=OE9A056360;Name=OE9A056360T1;product=OE9A056360P1
OE9A066840	12.3299	-2.12558	0.792253	-2.68296	0.00729747	0.0344308	ID=OE9A066840T1;Parent=OE9A066840;Name=OE9A066840T1;product=OE9A066840P1
OE9A120487	804.553	-2.12478	0.415386	-5.1152	3.13411e-07	5.18157e-06	ID=OE9A120487T1;Parent=OE9A120487;Name=OE9A120487T1;product=OE9A120487P1;Description=syntaxin-121-like;Ontology_term=GO:0000149%2C GO:0005484%2C GO:0005886%2C GO:0006886%2C GO:0006887%2C GO:0006906%2C GO:0012505%2C GO:0016021%2C GO:0031201%2C GO:0048278
OE9A054942	3397.49	-2.12432	0.178221	-11.9195	9.36212e-33	2.81247e-30	ID=OE9A054942T1;Parent=OE9A054942;Name=OE9A054942T1;product=OE9A054942P1;Description=magnesium-chelatase subunit , chloroplastic;Ontology_term=GO:0005739%2C GO:0010007%2C GO:0015995%2C GO:0016851
OE9A084147	44.9987	-2.12233	0.449155	-4.72517	2.29921e-06	3.18529e-05	ID=OE9A084147T1;Parent=OE9A084147;Name=OE9A084147T1;product=OE9A084147P1
OE9A042937	7457.72	-2.11799	0.34824	-6.08197	1.18718e-09	3.05592e-08	ID=OE9A042937T1;Parent=OE9A042937;Name=OE9A042937T1;product=OE9A042937P1;Description=zinc finger CCCH domain-containing 29-like;Ontology_term=GO:0005515%2C GO:0046872
OE9A012920	4.95359	-2.11661	0.691443	-3.06114	0.00220494	0.0130461	ID=OE9A012920T1;Parent=OE9A012920;Name=OE9A012920T1;product=OE9A012920P1;Description=uncharacterized protein LOC111401528;Ontology_term=GO:0004805%2C GO:0005982%2C GO:0005985%2C GO:0005992%2C GO:0016311
OE9A088962	13.4713	-2.11583	0.967516	-2.18687	0.028752	0.0997492	ID=OE9A088962T1;Parent=OE9A088962;Name=OE9A088962T1;product=OE9A088962P1
OE9A092718	9.66207	-2.11102	0.890368	-2.37095	0.0177424	0.0691594	ID=OE9A092718T1;Parent=OE9A092718;Name=OE9A092718T1;product=OE9A092718P1;Description=ethylene-responsive transcription factor ESR2;Ontology_term=GO:0003677%2C GO:0003700%2C GO:0005634%2C GO:0005667%2C GO:0006355%2C GO:0045449
OE9A092342	98.8095	-2.11008	0.239288	-8.81815	1.16362e-18	1.03226e-16	ID=OE9A092342T1;Parent=OE9A092342;Name=OE9A092342T1;product=OE9A092342P1
OE9A061662	21.2478	-2.10833	0.780636	-2.70079	0.0069176	0.0329918	ID=OE9A061662T1;Parent=OE9A061662;Name=OE9A061662T1;product=OE9A061662P1;Description=probable 2-oxoglutarate-dependent dioxygenase At5g05600;Ontology_term=GO:0005506%2C GO:0051213%2C GO:0055114
OE9A014059	6.83527	-2.10555	0.601624	-3.49977	0.000465656	0.00348826	ID=OE9A014059T1;Parent=OE9A014059;Name=OE9A014059T1;product=OE9A014059P1;Description=ankyrin repeat-containing At5g02620-like;Ontology_term=GO:0005515
OE9A073762	10.6454	-2.10406	0.700814	-3.00231	0.00267942	0.0153751	ID=OE9A073762T1;Parent=OE9A073762;Name=OE9A073762T1;product=OE9A073762P1;Description=ethylene-responsive transcription factor ERF118-like;Ontology_term=GO:0003677%2C GO:0003700%2C GO:0005667%2C GO:0006355%2C GO:0045449
OE9A019561	400.132	-2.10287	0.369739	-5.68745	1.28954e-08	2.74037e-07	ID=OE9A019561T1;Parent=OE9A019561;Name=OE9A019561T1;product=OE9A019561P1
OE9A075333	5.07314	-2.10256	0.609605	-3.44904	0.000562573	0.00408352	ID=OE9A075333T1;Parent=OE9A075333;Name=OE9A075333T1;product=OE9A075333P1;Description=transcription factor MYB48 isoform X2;Ontology_term=GO:0003677
OE9A056425	5.34562	-2.10131	0.698962	-3.00633	0.00264422	0.0152048	ID=OE9A056425T1;Parent=OE9A056425;Name=OE9A056425T1;product=OE9A056425P1;Description=probable phosphatase 2C 34 isoform X1;Ontology_term=GO:0004722%2C GO:0006470%2C GO:0008287
OE9A052054	1416.38	-2.10005	0.329048	-6.38219	1.74571e-10	5.10595e-09	ID=OE9A052054T1;Parent=OE9A052054;Name=OE9A052054T1;product=OE9A052054P1;Description=zinc finger a20 and an1 domain-containing stress-associated 1;Ontology_term=GO:0003677%2C GO:0008270
OE9A119631	46.5541	-2.09849	0.377908	-5.55291	2.80954e-08	5.64385e-07	ID=OE9A119631T1;Parent=OE9A119631;Name=OE9A119631T1;product=OE9A119631P1;Description=DUF604 domain-containing;Ontology_term=GO:0016020
OE9A084922	53.9556	-2.09829	0.354831	-5.91349	3.34931e-09	7.82176e-08	ID=OE9A084922T1;Parent=OE9A084922;Name=OE9A084922T1;product=OE9A084922P1;Description=dof zinc finger -like;Ontology_term=GO:0003677%2C GO:0006355
OE9A036345	1176.67	-2.09771	0.495768	-4.23124	2.3241e-05	0.000253989	ID=OE9A036345T1;Parent=OE9A036345;Name=OE9A036345T1;product=OE9A036345P1;Description=universal stress A;Ontology_term=GO:0006950
OE9A049330	206.96	-2.09681	0.392133	-5.34719	8.93281e-08	1.65254e-06	ID=OE9A049330T1;Parent=OE9A049330;Name=OE9A049330T1;product=OE9A049330P1
OE9A063073	97.4803	-2.09642	0.32105	-6.52988	6.58218e-11	2.08142e-09	ID=OE9A063073T1;Parent=OE9A063073;Name=OE9A063073T1;product=OE9A063073P1;Description=receptor-like cytosolic serine threonine- kinase RBK2 isoform X1;Ontology_term=GO:0004674%2C GO:0005524%2C GO:0006468%2C GO:0009069
OE9A116930	34.7988	-2.09342	0.638189	-3.28025	0.00103715	0.00694656	ID=OE9A116930T1;Parent=OE9A116930;Name=OE9A116930T1;product=OE9A116930P1;Description=dof zinc finger -like;Ontology_term=GO:0003677%2C GO:0006355
OE9A010508	12.6341	-2.0903	0.655256	-3.19005	0.00142246	0.00904598	ID=OE9A010508T1;Parent=OE9A010508;Name=OE9A010508T1;product=OE9A010508P1;Description=auxin efflux carrier component 7-like;Ontology_term=GO:0009734%2C GO:0016021%2C GO:0055085
OE9A087429	4.1105	-2.08829	0.796857	-2.62066	0.00877599	0.0399476	ID=OE9A087429T1;Parent=OE9A087429;Name=OE9A087429T1;product=OE9A087429P1
OE9A023040	142.592	-2.08602	0.61798	-3.37554	0.000736707	0.00517417	ID=OE9A023040T1;Parent=OE9A023040;Name=OE9A023040T1;product=OE9A023040P1;Description=Mediator of RNA polymerase II transcription subunit 18,;Ontology_term=GO:0016021
OE9A060701	121.126	-2.08565	0.443326	-4.70455	2.54428e-06	3.48321e-05	ID=OE9A060701T1;Parent=OE9A060701;Name=OE9A060701T1;product=OE9A060701P1;Description=Spindle pole body;Ontology_term=GO:0015031
OE9A018213	448.024	-2.08518	0.226751	-9.19586	3.71997e-20	3.96537e-18	ID=OE9A018213T1;Parent=OE9A018213;Name=OE9A018213T1;product=OE9A018213P1;Description=nudix hydrolase 2-like isoform X1;Ontology_term=GO:0016787
OE9A046498	297.056	-2.07991	0.308733	-6.73693	1.61768e-11	5.5902e-10	ID=OE9A046498T1;Parent=OE9A046498;Name=OE9A046498T1;product=OE9A046498P1;Description=L-type lectin-domain containing receptor kinase -like;Ontology_term=GO:0004674%2C GO:0005524%2C GO:0006468%2C GO:0009069%2C GO:0016021%2C GO:0030246
OE9A114961	27.0721	-2.0795	0.550568	-3.77701	0.000158725	0.00137983	ID=OE9A114961T1;Parent=OE9A114961;Name=OE9A114961T1;product=OE9A114961P1;Description=inositol 1,3,4-trisphosphate 5 6-kinase 4-like isoform X1;Ontology_term=GO:0000287%2C GO:0005524%2C GO:0005622%2C GO:0032957%2C GO:0047325%2C GO:0052725%2C GO:0052726
OE9A110944	204.868	-2.07923	0.284766	-7.30153	2.84523e-13	1.2557e-11	ID=OE9A110944T1;Parent=OE9A110944;Name=OE9A110944T1;product=OE9A110944P1
OE9A074030	1850.56	-2.07898	0.207871	-10.0013	1.50363e-23	2.15919e-21	ID=OE9A074030T1;Parent=OE9A074030;Name=OE9A074030T1;product=OE9A074030P1
OE9A045236	9172.25	-2.07895	0.270393	-7.68863	1.48723e-14	7.69401e-13	ID=OE9A045236T1;Parent=OE9A045236;Name=OE9A045236T1;product=OE9A045236P1;Description=plastocyanin, chloroplastic;Ontology_term=GO:0005507%2C GO:0006118%2C GO:0009055%2C GO:0009535%2C GO:0055114
OE9A047542	5484.99	-2.07665	0.362817	-5.7237	1.0423e-08	2.25301e-07	ID=OE9A047542T1;Parent=OE9A047542;Name=OE9A047542T1;product=OE9A047542P1;Description=xyloglucan endotransglycosylase hydrolase;Ontology_term=GO:0004553%2C GO:0005618%2C GO:0010411%2C GO:0016762%2C GO:0042546%2C GO:0048046%2C GO:0071555
OE9A007230	161.11	-2.07654	0.533749	-3.89049	0.000100042	0.000926991	ID=OE9A007230T1;Parent=OE9A007230;Name=OE9A007230T1;product=OE9A007230P1;Description=AP2 ERF and B3 domain-containing transcription factor RAV1;Ontology_term=GO:0003677%2C GO:0003700%2C GO:0005634%2C GO:0005667%2C GO:0006355%2C GO:0045449
OE9A034352	9.63956	-2.07403	0.613806	-3.37896	0.000727608	0.00512388	ID=OE9A034352T1;Parent=OE9A034352;Name=OE9A034352T1;product=OE9A034352P1;Description=galactan beta-1,4-galactosyltransferase GALS3-like;Ontology_term=GO:0016020
OE9A036327	9.9015	-2.07382	0.629688	-3.29341	0.00098979	0.00666313	ID=OE9A036327T1;Parent=OE9A036327;Name=OE9A036327T1;product=OE9A036327P1
OE9A031179	20.9835	-2.0703	0.527205	-3.92693	8.60376e-05	0.000811159	ID=OE9A031179T1;Parent=OE9A031179;Name=OE9A031179T1;product=OE9A031179P1;Description=receptor kinase THESEUS 1;Ontology_term=GO:0004674%2C GO:0005524%2C GO:0006468%2C GO:0009069%2C GO:0016021
OE9A058915	8.58825	-2.06716	0.674952	-3.06268	0.00219363	0.0129908	ID=OE9A058915T1;Parent=OE9A058915;Name=OE9A058915T1;product=OE9A058915P1;Description=NIM1-INTERACTING 2;Ontology_term=GO:0010112
OE9A094017	487.818	-2.06213	0.191543	-10.7659	4.98647e-27	9.62207e-25	ID=OE9A094017T1;Parent=OE9A094017;Name=OE9A094017T1;product=OE9A094017P1
OE9A070238	39.4966	-2.05885	0.401452	-5.12851	2.92044e-07	4.8587e-06	ID=OE9A070238T1;Parent=OE9A070238;Name=OE9A070238T1;product=OE9A070238P1;Description=vegetative incompatibility HET-E-1-like;Ontology_term=GO:0005515
OE9A044457	473.876	-2.0558	0.188366	-10.9139	9.89439e-28	2.0435e-25	ID=OE9A044457T1;Parent=OE9A044457;Name=OE9A044457T1;product=OE9A044457P1;Description=dof zinc finger -like;Ontology_term=GO:0003677%2C GO:0006355
OE9A024652	69.5503	-2.05421	0.359441	-5.71501	1.09696e-08	2.35957e-07	ID=OE9A024652T1;Parent=OE9A024652;Name=OE9A024652T1;product=OE9A024652P1;Description=lysine-tRNA ligase;Ontology_term=GO:0007623%2C GO:0009507
OE9A071261	241.351	-2.05411	0.395609	-5.19227	2.07746e-07	3.55468e-06	ID=OE9A071261T1;Parent=OE9A071261;Name=OE9A071261T1;product=OE9A071261P1;Description=U-box domain-containing 19-like;Ontology_term=GO:0004842%2C GO:0005515%2C GO:0005634%2C GO:0005737%2C GO:0016567
OE9A003889	1417.66	-2.05377	0.246219	-8.34126	7.35053e-17	5.04723e-15	ID=OE9A003889T1;Parent=OE9A003889;Name=OE9A003889T1;product=OE9A003889P1;Description=L-galactono-1,4-lactone dehydrogenase, mitochondrial;Ontology_term=GO:0003885%2C GO:0005739%2C GO:0009536%2C GO:0016021%2C GO:0016633%2C GO:0019852%2C GO:0050660%2C GO:0055114%2C GO:0080049
OE9A096553	915.732	-2.0517	0.303084	-6.76942	1.29297e-11	4.55747e-10	ID=OE9A096553T1;Parent=OE9A096553;Name=OE9A096553T1;product=OE9A096553P1;Description=myb-related 306-like;Ontology_term=GO:0003677
OE9A121458	236.338	-2.05114	0.29976	-6.84259	7.77753e-12	2.83596e-10	ID=OE9A121458T1;Parent=OE9A121458;Name=OE9A121458T1;product=OE9A121458P1;Description=U-box domain-containing 16;Ontology_term=GO:0004842%2C GO:0005515%2C GO:0005634%2C GO:0005737%2C GO:0016567
OE9A094722	1492.39	-2.05073	0.180411	-11.367	6.10792e-30	1.50906e-27	ID=OE9A094722T1;Parent=OE9A094722;Name=OE9A094722T1;product=OE9A094722P1;Description=nuclear transcription factor Y subunit B-3-like;Ontology_term=GO:0005634%2C GO:0006355%2C GO:0043565%2C GO:0046982
OE9A119150	106.308	-2.04931	0.286675	-7.14855	8.77003e-13	3.61692e-11	ID=OE9A119150T1;Parent=OE9A119150;Name=OE9A119150T1;product=OE9A119150P1
OE9A050550	368.295	-2.04894	0.359482	-5.69971	1.20015e-08	2.55864e-07	ID=OE9A050550T1;Parent=OE9A050550;Name=OE9A050550T1;product=OE9A050550P1;Description=beta-1,4-mannosyl-glyco 4-beta-N-acetylglucosaminyltransferase-like;Ontology_term=GO:0003830%2C GO:0006487%2C GO:0016021
OE9A003437	22.6751	-2.04557	0.583213	-3.50742	0.000452476	0.00341469	ID=OE9A003437T1;Parent=OE9A003437;Name=OE9A003437T1;product=OE9A003437P1;Description=uncharacterized protein LOC105167880;Ontology_term=GO:0016021
OE9A083857	6.39055	-2.04489	0.79039	-2.58719	0.00967609	0.0430562	ID=OE9A083857T1;Parent=OE9A083857;Name=OE9A083857T1;product=OE9A083857P1
OE9A085648	561.889	-2.04444	0.378685	-5.39877	6.70979e-08	1.2661e-06	ID=OE9A085648T1;Parent=OE9A085648;Name=OE9A085648T1;product=OE9A085648P1;Description=zinc finger A20 and AN1 domain-containing stress-associated 4-like;Ontology_term=GO:0003677%2C GO:0008270
OE9A080356	22.8692	-2.03491	0.695515	-2.92577	0.0034361	0.0187602	ID=OE9A080356T1;Parent=OE9A080356;Name=OE9A080356T1;product=OE9A080356P1;Description=probable WRKY transcription factor 40;Ontology_term=GO:0003700%2C GO:0005667%2C GO:0006355%2C GO:0043565%2C GO:0045449
OE9A015716	91.1854	-2.03412	0.41427	-4.91012	9.10212e-07	1.37342e-05	ID=OE9A015716T1;Parent=OE9A015716;Name=OE9A015716T1;product=OE9A015716P1;Description=NAC domain-containing 90;Ontology_term=GO:0003677%2C GO:0005634%2C GO:0006355
OE9A098587	47.872	-2.03247	0.246557	-8.2434	1.6739e-16	1.08725e-14	ID=OE9A098587T1;Parent=OE9A098587;Name=OE9A098587T1;product=OE9A098587P1;Description=NRT1 PTR FAMILY -like;Ontology_term=GO:0005215%2C GO:0006810%2C GO:0016021
OE9A048799	18.4263	-2.03225	0.639887	-3.17596	0.00149343	0.00942702	ID=OE9A048799T1;Parent=OE9A048799;Name=OE9A048799T1;product=OE9A048799P1
OE9A044788	631.411	-2.02954	0.230536	-8.80358	1.32524e-18	1.15244e-16	ID=OE9A044788T1;Parent=OE9A044788;Name=OE9A044788T1;product=OE9A044788P1;Description=uncharacterized protein LOC111398996;Ontology_term=GO:0009507%2C GO:0009579
OE9A106589	195.279	-2.02885	0.413074	-4.9116	9.03353e-07	1.36541e-05	ID=OE9A106589T1;Parent=OE9A106589;Name=OE9A106589T1;product=OE9A106589P1
OE9A100443	577.869	-2.02723	0.184762	-10.9721	5.20359e-28	1.13688e-25	ID=OE9A100443T1;Parent=OE9A100443;Name=OE9A100443T1;product=OE9A100443P1
OE9A056427	43.5704	-2.02598	0.423738	-4.78121	1.74245e-06	2.48588e-05	ID=OE9A056427T1;Parent=OE9A056427;Name=OE9A056427T1;product=OE9A056427P1
OE9A104718	54.0027	-2.02521	0.484259	-4.18209	2.88848e-05	0.000307036	ID=OE9A104718T1;Parent=OE9A104718;Name=OE9A104718T1;product=OE9A104718P1;Description=zinc finger ZAT10-like;Ontology_term=GO:0046872
OE9A014402	35.7267	-2.02376	0.433033	-4.67345	2.96176e-06	4.00497e-05	ID=OE9A014402T1;Parent=OE9A014402;Name=OE9A014402T1;product=OE9A014402P1;Description=auxin-responsive SAUR32-like;Ontology_term=GO:0009733
OE9A064560	28.8221	-2.01957	0.674285	-2.99513	0.00274331	0.0156839	ID=OE9A064560T1;Parent=OE9A064560;Name=OE9A064560T1;product=OE9A064560P1
OE9A003051	3721.97	-2.01952	0.336829	-5.99568	2.02637e-09	4.93269e-08	ID=OE9A003051T1;Parent=OE9A003051;Name=OE9A003051T1;product=OE9A003051P1
OE9A040615	7.75431	-2.01245	0.905685	-2.22202	0.0262821	0.0934793	ID=OE9A040615T1;Parent=OE9A040615;Name=OE9A040615T1;product=OE9A040615P1;Description=beta-amylase-like;Ontology_term=GO:0000272%2C GO:0005982%2C GO:0005985%2C GO:0016161
OE9A112792	6.41209	-2.01221	0.671861	-2.99497	0.00274469	0.0156884	ID=OE9A112792T1;Parent=OE9A112792;Name=OE9A112792T1;product=OE9A112792P1
OE9A034712	311.251	-2.01204	0.31323	-6.42351	1.33171e-10	3.99152e-09	ID=OE9A034712T1;Parent=OE9A034712;Name=OE9A034712T1;product=OE9A034712P1;Description=U-box domain-containing 18-like;Ontology_term=GO:0004842%2C GO:0005515%2C GO:0005634%2C GO:0005737%2C GO:0016567
OE9A089731	269.848	-2.01003	0.470514	-4.27199	1.93733e-05	0.00021628	ID=OE9A089731T1;Parent=OE9A089731;Name=OE9A089731T1;product=OE9A089731P1;Description=scarecrow 21;Ontology_term=GO:0006355
OE9A115438	2420.1	-2.00986	0.293551	-6.84673	7.55561e-12	2.75884e-10	ID=OE9A115438T1;Parent=OE9A115438;Name=OE9A115438T1;product=OE9A115438P1;Description=plastocyanin, chloroplastic;Ontology_term=GO:0005507%2C GO:0006118%2C GO:0009055%2C GO:0009535%2C GO:0055114
OE9A005899	331.23	-2.00483	0.603196	-3.32368	0.000888369	0.00608212	ID=OE9A005899T1;Parent=OE9A005899;Name=OE9A005899T1;product=OE9A005899P1;Description=metalloendo ase 2-MMP-like;Ontology_term=GO:0004222%2C GO:0006508%2C GO:0008270%2C GO:0016021%2C GO:0031012

## Sheet: ShinyGO DOWN FC <-2
	Enrichment FDR	nGenes	Pathway Genes	Fold Enrichment	Pathways (click for details)	Genes
	6.7e-13	49	1164	3.8	GO:0003700 Transcription factor activity, sequence-specific DNA binding	OE9A000299 OE9A002219 OE9A004162 OE9A005875 OE9A007230 OE9A009930 OE9A012128 OE9A016967 OE9A019029 OE9A023796 OE9A028341 OE9A031439 OE9A033137 OE9A033879 OE9A040591 OE9A045301 OE9A046856 OE9A047454 OE9A051495 OE9A052519 OE9A053339 OE9A060030 OE9A065557 OE9A066307 OE9A069211 OE9A070773 OE9A073762 OE9A075123 OE9A076184 OE9A079911 OE9A080356 OE9A081748 OE9A084330 OE9A088051 OE9A089778 OE9A092718 OE9…
	4.9e-11	64	2097	2.8	GO:0006355 Reg. of transcription, DNA-templated	OE9A000299 OE9A002219 OE9A004162 OE9A005875 OE9A007230 OE9A009098 OE9A009168 OE9A009930 OE9A012128 OE9A015716 OE9A016264 OE9A016967 OE9A019029 OE9A023796 OE9A028341 OE9A031439 OE9A031590 OE9A033137 OE9A033879 OE9A040591 OE9A044457 OE9A045301 OE9A046856 OE9A047454 OE9A051495 OE9A052015 OE9A052519 OE9A053339 OE9A060030 OE9A061095 OE9A061628 OE9A066307 OE9A069211 OE9A073762 OE9A075123 OE9A076184 OE9…
	5.3e-08	65	2562	2.3	GO:0003677 DNA binding	OE9A000186 OE9A000299 OE9A002219 OE9A005875 OE9A007230 OE9A009098 OE9A009168 OE9A009930 OE9A015716 OE9A016967 OE9A019029 OE9A028039 OE9A028341 OE9A031439 OE9A031590 OE9A033137 OE9A033879 OE9A040591 OE9A043750 OE9A043760 OE9A044457 OE9A045301 OE9A046856 OE9A047454 OE9A051225 OE9A051495 OE9A052015 OE9A052054 OE9A052519 OE9A053339 OE9A061095 OE9A065557 OE9A066307 OE9A073762 OE9A075123 OE9A075333 OE9…
	7.1e-07	10	73	12.5	GO:0016762 Xyloglucan:xyloglucosyl transferase activity	OE9A008141 OE9A030636 OE9A032361 OE9A033910 OE9A041022 OE9A047542 OE9A090630 OE9A090863 OE9A100291 OE9A117660
	4.6e-05	9	89	9.2	GO:0042546 Cell wall biogenesis	OE9A008141 OE9A030636 OE9A032361 OE9A041022 OE9A047542 OE9A090630 OE9A090863 OE9A100291 OE9A117660
	0.00012	15	307	4.5	GO:0004842 Ubiquitin-protein transferase activity	OE9A008111 OE9A020210 OE9A022026 OE9A027777 OE9A034712 OE9A041636 OE9A045269 OE9A045980 OE9A048266 OE9A069581 OE9A071261 OE9A072034 OE9A078479 OE9A084465 OE9A121458
	0.00028	15	334	4.1	GO:0004553 Hydrolase activity, hydrolyzing O-glycosyl compounds	OE9A002862 OE9A008141 OE9A009027 OE9A023438 OE9A030636 OE9A032361 OE9A033910 OE9A041022 OE9A047542 OE9A079507 OE9A087360 OE9A090630 OE9A090863 OE9A100291 OE9A117660
	0.00044	15	355	3.9	GO:0016567 Protein ubiquitination	OE9A008111 OE9A020210 OE9A022026 OE9A027777 OE9A034712 OE9A041636 OE9A045269 OE9A045980 OE9A048266 OE9A069581 OE9A071261 OE9A072034 OE9A078479 OE9A084465 OE9A121458
	0.00044	11	195	5.1	GO:0048046 Apoplast	OE9A008141 OE9A028936 OE9A030636 OE9A032361 OE9A033910 OE9A041022 OE9A047542 OE9A090630 OE9A090863 OE9A100291 OE9A117660
	0.00044	20	588	3.1	GO:0005509 Calcium ion binding	OE9A002067 OE9A006276 OE9A006330 OE9A020249 OE9A023580 OE9A024278 OE9A024806 OE9A027095 OE9A049638 OE9A051537 OE9A057599 OE9A058655 OE9A068607 OE9A090940 OE9A102829 OE9A103265 OE9A105546 OE9A114342 OE9A115883 OE9A118456
	0.00062	9	134	6.1	GO:0010411 Xyloglucan metabolic process	OE9A008141 OE9A030636 OE9A032361 OE9A041022 OE9A047542 OE9A090630 OE9A090863 OE9A100291 OE9A117660
	0.0012	49	2430	1.8	GO:0005667 Transcription factor complex	OE9A000299 OE9A000795 OE9A002219 OE9A004162 OE9A005875 OE9A007230 OE9A009930 OE9A012128 OE9A016967 OE9A019029 OE9A023796 OE9A028341 OE9A033137 OE9A033879 OE9A040591 OE9A045301 OE9A046856 OE9A047454 OE9A051495 OE9A052519 OE9A053339 OE9A060030 OE9A065557 OE9A066307 OE9A069211 OE9A073762 OE9A075123 OE9A076184 OE9A078448 OE9A079911 OE9A080356 OE9A081748 OE9A084330 OE9A088051 OE9A089778 OE9A092718 OE9…
	0.0012	10	186	4.9	GO:0016747 Transferase activity, transferring acyl groups other than amino-acyl groups	OE9A020062 OE9A035167 OE9A044833 OE9A058653 OE9A065394 OE9A077751 OE9A087924 OE9A090531 OE9A090645 OE9A103776
	0.0018	3	8	34.2	GO:0009814 Defense response, incompatible interaction	OE9A027777 OE9A041636 OE9A072034
	0.0065	3	12	22.8	GO:0080031 Methyl salicylate esterase activity	OE9A022843 OE9A025153 OE9A025905
	0.0071	4	30	12.2	GO:0016161 Beta-amylase activity	OE9A011543 OE9A040615 OE9A082355 OE9A109153
	0.0074	3	13	21	GO:0003830 Beta-1,4-mannosylglycoprotein 4-beta-N-acetylglucosaminyltransferase activity	OE9A042020 OE9A050550 OE9A081767
	0.01	4	34	10.7	GO:0030014 CCR4-NOT complex	OE9A023470 OE9A077596 OE9A098762 OE9A105623
	0.014	2	4	45.6	GO:0090567 Reproductive shoot system development	OE9A099889 OE9A100773
	0.036	3	23	11.9	GO:0090503 RNA phosphodiester bond hydrolysis, exonucleolytic	OE9A023470 OE9A077596 OE9A098762
