# Supplementary material for: Comparative transcriptomics of biopesticide-treated olives subjected to Xylella infection
Source: Research Square preprint supplement (doi:10.21203/rs.3.rs-8603179/v1), 2026-01-29
Supplement: Supplementary file 9 [file 7b294c6269991897750289f8.xlsx]

## Sheet: UP FC >2
List of Differential Expressed Genes (DEGs) FC >2 in T6_Sankari©Infect
Gene ID	baseMean	log2FoldChange	lfcSE	stat	pvalue	padj	id gene	Description
OE9A119264	270.764	8.71465	1.82571	4.7733	1.81236e-06	9.28833e-05	OE9A119264	ID=OE9A119264T1;Parent=OE9A119264;Name=OE9A119264T1;product=OE9A119264P1;Description=Vacuolar cation proton exchanger 3;Ontology_term=GO:0006885%2C GO:0015369%2C GO:0016021%2C GO:0070588
OE9A114203	15.6251	7.02449	2.06543	3.40098	0.000671458	0.01834	OE9A114203	ID=OE9A114203T1;Parent=OE9A114203;Name=OE9A114203T1;product=OE9A114203P1;Description=polyphenol oxidase I, chloroplastic-like;Ontology_term=GO:0004097%2C GO:0006118%2C GO:0006570%2C GO:0046148%2C GO:0046872%2C GO:0055114
OE9A042006	27.1869	6.97084	1.39356	5.00216	5.66909e-07	3.24797e-05	OE9A042006	ID=OE9A042006T1;Parent=OE9A042006;Name=OE9A042006T1;product=OE9A042006P1;Description=probable WRKY transcription factor 53;Ontology_term=GO:0003700%2C GO:0005667%2C GO:0006355%2C GO:0043565%2C GO:0045449
OE9A046853	32.4767	6.77581	1.37524	4.92701	8.34988e-07	4.63215e-05	OE9A046853	ID=OE9A046853T1;Parent=OE9A046853;Name=OE9A046853T1;product=OE9A046853P1;Description=butyrate-- ligase AAE11, peroxisomal-like;Ontology_term=GO:0008152%2C GO:0016874
OE9A019254	691.353	6.69152	0.540359	12.3835	3.21201e-35	7.02359e-32	OE9A019254	ID=OE9A019254T1;Parent=OE9A019254;Name=OE9A019254T1;product=OE9A019254P1;Description=BON1-associated 2-like;Ontology_term=GO:0005515
OE9A101474	15.4156	6.51415	1.38605	4.69978	2.60439e-06	0.000128216	OE9A101474	ID=OE9A101474T1;Parent=OE9A101474;Name=OE9A101474T1;product=OE9A101474P1;Description=ubiquinol oxidase 2, mitochondrial-like isoform X2;Ontology_term=GO:0006118%2C GO:0009916%2C GO:0016021%2C GO:0046872%2C GO:0055114%2C GO:0070469
OE9A100850	11.2101	6.28534	1.81994	3.45359	0.00055318	0.0156585	OE9A100850	ID=OE9A100850T1;Parent=OE9A100850;Name=OE9A100850T1;product=OE9A100850P1
OE9A099586	9.76608	6.25488	1.48319	4.21718	2.47378e-05	0.00100328	OE9A099586	ID=OE9A099586T1;Parent=OE9A099586;Name=OE9A099586T1;product=OE9A099586P1;Description=probable E3 ubiquitin- ligase LUL4;Ontology_term=GO:0005515%2C GO:0008270
OE9A073696	14.1412	6.08709	1.52638	3.98792	6.66547e-05	0.00241911	OE9A073696	ID=OE9A073696T1;Parent=OE9A073696;Name=OE9A073696T1;product=OE9A073696P1
OE9A041554	16.9945	6.08334	1.48666	4.09195	4.27752e-05	0.00163618	OE9A041554	ID=OE9A041554T1;Parent=OE9A041554;Name=OE9A041554T1;product=OE9A041554P1;Description=myb-related Myb4-like;Ontology_term=GO:0003677
OE9A002800	15.4562	6.05234	1.47812	4.09462	4.22861e-05	0.00161983	OE9A002800	ID=OE9A002800T1;Parent=OE9A002800;Name=OE9A002800T1;product=OE9A002800P1;Description=LYK5;Ontology_term=GO:0004672%2C GO:0005524%2C GO:0006468%2C GO:0016020
OE9A045533	8.69569	5.97964	1.50967	3.9609	7.46684e-05	0.00266209	OE9A045533	ID=OE9A045533T1;Parent=OE9A045533;Name=OE9A045533T1;product=OE9A045533P1;Description=SAL1 phosphatase-like;Ontology_term=GO:0006790%2C GO:0008441%2C GO:0016311%2C GO:0046854
OE9A019272	12.0421	5.93438	1.39038	4.26818	1.97071e-05	0.000813071	OE9A019272	ID=OE9A019272T1;Parent=OE9A019272;Name=OE9A019272T1;product=OE9A019272P1;Description=Defense-related containing SCP domain;Ontology_term=GO:0005576
OE9A095641	15.3022	5.81155	1.40997	4.12177	3.75977e-05	0.00145511	OE9A095641	ID=OE9A095641T1;Parent=OE9A095641;Name=OE9A095641T1;product=OE9A095641P1
OE9A021387	29.6671	5.77187	2.05498	2.80872	0.00497395	0.0900113	OE9A021387	ID=OE9A021387T1;Parent=OE9A021387;Name=OE9A021387T1;product=OE9A021387P1;Description=hexose carrier HEX6-like;Ontology_term=GO:0016021%2C GO:0022891%2C GO:0055085
OE9A007517	34.0639	5.7451	1.10705	5.18955	2.10801e-07	1.29541e-05	OE9A007517	ID=OE9A007517T1;Parent=OE9A007517;Name=OE9A007517T1;product=OE9A007517P1
OE9A008626	64.1526	5.64656	0.823202	6.85926	6.92178e-12	8.4478e-10	OE9A008626	ID=OE9A008626T1;Parent=OE9A008626;Name=OE9A008626T1;product=OE9A008626P1;Description=elicitor-responsive 1-like;Ontology_term=GO:0005515
OE9A078886	202.183	5.51223	0.453864	12.1451	6.08966e-34	1.06528e-30	OE9A078886	ID=OE9A078886T1;Parent=OE9A078886;Name=OE9A078886T1;product=OE9A078886P1;Description=wall-associated receptor kinase 2-like;Ontology_term=GO:0004672%2C GO:0005524%2C GO:0006468
OE9A029983	14.3014	5.49052	1.42496	3.85311	0.000116626	0.00393349	OE9A029983	ID=OE9A029983T1;Parent=OE9A029983;Name=OE9A029983T1;product=OE9A029983P1
OE9A109149	127.746	5.4824	0.761472	7.19974	6.03277e-13	8.46524e-11	OE9A109149	ID=OE9A109149T1;Parent=OE9A109149;Name=OE9A109149T1;product=OE9A109149P1;Description=disease resistance RPM1-like;Ontology_term=GO:0043531
OE9A018887	9.91997	5.48093	1.49796	3.65894	0.00025326	0.00779995	OE9A018887	ID=OE9A018887T1;Parent=OE9A018887;Name=OE9A018887T1;product=OE9A018887P1
OE9A118985	10.9186	5.48047	1.46189	3.74888	0.000177625	0.00571886	OE9A118985	ID=OE9A118985T1;Parent=OE9A118985;Name=OE9A118985T1;product=OE9A118985P1
OE9A024278	19.5736	5.45002	1.39847	3.89712	9.7343e-05	0.00334768	OE9A024278	ID=OE9A024278T1;Parent=OE9A024278;Name=OE9A024278T1;product=OE9A024278P1;Description=calcium-binding CML38;Ontology_term=GO:0005509
OE9A102863	9.1176	5.33282	1.29616	4.11431	3.88332e-05	0.0014985	OE9A102863	ID=OE9A102863T1;Parent=OE9A102863;Name=OE9A102863T1;product=OE9A102863P1
OE9A027095	536.31	5.28197	0.427552	12.354	4.63571e-35	9.357e-32	OE9A027095	ID=OE9A027095T1;Parent=OE9A027095;Name=OE9A027095T1;product=OE9A027095P1;Description=calcium-binding CML38-like;Ontology_term=GO:0005509
OE9A054617	203.656	5.23431	0.771916	6.78093	1.19406e-11	1.36822e-09	OE9A054617	ID=OE9A054617T1;Parent=OE9A054617;Name=OE9A054617T1;product=OE9A054617P1;Description=beta-glucosidase-like;Ontology_term=GO:0004553%2C GO:0005975
OE9A102668	218.486	5.22674	0.644089	8.11493	4.8605e-16	9.242e-14	OE9A102668	ID=OE9A102668T1;Parent=OE9A102668;Name=OE9A102668T1;product=OE9A102668P1;Description=DMR6-LIKE OXYGENASE 1;Ontology_term=GO:0005506%2C GO:0051213%2C GO:0055114
OE9A061095	12.0664	5.21483	1.11616	4.67211	2.98121e-06	0.000145674	OE9A061095	ID=OE9A061095T1;Parent=OE9A061095;Name=OE9A061095T1;product=OE9A061095P1;Description=NAC domain-containing 62-like;Ontology_term=GO:0003677%2C GO:0006355
OE9A103007	37.2317	5.19244	0.904447	5.74101	9.41137e-09	6.87895e-07	OE9A103007	ID=OE9A103007T1;Parent=OE9A103007;Name=OE9A103007T1;product=OE9A103007P1;Description=probable inactive poly [ADP-ribose] polymerase SRO5;Ontology_term=GO:0003950
OE9A097645	1873.2	5.19156	0.357712	14.5132	9.98828e-48	8.73641e-44	OE9A097645	ID=OE9A097645T1;Parent=OE9A097645;Name=OE9A097645T1;product=OE9A097645P1;Description=probable WRKY transcription factor 33;Ontology_term=GO:0003700%2C GO:0005667%2C GO:0006355%2C GO:0043565%2C GO:0045449
OE9A056651	1454.85	5.1843	0.350563	14.7885	1.7373e-49	4.55868e-45	OE9A056651	ID=OE9A056651T1;Parent=OE9A056651;Name=OE9A056651T1;product=OE9A056651P1;Description=probable WRKY transcription factor 33;Ontology_term=GO:0003700%2C GO:0005667%2C GO:0006355%2C GO:0043565%2C GO:0045449
OE9A065276	17.1041	5.16319	0.984711	5.24335	1.57684e-07	9.78161e-06	OE9A065276	ID=OE9A065276T1;Parent=OE9A065276;Name=OE9A065276T1;product=OE9A065276P1;md5=81bac2ab6db63a0b255bd05429b062ff;INTERPRO=<table><tr><th>DB</th><th>ID</th><th>Description</th></tr><tr><td>PANTHER</td><td>PTHR23155</td><td></td></tr><tr><td>PANTHER</td><td>PTHR23155:SF634</td><td></td></tr><tr><td>Pfam</td><td>PF00931</td><td>NB-ARC domain</td></tr><tr><td>SUPERFAMILY</td><td>SSF52058</td><td></td></…
OE9A090863	3121.95	5.15046	0.468557	10.9922	4.16776e-28	3.314e-25	OE9A090863	ID=OE9A090863T1;Parent=OE9A090863;Name=OE9A090863T1;product=OE9A090863P1;Description=xyloglucan endotransglycosylase hydrolase;Ontology_term=GO:0004553%2C GO:0005618%2C GO:0010411%2C GO:0016762%2C GO:0042546%2C GO:0048046%2C GO:0071555
OE9A010324	69.3327	5.12377	1.37283	3.73227	0.000189761	0.00604287	OE9A010324	ID=OE9A010324T1;Parent=OE9A010324;Name=OE9A010324T1;product=OE9A010324P1
OE9A100291	1350.99	5.10593	0.620659	8.22662	1.92564e-16	3.85715e-14	OE9A100291	ID=OE9A100291T1;Parent=OE9A100291;Name=OE9A100291T1;product=OE9A100291P1;Description=xyloglucan endotransglycosylase hydrolase;Ontology_term=GO:0004553%2C GO:0005618%2C GO:0010411%2C GO:0016762%2C GO:0042546%2C GO:0048046%2C GO:0071555
OE9A001737	27.9819	5.0607	1.07483	4.70837	2.49706e-06	0.000123163	OE9A001737	ID=OE9A001737T1;Parent=OE9A001737;Name=OE9A001737T1;product=OE9A001737P1;Description=PLANT CADMIUM RESISTANCE 2-like;Ontology_term=GO:0016021
OE9A076093	14.7563	4.96976	1.68184	2.95496	0.0031271	0.063658	OE9A076093	ID=OE9A076093T1;Parent=OE9A076093;Name=OE9A076093T1;product=OE9A076093P1;Description=E3 ubiquitin- ligase PUB23-like;Ontology_term=GO:0004842%2C GO:0005488%2C GO:0016567
OE9A051495	1622.88	4.91539	0.424211	11.5871	4.78914e-31	5.98414e-28	OE9A051495	ID=OE9A051495T1;Parent=OE9A051495;Name=OE9A051495T1;product=OE9A051495P1;Description=ethylene-responsive transcription factor ERF017-like;Ontology_term=GO:0003677%2C GO:0003700%2C GO:0005667%2C GO:0006355%2C GO:0045449
OE9A030746	10.7604	4.89815	1.3313	3.67921	0.000233955	0.00726507	OE9A030746	ID=OE9A030746T1;Parent=OE9A030746;Name=OE9A030746T1;product=OE9A030746P1;Description=probably inactive leucine-rich repeat receptor kinase At5g48380;Ontology_term=GO:0004672%2C GO:0005524%2C GO:0006468%2C GO:0016021
OE9A031175	30.8976	4.86718	1.04228	4.66976	3.01546e-06	0.000146801	OE9A031175	ID=OE9A031175T1;Parent=OE9A031175;Name=OE9A031175T1;product=OE9A031175P1;Description=probable WRKY transcription factor 31;Ontology_term=GO:0003700%2C GO:0005667%2C GO:0006355%2C GO:0043565%2C GO:0045449
OE9A118750	16.331	4.84738	1.2135	3.99456	6.48149e-05	0.00236214	OE9A118750	ID=OE9A118750T1;Parent=OE9A118750;Name=OE9A118750T1;product=OE9A118750P1;Description=probable WRKY transcription factor 17;Ontology_term=GO:0003700%2C GO:0005667%2C GO:0006355%2C GO:0043565%2C GO:0045449
OE9A098499	2594.93	4.84059	0.442234	10.9458	6.96309e-28	5.37386e-25	OE9A098499	ID=OE9A098499T1;Parent=OE9A098499;Name=OE9A098499T1;product=OE9A098499P1
OE9A079777	15.9703	4.83955	1.29087	3.74906	0.000177499	0.00571886	OE9A079777	ID=OE9A079777T1;Parent=OE9A079777;Name=OE9A079777T1;product=OE9A079777P1;Description=myb-related Myb4-like;Ontology_term=GO:0003677
OE9A032622	8.87669	4.83323	1.7492	2.76311	0.00572533	0.0998224	OE9A032622	ID=OE9A032622T1;Parent=OE9A032622;Name=OE9A032622T1;product=OE9A032622P1;Description=lon protease homolog 2, peroxisomal-like isoform X1;Ontology_term=GO:0004176%2C GO:0004252%2C GO:0005524%2C GO:0005782%2C GO:0006510%2C GO:0006515%2C GO:0016485%2C GO:0016558
OE9A048804	6223.34	4.82803	0.406425	11.8793	1.51672e-32	2.21104e-29	OE9A048804	ID=OE9A048804T1;Parent=OE9A048804;Name=OE9A048804T1;product=OE9A048804P1
OE9A028053	56.3948	4.80939	0.747508	6.4339	1.24375e-10	1.20874e-08	OE9A028053	ID=OE9A028053T1;Parent=OE9A028053;Name=OE9A028053T1;product=OE9A028053P1;Description=phospholipase A1-Igamma1, chloroplastic;Ontology_term=GO:0006629%2C GO:0016787
OE9A016940	16.3421	4.76237	1.29371	3.68118	0.000232158	0.00721781	OE9A016940	ID=OE9A016940T1;Parent=OE9A016940;Name=OE9A016940T1;product=OE9A016940P1;Description=calcium-binding PBP1-like;Ontology_term=GO:0005509
OE9A037154	25.6906	4.73638	0.950157	4.98483	6.20148e-07	3.52222e-05	OE9A037154	ID=OE9A037154T1;Parent=OE9A037154;Name=OE9A037154T1;product=OE9A037154P1
OE9A077952	47.7055	4.73533	0.757771	6.24903	4.13015e-10	3.72423e-08	OE9A077952	ID=OE9A077952T1;Parent=OE9A077952;Name=OE9A077952T1;product=OE9A077952P1;Description=ACD11 homolog;Ontology_term=GO:0005634%2C GO:0005737%2C GO:0017089%2C GO:0046836%2C GO:0051861
OE9A052108	5996.87	4.7282	0.367162	12.8777	6.01032e-38	1.97138e-34	OE9A052108	ID=OE9A052108T1;Parent=OE9A052108;Name=OE9A052108T1;product=OE9A052108P1
OE9A014162	17.558	4.6945	1.40646	3.33782	0.000844389	0.0223156	OE9A014162	ID=OE9A014162T1;Parent=OE9A014162;Name=OE9A014162T1;product=OE9A014162P1
OE9A008243	76.0708	4.68041	0.541369	8.6455	5.35691e-18	1.36471e-15	OE9A008243	ID=OE9A008243T1;Parent=OE9A008243;Name=OE9A008243T1;product=OE9A008243P1;Description=probable phosphatase 2C 25;Ontology_term=GO:0004721%2C GO:0006470%2C GO:0043169%2C GO:0044763
OE9A004883	10.3941	4.61141	1.45237	3.17509	0.0014979	0.0358294	OE9A004883	ID=OE9A004883T1;Parent=OE9A004883;Name=OE9A004883T1;product=OE9A004883P1;Description=sodium calcium exchanger NCL2-like;Ontology_term=GO:0005509%2C GO:0016021%2C GO:0055085
OE9A072466	2798.16	4.59957	0.408984	11.2463	2.41414e-29	2.53388e-26	OE9A072466	ID=OE9A072466T1;Parent=OE9A072466;Name=OE9A072466T1;product=OE9A072466P1;Description=BON1-associated 2-like;Ontology_term=GO:0005515
OE9A014582	257.974	4.58055	0.348532	13.1424	1.88205e-39	7.05501e-36	OE9A014582	ID=OE9A014582T1;Parent=OE9A014582;Name=OE9A014582T1;product=OE9A014582P1
OE9A095034	2494.54	4.57344	0.4523	10.1115	4.91086e-24	2.57722e-21	OE9A095034	ID=OE9A095034T1;Parent=OE9A095034;Name=OE9A095034T1;product=OE9A095034P1
OE9A076184	64.2582	4.56595	0.701279	6.51089	7.47063e-11	7.53959e-09	OE9A076184	ID=OE9A076184T1;Parent=OE9A076184;Name=OE9A076184T1;product=OE9A076184P1;Description=ethylene-responsive transcription factor ERF017-like;Ontology_term=GO:0003677%2C GO:0003700%2C GO:0005667%2C GO:0006355%2C GO:0045449
OE9A033158	336.176	4.55847	0.468709	9.72557	2.34584e-22	1.0433e-19	OE9A033158	ID=OE9A033158T1;Parent=OE9A033158;Name=OE9A033158T1;product=OE9A033158P1
OE9A041022	941.488	4.55718	0.503431	9.05225	1.40058e-19	4.48186e-17	OE9A041022	ID=OE9A041022T1;Parent=OE9A041022;Name=OE9A041022T1;product=OE9A041022P1;Description=xyloglucan endotransglycosylase hydrolase;Ontology_term=GO:0004553%2C GO:0005618%2C GO:0010411%2C GO:0016762%2C GO:0042546%2C GO:0048046%2C GO:0071555
OE9A104251	127.511	4.55493	0.594871	7.657	1.9032e-14	3.14088e-12	OE9A104251	ID=OE9A104251T1;Parent=OE9A104251;Name=OE9A104251T1;product=OE9A104251P1
OE9A002067	935.451	4.54231	0.409935	11.0806	1.55892e-28	1.27831e-25	OE9A002067	ID=OE9A002067T1;Parent=OE9A002067;Name=OE9A002067T1;product=OE9A002067P1;Description=calcium-binding PBP1-like;Ontology_term=GO:0005509
OE9A014390	531.827	4.4944	0.358118	12.55	3.97261e-36	9.47648e-33	OE9A014390	ID=OE9A014390T1;Parent=OE9A014390;Name=OE9A014390T1;product=OE9A014390P1;Description=RING-H2 finger ATL60-like;Ontology_term=GO:0005515%2C GO:0008270%2C GO:0044267
OE9A055375	12.5044	4.47207	1.03916	4.30355	1.68081e-05	0.000707936	OE9A055375	ID=OE9A055375T1;Parent=OE9A055375;Name=OE9A055375T1;product=OE9A055375P1;Description=zinc finger ZAT10-like;Ontology_term=GO:0003676%2C GO:0046872
OE9A023527	4841.37	4.46151	0.401782	11.1043	1.19536e-28	1.04554e-25	OE9A023527	ID=OE9A023527T1;Parent=OE9A023527;Name=OE9A023527T1;product=OE9A023527P1
OE9A004696	564.798	4.45644	0.30333	14.6917	7.28402e-49	9.55663e-45	OE9A004696	ID=OE9A004696T1;Parent=OE9A004696;Name=OE9A004696T1;product=OE9A004696P1;Description=mitogen-activated kinase 3;Ontology_term=GO:0000169%2C GO:0004707%2C GO:0005524%2C GO:0005622%2C GO:0007178%2C GO:0009069%2C GO:0009555%2C GO:0010120%2C GO:0010183%2C GO:0010224%2C GO:0010229%2C GO:0048481%2C GO:0080136
OE9A097757	707.524	4.43873	0.383073	11.5872	4.78765e-31	5.98414e-28	OE9A097757	ID=OE9A097757T1;Parent=OE9A097757;Name=OE9A097757T1;product=OE9A097757P1
OE9A006362	5581.69	4.40364	0.404213	10.8944	1.22626e-27	9.19347e-25	OE9A006362	ID=OE9A006362T1;Parent=OE9A006362;Name=OE9A006362T1;product=OE9A006362P1
OE9A045269	1307.8	4.38778	0.439221	9.9899	1.6876e-23	8.35522e-21	OE9A045269	ID=OE9A045269T1;Parent=OE9A045269;Name=OE9A045269T1;product=OE9A045269P1;Description=E3 ubiquitin- ligase PUB23-like;Ontology_term=GO:0004842%2C GO:0005488%2C GO:0016567%2C GO:0016874
OE9A092389	326.253	4.36053	0.492944	8.8459	9.07928e-19	2.56173e-16	OE9A092389	ID=OE9A092389T1;Parent=OE9A092389;Name=OE9A092389T1;product=OE9A092389P1;Description=NAC domain-containing 90;Ontology_term=GO:0003677%2C GO:0005634%2C GO:0006355
OE9A041775	1319.7	4.32997	0.352459	12.285	1.0901e-34	2.04316e-31	OE9A041775	ID=OE9A041775T1;Parent=OE9A041775;Name=OE9A041775T1;product=OE9A041775P1;Description=oxalate-- ligase-like;Ontology_term=GO:0009506%2C GO:0009570%2C GO:0009735%2C GO:0009805%2C GO:0009809%2C GO:0009811%2C GO:0010030%2C GO:0010214%2C GO:0016207%2C GO:0033611%2C GO:0046487%2C GO:0048046%2C GO:0050203%2C GO:0050832
OE9A110715	441.53	4.32445	0.437381	9.88716	4.73261e-23	2.25789e-20	OE9A110715	ID=OE9A110715T1;Parent=OE9A110715;Name=OE9A110715T1;product=OE9A110715P1
OE9A087938	90.3507	4.3231	0.550811	7.8486	4.20719e-15	7.40918e-13	OE9A087938	ID=OE9A087938T1;Parent=OE9A087938;Name=OE9A087938T1;product=OE9A087938P1;Description=U-box domain-containing 21-like;Ontology_term=GO:0004842%2C GO:0005488%2C GO:0016567
OE9A007593	130.104	4.31188	0.459201	9.38995	6.00263e-21	2.35088e-18	OE9A007593	ID=OE9A007593T1;Parent=OE9A007593;Name=OE9A007593T1;product=OE9A007593P1
OE9A102590	286.077	4.3001	0.49603	8.66902	4.35844e-18	1.13233e-15	OE9A102590	ID=OE9A102590T1;Parent=OE9A102590;Name=OE9A102590T1;product=OE9A102590P1;Description=syntaxin-121-like;Ontology_term=GO:0000149%2C GO:0005484%2C GO:0005886%2C GO:0006886%2C GO:0006887%2C GO:0006906%2C GO:0012505%2C GO:0016021%2C GO:0031201%2C GO:0048278
OE9A083708	62.8631	4.29667	0.835801	5.14078	2.73606e-07	1.64666e-05	OE9A083708	ID=OE9A083708T1;Parent=OE9A083708;Name=OE9A083708T1;product=OE9A083708P1;Description=probable inorganic phosphate transporter 1-9;Ontology_term=GO:0016021%2C GO:0022857%2C GO:0055085
OE9A049811	1373.15	4.28484	0.446541	9.59562	8.34165e-22	3.58828e-19	OE9A049811	ID=OE9A049811T1;Parent=OE9A049811;Name=OE9A049811T1;product=OE9A049811P1;Description=zinc finger ZAT10-like;Ontology_term=GO:0046872
OE9A037441	225.529	4.25838	0.482297	8.82935	1.05282e-18	2.908e-16	OE9A037441	ID=OE9A037441T1;Parent=OE9A037441;Name=OE9A037441T1;product=OE9A037441P1
OE9A037727	257.229	4.23615	0.508821	8.32543	8.40218e-17	1.82209e-14	OE9A037727	ID=OE9A037727T1;Parent=OE9A037727;Name=OE9A037727T1;product=OE9A037727P1;Description=probable galacturonosyltransferase-like 10;Ontology_term=GO:0000271%2C GO:0005794%2C GO:0016757
OE9A058655	4187.01	4.21595	0.348299	12.1044	1.00099e-33	1.64162e-30	OE9A058655	ID=OE9A058655T1;Parent=OE9A058655;Name=OE9A058655T1;product=OE9A058655P1;Description=probable calcium-binding CML45;Ontology_term=GO:0005509
OE9A050117	75.6542	4.20155	0.559722	7.50649	6.07356e-14	9.54313e-12	OE9A050117	ID=OE9A050117T1;Parent=OE9A050117;Name=OE9A050117T1;product=OE9A050117P1
OE9A093988	215.981	4.19814	0.84001	4.99773	5.80099e-07	3.30909e-05	OE9A093988	ID=OE9A093988T1;Parent=OE9A093988;Name=OE9A093988T1;product=OE9A093988P1;Description=beta-glucosidase-like;Ontology_term=GO:0004553%2C GO:0005975
OE9A020210	391.927	4.17577	0.446836	9.3452	9.17157e-21	3.48817e-18	OE9A020210	ID=OE9A020210T1;Parent=OE9A020210;Name=OE9A020210T1;product=OE9A020210P1;Description=E3 ubiquitin- ligase PUB23-like;Ontology_term=GO:0004842%2C GO:0005488%2C GO:0016567%2C GO:0016874
OE9A076786	459.522	4.16522	0.508076	8.19802	2.44381e-16	4.7855e-14	OE9A076786	ID=OE9A076786T1;Parent=OE9A076786;Name=OE9A076786T1;product=OE9A076786P1
OE9A032361	993.227	4.16492	0.584915	7.12056	1.07491e-12	1.4539e-10	OE9A032361	ID=OE9A032361T1;Parent=OE9A032361;Name=OE9A032361T1;product=OE9A032361P1;Description=probable xyloglucan endotransglucosylase hydrolase 23;Ontology_term=GO:0004553%2C GO:0005618%2C GO:0010411%2C GO:0016762%2C GO:0042546%2C GO:0048046%2C GO:0071555
OE9A048283	19.1097	4.16326	1.0053	4.14129	3.45362e-05	0.00135663	OE9A048283	ID=OE9A048283T1;Parent=OE9A048283;Name=OE9A048283T1;product=OE9A048283P1;Description=L-ascorbate oxidase homolog;Ontology_term=GO:0005507%2C GO:0009505%2C GO:0009506%2C GO:0016722%2C GO:0055114
OE9A023580	3558.08	4.15754	0.350904	11.8481	2.20154e-32	3.04044e-29	OE9A023580	ID=OE9A023580T1;Parent=OE9A023580;Name=OE9A023580T1;product=OE9A023580P1;Description=probable calcium-binding CML45;Ontology_term=GO:0005509
OE9A069420	14365.6	4.15466	0.368412	11.2772	1.70101e-29	1.85977e-26	OE9A069420	ID=OE9A069420T1;Parent=OE9A069420;Name=OE9A069420T1;product=OE9A069420P1;Description=zinc finger CCCH domain-containing 29-like;Ontology_term=GO:0005515%2C GO:0046872
OE9A114342	602.433	4.1496	0.412629	10.0565	8.60134e-24	4.34037e-21	OE9A114342	ID=OE9A114342T1;Parent=OE9A114342;Name=OE9A114342T1;product=OE9A114342P1;Description=calcium-binding PBP1-like;Ontology_term=GO:0005509
OE9A006737	711.604	4.13994	0.383092	10.8067	3.2014e-27	2.2704e-24	OE9A006737	ID=OE9A006737T1;Parent=OE9A006737;Name=OE9A006737T1;product=OE9A006737P1;Description=serine threonine- kinase CCR4;Ontology_term=GO:0004672%2C GO:0005524%2C GO:0006468%2C GO:0016020
OE9A075531	589.24	4.13519	0.393576	10.5067	8.04589e-26	4.69165e-23	OE9A075531	ID=OE9A075531T1;Parent=OE9A075531;Name=OE9A075531T1;product=OE9A075531P1
OE9A121694	15.9868	4.13406	1.30471	3.16857	0.00153192	0.0365101	OE9A121694	ID=OE9A121694T1;Parent=OE9A121694;Name=OE9A121694T1;product=OE9A121694P1
OE9A016847	1794.6	4.12201	0.445763	9.2471	2.30676e-20	8.2917e-18	OE9A016847	ID=OE9A016847T1;Parent=OE9A016847;Name=OE9A016847T1;product=OE9A016847P1
OE9A102910	24.2987	4.10586	0.930258	4.41368	1.01626e-05	0.000448933	OE9A102910	ID=OE9A102910T1;Parent=OE9A102910;Name=OE9A102910T1;product=OE9A102910P1;Description=ethylene-responsive transcription factor 1A-like;Ontology_term=GO:0003677%2C GO:0003700%2C GO:0005667%2C GO:0006355%2C GO:0045449
OE9A003448	72.119	4.10112	0.684257	5.99354	2.05326e-09	1.69427e-07	OE9A003448	ID=OE9A003448T1;Parent=OE9A003448;Name=OE9A003448T1;product=OE9A003448P1
OE9A103792	608.093	4.0767	0.337884	12.0654	1.60858e-33	2.48289e-30	OE9A103792	ID=OE9A103792T1;Parent=OE9A103792;Name=OE9A103792T1;product=OE9A103792P1
OE9A020249	91.1081	4.07599	0.682464	5.97247	2.33693e-09	1.91032e-07	OE9A020249	ID=OE9A020249T1;Parent=OE9A020249;Name=OE9A020249T1;product=OE9A020249P1;Description=probable calcium-binding CML31;Ontology_term=GO:0005509
OE9A032760	491.554	4.07432	0.444753	9.16087	5.14829e-20	1.82556e-17	OE9A032760	ID=OE9A032760T1;Parent=OE9A032760;Name=OE9A032760T1;product=OE9A032760P1;Description=probable calcium-binding CML45;Ontology_term=GO:0005509
OE9A107203	633.091	4.0696	0.375015	10.8518	1.95464e-27	1.42471e-24	OE9A107203	ID=OE9A107203T1;Parent=OE9A107203;Name=OE9A107203T1;product=OE9A107203P1
OE9A114584	13.8879	4.06578	1.29334	3.14364	0.00166863	0.0390978	OE9A114584	ID=OE9A114584T1;Parent=OE9A114584;Name=OE9A114584T1;product=OE9A114584P1;Description=BON1-associated 2-like;Ontology_term=GO:0005515
OE9A050865	10.2918	4.05804	1.2739	3.18552	0.00144495	0.0348488	OE9A050865	ID=OE9A050865T1;Parent=OE9A050865;Name=OE9A050865T1;product=OE9A050865P1;Description=glycosyl transferase family 1 family;Ontology_term=GO:0016021%2C GO:0016740
OE9A062775	192.155	4.05716	0.472543	8.58581	9.01961e-18	2.21191e-15	OE9A062775	ID=OE9A062775T1;Parent=OE9A062775;Name=OE9A062775T1;product=OE9A062775P1;Description=probable WRKY transcription factor 40;Ontology_term=GO:0002237%2C GO:0003700%2C GO:0005634%2C GO:0005667%2C GO:0031347%2C GO:0043565%2C GO:0044212%2C GO:0045449%2C GO:0045892
OE9A105292	17.5848	4.05106	0.995714	4.0685	4.73163e-05	0.00178132	OE9A105292	ID=OE9A105292T1;Parent=OE9A105292;Name=OE9A105292T1;product=OE9A105292P1;Description=WAT1-related At5g07050-like;Ontology_term=GO:0005886%2C GO:0016021%2C GO:0022857%2C GO:0055085
OE9A047201	818.486	4.03289	0.416536	9.68198	3.59686e-22	1.57303e-19	OE9A047201	ID=OE9A047201T1;Parent=OE9A047201;Name=OE9A047201T1;product=OE9A047201P1
OE9A050273	12.7785	4.03186	1.06612	3.7818	0.000155697	0.00508778	OE9A050273	ID=OE9A050273T1;Parent=OE9A050273;Name=OE9A050273T1;product=OE9A050273P1;Description=glucan endo-1,3-beta-glucosidase 12-like;Ontology_term=GO:0016021
OE9A090940	15.396	4.02235	1.19751	3.35892	0.000782479	0.0208027	OE9A090940	ID=OE9A090940T1;Parent=OE9A090940;Name=OE9A090940T1;product=OE9A090940P1;Description=calcium-binding CML38-like;Ontology_term=GO:0005509
OE9A085598	51.6995	4.01182	0.513297	7.8158	5.46148e-15	9.49068e-13	OE9A085598	ID=OE9A085598T1;Parent=OE9A085598;Name=OE9A085598T1;product=OE9A085598P1
OE9A057817	10.746	4.00803	1.422	2.81858	0.00482366	0.0878979	OE9A057817	ID=OE9A057817T1;Parent=OE9A057817;Name=OE9A057817T1;product=OE9A057817P1;Description=transcription factor bHLH35 isoform X2;Ontology_term=GO:0016020%2C GO:0032440%2C GO:0046983%2C GO:0055114
OE9A002607	11.4283	3.9596	1.2012	3.29636	0.000979464	0.0253964	OE9A002607	ID=OE9A002607T1;Parent=OE9A002607;Name=OE9A002607T1;product=OE9A002607P1;md5=8eea5d7f792cf225f27beb96a1c94076;INTERPRO=<table><tr><th>DB</th><th>ID</th><th>Description</th></tr><tr><td>Coils</td><td>Coil</td><td></td></tr><tr><td>Gene3D</td><td>G3DSA:3.40.50.300</td><td></td></tr><tr><td>PANTHER</td><td>PTHR23155</td><td></td></tr><tr><td>PANTHER</td><td>PTHR23155:SF634</td><td></td></tr><tr><td>…
OE9A094502	135.775	3.91766	0.583058	6.71916	1.82775e-11	2.03221e-09	OE9A094502	ID=OE9A094502T1;Parent=OE9A094502;Name=OE9A094502T1;product=OE9A094502P1;Description=NAC domain-containing 90;Ontology_term=GO:0003677%2C GO:0005634%2C GO:0006355
OE9A005899	421.306	3.91756	0.413738	9.46869	2.83369e-21	1.13574e-18	OE9A005899	ID=OE9A005899T1;Parent=OE9A005899;Name=OE9A005899T1;product=OE9A005899P1;Description=metalloendo ase 2-MMP-like;Ontology_term=GO:0004222%2C GO:0006508%2C GO:0008270%2C GO:0016021%2C GO:0031012
OE9A087855	1297.85	3.91104	0.435157	8.98767	2.52534e-19	7.61667e-17	OE9A087855	ID=OE9A087855T1;Parent=OE9A087855;Name=OE9A087855T1;product=OE9A087855P1;Description=zinc finger ZAT10-like;Ontology_term=GO:0003700%2C GO:0005634%2C GO:0005667%2C GO:0043565%2C GO:0044212%2C GO:0045449%2C GO:0046872
OE9A032181	88.1157	3.89728	0.753491	5.17229	2.31239e-07	1.40782e-05	OE9A032181	ID=OE9A032181T1;Parent=OE9A032181;Name=OE9A032181T1;product=OE9A032181P1
OE9A043612	1000.12	3.88401	0.488595	7.94935	1.87498e-15	3.3469e-13	OE9A043612	ID=OE9A043612T1;Parent=OE9A043612;Name=OE9A043612T1;product=OE9A043612P1;Description=cytochrome P450 94C1-like;Ontology_term=GO:0004497%2C GO:0005506%2C GO:0016021%2C GO:0016705%2C GO:0020037%2C GO:0055114
OE9A076025	102.269	3.8753	0.41596	9.31653	1.20204e-20	4.44248e-18	OE9A076025	ID=OE9A076025T1;Parent=OE9A076025;Name=OE9A076025T1;product=OE9A076025P1
OE9A107259	10.6084	3.86435	1.29974	2.97318	0.00294736	0.0610891	OE9A107259	ID=OE9A107259T1;Parent=OE9A107259;Name=OE9A107259T1;product=OE9A107259P1
OE9A046304	54.3331	3.86111	0.655122	5.89372	3.77588e-09	2.97534e-07	OE9A046304	ID=OE9A046304T1;Parent=OE9A046304;Name=OE9A046304T1;product=OE9A046304P1
OE9A006386	5478.76	3.85658	0.366373	10.5264	6.5302e-26	3.89437e-23	OE9A006386	ID=OE9A006386T1;Parent=OE9A006386;Name=OE9A006386T1;product=OE9A006386P1;Description=zinc finger CCCH domain-containing 29-like;Ontology_term=GO:0005515%2C GO:0046872
OE9A043605	3534.02	3.84152	0.270206	14.217	7.18623e-46	3.77133e-42	OE9A043605	ID=OE9A043605T1;Parent=OE9A043605;Name=OE9A043605T1;product=OE9A043605P1;Description=probable WRKY transcription factor 33;Ontology_term=GO:0003700%2C GO:0005667%2C GO:0006355%2C GO:0043565%2C GO:0045449
OE9A043040	10623.8	3.83629	0.359989	10.6567	1.62275e-26	1.06452e-23	OE9A043040	ID=OE9A043040T1;Parent=OE9A043040;Name=OE9A043040T1;product=OE9A043040P1;Description=zinc finger CCCH domain-containing 29-like;Ontology_term=GO:0005515%2C GO:0046872
OE9A098399	15.2655	3.82995	1.16206	3.29583	0.000981324	0.0254195	OE9A098399	ID=OE9A098399T1;Parent=OE9A098399;Name=OE9A098399T1;product=OE9A098399P1;Description=ethylene-responsive transcription factor 1A-like;Ontology_term=GO:0003677%2C GO:0003700%2C GO:0005667%2C GO:0006355%2C GO:0045449
OE9A033907	10.0421	3.81289	1.26886	3.00497	0.00265604	0.0564785	OE9A033907	ID=OE9A033907T1;Parent=OE9A033907;Name=OE9A033907T1;product=OE9A033907P1
OE9A001039	1852.29	3.80865	0.363768	10.47	1.18647e-25	6.76804e-23	OE9A001039	ID=OE9A001039T1;Parent=OE9A001039;Name=OE9A001039T1;product=OE9A001039P1;Description=O-fucosyltransferase 20-like;Ontology_term=GO:0005737%2C GO:0016021
OE9A115663	16.4289	3.80358	1.18111	3.22034	0.00128041	0.0315769	OE9A115663	ID=OE9A115663T1;Parent=OE9A115663;Name=OE9A115663T1;product=OE9A115663P1;Description=U-box domain-containing 21-like;Ontology_term=GO:0004842%2C GO:0005488%2C GO:0016567
OE9A043316	12.7063	3.80129	1.13896	3.33751	0.000845338	0.0223156	OE9A043316	ID=OE9A043316T1;Parent=OE9A043316;Name=OE9A043316T1;product=OE9A043316P1;Description=ethylene-responsive transcription factor ERF109-like;Ontology_term=GO:0003677%2C GO:0003700%2C GO:0005667%2C GO:0006355%2C GO:0045449
OE9A011680	276.356	3.79726	0.510235	7.44219	9.90282e-14	1.54673e-11	OE9A011680	ID=OE9A011680T1;Parent=OE9A011680;Name=OE9A011680T1;product=OE9A011680P1;Description=extra-large guanine nucleotide-binding 1-like;Ontology_term=GO:0003924%2C GO:0004871%2C GO:0005525%2C GO:0007186%2C GO:0031683
OE9A042695	119.607	3.79181	0.601201	6.30706	2.84393e-10	2.61842e-08	OE9A042695	ID=OE9A042695T1;Parent=OE9A042695;Name=OE9A042695T1;product=OE9A042695P1;Description=Branch domain-containing;Ontology_term=GO:0008375%2C GO:0016021
OE9A013267	12.429	3.78599	1.12441	3.36708	0.000759681	0.0203409	OE9A013267	ID=OE9A013267T1;Parent=OE9A013267;Name=OE9A013267T1;product=OE9A013267P1;Description=calmodulin-binding 60 B-like;Ontology_term=GO:0005516%2C GO:0006950
OE9A043457	8.36944	3.78566	1.30963	2.89064	0.00384455	0.074014	OE9A043457	ID=OE9A043457T2;Parent=OE9A043457;Name=OE9A043457T2;product=OE9A043457P2;Description=haloacid dehalogenase-like hydrolase domain-containing Sgpp;Ontology_term=GO:0008152%2C GO:0016787
OE9A077755	66.8993	3.78276	0.596679	6.3397	2.30219e-10	2.13461e-08	OE9A077755	ID=OE9A077755T1;Parent=OE9A077755;Name=OE9A077755T1;product=OE9A077755P1;Description=calcium-binding PBP1-like;Ontology_term=GO:0005509
OE9A097757	18.3639	3.77033	0.877166	4.29831	1.72108e-05	0.000723737	OE9A097757	ID=OE9A097757T1;Parent=OE9A097757;Name=OE9A097757T1;product=OE9A097757P1
OE9A104327	867.388	3.76351	0.382949	9.8277	8.55497e-23	3.9293e-20	OE9A104327	ID=OE9A104327T1;Parent=OE9A104327;Name=OE9A104327T1;product=OE9A104327P1;Description=uncharacterized protein LOC105179443;Ontology_term=GO:0016021
OE9A000299	2662.81	3.75035	0.411155	9.1215	7.40941e-20	2.52497e-17	OE9A000299	ID=OE9A000299T1;Parent=OE9A000299;Name=OE9A000299T1;product=OE9A000299P1;Description=dehydration-responsive element-binding 1A;Ontology_term=GO:0003677%2C GO:0003700%2C GO:0005634%2C GO:0005667%2C GO:0006355%2C GO:0045449
OE9A062828	78.8309	3.74597	0.647876	5.78192	7.38509e-09	5.52093e-07	OE9A062828	ID=OE9A062828T1;Parent=OE9A062828;Name=OE9A062828T1;product=OE9A062828P1
OE9A118212	14.1085	3.74259	0.972406	3.8488	0.0001187	0.00399116	OE9A118212	ID=OE9A118212T1;Parent=OE9A118212;Name=OE9A118212T1;product=OE9A118212P1
OE9A004162	292.959	3.73377	0.462395	8.07486	6.75563e-16	1.27531e-13	OE9A004162	ID=OE9A004162T2;Parent=OE9A004162;Name=OE9A004162T2;product=OE9A004162P1;Description=probable WRKY transcription factor 23;Ontology_term=GO:0003700%2C GO:0005667%2C GO:0006355%2C GO:0043565%2C GO:0045449
OE9A031635	6501.22	3.732	0.416148	8.96797	3.02036e-19	9.00616e-17	OE9A031635	ID=OE9A031635T1;Parent=OE9A031635;Name=OE9A031635T1;product=OE9A031635P1
OE9A005635	20.9262	3.73044	1.33513	2.79406	0.00520512	0.0929131	OE9A005635	ID=OE9A005635T1;Parent=OE9A005635;Name=OE9A005635T1;product=OE9A005635P1
OE9A008141	148.034	3.72474	0.901978	4.12953	3.63508e-05	0.0014152	OE9A008141	ID=OE9A008141T1;Parent=OE9A008141;Name=OE9A008141T1;product=OE9A008141P1;Description=xyloglucan endotransglucosylase hydrolase 2-like;Ontology_term=GO:0004553%2C GO:0005618%2C GO:0010411%2C GO:0016762%2C GO:0042546%2C GO:0048046
OE9A091582	36.9204	3.72069	0.744409	4.99818	5.78751e-07	3.30859e-05	OE9A091582	ID=OE9A091582T1;Parent=OE9A091582;Name=OE9A091582T1;product=OE9A091582P1;Description=U-box domain-containing 4-like;Ontology_term=GO:0005515%2C GO:0005634%2C GO:0005737
OE9A121172	1280.23	3.69613	0.370287	9.9818	1.83116e-23	8.89806e-21	OE9A121172	ID=OE9A121172T1;Parent=OE9A121172;Name=OE9A121172T1;product=OE9A121172P1;Description=tetraspanin-8-like;Ontology_term=GO:0006811%2C GO:0016021
OE9A033630	2209.97	3.68416	0.408934	9.00917	2.07613e-19	6.40913e-17	OE9A033630	ID=OE9A033630T1;Parent=OE9A033630;Name=OE9A033630T1;product=OE9A033630P1;Description=probable galacturonosyltransferase-like 9;Ontology_term=GO:0016757
OE9A065734	1222.82	3.67599	0.323526	11.3623	6.4447e-30	7.35256e-27	OE9A065734	ID=OE9A065734T1;Parent=OE9A065734;Name=OE9A065734T1;product=OE9A065734P1;Description=RING-H2 finger ATL3-like;Ontology_term=GO:0005515%2C GO:0008270%2C GO:0044267
OE9A025047	149.032	3.67315	0.40823	8.99774	2.30415e-19	7.03033e-17	OE9A025047	ID=OE9A025047T1;Parent=OE9A025047;Name=OE9A025047T1;product=OE9A025047P1
OE9A078564	277.177	3.66821	1.0602	3.45993	0.000540311	0.0153772	OE9A078564	ID=OE9A078564T1;Parent=OE9A078564;Name=OE9A078564T1;product=OE9A078564P1;Description=monothiol glutaredoxin-S2-like;Ontology_term=GO:0005623%2C GO:0006118%2C GO:0009055%2C GO:0015035%2C GO:0016021%2C GO:0045454%2C GO:0055114
OE9A003527	68.0473	3.65427	0.569179	6.42025	1.36053e-10	1.30293e-08	OE9A003527	ID=OE9A003527T1;Parent=OE9A003527;Name=OE9A003527T1;product=OE9A003527P1;Description=uncharacterized N-acetyltransferase p20-like;Ontology_term=GO:0006474%2C GO:0008080%2C GO:0016020%2C GO:0042967
OE9A101051	119.321	3.63687	0.514953	7.06253	1.63492e-12	2.12378e-10	OE9A101051	ID=OE9A101051T1;Parent=OE9A101051;Name=OE9A101051T1;product=OE9A101051P1
OE9A004806	56.074	3.63347	0.584959	6.2115	5.24823e-10	4.66825e-08	OE9A004806	ID=OE9A004806T1;Parent=OE9A004806;Name=OE9A004806T1;product=OE9A004806P1
OE9A012024	169.823	3.63225	0.397323	9.1418	6.14185e-20	2.12056e-17	OE9A012024	ID=OE9A012024T1;Parent=OE9A012024;Name=OE9A012024T1;product=OE9A012024P1
OE9A055836	43.6731	3.62262	0.735677	4.92421	8.47024e-07	4.67914e-05	OE9A055836	ID=OE9A055836T1;Parent=OE9A055836;Name=OE9A055836T1;product=OE9A055836P1;Description=late embryogenesis abundant At1g64065-like;Ontology_term=GO:0016020
OE9A068607	1573.27	3.62243	0.448753	8.07221	6.90348e-16	1.29391e-13	OE9A068607	ID=OE9A068607T1;Parent=OE9A068607;Name=OE9A068607T1;product=OE9A068607P1;Description=calcium-binding PBP1-like;Ontology_term=GO:0005509
OE9A083942	47.3596	3.60653	0.540637	6.67089	2.54256e-11	2.75689e-09	OE9A083942	ID=OE9A083942T1;Parent=OE9A083942;Name=OE9A083942T1;product=OE9A083942P1;Description=ALA-interacting subunit 1-like;Ontology_term=GO:0016021
OE9A091582	11.0347	3.60398	0.993049	3.6292	0.000284297	0.0086442	OE9A091582	ID=OE9A091582T1;Parent=OE9A091582;Name=OE9A091582T1;product=OE9A091582P1;Description=U-box domain-containing 4-like;Ontology_term=GO:0005515%2C GO:0005634%2C GO:0005737
OE9A107194	106.325	3.59486	0.527743	6.81176	9.6409e-12	1.12936e-09	OE9A107194	ID=OE9A107194T1;Parent=OE9A107194;Name=OE9A107194T1;product=OE9A107194P1
OE9A023040	374.392	3.59439	0.498236	7.21422	5.42428e-13	7.73549e-11	OE9A023040	ID=OE9A023040T1;Parent=OE9A023040;Name=OE9A023040T1;product=OE9A023040P1;Description=Mediator of RNA polymerase II transcription subunit 18,;Ontology_term=GO:0016021
OE9A121276	10449.9	3.57091	0.554468	6.44024	1.19284e-10	1.16358e-08	OE9A121276	ID=OE9A121276T1;Parent=OE9A121276;Name=OE9A121276T1;product=OE9A121276P1;Description=SENESCENCE-ASSOCIATED GENE 21, mitochondrial-like;Ontology_term=GO:0006950
OE9A089257	787.591	3.56786	0.403993	8.83148	1.033e-18	2.88362e-16	OE9A089257	ID=OE9A089257T1;Parent=OE9A089257;Name=OE9A089257T1;product=OE9A089257P1;Description=probable calcium-binding CML45;Ontology_term=GO:0005509
OE9A067165	561.395	3.56288	0.318119	11.1998	4.08514e-29	3.82836e-26	OE9A067165	ID=OE9A067165T1;Parent=OE9A067165;Name=OE9A067165T1;product=OE9A067165P1;Description=Serine threonine kinase;Ontology_term=GO:0004672%2C GO:0005524%2C GO:0006468
OE9A116623	58.67	3.55841	0.755169	4.71207	2.45211e-06	0.000121402	OE9A116623	ID=OE9A116623T1;Parent=OE9A116623;Name=OE9A116623T1;product=OE9A116623P1;Description=7-deoxyloganetic acid UDP-glucosyltransferase;Ontology_term=GO:0035251%2C GO:1900994
OE9A011881	51.6531	3.51944	0.504051	6.98231	2.90363e-12	3.6986e-10	OE9A011881	ID=OE9A011881T1;Parent=OE9A011881;Name=OE9A011881T1;product=OE9A011881P1;Description=pleiotropic drug resistance 1-like;Ontology_term=GO:0005524%2C GO:0005886%2C GO:0016021%2C GO:0042626%2C GO:0055085
OE9A005711	188.375	3.5157	0.479957	7.32504	2.38828e-13	3.5207e-11	OE9A005711	ID=OE9A005711T1;Parent=OE9A005711;Name=OE9A005711T1;product=OE9A005711P1;Description=tetraspanin-8-like;Ontology_term=GO:0016021
OE9A075408	467.471	3.5047	0.387695	9.03982	1.56924e-19	4.902e-17	OE9A075408	ID=OE9A075408T1;Parent=OE9A075408;Name=OE9A075408T1;product=OE9A075408P1;Description=syntaxin-121-like;Ontology_term=GO:0000149%2C GO:0005484%2C GO:0005886%2C GO:0006886%2C GO:0006887%2C GO:0006906%2C GO:0012505%2C GO:0016021%2C GO:0031201%2C GO:0048278
OE9A079911	872.18	3.50011	0.616309	5.67916	1.3536e-08	9.7045e-07	OE9A079911	ID=OE9A079911T1;Parent=OE9A079911;Name=OE9A079911T1;product=OE9A079911P1;Description=ethylene-responsive transcription factor ERF109-like;Ontology_term=GO:0003677%2C GO:0003700%2C GO:0005667%2C GO:0006355%2C GO:0045449
OE9A071927	168.115	3.49847	0.408037	8.57391	1.00028e-17	2.43031e-15	OE9A071927	ID=OE9A071927T1;Parent=OE9A071927;Name=OE9A071927T1;product=OE9A071927P1;Description=uncharacterized protein LOC111407381;Ontology_term=GO:0005515%2C GO:0008270
OE9A053553	29.2327	3.49492	0.880727	3.96823	7.24089e-05	0.00259919	OE9A053553	ID=OE9A053553T1;Parent=OE9A053553;Name=OE9A053553T1;product=OE9A053553P1
OE9A080031	16.2896	3.45862	0.97763	3.53776	0.00040354	0.0118577	OE9A080031	ID=OE9A080031T1;Parent=OE9A080031;Name=OE9A080031T1;product=OE9A080031P1;Description=phospholipase D alpha 1;Ontology_term=GO:0004630%2C GO:0005509%2C GO:0005515%2C GO:0005773%2C GO:0005783%2C GO:0005886%2C GO:0009395%2C GO:0009536%2C GO:0046470%2C GO:0070290
OE9A103265	1810.15	3.45748	0.373899	9.2471	2.30667e-20	8.2917e-18	OE9A103265	ID=OE9A103265T1;Parent=OE9A103265;Name=OE9A103265T1;product=OE9A103265P1;Description=probable calcium-binding CML45;Ontology_term=GO:0005509
OE9A110673	817.196	3.42905	0.307175	11.1632	6.17394e-29	5.58636e-26	OE9A110673	ID=OE9A110673T1;Parent=OE9A110673;Name=OE9A110673T1;product=OE9A110673P1;Description=FT-interacting 1;Ontology_term=GO:0005515%2C GO:0016021
OE9A016793	8378.82	3.42741	0.360007	9.52039	1.72526e-21	7.18584e-19	OE9A016793	ID=OE9A016793T1;Parent=OE9A016793;Name=OE9A016793T1;product=OE9A016793P1;Description=E3 ubiquitin- ligase RING1;Ontology_term=GO:0005515%2C GO:0008270
OE9A099186	137.994	3.42083	0.590605	5.79208	6.95218e-09	5.2421e-07	OE9A099186	ID=OE9A099186T1;Parent=OE9A099186;Name=OE9A099186T1;product=OE9A099186P1;Description=zinc finger ZAT10-like;Ontology_term=GO:0003676%2C GO:0046872
OE9A116163	71.0889	3.42006	0.501851	6.81488	9.43418e-12	1.11849e-09	OE9A116163	ID=OE9A116163T1;Parent=OE9A116163;Name=OE9A116163T1;product=OE9A116163P1;Description=E3 ubiquitin- ligase PUB23-like;Ontology_term=GO:0004842%2C GO:0005488%2C GO:0016567
OE9A113289	974.526	3.41545	0.377218	9.05431	1.37432e-19	4.45211e-17	OE9A113289	ID=OE9A113289T1;Parent=OE9A113289;Name=OE9A113289T1;product=OE9A113289P1;Description=probable E3 ubiquitin- ligase XERICO;Ontology_term=GO:0005515%2C GO:0008270%2C GO:0016020
OE9A040224	31.8083	3.41036	1.05535	3.23149	0.00123146	0.0306579	OE9A040224	ID=OE9A040224T1;Parent=OE9A040224;Name=OE9A040224T1;product=OE9A040224P1;Description=aluminum-activated malate transporter 2-like;Ontology_term=GO:0009705%2C GO:0015140%2C GO:0016021%2C GO:0071423
OE9A002541	16847.3	3.41009	0.427949	7.96846	1.60658e-15	2.92755e-13	OE9A002541	ID=OE9A002541T1;Parent=OE9A002541;Name=OE9A002541T1;product=OE9A002541P1
OE9A093962	86.5747	3.41	0.501172	6.80406	1.01715e-11	1.18622e-09	OE9A093962	ID=OE9A093962T1;Parent=OE9A093962;Name=OE9A093962T1;product=OE9A093962P1
OE9A087862	18.0428	3.3983	1.2137	2.79996	0.00511093	0.0917311	OE9A087862	ID=OE9A087862T1;Parent=OE9A087862;Name=OE9A087862T1;product=OE9A087862P1;Description=DNA RNA polymerases superfamily;Ontology_term=GO:0003676%2C GO:0004190%2C GO:0006508%2C GO:0008270%2C GO:0015074
OE9A006285	15.0031	3.39718	0.887589	3.82743	0.00012949	0.00431742	OE9A006285	ID=OE9A006285T1;Parent=OE9A006285;Name=OE9A006285T1;product=OE9A006285P1;Description=FT-interacting 1-like;Ontology_term=GO:0005515%2C GO:0016021
OE9A110486	19.6346	3.38251	0.857981	3.94241	8.06658e-05	0.00284117	OE9A110486	ID=OE9A110486T1;Parent=OE9A110486;Name=OE9A110486T1;product=OE9A110486P1;Description=crocetin glucosyltransferase, chloroplastic-like;Ontology_term=GO:0008152%2C GO:0016758
OE9A090698	7832.35	3.36392	0.407937	8.24617	1.63547e-16	3.35271e-14	OE9A090698	ID=OE9A090698T1;Parent=OE9A090698;Name=OE9A090698T1;product=OE9A090698P1;Description=mitochondrial uncoupling 5-like;Ontology_term=GO:0003735%2C GO:0005840%2C GO:0006412%2C GO:0006839%2C GO:0016021%2C GO:0031966%2C GO:0042254
OE9A039140	850.88	3.3561	0.371203	9.04116	1.55015e-19	4.90071e-17	OE9A039140	ID=OE9A039140T1;Parent=OE9A039140;Name=OE9A039140T1;product=OE9A039140P1;Description=probable calcium-binding CML45;Ontology_term=GO:0005509
OE9A051211	246.02	3.35547	0.73789	4.54738	5.43172e-06	0.00025497	OE9A051211	ID=OE9A051211T1;Parent=OE9A051211;Name=OE9A051211T1;product=OE9A051211P1;Description=beta-glucosidase-like;Ontology_term=GO:0004553%2C GO:0005975
OE9A097302	145.949	3.35193	0.42922	7.80936	5.74811e-15	9.92305e-13	OE9A097302	ID=OE9A097302T1;Parent=OE9A097302;Name=OE9A097302T1;product=OE9A097302P1;Description=uncharacterized protein LOC111407381;Ontology_term=GO:0005515%2C GO:0008270
OE9A020664	57.2888	3.33962	0.603512	5.53365	3.13628e-08	2.16e-06	OE9A020664	ID=OE9A020664T1;Parent=OE9A020664;Name=OE9A020664T1;product=OE9A020664P1
OE9A052076	331.666	3.33323	0.39075	8.53033	1.45926e-17	3.38858e-15	OE9A052076	ID=OE9A052076T1;Parent=OE9A052076;Name=OE9A052076T1;product=OE9A052076P1;Description=syntaxin-121-like;Ontology_term=GO:0000149%2C GO:0005484%2C GO:0005886%2C GO:0006886%2C GO:0006887%2C GO:0006906%2C GO:0012505%2C GO:0016021%2C GO:0031201%2C GO:0048278
OE9A089731	464.046	3.30894	0.336237	9.8411	7.48873e-23	3.50901e-20	OE9A089731	ID=OE9A089731T1;Parent=OE9A089731;Name=OE9A089731T1;product=OE9A089731P1;Description=scarecrow 21;Ontology_term=GO:0006355
OE9A052930	8.66027	3.30665	1.00727	3.28279	0.00102786	0.0263748	OE9A052930	ID=OE9A052930T1;Parent=OE9A052930;Name=OE9A052930T1;product=OE9A052930P1;Description=VAN3-binding isoform X1;Ontology_term=GO:0005886
OE9A113952	19.2114	3.29926	0.704225	4.68495	2.80029e-06	0.000137089	OE9A113952	ID=OE9A113952T1;Parent=OE9A113952;Name=OE9A113952T1;product=OE9A113952P1;Description=NRT1 PTR FAMILY -like;Ontology_term=GO:0005215%2C GO:0006810%2C GO:0016021
OE9A107099	20.6951	3.29762	0.756207	4.36073	1.2963e-05	0.000558538	OE9A107099	ID=OE9A107099T1;Parent=OE9A107099;Name=OE9A107099T1;product=OE9A107099P1;Description=acetyl- acetyltransferase, cytosolic 1;Ontology_term=GO:0008152%2C GO:0016747
OE9A002219	1925.38	3.29564	0.571634	5.76529	8.15172e-09	6.04241e-07	OE9A002219	ID=OE9A002219T1;Parent=OE9A002219;Name=OE9A002219T1;product=OE9A002219P1;Description=ethylene-responsive transcription factor ERF017-like;Ontology_term=GO:0003677%2C GO:0003700%2C GO:0005667%2C GO:0006355%2C GO:0045449
OE9A009638	690.614	3.29432	0.363507	9.06261	1.27368e-19	4.17768e-17	OE9A009638	ID=OE9A009638T1;Parent=OE9A009638;Name=OE9A009638T1;product=OE9A009638P1;Description=phosphatidylinositol:ceramide inositolphosphotransferase 2-like;Ontology_term=GO:0016021
OE9A017749	75.0037	3.27492	0.663167	4.93831	7.88009e-07	4.3901e-05	OE9A017749	ID=OE9A017749T1;Parent=OE9A017749;Name=OE9A017749T1;product=OE9A017749P1
OE9A109323	110.899	3.27484	0.660603	4.95735	7.14617e-07	4.01532e-05	OE9A109323	ID=OE9A109323T1;Parent=OE9A109323;Name=OE9A109323T1;product=OE9A109323P1;Description=Serine threonine kinase;Ontology_term=GO:0004674%2C GO:0005509%2C GO:0005515%2C GO:0005524%2C GO:0006468%2C GO:0009069%2C GO:0016021%2C GO:0030247
OE9A010853	66.827	3.27398	1.04789	3.12436	0.00178192	0.0412325	OE9A010853	ID=OE9A010853T1;Parent=OE9A010853;Name=OE9A010853T1;product=OE9A010853P1;Description=F-box At3g07870-like;Ontology_term=GO:0005515
OE9A096223	105.835	3.26818	0.535336	6.10491	1.02857e-09	8.7629e-08	OE9A096223	ID=OE9A096223T1;Parent=OE9A096223;Name=OE9A096223T1;product=OE9A096223P1;Description=ethylene-responsive transcription factor ERF017-like;Ontology_term=GO:0003677%2C GO:0003700%2C GO:0005667%2C GO:0006355%2C GO:0045449
OE9A033879	95.2809	3.26138	0.63708	5.11926	3.06738e-07	1.83344e-05	OE9A033879	ID=OE9A033879T1;Parent=OE9A033879;Name=OE9A033879T1;product=OE9A033879P1;Description=ethylene-responsive transcription factor ERF109-like;Ontology_term=GO:0003677%2C GO:0003700%2C GO:0005667%2C GO:0006355%2C GO:0045449
OE9A102745	41.5389	3.25473	0.654727	4.97113	6.6564e-07	3.75621e-05	OE9A102745	ID=OE9A102745T1;Parent=OE9A102745;Name=OE9A102745T1;product=OE9A102745P1;Description=clathrin assembly At1g03050;Ontology_term=GO:0005545%2C GO:0030136%2C GO:0030276%2C GO:0048268
OE9A064506	1376.56	3.24869	0.393734	8.25098	1.57099e-16	3.2459e-14	OE9A064506	ID=OE9A064506T1;Parent=OE9A064506;Name=OE9A064506T1;product=OE9A064506P1;Description=COBRA 7;Ontology_term=GO:0010215%2C GO:0016021%2C GO:0016049%2C GO:0031225
OE9A118289	45.1642	3.23379	0.600371	5.38631	7.1918e-08	4.77754e-06	OE9A118289	ID=OE9A118289T1;Parent=OE9A118289;Name=OE9A118289T1;product=OE9A118289P1;Description=cytochrome P450 81F3-like;Ontology_term=GO:0005506%2C GO:0016021%2C GO:0020037%2C GO:0033773%2C GO:0042343%2C GO:0044550%2C GO:0055114%2C GO:0098542
OE9A063618	25.0682	3.20925	0.655363	4.8969	9.73627e-07	5.28944e-05	OE9A063618	ID=OE9A063618T1;Parent=OE9A063618;Name=OE9A063618T1;product=OE9A063618P1;Description=poly(U)-specific endoribonuclease-B-like;Ontology_term=GO:0016788
OE9A115883	1235.22	3.20282	0.391261	8.1859	2.70287e-16	5.25358e-14	OE9A115883	ID=OE9A115883T1;Parent=OE9A115883;Name=OE9A115883T1;product=OE9A115883P1;Description=calcium-binding CML19;Ontology_term=GO:0005509
OE9A068770	247.796	3.1914	0.240714	13.258	4.05331e-40	1.77265e-36	OE9A068770	ID=OE9A068770T1;Parent=OE9A068770;Name=OE9A068770T1;product=OE9A068770P1;Description=lipid phosphate phosphatase epsilon 2, chloroplastic-like;Ontology_term=GO:0006651%2C GO:0006687%2C GO:0008195%2C GO:0009395%2C GO:0009507%2C GO:0016020
OE9A071883	38.3984	3.1854	0.802632	3.96869	7.22679e-05	0.00259768	OE9A071883	ID=OE9A071883T1;Parent=OE9A071883;Name=OE9A071883T1;product=OE9A071883P1
OE9A005875	503.353	3.18008	0.428066	7.42894	1.09468e-13	1.68967e-11	OE9A005875	ID=OE9A005875T1;Parent=OE9A005875;Name=OE9A005875T1;product=OE9A005875P1;Description=dehydration-responsive element-binding 1E-like;Ontology_term=GO:0003677%2C GO:0003700%2C GO:0005634%2C GO:0005667%2C GO:0006355%2C GO:0045449
OE9A002858	2368.33	3.17591	0.373063	8.51307	1.69387e-17	3.86497e-15	OE9A002858	ID=OE9A002858T1;Parent=OE9A002858;Name=OE9A002858T1;product=OE9A002858P1;Description=UDP-glucose 6-dehydrogenase 2-like;Ontology_term=GO:0003979%2C GO:0005982%2C GO:0005985%2C GO:0009117%2C GO:0051287%2C GO:0055114
OE9A104316	5998.19	3.17211	0.295348	10.7402	6.58718e-27	4.43199e-24	OE9A104316	ID=OE9A104316T1;Parent=OE9A104316;Name=OE9A104316T1;product=OE9A104316P1;Description=scarecrow 13;Ontology_term=GO:0003700%2C GO:0005634%2C GO:0005667%2C GO:0006355%2C GO:0043565%2C GO:0045449
OE9A002619	70.794	3.17172	0.928517	3.4159	0.00063572	0.0175408	OE9A002619	ID=OE9A002619T1;Parent=OE9A002619;Name=OE9A002619T1;product=OE9A002619P1;Description=E3 ubiquitin- ligase PUB23-like;Ontology_term=GO:0004842%2C GO:0005488%2C GO:0016567
OE9A057709	901.383	3.16366	0.828146	3.82017	0.00013336	0.00442396	OE9A057709	ID=OE9A057709T3;Parent=OE9A057709;Name=OE9A057709T3;product=OE9A057709P1;Description=F-box kelch-repeat SKIP11-like;Ontology_term=GO:0005515
OE9A039596	31.6291	3.15381	0.722323	4.3662	1.26426e-05	0.000550154	OE9A039596	ID=OE9A039596T1;Parent=OE9A039596;Name=OE9A039596T1;product=OE9A039596P1;Description=Serine threonine kinase;Ontology_term=GO:0004672%2C GO:0005509%2C GO:0005515%2C GO:0005524%2C GO:0006468%2C GO:0030247
OE9A063822	1072.35	3.15355	0.369402	8.53691	1.37853e-17	3.28842e-15	OE9A063822	ID=OE9A063822T1;Parent=OE9A063822;Name=OE9A063822T1;product=OE9A063822P1;Description=CBL-interacting serine threonine- kinase 14-like;Ontology_term=GO:0004674%2C GO:0005524%2C GO:0006468%2C GO:0007165%2C GO:0009069
OE9A048783	9.61802	3.1464	0.990771	3.17571	0.00149468	0.0357851	OE9A048783	ID=OE9A048783T1;Parent=OE9A048783;Name=OE9A048783T1;product=OE9A048783P1;Description=diacylglycerol kinase 2;Ontology_term=GO:0004143%2C GO:0005524%2C GO:0005622%2C GO:0007205%2C GO:0009395%2C GO:0016021%2C GO:0016310%2C GO:0035556%2C GO:0046486%2C GO:0048364%2C GO:0048366
OE9A009188	12.3786	3.14146	0.981047	3.20216	0.00136403	0.0331717	OE9A009188	ID=OE9A009188T1;Parent=OE9A009188;Name=OE9A009188T1;product=OE9A009188P1;Description=phosphatidylinositol 4-kinase gamma 4-like;Ontology_term=GO:0005515%2C GO:0016301%2C GO:0016310
OE9A092877	29.186	3.12706	0.692216	4.51746	6.25861e-06	0.00028964	OE9A092877	ID=OE9A092877T1;Parent=OE9A092877;Name=OE9A092877T1;product=OE9A092877P1;Description=probable phosphatase 2C 73;Ontology_term=GO:0004722%2C GO:0006470%2C GO:0008287
OE9A044804	5994.18	3.1252	0.879021	3.55532	0.00037752	0.0111681	OE9A044804	ID=OE9A044804T1;Parent=OE9A044804;Name=OE9A044804T1;product=OE9A044804P1;Description=pathogenesis-related R major form;Ontology_term=GO:0005576%2C GO:0005773%2C GO:0006952%2C GO:0009607
OE9A096579	18.1904	3.11398	0.78604	3.9616	7.44484e-05	0.00265786	OE9A096579	ID=OE9A096579T1;Parent=OE9A096579;Name=OE9A096579T1;product=OE9A096579P1;Description=GDSL esterase lipase At5g55050-like;Ontology_term=GO:0016788
OE9A097447	173.287	3.10938	0.378362	8.218	2.06921e-16	4.08356e-14	OE9A097447	ID=OE9A097447T1;Parent=OE9A097447;Name=OE9A097447T1;product=OE9A097447P1;Description=phosphoglycerate mutase AT74H;Ontology_term=GO:0005829%2C GO:0015976%2C GO:0016311%2C GO:0050278
OE9A060030	9.22918	3.10798	1.02184	3.04157	0.0023535	0.0514097	OE9A060030	ID=OE9A060030T1;Parent=OE9A060030;Name=OE9A060030T1;product=OE9A060030P1;Description=scarecrow 4;Ontology_term=GO:0003700%2C GO:0005634%2C GO:0005667%2C GO:0006355%2C GO:0043565%2C GO:0045449
OE9A108402	392.139	3.10563	0.36279	8.5604	1.12478e-17	2.70774e-15	OE9A108402	ID=OE9A108402T1;Parent=OE9A108402;Name=OE9A108402T1;product=OE9A108402P1;Description=probable WRKY transcription factor 46;Ontology_term=GO:0003700%2C GO:0005667%2C GO:0006355%2C GO:0043565%2C GO:0045449
OE9A028561	15.0144	3.10062	0.891592	3.47762	0.000505885	0.0145234	OE9A028561	ID=OE9A028561T1;Parent=OE9A028561;Name=OE9A028561T1;product=OE9A028561P1;Description=mitogen-activated kinase kinase kinase YODA-like;Ontology_term=GO:0004672%2C GO:0005524%2C GO:0006468
OE9A082944	215.753	3.09416	0.353651	8.74919	2.1489e-18	5.69568e-16	OE9A082944	ID=OE9A082944T1;Parent=OE9A082944;Name=OE9A082944T1;product=OE9A082944P1;Description=Serine threonine kinase;Ontology_term=GO:0004672%2C GO:0005524%2C GO:0006468
OE9A082695	44.6047	3.0887	0.554607	5.56917	2.55955e-08	1.7721e-06	OE9A082695	ID=OE9A082695T1;Parent=OE9A082695;Name=OE9A082695T1;product=OE9A082695P1;Description=RHOMBOID 2;Ontology_term=GO:0004252%2C GO:0016021%2C GO:0016485
OE9A120192	355.272	3.08071	0.408481	7.54187	4.63282e-14	7.36758e-12	OE9A120192	ID=OE9A120192T1;Parent=OE9A120192;Name=OE9A120192T1;product=OE9A120192P1
OE9A060701	131.507	3.07978	0.449404	6.85303	7.23011e-12	8.74277e-10	OE9A060701	ID=OE9A060701T1;Parent=OE9A060701;Name=OE9A060701T1;product=OE9A060701P1;Description=Spindle pole body;Ontology_term=GO:0015031
OE9A024350	245.631	3.07766	0.537464	5.72626	1.02667e-08	7.4833e-07	OE9A024350	ID=OE9A024350T1;Parent=OE9A024350;Name=OE9A024350T1;product=OE9A024350P1
OE9A007653	195.256	3.07386	0.957387	3.21068	0.00132421	0.0323834	OE9A007653	ID=OE9A007653T1;Parent=OE9A007653;Name=OE9A007653T1;product=OE9A007653P1;Description=monothiol glutaredoxin-S2-like;Ontology_term=GO:0005623%2C GO:0006118%2C GO:0009055%2C GO:0015035%2C GO:0016021%2C GO:0045454%2C GO:0055114
OE9A077003	64.2862	3.07228	0.758081	4.05271	5.06286e-05	0.00189244	OE9A077003	ID=OE9A077003T1;Parent=OE9A077003;Name=OE9A077003T1;product=OE9A077003P1;Description=NUCLEAR FUSION DEFECTIVE 4-like;Ontology_term=GO:0016021%2C GO:0055085
OE9A041553	462.253	3.06665	0.320263	9.57542	1.01442e-21	4.29327e-19	OE9A041553	ID=OE9A041553T1;Parent=OE9A041553;Name=OE9A041553T1;product=OE9A041553P1;Description=two-component response regulator ARR5-like;Ontology_term=GO:0000160%2C GO:0005622
OE9A026649	52.243	3.066	0.472621	6.48721	8.74378e-11	8.75713e-09	OE9A026649	ID=OE9A026649T1;Parent=OE9A026649;Name=OE9A026649T1;product=OE9A026649P1;Description=UDP-galactose UDP-glucose transporter 2-like;Ontology_term=GO:0008643%2C GO:0030173%2C GO:0030176%2C GO:0046964%2C GO:1902559
OE9A074891	1209.56	3.06516	0.367824	8.33322	7.8676e-17	1.72038e-14	OE9A074891	ID=OE9A074891T1;Parent=OE9A074891;Name=OE9A074891T1;product=OE9A074891P1;Description=CBL-interacting serine threonine- kinase 14-like;Ontology_term=GO:0004674%2C GO:0005524%2C GO:0006468%2C GO:0007165%2C GO:0009069
OE9A081134	4231.96	3.0597	0.214644	14.2548	4.18641e-46	2.74628e-42	OE9A081134	ID=OE9A081134T1;Parent=OE9A081134;Name=OE9A081134T1;product=OE9A081134P1;Description=probable WRKY transcription factor 46;Ontology_term=GO:0003700%2C GO:0005667%2C GO:0006355%2C GO:0043565%2C GO:0045449
OE9A098086	307.794	3.04868	0.415502	7.33734	2.17877e-13	3.24835e-11	OE9A098086	ID=OE9A098086T1;Parent=OE9A098086;Name=OE9A098086T1;product=OE9A098086P1;Description=heavy metal-associated isoprenylated plant 3-like;Ontology_term=GO:0030001%2C GO:0046872
OE9A120487	1021.19	3.04742	0.298457	10.2106	1.77761e-24	9.51928e-22	OE9A120487	ID=OE9A120487T1;Parent=OE9A120487;Name=OE9A120487T1;product=OE9A120487P1;Description=syntaxin-121-like;Ontology_term=GO:0000149%2C GO:0005484%2C GO:0005886%2C GO:0006886%2C GO:0006887%2C GO:0006906%2C GO:0012505%2C GO:0016021%2C GO:0031201%2C GO:0048278
OE9A039352	17.1416	3.04423	1.00282	3.03568	0.00239991	0.0521864	OE9A039352	ID=OE9A039352T1;Parent=OE9A039352;Name=OE9A039352T1;product=OE9A039352P1
OE9A103755	1865.53	3.02867	0.324089	9.34519	9.17239e-21	3.48817e-18	OE9A103755	ID=OE9A103755T1;Parent=OE9A103755;Name=OE9A103755T1;product=OE9A103755P1;Description=ethylene-responsive transcription factor 5-like;Ontology_term=GO:0003677%2C GO:0003700%2C GO:0005667%2C GO:0006355%2C GO:0045449
OE9A095768	4904.69	3.02451	0.442149	6.84048	7.89287e-12	9.45703e-10	OE9A095768	ID=OE9A095768T1;Parent=OE9A095768;Name=OE9A095768T1;product=OE9A095768P1;Description=mitochondrial uncoupling 5-like;Ontology_term=GO:0003735%2C GO:0005840%2C GO:0006412%2C GO:0006839%2C GO:0016021%2C GO:0031966%2C GO:0042254%2C GO:0055085
OE9A001711	138.445	3.02049	0.954116	3.16575	0.00154682	0.0367651	OE9A001711	ID=OE9A001711T1;Parent=OE9A001711;Name=OE9A001711T1;product=OE9A001711P1;Description=berberine bridge enzyme-like 18;Ontology_term=GO:0016614%2C GO:0050660%2C GO:0055114
OE9A064741	15.2478	3.01649	0.967728	3.11709	0.00182648	0.0419664	OE9A064741	ID=OE9A064741T1;Parent=OE9A064741;Name=OE9A064741T1;product=OE9A064741P1;Description=transmembrane 45B-like;Ontology_term=GO:0016020
OE9A048783	208.104	3.0157	0.377692	7.98456	1.41019e-15	2.60587e-13	OE9A048783	ID=OE9A048783T1;Parent=OE9A048783;Name=OE9A048783T1;product=OE9A048783P1;Description=diacylglycerol kinase 2;Ontology_term=GO:0004143%2C GO:0005524%2C GO:0005622%2C GO:0007205%2C GO:0009395%2C GO:0016021%2C GO:0016310%2C GO:0035556%2C GO:0046486%2C GO:0048364%2C GO:0048366
OE9A038398	7134.95	3.01446	0.447524	6.73586	1.62966e-11	1.83529e-09	OE9A038398	ID=OE9A038398T1;Parent=OE9A038398;Name=OE9A038398T1;product=OE9A038398P1;Description=SENESCENCE-ASSOCIATED GENE 21, mitochondrial-like;Ontology_term=GO:0006950
OE9A019561	866.782	3.00963	0.234692	12.8238	1.20713e-37	3.51947e-34	OE9A019561	ID=OE9A019561T1;Parent=OE9A019561;Name=OE9A019561T1;product=OE9A019561P1
OE9A050619	10.7109	3.00272	0.928087	3.23539	0.00121476	0.0303574	OE9A050619	ID=OE9A050619T1;Parent=OE9A050619;Name=OE9A050619T1;product=OE9A050619P1;Description=7-deoxyloganetic acid UDP-glucosyltransferase;Ontology_term=GO:0035251%2C GO:1900994
OE9A032354	4053.55	3.00087	0.361731	8.29586	1.07798e-16	2.29969e-14	OE9A032354	ID=OE9A032354T1;Parent=OE9A032354;Name=OE9A032354T1;product=OE9A032354P1;Description=heavy metal-associated isoprenylated plant 3-like;Ontology_term=GO:0030001%2C GO:0046872
OE9A101335	71.7968	2.99843	0.771932	3.88431	0.00010262	0.00351993	OE9A101335	ID=OE9A101335T1;Parent=OE9A101335;Name=OE9A101335T1;product=OE9A101335P1;Description=E3 ubiquitin- ligase PUB23-like;Ontology_term=GO:0004842%2C GO:0005488%2C GO:0016567
OE9A080338	504.467	2.99523	0.266805	11.2263	3.02894e-29	2.94368e-26	OE9A080338	ID=OE9A080338T1;Parent=OE9A080338;Name=OE9A080338T1;product=OE9A080338P1
OE9A002141	24.9973	2.9881	0.977513	3.05684	0.00223686	0.0494483	OE9A002141	ID=OE9A002141T2;Parent=OE9A002141;Name=OE9A002141T2;product=OE9A002141P2;Description=squalene synthase;Ontology_term=GO:0004310%2C GO:0006694%2C GO:0016021%2C GO:0016114%2C GO:0051996
OE9A043482	95.5586	2.97681	0.408865	7.28067	3.32164e-13	4.84221e-11	OE9A043482	ID=OE9A043482T1;Parent=OE9A043482;Name=OE9A043482T1;product=OE9A043482P1;Description=glutamyl-tRNA reductase 1, chloroplastic-like;Ontology_term=GO:0006782%2C GO:0008883%2C GO:0009507%2C GO:0015995%2C GO:0050661%2C GO:0055114
OE9A060709	146.786	2.97641	0.441955	6.73464	1.64331e-11	1.83963e-09	OE9A060709	ID=OE9A060709T1;Parent=OE9A060709;Name=OE9A060709T1;product=OE9A060709P1
OE9A008777	3378.28	2.97064	0.349386	8.50246	1.85612e-17	4.19868e-15	OE9A008777	ID=OE9A008777T1;Parent=OE9A008777;Name=OE9A008777T1;product=OE9A008777P1;Description=heavy metal-associated isoprenylated plant 3-like;Ontology_term=GO:0030001%2C GO:0046872
OE9A015473	299.572	2.97059	0.451786	6.57521	4.85842e-11	5.03893e-09	OE9A015473	ID=OE9A015473T1;Parent=OE9A015473;Name=OE9A015473T1;product=OE9A015473P1
OE9A073161	42.9549	2.96014	0.713647	4.1479	3.35542e-05	0.001328	OE9A073161	ID=OE9A073161T1;Parent=OE9A073161;Name=OE9A073161T1;product=OE9A073161P1;Description=ethylene-responsive transcription factor ERF024;Ontology_term=GO:0003677%2C GO:0003700%2C GO:0005634%2C GO:0005667%2C GO:0006355%2C GO:0045449
OE9A004416	196.393	2.95609	0.34238	8.63395	5.9268e-18	1.49538e-15	OE9A004416	ID=OE9A004416T1;Parent=OE9A004416;Name=OE9A004416T1;product=OE9A004416P1;Description=mitogen-activated kinase kinase kinase YODA-like;Ontology_term=GO:0004702%2C GO:0005524%2C GO:0005737%2C GO:0006468%2C GO:0007178%2C GO:0009069
OE9A063541	126.55	2.95454	0.483075	6.1161	9.58915e-10	8.24981e-08	OE9A063541	ID=OE9A063541T1;Parent=OE9A063541;Name=OE9A063541T1;product=OE9A063541P1
OE9A047454	37.1546	2.94758	0.750723	3.92632	8.62545e-05	0.00300971	OE9A047454	ID=OE9A047454T1;Parent=OE9A047454;Name=OE9A047454T1;product=OE9A047454P1;Description=ethylene-responsive transcription factor ERF109-like;Ontology_term=GO:0003677%2C GO:0003700%2C GO:0005667%2C GO:0006355%2C GO:0045449
OE9A106589	364.008	2.94632	0.234056	12.5881	2.45509e-36	6.44215e-33	OE9A106589	ID=OE9A106589T1;Parent=OE9A106589;Name=OE9A106589T1;product=OE9A106589P1
OE9A065056	10.637	2.94539	0.808027	3.64516	0.000267222	0.00819148	OE9A065056	ID=OE9A065056T1;Parent=OE9A065056;Name=OE9A065056T1;product=OE9A065056P1
OE9A012368	503.473	2.9314	0.409582	7.15704	8.2439e-13	1.13257e-10	OE9A012368	ID=OE9A012368T1;Parent=OE9A012368;Name=OE9A012368T1;product=OE9A012368P1;Description=3-hydroxy-3-methylglutaryl coenzyme A reductase 1, partial;Ontology_term=GO:0004420%2C GO:0005778%2C GO:0005789%2C GO:0008299%2C GO:0015936%2C GO:0016126%2C GO:0050662%2C GO:0055114
OE9A001564	152.355	2.92599	0.429381	6.81444	9.46284e-12	1.11849e-09	OE9A001564	ID=OE9A001564T1;Parent=OE9A001564;Name=OE9A001564T1;product=OE9A001564P1;Description=probable phosphatase 2C 63;Ontology_term=GO:0004722%2C GO:0006470%2C GO:0008287%2C GO:0046872
OE9A058932	32.1558	2.92125	0.835716	3.49551	0.000473158	0.013719	OE9A058932	ID=OE9A058932T1;Parent=OE9A058932;Name=OE9A058932T1;product=OE9A058932P1;Description=transcriptional corepressor LEUNIG-like;Ontology_term=GO:0005515
OE9A064776	86.4523	2.92074	0.602809	4.84522	1.26474e-06	6.759e-05	OE9A064776	ID=OE9A064776T1;Parent=OE9A064776;Name=OE9A064776T1;product=OE9A064776P1
OE9A014923	3709.05	2.91857	0.342659	8.51742	1.63149e-17	3.75528e-15	OE9A014923	ID=OE9A014923T1;Parent=OE9A014923;Name=OE9A014923T1;product=OE9A014923P1;Description=RING-H2 finger ATL2-like;Ontology_term=GO:0005515%2C GO:0008270%2C GO:0016020
OE9A075686	14.4927	2.91119	0.954006	3.05155	0.00227667	0.0502015	OE9A075686	ID=OE9A075686T1;Parent=OE9A075686;Name=OE9A075686T1;product=OE9A075686P1;Description=E3 ubiquitin- ligase PUB23-like;Ontology_term=GO:0004842%2C GO:0005488%2C GO:0016567
OE9A048147	3253.89	2.9104	0.26977	10.7884	3.9035e-27	2.69547e-24	OE9A048147	ID=OE9A048147T1;Parent=OE9A048147;Name=OE9A048147T1;product=OE9A048147P1;Description=probable phosphatase 2C 25;Ontology_term=GO:0004722%2C GO:0006470%2C GO:0008287%2C GO:0046872
OE9A106084	8.26194	2.896	0.994831	2.91105	0.00360222	0.0708562	OE9A106084	ID=OE9A106084T1;Parent=OE9A106084;Name=OE9A106084T1;product=OE9A106084P1;Description=F-box PP2-B15-like;Ontology_term=GO:0005515
OE9A085764	1332.32	2.89426	0.31639	9.14776	5.81259e-20	2.03363e-17	OE9A085764	ID=OE9A085764T1;Parent=OE9A085764;Name=OE9A085764T1;product=OE9A085764P1;Description=probable WRKY transcription factor 46;Ontology_term=GO:0003700%2C GO:0005667%2C GO:0006355%2C GO:0043565%2C GO:0045449
OE9A106917	15.6619	2.88301	0.661637	4.35739	1.3162e-05	0.000565852	OE9A106917	ID=OE9A106917T1;Parent=OE9A106917;Name=OE9A106917T1;product=OE9A106917P1
OE9A001989	14.505	2.88219	0.965036	2.98661	0.00282088	0.0593585	OE9A001989	ID=OE9A001989T1;Parent=OE9A001989;Name=OE9A001989T1;product=OE9A001989P1;Description=U-box domain-containing 52-like isoform X1;Ontology_term=GO:0004672%2C GO:0005524%2C GO:0006468%2C GO:0006950
OE9A058819	228.404	2.87273	0.563721	5.09602	3.46874e-07	2.05e-05	OE9A058819	ID=OE9A058819T1;Parent=OE9A058819;Name=OE9A058819T1;product=OE9A058819P1;Description=AAA-ATPase ASD, mitochondrial-like;Ontology_term=GO:0005524%2C GO:0016021
OE9A044234	16.66	2.87223	0.937559	3.06352	0.0021875	0.0485208	OE9A044234	ID=OE9A044234T1;Parent=OE9A044234;Name=OE9A044234T1;product=OE9A044234P1
OE9A051863	201.623	2.86699	0.442698	6.47619	9.40702e-11	9.31473e-09	OE9A051863	ID=OE9A051863T1;Parent=OE9A051863;Name=OE9A051863T1;product=OE9A051863P1;Description=calcium-binding PBP1-like;Ontology_term=GO:0005509
OE9A085544	215.542	2.86625	0.48006	5.97061	2.36365e-09	1.92616e-07	OE9A085544	ID=OE9A085544T1;Parent=OE9A085544;Name=OE9A085544T1;product=OE9A085544P1;Description=glycerophosphodiester phosphodiesterase gdpdl4;Ontology_term=GO:0006071%2C GO:0008889%2C GO:0009395%2C GO:0016021%2C GO:0046486
OE9A052006	32.5015	2.85857	0.720544	3.96723	7.27123e-05	0.00260652	OE9A052006	ID=OE9A052006T1;Parent=OE9A052006;Name=OE9A052006T1;product=OE9A052006P1
OE9A000795	36.5648	2.85709	0.654473	4.36548	1.26847e-05	0.00055081	OE9A000795	ID=OE9A000795T1;Parent=OE9A000795;Name=OE9A000795T1;product=OE9A000795P1;Description=GATA transcription factor 8-like;Ontology_term=GO:0000785%2C GO:0000977%2C GO:0001085%2C GO:0001228%2C GO:0003682%2C GO:0005634%2C GO:0005667%2C GO:0008270%2C GO:0030154%2C GO:0045893
OE9A081748	23.032	2.85684	0.96993	2.94541	0.00322531	0.0651517	OE9A081748	ID=OE9A081748T1;Parent=OE9A081748;Name=OE9A081748T1;product=OE9A081748P1;Description=ethylene-responsive transcription factor ERF014-like;Ontology_term=GO:0003677%2C GO:0003700%2C GO:0005667%2C GO:0006355%2C GO:0045449
OE9A117672	70.8832	2.84094	0.814892	3.48628	0.000489785	0.0141075	OE9A117672	ID=OE9A117672T1;Parent=OE9A117672;Name=OE9A117672T1;product=OE9A117672P1;Description=beta-glucosidase-like;Ontology_term=GO:0004553%2C GO:0005975
OE9A075288	119.42	2.83864	0.550926	5.15249	2.57051e-07	1.55415e-05	OE9A075288	ID=OE9A075288T1;Parent=OE9A075288;Name=OE9A075288T1;product=OE9A075288P1;Description=high-affinity nitrate transporter -like;Ontology_term=GO:0010167%2C GO:0015706%2C GO:0016021
OE9A091939	17.0808	2.83433	0.937535	3.02318	0.00250135	0.0540654	OE9A091939	ID=OE9A091939T2;Parent=OE9A091939;Name=OE9A091939T2;product=OE9A091939P2;Description=aspartic ase 2 isoform X2;Ontology_term=GO:0004190%2C GO:0006508%2C GO:0016021%2C GO:0030163
OE9A010223	340.979	2.82651	0.440566	6.41564	1.40233e-10	1.33807e-08	OE9A010223	ID=OE9A010223T1;Parent=OE9A010223;Name=OE9A010223T1;product=OE9A010223P1
OE9A036088	52.8618	2.82278	0.723683	3.90058	9.59634e-05	0.00330457	OE9A036088	ID=OE9A036088T1;Parent=OE9A036088;Name=OE9A036088T1;product=OE9A036088P1;Description=polygalacturonase inhibitor-like;Ontology_term=GO:0005515
OE9A107461	17.5675	2.82049	0.923418	3.0544	0.00225508	0.0497673	OE9A107461	ID=OE9A107461T1;Parent=OE9A107461;Name=OE9A107461T1;product=OE9A107461P1;Description=;Ontology_term=GO:0016614%2C GO:0050660%2C GO:0055114
OE9A021431	12486.4	2.82039	0.266536	10.5816	3.62523e-26	2.21223e-23	OE9A021431	ID=OE9A021431T1;Parent=OE9A021431;Name=OE9A021431T1;product=OE9A021431P1;Description=zinc finger CCCH domain-containing 29-like;Ontology_term=GO:0005515%2C GO:0046872
OE9A085648	842.257	2.8202	0.394828	7.14287	9.14013e-13	1.24915e-10	OE9A085648	ID=OE9A085648T1;Parent=OE9A085648;Name=OE9A085648T1;product=OE9A085648P1;Description=zinc finger A20 and AN1 domain-containing stress-associated 4-like;Ontology_term=GO:0003677%2C GO:0008270
OE9A106276	134.318	2.80393	0.554954	5.05254	4.35973e-07	2.53657e-05	OE9A106276	ID=OE9A106276T1;Parent=OE9A106276;Name=OE9A106276T1;product=OE9A106276P1;Description=, chromosomal-like;Ontology_term=GO:0005515%2C GO:0005524
OE9A096749	56.0012	2.79859	0.457829	6.11274	9.79343e-10	8.37067e-08	OE9A096749	ID=OE9A096749T1;Parent=OE9A096749;Name=OE9A096749T1;product=OE9A096749P1;Description=NAC domain-containing 35-like;Ontology_term=GO:0003677%2C GO:0006355
OE9A050716	12.7662	2.79752	0.817141	3.42355	0.000618082	0.0171067	OE9A050716	ID=OE9A050716T1;Parent=OE9A050716;Name=OE9A050716T1;product=OE9A050716P1;md5=cb85e09455a1b5bcdf60abb476e08beb;INTERPRO=<table><tr><th>DB</th><th>ID</th><th>Description</th></tr><tr><td>PANTHER</td><td>PTHR14493</td><td></td></tr><tr><td>PANTHER</td><td>PTHR14493:SF53</td><td></td></tr></table>;Description=Zinc finger CCCH domain-containing protein 2
OE9A091063	107.794	2.79164	0.627157	4.45127	8.5364e-06	0.000384211	OE9A091063	ID=OE9A091063T1;Parent=OE9A091063;Name=OE9A091063T1;product=OE9A091063P1;Description=Mediator of RNA polymerase II transcription subunit 18,;Ontology_term=GO:0016020
OE9A036716	780.001	2.78977	0.272502	10.2376	1.34493e-24	7.35228e-22	OE9A036716	ID=OE9A036716T1;Parent=OE9A036716;Name=OE9A036716T1;product=OE9A036716P1;Description=probable inorganic phosphate transporter 1-9;Ontology_term=GO:0016021%2C GO:0022857%2C GO:0055085
OE9A112887	34.8111	2.78848	0.574562	4.85323	1.21469e-06	6.50479e-05	OE9A112887	ID=OE9A112887T1;Parent=OE9A112887;Name=OE9A112887T1;product=OE9A112887P1;Description=G-type lectin S-receptor-like serine threonine- kinase At4g27290 isoform X1;Ontology_term=GO:0004672%2C GO:0005524%2C GO:0006468%2C GO:0016020
OE9A003203	9.92317	2.7818	0.806334	3.44993	0.000560728	0.0158114	OE9A003203	ID=OE9A003203T1;Parent=OE9A003203;Name=OE9A003203T1;product=OE9A003203P1;Description=calcium uniporter 5, mitochondrial-like;Ontology_term=GO:0006810%2C GO:0015292%2C GO:0016021
OE9A037637	62.5996	2.77919	0.43256	6.42498	1.31888e-10	1.26768e-08	OE9A037637	ID=OE9A037637T1;Parent=OE9A037637;Name=OE9A037637T1;product=OE9A037637P1;Description=Serine threonine kinase;Ontology_term=GO:0004672%2C GO:0005524%2C GO:0006468%2C GO:0016020
OE9A078302	853.815	2.77341	0.334654	8.28741	1.15738e-16	2.44918e-14	OE9A078302	ID=OE9A078302T1;Parent=OE9A078302;Name=OE9A078302T1;product=OE9A078302P1;Description=purple acid phosphatase 22-like;Ontology_term=GO:0003993%2C GO:0006771%2C GO:0016311%2C GO:0019497%2C GO:0046872
OE9A060849	14.8324	2.769	0.886568	3.12329	0.00178844	0.0413105	OE9A060849	ID=OE9A060849T1;Parent=OE9A060849;Name=OE9A060849T1;product=OE9A060849P1;Description=inactive cadmium zinc-transporting ATPase HMA3;Ontology_term=GO:0000166%2C GO:0006812%2C GO:0016021%2C GO:0019829%2C GO:0046872
OE9A120389	610.837	2.76572	0.464128	5.95896	2.53855e-09	2.04959e-07	OE9A120389	ID=OE9A120389T2;Parent=OE9A120389;Name=OE9A120389T2;product=OE9A120389P2;Description=transcription factor bHLH137-like;Ontology_term=GO:0046983
OE9A048414	277.92	2.76424	0.779534	3.54602	0.000391096	0.0115307	OE9A048414	ID=OE9A048414T1;Parent=OE9A048414;Name=OE9A048414T1;product=OE9A048414P1
OE9A033907	24.383	2.75773	0.543407	5.07488	3.87745e-07	2.27616e-05	OE9A033907	ID=OE9A033907T1;Parent=OE9A033907;Name=OE9A033907T1;product=OE9A033907P1
OE9A106414	2342.43	2.75035	0.244891	11.2309	2.87445e-29	2.90099e-26	OE9A106414	ID=OE9A106414T1;Parent=OE9A106414;Name=OE9A106414T1;product=OE9A106414P1;Description=cytochrome b561 and DOMON domain-containing At5g47530-like;Ontology_term=GO:0016021%2C GO:0055114
OE9A099983	2899.57	2.74905	0.307559	8.93828	3.95269e-19	1.16538e-16	OE9A099983	ID=OE9A099983T1;Parent=OE9A099983;Name=OE9A099983T1;product=OE9A099983P1;Description=ethylene-responsive transcription factor 5-like;Ontology_term=GO:0003677%2C GO:0003700%2C GO:0005667%2C GO:0006355%2C GO:0045449
OE9A106101	85.1249	2.7485	0.576483	4.76771	1.8633e-06	9.51224e-05	OE9A106101	ID=OE9A106101T1;Parent=OE9A106101;Name=OE9A106101T1;product=OE9A106101P1;Description=ankyrin repeat-containing BDA1-like;Ontology_term=GO:0005515
OE9A106246	386.615	2.7438	0.794938	3.45159	0.000557297	0.015758	OE9A106246	ID=OE9A106246T1;Parent=OE9A106246;Name=OE9A106246T1;product=OE9A106246P1;Description=glucan endo-1,3-beta-glucosidase, acidic-like;Ontology_term=GO:0004553%2C GO:0005975
OE9A014114	229.073	2.73849	0.386636	7.08287	1.41197e-12	1.85251e-10	OE9A014114	ID=OE9A014114T1;Parent=OE9A014114;Name=OE9A014114T1;product=OE9A014114P1;Description=protein DMP5-like;Ontology_term=GO:0016021
OE9A041966	231.098	2.73773	0.37609	7.27945	3.35172e-13	4.85907e-11	OE9A041966	ID=OE9A041966T1;Parent=OE9A041966;Name=OE9A041966T1;product=OE9A041966P1;Description=PLANT CADMIUM RESISTANCE 2-like;Ontology_term=GO:0016021
OE9A095690	32.0458	2.73105	0.603992	4.52167	6.13538e-06	0.000284743	OE9A095690	ID=OE9A095690T1;Parent=OE9A095690;Name=OE9A095690T1;product=OE9A095690P1;Description=GDSL esterase lipase At5g55050-like;Ontology_term=GO:0016788
OE9A069927	1335.98	2.73048	0.359118	7.6033	2.88663e-14	4.64695e-12	OE9A069927	ID=OE9A069927T1;Parent=OE9A069927;Name=OE9A069927T1;product=OE9A069927P1
OE9A107254	65.1213	2.72814	0.636707	4.28477	1.82928e-05	0.000761908	OE9A107254	ID=OE9A107254T1;Parent=OE9A107254;Name=OE9A107254T1;product=OE9A107254P1;Description=hypothetical protein DCAR_020470;Ontology_term=GO:0016020
OE9A090230	328.549	2.72688	0.474977	5.74107	9.40782e-09	6.87895e-07	OE9A090230	ID=OE9A090230T1;Parent=OE9A090230;Name=OE9A090230T1;product=OE9A090230P1
OE9A027105	50.9487	2.72542	0.712192	3.82681	0.000129815	0.00432277	OE9A027105	ID=OE9A027105T1;Parent=OE9A027105;Name=OE9A027105T1;product=OE9A027105P1;Description=ankyrin repeat-containing At3g12360-like;Ontology_term=GO:0005515
OE9A042937	10852.8	2.72521	0.277342	9.82618	8.6852e-23	3.9293e-20	OE9A042937	ID=OE9A042937T1;Parent=OE9A042937;Name=OE9A042937T1;product=OE9A042937P1;Description=zinc finger CCCH domain-containing 29-like;Ontology_term=GO:0005515%2C GO:0046872
OE9A043543	39.6169	2.72264	0.634468	4.29122	1.77695e-05	0.000744843	OE9A043543	ID=OE9A043543T1;Parent=OE9A043543;Name=OE9A043543T1;product=OE9A043543P1;Description=LEAF RUST 10 DISEASE-RESISTANCE LOCUS RECEPTOR-LIKE PROTEIN KINASE-like;Ontology_term=GO:0004672%2C GO:0005524%2C GO:0006468
OE9A009435	655.078	2.72074	0.444455	6.12151	9.26937e-10	8.02733e-08	OE9A009435	ID=OE9A009435T1;Parent=OE9A009435;Name=OE9A009435T1;product=OE9A009435P1;Description=auxin-responsive SAUR36-like;Ontology_term=GO:0009733
OE9A018426	117.855	2.71677	0.419738	6.47253	9.6375e-11	9.50707e-09	OE9A018426	ID=OE9A018426T1;Parent=OE9A018426;Name=OE9A018426T1;product=OE9A018426P1;Description=late embryogenesis abundant At1g64065;Ontology_term=GO:0016020
OE9A114583	3329.77	2.70409	0.31206	8.66529	4.50371e-18	1.1586e-15	OE9A114583	ID=OE9A114583T1;Parent=OE9A114583;Name=OE9A114583T1;product=OE9A114583P1
OE9A100009	123.02	2.70382	0.441158	6.12893	8.84736e-10	7.68724e-08	OE9A100009	ID=OE9A100009T1;Parent=OE9A100009;Name=OE9A100009T1;product=OE9A100009P1;Description=exocyst complex component EXO70A1-like;Ontology_term=GO:0000145%2C GO:0006887
OE9A112485	180.424	2.70127	0.372749	7.24689	4.26463e-13	6.14856e-11	OE9A112485	ID=OE9A112485T2;Parent=OE9A112485;Name=OE9A112485T2;product=OE9A112485P2;Description=Serine threonine kinase;Ontology_term=GO:0004674%2C GO:0005515%2C GO:0005524%2C GO:0006468%2C GO:0009069%2C GO:0016021%2C GO:0048544
OE9A106281	81.1839	2.69578	0.44898	6.00423	1.92238e-09	1.59127e-07	OE9A106281	ID=OE9A106281T1;Parent=OE9A106281;Name=OE9A106281T1;product=OE9A106281P1;Description=Serine threonine kinase;Ontology_term=GO:0004672%2C GO:0005509%2C GO:0005515%2C GO:0005524%2C GO:0006468%2C GO:0030247
OE9A029163	18.2718	2.6957	0.700436	3.84861	0.000118792	0.00399116	OE9A029163	ID=OE9A029163T1;Parent=OE9A029163;Name=OE9A029163T1;product=OE9A029163P1
OE9A026208	538.181	2.69462	0.503388	5.35297	8.65211e-08	5.70431e-06	OE9A026208	ID=OE9A026208T1;Parent=OE9A026208;Name=OE9A026208T1;product=OE9A026208P1
OE9A043154	8567.38	2.68565	0.301403	8.91049	5.08056e-19	1.46499e-16	OE9A043154	ID=OE9A043154T1;Parent=OE9A043154;Name=OE9A043154T1;product=OE9A043154P1;Description=zinc finger CCCH domain-containing 29-like;Ontology_term=GO:0005515%2C GO:0046872
OE9A085084	60.0086	2.68239	0.593037	4.52315	6.09269e-06	0.000283461	OE9A085084	ID=OE9A085084T1;Parent=OE9A085084;Name=OE9A085084T1;product=OE9A085084P1;Description=(-)-isopiperitenol (-)-carveol dehydrogenase, mitochondrial-like;Ontology_term=GO:0016491
OE9A118827	281.681	2.68185	0.457735	5.85897	4.6574e-09	3.62641e-07	OE9A118827	ID=OE9A118827T1;Parent=OE9A118827;Name=OE9A118827T1;product=OE9A118827P1;Description=ethylene-responsive transcription factor ERF014-like;Ontology_term=GO:0003677%2C GO:0003700%2C GO:0005667%2C GO:0006355%2C GO:0045449
OE9A056077	118.46	2.68032	0.508476	5.27128	1.35477e-07	8.58674e-06	OE9A056077	ID=OE9A056077T1;Parent=OE9A056077;Name=OE9A056077T1;product=OE9A056077P1
OE9A010507	22.6759	2.67814	0.72505	3.69373	0.000220984	0.00690313	OE9A010507	ID=OE9A010507T1;Parent=OE9A010507;Name=OE9A010507T1;product=OE9A010507P1;Description=Serine threonine kinase;Ontology_term=GO:0004672%2C GO:0005524%2C GO:0006468
OE9A116396	17.7614	2.67807	0.95307	2.80994	0.00495506	0.0897313	OE9A116396	ID=OE9A116396T1;Parent=OE9A116396;Name=OE9A116396T1;product=OE9A116396P1;Description=probable calcium-binding CML44;Ontology_term=GO:0005509
OE9A117660	75.5543	2.67493	0.73809	3.62412	0.000289944	0.00880571	OE9A117660	ID=OE9A117660T1;Parent=OE9A117660;Name=OE9A117660T1;product=OE9A117660P1;Description=xyloglucan endotransglucosylase hydrolase 2-like;Ontology_term=GO:0004553%2C GO:0005618%2C GO:0010411%2C GO:0016762%2C GO:0042546%2C GO:0048046
OE9A084147	56.746	2.67192	0.429683	6.21835	5.02401e-10	4.48402e-08	OE9A084147	ID=OE9A084147T1;Parent=OE9A084147;Name=OE9A084147T1;product=OE9A084147P1
OE9A011034	1098.54	2.67148	0.304591	8.77074	1.77501e-18	4.75269e-16	OE9A011034	ID=OE9A011034T1;Parent=OE9A011034;Name=OE9A011034T1;product=OE9A011034P1
OE9A014402	65.4935	2.66381	0.529218	5.03349	4.81637e-07	2.78988e-05	OE9A014402	ID=OE9A014402T1;Parent=OE9A014402;Name=OE9A014402T1;product=OE9A014402P1;Description=auxin-responsive SAUR32-like;Ontology_term=GO:0009733
OE9A008644	34.5582	2.65943	0.707586	3.75845	0.000170971	0.00554545	OE9A008644	ID=OE9A008644T1;Parent=OE9A008644;Name=OE9A008644T1;product=OE9A008644P1;Description=cysteine ase inhibitor B-like;Ontology_term=GO:0004869%2C GO:0010951
OE9A048333	13.5853	2.65582	0.906543	2.92961	0.00339386	0.0675682	OE9A048333	ID=OE9A048333T1;Parent=OE9A048333;Name=OE9A048333T1;product=OE9A048333P1
OE9A053907	5638.31	2.65185	0.301157	8.80555	1.30213e-18	3.52247e-16	OE9A053907	ID=OE9A053907T1;Parent=OE9A053907;Name=OE9A053907T1;product=OE9A053907P1;Description=scarecrow 21;Ontology_term=GO:0003700%2C GO:0005634%2C GO:0005667%2C GO:0006355%2C GO:0043565%2C GO:0045449
OE9A019866	213.075	2.64642	0.456752	5.794	6.87278e-09	5.19717e-07	OE9A019866	ID=OE9A019866T1;Parent=OE9A019866;Name=OE9A019866T1;product=OE9A019866P1;Description=calcium-transporting ATPase 2, plasma membrane-type;Ontology_term=GO:0005388%2C GO:0005516%2C GO:0005524%2C GO:0016021%2C GO:0016529%2C GO:0046872%2C GO:0070588
OE9A029263	41.9632	2.64613	0.832166	3.1798	0.00147374	0.0353806	OE9A029263	ID=OE9A029263T1;Parent=OE9A029263;Name=OE9A029263T1;product=OE9A029263P1;Description=major allergen Pru ar 1-like;Ontology_term=GO:0004864%2C GO:0004872%2C GO:0005634%2C GO:0005737%2C GO:0006952%2C GO:0009607%2C GO:0009738%2C GO:0010427%2C GO:0043086%2C GO:0080163
OE9A084330	614.482	2.64412	0.369111	7.16348	7.86534e-13	1.08624e-10	OE9A084330	ID=OE9A084330T1;Parent=OE9A084330;Name=OE9A084330T1;product=OE9A084330P1;Description=ethylene-responsive transcription factor 5-like;Ontology_term=GO:0003677%2C GO:0003700%2C GO:0005667%2C GO:0006355%2C GO:0045449
OE9A011505	1620.87	2.64402	0.368786	7.16952	7.52588e-13	1.04486e-10	OE9A011505	ID=OE9A011505T1;Parent=OE9A011505;Name=OE9A011505T1;product=OE9A011505P1
OE9A111307	15.1651	2.64287	0.85198	3.10203	0.00192198	0.0438164	OE9A111307	ID=OE9A111307T1;Parent=OE9A111307;Name=OE9A111307T1;product=OE9A111307P1;Description=receptor 12;Ontology_term=GO:0005515
OE9A065931	296.985	2.64136	0.454526	5.81125	6.20078e-09	4.74368e-07	OE9A065931	ID=OE9A065931T1;Parent=OE9A065931;Name=OE9A065931T1;product=OE9A065931P1;Description=Mediator of RNA polymerase II transcription subunit 18,;Ontology_term=GO:0016020
OE9A088460	80.3316	2.63728	0.582291	4.52914	5.92239e-06	0.000277012	OE9A088460	ID=OE9A088460T1;Parent=OE9A088460;Name=OE9A088460T1;product=OE9A088460P1
OE9A105623	199.347	2.62992	0.410977	6.39919	1.56205e-10	1.47972e-08	OE9A105623	ID=OE9A105623T1;Parent=OE9A105623;Name=OE9A105623T1;product=OE9A105623P1;Description=probable CCR4-associated factor 1 homolog 11;Ontology_term=GO:0000175%2C GO:0000288%2C GO:0003676%2C GO:0005634%2C GO:0030014%2C GO:0051252
OE9A115757	125.087	2.62863	0.602631	4.36192	1.28925e-05	0.000556411	OE9A115757	ID=OE9A115757T1;Parent=OE9A115757;Name=OE9A115757T1;product=OE9A115757P1;Description=ankyrin repeat-containing At3g12360-like;Ontology_term=GO:0005515%2C GO:0007165%2C GO:0016020
OE9A070518	79.045	2.62595	0.685939	3.82826	0.000129053	0.00430834	OE9A070518	ID=OE9A070518T1;Parent=OE9A070518;Name=OE9A070518T1;product=OE9A070518P1;Description=acidic mammalian chitinase-like;Ontology_term=GO:0004568%2C GO:0005576%2C GO:0005975%2C GO:0006032%2C GO:0008061%2C GO:0016998
OE9A081767	305.657	2.62155	0.337244	7.77345	7.63747e-15	1.30135e-12	OE9A081767	ID=OE9A081767T1;Parent=OE9A081767;Name=OE9A081767T1;product=OE9A081767P1;Description=Beta-1,4-mannosyl-glyco 4-beta-N-acetylglucosaminyltransferase;Ontology_term=GO:0003830%2C GO:0006487%2C GO:0016021
OE9A024782	21.2927	2.62004	0.683776	3.83172	0.000127252	0.00425906	OE9A024782	ID=OE9A024782T1;Parent=OE9A024782;Name=OE9A024782T1;product=OE9A024782P1;Description=probable LRR receptor-like serine threonine- kinase At4g36180 isoform X1;Ontology_term=GO:0005515
OE9A059221	98.4125	2.61997	0.553473	4.73368	2.20482e-06	0.00011062	OE9A059221	ID=OE9A059221T1;Parent=OE9A059221;Name=OE9A059221T1;product=OE9A059221P1
OE9A053656	45.7977	2.61899	0.450003	5.81994	5.88693e-09	4.51675e-07	OE9A053656	ID=OE9A053656T2;Parent=OE9A053656;Name=OE9A053656T2;product=OE9A053656P2;Description=;Ontology_term=GO:0003824%2C GO:0005992
OE9A083347	236.034	2.61598	0.497129	5.26217	1.42366e-07	9.00168e-06	OE9A083347	ID=OE9A083347T1;Parent=OE9A083347;Name=OE9A083347T1;product=OE9A083347P1;Description=lysosomal beta glucosidase-like;Ontology_term=GO:0004553%2C GO:0005975
OE9A085767	8.6464	2.61584	0.86711	3.01674	0.00255512	0.054687	OE9A085767	ID=OE9A085767T1;Parent=OE9A085767;Name=OE9A085767T1;product=OE9A085767P1;Description=Mg2+ transporter , Zinc transport;Ontology_term=GO:0016021%2C GO:0030001%2C GO:0046873%2C GO:0055085
OE9A086851	774.522	2.61303	0.28815	9.0683	1.20887e-19	4.01528e-17	OE9A086851	ID=OE9A086851T1;Parent=OE9A086851;Name=OE9A086851T1;product=OE9A086851P1
OE9A006276	4605.85	2.6108	0.367656	7.10122	1.23661e-12	1.63882e-10	OE9A006276	ID=OE9A006276T1;Parent=OE9A006276;Name=OE9A006276T1;product=OE9A006276P1;Description=calcium-binding CML42;Ontology_term=GO:0005509
OE9A035428	26.893	2.6105	0.779848	3.34744	0.000815606	0.0216395	OE9A035428	ID=OE9A035428T1;Parent=OE9A035428;Name=OE9A035428T1;product=OE9A035428P1
OE9A119978	10805.4	2.61049	0.258769	10.0881	6.2378e-24	3.20941e-21	OE9A119978	ID=OE9A119978T1;Parent=OE9A119978;Name=OE9A119978T1;product=OE9A119978P1;Description=ethylene-responsive transcription factor 5-like;Ontology_term=GO:0003677%2C GO:0003700%2C GO:0005667%2C GO:0006355%2C GO:0045449
OE9A047145	1975.95	2.60908	0.23505	11.1001	1.2532e-28	1.06077e-25	OE9A047145	ID=OE9A047145T1;Parent=OE9A047145;Name=OE9A047145T1;product=OE9A047145P1
OE9A049687	434.782	2.59936	0.312882	8.30778	9.75066e-17	2.09719e-14	OE9A049687	ID=OE9A049687T1;Parent=OE9A049687;Name=OE9A049687T1;product=OE9A049687P1
OE9A024506	218.145	2.59826	0.326407	7.9602	1.71766e-15	3.10838e-13	OE9A024506	ID=OE9A024506T1;Parent=OE9A024506;Name=OE9A024506T1;product=OE9A024506P1;Description=probable inorganic phosphate transporter 1-9;Ontology_term=GO:0016021%2C GO:0022857%2C GO:0055085
OE9A081297	265.1	2.59323	0.450088	5.76161	8.33157e-09	6.15832e-07	OE9A081297	ID=OE9A081297T1;Parent=OE9A081297;Name=OE9A081297T1;product=OE9A081297P1
OE9A046673	175.463	2.58942	0.46676	5.54765	2.89535e-08	1.99932e-06	OE9A046673	ID=OE9A046673T1;Parent=OE9A046673;Name=OE9A046673T1;product=OE9A046673P1
OE9A087360	1983.74	2.57993	0.323583	7.97302	1.54839e-15	2.84124e-13	OE9A087360	ID=OE9A087360T1;Parent=OE9A087360;Name=OE9A087360T1;product=OE9A087360P1;Description=glucan endo-1,3-beta-glucosidase-like;Ontology_term=GO:0004553%2C GO:0005975
OE9A065125	1627.5	2.57552	0.304066	8.47027	2.44821e-17	5.49069e-15	OE9A065125	ID=OE9A065125T1;Parent=OE9A065125;Name=OE9A065125T1;product=OE9A065125P1
OE9A045580	207.502	2.57169	0.909945	2.8262	0.0047104	0.0865553	OE9A045580	ID=OE9A045580T1;Parent=OE9A045580;Name=OE9A045580T1;product=OE9A045580P1
OE9A103367	170.061	2.57145	0.478921	5.36925	7.90627e-08	5.2389e-06	OE9A103367	ID=OE9A103367T1;Parent=OE9A103367;Name=OE9A103367T1;product=OE9A103367P1;Description=transcription factor MYB108-like;Ontology_term=GO:0003677
OE9A075065	4561.1	2.5658	0.307506	8.3439	7.18805e-17	1.58499e-14	OE9A075065	ID=OE9A075065T1;Parent=OE9A075065;Name=OE9A075065T1;product=OE9A075065P1;Description=SRC2 homolog, partial;Ontology_term=GO:0005515
OE9A003051	7074.57	2.55692	0.308937	8.27651	1.26837e-16	2.64142e-14	OE9A003051	ID=OE9A003051T1;Parent=OE9A003051;Name=OE9A003051T1;product=OE9A003051P1
OE9A089996	79.85	2.55002	0.588995	4.32945	1.49483e-05	0.000634698	OE9A089996	ID=OE9A089996T1;Parent=OE9A089996;Name=OE9A089996T1;product=OE9A089996P1
OE9A088383	720.334	2.54342	0.308524	8.24385	1.66761e-16	3.3898e-14	OE9A088383	ID=OE9A088383T1;Parent=OE9A088383;Name=OE9A088383T1;product=OE9A088383P1;Description=argonaute 2;Ontology_term=GO:0003676%2C GO:0005515
OE9A082501	666.834	2.54244	0.296102	8.58637	8.97641e-18	2.21191e-15	OE9A082501	ID=OE9A082501T1;Parent=OE9A082501;Name=OE9A082501T1;product=OE9A082501P1
OE9A116071	296.083	2.53915	0.413508	6.14051	8.22591e-10	7.17103e-08	OE9A116071	ID=OE9A116071T1;Parent=OE9A116071;Name=OE9A116071T1;product=OE9A116071P1;Description=NDR1 HIN1-Like 3-like;Ontology_term=GO:0016021
OE9A104782	4531.31	2.53833	0.400188	6.34285	2.2556e-10	2.09883e-08	OE9A104782	ID=OE9A104782T1;Parent=OE9A104782;Name=OE9A104782T1;product=OE9A104782P1;Description=expansin-like A2;Ontology_term=GO:0005576%2C GO:0009505%2C GO:0009506%2C GO:0016020%2C GO:0019953
OE9A028341	673.545	2.53523	0.48908	5.18368	2.17555e-07	1.33333e-05	OE9A028341	ID=OE9A028341T1;Parent=OE9A028341;Name=OE9A028341T1;product=OE9A028341P1;Description=C-repeat dehydration-responsive element-binding factor 4;Ontology_term=GO:0003677%2C GO:0003700%2C GO:0005634%2C GO:0005667%2C GO:0006355%2C GO:0045449
OE9A045411	650.116	2.52926	0.287208	8.80637	1.29268e-18	3.52247e-16	OE9A045411	ID=OE9A045411T1;Parent=OE9A045411;Name=OE9A045411T1;product=OE9A045411P1
OE9A091786	72.2713	2.52819	0.594716	4.25109	2.12728e-05	0.000869469	OE9A091786	ID=OE9A091786T1;Parent=OE9A091786;Name=OE9A091786T1;product=OE9A091786P1;Description=zinc finger ZAT11-like;Ontology_term=GO:0003700%2C GO:0005634%2C GO:0005667%2C GO:0010200%2C GO:0043565%2C GO:0044212%2C GO:0045449%2C GO:0046872
OE9A117718	359.494	2.52723	0.290419	8.70199	3.26113e-18	8.5572e-16	OE9A117718	ID=OE9A117718T1;Parent=OE9A117718;Name=OE9A117718T1;product=OE9A117718P1;Description=poly polymerase;Ontology_term=GO:0005730
OE9A085091	479.853	2.52704	0.307502	8.21797	2.06979e-16	4.08356e-14	OE9A085091	ID=OE9A085091T1;Parent=OE9A085091;Name=OE9A085091T1;product=OE9A085091P1;Description=probable mannitol dehydrogenase;Ontology_term=GO:0008270%2C GO:0046029%2C GO:0055114
OE9A117817	21.9802	2.51662	0.586846	4.28838	1.79978e-05	0.000750814	OE9A117817	ID=OE9A117817T1;Parent=OE9A117817;Name=OE9A117817T1;product=OE9A117817P1
OE9A075123	797.347	2.51524	0.376102	6.68767	2.26754e-11	2.48955e-09	OE9A075123	ID=OE9A075123T1;Parent=OE9A075123;Name=OE9A075123T1;product=OE9A075123P1;Description=ethylene-responsive transcription factor 5-like;Ontology_term=GO:0003677%2C GO:0003700%2C GO:0005667%2C GO:0006355%2C GO:0045449
OE9A043355	3449.35	2.51453	0.34896	7.20579	5.77079e-13	8.18517e-11	OE9A043355	ID=OE9A043355T1;Parent=OE9A043355;Name=OE9A043355T1;product=OE9A043355P1
OE9A036280	64.7963	2.5114	0.438638	5.72546	1.03156e-08	7.49806e-07	OE9A036280	ID=OE9A036280T1;Parent=OE9A036280;Name=OE9A036280T1;product=OE9A036280P1;Description=late embryogenesis abundant At1g64065-like;Ontology_term=GO:0016020
OE9A069045	203.278	2.51026	0.739411	3.39494	0.000686425	0.0186651	OE9A069045	ID=OE9A069045T1;Parent=OE9A069045;Name=OE9A069045T1;product=OE9A069045P1;Description=uncharacterized protein LOC111386977;Ontology_term=GO:0016020
OE9A073727	14.3039	2.50884	0.84209	2.9793	0.00288909	0.0604542	OE9A073727	ID=OE9A073727T1;Parent=OE9A073727;Name=OE9A073727T1;product=OE9A073727P1
OE9A067990	149.184	2.50881	0.421372	5.9539	2.61833e-09	2.10107e-07	OE9A067990	ID=OE9A067990T1;Parent=OE9A067990;Name=OE9A067990T1;product=OE9A067990P1;Description=uncharacterized protein LOC111404955;Ontology_term=GO:0016021
OE9A038228	1200.98	2.50287	0.459486	5.44711	5.11938e-08	3.43562e-06	OE9A038228	ID=OE9A038228T1;Parent=OE9A038228;Name=OE9A038228T1;product=OE9A038228P1;Description=salicylic acid-binding 2;Ontology_term=GO:0009862%2C GO:0016042%2C GO:0016298%2C GO:0080031
OE9A114387	146.492	2.5021	0.574561	4.35481	1.33184e-05	0.000571037	OE9A114387	ID=OE9A114387T1;Parent=OE9A114387;Name=OE9A114387T1;product=OE9A114387P1;Description=C-repeat dehydration-responsive element-binding factor 4;Ontology_term=GO:0003677%2C GO:0003700%2C GO:0005634%2C GO:0005667%2C GO:0006355%2C GO:0045449
OE9A057678	157.917	2.50126	0.291154	8.59083	8.63427e-18	2.15775e-15	OE9A057678	ID=OE9A057678T1;Parent=OE9A057678;Name=OE9A057678T1;product=OE9A057678P1
OE9A038526	532.454	2.50045	0.423565	5.90335	3.56194e-09	2.82373e-07	OE9A038526	ID=OE9A038526T1;Parent=OE9A038526;Name=OE9A038526T1;product=OE9A038526P1
OE9A064613	19.5071	2.49859	0.66815	3.73957	0.000184339	0.00589165	OE9A064613	ID=OE9A064613T1;Parent=OE9A064613;Name=OE9A064613T1;product=OE9A064613P1;Description=probable hydroxyacylglutathione hydrolase 2, chloroplastic;Ontology_term=GO:0004416%2C GO:0006090%2C GO:0019243
OE9A101290	220.886	2.49308	0.45286	5.5052	3.68758e-08	2.51985e-06	OE9A101290	ID=OE9A101290T1;Parent=OE9A101290;Name=OE9A101290T1;product=OE9A101290P1;Description=high mobility group B 1-like;Ontology_term=GO:0005982%2C GO:0005985%2C GO:0006011%2C GO:0016020%2C GO:0016760%2C GO:0030244
OE9A075037	13.9478	2.4766	0.798336	3.1022	0.00192089	0.0438164	OE9A075037	ID=OE9A075037T1;Parent=OE9A075037;Name=OE9A075037T1;product=OE9A075037P1;Description=probable phosphatase 2C 58;Ontology_term=GO:0004722%2C GO:0006470%2C GO:0008287
OE9A040473	50.4995	2.47585	0.505726	4.89562	9.79947e-07	5.30818e-05	OE9A040473	ID=OE9A040473T1;Parent=OE9A040473;Name=OE9A040473T1;product=OE9A040473P1
OE9A074593	93.2645	2.47548	0.337359	7.33782	2.17096e-13	3.24835e-11	OE9A074593	ID=OE9A074593T1;Parent=OE9A074593;Name=OE9A074593T1;product=OE9A074593P1;Description=uncharacterized protein LOC111373047;Ontology_term=GO:0016021
OE9A015716	110.496	2.46922	0.512006	4.82264	1.41673e-06	7.46484e-05	OE9A015716	ID=OE9A015716T1;Parent=OE9A015716;Name=OE9A015716T1;product=OE9A015716P1;Description=NAC domain-containing 90;Ontology_term=GO:0003677%2C GO:0005634%2C GO:0006355
OE9A021015	31.2235	2.46584	0.575676	4.28338	1.84073e-05	0.000765464	OE9A021015	ID=OE9A021015T1;Parent=OE9A021015;Name=OE9A021015T1;product=OE9A021015P1;Description=NRT1 PTR FAMILY -like;Ontology_term=GO:0005215%2C GO:0006810%2C GO:0016020
OE9A034538	19959.5	2.46547	0.297838	8.27792	1.2535e-16	2.63135e-14	OE9A034538	ID=OE9A034538T1;Parent=OE9A034538;Name=OE9A034538T1;product=OE9A034538P1;Description=nematode resistance -like HSPRO2;Ontology_term=GO:0006952
OE9A041775	313.945	2.46511	0.380319	6.48169	9.07025e-11	9.04956e-09	OE9A041775	ID=OE9A041775T1;Parent=OE9A041775;Name=OE9A041775T1;product=OE9A041775P1;Description=oxalate-- ligase-like;Ontology_term=GO:0009506%2C GO:0009570%2C GO:0009735%2C GO:0009805%2C GO:0009809%2C GO:0009811%2C GO:0010030%2C GO:0010214%2C GO:0016207%2C GO:0033611%2C GO:0046487%2C GO:0048046%2C GO:0050203%2C GO:0050832
OE9A085702	225.4	2.46471	0.327524	7.52528	5.26087e-14	8.31598e-12	OE9A085702	ID=OE9A085702T1;Parent=OE9A085702;Name=OE9A085702T1;product=OE9A085702P1;Description=receptor 12;Ontology_term=GO:0005515%2C GO:0016020
OE9A085531	139.305	2.46392	0.631649	3.90078	9.58822e-05	0.00330457	OE9A085531	ID=OE9A085531T1;Parent=OE9A085531;Name=OE9A085531T1;product=OE9A085531P1;Description=xyloglucan endotransglucosylase hydrolase 2;Ontology_term=GO:0004553%2C GO:0005618%2C GO:0010411%2C GO:0016762%2C GO:0042546%2C GO:0048046%2C GO:0071555
OE9A084278	654.434	2.46107	0.355177	6.92913	4.23443e-12	5.36771e-10	OE9A084278	ID=OE9A084278T1;Parent=OE9A084278;Name=OE9A084278T1;product=OE9A084278P1;Description=LYK5;Ontology_term=GO:0004672%2C GO:0005524%2C GO:0006468%2C GO:0016020
OE9A072634	24.8761	2.45772	0.763956	3.2171	0.00129493	0.0318454	OE9A072634	ID=OE9A072634T1;Parent=OE9A072634;Name=OE9A072634T1;product=OE9A072634P1;Description=Serine threonine kinase;Ontology_term=GO:0005509%2C GO:0005515%2C GO:0030247
OE9A024286	72.31	2.45585	0.60976	4.02757	5.63557e-05	0.00209168	OE9A024286	ID=OE9A024286T1;Parent=OE9A024286;Name=OE9A024286T1;product=OE9A024286P1
OE9A030853	40.3652	2.4542	0.468767	5.23544	1.64591e-07	1.0186e-05	OE9A030853	ID=OE9A030853T1;Parent=OE9A030853;Name=OE9A030853T1;product=OE9A030853P1;Description=sentrin-specific protease 1-like;Ontology_term=GO:0006508%2C GO:0008234
OE9A069924	320.818	2.45149	0.345017	7.1054	1.19971e-12	1.59799e-10	OE9A069924	ID=OE9A069924T1;Parent=OE9A069924;Name=OE9A069924T1;product=OE9A069924P1;Description=G-type lectin S-receptor-like serine threonine- kinase LECRK3;Ontology_term=GO:0004674%2C GO:0005524%2C GO:0005886%2C GO:0006468%2C GO:0009069
OE9A117633	77.8013	2.45014	0.608614	4.02577	5.67883e-05	0.00210173	OE9A117633	ID=OE9A117633T1;Parent=OE9A117633;Name=OE9A117633T1;product=OE9A117633P1;Description=NAC domain-containing 90-like;Ontology_term=GO:0003677%2C GO:0006355
OE9A112876	54.0184	2.44748	0.596791	4.10107	4.11249e-05	0.00158461	OE9A112876	ID=OE9A112876T1;Parent=OE9A112876;Name=OE9A112876T1;product=OE9A112876P1;Description=chitinase 10;Ontology_term=GO:0004568%2C GO:0005975%2C GO:0006032%2C GO:0016021%2C GO:0016998
OE9A083104	47.2122	2.44495	0.76935	3.17795	0.0014832	0.0355426	OE9A083104	ID=OE9A083104T1;Parent=OE9A083104;Name=OE9A083104T1;product=OE9A083104P1;Description=pathogenesis-related STH-2-like;Ontology_term=GO:0004864%2C GO:0004872%2C GO:0005634%2C GO:0005737%2C GO:0006952%2C GO:0009607%2C GO:0009738%2C GO:0010427%2C GO:0043086%2C GO:0080163
OE9A004421	34.4593	2.44364	0.630352	3.87663	0.000105913	0.00362341	OE9A004421	ID=OE9A004421T1;Parent=OE9A004421;Name=OE9A004421T1;product=OE9A004421P1;Description=homeobox-leucine zipper HOX11-like;Ontology_term=GO:0003700%2C GO:0005667%2C GO:0006355%2C GO:0043565%2C GO:0045449
OE9A012294	143.781	2.44077	0.489823	4.98296	6.26174e-07	3.54877e-05	OE9A012294	ID=OE9A012294T1;Parent=OE9A012294;Name=OE9A012294T1;product=OE9A012294P1;Description=allene oxide synthase 1, chloroplastic-like;Ontology_term=GO:0004497%2C GO:0005506%2C GO:0016705%2C GO:0020037%2C GO:0055114
OE9A004621	58.9553	2.43707	0.443289	5.4977	3.84775e-08	2.62247e-06	OE9A004621	ID=OE9A004621T1;Parent=OE9A004621;Name=OE9A004621T1;product=OE9A004621P1;Description=LPS-induced tumor necrosis factor alpha factor;Ontology_term=GO:0005886%2C GO:0016021%2C GO:0034051
OE9A038395	25.7203	2.43677	0.616573	3.95212	7.74635e-05	0.00273941	OE9A038395	ID=OE9A038395T1;Parent=OE9A038395;Name=OE9A038395T1;product=OE9A038395P1;Description=pollen receptor-like kinase 1;Ontology_term=GO:0004672%2C GO:0005515%2C GO:0005524%2C GO:0006468%2C GO:0016020
OE9A038510	89.4533	2.4291	0.505485	4.80549	1.54373e-06	8.06923e-05	OE9A038510	ID=OE9A038510T1;Parent=OE9A038510;Name=OE9A038510T1;product=OE9A038510P1;Description=allene oxide synthase 1, chloroplastic-like;Ontology_term=GO:0004497%2C GO:0005506%2C GO:0016705%2C GO:0020037%2C GO:0047987%2C GO:0055114
OE9A100613	511.653	2.42776	0.354788	6.84285	7.7633e-12	9.34445e-10	OE9A100613	ID=OE9A100613T1;Parent=OE9A100613;Name=OE9A100613T1;product=OE9A100613P1;Description=U-box domain-containing 4-like;Ontology_term=GO:0005515%2C GO:0005634%2C GO:0005737
OE9A006012	12.5424	2.4179	0.829998	2.91314	0.00357815	0.0705415	OE9A006012	ID=OE9A006012T1;Parent=OE9A006012;Name=OE9A006012T1;product=OE9A006012P1;Description=probable mediator of RNA polymerase II transcription subunit 26b;Ontology_term=GO:0005634
OE9A033316	105.655	2.41649	0.638972	3.78185	0.000155669	0.00508778	OE9A033316	ID=OE9A033316T1;Parent=OE9A033316;Name=OE9A033316T1;product=OE9A033316P1
OE9A021231	298.804	2.41365	0.453545	5.32175	1.02774e-07	6.62604e-06	OE9A021231	ID=OE9A021231T1;Parent=OE9A021231;Name=OE9A021231T1;product=OE9A021231P1;Description=U-box domain-containing 28-like;Ontology_term=GO:0004842%2C GO:0005488%2C GO:0016567
OE9A003203	19.4232	2.41306	0.565546	4.26678	1.98311e-05	0.00081643	OE9A003203	ID=OE9A003203T1;Parent=OE9A003203;Name=OE9A003203T1;product=OE9A003203P1;Description=calcium uniporter 5, mitochondrial-like;Ontology_term=GO:0006810%2C GO:0015292%2C GO:0016021
OE9A096960	1942.4	2.40723	0.348301	6.91135	4.80049e-12	5.99832e-10	OE9A096960	ID=OE9A096960T1;Parent=OE9A096960;Name=OE9A096960T1;product=OE9A096960P1;Description=probable WRKY transcription factor 53;Ontology_term=GO:0003700%2C GO:0005667%2C GO:0006355%2C GO:0043565%2C GO:0045449
OE9A061692	430.11	2.39591	0.29066	8.243	1.6794e-16	3.3898e-14	OE9A061692	ID=OE9A061692T1;Parent=OE9A061692;Name=OE9A061692T1;product=OE9A061692P1
OE9A113555	1468.63	2.39453	0.228935	10.4594	1.32634e-25	7.40494e-23	OE9A113555	ID=OE9A113555T1;Parent=OE9A113555;Name=OE9A113555T1;product=OE9A113555P1;Description=receptor kinase HSL1;Ontology_term=GO:0004674%2C GO:0005515%2C GO:0005524%2C GO:0006468%2C GO:0009069%2C GO:0016021%2C GO:0016491%2C GO:0044464%2C GO:0050794
OE9A013985	6013.73	2.38484	0.36033	6.61849	3.62877e-11	3.87069e-09	OE9A013985	ID=OE9A013985T1;Parent=OE9A013985;Name=OE9A013985T1;product=OE9A013985P1;Description=zinc finger ZAT10-like;Ontology_term=GO:0046872
OE9A072034	191.365	2.38122	0.251506	9.46785	2.85667e-21	1.13574e-18	OE9A072034	ID=OE9A072034T1;Parent=OE9A072034;Name=OE9A072034T1;product=OE9A072034P1;Description=U-box domain-containing 17;Ontology_term=GO:0004842%2C GO:0005634%2C GO:0005737%2C GO:0009814%2C GO:0016567
OE9A022845	291.099	2.3765	0.406228	5.85017	4.91058e-09	3.78981e-07	OE9A022845	ID=OE9A022845T1;Parent=OE9A022845;Name=OE9A022845T1;product=OE9A022845P1
OE9A101726	292.58	2.37477	0.388213	6.11719	9.52387e-10	8.22061e-08	OE9A101726	ID=OE9A101726T1;Parent=OE9A101726;Name=OE9A101726T1;product=OE9A101726P1;Description=F-box At1g78100;Ontology_term=GO:0005515
OE9A110260	82.387	2.37426	0.378951	6.26535	3.71993e-10	3.41297e-08	OE9A110260	ID=OE9A110260T1;Parent=OE9A110260;Name=OE9A110260T1;product=OE9A110260P1
OE9A120256	72.9609	2.37387	0.605138	3.92286	8.75025e-05	0.00304115	OE9A120256	ID=OE9A120256T1;Parent=OE9A120256;Name=OE9A120256T1;product=OE9A120256P1;Description=serine threonine- kinase At5g01020-like;Ontology_term=GO:0004672%2C GO:0005515%2C GO:0005524%2C GO:0006468
OE9A039679	135.358	2.37067	0.424895	5.57943	2.41312e-08	1.68405e-06	OE9A039679	ID=OE9A039679T1;Parent=OE9A039679;Name=OE9A039679T1;product=OE9A039679P1
OE9A101798	284.91	2.36774	0.6814	3.47482	0.000511196	0.0146279	OE9A101798	ID=OE9A101798T1;Parent=OE9A101798;Name=OE9A101798T1;product=OE9A101798P1;Description=isoeugenol synthase 1-like;Ontology_term=GO:0009813%2C GO:0047526%2C GO:0055114
OE9A049495	120.355	2.36569	0.636938	3.71416	0.00020388	0.00641464	OE9A049495	ID=OE9A049495T1;Parent=OE9A049495;Name=OE9A049495T1;product=OE9A049495P1;Description=NAC domain-containing 104;Ontology_term=GO:0003677%2C GO:0005634%2C GO:0006355
OE9A072199	299.662	2.36285	0.260225	9.08004	1.08539e-19	3.65138e-17	OE9A072199	ID=OE9A072199T1;Parent=OE9A072199;Name=OE9A072199T1;product=OE9A072199P1;Description=ACT domain-containing ACR10;Ontology_term=GO:0008152%2C GO:0016597
OE9A045751	13.9677	2.35959	0.774178	3.04786	0.00230478	0.0506512	OE9A045751	ID=OE9A045751T1;Parent=OE9A045751;Name=OE9A045751T1;product=OE9A045751P1;Description=involved in transcript turnover and stability;Ontology_term=GO:0008270%2C GO:0016021
OE9A056063	125.529	2.35511	0.840388	2.8024	0.00507233	0.0912254	OE9A056063	ID=OE9A056063T1;Parent=OE9A056063;Name=OE9A056063T1;product=OE9A056063P1;Description=ethylene-responsive transcription factor ERF003-like;Ontology_term=GO:0003677%2C GO:0003700%2C GO:0005634%2C GO:0005667%2C GO:0006355%2C GO:0045449
OE9A040726	9507.98	2.35239	0.295781	7.95314	1.81842e-15	3.26817e-13	OE9A040726	ID=OE9A040726T1;Parent=OE9A040726;Name=OE9A040726T1;product=OE9A040726P1;Description=zinc finger ZAT10-like;Ontology_term=GO:0046872
OE9A037327	10626.1	2.35229	0.308065	7.63569	2.24619e-14	3.68374e-12	OE9A037327	ID=OE9A037327T1;Parent=OE9A037327;Name=OE9A037327T1;product=OE9A037327P1;Description=NDR1 HIN1 3;Ontology_term=GO:0016021
OE9A057874	236.434	2.35078	0.339981	6.91445	4.69678e-12	5.89682e-10	OE9A057874	ID=OE9A057874T1;Parent=OE9A057874;Name=OE9A057874T1;product=OE9A057874P1;Description=SRC2-like;Ontology_term=GO:0005515
OE9A045980	31.2012	2.34674	0.720848	3.25553	0.00113179	0.028611	OE9A045980	ID=OE9A045980T1;Parent=OE9A045980;Name=OE9A045980T1;product=OE9A045980P1;Description=U-box domain-containing 27-like;Ontology_term=GO:0004842%2C GO:0005488%2C GO:0016567
OE9A083464	102.772	2.33668	0.63296	3.69167	0.000222789	0.00694924	OE9A083464	ID=OE9A083464T1;Parent=OE9A083464;Name=OE9A083464T1;product=OE9A083464P1
OE9A071875	55.5518	2.33617	0.555092	4.20861	2.56948e-05	0.0010341	OE9A071875	ID=OE9A071875T1;Parent=OE9A071875;Name=OE9A071875T1;product=OE9A071875P1;Description=O-fucosyltransferase 19-like;Ontology_term=GO:0016021
OE9A087760	1007.58	2.32888	0.29073	8.01044	1.143e-15	2.12711e-13	OE9A087760	ID=OE9A087760T1;Parent=OE9A087760;Name=OE9A087760T1;product=OE9A087760P1;Description=berberine bridge enzyme-like 21;Ontology_term=GO:0016614%2C GO:0050660%2C GO:0055114
OE9A042127	40.2033	2.32854	0.815691	2.85468	0.00430797	0.0809751	OE9A042127	ID=OE9A042127T1;Parent=OE9A042127;Name=OE9A042127T1;product=OE9A042127P1;Description=G-type lectin S-receptor-like serine threonine- kinase LECRK3;Ontology_term=GO:0004672%2C GO:0005524%2C GO:0006468%2C GO:0016020
OE9A087932	86.9584	2.32061	0.483249	4.8021	1.57009e-06	8.17924e-05	OE9A087932	ID=OE9A087932T1;Parent=OE9A087932;Name=OE9A087932T1;product=OE9A087932P1;Description=verticillium wilt disease resistance;Ontology_term=GO:0005515%2C GO:0016020
OE9A110374	107.771	2.31889	0.359023	6.4589	1.05466e-10	1.03262e-08	OE9A110374	ID=OE9A110374T1;Parent=OE9A110374;Name=OE9A110374T1;product=OE9A110374P1;Description=GDSL esterase lipase At5g55050-like;Ontology_term=GO:0016788
OE9A028936	161.568	2.31831	0.396105	5.85277	4.83466e-09	3.75329e-07	OE9A028936	ID=OE9A028936T1;Parent=OE9A028936;Name=OE9A028936T1;product=OE9A028936P1;Description=oxalate-- ligase-like;Ontology_term=GO:0009805%2C GO:0009809%2C GO:0009811%2C GO:0016207
OE9A010897	74.454	2.31355	0.513875	4.50217	6.72628e-06	0.000309102	OE9A010897	ID=OE9A010897T1;Parent=OE9A010897;Name=OE9A010897T1;product=OE9A010897P1;Description=NDR1 HIN1 13;Ontology_term=GO:0016020
OE9A041636	1248.91	2.3105	0.217365	10.6296	2.17064e-26	1.38921e-23	OE9A041636	ID=OE9A041636T1;Parent=OE9A041636;Name=OE9A041636T1;product=OE9A041636P1;Description=U-box domain-containing 17;Ontology_term=GO:0004842%2C GO:0005515%2C GO:0005634%2C GO:0005737%2C GO:0009814%2C GO:0016567%2C GO:0016874
OE9A098481	299.146	2.30634	0.380802	6.05652	1.39099e-09	1.16986e-07	OE9A098481	ID=OE9A098481T1;Parent=OE9A098481;Name=OE9A098481T1;product=OE9A098481P1;Description=probable glutathione S-transferase;Ontology_term=GO:0004364%2C GO:0005515%2C GO:0005737%2C GO:0006749%2C GO:0006803%2C GO:0009407
OE9A100636	394.709	2.29912	0.369091	6.22913	4.69019e-10	4.21475e-08	OE9A100636	ID=OE9A100636T1;Parent=OE9A100636;Name=OE9A100636T1;product=OE9A100636P1;Description=late embryogenesis abundant At1g64065-like;Ontology_term=GO:0016020
OE9A101792	2009.32	2.29546	0.347062	6.61398	3.74133e-11	3.9746e-09	OE9A101792	ID=OE9A101792T1;Parent=OE9A101792;Name=OE9A101792T1;product=OE9A101792P1;Description=zinc finger ZAT10-like;Ontology_term=GO:0046872
OE9A100384	81.0705	2.29344	0.453387	5.05845	4.22669e-07	2.46463e-05	OE9A100384	ID=OE9A100384T1;Parent=OE9A100384;Name=OE9A100384T1;product=OE9A100384P1;Description=phospholipid-transporting ATPase 1;Ontology_term=GO:0000287%2C GO:0004012%2C GO:0005524%2C GO:0005886%2C GO:0006812%2C GO:0015917%2C GO:0016021%2C GO:0045332
OE9A059885	14.8049	2.28421	0.724616	3.15231	0.00161985	0.0382581	OE9A059885	ID=OE9A059885T1;Parent=OE9A059885;Name=OE9A059885T1;product=OE9A059885P1;Description=ankyrin repeat-containing BDA1-like;Ontology_term=GO:0005515%2C GO:0016021
OE9A000364	65.9496	2.28231	0.524382	4.35239	1.34663e-05	0.000576436	OE9A000364	ID=OE9A000364T1;Parent=OE9A000364;Name=OE9A000364T1;product=OE9A000364P1;Description=lignin-forming anionic peroxidase;Ontology_term=GO:0004601%2C GO:0005576%2C GO:0006804%2C GO:0006979%2C GO:0020037%2C GO:0042744%2C GO:0046872%2C GO:0055114%2C GO:0098869
OE9A088017	1277.49	2.28199	0.717404	3.18091	0.00146815	0.0353434	OE9A088017	ID=OE9A088017T1;Parent=OE9A088017;Name=OE9A088017T1;product=OE9A088017P1;Description=monothiol glutaredoxin-S2-like;Ontology_term=GO:0005623%2C GO:0006118%2C GO:0009055%2C GO:0015035%2C GO:0016021%2C GO:0045454%2C GO:0055114
OE9A021246	45.681	2.27663	0.550791	4.13338	3.57474e-05	0.00139586	OE9A021246	ID=OE9A021246T1;Parent=OE9A021246;Name=OE9A021246T1;product=OE9A021246P1
OE9A118237	26.6635	2.27626	0.74073	3.07299	0.00211927	0.0472068	OE9A118237	ID=OE9A118237T1;Parent=OE9A118237;Name=OE9A118237T1;product=OE9A118237P1
OE9A083973	338.397	2.27605	0.334628	6.80174	1.03362e-11	1.2001e-09	OE9A083973	ID=OE9A083973T1;Parent=OE9A083973;Name=OE9A083973T1;product=OE9A083973P1;Description=receptor kinase HAIKU2;Ontology_term=GO:0004674%2C GO:0005515%2C GO:0005524%2C GO:0005886%2C GO:0006979%2C GO:0009069%2C GO:0009845%2C GO:0016021%2C GO:0046777%2C GO:0070825
OE9A071166	741.822	2.27301	0.306285	7.42123	1.1604e-13	1.78064e-11	OE9A071166	ID=OE9A071166T1;Parent=OE9A071166;Name=OE9A071166T1;product=OE9A071166P1;Description=RING-H2 finger ATL52-like;Ontology_term=GO:0004842%2C GO:0005515%2C GO:0008270%2C GO:0016020%2C GO:0016567
OE9A016967	133.578	2.27231	0.584516	3.88751	0.000101279	0.0034785	OE9A016967	ID=OE9A016967T1;Parent=OE9A016967;Name=OE9A016967T1;product=OE9A016967P1;Description=ethylene-responsive transcription factor ERF014-like;Ontology_term=GO:0003677%2C GO:0003700%2C GO:0005667%2C GO:0006355%2C GO:0045449
OE9A025146	115.553	2.26828	0.469623	4.83	1.36531e-06	7.25216e-05	OE9A025146	ID=OE9A025146T1;Parent=OE9A025146;Name=OE9A025146T1;product=OE9A025146P1;Description=mitogen-activated kinase 3;Ontology_term=GO:0000165%2C GO:0004707%2C GO:0005524%2C GO:0005622%2C GO:0007178%2C GO:0009069
OE9A061517	201.587	2.26477	0.340186	6.65744	2.78631e-11	3.00876e-09	OE9A061517	ID=OE9A061517T1;Parent=OE9A061517;Name=OE9A061517T1;product=OE9A061517P1;Description=LEAF RUST 10 DISEASE-RESISTANCE LOCUS RECEPTOR-LIKE PROTEIN KINASE-like;Ontology_term=GO:0004672%2C GO:0005524%2C GO:0006468
OE9A065545	3357.65	2.26355	0.24262	9.3296	1.06269e-20	3.98355e-18	OE9A065545	ID=OE9A065545T1;Parent=OE9A065545;Name=OE9A065545T1;product=OE9A065545P1;Description=inorganic phosphate transporter 1-4-like;Ontology_term=GO:0005315%2C GO:0006817%2C GO:0016021%2C GO:0055085
OE9A103895	417.429	2.26192	0.333478	6.78283	1.17848e-11	1.35628e-09	OE9A103895	ID=OE9A103895T1;Parent=OE9A103895;Name=OE9A103895T1;product=OE9A103895P1;Description=rust resistance kinase Lr10-like;Ontology_term=GO:0004672%2C GO:0005524%2C GO:0006468
OE9A016113	28.9424	2.25692	0.573172	3.9376	8.23009e-05	0.00288328	OE9A016113	ID=OE9A016113T1;Parent=OE9A016113;Name=OE9A016113T1;product=OE9A016113P1;Description=poly polymerase;Ontology_term=GO:0005730
OE9A008801	1838.63	2.25685	0.286507	7.87709	3.35083e-15	5.94094e-13	OE9A008801	ID=OE9A008801T1;Parent=OE9A008801;Name=OE9A008801T1;product=OE9A008801P1;Description=E3 ubiquitin- ligase RING1-like;Ontology_term=GO:0005515%2C GO:0008270
OE9A042020	618.317	2.25634	0.317327	7.11047	1.15649e-12	1.54829e-10	OE9A042020	ID=OE9A042020T1;Parent=OE9A042020;Name=OE9A042020T1;product=OE9A042020P1;Description=Beta-1,4-mannosyl-glyco 4-beta-N-acetylglucosaminyltransferase;Ontology_term=GO:0003830%2C GO:0006487%2C GO:0016021
OE9A094107	473.79	2.25057	0.297944	7.55368	4.23135e-14	6.77016e-12	OE9A094107	ID=OE9A094107T1;Parent=OE9A094107;Name=OE9A094107T1;product=OE9A094107P1;Description=probable disease resistance At5g63020;Ontology_term=GO:0043531
OE9A073215	278.18	2.2493	0.291217	7.72379	1.12919e-14	1.88725e-12	OE9A073215	ID=OE9A073215T1;Parent=OE9A073215;Name=OE9A073215T1;product=OE9A073215P1
OE9A105546	178.053	2.24909	0.342732	6.56224	5.30052e-11	5.47582e-09	OE9A105546	ID=OE9A105546T1;Parent=OE9A105546;Name=OE9A105546T1;product=OE9A105546P1;Description=probable calcium-binding CML18;Ontology_term=GO:0005509
OE9A110626	6168.26	2.2443	0.360377	6.22765	4.73486e-10	4.24037e-08	OE9A110626	ID=OE9A110626T1;Parent=OE9A110626;Name=OE9A110626T1;product=OE9A110626P1;Description=unnamed protein product;Ontology_term=GO:0016021
OE9A073718	2132.66	2.24323	0.196808	11.398	4.27617e-30	5.1003e-27	OE9A073718	ID=OE9A073718T1;Parent=OE9A073718;Name=OE9A073718T1;product=OE9A073718P1;Description=cytochrome b561 and DOMON domain-containing At5g47530-like;Ontology_term=GO:0016021%2C GO:0055114
OE9A042951	1411.24	2.23983	0.235546	9.50909	1.92339e-21	7.88592e-19	OE9A042951	ID=OE9A042951T1;Parent=OE9A042951;Name=OE9A042951T1;product=OE9A042951P1;Description=probable LRR receptor-like serine threonine- kinase At2g24230;Ontology_term=GO:0004672%2C GO:0005515%2C GO:0005524%2C GO:0006468%2C GO:0016020
OE9A041715	74.7159	2.23733	0.508073	4.40357	1.06482e-05	0.000468808	OE9A041715	ID=OE9A041715T1;Parent=OE9A041715;Name=OE9A041715T1;product=OE9A041715P1
OE9A038477	4878.98	2.23709	0.262198	8.53205	1.43771e-17	3.37851e-15	OE9A038477	ID=OE9A038477T1;Parent=OE9A038477;Name=OE9A038477T1;product=OE9A038477P1;Description=nudix hydrolase 17, mitochondrial-like;Ontology_term=GO:0016787
OE9A026802	136.387	2.23605	0.365685	6.1147	9.67386e-10	8.29549e-08	OE9A026802	ID=OE9A026802T1;Parent=OE9A026802;Name=OE9A026802T1;product=OE9A026802P1
OE9A088503	24.5947	2.23248	0.679697	3.28452	0.00102157	0.0262581	OE9A088503	ID=OE9A088503T1;Parent=OE9A088503;Name=OE9A088503T1;product=OE9A088503P1
OE9A076402	436.488	2.23129	0.324118	6.88417	5.81248e-12	7.16053e-10	OE9A076402	ID=OE9A076402T1;Parent=OE9A076402;Name=OE9A076402T1;product=OE9A076402P1;Description=BTB POZ domain-containing At5g41330-like;Ontology_term=GO:0005515%2C GO:0051260
OE9A050550	724.397	2.23076	0.302997	7.36229	1.80777e-13	2.7262e-11	OE9A050550	ID=OE9A050550T1;Parent=OE9A050550;Name=OE9A050550T1;product=OE9A050550P1;Description=beta-1,4-mannosyl-glyco 4-beta-N-acetylglucosaminyltransferase-like;Ontology_term=GO:0003830%2C GO:0006487%2C GO:0016021
OE9A049987	50.3232	2.23037	0.49671	4.49029	7.1125e-06	0.000324577	OE9A049987	ID=OE9A049987T1;Parent=OE9A049987;Name=OE9A049987T1;product=OE9A049987P1;Description=NDR1-like;Ontology_term=GO:0005886
OE9A079040	23.523	2.22533	0.749465	2.96922	0.00298557	0.0615407	OE9A079040	ID=OE9A079040T1;Parent=OE9A079040;Name=OE9A079040T1;product=OE9A079040P1
OE9A043283	105.902	2.21758	0.686191	3.23172	0.00123047	0.0306579	OE9A043283	ID=OE9A043283T1;Parent=OE9A043283;Name=OE9A043283T1;product=OE9A043283P1;Description=nicotianamine synthase-like;Ontology_term=GO:0030410%2C GO:0030418
OE9A093828	15.0186	2.21724	0.765775	2.89543	0.00378644	0.0734341	OE9A093828	ID=OE9A093828T1;Parent=OE9A093828;Name=OE9A093828T1;product=OE9A093828P1;Description=plastidial lipoyltransferase 2;Ontology_term=GO:0005737%2C GO:0006464%2C GO:0009107%2C GO:0016415%2C GO:0042967
OE9A093682	134.967	2.21597	0.64245	3.44925	0.00056214	0.0158268	OE9A093682	ID=OE9A093682T1;Parent=OE9A093682;Name=OE9A093682T1;product=OE9A093682P1
OE9A022893	318.328	2.21074	0.43073	5.13253	2.85875e-07	1.71264e-05	OE9A022893	ID=OE9A022893T1;Parent=OE9A022893;Name=OE9A022893T1;product=OE9A022893P1;Description=NRT1 PTR FAMILY -like;Ontology_term=GO:0005215%2C GO:0006810%2C GO:0016020
OE9A074687	395.922	2.2103	0.416151	5.3113	1.08849e-07	6.94938e-06	OE9A074687	ID=OE9A074687T1;Parent=OE9A074687;Name=OE9A074687T1;product=OE9A074687P1;Description=mitochondrial uncoupling 5-like;Ontology_term=GO:0003735%2C GO:0005840%2C GO:0006412%2C GO:0006839%2C GO:0016021%2C GO:0031966%2C GO:0042254%2C GO:0055085
OE9A094681	2696.21	2.20916	0.353177	6.25509	3.97284e-10	3.60717e-08	OE9A094681	ID=OE9A094681T1;Parent=OE9A094681;Name=OE9A094681T1;product=OE9A094681P1
OE9A055208	15.1568	2.20896	0.787256	2.80589	0.00501771	0.0905535	OE9A055208	ID=OE9A055208T1;Parent=OE9A055208;Name=OE9A055208T1;product=OE9A055208P1;Description=L-type lectin-domain containing receptor kinase -like;Ontology_term=GO:0004672%2C GO:0005524%2C GO:0006468%2C GO:0016020%2C GO:0030246
OE9A076805	326.939	2.20599	0.663708	3.32374	0.000888183	0.023325	OE9A076805	ID=OE9A076805T1;Parent=OE9A076805;Name=OE9A076805T1;product=OE9A076805P1;Description=monothiol glutaredoxin-S1-like;Ontology_term=GO:0005623%2C GO:0006118%2C GO:0009055%2C GO:0015035%2C GO:0045454%2C GO:0055114
OE9A098085	58.7765	2.20436	0.599937	3.67433	0.000238478	0.00738803	OE9A098085	ID=OE9A098085T1;Parent=OE9A098085;Name=OE9A098085T1;product=OE9A098085P1;Description=receptor kinase 5;Ontology_term=GO:0004672%2C GO:0005515%2C GO:0005524%2C GO:0006468%2C GO:0016020
OE9A079404	212.409	2.20396	0.465982	4.72971	2.24837e-06	0.000112376	OE9A079404	ID=OE9A079404T1;Parent=OE9A079404;Name=OE9A079404T1;product=OE9A079404P1;Description=mitogen-activated kinase kinase kinase 3-like;Ontology_term=GO:0004672%2C GO:0005524%2C GO:0006468
OE9A107039	1327.49	2.19683	0.344094	6.38439	1.72087e-10	1.6243e-08	OE9A107039	ID=OE9A107039T1;Parent=OE9A107039;Name=OE9A107039T1;product=OE9A107039P1
OE9A106204	195.912	2.19655	0.488645	4.49519	6.95083e-06	0.000318863	OE9A106204	ID=OE9A106204T1;Parent=OE9A106204;Name=OE9A106204T1;product=OE9A106204P1;Description=anthocyanidin 3-O-glucosyltransferase 2-like;Ontology_term=GO:0008152%2C GO:0016021%2C GO:0016758
OE9A057570	20.4365	2.19491	0.749589	2.92815	0.00340982	0.067783	OE9A057570	ID=OE9A057570T1;Parent=OE9A057570;Name=OE9A057570T1;product=OE9A057570P1
OE9A058378	99.8768	2.19473	0.403847	5.43456	5.49306e-08	3.66763e-06	OE9A058378	ID=OE9A058378T1;Parent=OE9A058378;Name=OE9A058378T1;product=OE9A058378P1;Description=PREDICTED: uncharacterized protein LOC100243237;Ontology_term=GO:0016021
OE9A107360	25.14	2.19358	0.754986	2.90545	0.00366724	0.0716593	OE9A107360	ID=OE9A107360T1;Parent=OE9A107360;Name=OE9A107360T1;product=OE9A107360P1;Description=low affinity sulfate transporter 3-like;Ontology_term=GO:0008271%2C GO:0016021%2C GO:1902358
OE9A012920	10.7155	2.19282	0.744102	2.94693	0.00320949	0.0649322	OE9A012920	ID=OE9A012920T1;Parent=OE9A012920;Name=OE9A012920T1;product=OE9A012920P1;Description=uncharacterized protein LOC111401528;Ontology_term=GO:0004805%2C GO:0005982%2C GO:0005985%2C GO:0005992%2C GO:0016311
OE9A064672	78.2329	2.1922	0.476452	4.6011	4.20272e-06	0.000200873	OE9A064672	ID=OE9A064672T1;Parent=OE9A064672;Name=OE9A064672T1;product=OE9A064672P1;Description=C2-DOMAIN ABA-RELATED 4-like;Ontology_term=GO:0005515
OE9A089778	819.998	2.19173	0.206876	10.5944	3.16291e-26	1.97607e-23	OE9A089778	ID=OE9A089778T1;Parent=OE9A089778;Name=OE9A089778T1;product=OE9A089778P1;Description=GATA transcription factor 5-like;Ontology_term=GO:0003700%2C GO:0005634%2C GO:0005667%2C GO:0008270%2C GO:0043565%2C GO:0045449%2C GO:0045893
OE9A072394	71.7636	2.18976	0.50523	4.33418	1.46303e-05	0.000623213	OE9A072394	ID=OE9A072394T1;Parent=OE9A072394;Name=OE9A072394T1;product=OE9A072394P1
OE9A040493	217.723	2.18893	0.416042	5.26132	1.43023e-07	9.02143e-06	OE9A040493	ID=OE9A040493T1;Parent=OE9A040493;Name=OE9A040493T1;product=OE9A040493P1;Description=UDP-rhamnose:rhamnosyltransferase 1;Ontology_term=GO:0009813%2C GO:0016021%2C GO:0043231%2C GO:0052696%2C GO:0080043%2C GO:0080044
OE9A113001	173.776	2.18797	0.35618	6.14288	8.10377e-10	7.0881e-08	OE9A113001	ID=OE9A113001T1;Parent=OE9A113001;Name=OE9A113001T1;product=OE9A113001P1;Description=transcription factor MYB44-like;Ontology_term=GO:0003677
OE9A076753	17.9664	2.18538	0.773356	2.82584	0.00471571	0.0865923	OE9A076753	ID=OE9A076753T1;Parent=OE9A076753;Name=OE9A076753T1;product=OE9A076753P1;Description=exocyst complex component EXO70A1-like;Ontology_term=GO:0000145%2C GO:0006887
OE9A084101	80.676	2.18422	0.641092	3.40704	0.000656725	0.0180068	OE9A084101	ID=OE9A084101T1;Parent=OE9A084101;Name=OE9A084101T1;product=OE9A084101P1;Description=cannabidiolic acid synthase-like;Ontology_term=GO:0016614%2C GO:0050660%2C GO:0055114
OE9A094863	26.3886	2.17947	0.773657	2.81709	0.00484602	0.088244	OE9A094863	ID=OE9A094863T1;Parent=OE9A094863;Name=OE9A094863T1;product=OE9A094863P1;Description=uncharacterized protein LOC111372000;Ontology_term=GO:0016021
OE9A073799	316.256	2.16745	0.277677	7.80565	5.9197e-15	1.01525e-12	OE9A073799	ID=OE9A073799T1;Parent=OE9A073799;Name=OE9A073799T1;product=OE9A073799P1;Description=GSH-induced LITAF domain;Ontology_term=GO:0005886%2C GO:0016021%2C GO:0034051
OE9A061645	170.035	2.16295	0.446625	4.84288	1.27971e-06	6.82512e-05	OE9A061645	ID=OE9A061645T1;Parent=OE9A061645;Name=OE9A061645T1;product=OE9A061645P1;Description=UPF0481 At3g47200-like;Ontology_term=GO:0008168%2C GO:0016021%2C GO:0032259
OE9A043608	1632.16	2.1596	0.326721	6.60992	3.84517e-11	4.0521e-09	OE9A043608	ID=OE9A043608T1;Parent=OE9A043608;Name=OE9A043608T1;product=OE9A043608P1;Description=linoleate 13S-lipoxygenase 3-1, chloroplastic;Ontology_term=GO:0005515%2C GO:0009534%2C GO:0009570%2C GO:0016165%2C GO:0031408%2C GO:0046872%2C GO:0055114
OE9A053282	238.33	2.15855	0.454425	4.75006	2.03355e-06	0.000103211	OE9A053282	ID=OE9A053282T1;Parent=OE9A053282;Name=OE9A053282T1;product=OE9A053282P1;Description=anthocyanidin 3-O-glucosyltransferase 2-like;Ontology_term=GO:0008152%2C GO:0016021%2C GO:0016758
OE9A066307	5662.71	2.15654	0.379459	5.6832	1.32196e-08	9.50364e-07	OE9A066307	ID=OE9A066307T1;Parent=OE9A066307;Name=OE9A066307T1;product=OE9A066307P1;Description=ethylene-responsive transcription factor 4-like;Ontology_term=GO:0003677%2C GO:0003700%2C GO:0005667%2C GO:0006355%2C GO:0045449
OE9A098652	695.667	2.15631	0.322862	6.67875	2.40993e-11	2.62393e-09	OE9A098652	ID=OE9A098652T1;Parent=OE9A098652;Name=OE9A098652T1;product=OE9A098652P1
OE9A107440	289.711	2.14969	0.356275	6.03378	1.60166e-09	1.32998e-07	OE9A107440	ID=OE9A107440T1;Parent=OE9A107440;Name=OE9A107440T1;product=OE9A107440P1;Description=universal stress A;Ontology_term=GO:0006950
OE9A072632	93.0941	2.149	0.564823	3.80473	0.00014196	0.00468558	OE9A072632	ID=OE9A072632T1;Parent=OE9A072632;Name=OE9A072632T1;product=OE9A072632P1;Description=LEAF RUST 10 DISEASE-RESISTANCE LOCUS RECEPTOR-LIKE PROTEIN KINASE-like;Ontology_term=GO:0004674%2C GO:0005524%2C GO:0006468%2C GO:0009069
OE9A045301	6857.97	2.14845	0.379173	5.66615	1.46043e-08	1.04135e-06	OE9A045301	ID=OE9A045301T1;Parent=OE9A045301;Name=OE9A045301T1;product=OE9A045301P1;Description=ethylene-responsive transcription factor 4-like;Ontology_term=GO:0003677%2C GO:0003700%2C GO:0005667%2C GO:0006355%2C GO:0045449
OE9A019029	202.883	2.14626	0.503693	4.26105	2.03467e-05	0.000834215	OE9A019029	ID=OE9A019029T1;Parent=OE9A019029;Name=OE9A019029T1;product=OE9A019029P1;Description=ethylene-responsive transcription factor ERF027;Ontology_term=GO:0003677%2C GO:0003700%2C GO:0005667%2C GO:0006355%2C GO:0045449
OE9A027777	1964.45	2.14024	0.300009	7.13391	9.75574e-13	1.32638e-10	OE9A027777	ID=OE9A027777T1;Parent=OE9A027777;Name=OE9A027777T1;product=OE9A027777P1;Description=U-box domain-containing 17;Ontology_term=GO:0004842%2C GO:0005515%2C GO:0005634%2C GO:0005737%2C GO:0009814%2C GO:0016567
OE9A064738	19.9737	2.13849	0.653897	3.27037	0.00107407	0.0274098	OE9A064738	ID=OE9A064738T1;Parent=OE9A064738;Name=OE9A064738T1;product=OE9A064738P1;Description=pyruvate decarboxylase 2;Ontology_term=GO:0000287%2C GO:0016831%2C GO:0030976
OE9A058417	33.9813	2.13196	0.632023	3.37323	0.000742922	0.0199941	OE9A058417	ID=OE9A058417T1;Parent=OE9A058417;Name=OE9A058417T1;product=OE9A058417P1;Description=uncharacterized protein LOC111371543 isoform X1;Ontology_term=GO:0016021
OE9A093962	63.0326	2.12797	0.409728	5.19362	2.06241e-07	1.27036e-05	OE9A093962	ID=OE9A093962T1;Parent=OE9A093962;Name=OE9A093962T1;product=OE9A093962P1
OE9A088204	128.65	2.1231	0.539068	3.93846	8.20069e-05	0.00287682	OE9A088204	ID=OE9A088204T1;Parent=OE9A088204;Name=OE9A088204T1;product=OE9A088204P1;Description=probable WRKY transcription factor 70;Ontology_term=GO:0003700%2C GO:0005667%2C GO:0006355%2C GO:0043565%2C GO:0045449
OE9A103543	674.082	2.11689	0.341701	6.19516	5.8225e-10	5.16157e-08	OE9A103543	ID=OE9A103543T1;Parent=OE9A103543;Name=OE9A103543T1;product=OE9A103543P1
OE9A052982	69.1951	2.11105	0.641974	3.28837	0.00100769	0.0260255	OE9A052982	ID=OE9A052982T1;Parent=OE9A052982;Name=OE9A052982T1;product=OE9A052982P1;Description=AAA-ATPase ASD, mitochondrial-like;Ontology_term=GO:0005524%2C GO:0016021
OE9A016506	27.2843	2.10789	0.672692	3.13351	0.00172727	0.0402162	OE9A016506	ID=OE9A016506T1;Parent=OE9A016506;Name=OE9A016506T1;product=OE9A016506P1;Description=G-type lectin S-receptor-like serine threonine- kinase LECRK3;Ontology_term=GO:0004674%2C GO:0005524%2C GO:0005886%2C GO:0006468%2C GO:0009069%2C GO:0016021%2C GO:0048544
OE9A119192	92.9219	2.10773	0.713844	2.95265	0.00315064	0.0639231	OE9A119192	ID=OE9A119192T1;Parent=OE9A119192;Name=OE9A119192T1;product=OE9A119192P1;Description=leucine-rich repeat extensin 3;Ontology_term=GO:0030001%2C GO:0046872
OE9A113952	264.121	2.09875	0.388365	5.40407	6.51462e-08	4.33867e-06	OE9A113952	ID=OE9A113952T1;Parent=OE9A113952;Name=OE9A113952T1;product=OE9A113952P1;Description=NRT1 PTR FAMILY -like;Ontology_term=GO:0005215%2C GO:0006810%2C GO:0016021
OE9A000336	1284.21	2.09664	0.271665	7.71776	1.18394e-14	1.96624e-12	OE9A000336	ID=OE9A000336T1;Parent=OE9A000336;Name=OE9A000336T1;product=OE9A000336P1;Description=PHLOEM PROTEIN 2-LIKE A10;Ontology_term=GO:0016021
OE9A106142	24.0306	2.09627	0.712435	2.9424	0.00325674	0.065385	OE9A106142	ID=OE9A106142T1;Parent=OE9A106142;Name=OE9A106142T1;product=OE9A106142P1
OE9A017022	42.8874	2.09579	0.720974	2.90688	0.0036505	0.0715378	OE9A017022	ID=OE9A017022T1;Parent=OE9A017022;Name=OE9A017022T1;product=OE9A017022P1;Description=glycerophosphodiester phosphodiesterase GDPDL3-like;Ontology_term=GO:0006071%2C GO:0008889%2C GO:0009395%2C GO:0016021%2C GO:0046486
OE9A046042	226.933	2.09293	0.343117	6.09976	1.06228e-09	8.9917e-08	OE9A046042	ID=OE9A046042T1;Parent=OE9A046042;Name=OE9A046042T1;product=OE9A046042P1;Description=ethylene-responsive transcription factor ERF027-like;Ontology_term=GO:0003677%2C GO:0003700%2C GO:0005667%2C GO:0006355%2C GO:0045449
OE9A082565	48.7244	2.09128	0.591623	3.53482	0.000408051	0.0119634	OE9A082565	ID=OE9A082565T1;Parent=OE9A082565;Name=OE9A082565T1;product=OE9A082565P1;Description=phosphatase family;Ontology_term=GO:0008152%2C GO:0016787
OE9A026617	206.794	2.08669	0.478102	4.36453	1.27399e-05	0.00055164	OE9A026617	ID=OE9A026617T1;Parent=OE9A026617;Name=OE9A026617T1;product=OE9A026617P1
OE9A011854	30.4309	2.08539	0.676259	3.08371	0.00204435	0.0458887	OE9A011854	ID=OE9A011854T1;Parent=OE9A011854;Name=OE9A011854T1;product=OE9A011854P1
OE9A009531	205.954	2.0848	0.505519	4.12408	3.72225e-05	0.00144297	OE9A009531	ID=OE9A009531T1;Parent=OE9A009531;Name=OE9A009531T1;product=OE9A009531P1;Description=uncharacterized protein At5g65660-like;Ontology_term=GO:0016021
OE9A078113	1220.32	2.083	0.323955	6.42992	1.27668e-10	1.23162e-08	OE9A078113	ID=OE9A078113T1;Parent=OE9A078113;Name=OE9A078113T1;product=OE9A078113P1;Description=rust resistance kinase Lr10-like;Ontology_term=GO:0004672%2C GO:0005524%2C GO:0006468%2C GO:0016020
OE9A122039	591.807	2.08244	0.315553	6.59933	4.13012e-11	4.33497e-09	OE9A122039	ID=OE9A122039T1;Parent=OE9A122039;Name=OE9A122039T1;product=OE9A122039P1
OE9A100031	139.561	2.08156	0.431886	4.8197	1.43776e-06	7.55025e-05	OE9A100031	ID=OE9A100031T1;Parent=OE9A100031;Name=OE9A100031T1;product=OE9A100031P1;Description=calmodulin-binding 60 C;Ontology_term=GO:0005516%2C GO:0006950%2C GO:0009617%2C GO:0050789
OE9A026115	63.0533	2.0808	0.710711	2.92777	0.00341407	0.0678046	OE9A026115	ID=OE9A026115T1;Parent=OE9A026115;Name=OE9A026115T1;product=OE9A026115P1;Description=serine threonine- kinase At5g01020-like;Ontology_term=GO:0004672%2C GO:0005515%2C GO:0005524%2C GO:0006468
OE9A077596	759.004	2.07831	0.31585	6.58005	4.7029e-11	4.89699e-09	OE9A077596	ID=OE9A077596T1;Parent=OE9A077596;Name=OE9A077596T1;product=OE9A077596P1;Description=probable CCR4-associated factor 1 homolog 11;Ontology_term=GO:0000289%2C GO:0003676%2C GO:0004535%2C GO:0005634%2C GO:0016740%2C GO:0030014%2C GO:0051252%2C GO:0090503
OE9A039709	56.902	2.07665	0.498489	4.16589	3.10147e-05	0.0012312	OE9A039709	ID=OE9A039709T1;Parent=OE9A039709;Name=OE9A039709T1;product=OE9A039709P1;Description=probable phosphatase 2C 49;Ontology_term=GO:0004722%2C GO:0006470%2C GO:0008287%2C GO:0046872
OE9A121458	364.917	2.07537	0.421258	4.92659	8.36765e-07	4.63222e-05	OE9A121458	ID=OE9A121458T1;Parent=OE9A121458;Name=OE9A121458T1;product=OE9A121458P1;Description=U-box domain-containing 16;Ontology_term=GO:0004842%2C GO:0005515%2C GO:0005634%2C GO:0005737%2C GO:0016567
OE9A082355	10276.3	2.07493	0.243203	8.53171	1.44205e-17	3.37851e-15	OE9A082355	ID=OE9A082355T1;Parent=OE9A082355;Name=OE9A082355T1;product=OE9A082355P1;Description=beta-amylase 1, chloroplastic;Ontology_term=GO:0005634%2C GO:0005829%2C GO:0005983%2C GO:0005985%2C GO:0016161
OE9A095378	757.492	2.06765	0.696169	2.97003	0.00297766	0.0614743	OE9A095378	ID=OE9A095378T1;Parent=OE9A095378;Name=OE9A095378T1;product=OE9A095378P1;Description=ethylene-responsive transcription factor ERF017-like;Ontology_term=GO:0003677%2C GO:0003700%2C GO:0005667%2C GO:0006355%2C GO:0045449
OE9A083330	176.535	2.06717	0.338688	6.10345	1.03801e-09	8.81473e-08	OE9A083330	ID=OE9A083330T1;Parent=OE9A083330;Name=OE9A083330T1;product=OE9A083330P1;Description=auxin-responsive SAUR32-like;Ontology_term=GO:0009733
OE9A046118	63.4891	2.06588	0.684226	3.0193	0.00253362	0.0544868	OE9A046118	ID=OE9A046118T1;Parent=OE9A046118;Name=OE9A046118T1;product=OE9A046118P1;Description=RNA-binding 38;Ontology_term=GO:0000166%2C GO:0003676
OE9A118656	33.8397	2.06377	0.586169	3.52077	0.0004303	0.0125456	OE9A118656	ID=OE9A118656T1;Parent=OE9A118656;Name=OE9A118656T1;product=OE9A118656P1;Description=clathrin assembly At4g40080;Ontology_term=GO:0005543
OE9A098762	1139.42	2.06215	0.334975	6.15612	7.45476e-10	6.54224e-08	OE9A098762	ID=OE9A098762T1;Parent=OE9A098762;Name=OE9A098762T1;product=OE9A098762P1;Description=probable CCR4-associated factor 1 homolog 11;Ontology_term=GO:0000289%2C GO:0003676%2C GO:0004535%2C GO:0005634%2C GO:0016740%2C GO:0030014%2C GO:0051252%2C GO:0090503
OE9A121330	3082.65	2.06145	0.253128	8.14388	3.82798e-16	7.38575e-14	OE9A121330	ID=OE9A121330T3;Parent=OE9A121330;Name=OE9A121330T3;product=OE9A121330P3
OE9A013077	503.186	2.05951	0.391493	5.26066	1.43542e-07	9.03249e-06	OE9A013077	ID=OE9A013077T1;Parent=OE9A013077;Name=OE9A013077T1;product=OE9A013077P1;Description=ankyrin repeat-containing BDA1-like;Ontology_term=GO:0005515%2C GO:0016021
OE9A090342	871.655	2.05802	0.363884	5.65569	1.55221e-08	1.10379e-06	OE9A090342	ID=OE9A090342T1;Parent=OE9A090342;Name=OE9A090342T1;product=OE9A090342P1
OE9A115035	1313.69	2.05758	0.40947	5.02497	5.03508e-07	2.91015e-05	OE9A115035	ID=OE9A115035T1;Parent=OE9A115035;Name=OE9A115035T1;product=OE9A115035P1;Description=bZIP transcription factor 11-like;Ontology_term=GO:0003700%2C GO:0005667%2C GO:0006355%2C GO:0043565%2C GO:0045449
OE9A116250	432.024	2.04577	0.421243	4.8565	1.19479e-06	6.41129e-05	OE9A116250	ID=OE9A116250T1;Parent=OE9A116250;Name=OE9A116250T1;product=OE9A116250P1
OE9A068562	690.627	2.04526	0.315721	6.47805	9.29163e-11	9.23532e-09	OE9A068562	ID=OE9A068562T1;Parent=OE9A068562;Name=OE9A068562T1;product=OE9A068562P1;md5=aa8e2d7bf0b6198d84614091a6e9d8b7;INTERPRO=<table><tr><th>DB</th><th>ID</th><th>Description</th></tr><tr><td>Gene3D</td><td>G3DSA:1.20.1540.10</td><td></td></tr><tr><td>PANTHER</td><td>PTHR22936</td><td></td></tr><tr><td>PANTHER</td><td>PTHR22936:SF35</td><td></td></tr><tr><td>Pfam</td><td>PF01694</td><td>Rhomboid family<…
OE9A068437	103.227	2.04125	0.373482	5.46546	4.61702e-08	3.11441e-06	OE9A068437	ID=OE9A068437T1;Parent=OE9A068437;Name=OE9A068437T1;product=OE9A068437P1
OE9A066090	787.481	2.04098	0.352648	5.78757	7.14111e-09	5.36913e-07	OE9A066090	ID=OE9A066090T1;Parent=OE9A066090;Name=OE9A066090T1;product=OE9A066090P1;Description=beta-glucosidase-like;Ontology_term=GO:0004553%2C GO:0005975
OE9A101725	90.2854	2.03767	0.49268	4.13589	3.53576e-05	0.00138475	OE9A101725	ID=OE9A101725T2;Parent=OE9A101725;Name=OE9A101725T2;product=OE9A101725P2;Description=mechanosensitive ion channel 10-like;Ontology_term=GO:0005886%2C GO:0006820%2C GO:0008381%2C GO:0050982%2C GO:0055085
OE9A110132	868.227	2.03385	0.289256	7.0313	2.04617e-12	2.6449e-10	OE9A110132	ID=OE9A110132T1;Parent=OE9A110132;Name=OE9A110132T1;product=OE9A110132P1;Description=PHLOEM PROTEIN 2-LIKE A10;Ontology_term=GO:0016021
OE9A074688	132.291	2.03255	0.455165	4.46552	7.98732e-06	0.000361981	OE9A074688	ID=OE9A074688T1;Parent=OE9A074688;Name=OE9A074688T1;product=OE9A074688P1
OE9A066326	44.3298	2.03227	0.618299	3.28687	0.00101308	0.0261132	OE9A066326	ID=OE9A066326T1;Parent=OE9A066326;Name=OE9A066326T1;product=OE9A066326P1;Description=receptor kinase HERK 1;Ontology_term=GO:0004672%2C GO:0005524%2C GO:0006468%2C GO:0016020
OE9A007230	447.388	2.02764	0.351019	5.77642	7.63061e-09	5.67216e-07	OE9A007230	ID=OE9A007230T1;Parent=OE9A007230;Name=OE9A007230T1;product=OE9A007230P1;Description=AP2 ERF and B3 domain-containing transcription factor RAV1;Ontology_term=GO:0003677%2C GO:0003700%2C GO:0005634%2C GO:0005667%2C GO:0006355%2C GO:0045449
OE9A102331	6546.65	2.02117	0.296668	6.8129	9.56519e-12	1.12552e-09	OE9A102331	ID=OE9A102331T1;Parent=OE9A102331;Name=OE9A102331T1;product=OE9A102331P1;Description=aspartic ase PCS1-like;Ontology_term=GO:0004190%2C GO:0006508%2C GO:0030163
OE9A023468	474.476	2.01376	0.357373	5.63488	1.75176e-08	1.24233e-06	OE9A023468	ID=OE9A023468T1;Parent=OE9A023468;Name=OE9A023468T1;product=OE9A023468P1;Description=LEAF RUST 10 DISEASE-RESISTANCE LOCUS RECEPTOR-LIKE PROTEIN KINASE-like;Ontology_term=GO:0004672%2C GO:0005524%2C GO:0006468
OE9A025476	2767.8	2.01164	0.650884	3.09063	0.00199731	0.0451221	OE9A025476	ID=OE9A025476T1;Parent=OE9A025476;Name=OE9A025476T1;product=OE9A025476P1;Description=basic endochitinase-like;Ontology_term=GO:0004568%2C GO:0005975%2C GO:0006032%2C GO:0008061%2C GO:0016998
OE9A005384	1023.7	2.01143	0.294731	6.82462	8.81607e-12	1.05152e-09	OE9A005384	ID=OE9A005384T1;Parent=OE9A005384;Name=OE9A005384T1;product=OE9A005384P1;Description=probable WRKY transcription factor 46;Ontology_term=GO:0003700%2C GO:0005667%2C GO:0006355%2C GO:0043565%2C GO:0045449
OE9A098891	154.952	2.00707	0.407105	4.93011	8.21835e-07	4.56885e-05	OE9A098891	ID=OE9A098891T1;Parent=OE9A098891;Name=OE9A098891T1;product=OE9A098891P1
OE9A073431	250.47	2.00253	0.330142	6.06566	1.31409e-09	1.10874e-07	OE9A073431	ID=OE9A073431T1;Parent=OE9A073431;Name=OE9A073431T1;product=OE9A073431P1
OE9A015899	22.7167	2.00204	0.666154	3.00537	0.00265257	0.0564785	OE9A015899	ID=OE9A015899T1;Parent=OE9A015899;Name=OE9A015899T1;product=OE9A015899P1;Description=Leucine-rich repeat;Ontology_term=GO:0005515%2C GO:0008152%2C GO:0016301
OE9A113416	3961.85	2.00169	0.255681	7.82885	4.92362e-15	8.61305e-13	OE9A113416	ID=OE9A113416T1;Parent=OE9A113416;Name=OE9A113416T1;product=OE9A113416P1;Description=UDP-glucuronate 4-epimerase 1;Ontology_term=GO:0005768%2C GO:0005802%2C GO:0005982%2C GO:0005985%2C GO:0009117%2C GO:0016021%2C GO:0050378%2C GO:0050662

## Sheet: ShinyGO UP FC >2
	Enrichment FDR	nGenes	Pathway Genes	Fold Enrichment	Pathways (click for details)	Genes
	5.8e-17	52	1164	4.6	GO:0003700 Transcription factor activity, sequence-specific DNA binding	OE9A000299 OE9A002219 OE9A004162 OE9A004421 OE9A005384 OE9A005875 OE9A007230 OE9A016967 OE9A019029 OE9A028341 OE9A031175 OE9A033879 OE9A042006 OE9A043316 OE9A043605 OE9A045301 OE9A046042 OE9A047454 OE9A051495 OE9A053907 OE9A056063 OE9A056651 OE9A060030 OE9A062775 OE9A066307 OE9A073161 OE9A075123 OE9A076184 OE9A079911 OE9A081134 OE9A081748 OE9A084330 OE9A085764 OE9A087855 OE9A088204 OE9A089778 OE9…
	1.1e-09	57	2097	2.8	GO:0006355 Reg. of transcription, DNA-templated	OE9A000299 OE9A002219 OE9A004162 OE9A004421 OE9A005384 OE9A005875 OE9A007230 OE9A015716 OE9A016967 OE9A019029 OE9A028341 OE9A031175 OE9A033879 OE9A042006 OE9A043316 OE9A043605 OE9A045301 OE9A046042 OE9A047454 OE9A049495 OE9A051495 OE9A053907 OE9A056063 OE9A056651 OE9A060030 OE9A061095 OE9A062775 OE9A066307 OE9A073161 OE9A075123 OE9A076184 OE9A079911 OE9A081134 OE9A081748 OE9A084330 OE9A085764 OE9…
	3.3e-08	26	588	4.5	GO:0005509 Calcium ion binding	OE9A002067 OE9A004883 OE9A006276 OE9A016940 OE9A020249 OE9A023580 OE9A024278 OE9A027095 OE9A032760 OE9A039140 OE9A039596 OE9A051863 OE9A058655 OE9A068607 OE9A072634 OE9A077755 OE9A080031 OE9A089257 OE9A090940 OE9A103265 OE9A105546 OE9A106281 OE9A109323 OE9A114342 OE9A115883 OE9A116396
	5.5e-06	53	2430	2.2	GO:0005667 Transcription factor complex	OE9A000299 OE9A000795 OE9A002219 OE9A004162 OE9A004421 OE9A005384 OE9A005875 OE9A007230 OE9A016967 OE9A019029 OE9A028341 OE9A031175 OE9A033879 OE9A042006 OE9A043316 OE9A043605 OE9A045301 OE9A046042 OE9A047454 OE9A051495 OE9A053907 OE9A056063 OE9A056651 OE9A060030 OE9A062775 OE9A066307 OE9A073161 OE9A075123 OE9A076184 OE9A079911 OE9A081134 OE9A081748 OE9A084330 OE9A085764 OE9A087855 OE9A088204 OE9…
	5.9e-06	16	307	5.3	GO:0004842 Ubiquitin-protein transferase activity	OE9A002619 OE9A020210 OE9A021231 OE9A027777 OE9A041636 OE9A045269 OE9A045980 OE9A071166 OE9A072034 OE9A075686 OE9A076093 OE9A087938 OE9A101335 OE9A115663 OE9A116163 OE9A121458
	3.4e-05	16	355	4.6	GO:0016567 Protein ubiquitination	OE9A002619 OE9A020210 OE9A021231 OE9A027777 OE9A041636 OE9A045269 OE9A045980 OE9A071166 OE9A072034 OE9A075686 OE9A076093 OE9A087938 OE9A101335 OE9A115663 OE9A116163 OE9A121458
	6.9e-05	15	334	4.6	GO:0004553 Hydrolase activity, hydrolyzing O-glycosyl compounds	OE9A008141 OE9A032361 OE9A041022 OE9A051211 OE9A054617 OE9A066090 OE9A083347 OE9A085531 OE9A087360 OE9A090863 OE9A093988 OE9A100291 OE9A106246 OE9A117660 OE9A117672
	7.1e-05	22	686	3.3	GO:0043565 Sequence-specific DNA binding	OE9A004162 OE9A004421 OE9A005384 OE9A031175 OE9A042006 OE9A043605 OE9A053907 OE9A056651 OE9A060030 OE9A062775 OE9A081134 OE9A085764 OE9A087855 OE9A088204 OE9A089778 OE9A091786 OE9A096960 OE9A097645 OE9A104316 OE9A108402 OE9A115035 OE9A118750
	0.0003	7	73	9.8	GO:0016762 Xyloglucan:xyloglucosyl transferase activity	OE9A008141 OE9A032361 OE9A041022 OE9A085531 OE9A090863 OE9A100291 OE9A117660
	0.00081	28	1188	2.4	GO:0004672 Protein kinase activity	OE9A001989 OE9A002800 OE9A006737 OE9A010507 OE9A023468 OE9A026115 OE9A028561 OE9A030746 OE9A037637 OE9A038395 OE9A039596 OE9A042127 OE9A042951 OE9A043543 OE9A055208 OE9A061517 OE9A066326 OE9A067165 OE9A078113 OE9A078886 OE9A079404 OE9A082944 OE9A084278 OE9A098085 OE9A103895 OE9A106281 OE9A112887 OE9A120256
	0.0009	7	89	8	GO:0042546 Cell wall biogenesis	OE9A008141 OE9A032361 OE9A041022 OE9A085531 OE9A090863 OE9A100291 OE9A117660
	0.00092	3	7	43.7	GO:0006839 Mitochondrial transport	OE9A074687 OE9A090698 OE9A095768
	0.0013	3	8	38.3	GO:0009814 Defense response, incompatible interaction	OE9A027777 OE9A041636 OE9A072034
	0.0036	9	195	4.7	GO:0048046 Apoplast	OE9A008141 OE9A028936 OE9A032361 OE9A041022 OE9A041775 OE9A085531 OE9A090863 OE9A100291 OE9A117660
	0.0054	38	2090	1.9	GO:0006468 Protein phosphorylation	OE9A001989 OE9A002800 OE9A004416 OE9A006737 OE9A010507 OE9A016506 OE9A023468 OE9A026115 OE9A028561 OE9A030746 OE9A037637 OE9A038395 OE9A039596 OE9A042127 OE9A042951 OE9A043543 OE9A055208 OE9A061517 OE9A063822 OE9A066326 OE9A067165 OE9A069924 OE9A072632 OE9A074891 OE9A078113 OE9A078886 OE9A079404 OE9A082944 OE9A083973 OE9A084278 OE9A098085 OE9A103895 OE9A106281 OE9A109323 OE9A112485 OE9A112887 OE9…
	0.0054	3	13	23.6	GO:0003830 Beta-1,4-mannosylglycoprotein 4-beta-N-acetylglucosaminyltransferase activity	OE9A042020 OE9A050550 OE9A081767
	0.0055	2	3	68	GO:0033611 Oxalate catabolic process	OE9A028936 OE9A041775
	0.0055	2	3	68	GO:0050203 Oxalate-CoA ligase activity	OE9A028936 OE9A041775
	0.0068	7	134	5.3	GO:0010411 Xyloglucan metabolic process	OE9A008141 OE9A032361 OE9A041022 OE9A085531 OE9A090863 OE9A100291 OE9A117660
	0.013	6	110	5.6	GO:0006887 Exocytosis	OE9A052076 OE9A075408 OE9A076753 OE9A100009 OE9A102590 OE9A120487

## Sheet: DOWN FC <-2
List of Differential Expressed Genes (DEGs) FC <-2 in T6_Sankari©Infect
Gene ID	baseMean	log2FoldChange	lfcSE	stat	pvalue	padj	id gene	Description
OE9A100268	44.8953	-23.6734	3.84483	-6.1572	7.40424e-10	6.51971e-08	OE9A100268	ID=OE9A100268T1;Parent=OE9A100268;Name=OE9A100268T1;product=OE9A100268P1;Description=ycf3-interacting 1, chloroplastic;Ontology_term=GO:0004371%2C GO:0006071%2C GO:0016021%2C GO:0046486
OE9A026412	13.5184	-6.25718	1.72844	-3.62013	0.000294458	0.00892214	OE9A026412	ID=OE9A026412T1;Parent=OE9A026412;Name=OE9A026412T1;product=OE9A026412P1;Description=AAA-ATPase At3g50940-like;Ontology_term=GO:0005524%2C GO:0016020
OE9A106271	9.86768	-5.81997	1.97797	-2.9424	0.00325679	0.065385	OE9A106271	ID=OE9A106271T1;Parent=OE9A106271;Name=OE9A106271T1;product=OE9A106271P1;Description=kirola-like;Ontology_term=GO:0006952%2C GO:0009607
OE9A045473	178.615	-3.97602	0.954021	-4.16764	3.07765e-05	0.00122545	OE9A045473	ID=OE9A045473T1;Parent=OE9A045473;Name=OE9A045473T1;product=OE9A045473P1;Description=F-box SKIP1-like;Ontology_term=GO:0005515
OE9A017651	9.48605	-3.73894	1.29122	-2.89567	0.00378349	0.0734341	OE9A017651	ID=OE9A017651T1;Parent=OE9A017651;Name=OE9A017651T1;product=OE9A017651P1;Description=stem-specific TSJT1;Ontology_term=GO:0004066%2C GO:0005829%2C GO:0006522%2C GO:0006529%2C GO:0006531%2C GO:0006541%2C GO:0042803
OE9A107141	13.1432	-3.52323	1.07328	-3.28268	0.00102826	0.0263748	OE9A107141	ID=OE9A107141T1;Parent=OE9A107141;Name=OE9A107141T1;product=OE9A107141P1;Description=11-beta-hydroxysteroid dehydrogenase-like 5;Ontology_term=GO:0016021%2C GO:0016491%2C GO:0055114
OE9A013742	13.0413	-3.15131	1.11047	-2.8378	0.00454251	0.0842371	OE9A013742	ID=OE9A013742T1;Parent=OE9A013742;Name=OE9A013742T1;product=OE9A013742P1;Description=ethylene-responsive transcription factor ESR2-like;Ontology_term=GO:0003677%2C GO:0003700%2C GO:0005667%2C GO:0006355%2C GO:0045449
OE9A043192	45.5373	-3.11081	0.55838	-5.57113	2.53092e-08	1.76157e-06	OE9A043192	ID=OE9A043192T1;Parent=OE9A043192;Name=OE9A043192T1;product=OE9A043192P1;Description=RADIALIS-like 3;Ontology_term=GO:0003677%2C GO:0005634
OE9A088051	18.7113	-3.0739	0.955906	-3.21569	0.00130132	0.0319127	OE9A088051	ID=OE9A088051T1;Parent=OE9A088051;Name=OE9A088051T1;product=OE9A088051P1;Description=dehydration-responsive element-binding 3-like;Ontology_term=GO:0003677%2C GO:0003700%2C GO:0005634%2C GO:0005667%2C GO:0006355%2C GO:0045449
OE9A046266	13.8888	-2.83664	0.795696	-3.56498	0.000363889	0.0108014	OE9A046266	ID=OE9A046266T1;Parent=OE9A046266;Name=OE9A046266T1;product=OE9A046266P1;Description=transcription factor MYC2-like;Ontology_term=GO:0046983
OE9A000717	11.1903	-2.69257	0.898564	-2.99653	0.00273074	0.0577859	OE9A000717	ID=OE9A000717T1;Parent=OE9A000717;Name=OE9A000717T1;product=OE9A000717P1;Description=transcription factor MYB56;Ontology_term=GO:0003677
OE9A029408	38.1847	-2.49885	0.634041	-3.94114	8.10953e-05	0.00285247	OE9A029408	ID=OE9A029408T1;Parent=OE9A029408;Name=OE9A029408T1;product=OE9A029408P1
OE9A049789	16.9008	-2.33645	0.744962	-3.13634	0.00171071	0.0399013	OE9A049789	ID=OE9A049789T1;Parent=OE9A049789;Name=OE9A049789T1;product=OE9A049789P1;Description=secoisolariciresinol dehydrogenase-like;Ontology_term=GO:0016491%2C GO:0055114
OE9A009707	36.485	-2.32476	0.748451	-3.1061	0.00189576	0.0432938	OE9A009707	ID=OE9A009707T1;Parent=OE9A009707;Name=OE9A009707T1;product=OE9A009707P1;Description=ABSCISIC ACID-INSENSITIVE 5;Ontology_term=GO:0003700%2C GO:0005667%2C GO:0006355%2C GO:0006950%2C GO:0009628%2C GO:0043565%2C GO:0045449
OE9A067383	20.3644	-2.29423	0.795417	-2.88431	0.00392272	0.0751879	OE9A067383	ID=OE9A067383T1;Parent=OE9A067383;Name=OE9A067383T1;product=OE9A067383P1;Description=homeobox-leucine zipper ATHB-51;Ontology_term=GO:0003700%2C GO:0005667%2C GO:0006355%2C GO:0043565%2C GO:0045449
OE9A092263	9.45735	-2.23218	0.772083	-2.89111	0.00383878	0.0739618	OE9A092263	ID=OE9A092263T1;Parent=OE9A092263;Name=OE9A092263T1;product=OE9A092263P1;Description=two-component response regulator ARR9-like;Ontology_term=GO:0000160%2C GO:0005622
OE9A101294	33.7133	-2.20816	0.660896	-3.34116	0.000834303	0.0220909	OE9A101294	ID=OE9A101294T1;Parent=OE9A101294;Name=OE9A101294T1;product=OE9A101294P1;Description=zinc-finger homeodomain 5-like;Ontology_term=GO:0003677
OE9A118657	447.91	-2.17763	0.763065	-2.8538	0.00431997	0.0810844	OE9A118657	ID=OE9A118657T1;Parent=OE9A118657;Name=OE9A118657T1;product=OE9A118657P1;Description=;Ontology_term=GO:0000272%2C GO:0005982%2C GO:0005985%2C GO:0016161
OE9A119262	47.9373	-2.14942	0.622168	-3.45473	0.00055085	0.0156094	OE9A119262	ID=OE9A119262T1;Parent=OE9A119262;Name=OE9A119262T1;product=OE9A119262P1;Description=growth-regulating factor 7-like;Ontology_term=GO:0005524%2C GO:0005634%2C GO:0006355
OE9A024065	20.7103	-2.1153	0.620665	-3.40812	0.00065412	0.0179541	OE9A024065	ID=OE9A024065T1;Parent=OE9A024065;Name=OE9A024065T1;product=OE9A024065P1;Description=alcohol dehydrogenase 1;Ontology_term=GO:0004022%2C GO:0008270%2C GO:0055114

## Sheet: ShinyGO DOWN FC <-2
	Enrichment FDR	nGenes	Pathway Genes	Fold Enrichment	Pathways (click for details)	Genes
	0.011	5	2097	6.6	GO:0006355 Reg. of transcription, DNA-templated	OE9A009707 OE9A013742 OE9A067383 OE9A088051 OE9A119262
	0.011	4	1164	9.6	GO:0003700 Transcription factor activity, sequence-specific DNA binding	OE9A009707 OE9A013742 OE9A067383 OE9A088051
	0.018	5	2562	5.4	GO:0003677 DNA binding	OE9A000717 OE9A013742 OE9A043192 OE9A088051 OE9A101294
	0.026	1	10	278.7	GO:0006071 Glycerol metabolic process	OE9A100268
	0.026	1	19	146.7	GO:0006529 Asparagine biosynthetic process	OE9A017651
	0.026	1	18	154.8	GO:0009628 Response to abiotic stimulus	OE9A009707
	0.026	1	18	154.8	GO:0004022 Alcohol dehydrogenase (NAD) activity	OE9A024065
	0.026	1	19	146.7	GO:0004066 Asparagine synthase (glutamine-hydrolyzing) activity	OE9A017651
	0.03	1	30	92.9	GO:0016161 Beta-amylase activity	OE9A118657
	0.03	4	2430	4.6	GO:0005667 Transcription factor complex	OE9A009707 OE9A013742 OE9A067383 OE9A088051
	0.03	1	27	103.2	GO:0000272 Polysaccharide catabolic process	OE9A118657
	0.042	1	46	60.6	GO:0006541 Glutamine metabolic process	OE9A017651
	0.042	2	571	9.8	GO:0016491 Oxidoreductase activity	OE9A049789 OE9A107141
