# Supplementary material for: Comparative transcriptomics of biopesticide-treated olives subjected to Xylella infection
Source: Research Square preprint supplement (doi:10.21203/rs.3.rs-8603179/v1), 2026-01-29
Supplement: Supplementary file 10 [file 92485516e6e8caa8ef4b46a0.xlsx]

## Sheet: Tabelle1
VBCF_ID	CNR_Code	Indiv_plant	Lane	M Seqs (raw)	Concatenated from 2 lanes	M Seqs (preprocessed)	M Aligned	% Aligned	Sample_Nr	Time
186523	AA03	Plant_03	HCV5KDSX3_2	45.2	no	38.8	32.5	91.7	3	T0
186527	AA07	Plant_01	HCV5KDSX3_2	45.1	no	38.1	32	91.9	7	T2
186528	AA08	Plant_02	HCV5KDSX3_2	55.9	no	47.8	40.4	92.3	8	T2
186529	AA09	Plant_03	HCV5KDSX3_2	44	no	37.2	31.4	92.3	9	T2
186530	AA10	Plant_04	HCV5KDSX3_2	60.3	no	51.2	43.5	92.6	10	T2
186531	AA11	Plant_05	HCV5KDSX3_2	37.7	no	32.6	27.1	91.9	11	T2
186532	AA12	Plant_06	HCV5KDSX3_2	43.7	no	37.4	31.2	92.1	12	T2
186533	AA19	Plant_01	HCV5KDSX3_2	44.8	no	37.9	31.9	91.9	19	T5
186534	AA20	Plant_02	HCV5KDSX3_2	34.1	no	29.6	24.6	91.3	20	T5
186535	AA21	Plant_03	HCV5KDSX3_2	47.3	no	40.7	34.1	92.1	21	T5
186536	AA22	Plant_04	HCV5KDSX3_2	37.4	no	32	26.6	92.1	22	T5
186537	AA23	Plant_05	HCV5KDSX3_2	40.1	no	33.9	28.3	92	23	T5
186710	AA13	Plant_01	HCV57DSX3_2	153.8	no	39.5962	32.9	92.5	13	T4
186711	AA14	Plant_02	HCV57DSX3_2	159.3	no	40.4818	33.6	91.5	14	T4
186712	AA15	Plant_03	HCV57DSX3_2	186.9	no	45.5403	37.6	91.7	15	T4
186713	AA16	Plant_04	HCV57DSX3_2	157.9	no	39.4075	32.4	91.6	16	T4
187620	AA17	Plant_05	HCV57DSX3_2	152.6	no	37.9103	30.9	91.2	17	T4
186715	AA18	Plant_06	HCV57DSX3_2	161.7	no	40.679	33.4	91.6	18	T4
186538	AA24	Plant_06	HCV5KDSX3_2	51.1	no	44.1	36.7	91.6	24	T5
186539	AA25	Plant_01	HCV5KDSX3_2	38.4	no	33.1	27.6	92.5	25	T6
186540	AA26	Plant_02	HCV5KDSX3_2	44	no	37.7	31.1	91.6	26	T6
186541	AA27	Plant_03	HCV5KDSX3_2	33.6	no	28.9	24	91.9	27	T6
186542	AA28	Plant_04	HCV5KDSX3_2	40.3	no	34.5	28.7	91.7	28	T6
186543	AA29	Plant_05	HCV5KDSX3_2	46.4	no	39.8	32.9	91.2	29	T6
186544	AA30	Plant_06	HCV5KDSX3_2	41	no	34.5	28.4	91.9	30	T6
186548	OO04	Plant_10	HCV5KDSX3_2	45.3	no	38.8	32.2	91.7	34	T0
186551	OO07	Plant_07	HCV5KDSX3_2	47.2	no	40.2	33.7	92	37	T2
186552	OO08	Plant_08	HCV5KDSX3_2	40.6	no	35.1	29.3	92.7	38	T2
186553	OO09	Plant_09	HCV5KDSX3_2	40.3	no	34.7	26.8	92.5	39	T2
186554	OO10	Plant_10	HCV5KDSX3_2	27	no	23.3	19.5	92.2	40	T2
186555	OO11	Plant_11	HCV5KDSX3_2	37	no	32	26.8	92.5	41	T2
186556	OO12	Plant_12	HCV5KDSX3_2	41.7	no	35.1	29.4	92.2	42	T2
186557	OO13	Plant_07	HCV5KDSX3_2	37.7	no	32.4	27.3	93.1	43	T5
186558	OO14	Plant_08	HCV5KDSX3_2	43.7	no	37.3	31.3	92.8	44	T5
186559	OO15	Plant_09	HCV5KDSX3_2	44.4	no	38.3	32.5	93.4	45	T5
186560	OO16	Plant_10	HCV5KDSX3_2	42.3	no	36.1	30.4	93.2	46	T5
186561	OO17	Plant_11	HCV5KDSX3_2	43.9	no	37.6	31.7	93	47	T5
186562	OO18	Plant_12	HCV5KDSX3_2	63.6	no	54.6	46.2	93	48	T5
186563	OO19	Plant_07	HCV5KDSX3_2	42.6	no	36.4	30.8	92.7	49	T6
186565	OO21	Plant_09	HCV5KDSX3_2	42.5	no	35.8	30.1	92.4	51	T6
186566	OO22	Plant_10	HCV5KDSX3_2	55.2	no	47.1	41.5	94.8	52	T6
186567	OO23	Plant_11	HCV5KDSX3_2	45.2	no	38.1	31.6	91.8	53	T6
186581	GIP13	Plant_13	HCV5KDSX3_2	45.6	no	38.9	32.7	92.6	67	T3
186582	GIP14	Plant_14	HCV5KDSX3_2	45.1	no	38.6	32.1	92.5	68	T3
186583	GIP15	Plant_15	HCV5KDSX3_2	43.6	no	36.7	31.1	92.8	69	T3
187552	GIP16	Plant_16	HCV5KDSX3_2	45.2	no	39.1	32.9	92.7	70	T3
186585	GIP17	Plant_17	HCV5KDSX3_2	37.7	no	32.5	27.2	92.4	71	T3
186586	GIP18	Plant_18	HCV5KDSX3_2	39.4	no	33.3	27.9	92.7	72	T3
186587	GIP19	Plant_13	HCV5KDSX3_2	42.5	no	36.2	30.2	92.2	73	T4
186588	GIP20	Plant_14	HCV5KDSX3_2	42.1	no	36.2	30.4	92.5	74	T4
186589	GIP21	Plant_15	HCV5KDSX3_2	44.1	no	37.8	31.8	92.5	75	T4
187553	GIP22	Plant_16	HCV5KDSX3_2	39.3	no	33.3	27.8	92.5	76	T4
186591	GIP23	Plant_17	HCV5KDSX3_2	32.3	no	27.5	22.8	92	77	T4
187554	GIP24	Plant_18	HCV5KDSX3_2	41.5	no	35.9	29.8	91.5	78	T4
186568	OO24	Plant_12	HCV5KDSX3_2	45	no	38.2	31.7	92.4	54	T6
186569	GIP01	Plant_13	HCV5KDSX3_2	38.8	no	32.9	27.2	91.9	55	T0
186570	GIP02	Plant_14	HCV5KDSX3_2	37.5	no	32.3	26.9	91.7	56	T0
186571	GIP03	Plant_15	HCV5KDSX3_2	37.4	no	32	26.8	91.7	57	T0
186572	GIP04	Plant_16	HCV5KDSX3_2	55.4	no	46.8	38.8	91.4	58	T0
186575	GIP07	Plant_13	HCV5KDSX3_2	52.9	no	45.3	37.9	92.4	61	T1
186576	GIP08	Plant_14	HCV5KDSX3_2	55.5	no	47.4	39.9	92.9	62	T1
186577	GIP09	Plant_15	HCV5KDSX3_2	41.1	no	34.9	29.3	92.8	63	T1
186580	GIP12	Plant_18	HCV5KDSX3_2	47.3	no	40.3	33.7	92.3	66	T1
186593	GIP25	Plant_13	HCV5JDSX3_HCV57DSX3	45.1	yes	36.4141	30.9	93.1	79	T5
186594	GIP26	Plant_14	HCV5JDSX3_HCV57DSX3	38.9	yes	30.7822	26	92.3	80	T5
186595	GIP27	Plant_15	HCV5JDSX3_HCV57DSX3	34.5	yes	27.2716	22.8	92.8	81	T5
186596	GIP28	Plant_16	HCV5JDSX3_HCV57DSX3	43.2	yes	34.5759	29.2	92.5	82	T5
186597	GIP29	Plant_17	HCV5JDSX3_HCV57DSX3	39	yes	30.9965	26	92.6	83	T5
186598	GIP30	Plant_18	HCV5JDSX3_HCV57DSX3	43.8	yes	34.3833	28.7	92.5	84	T5
186599	GIP31	Plant_13	HCV5JDSX3_HCV57DSX3	35.1	yes	27.8233	23.3	92.4	85	T6
186602	GIP34	Plant_16	HCV5JDSX3_HCV57DSX3	34	yes	26.7272	22.2	92.7	88	T6
186605	PP01	Plant_19	HCV5JDSX3_HCV57DSX3	40.9	yes	32.5971	26.8	91.8	91	T0
186606	PP02	Plant_20	HCV5JDSX3_HCV57DSX3	35.6	yes	28.7626	23.9	91.8	92	T0
186608	PP04	Plant_22	HCV5JDSX3_HCV57DSX3	33.2	yes	27.0135	22.5	92	94	T0
186609	PP05	Plant_23	HCV5JDSX3_HCV57DSX3	36.8	yes	28.7225	26.2	96.4	95	T0
186610	PP06	Plant_24	HCV5JDSX3_HCV57DSX3	47.6	yes	38.3908	32.2	92.6	96	T0
186611	PP07	Plant_19	HCV5JDSX3_HCV57DSX3	37.8	yes	30.0482	24.6	91.4	97	T2
186612	PP08	Plant_20	HCV5JDSX3_HCV57DSX3	34	yes	27.026	22.4	91.8	98	T2
186613	PP09	Plant_21	HCV5JDSX3_HCV57DSX3	36.6	yes	29.6321	24.7	92.3	99	T2
186614	PP10	Plant_22	HCV5JDSX3_HCV57DSX3	33.3	yes	26.0533	21.5	92.1	100	T2
186615	PP11	Plant_23	HCV5JDSX3_HCV57DSX3	44.9	yes	35.5061	30.3	93.5	101	T2
186616	PP12	Plant_24	HCV5JDSX3_HCV57DSX3	30.9	yes	24.3483	20.3	91.7	102	T2
186617	PP13	Plant_19	HCV5JDSX3_HCV57DSX3	37.2	yes	30.5579	25.3	91.5	103	T5
186618	PP14	Plant_20	HCV5JDSX3_HCV57DSX3	47.9	yes	38.7654	31.9	92.2	104	T5
186619	PP15	Plant_21	HCV5JDSX3_HCV57DSX3	28.3	yes	22.5207	18.4	92	105	T5
186621	PP17	Plant_23	HCV5JDSX3_HCV57DSX3	41.4	yes	33.8031	28	92.5	107	T5
186622	PP18	Plant_24	HCV5JDSX3_HCV57DSX3	36	yes	29.2022	24	91.7	108	T5
186623	PP19	Plant_19	HCV5JDSX3_HCV57DSX3	42.1	yes	33.9715	28.2	91.7	109	T6
186624	PP20	Plant_20	HCV5JDSX3_HCV57DSX3	49.2	yes	39.5113	32.3	91.1	110	T6
186625	PP21	Plant_21	HCV5JDSX3_HCV57DSX3	39	yes	31.9551	26.3	92	111	T6
186628	PP24	Plant_24	HCV5JDSX3_HCV57DSX3	44	yes	34.9328	28.4	91.3	114	T6
187535	AA01	Plant_01	HCV5KDSX3_2	40.5	no	35.2	0.0062	NA	1	T0
187536	AA02	Plant_02	HCV5KDSX3_2	43.8	no	38	31.5	91.6	2	T0
187537	AA04	Plant_04	HCV5KDSX3_2	33.4	no	28.4	23	91.4	4	T0
187538	AA05	Plant_05	HCV5KDSX3_2	34.7	no	30.4	25.3	92	5	T0
187539	AA06	Plant_06	HCV5KDSX3_2	43.6	no	37.6	30.8	91.3	6	T0
187541	OO01	Plant_07	HCV5KDSX3_2	33.8	no	27.9	23	91.5	31	T0
187542	OO02	Plant_08	HCV5KDSX3_2	35.7	no	31	25.2	90.9	32	T0
187543	OO03	Plant_09	HCV5KDSX3_2	37.8	no	32.7	26.7	91.2	33	T0
187544	OO05	Plant_11	HCV5KDSX3_2	49	no	42.5	34.9	91.5	35	T0
187545	OO06	Plant_12	HCV5KDSX3_2	45.1	no	37.1	32.8	94.8	36	T0
187546	OO20	Plant_08	HCV5KDSX3_2	35	no	29.9	25.3	92.7	50	T6
187547	GIP05	Plant_17	HCV5KDSX3_2	52.4	no	45.3	37.8	92	59	T0
187548	GIP06	Plant_18	HCV5KDSX3_2	43.9	no	37.9	31.2	91.4	60	T0
187550	GIP10	Plant_16	HCV5KDSX3_2	43.4	no	36.5	29.8	92	64	T1
187551	GIP11	Plant_17	HCV5KDSX3_2	44.8	no	39.3	32.5	91.9	65	T1
187555	GIP32	Plant_14	HCV5JDSX3_HCV57DSX3	71.6	yes	57.066	47.3	92.8	86	T6
187556	GIP33	Plant_15	HCV5JDSX3_HCV57DSX3	62.6	yes	48.5902	40.7	92.9	87	T6
187557	GIP35	Plant_17	HCV5JDSX3_HCV57DSX3	71.5	yes	55.9778	46.4	91.9	89	T6
187558	GIP36	Plant_18	HCV5JDSX3_HCV57DSX3	54	yes	43.1436	35.1	92	90	T6
187560	PP03	Plant_21	HCV5JDSX3_HCV57DSX3	60	yes	46.2114	42	95.5	93	T0
187568	PP16	Plant_22	HCV5JDSX3_HCV57DSX3	47.7	yes	38.6156	31.7	91.6	106	T5
187572	PP22	Plant_22	HCV5JDSX3_HCV57DSX3	41.2	yes	32.8239	26.7	91.3	112	T6
187573	PP23	Plant_23	HCV5JDSX3_HCV57DSX3	49.1	yes	38.4317	31.5	91.6	113	T6
