# Supplementary material for: Comparative transcriptomics of biopesticide-treated olives subjected to Xylella infection
Source: Research Square preprint supplement (doi:10.21203/rs.3.rs-8603179/v1), 2026-01-29
Supplement: Supplementary file 11 [file a748d92487a77f5fd4ac94a5.xlsx]

## Sheet: UP FC >2
List of Differential Expressed Genes (DEGs) FC <-2 in T6_MockPsJN_
Gene ID	baseMean	log2FoldChange	lfcSE	stat	pvalue	padj	id gene	Description
OE9A067377	103.496	6.14126	1.97557	3.10859	0.00187979	0.0577079	OE9A067377	ID=OE9A067377T1;Parent=OE9A067377;Name=OE9A067377T1;product=OE9A067377P1
OE9A023273	12.0435	5.42967	1.58464	3.42645	0.000611537	0.0284819	OE9A023273	ID=OE9A023273T1;Parent=OE9A023273;Name=OE9A023273T1;product=OE9A023273P1;Description=lon protease homolog 2, peroxisomal-like isoform X1;Ontology_term=GO:0004176%2C GO:0004252%2C GO:0005524%2C GO:0005782%2C GO:0006510%2C GO:0006515%2C GO:0016485%2C GO:0016558
OE9A033588	15.3663	4.1968	1.43477	2.92507	0.00344383	0.083183	OE9A033588	ID=OE9A033588T1;Parent=OE9A033588;Name=OE9A033588T1;product=OE9A033588P1;Description=Multicopper oxidase;Ontology_term=GO:0005507%2C GO:0046274%2C GO:0048046%2C GO:0052716%2C GO:0055114
OE9A059588	12.9618	4.00955	1.04648	3.83146	0.000127384	0.0102	OE9A059588	ID=OE9A059588T1;Parent=OE9A059588;Name=OE9A059588T1;product=OE9A059588P1;Description=alcohol dehydrogenase class-3-like;Ontology_term=GO:0004022%2C GO:0008270%2C GO:0055114
OE9A051723	113.642	3.78789	1.24243	3.04877	0.00229783	0.0649507	OE9A051723	ID=OE9A051723T1;Parent=OE9A051723;Name=OE9A051723T1;product=OE9A051723P1;Description=mutant iridoid synthase;Ontology_term=GO:0005829%2C GO:0016099%2C GO:0016628%2C GO:0042803%2C GO:0055114
OE9A076251	12.7084	3.70956	0.870309	4.26235	2.02289e-05	0.00288466	OE9A076251	ID=OE9A076251T1;Parent=OE9A076251;Name=OE9A076251T1;product=OE9A076251P1;Description=shikimate O-hydroxycinnamoyltransferase-like;Ontology_term=GO:0016747
OE9A087510	14.9478	3.58121	1.25011	2.86471	0.00417394	0.0931113	OE9A087510	ID=OE9A087510T1;Parent=OE9A087510;Name=OE9A087510T1;product=OE9A087510P1;Description=RADIALIS-like 1;Ontology_term=GO:0003677%2C GO:0005634
OE9A030069	12.8949	3.55048	1.03493	3.43065	0.000602132	0.0283751	OE9A030069	ID=OE9A030069T1;Parent=OE9A030069;Name=OE9A030069T1;product=OE9A030069P1
OE9A044770	12.1423	3.53445	0.981873	3.5997	0.000318579	0.0187187	OE9A044770	ID=OE9A044770T1;Parent=OE9A044770;Name=OE9A044770T1;product=OE9A044770P1;Description=copal-8-ol diphosphate hydratase, chloroplastic-like;Ontology_term=GO:0000287%2C GO:0010333%2C GO:0016102%2C GO:0050559
OE9A101533	108.855	3.50945	1.14259	3.07149	0.00212996	0.0622149	OE9A101533	ID=OE9A101533T1;Parent=OE9A101533;Name=OE9A101533T1;product=OE9A101533P1;Description=mutant iridoid synthase;Ontology_term=GO:0005829%2C GO:0016099%2C GO:0016628%2C GO:0042803%2C GO:0055114
OE9A027298	12.0024	3.43947	0.962173	3.57469	0.000350645	0.019867	OE9A027298	ID=OE9A027298T1;Parent=OE9A027298;Name=OE9A027298T1;product=OE9A027298P1;Description=Leucine-rich repeat;Ontology_term=GO:0005515
OE9A119787	16.8307	3.3239	0.972105	3.41929	0.000627859	0.0288713	OE9A119787	ID=OE9A119787T1;Parent=OE9A119787;Name=OE9A119787T1;product=OE9A119787P1
OE9A096392	18.68	3.28536	1.13264	2.90064	0.00372405	0.0875254	OE9A096392	ID=OE9A096392T1;Parent=OE9A096392;Name=OE9A096392T1;product=OE9A096392P1;md5=c0173038f1d98f563015a283ba9fefee;INTERPRO=<table><tr><th>DB</th><th>ID</th><th>Description</th></tr><tr><td>Gene3D</td><td>G3DSA:1.10.600.10</td><td></td></tr><tr><td>PANTHER</td><td>PTHR31225</td><td></td></tr><tr><td>PANTHER</td><td>PTHR31225:SF15</td><td></td></tr><tr><td>SUPERFAMILY</td><td>SSF48576</td><td></td></tr…
OE9A079697	9.39139	3.11541	1.03104	3.02162	0.00251425	0.067965	OE9A079697	ID=OE9A079697T1;Parent=OE9A079697;Name=OE9A079697T1;product=OE9A079697P1;Description=DOWNY MILDEW RESISTANCE 6-like;Ontology_term=GO:0046872%2C GO:0051213%2C GO:0055114
OE9A025701	12.3996	3.07951	1.02576	3.00218	0.00268052	0.070801	OE9A025701	ID=OE9A025701T1;Parent=OE9A025701;Name=OE9A025701T1;product=OE9A025701P1;Description=probably inactive leucine-rich repeat receptor kinase IMK2;Ontology_term=GO:0005515%2C GO:0016301%2C GO:0016310%2C GO:0032440%2C GO:0055114
OE9A062271	10.1566	2.89551	1.01976	2.8394	0.00451987	0.0962718	OE9A062271	ID=OE9A062271T1;Parent=OE9A062271;Name=OE9A062271T1;product=OE9A062271P1;Description=Methyltransf_11 domain-containing;Ontology_term=GO:0005737%2C GO:0008757%2C GO:0032259
OE9A053162	10.0759	2.85779	0.900932	3.17204	0.00151372	0.0502564	OE9A053162	ID=OE9A053162T1;Parent=OE9A053162;Name=OE9A053162T1;product=OE9A053162P1
OE9A033898	30.9971	2.82257	0.755436	3.73635	0.000186714	0.0133752	OE9A033898	ID=OE9A033898T1;Parent=OE9A033898;Name=OE9A033898T1;product=OE9A033898P1;Description=AT-hook motif nuclear-localized 25-like;Ontology_term=GO:0005488
OE9A026654	11.8623	2.81738	0.971011	2.90149	0.00371389	0.0873676	OE9A026654	ID=OE9A026654T1;Parent=OE9A026654;Name=OE9A026654T1;product=OE9A026654P1;Description=auxin-responsive SAUR50-like;Ontology_term=GO:0009733
OE9A110943	35.7038	2.76708	0.794191	3.48415	0.000493707	0.0250029	OE9A110943	ID=OE9A110943T1;Parent=OE9A110943;Name=OE9A110943T1;product=OE9A110943P1;md5=a56ca71f62a968d2cd24d750cec7593b;INTERPRO=<table><tr><th>DB</th><th>ID</th><th>Description</th></tr><tr><td>Coils</td><td>Coil</td><td></td></tr><tr><td>Gene3D</td><td>G3DSA:1.10.600.10</td><td></td></tr><tr><td>Gene3D</td><td>G3DSA:1.50.30.10</td><td></td></tr><tr><td>PANTHER</td><td>PTHR31225</td><td></td></tr><tr><td>…
OE9A066198	11.767	2.72155	0.782631	3.47743	0.000506239	0.0253449	OE9A066198	ID=OE9A066198T1;Parent=OE9A066198;Name=OE9A066198T1;product=OE9A066198P1;Description=sugar carrier C-like;Ontology_term=GO:0005351%2C GO:0005355%2C GO:0005887%2C GO:0015992%2C GO:0046323%2C GO:1904659
OE9A011055	16.2663	2.71987	0.881872	3.0842	0.00204103	0.060807	OE9A011055	ID=OE9A011055T1;Parent=OE9A011055;Name=OE9A011055T1;product=OE9A011055P1
OE9A027483	30.4013	2.71557	0.762921	3.55944	0.000371643	0.0206681	OE9A027483	ID=OE9A027483T1;Parent=OE9A027483;Name=OE9A027483T1;product=OE9A027483P1;Description=rust resistance kinase Lr10-like;Ontology_term=GO:0004672%2C GO:0005524%2C GO:0006468
OE9A009711	18.4825	2.66983	0.88886	3.00366	0.00266754	0.0705347	OE9A009711	ID=OE9A009711T1;Parent=OE9A009711;Name=OE9A009711T1;product=OE9A009711P1
OE9A084072	16.999	2.64474	0.641702	4.12144	3.76507e-05	0.00447662	OE9A084072	ID=OE9A084072T1;Parent=OE9A084072;Name=OE9A084072T1;product=OE9A084072P1;Description=(+)-neomenthol dehydrogenase-like;Ontology_term=GO:0016491%2C GO:0055114
OE9A048988	38.7014	2.64414	0.703371	3.75924	0.000170431	0.0125757	OE9A048988	ID=OE9A048988T1;Parent=OE9A048988;Name=OE9A048988T1;product=OE9A048988P1
OE9A001313	15.851	2.63611	0.724705	3.63749	0.000275309	0.0171854	OE9A001313	ID=OE9A001313T1;Parent=OE9A001313;Name=OE9A001313T1;product=OE9A001313P1;Description=transcription factor bHLH18-like;Ontology_term=GO:0046983
OE9A048916	45.9529	2.6201	0.439223	5.96531	2.44169e-09	3.4432e-06	OE9A048916	ID=OE9A048916T1;Parent=OE9A048916;Name=OE9A048916T1;product=OE9A048916P1
OE9A121409	12.2067	2.61244	0.746456	3.49979	0.000465628	0.0240017	OE9A121409	ID=OE9A121409T2;Parent=OE9A121409;Name=OE9A121409T2;product=OE9A121409P2;Description=serine carboxypeptidase-like 18 isoform X1;Ontology_term=GO:0004185%2C GO:0016747%2C GO:0019748%2C GO:0051603
OE9A055700	12.0831	2.55731	0.762912	3.35204	0.000802189	0.0346292	OE9A055700	ID=OE9A055700T1;Parent=OE9A055700;Name=OE9A055700T1;product=OE9A055700P1;Description=DNA topoisomerase 3-alpha isoform X1;Ontology_term=GO:0003677%2C GO:0003917%2C GO:0005694%2C GO:0006265%2C GO:0008270
OE9A035993	23.6896	2.55493	0.85472	2.98921	0.00279704	0.0725844	OE9A035993	ID=OE9A035993T1;Parent=OE9A035993;Name=OE9A035993T1;product=OE9A035993P1;Description=pectinesterase-like;Ontology_term=GO:0005618%2C GO:0005982%2C GO:0005985%2C GO:0030599%2C GO:0042545%2C GO:0043086%2C GO:0045330%2C GO:0045490%2C GO:0046910
OE9A072004	36.1211	2.54255	0.72749	3.49496	0.000474128	0.0243127	OE9A072004	ID=OE9A072004T2;Parent=OE9A072004;Name=OE9A072004T2;product=OE9A072004P2;Description=transcription factor bHLH63-like;Ontology_term=GO:0046983
OE9A044252	29.616	2.53603	0.654899	3.87239	0.000107772	0.00905824	OE9A044252	ID=OE9A044252T1;Parent=OE9A044252;Name=OE9A044252T1;product=OE9A044252P1
OE9A070842	35.9077	2.52683	0.476504	5.30285	1.14009e-07	9.0434e-05	OE9A070842	ID=OE9A070842T1;Parent=OE9A070842;Name=OE9A070842T1;product=OE9A070842P1;Description=zinc finger WIP2-like;Ontology_term=GO:0003676%2C GO:0046872
OE9A073677	9.28488	2.50967	0.847693	2.96059	0.00307048	0.076779	OE9A073677	ID=OE9A073677T1;Parent=OE9A073677;Name=OE9A073677T1;product=OE9A073677P1;Description=dihydroceramide fatty acyl 2-hydroxylase FAH1-like;Ontology_term=GO:0005506%2C GO:0006633%2C GO:0016021%2C GO:0016491%2C GO:0055114
OE9A085630	32.2577	2.50435	0.481791	5.19801	2.01437e-07	0.000138191	OE9A085630	ID=OE9A085630T1;Parent=OE9A085630;Name=OE9A085630T1;product=OE9A085630P1;Description=calmodulin 11;Ontology_term=GO:0005509%2C GO:0032440%2C GO:0055114
OE9A032538	38.4313	2.46507	0.679263	3.62903	0.000284486	0.0175696	OE9A032538	ID=OE9A032538T1;Parent=OE9A032538;Name=OE9A032538T1;product=OE9A032538P1;Description=glucan endo-1,3-beta-glucosidase, acidic-like;Ontology_term=GO:0004553%2C GO:0005975
OE9A110789	15.2459	2.45726	0.6754	3.63823	0.000274522	0.0171854	OE9A110789	ID=OE9A110789T2;Parent=OE9A110789;Name=OE9A110789T2;product=OE9A110789P2;Description=PI-PLC X domain-containing At5g67130;Ontology_term=GO:0006629%2C GO:0008081
OE9A116990	14.0291	2.45152	0.770656	3.18109	0.00146722	0.0493669	OE9A116990	ID=OE9A116990T1;Parent=OE9A116990;Name=OE9A116990T1;product=OE9A116990P1;Description=pentatricopeptide repeat-containing At3g29230-like;Ontology_term=GO:0005515
OE9A081193	11.7524	2.45139	0.775498	3.16105	0.001572	0.0516198	OE9A081193	ID=OE9A081193T1;Parent=OE9A081193;Name=OE9A081193T1;product=OE9A081193P1;Description=sentrin-specific protease 6-like;Ontology_term=GO:0006508%2C GO:0008234
OE9A015570	13.3621	2.43937	0.796901	3.06107	0.00220546	0.0629399	OE9A015570	ID=OE9A015570T1;Parent=OE9A015570;Name=OE9A015570T1;product=OE9A015570P1
OE9A110486	19.6346	2.42966	0.74208	3.27412	0.0010599	0.0412631	OE9A110486	ID=OE9A110486T1;Parent=OE9A110486;Name=OE9A110486T1;product=OE9A110486P1;Description=crocetin glucosyltransferase, chloroplastic-like;Ontology_term=GO:0008152%2C GO:0016758
OE9A109182	73.4811	2.40824	0.399204	6.03261	1.61336e-09	2.40893e-06	OE9A109182	ID=OE9A109182T1;Parent=OE9A109182;Name=OE9A109182T1;product=OE9A109182P1;Description=rust resistance kinase Lr10-like;Ontology_term=GO:0030247
OE9A031799	112.52	2.39425	0.41434	5.77847	7.53847e-09	8.69769e-06	OE9A031799	ID=OE9A031799T1;Parent=OE9A031799;Name=OE9A031799T1;product=OE9A031799P1;Description=type I inositol polyphosphate 5-phosphatase 2-like isoform X1;Ontology_term=GO:0016787%2C GO:0046856
OE9A108404	760.839	2.38973	0.661343	3.61345	0.000302148	0.0181846	OE9A108404	ID=OE9A108404T1;Parent=OE9A108404;Name=OE9A108404T1;product=OE9A108404P1
OE9A069697	12.3664	2.38883	0.806675	2.96132	0.0030632	0.0766796	OE9A069697	ID=OE9A069697T1;Parent=OE9A069697;Name=OE9A069697T1;product=OE9A069697P1
OE9A116396	17.7614	2.3591	0.831334	2.83773	0.00454356	0.0966716	OE9A116396	ID=OE9A116396T1;Parent=OE9A116396;Name=OE9A116396T1;product=OE9A116396P1;Description=probable calcium-binding CML44;Ontology_term=GO:0005509
OE9A060891	11.1487	2.34893	0.749053	3.13586	0.00171351	0.0542143	OE9A060891	ID=OE9A060891T1;Parent=OE9A060891;Name=OE9A060891T1;product=OE9A060891P1;Description=guard cell S-type anion channel SLAC1;Ontology_term=GO:0005886%2C GO:0006873%2C GO:0008308%2C GO:0009270%2C GO:0009737%2C GO:0010037%2C GO:0010193%2C GO:0015698%2C GO:0015711%2C GO:0016021%2C GO:0019901%2C GO:0019903%2C GO:0050891%2C GO:0090332%2C GO:1902456%2C GO:1903959
OE9A026017	17.9126	2.34544	0.826826	2.83668	0.00455855	0.0968283	OE9A026017	ID=OE9A026017T1;Parent=OE9A026017;Name=OE9A026017T1;product=OE9A026017P1;Description=probable WRKY transcription factor 75;Ontology_term=GO:0003700%2C GO:0005667%2C GO:0006355%2C GO:0043565%2C GO:0044212%2C GO:0045449%2C GO:0048364
OE9A098864	205.68	2.308	0.466117	4.95154	7.36269e-07	0.000352617	OE9A098864	ID=OE9A098864T1;Parent=OE9A098864;Name=OE9A098864T1;product=OE9A098864P1;Description=probable LRR receptor-like serine threonine- kinase At3g47570 isoform X2;Ontology_term=GO:0004672%2C GO:0005515%2C GO:0005524%2C GO:0006468
OE9A019936	53.8945	2.30454	0.616977	3.73522	0.000187551	0.0133752	OE9A019936	ID=OE9A019936T1;Parent=OE9A019936;Name=OE9A019936T1;product=OE9A019936P1
OE9A046139	43.5396	2.28648	0.478178	4.78165	1.73859e-06	0.000711785	OE9A046139	ID=OE9A046139T1;Parent=OE9A046139;Name=OE9A046139T1;product=OE9A046139P1;Description=transcription factor bHLH149-like;Ontology_term=GO:0046983
OE9A066348	16.624	2.27129	0.672849	3.37563	0.000736457	0.0326239	OE9A066348	ID=OE9A066348T1;Parent=OE9A066348;Name=OE9A066348T1;product=OE9A066348P1;Description=signal peptide peptidase-like 3;Ontology_term=GO:0005765%2C GO:0006465%2C GO:0030660%2C GO:0033619%2C GO:0042500%2C GO:0071458%2C GO:0071556
OE9A056679	19.7245	2.24997	0.594658	3.78363	0.000154558	0.0116414	OE9A056679	ID=OE9A056679T1;Parent=OE9A056679;Name=OE9A056679T1;product=OE9A056679P1;Description=LEAF RUST 10 DISEASE-RESISTANCE LOCUS RECEPTOR-LIKE PROTEIN KINASE-like;Ontology_term=GO:0030247
OE9A033137	1326.6	2.24665	0.713101	3.15053	0.00162975	0.0529002	OE9A033137	ID=OE9A033137T1;Parent=OE9A033137;Name=OE9A033137T1;product=OE9A033137P1;Description=dehydration-responsive element-binding 2A-like;Ontology_term=GO:0003677%2C GO:0003700%2C GO:0005667%2C GO:0006355%2C GO:0045449
OE9A083241	27.5912	2.23982	0.505963	4.42685	9.56177e-06	0.00192624	OE9A083241	ID=OE9A083241T1;Parent=OE9A083241;Name=OE9A083241T1;product=OE9A083241P1;Description=LUTEIN DEFICIENT 5, chloroplastic;Ontology_term=GO:0005506%2C GO:0020037%2C GO:0055114%2C GO:0070330
OE9A053718	163.285	2.23775	0.574751	3.89343	9.8835e-05	0.00856222	OE9A053718	ID=OE9A053718T1;Parent=OE9A053718;Name=OE9A053718T1;product=OE9A053718P1;Description=nitrate reductase;Ontology_term=GO:0006809%2C GO:0009325%2C GO:0009703%2C GO:0020037%2C GO:0030151%2C GO:0042128%2C GO:0043546%2C GO:0050464%2C GO:0055114
OE9A066806	16.1565	2.21179	0.588884	3.7559	0.000172721	0.0127077	OE9A066806	ID=OE9A066806T1;Parent=OE9A066806;Name=OE9A066806T1;product=OE9A066806P1;Description=hexose carrier HEX6-like;Ontology_term=GO:0016021%2C GO:0022891%2C GO:0055085
OE9A075288	119.42	2.21159	0.526634	4.19947	2.67539e-05	0.00361265	OE9A075288	ID=OE9A075288T1;Parent=OE9A075288;Name=OE9A075288T1;product=OE9A075288P1;Description=high-affinity nitrate transporter -like;Ontology_term=GO:0010167%2C GO:0015706%2C GO:0016021
OE9A103542	17.4239	2.1984	0.743437	2.95707	0.00310577	0.077275	OE9A103542	ID=OE9A103542T1;Parent=OE9A103542;Name=OE9A103542T1;product=OE9A103542P1;Description=G-type lectin S-receptor-like serine threonine- kinase RLK1;Ontology_term=GO:0004674%2C GO:0005524%2C GO:0006468%2C GO:0009069%2C GO:0016020
OE9A095644	14.208	2.19831	0.725551	3.02985	0.00244672	0.0673247	OE9A095644	ID=OE9A095644T1;Parent=OE9A095644;Name=OE9A095644T1;product=OE9A095644P1;Description=ethylene-responsive transcription factor ERF118-like;Ontology_term=GO:0003677%2C GO:0003700%2C GO:0005667%2C GO:0006355%2C GO:0045449
OE9A086702	13.3073	2.19202	0.767935	2.85443	0.00431145	0.0943428	OE9A086702	ID=OE9A086702T1;Parent=OE9A086702;Name=OE9A086702T1;product=OE9A086702P1
OE9A096707	111.91	2.18049	0.438695	4.9704	6.68137e-07	0.000346109	OE9A096707	ID=OE9A096707T1;Parent=OE9A096707;Name=OE9A096707T1;product=OE9A096707P1
OE9A027217	135.419	2.16955	0.313205	6.92692	4.30111e-12	1.36469e-08	OE9A027217	ID=OE9A027217T1;Parent=OE9A027217;Name=OE9A027217T1;product=OE9A027217P1
OE9A006353	15.3112	2.16486	0.671393	3.22443	0.00126224	0.0452536	OE9A006353	ID=OE9A006353T1;Parent=OE9A006353;Name=OE9A006353T1;product=OE9A006353P1;Description=stress enhanced 2, chloroplastic;Ontology_term=GO:0016020
OE9A023913	36.7251	2.15154	0.623555	3.45044	0.000559677	0.0274253	OE9A023913	ID=OE9A023913T1;Parent=OE9A023913;Name=OE9A023913T1;product=OE9A023913P1;Description=ankyrin repeat-containing BDA1-like;Ontology_term=GO:0005515%2C GO:0016020
OE9A101219	258.434	2.1507	0.375284	5.73087	9.99169e-09	1.10269e-05	OE9A101219	ID=OE9A101219T1;Parent=OE9A101219;Name=OE9A101219T1;product=OE9A101219P1;Description=major allergen Pru ar 1-like;Ontology_term=GO:0006952%2C GO:0009607
OE9A066209	73.6376	2.13385	0.409822	5.20678	1.92149e-07	0.000135481	OE9A066209	ID=OE9A066209T1;Parent=OE9A066209;Name=OE9A066209T1;product=OE9A066209P1;Description=zinc finger WIP2-like;Ontology_term=GO:0003676%2C GO:0046872
OE9A075700	25.0524	2.13205	0.561331	3.79819	0.000145754	0.0111773	OE9A075700	ID=OE9A075700T1;Parent=OE9A075700;Name=OE9A075700T1;product=OE9A075700P1
OE9A075888	633.176	2.1288	0.641028	3.32092	0.000897202	0.0370304	OE9A075888	ID=OE9A075888T1;Parent=OE9A075888;Name=OE9A075888T1;product=OE9A075888P1
OE9A068581	35.0716	2.12873	0.686475	3.10096	0.00192893	0.0588475	OE9A068581	ID=OE9A068581T1;Parent=OE9A068581;Name=OE9A068581T1;product=OE9A068581P1;Description=flavonoid 3 -hydroxylase;Ontology_term=GO:0005506%2C GO:0009813%2C GO:0016021%2C GO:0016711%2C GO:0020037%2C GO:0044550%2C GO:0055114
OE9A109360	21.4804	2.12816	0.714208	2.97974	0.00288491	0.0740058	OE9A109360	ID=OE9A109360T1;Parent=OE9A109360;Name=OE9A109360T1;product=OE9A109360P1;Description=PROTON GRADIENT REGULATION 5, chloroplastic;Ontology_term=GO:0009534%2C GO:0009642%2C GO:0009987
OE9A096047	652.232	2.11856	0.444808	4.76286	1.90868e-06	0.000754818	OE9A096047	ID=OE9A096047T2;Parent=OE9A096047;Name=OE9A096047T2;product=OE9A096047P2;Description=subtilisin-like protease;Ontology_term=GO:0004252%2C GO:0005618%2C GO:0006508%2C GO:0016020
OE9A012666	35.8192	2.10252	0.476429	4.41309	1.01908e-05	0.00195821	OE9A012666	ID=OE9A012666T1;Parent=OE9A012666;Name=OE9A012666T1;product=OE9A012666P1;Description=calmodulin 11;Ontology_term=GO:0005509%2C GO:0032440%2C GO:0055114
OE9A063911	212.434	2.08802	0.568129	3.67525	0.000237619	0.015707	OE9A063911	ID=OE9A063911T1;Parent=OE9A063911;Name=OE9A063911T1;product=OE9A063911P1;Description=nitrate reductase;Ontology_term=GO:0006809%2C GO:0009325%2C GO:0009703%2C GO:0020037%2C GO:0030151%2C GO:0042128%2C GO:0043546%2C GO:0050464%2C GO:0055114
OE9A075770	107.445	2.06918	0.325245	6.3619	1.99268e-10	4.21502e-07	OE9A075770	ID=OE9A075770T1;Parent=OE9A075770;Name=OE9A075770T1;product=OE9A075770P1;Description=thioredoxin m2;Ontology_term=GO:0000103%2C GO:0006118%2C GO:0006457%2C GO:0006662%2C GO:0009507%2C GO:0015035%2C GO:0016671%2C GO:0034599%2C GO:0045454%2C GO:0055114
OE9A021346	16.0021	2.06255	0.688164	2.99717	0.00272498	0.0717771	OE9A021346	ID=OE9A021346T1;Parent=OE9A021346;Name=OE9A021346T1;product=OE9A021346P1;Description=probable alpha,alpha-trehalose-phosphate synthase [UDP-forming] 9;Ontology_term=GO:0003824%2C GO:0005992
OE9A090999	110.477	2.05901	0.648323	3.1759	0.00149371	0.0497696	OE9A090999	ID=OE9A090999T1;Parent=OE9A090999;Name=OE9A090999T1;product=OE9A090999P1;Description=dirigent 5-like;Ontology_term=GO:0009699%2C GO:0042349%2C GO:0050790
OE9A003657	53.61	2.04753	0.465436	4.39917	1.08668e-05	0.00199878	OE9A003657	ID=OE9A003657T1;Parent=OE9A003657;Name=OE9A003657T1;product=OE9A003657P1;Description=ammonium transporter 3 member 1-like;Ontology_term=GO:0005887%2C GO:0008519%2C GO:0015695%2C GO:0019740%2C GO:0072488
OE9A042150	11.4037	2.02409	0.712089	2.84247	0.00447656	0.0955664	OE9A042150	ID=OE9A042150T1;Parent=OE9A042150;Name=OE9A042150T1;product=OE9A042150P1
OE9A097364	225.161	2.01853	0.696517	2.89804	0.00375506	0.087686	OE9A097364	ID=OE9A097364T1;Parent=OE9A097364;Name=OE9A097364T1;product=OE9A097364P1;Description=AUXIN-REGULATED GENE INVOLVED IN ORGAN SIZE;Ontology_term=GO:0016020
OE9A117708	39.4965	2.01443	0.466416	4.31896	1.56769e-05	0.00254705	OE9A117708	ID=OE9A117708T1;Parent=OE9A117708;Name=OE9A117708T1;product=OE9A117708P1;Description=auxin-induced 15A-like;Ontology_term=GO:0009733%2C GO:0016021
OE9A083586	24.6001	2.00909	0.6545	3.06965	0.00214307	0.0623111	OE9A083586	ID=OE9A083586T1;Parent=OE9A083586;Name=OE9A083586T1;product=OE9A083586P1;Description=3-ketoacyl- thiolase 2, peroxisomal-like;Ontology_term=GO:0008152%2C GO:0016747
OE9A001957	34.1844	2.00851	0.612664	3.27832	0.00104428	0.0409058	OE9A001957	ID=OE9A001957T1;Parent=OE9A001957;Name=OE9A001957T1;product=OE9A001957P1;Description=aspartic ase nepenthesin-1;Ontology_term=GO:0004190%2C GO:0006508%2C GO:0030163
OE9A059395	104.116	2.00152	0.378896	5.28249	1.2744e-07	9.80242e-05	OE9A059395	ID=OE9A059395T1;Parent=OE9A059395;Name=OE9A059395T1;product=OE9A059395P1;Description=casein kinase II subunit alpha-2;Ontology_term=GO:0004674%2C GO:0005524%2C GO:0006468%2C GO:0009069

## Sheet: ShinyGO FC >2
	Enrichment FDR	nGenes	Pathway Genes	Fold Enrichment	Pathways (click for details)	Genes
	0.00064	2	5	262.3	GO:0006809 Nitric oxide biosynthetic process	OE9A053718 OE9A063911
	0.00064	2	5	262.3	GO:0016099 Monoterpenoid biosynthetic process	OE9A051723 OE9A101533
	0.00064	2	5	262.3	GO:0043546 Molybdopterin cofactor binding	OE9A053718 OE9A063911
	0.00064	2	5	262.3	GO:0050464 Nitrate reductase (NADPH) activity	OE9A053718 OE9A063911
	0.00064	15	2739	3.6	GO:0055114 Oxidation-reduction process	OE9A012666 OE9A025701 OE9A033588 OE9A051723 OE9A053718 OE9A059588 OE9A063911 OE9A068581 OE9A073677 OE9A075770 OE9A079697 OE9A083241 OE9A084072 OE9A085630 OE9A101533
	0.0015	2	8	163.9	GO:0009703 Nitrate reductase (NADH) activity	OE9A053718 OE9A063911
	0.0016	2	9	145.7	GO:0042128 Nitrate assimilation	OE9A053718 OE9A063911
	0.0018	2	10	131.1	GO:0016628 Oxidoreductase activity, acting on the CH-CH group of donors, NAD or NADP as acceptor	OE9A051723 OE9A101533
	0.0023	2	12	109.3	GO:0030151 Molybdenum ion binding	OE9A053718 OE9A063911
	0.0038	2	16	82	GO:0009325 Nitrate reductase complex	OE9A053718 OE9A063911
	0.0055	3	95	20.7	GO:0032440 2-alkenal reductase [NAD(P)] activity	OE9A012666 OE9A025701 OE9A085630
	0.034	3	186	10.6	GO:0016747 Transferase activity, transferring acyl groups other than amino-acyl groups	OE9A076251 OE9A083586 OE9A121409
	0.049	1	3	218.6	GO:0050559 Copalyl diphosphate synthase activity	OE9A044770

## Sheet: DOWN FC <-2
List of Differential Expressed Genes (DEGs) FC <-2 in T6_MockPsJN_
Gene ID	baseMean	log2FoldChange	lfcSE	stat	pvalue	padj	id gene	Description
OE9A018150	14.118	-6.91558	1.87072	-3.69676	0.000218371	0.0149405	OE9A018150	ID=OE9A018150T1;Parent=OE9A018150;Name=OE9A018150T1;product=OE9A018150P1;Description=LOB domain-containing 25-like isoform X2;Ontology_term=GO:0005515
OE9A016940	16.3421	-6.28088	1.42405	-4.41057	1.03097e-05	0.00195821	OE9A016940	ID=OE9A016940T1;Parent=OE9A016940;Name=OE9A016940T1;product=OE9A016940P1;Description=calcium-binding PBP1-like;Ontology_term=GO:0005509
OE9A074401	19.4695	-5.63493	1.31677	-4.27935	1.87436e-05	0.00276609	OE9A074401	ID=OE9A074401T1;Parent=OE9A074401;Name=OE9A074401T1;product=OE9A074401P1;Description=exocyst complex component EXO70A1-like;Ontology_term=GO:0000145%2C GO:0006887
OE9A008141	148.034	-5.5441	0.897101	-6.18002	6.40926e-10	1.01679e-06	OE9A008141	ID=OE9A008141T1;Parent=OE9A008141;Name=OE9A008141T1;product=OE9A008141P1;Description=xyloglucan endotransglucosylase hydrolase 2-like;Ontology_term=GO:0004553%2C GO:0005618%2C GO:0010411%2C GO:0016762%2C GO:0042546%2C GO:0048046
OE9A099586	9.76608	-4.92769	1.48946	-3.30837	0.000938398	0.0381315	OE9A099586	ID=OE9A099586T1;Parent=OE9A099586;Name=OE9A099586T1;product=OE9A099586P1;Description=probable E3 ubiquitin- ligase LUL4;Ontology_term=GO:0005515%2C GO:0008270
OE9A003506	11.292	-4.84147	1.49128	-3.24653	0.00116823	0.0434161	OE9A003506	ID=OE9A003506T1;Parent=OE9A003506;Name=OE9A003506T1;product=OE9A003506P1;Description=probable 1-deoxy-D-xylulose-5-phosphate synthase 2, chloroplastic;Ontology_term=GO:0006694%2C GO:0008661%2C GO:0016114
OE9A032361	993.227	-4.74326	0.580507	-8.17089	3.06134e-16	7.7706e-12	OE9A032361	ID=OE9A032361T1;Parent=OE9A032361;Name=OE9A032361T1;product=OE9A032361P1;Description=probable xyloglucan endotransglucosylase hydrolase 23;Ontology_term=GO:0004553%2C GO:0005618%2C GO:0010411%2C GO:0016762%2C GO:0042546%2C GO:0048046%2C GO:0071555
OE9A094563	32.2601	-4.70791	1.1613	-4.05399	5.03512e-05	0.00534755	OE9A094563	ID=OE9A094563T1;Parent=OE9A094563;Name=OE9A094563T1;product=OE9A094563P1;Description=CUB and sushi domain-containing 3;Ontology_term=GO:0006118%2C GO:0009055
OE9A106632	10.4263	-4.58297	1.22112	-3.75309	0.000174667	0.0128138	OE9A106632	ID=OE9A106632T1;Parent=OE9A106632;Name=OE9A106632T1;product=OE9A106632P1;Description=zinc finger 91-like;Ontology_term=GO:0046872
OE9A040224	31.8083	-4.53783	1.11681	-4.06323	4.83993e-05	0.0052178	OE9A040224	ID=OE9A040224T1;Parent=OE9A040224;Name=OE9A040224T1;product=OE9A040224P1;Description=aluminum-activated malate transporter 2-like;Ontology_term=GO:0009705%2C GO:0015140%2C GO:0016021%2C GO:0071423
OE9A015659	1054.11	-4.45591	1.14082	-3.90588	9.38814e-05	0.00824564	OE9A015659	ID=OE9A015659T1;Parent=OE9A015659;Name=OE9A015659T1;product=OE9A015659P1;Description=kirola-like;Ontology_term=GO:0006952%2C GO:0009607
OE9A051907	14.5722	-4.18693	0.954587	-4.38612	1.1539e-05	0.00207727	OE9A051907	ID=OE9A051907T1;Parent=OE9A051907;Name=OE9A051907T1;product=OE9A051907P1;Description=UDP-glucose:glyco glucosyltransferase isoform X1;Ontology_term=GO:0003980%2C GO:0006486%2C GO:0097359
OE9A005200	10.6541	-4.18182	1.44077	-2.90248	0.0037022	0.0872373	OE9A005200	ID=OE9A005200T1;Parent=OE9A005200;Name=OE9A005200T1;product=OE9A005200P1;Description=glycerol-3-phosphate acyltransferase 1;Ontology_term=GO:0005739%2C GO:0010143%2C GO:0016021%2C GO:0016311%2C GO:0016791%2C GO:0048235%2C GO:0090447
OE9A018186	21.0601	-4.17779	1.12313	-3.71976	0.00019941	0.0139824	OE9A018186	ID=OE9A018186T1;Parent=OE9A018186;Name=OE9A018186T1;product=OE9A018186P1
OE9A079186	12.9199	-4.11101	1.30161	-3.15841	0.00158634	0.0520234	OE9A079186	ID=OE9A079186T1;Parent=OE9A079186;Name=OE9A079186T1;product=OE9A079186P1
OE9A013267	14.4045	-3.95422	1.08467	-3.64556	0.000266812	0.016889	OE9A013267	ID=OE9A013267T1;Parent=OE9A013267;Name=OE9A013267T1;product=OE9A013267P1;Description=calmodulin-binding 60 B-like;Ontology_term=GO:0005516%2C GO:0006950
OE9A038318	48.0811	-3.74811	1.16058	-3.22952	0.00124	0.0448361	OE9A038318	ID=OE9A038318T1;Parent=OE9A038318;Name=OE9A038318T1;product=OE9A038318P1;Description=xyloglucan endotransglucosylase hydrolase 2-like;Ontology_term=GO:0004553%2C GO:0005618%2C GO:0010411%2C GO:0016762%2C GO:0042546%2C GO:0048046
OE9A037077	38.6015	-3.70824	1.05437	-3.51702	0.000436424	0.0229784	OE9A037077	ID=OE9A037077T1;Parent=OE9A037077;Name=OE9A037077T1;product=OE9A037077P1
OE9A073838	14.2752	-3.47665	0.743918	-4.67343	2.96209e-06	0.000933442	OE9A073838	ID=OE9A073838T1;Parent=OE9A073838;Name=OE9A073838T1;product=OE9A073838P1;Description=ethylene-responsive transcription factor ERF027-like;Ontology_term=GO:0003677%2C GO:0003700%2C GO:0005667%2C GO:0006355%2C GO:0045449
OE9A065276	17.1041	-3.45723	0.843923	-4.09662	4.1923e-05	0.00466725	OE9A065276	ID=OE9A065276T1;Parent=OE9A065276;Name=OE9A065276T1;product=OE9A065276P1;md5=81bac2ab6db63a0b255bd05429b062ff;INTERPRO=<table><tr><th>DB</th><th>ID</th><th>Description</th></tr><tr><td>PANTHER</td><td>PTHR23155</td><td></td></tr><tr><td>PANTHER</td><td>PTHR23155:SF634</td><td></td></tr><tr><td>Pfam</td><td>PF00931</td><td>NB-ARC domain</td></tr><tr><td>SUPERFAMILY</td><td>SSF52058</td><td></td></…
OE9A117817	10.2419	-3.39811	0.949367	-3.57934	0.000344458	0.0197367	OE9A117817	ID=OE9A117817T1;Parent=OE9A117817;Name=OE9A117817T1;product=OE9A117817P1
OE9A100291	1350.99	-3.35874	0.609365	-5.51187	3.55048e-08	3.33784e-05	OE9A100291	ID=OE9A100291T1;Parent=OE9A100291;Name=OE9A100291T1;product=OE9A100291P1;Description=xyloglucan endotransglycosylase hydrolase;Ontology_term=GO:0004553%2C GO:0005618%2C GO:0010411%2C GO:0016762%2C GO:0042546%2C GO:0048046%2C GO:0071555
OE9A013267	12.429	-3.31019	0.893909	-3.70305	0.000213019	0.0147451	OE9A013267	ID=OE9A013267T1;Parent=OE9A013267;Name=OE9A013267T1;product=OE9A013267P1;Description=calmodulin-binding 60 B-like;Ontology_term=GO:0005516%2C GO:0006950
OE9A046659	10.6164	-3.25473	0.983965	-3.30777	0.000940406	0.0381315	OE9A046659	ID=OE9A046659T3;Parent=OE9A046659;Name=OE9A046659T3;product=OE9A046659P3;Description=inactive TPR repeat-containing thioredoxin TTL3-like;Ontology_term=GO:0005515%2C GO:0045454
OE9A038581	32.1482	-3.18833	1.10696	-2.88026	0.00397342	0.090455	OE9A038581	ID=OE9A038581T1;Parent=OE9A038581;Name=OE9A038581T1;product=OE9A038581P1;Description=ethylene-responsive transcription factor ERF003-like;Ontology_term=GO:0003677%2C GO:0003700%2C GO:0005667%2C GO:0006355%2C GO:0045449
OE9A089262	13.5888	-3.1874	1.05843	-3.01145	0.00260004	0.0694898	OE9A089262	ID=OE9A089262T1;Parent=OE9A089262;Name=OE9A089262T1;product=OE9A089262P1
OE9A117660	75.5543	-3.17209	0.714092	-4.44213	8.90734e-06	0.00184321	OE9A117660	ID=OE9A117660T1;Parent=OE9A117660;Name=OE9A117660T1;product=OE9A117660P1;Description=xyloglucan endotransglucosylase hydrolase 2-like;Ontology_term=GO:0004553%2C GO:0005618%2C GO:0010411%2C GO:0016762%2C GO:0042546%2C GO:0048046
OE9A112468	17.1069	-3.15784	1.03134	-3.06188	0.0021995	0.0629399	OE9A112468	ID=OE9A112468T1;Parent=OE9A112468;Name=OE9A112468T1;product=OE9A112468P1;Description=xyloglucan endotransglucosylase hydrolase 2-like;Ontology_term=GO:0004553%2C GO:0005618%2C GO:0010411%2C GO:0016762%2C GO:0042546%2C GO:0048046
OE9A041022	941.488	-3.10357	0.484863	-6.40093	1.54429e-10	3.56352e-07	OE9A041022	ID=OE9A041022T1;Parent=OE9A041022;Name=OE9A041022T1;product=OE9A041022P1;Description=xyloglucan endotransglycosylase hydrolase;Ontology_term=GO:0004553%2C GO:0005618%2C GO:0010411%2C GO:0016762%2C GO:0042546%2C GO:0048046%2C GO:0071555
OE9A001646	18.7145	-3.06556	0.887082	-3.45578	0.000548698	0.0270439	OE9A001646	ID=OE9A001646T1;Parent=OE9A001646;Name=OE9A001646T1;product=OE9A001646P1;Description=transcription factor myb56;Ontology_term=GO:0003677
OE9A106276	134.318	-2.97123	0.540222	-5.50001	3.79779e-08	3.44283e-05	OE9A106276	ID=OE9A106276T1;Parent=OE9A106276;Name=OE9A106276T1;product=OE9A106276P1;Description=, chromosomal-like;Ontology_term=GO:0005515%2C GO:0005524
OE9A090863	3121.95	-2.92399	0.461669	-6.33352	2.39636e-10	4.67898e-07	OE9A090863	ID=OE9A090863T1;Parent=OE9A090863;Name=OE9A090863T1;product=OE9A090863P1;Description=xyloglucan endotransglycosylase hydrolase;Ontology_term=GO:0004553%2C GO:0005618%2C GO:0010411%2C GO:0016762%2C GO:0042546%2C GO:0048046%2C GO:0071555
OE9A082187	52.3381	-2.89447	0.626629	-4.61912	3.85377e-06	0.00109911	OE9A082187	ID=OE9A082187T1;Parent=OE9A082187;Name=OE9A082187T1;product=OE9A082187P1
OE9A050860	39.648	-2.89079	0.976002	-2.96187	0.00305777	0.0766193	OE9A050860	ID=OE9A050860T1;Parent=OE9A050860;Name=OE9A050860T1;product=OE9A050860P1
OE9A055755	50.9105	-2.88457	0.737614	-3.91068	9.20353e-05	0.00819696	OE9A055755	ID=OE9A055755T1;Parent=OE9A055755;Name=OE9A055755T1;product=OE9A055755P1
OE9A001047	12.7851	-2.82931	0.788391	-3.58872	0.000332308	0.0193908	OE9A001047	ID=OE9A001047T1;Parent=OE9A001047;Name=OE9A001047T1;product=OE9A001047P1
OE9A010597	15.3174	-2.81839	0.72928	-3.86462	0.00011126	0.00925308	OE9A010597	ID=OE9A010597T1;Parent=OE9A010597;Name=OE9A010597T1;product=OE9A010597P1;Description=monocopper oxidase SKU5;Ontology_term=GO:0005507%2C GO:0009505%2C GO:0009506%2C GO:0016722%2C GO:0046658%2C GO:0055114
OE9A017749	75.0037	-2.8078	0.626884	-4.47898	7.49994e-06	0.00164113	OE9A017749	ID=OE9A017749T1;Parent=OE9A017749;Name=OE9A017749T1;product=OE9A017749P1
OE9A118576	20.6137	-2.78906	0.843521	-3.30645	0.000944856	0.0382196	OE9A118576	ID=OE9A118576T1;Parent=OE9A118576;Name=OE9A118576T1;product=OE9A118576P1
OE9A091063	107.794	-2.78824	0.622042	-4.48239	7.3811e-06	0.00164113	OE9A091063	ID=OE9A091063T1;Parent=OE9A091063;Name=OE9A091063T1;product=OE9A091063P1;Description=Mediator of RNA polymerase II transcription subunit 18,;Ontology_term=GO:0016020
OE9A115301	42.4837	-2.77137	0.908263	-3.05128	0.00227866	0.0646249	OE9A115301	ID=OE9A115301T1;Parent=OE9A115301;Name=OE9A115301T1;product=OE9A115301P1
OE9A048275	24.6588	-2.76487	0.634786	-4.35559	1.32707e-05	0.0023072	OE9A048275	ID=OE9A048275T1;Parent=OE9A048275;Name=OE9A048275T1;product=OE9A048275P1
OE9A052403	9.83765	-2.75308	0.864172	-3.1858	0.00144352	0.0491024	OE9A052403	ID=OE9A052403T1;Parent=OE9A052403;Name=OE9A052403T1;product=OE9A052403P1;Description=phosphatidate cytidylyltransferase 1-like;Ontology_term=GO:0004605%2C GO:0005789%2C GO:0006655%2C GO:0016021%2C GO:0016024
OE9A077542	25.4434	-2.74226	0.912745	-3.00441	0.00266099	0.0705347	OE9A077542	ID=OE9A077542T1;Parent=OE9A077542;Name=OE9A077542T1;product=OE9A077542P1;Description=calcium-transporting ATPase 13, plasma membrane-type;Ontology_term=GO:0005388%2C GO:0005524%2C GO:0016021%2C GO:0016529%2C GO:0046872%2C GO:0070588
OE9A003539	13.1566	-2.69507	0.915236	-2.94467	0.00323301	0.0795961	OE9A003539	ID=OE9A003539T1;Parent=OE9A003539;Name=OE9A003539T1;product=OE9A003539P1;Description=Spindle pole body;Ontology_term=GO:0015031
OE9A117957	12.1367	-2.67662	0.80151	-3.33948	0.00083936	0.0355091	OE9A117957	ID=OE9A117957T1;Parent=OE9A117957;Name=OE9A117957T1;product=OE9A117957P1
OE9A033879	95.2809	-2.67249	0.58078	-4.60155	4.19351e-06	0.001157	OE9A033879	ID=OE9A033879T1;Parent=OE9A033879;Name=OE9A033879T1;product=OE9A033879P1;Description=ethylene-responsive transcription factor ERF109-like;Ontology_term=GO:0003677%2C GO:0003700%2C GO:0005667%2C GO:0006355%2C GO:0045449
OE9A106252	103.131	-2.65452	0.933234	-2.84443	0.00444906	0.0954296	OE9A106252	ID=OE9A106252T1;Parent=OE9A106252;Name=OE9A106252T1;product=OE9A106252P1;Description=laccase-12-like;Ontology_term=GO:0005507%2C GO:0046274%2C GO:0048046%2C GO:0052716%2C GO:0055114
OE9A106781	49.9616	-2.65227	0.881181	-3.0099	0.00261334	0.0695329	OE9A106781	ID=OE9A106781T1;Parent=OE9A106781;Name=OE9A106781T1;product=OE9A106781P1;Description=monothiol glutaredoxin-S10-like;Ontology_term=GO:0005623%2C GO:0006118%2C GO:0009055%2C GO:0015035%2C GO:0045454%2C GO:0055114
OE9A047382	78.0641	-2.64811	0.693995	-3.81575	0.000135768	0.0106679	OE9A047382	ID=OE9A047382T1;Parent=OE9A047382;Name=OE9A047382T1;product=OE9A047382P1;Description=dirigent 23-like;Ontology_term=GO:0009699%2C GO:0042349%2C GO:0050790
OE9A050511	124.353	-2.63798	0.82665	-3.19117	0.001417	0.048535	OE9A050511	ID=OE9A050511T1;Parent=OE9A050511;Name=OE9A050511T1;product=OE9A050511P1
OE9A025409	14.0597	-2.61609	0.831555	-3.14602	0.0016551	0.0531761	OE9A025409	ID=OE9A025409T1;Parent=OE9A025409;Name=OE9A025409T1;product=OE9A025409P1;Description=CSC1 RXW8;Ontology_term=GO:0016021
OE9A106276	23.9848	-2.61273	0.705576	-3.70297	0.000213089	0.0147451	OE9A106276	ID=OE9A106276T1;Parent=OE9A106276;Name=OE9A106276T1;product=OE9A106276P1;Description=, chromosomal-like;Ontology_term=GO:0005515%2C GO:0005524
OE9A084477	66.6109	-2.60018	0.572844	-4.53907	5.6504e-06	0.00139247	OE9A084477	ID=OE9A084477T1;Parent=OE9A084477;Name=OE9A084477T1;product=OE9A084477P1;Description=receptor kinase THESEUS 1;Ontology_term=GO:0004674%2C GO:0005524%2C GO:0006468%2C GO:0009069%2C GO:0016021
OE9A017022	42.8874	-2.57328	0.711851	-3.61492	0.000300445	0.0181576	OE9A017022	ID=OE9A017022T1;Parent=OE9A017022;Name=OE9A017022T1;product=OE9A017022P1;Description=glycerophosphodiester phosphodiesterase GDPDL3-like;Ontology_term=GO:0006071%2C GO:0008889%2C GO:0009395%2C GO:0016021%2C GO:0046486
OE9A104121	18.2296	-2.57224	0.854172	-3.01138	0.00260064	0.0694898	OE9A104121	ID=OE9A104121T1;Parent=OE9A104121;Name=OE9A104121T1;product=OE9A104121P1
OE9D003824	12.2909	-2.54052	0.687736	-3.69403	0.000220724	0.0150205	OE9D003824	ID=OE9D003824T1;Parent=OE9D003824;product=OE9D003824P1;Description=RNA polymerase II C-terminal domain phosphatase-like 4;Ontology_term=GO:0008287%2C GO:0008420%2C GO:0016591%2C GO:0070940;
OE9A009930	20.5503	-2.53206	0.89396	-2.83241	0.00461983	0.0975572	OE9A009930	ID=OE9A009930T1;Parent=OE9A009930;Name=OE9A009930T1;product=OE9A009930P1;Description=dehydration-responsive element-binding 1E-like;Ontology_term=GO:0003677%2C GO:0003700%2C GO:0005634%2C GO:0005667%2C GO:0006355%2C GO:0045449
OE9A105783	132.442	-2.51144	0.36392	-6.90107	5.1613e-12	1.45566e-08	OE9A105783	ID=OE9A105783T1;Parent=OE9A105783;Name=OE9A105783T1;product=OE9A105783P1
OE9A109441	23.1327	-2.49327	0.871134	-2.8621	0.00420849	0.0932418	OE9A109441	ID=OE9A109441T1;Parent=OE9A109441;Name=OE9A109441T1;product=OE9A109441P1;Description=subtilisin-like protease;Ontology_term=GO:0004252%2C GO:0005618%2C GO:0006508
OE9A083347	236.034	-2.4609	0.488632	-5.03631	4.74592e-07	0.000262711	OE9A083347	ID=OE9A083347T1;Parent=OE9A083347;Name=OE9A083347T1;product=OE9A083347P1;Description=lysosomal beta glucosidase-like;Ontology_term=GO:0004553%2C GO:0005975
OE9A083760	18.2167	-2.45267	0.62254	-3.93978	8.15559e-05	0.00748134	OE9A083760	ID=OE9A083760T1;Parent=OE9A083760;Name=OE9A083760T1;product=OE9A083760P1;Description=transcription factor ILR3;Ontology_term=GO:0046983
OE9A078548	31.6568	-2.43791	0.666994	-3.65507	0.00025711	0.016564	OE9A078548	ID=OE9A078548T1;Parent=OE9A078548;Name=OE9A078548T1;product=OE9A078548P1;Description=trichome birefringence-like 38;Ontology_term=GO:0016021
OE9A079040	23.523	-2.43625	0.712735	-3.41817	0.000630438	0.0289374	OE9A079040	ID=OE9A079040T1;Parent=OE9A079040;Name=OE9A079040T1;product=OE9A079040P1
OE9A001081	48.7186	-2.42068	0.518928	-4.66477	3.08965e-06	0.000944873	OE9A001081	ID=OE9A001081T1;Parent=OE9A001081;Name=OE9A001081T1;product=OE9A001081P1
OE9A043535	71.1883	-2.41968	0.588254	-4.11332	3.90012e-05	0.00447662	OE9A043535	ID=OE9A043535T1;Parent=OE9A043535;Name=OE9A043535T1;product=OE9A043535P1;Description=dirigent 23-like;Ontology_term=GO:0009699%2C GO:0042349%2C GO:0050790
OE9A121134	33.954	-2.41905	0.608093	-3.97809	6.94696e-05	0.00665414	OE9A121134	ID=OE9A121134T1;Parent=OE9A121134;Name=OE9A121134T1;product=OE9A121134P1
OE9A001120	33.9047	-2.41578	0.566465	-4.26465	2.00216e-05	0.00287123	OE9A001120	ID=OE9A001120T1;Parent=OE9A001120;Name=OE9A001120T1;product=OE9A001120P1;Description=hydrolase, hydrolyzing O-glycosyl compounds,;Ontology_term=GO:0004553%2C GO:0005975
OE9A046625	56.2481	-2.41145	0.821992	-2.93366	0.00334989	0.0818387	OE9A046625	ID=OE9A046625T1;Parent=OE9A046625;Name=OE9A046625T1;product=OE9A046625P1
OE9A106917	15.6619	-2.41108	0.74639	-3.23032	0.00123651	0.0448361	OE9A106917	ID=OE9A106917T1;Parent=OE9A106917;Name=OE9A106917T1;product=OE9A106917P1
OE9A026029	13.332	-2.41107	0.775695	-3.10827	0.00188184	0.0577079	OE9A026029	ID=OE9A026029T1;Parent=OE9A026029;Name=OE9A026029T1;product=OE9A026029P1;Description=SHOOT GRAVITROPISM 6 isoform X1;Ontology_term=GO:0005488%2C GO:0009660%2C GO:0009705%2C GO:0009959
OE9A069640	28.5844	-2.40482	0.797476	-3.01553	0.00256528	0.0689262	OE9A069640	ID=OE9A069640T1;Parent=OE9A069640;Name=OE9A069640T1;product=OE9A069640P1;Description=probable inactive receptor kinase At1g48480;Ontology_term=GO:0004672%2C GO:0005524%2C GO:0006468%2C GO:0016021
OE9A055286	13.915	-2.40262	0.801993	-2.99581	0.00273714	0.0718005	OE9A055286	ID=OE9A055286T1;Parent=OE9A055286;Name=OE9A055286T1;product=OE9A055286P1;Description=glucuronoxylan 4-O-methyltransferase 3-like;Ontology_term=GO:0045492
OE9A024908	14.0781	-2.39338	0.796804	-3.00372	0.002667	0.0705347	OE9A024908	ID=OE9A024908T1;Parent=OE9A024908;Name=OE9A024908T1;product=OE9A024908P1;Description=nuclear cap-binding subunit 2;Ontology_term=GO:0000166%2C GO:0000339%2C GO:0000394%2C GO:0005846%2C GO:0031053%2C GO:0045292
OE9A119079	49.0176	-2.37031	0.677925	-3.49641	0.000471563	0.0242301	OE9A119079	ID=OE9A119079T1;Parent=OE9A119079;Name=OE9A119079T1;product=OE9A119079P1;Description=plant cysteine oxidase 2-like;Ontology_term=GO:0016702%2C GO:0055114
OE9A022913	13.3325	-2.32651	0.809717	-2.87323	0.00406294	0.0915894	OE9A022913	ID=OE9A022913T1;Parent=OE9A022913;Name=OE9A022913T1;product=OE9A022913P1
OE9A020495	22.4834	-2.3255	0.686644	-3.38675	0.000707247	0.0316615	OE9A020495	ID=OE9A020495T1;Parent=OE9A020495;Name=OE9A020495T1;product=OE9A020495P1;Description=phospholipase A1-Ibeta2, chloroplastic;Ontology_term=GO:0004806%2C GO:0008970%2C GO:0009395%2C GO:0009507%2C GO:0046486%2C GO:0047714
OE9A046123	84.5974	-2.29836	0.737402	-3.11684	0.001828	0.0565166	OE9A046123	ID=OE9A046123T1;Parent=OE9A046123;Name=OE9A046123T1;product=OE9A046123P1;Description=feruloyl ortho-hydroxylase 1-like;Ontology_term=GO:0016491%2C GO:0046872%2C GO:0055114
OE9A095034	2494.54	-2.27125	0.446467	-5.08716	3.63459e-07	0.000225017	OE9A095034	ID=OE9A095034T1;Parent=OE9A095034;Name=OE9A095034T1;product=OE9A095034P1
OE9A016967	133.578	-2.26205	0.567193	-3.98816	6.6589e-05	0.00645125	OE9A016967	ID=OE9A016967T1;Parent=OE9A016967;Name=OE9A016967T1;product=OE9A016967P1;Description=ethylene-responsive transcription factor ERF014-like;Ontology_term=GO:0003677%2C GO:0003700%2C GO:0005667%2C GO:0006355%2C GO:0045449
OE9A106082	68.0045	-2.25987	0.581458	-3.88656	0.000101677	0.00874869	OE9A106082	ID=OE9A106082T1;Parent=OE9A106082;Name=OE9A106082T1;product=OE9A106082P1
OE9A107254	65.1213	-2.25685	0.612094	-3.6871	0.00022682	0.0152424	OE9A107254	ID=OE9A107254T1;Parent=OE9A107254;Name=OE9A107254T1;product=OE9A107254P1;Description=hypothetical protein DCAR_020470;Ontology_term=GO:0016020
OE9A027958	21.9266	-2.23525	0.700492	-3.19098	0.00141793	0.048535	OE9A027958	ID=OE9A027958T1;Parent=OE9A027958;Name=OE9A027958T1;product=OE9A027958P1
OE9A091939	17.0808	-2.22898	0.781019	-2.85393	0.00431817	0.0943879	OE9A091939	ID=OE9A091939T2;Parent=OE9A091939;Name=OE9A091939T2;product=OE9A091939P2;Description=aspartic ase 2 isoform X2;Ontology_term=GO:0004190%2C GO:0006508%2C GO:0016021%2C GO:0030163
OE9A083464	102.772	-2.21503	0.614362	-3.60541	0.000311663	0.018614	OE9A083464	ID=OE9A083464T1;Parent=OE9A083464;Name=OE9A083464T1;product=OE9A083464P1
OE9A103007	37.2317	-2.20618	0.643301	-3.42947	0.000604772	0.0283751	OE9A103007	ID=OE9A103007T1;Parent=OE9A103007;Name=OE9A103007T1;product=OE9A103007P1;Description=probable inactive poly [ADP-ribose] polymerase SRO5;Ontology_term=GO:0003950
OE9A014008	34.9053	-2.19096	0.670611	-3.26711	0.00108653	0.0420391	OE9A014008	ID=OE9A014008T1;Parent=OE9A014008;Name=OE9A014008T1;product=OE9A014008P1;Description=LIM domain-containing WLIM1-like;Ontology_term=GO:0008270
OE9A028568	16.0262	-2.17564	0.756747	-2.87499	0.00404044	0.0915028	OE9A028568	ID=OE9A028568T1;Parent=OE9A028568;Name=OE9A028568T1;product=OE9A028568P1
OE9A009353	80.6893	-2.15782	0.478173	-4.51263	6.40277e-06	0.00151889	OE9A009353	ID=OE9A009353T1;Parent=OE9A009353;Name=OE9A009353T1;product=OE9A009353P1;Description=soluble inorganic pyrophosphatase 1;Ontology_term=GO:0000287%2C GO:0004427%2C GO:0005737%2C GO:0006119
OE9A087505	52.7791	-2.13458	0.615801	-3.46634	0.000527588	0.026207	OE9A087505	ID=OE9A087505T1;Parent=OE9A087505;Name=OE9A087505T1;product=OE9A087505P1;Description=agamous-like MADS-box AGL81;Ontology_term=GO:0003677%2C GO:0046983
OE9A071510	160.492	-2.12635	0.532435	-3.99363	6.50683e-05	0.00637695	OE9A071510	ID=OE9A071510T1;Parent=OE9A071510;Name=OE9A071510T1;product=OE9A071510P1;Description=linoleate 13S-lipoxygenase 2-1, chloroplastic-like;Ontology_term=GO:0005515%2C GO:0016702%2C GO:0031408%2C GO:0046872%2C GO:0055114
OE9A082439	31.5407	-2.11401	0.478228	-4.42051	9.84704e-06	0.00194693	OE9A082439	ID=OE9A082439T1;Parent=OE9A082439;Name=OE9A082439T1;product=OE9A082439P1;Description=transcription factor bHLH13-like;Ontology_term=GO:0046983
OE9A073161	42.9549	-2.11153	0.661836	-3.19041	0.00142069	0.048535	OE9A073161	ID=OE9A073161T1;Parent=OE9A073161;Name=OE9A073161T1;product=OE9A073161P1;Description=ethylene-responsive transcription factor ERF024;Ontology_term=GO:0003677%2C GO:0003700%2C GO:0005634%2C GO:0005667%2C GO:0006355%2C GO:0045449
OE9A020664	57.2888	-2.0876	0.564878	-3.69566	0.000219314	0.0149646	OE9A020664	ID=OE9A020664T1;Parent=OE9A020664;Name=OE9A020664T1;product=OE9A020664P1
OE9A036088	52.8618	-2.08205	0.724601	-2.87337	0.00406112	0.0915894	OE9A036088	ID=OE9A036088T1;Parent=OE9A036088;Name=OE9A036088T1;product=OE9A036088P1;Description=polygalacturonase inhibitor-like;Ontology_term=GO:0005515
OE9A114387	146.492	-2.07378	0.562447	-3.68706	0.000226859	0.0152424	OE9A114387	ID=OE9A114387T1;Parent=OE9A114387;Name=OE9A114387T1;product=OE9A114387P1;Description=C-repeat dehydration-responsive element-binding factor 4;Ontology_term=GO:0003677%2C GO:0003700%2C GO:0005634%2C GO:0005667%2C GO:0006355%2C GO:0045449
OE9A100632	46.351	-2.07047	0.728861	-2.8407	0.00450153	0.0960187	OE9A100632	ID=OE9A100632T1;Parent=OE9A100632;Name=OE9A100632T1;product=OE9A100632P1;Description=cytochrome P450 86B1-like;Ontology_term=GO:0004497%2C GO:0005506%2C GO:0016021%2C GO:0016705%2C GO:0020037%2C GO:0055114
OE9A073057	22.7819	-2.06781	0.587204	-3.52145	0.00042919	0.0226961	OE9A073057	ID=OE9A073057T1;Parent=OE9A073057;Name=OE9A073057T1;product=OE9A073057P1;Description=coatomer subunit alpha-1-like;Ontology_term=GO:0000139%2C GO:0005198%2C GO:0005515%2C GO:0006886%2C GO:0006888%2C GO:0006890%2C GO:0006891%2C GO:0030126
OE9A027867	1690.72	-2.06649	0.32801	-6.30008	2.97493e-10	5.03417e-07	OE9A027867	ID=OE9A027867T1;Parent=OE9A027867;Name=OE9A027867T1;product=OE9A027867P1;Description=calcium-transporting ATPase 11, plasma membrane-type;Ontology_term=GO:0005388%2C GO:0005516%2C GO:0005524%2C GO:0005887%2C GO:0016529%2C GO:0046872%2C GO:0070588
OE9A064167	524.188	-2.03832	0.426579	-4.77829	1.76793e-06	0.000712306	OE9A064167	ID=OE9A064167T1;Parent=OE9A064167;Name=OE9A064167T1;product=OE9A064167P1;Description=L-ascorbate oxidase homolog;Ontology_term=GO:0005507%2C GO:0006118%2C GO:0008447%2C GO:0009505%2C GO:0009506%2C GO:0016722%2C GO:0019852%2C GO:0055114
OE9A102745	41.5389	-2.03432	0.556309	-3.65682	0.000255363	0.0164933	OE9A102745	ID=OE9A102745T1;Parent=OE9A102745;Name=OE9A102745T1;product=OE9A102745P1;Description=clathrin assembly At1g03050;Ontology_term=GO:0005545%2C GO:0030136%2C GO:0030276%2C GO:0048268
OE9A043744	54.6573	-2.01498	0.518986	-3.88253	0.000103377	0.00883507	OE9A043744	ID=OE9A043744T4;Parent=OE9A043744;Name=OE9A043744T4;product=OE9A043744P1

## Sheet: ShinyGO FC <-2
	Enrichment FDR	nGenes	Pathway Genes	Fold Enrichment	Pathways (click for details)	Genes
	1.1e-10	8	73	61.1	GO:0016762 Xyloglucan:xyloglucosyl transferase activity	OE9A008141 OE9A032361 OE9A038318 OE9A041022 OE9A090863 OE9A100291 OE9A112468 OE9A117660
	2.9e-10	8	89	50.1	GO:0042546 Cell wall biogenesis	OE9A008141 OE9A032361 OE9A038318 OE9A041022 OE9A090863 OE9A100291 OE9A112468 OE9A117660
	3.6e-09	9	195	25.7	GO:0048046 Apoplast	OE9A008141 OE9A032361 OE9A038318 OE9A041022 OE9A090863 OE9A100291 OE9A106252 OE9A112468 OE9A117660
	4.1e-09	8	134	33.3	GO:0010411 Xyloglucan metabolic process	OE9A008141 OE9A032361 OE9A038318 OE9A041022 OE9A090863 OE9A100291 OE9A112468 OE9A117660
	1.3e-08	10	334	16.7	GO:0004553 Hydrolase activity, hydrolyzing O-glycosyl compounds	OE9A001120 OE9A008141 OE9A032361 OE9A038318 OE9A041022 OE9A083347 OE9A090863 OE9A100291 OE9A112468 OE9A117660
	9.6e-05	9	698	7.2	GO:0005618 Cell wall	OE9A008141 OE9A032361 OE9A038318 OE9A041022 OE9A090863 OE9A100291 OE9A109441 OE9A112468 OE9A117660
	0.01	4	215	10.4	GO:0071555 Cell wall organization	OE9A032361 OE9A041022 OE9A090863 OE9A100291
	0.025	2	38	29.3	GO:0016529 Sarcoplasmic reticulum	OE9A027867 OE9A077542
	0.025	2	36	31	GO:0042349 Guiding stereospecific synthesis activity	OE9A043535 OE9A047382
	0.025	2	38	29.3	GO:0005388 Calcium-transporting ATPase activity	OE9A027867 OE9A077542
	0.026	2	41	27.2	GO:0009699 Phenylpropanoid biosynthetic process	OE9A043535 OE9A047382
	0.036	2	50	22.3	GO:0070588 Calcium ion transmembrane transport	OE9A027867 OE9A077542
	0.036	1	3	185.8	GO:0000394 RNA splicing, via endonucleolytic cleavage and ligation	OE9A024908
	0.036	1	3	185.8	GO:0009660 Amyloplast organization	OE9A026029
	0.036	2	56	19.9	GO:0016702 Oxidoreductase activity, acting on single donors with incorporation of molecular oxygen,	OE9A071510 OE9A119079
	0.036	2	58	19.2	GO:0016722 Oxidoreductase activity, oxidizing metal ions	OE9A010597 OE9A064167
	0.036	7	1164	3.4	GO:0003700 Transcription factor activity, sequence-specific DNA binding	OE9A009930 OE9A016967 OE9A033879 OE9A038581 OE9A073161 OE9A073838 OE9A114387
	0.036	3	198	8.4	GO:0005507 Copper ion binding	OE9A010597 OE9A064167 OE9A106252
	0.038	2	65	17.1	GO:0050790 Reg. of catalytic activity	OE9A043535 OE9A047382
	0.049	1	5	111.5	GO:0016024 CDP-diacylglycerol biosynthetic process	OE9A052403
