# Supplementary material for: Comparative transcriptomics of biopesticide-treated olives subjected to Xylella infection
Source: Research Square preprint supplement (doi:10.21203/rs.3.rs-8603179/v1), 2026-01-29
Supplement: Supplementary file 12 [file b9b112b66e1d09fef07bf6d3.xlsx]

## Sheet: UP FC>2
List of Differential Expressed Genes (DEGs) FC >2 in T6_Onion_Infect_
ID	baseMean	log2FoldChange	lfcSE	stat	pvalue	padj	id gene	Description
OE9A012996	18.9264175709949	7.66298	2.16714	3.53598	0.000406258	0.0299363	OE9A012996	ID=OE9A012996T1;Parent=OE9A012996;Name=OE9A012996T1;product=OE9A012996P1;Description=transcription factor CYCLOIDEA-like;Ontology_term=GO:2000024
OE9A102799	10.5466	5.99507	1.42759	4.19944	2.67579e-05	0.0037498	OE9A102799	ID=OE9A102799T1;Parent=OE9A102799;Name=OE9A102799T1;product=OE9A102799P1;Description=dehydration-responsive element-binding 3-like;Ontology_term=GO:0003677%2C GO:0003700%2C GO:0005634%2C GO:0005667%2C GO:0006355%2C GO:0045449
OE9A078487	3.84537	5.84918	1.75717	3.32876	0.00087234	0.0493248	OE9A078487	ID=OE9A078487T1;Parent=OE9A078487;Name=OE9A078487T1;product=OE9A078487P1;Description=transcription factor RAX2-like;Ontology_term=GO:0003677
OE9A024819	6.66384	5.76236	1.67751	3.43507	0.000592408	0.0383756	OE9A024819	ID=OE9A024819T1;Parent=OE9A024819;Name=OE9A024819T1;product=OE9A024819P1;Description=PHYTOCHROME KINASE SUBSTRATE 3-like;Ontology_term=GO:0016020
OE9A082602	7.23159	5.61425	1.56409	3.58946	0.000331359	0.0259467	OE9A082602	ID=OE9A082602T5;Parent=OE9A082602;Name=OE9A082602T5;product=OE9A082602P4;Description=ADP-ribosylation factor GTPase-activating AGD3-like isoform X1;Ontology_term=GO:0005096%2C GO:0005515%2C GO:0005737%2C GO:0043547
OE9A061011	6.48773	5.55459	1.58927	3.49505	0.000473966	0.0334343	OE9A061011	ID=OE9A061011T1;Parent=OE9A061011;Name=OE9A061011T1;product=OE9A061011P1;Description=nucleolar 10;Ontology_term=GO:0005515%2C GO:0005730%2C GO:0009561
OE9A029151	5.5201	5.51542	1.56011	3.53528	0.000407347	0.0299462	OE9A029151	ID=OE9A029151T1;Parent=OE9A029151;Name=OE9A029151T1;product=OE9A029151P1
OE9A048039	8.02598	5.5011	1.6583	3.31731	0.000908885	0.0504078	OE9A048039	ID=OE9A048039T1;Parent=OE9A048039;Name=OE9A048039T1;product=OE9A048039P1;Description=transcription factor RAX2-like;Ontology_term=GO:0003677
OE9A081378	3.58589	5.2995	1.72152	3.07838	0.00208128	0.0867643	OE9A081378	ID=OE9A081378T3;Parent=OE9A081378;Name=OE9A081378T3;product=OE9A081378P3;Description=uncharacterized protein LOC111394488 isoform X1;Ontology_term=GO:0005488
OE9A073630	3.65782	5.19234	1.62512	3.19506	0.00139804	0.0671036	OE9A073630	ID=OE9A073630T1;Parent=OE9A073630;Name=OE9A073630T1;product=OE9A073630P1
OE9A115982	6.90584	5.04113	1.45399	3.46711	0.00052609	0.0357457	OE9A115982	ID=OE9A115982T1;Parent=OE9A115982;Name=OE9A115982T1;product=OE9A115982P1;Description=involved in transcript turnover and stability;Ontology_term=GO:0008270%2C GO:0016021
OE9A021413	4.98247	5.0242	1.60894	3.12269	0.00179208	0.0785689	OE9A021413	ID=OE9A021413T1;Parent=OE9A021413;Name=OE9A021413T1;product=OE9A021413P1
OE9A083108	5.23889	4.9867	1.53134	3.25643	0.00112821	0.0597228	OE9A083108	ID=OE9A083108T1;Parent=OE9A083108;Name=OE9A083108T1;product=OE9A083108P1;Description=cannabidiolic acid synthase-like;Ontology_term=GO:0016614%2C GO:0050660%2C GO:0055114
OE9A076634	5.00193	4.95283	1.55203	3.19119	0.0014169	0.0674929	OE9A076634	ID=OE9A076634T1;Parent=OE9A076634;Name=OE9A076634T1;product=OE9A076634P1;md5=15e867024b95ecf2d5ccd0317096c47d;INTERPRO=<table><tr><th>DB</th><th>ID</th><th>Description</th></tr><tr><td>Gene3D</td><td>G3DSA:3.80.10.10</td><td></td></tr><tr><td>PANTHER</td><td>PTHR23155</td><td></td></tr><tr><td>PANTHER</td><td>PTHR23155:SF543</td><td></td></tr><tr><td>PRINTS</td><td>PR00364</td><td>Disease resista…
OE9A115485	9.62744	4.8246	1.51895	3.17627	0.00149184	0.0697919	OE9A115485	ID=OE9A115485T1;Parent=OE9A115485;Name=OE9A115485T1;product=OE9A115485P1;Description=probably inactive leucine-rich repeat receptor kinase At5g06940;Ontology_term=GO:0004672%2C GO:0005515%2C GO:0005524%2C GO:0006468%2C GO:0016021
OE9A058243	5.92946	4.74984	1.44282	3.29205	0.000994612	0.0541107	OE9A058243	ID=OE9A058243T1;Parent=OE9A058243;Name=OE9A058243T1;product=OE9A058243P1;Description=ATP-dependent Clp protease ATP-binding subunit homolog CD4B, chloroplastic-like;Ontology_term=GO:0000166%2C GO:0019538
OE9A119479	4.60066	4.57457	1.36917	3.34112	0.000834413	0.0480607	OE9A119479	ID=OE9A119479T1;Parent=OE9A119479;Name=OE9A119479T1;product=OE9A119479P1;Description=nuclease HARBI1;Ontology_term=GO:0016021
OE9A107275	7.14391	4.53201	1.34444	3.37092	0.000749176	0.0442056	OE9A107275	ID=OE9A107275T1;Parent=OE9A107275;Name=OE9A107275T1;product=OE9A107275P1;Description=Leucine-rich repeat, typical subtype;Ontology_term=GO:0005515
OE9A085328	5.19577	4.37809	1.41677	3.09019	0.00200026	0.0846227	OE9A085328	ID=OE9A085328T1;Parent=OE9A085328;Name=OE9A085328T1;product=OE9A085328P1;Description=probable methyltransferase PMT2;Ontology_term=GO:0008168%2C GO:0016021%2C GO:0032259
OE9A056425	5.43764	4.35095	1.38347	3.14495	0.00166118	0.074388	OE9A056425	ID=OE9A056425T1;Parent=OE9A056425;Name=OE9A056425T1;product=OE9A056425P1;Description=probable phosphatase 2C 34 isoform X1;Ontology_term=GO:0004722%2C GO:0006470%2C GO:0008287
OE9A025132	5.74675	3.802	1.17049	3.24821	0.00116134	0.0606896	OE9A025132	ID=OE9A025132T1;Parent=OE9A025132;Name=OE9A025132T1;product=OE9A025132P1;Description=ketol-acid reductoisomerase, chloroplastic-like;Ontology_term=GO:0004455%2C GO:0005507%2C GO:0005618%2C GO:0005739%2C GO:0009097%2C GO:0009098%2C GO:0009099%2C GO:0009570%2C GO:0009941%2C GO:0015940%2C GO:0048046%2C GO:0055114
OE9A039170	10.8577	3.7303	0.994581	3.75062	0.000176397	0.0166785	OE9A039170	ID=OE9A039170T1;Parent=OE9A039170;Name=OE9A039170T1;product=OE9A039170P1;Description=DETOXIFICATION 49-like;Ontology_term=GO:0006855%2C GO:0015238%2C GO:0015297%2C GO:0016021
OE9A023547	4.86842	3.57322	1.15491	3.09393	0.00197525	0.0840177	OE9A023547	ID=OE9A023547T1;Parent=OE9A023547;Name=OE9A023547T1;product=OE9A023547P1;Description=cytochrome P450 CYP72A219-like;Ontology_term=GO:0004497%2C GO:0005506%2C GO:0016021%2C GO:0016705%2C GO:0020037%2C GO:0055114
OE9A101606	6.76794	3.50841	1.11553	3.14507	0.00166048	0.074388	OE9A101606	ID=OE9A101606T1;Parent=OE9A101606;Name=OE9A101606T1;product=OE9A101606P1;Description=S-adenosyl-L-methionine-dependent methyltransferase;Ontology_term=GO:0016020
OE9A050767	8.3801	3.43354	1.07936	3.18108	0.00146729	0.0690553	OE9A050767	ID=OE9A050767T1;Parent=OE9A050767;Name=OE9A050767T1;product=OE9A050767P1
OE9A078689	10.1726	3.31999	0.997169	3.32942	0.000870285	0.0493125	OE9A078689	ID=OE9A078689T1;Parent=OE9A078689;Name=OE9A078689T1;product=OE9A078689P1
OE9A019882	8.01472	3.26229	1.00629	3.24191	0.00118732	0.0619122	OE9A019882	ID=OE9A019882T1;Parent=OE9A019882;Name=OE9A019882T1;product=OE9A019882P1
OE9A061095	12.0664	3.22977	0.696786	4.63524	3.56518e-06	0.000746097	OE9A061095	ID=OE9A061095T1;Parent=OE9A061095;Name=OE9A061095T1;product=OE9A061095P1;Description=NAC domain-containing 62-like;Ontology_term=GO:0003677%2C GO:0006355
OE9A097757	18.3639	3.14418	0.778697	4.03775	5.39667e-05	0.0065917	OE9A097757	ID=OE9A097757T1;Parent=OE9A097757;Name=OE9A097757T1;product=OE9A097757P1
OE9A083942	47.3596	3.10757	0.504228	6.16303	7.13639e-10	6.22273e-07	OE9A083942	ID=OE9A083942T1;Parent=OE9A083942;Name=OE9A083942T1;product=OE9A083942P1;Description=ALA-interacting subunit 1-like;Ontology_term=GO:0016021
OE9A076184	64.2582	3.06808	0.570965	5.3735	7.72218e-08	3.61801e-05	OE9A076184	ID=OE9A076184T1;Parent=OE9A076184;Name=OE9A076184T1;product=OE9A076184P1;Description=ethylene-responsive transcription factor ERF017-like;Ontology_term=GO:0003677%2C GO:0003700%2C GO:0005667%2C GO:0006355%2C GO:0045449
OE9A042006	27.1869	3.03908	0.78643	3.8644	0.000111365	0.0116528	OE9A042006	ID=OE9A042006T1;Parent=OE9A042006;Name=OE9A042006T1;product=OE9A042006P1;Description=probable WRKY transcription factor 53;Ontology_term=GO:0003700%2C GO:0005667%2C GO:0006355%2C GO:0043565%2C GO:0045449
OE9A114387	146.492	3.03365	0.567226	5.34822	8.88225e-08	3.87254e-05	OE9A114387	ID=OE9A114387T1;Parent=OE9A114387;Name=OE9A114387T1;product=OE9A114387P1;Description=C-repeat dehydration-responsive element-binding factor 4;Ontology_term=GO:0003677%2C GO:0003700%2C GO:0005634%2C GO:0005667%2C GO:0006355%2C GO:0045449
OE9A012995	11.1178	2.95262	0.911455	3.23945	0.00119758	0.0622407	OE9A012995	ID=OE9A012995T1;Parent=OE9A012995;Name=OE9A012995T1;product=OE9A012995P1
OE9A115510	6.38647	2.88566	0.943268	3.05921	0.00221919	0.0909433	OE9A115510	ID=OE9A115510T1;Parent=OE9A115510;Name=OE9A115510T1;product=OE9A115510P1;Description=probable galactinol--sucrose galactosyltransferase 6;Ontology_term=GO:0003824
OE9A051038	6.91809	2.87699	0.890344	3.23132	0.00123218	0.0629935	OE9A051038	ID=OE9A051038T1;Parent=OE9A051038;Name=OE9A051038T1;product=OE9A051038P1;Description=tRNA pseudouridine synthase isoform X1;Ontology_term=GO:0001522%2C GO:0003723%2C GO:0009982
OE9A013976	8.09876	2.86642	0.840471	3.41049	0.000648454	0.0405636	OE9A013976	ID=OE9A013976T1;Parent=OE9A013976;Name=OE9A013976T1;product=OE9A013976P1
OE9A014582	257.974	2.8608	0.300146	9.53138	1.55202e-21	4.87193e-17	OE9A014582	ID=OE9A014582T1;Parent=OE9A014582;Name=OE9A014582T1;product=OE9A014582P1
OE9A026649	52.243	2.85258	0.426376	6.69029	2.22733e-11	3.4959e-08	OE9A026649	ID=OE9A026649T1;Parent=OE9A026649;Name=OE9A026649T1;product=OE9A026649P1;Description=UDP-galactose UDP-glucose transporter 2-like;Ontology_term=GO:0008643%2C GO:0030173%2C GO:0030176%2C GO:0046964%2C GO:1902559
OE9A110881	6.47155	2.83436	0.869158	3.26104	0.00111003	0.0593611	OE9A110881	ID=OE9A110881T1;Parent=OE9A110881;Name=OE9A110881T1;product=OE9A110881P1;Description=ferredoxin-dependent glutamate synthase, chloroplastic;Ontology_term=GO:0005737%2C GO:0006537%2C GO:0015930%2C GO:0019676%2C GO:0055114
OE9A080031	16.2896	2.82758	0.894504	3.16106	0.00157194	0.0719928	OE9A080031	ID=OE9A080031T1;Parent=OE9A080031;Name=OE9A080031T1;product=OE9A080031P1;Description=phospholipase D alpha 1;Ontology_term=GO:0004630%2C GO:0005509%2C GO:0005515%2C GO:0005773%2C GO:0005783%2C GO:0005886%2C GO:0009395%2C GO:0009536%2C GO:0046470%2C GO:0070290
OE9A115995	33.7215	2.7859	0.625892	4.45108	8.54387e-06	0.00153258	OE9A115995	ID=OE9A115995T1;Parent=OE9A115995;Name=OE9A115995T1;product=OE9A115995P1;Description=acyltransferase At1g54570, chloroplastic isoform X1;Ontology_term=GO:0004144%2C GO:0010287%2C GO:0033306%2C GO:0042967%2C GO:0046486
OE9A056977	17.6937	2.78465	0.646765	4.30551	1.66601e-05	0.00262803	OE9A056977	ID=OE9A056977T1;Parent=OE9A056977;Name=OE9A056977T1;product=OE9A056977P1;Description=nudix hydrolase 19, chloroplastic;Ontology_term=GO:0005829%2C GO:0009507%2C GO:0016787%2C GO:0046872
OE9A080831	12.4905	2.75017	0.783967	3.50802	0.000451454	0.0323553	OE9A080831	ID=OE9A080831T1;Parent=OE9A080831;Name=OE9A080831T1;product=OE9A080831P1
OE9A025096	12.6245	2.73531	0.720102	3.79851	0.000145571	0.0145995	OE9A025096	ID=OE9A025096T1;Parent=OE9A025096;Name=OE9A025096T1;product=OE9A025096P1;Description=heterogeneous nuclear ribonucleo 1-like;Ontology_term=GO:0000166%2C GO:0003676
OE9A093828	15.0186	2.73214	0.789366	3.46118	0.000537815	0.0363213	OE9A093828	ID=OE9A093828T1;Parent=OE9A093828;Name=OE9A093828T1;product=OE9A093828P1;Description=plastidial lipoyltransferase 2;Ontology_term=GO:0005737%2C GO:0006464%2C GO:0009107%2C GO:0016415%2C GO:0042967
OE9A050716	12.7662	2.6953	0.782742	3.44341	0.000574428	0.0379229	OE9A050716	ID=OE9A050716T1;Parent=OE9A050716;Name=OE9A050716T1;product=OE9A050716P1;md5=cb85e09455a1b5bcdf60abb476e08beb;INTERPRO=<table><tr><th>DB</th><th>ID</th><th>Description</th></tr><tr><td>PANTHER</td><td>PTHR14493</td><td></td></tr><tr><td>PANTHER</td><td>PTHR14493:SF53</td><td></td></tr></table>;Description=Zinc finger CCCH domain-containing protein 2
OE9A036280	64.7963	2.68776	0.397352	6.76419	1.3406e-11	2.33794e-08	OE9A036280	ID=OE9A036280T1;Parent=OE9A036280;Name=OE9A036280T1;product=OE9A036280P1;Description=late embryogenesis abundant At1g64065-like;Ontology_term=GO:0016020
OE9A021126	123.827	2.67658	0.313088	8.54898	1.24176e-17	1.29934e-13	OE9A021126	ID=OE9A021126T1;Parent=OE9A021126;Name=OE9A021126T1;product=OE9A021126P1;Description=calcium-dependent kinase SK5-like;Ontology_term=GO:0004683%2C GO:0005509%2C GO:0005516%2C GO:0005524%2C GO:0005634%2C GO:0005737%2C GO:0005886%2C GO:0009069%2C GO:0009738%2C GO:0009931%2C GO:0018105%2C GO:0035556%2C GO:0046777
OE9A048783	9.61802	2.65161	0.821091	3.22937	0.00124062	0.0629935	OE9A048783	ID=OE9A048783T1;Parent=OE9A048783;Name=OE9A048783T1;product=OE9A048783P1;Description=diacylglycerol kinase 2;Ontology_term=GO:0004143%2C GO:0005524%2C GO:0005622%2C GO:0007205%2C GO:0009395%2C GO:0016021%2C GO:0016310%2C GO:0035556%2C GO:0046486%2C GO:0048364%2C GO:0048366
OE9A041775	1319.7	2.56322	0.34577	7.41307	1.23407e-13	3.87388e-10	OE9A041775	ID=OE9A041775T1;Parent=OE9A041775;Name=OE9A041775T1;product=OE9A041775P1;Description=oxalate-- ligase-like;Ontology_term=GO:0009506%2C GO:0009570%2C GO:0009735%2C GO:0009805%2C GO:0009809%2C GO:0009811%2C GO:0010030%2C GO:0010214%2C GO:0016207%2C GO:0033611%2C GO:0046487%2C GO:0048046%2C GO:0050203%2C GO:0050832
OE9A015473	299.572	2.55314	0.438717	5.81957	5.89988e-09	3.70406e-06	OE9A015473	ID=OE9A015473T1;Parent=OE9A015473;Name=OE9A015473T1;product=OE9A015473P1
OE9A048783	208.104	2.52454	0.363073	6.95324	3.57001e-12	8.00473e-09	OE9A048783	ID=OE9A048783T1;Parent=OE9A048783;Name=OE9A048783T1;product=OE9A048783P1;Description=diacylglycerol kinase 2;Ontology_term=GO:0004143%2C GO:0005524%2C GO:0005622%2C GO:0007205%2C GO:0009395%2C GO:0016021%2C GO:0016310%2C GO:0035556%2C GO:0046486%2C GO:0048364%2C GO:0048366
OE9A097757	707.524	2.50887	0.369076	6.79771	1.06295e-11	1.96276e-08	OE9A097757	ID=OE9A097757T1;Parent=OE9A097757;Name=OE9A097757T1;product=OE9A097757P1
OE9A081639	19.9976	2.47367	0.601201	4.11455	3.87935e-05	0.00507403	OE9A081639	ID=OE9A081639T1;Parent=OE9A081639;Name=OE9A081639T1;product=OE9A081639P1
OE9A028561	15.0144	2.46255	0.778523	3.1631	0.00156096	0.0717427	OE9A028561	ID=OE9A028561T1;Parent=OE9A028561;Name=OE9A028561T1;product=OE9A028561P1;Description=mitogen-activated kinase kinase kinase YODA-like;Ontology_term=GO:0004672%2C GO:0005524%2C GO:0006468
OE9A057570	20.4365	2.40307	0.735036	3.26932	0.00107805	0.0582461	OE9A057570	ID=OE9A057570T1;Parent=OE9A057570;Name=OE9A057570T1;product=OE9A057570P1
OE9A091730	16.8176	2.38819	0.723738	3.2998	0.000967549	0.0528214	OE9A091730	ID=OE9A091730T1;Parent=OE9A091730;Name=OE9A091730T1;product=OE9A091730P1;Description=lob domain-containing 18;Ontology_term=GO:0048856
OE9A076786	459.522	2.38746	0.489265	4.87968	1.06258e-06	0.000285091	OE9A076786	ID=OE9A076786T1;Parent=OE9A076786;Name=OE9A076786T1;product=OE9A076786P1
OE9A087932	86.9584	2.38543	0.470139	5.07389	3.89762e-07	0.00012879	OE9A087932	ID=OE9A087932T1;Parent=OE9A087932;Name=OE9A087932T1;product=OE9A087932P1;Description=verticillium wilt disease resistance;Ontology_term=GO:0005515%2C GO:0016020
OE9A052108	5996.87	2.37769	0.364677	6.51999	7.03121e-11	8.82867e-08	OE9A052108	ID=OE9A052108T1;Parent=OE9A052108;Name=OE9A052108T1;product=OE9A052108P1
OE9A007593	130.104	2.37533	0.375766	6.32132	2.59342e-10	2.80724e-07	OE9A007593	ID=OE9A007593T1;Parent=OE9A007593;Name=OE9A007593T1;product=OE9A007593P1
OE9A063873	11.4008	2.36807	0.736371	3.21587	0.0013005	0.0649028	OE9A063873	ID=OE9A063873T1;Parent=OE9A063873;Name=OE9A063873T1;product=OE9A063873P1;Description=probable fructokinase-6, chloroplastic;Ontology_term=GO:0004747%2C GO:0006014%2C GO:0006098%2C GO:0046835
OE9A063937	21.02	2.3588	0.612883	3.8487	0.000118749	0.0123432	OE9A063937	ID=OE9A063937T1;Parent=OE9A063937;Name=OE9A063937T1;product=OE9A063937P1;Description=myosin-6 isoform X1;Ontology_term=GO:0003774%2C GO:0003779%2C GO:0005524%2C GO:0016459
OE9A118926	12.4672	2.35424	0.776938	3.03015	0.00244435	0.0967599	OE9A118926	ID=OE9A118926T1;Parent=OE9A118926;Name=OE9A118926T1;product=OE9A118926P1;Description=DEAD-box ATP-dependent RNA helicase 29;Ontology_term=GO:0003723%2C GO:0004004%2C GO:0005524%2C GO:0005634%2C GO:0010501
OE9A043040	10623.8	2.34964	0.359378	6.53806	6.23211e-11	8.15134e-08	OE9A043040	ID=OE9A043040T1;Parent=OE9A043040;Name=OE9A043040T1;product=OE9A043040P1;Description=zinc finger CCCH domain-containing 29-like;Ontology_term=GO:0005515%2C GO:0046872
OE9A006386	5478.76	2.34342	0.365202	6.41678	1.39182e-10	1.61818e-07	OE9A006386	ID=OE9A006386T1;Parent=OE9A006386;Name=OE9A006386T1;product=OE9A006386P1;Description=zinc finger CCCH domain-containing 29-like;Ontology_term=GO:0005515%2C GO:0046872
OE9A092877	29.186	2.31869	0.587617	3.94591	7.94967e-05	0.00897655	OE9A092877	ID=OE9A092877T1;Parent=OE9A092877;Name=OE9A092877T1;product=OE9A092877P1;Description=probable phosphatase 2C 73;Ontology_term=GO:0004722%2C GO:0006470%2C GO:0008287
OE9A095315	19.7195	2.29699	0.652692	3.51926	0.000432756	0.031301	OE9A095315	ID=OE9A095315T1;Parent=OE9A095315;Name=OE9A095315T1;product=OE9A095315P1;Description=ABC transporter I family member 6, chloroplastic;Ontology_term=GO:0005524%2C GO:0009570%2C GO:0009793%2C GO:0010027%2C GO:0042626%2C GO:0055085
OE9A041553	462.253	2.2774	0.311964	7.30022	2.87297e-13	8.19866e-10	OE9A041553	ID=OE9A041553T1;Parent=OE9A041553;Name=OE9A041553T1;product=OE9A041553P1;Description=two-component response regulator ARR5-like;Ontology_term=GO:0000160%2C GO:0005622
OE9A105389	25.3836	2.27299	0.550409	4.12964	3.63332e-05	0.00479216	OE9A105389	ID=OE9A105389T1;Parent=OE9A105389;Name=OE9A105389T1;product=OE9A105389P1;Description=probable LRR receptor-like serine threonine- kinase At2g16250;Ontology_term=GO:0004672%2C GO:0005524%2C GO:0006468%2C GO:0016021
OE9A001198	462.508	2.27293	0.346227	6.56485	5.20852e-11	7.10872e-08	OE9A001198	ID=OE9A001198T1;Parent=OE9A001198;Name=OE9A001198T1;product=OE9A001198P1;Description=beta-amylase 3, chloroplastic;Ontology_term=GO:0000272%2C GO:0005982%2C GO:0005985%2C GO:0016161
OE9A095768	4904.69	2.26212	0.441291	5.12613	2.95755e-07	0.000102022	OE9A095768	ID=OE9A095768T1;Parent=OE9A095768;Name=OE9A095768T1;product=OE9A095768P1;Description=mitochondrial uncoupling 5-like;Ontology_term=GO:0003735%2C GO:0005840%2C GO:0006412%2C GO:0006839%2C GO:0016021%2C GO:0031966%2C GO:0042254%2C GO:0055085
OE9A033158	336.176	2.25972	0.433451	5.21332	1.85487e-07	6.7705e-05	OE9A033158	ID=OE9A033158T1;Parent=OE9A033158;Name=OE9A033158T1;product=OE9A033158P1
OE9A117817	21.9802	2.25715	0.550716	4.09857	4.15709e-05	0.00534816	OE9A117817	ID=OE9A117817T1;Parent=OE9A117817;Name=OE9A117817T1;product=OE9A117817P1
OE9A002067	935.451	2.25553	0.392896	5.74079	9.42339e-09	5.47796e-06	OE9A002067	ID=OE9A002067T1;Parent=OE9A002067;Name=OE9A002067T1;product=OE9A002067P1;Description=calcium-binding PBP1-like;Ontology_term=GO:0005509
OE9A038510	89.4533	2.25214	0.487808	4.61686	3.89586e-06	0.000788962	OE9A038510	ID=OE9A038510T1;Parent=OE9A038510;Name=OE9A038510T1;product=OE9A038510P1;Description=allene oxide synthase 1, chloroplastic-like;Ontology_term=GO:0004497%2C GO:0005506%2C GO:0016705%2C GO:0020037%2C GO:0047987%2C GO:0055114
OE9A104327	867.388	2.2496	0.372926	6.0323	1.61642e-09	1.23759e-06	OE9A104327	ID=OE9A104327T1;Parent=OE9A104327;Name=OE9A104327T1;product=OE9A104327P1;Description=uncharacterized protein LOC105179443;Ontology_term=GO:0016021
OE9A006607	12.7564	2.23715	0.722239	3.09752	0.00195148	0.083459	OE9A006607	ID=OE9A006607T1;Parent=OE9A006607;Name=OE9A006607T1;product=OE9A006607P1;Description=uncharacterized protein LOC111395495;Ontology_term=GO:0016021
OE9A019254	691.353	2.22326	0.456053	4.875	1.08808e-06	0.000289456	OE9A019254	ID=OE9A019254T1;Parent=OE9A019254;Name=OE9A019254T1;product=OE9A019254P1;Description=BON1-associated 2-like;Ontology_term=GO:0005515
OE9A077952	47.7055	2.21472	0.588185	3.76535	0.000166319	0.016214	OE9A077952	ID=OE9A077952T1;Parent=OE9A077952;Name=OE9A077952T1;product=OE9A077952P1;Description=ACD11 homolog;Ontology_term=GO:0005634%2C GO:0005737%2C GO:0017089%2C GO:0046836%2C GO:0051861
OE9A002793	28.2023	2.21395	0.502731	4.40385	1.06347e-05	0.00181432	OE9A002793	ID=OE9A002793T1;Parent=OE9A002793;Name=OE9A002793T1;product=OE9A002793P1;Description=calmodulin-binding 60 A-like isoform X1;Ontology_term=GO:0005516%2C GO:0006950
OE9A109149	127.746	2.2061	0.587519	3.75495	0.000173378	0.016593	OE9A109149	ID=OE9A109149T1;Parent=OE9A109149;Name=OE9A109149T1;product=OE9A109149P1;Description=disease resistance RPM1-like;Ontology_term=GO:0043531
OE9A072543	31.4426	2.19671	0.685057	3.20661	0.00134308	0.0656292	OE9A072543	ID=OE9A072543T1;Parent=OE9A072543;Name=OE9A072543T1;product=OE9A072543P1;Description=receptor-like serine threonine- kinase SD1-8 isoform X1;Ontology_term=GO:0004672%2C GO:0005524%2C GO:0006468%2C GO:0048544
OE9A069420	14365.6	2.19534	0.367777	5.96921	2.38398e-09	1.7818e-06	OE9A069420	ID=OE9A069420T1;Parent=OE9A069420;Name=OE9A069420T1;product=OE9A069420P1;Description=zinc finger CCCH domain-containing 29-like;Ontology_term=GO:0005515%2C GO:0046872
OE9A097645	1873.2	2.18263	0.346655	6.29628	3.04882e-10	3.19018e-07	OE9A097645	ID=OE9A097645T1;Parent=OE9A097645;Name=OE9A097645T1;product=OE9A097645P1;Description=probable WRKY transcription factor 33;Ontology_term=GO:0003700%2C GO:0005667%2C GO:0006355%2C GO:0043565%2C GO:0045449
OE9A008243	76.0708	2.17694	0.419965	5.18362	2.17617e-07	7.76273e-05	OE9A008243	ID=OE9A008243T1;Parent=OE9A008243;Name=OE9A008243T1;product=OE9A008243P1;Description=probable phosphatase 2C 25;Ontology_term=GO:0004721%2C GO:0006470%2C GO:0043169%2C GO:0044763
OE9A016847	1794.6	2.17234	0.44056	4.93086	8.18668e-07	0.000233625	OE9A016847	ID=OE9A016847T1;Parent=OE9A016847;Name=OE9A016847T1;product=OE9A016847P1
OE9A105581	306.741	2.17168	0.39118	5.55161	2.83053e-08	1.53195e-05	OE9A105581	ID=OE9A105581T1;Parent=OE9A105581;Name=OE9A105581T1;product=OE9A105581P1;Description=dehydration-responsive element-binding 1E-like;Ontology_term=GO:0003677%2C GO:0003700%2C GO:0005634%2C GO:0005667%2C GO:0006355%2C GO:0045449
OE9A076025	102.269	2.16824	0.358315	6.05121	1.4376e-09	1.12819e-06	OE9A076025	ID=OE9A076025T1;Parent=OE9A076025;Name=OE9A076025T1;product=OE9A076025P1
OE9A006737	711.604	2.16325	0.369476	5.85491	4.77267e-09	3.12123e-06	OE9A006737	ID=OE9A006737T1;Parent=OE9A006737;Name=OE9A006737T1;product=OE9A006737P1;Description=serine threonine- kinase CCR4;Ontology_term=GO:0004672%2C GO:0005524%2C GO:0006468%2C GO:0016020
OE9A090698	7832.35	2.15574	0.407321	5.29248	1.20671e-07	4.7949e-05	OE9A090698	ID=OE9A090698T1;Parent=OE9A090698;Name=OE9A090698T1;product=OE9A090698P1;Description=mitochondrial uncoupling 5-like;Ontology_term=GO:0003735%2C GO:0005840%2C GO:0006412%2C GO:0006839%2C GO:0016021%2C GO:0031966%2C GO:0042254
OE9A079911	872.18	2.15323	0.610394	3.52761	0.000419327	0.0306427	OE9A079911	ID=OE9A079911T1;Parent=OE9A079911;Name=OE9A079911T1;product=OE9A079911P1;Description=ethylene-responsive transcription factor ERF109-like;Ontology_term=GO:0003677%2C GO:0003700%2C GO:0005667%2C GO:0006355%2C GO:0045449
OE9A094040	40.2804	2.14658	0.593466	3.61702	0.000298016	0.0244896	OE9A094040	ID=OE9A094040T1;Parent=OE9A094040;Name=OE9A094040T1;product=OE9A094040P1;Description=lob domain-containing 18;Ontology_term=GO:0048856
OE9A028936	161.568	2.13529	0.381607	5.59553	2.19949e-08	1.23293e-05	OE9A028936	ID=OE9A028936T1;Parent=OE9A028936;Name=OE9A028936T1;product=OE9A028936P1;Description=oxalate-- ligase-like;Ontology_term=GO:0009805%2C GO:0009809%2C GO:0009811%2C GO:0016207
OE9A073332	18.2942	2.1155	0.628556	3.36564	0.000763654	0.0448072	OE9A073332	ID=OE9A073332T1;Parent=OE9A073332;Name=OE9A073332T1;product=OE9A073332P1;Description=probable phosphatase 2C 40;Ontology_term=GO:0003824
OE9A089731	464.046	2.10212	0.325865	6.4509	1.11189e-10	1.34244e-07	OE9A089731	ID=OE9A089731T1;Parent=OE9A089731;Name=OE9A089731T1;product=OE9A089731P1;Description=scarecrow 21;Ontology_term=GO:0006355
OE9A056651	1454.85	2.0957	0.336004	6.23713	4.45684e-10	4.28125e-07	OE9A056651	ID=OE9A056651T1;Parent=OE9A056651;Name=OE9A056651T1;product=OE9A056651P1;Description=probable WRKY transcription factor 33;Ontology_term=GO:0003700%2C GO:0005667%2C GO:0006355%2C GO:0043565%2C GO:0045449
OE9A023170	20.8256	2.08458	0.673317	3.09599	0.0019616	0.0836908	OE9A023170	ID=OE9A023170T1;Parent=OE9A023170;Name=OE9A023170T1;product=OE9A023170P1;Description=Serine threonine kinase;Ontology_term=GO:0004674%2C GO:0005524%2C GO:0005886%2C GO:0006468%2C GO:0009069
OE9A033630	2209.97	2.08178	0.405668	5.13174	2.87075e-07	0.000100129	OE9A033630	ID=OE9A033630T1;Parent=OE9A033630;Name=OE9A033630T1;product=OE9A033630P1;Description=probable galacturonosyltransferase-like 9;Ontology_term=GO:0016757
OE9A081779	17.9786	2.07958	0.614082	3.38649	0.000707939	0.0425727	OE9A081779	ID=OE9A081779T1;Parent=OE9A081779;Name=OE9A081779T1;product=OE9A081779P1;Description=TRIGALACTOSYLDIACYLGLYCEROL 4, chloroplastic;Ontology_term=GO:0005488%2C GO:0006869%2C GO:0009941%2C GO:0016020
OE9A049811	1373.15	2.06555	0.438234	4.71335	2.43683e-06	0.000546389	OE9A049811	ID=OE9A049811T1;Parent=OE9A049811;Name=OE9A049811T1;product=OE9A049811P1;Description=zinc finger ZAT10-like;Ontology_term=GO:0046872
OE9A043605	3534.02	2.06488	0.267387	7.72245	1.14111e-14	5.97012e-11	OE9A043605	ID=OE9A043605T1;Parent=OE9A043605;Name=OE9A043605T1;product=OE9A043605P1;Description=probable WRKY transcription factor 33;Ontology_term=GO:0003700%2C GO:0005667%2C GO:0006355%2C GO:0043565%2C GO:0045449
OE9A028341	673.545	2.06089	0.48495	4.2497	2.14059e-05	0.00316959	OE9A028341	ID=OE9A028341T1;Parent=OE9A028341;Name=OE9A028341T1;product=OE9A028341P1;Description=C-repeat dehydration-responsive element-binding factor 4;Ontology_term=GO:0003677%2C GO:0003700%2C GO:0005634%2C GO:0005667%2C GO:0006355%2C GO:0045449
OE9A000299	2662.81	2.05714	0.408054	5.04135	4.62263e-07	0.000149597	OE9A000299	ID=OE9A000299T1;Parent=OE9A000299;Name=OE9A000299T1;product=OE9A000299P1;Description=dehydration-responsive element-binding 1A;Ontology_term=GO:0003677%2C GO:0003700%2C GO:0005634%2C GO:0005667%2C GO:0006355%2C GO:0045449
OE9A103792	608.093	2.05482	0.322777	6.36606	1.93942e-10	2.17429e-07	OE9A103792	ID=OE9A103792T1;Parent=OE9A103792;Name=OE9A103792T1;product=OE9A103792P1
OE9A017022	42.8874	2.04653	0.674284	3.03512	0.00240437	0.0961471	OE9A017022	ID=OE9A017022T1;Parent=OE9A017022;Name=OE9A017022T1;product=OE9A017022P1;Description=glycerophosphodiester phosphodiesterase GDPDL3-like;Ontology_term=GO:0006071%2C GO:0008889%2C GO:0009395%2C GO:0016021%2C GO:0046486
OE9A057477	17.8679	2.0212	0.660152	3.06172	0.00220072	0.0904226	OE9A057477	ID=OE9A057477T1;Parent=OE9A057477;Name=OE9A057477T1;product=OE9A057477P1;Description=type IV inositol polyphosphate 5-phosphatase 3-like isoform X1;Ontology_term=GO:0016787%2C GO:0046856
OE9A014390	531.827	2.00693	0.327799	6.12243	9.21577e-10	7.81871e-07	OE9A014390	ID=OE9A014390T1;Parent=OE9A014390;Name=OE9A014390T1;product=OE9A014390P1;Description=RING-H2 finger ATL60-like;Ontology_term=GO:0005515%2C GO:0008270%2C GO:0044267
OE9A106917	15.6619	2.00136	0.662742	3.01982	0.00252923	0.0985052	OE9A106917	ID=OE9A106917T1;Parent=OE9A106917;Name=OE9A106917T1;product=OE9A106917P1
OE9A012294	143.781	2.0001	0.470363	4.25226	2.11628e-05	0.00316597	OE9A012294	ID=OE9A012294T1;Parent=OE9A012294;Name=OE9A012294T1;product=OE9A012294P1;Description=allene oxide synthase 1, chloroplastic-like;Ontology_term=GO:0004497%2C GO:0005506%2C GO:0016705%2C GO:0020037%2C GO:0055114

## Sheet: ShinyGO UP FC>2 
	Enrichment FDR	nGenes	Pathway Genes	Fold Enrichment	Pathways (click for details)	Genes
	0.00084	2	3	340.9	GO:0033611 Oxalate catabolic process	OE9A028936 OE9A041775
	0.00084	2	3	340.9	GO:0050203 Oxalate-CoA ligase activity	OE9A028936 OE9A041775
	0.00092	11	1164	4.8	GO:0003700 Transcription factor activity, sequence-specific DNA binding	OE9A000299 OE9A028341 OE9A042006 OE9A043605 OE9A056651 OE9A076184 OE9A079911 OE9A097645 OE9A102799 OE9A105581 OE9A114387
	0.002	2	7	146.1	GO:0006839 Mitochondrial transport	OE9A090698 OE9A095768
	0.002	2	6	170.4	GO:0010214 Seed coat development	OE9A028936 OE9A041775
	0.002	2	7	146.1	GO:0016207 4-coumarate-CoA ligase activity	OE9A028936 OE9A041775
	0.005	13	2097	3.2	GO:0006355 Reg. of transcription, DNA-templated	OE9A000299 OE9A028341 OE9A042006 OE9A043605 OE9A056651 OE9A061095 OE9A076184 OE9A079911 OE9A089731 OE9A097645 OE9A102799 OE9A105581 OE9A114387
	0.0063	2	14	73	GO:0010030 Pos. reg. of seed germination	OE9A028936 OE9A041775
	0.015	2	23	44.5	GO:0048856 Anatomical structure development	OE9A091730 OE9A094040
	0.019	3	110	13.9	GO:0009395 Phospholipid catabolic process	OE9A017022 OE9A048783 OE9A080031
	0.019	2	28	36.5	GO:0031966 Mitochondrial membrane	OE9A090698 OE9A095768
	0.02	4	255	8	GO:0006470 Protein dephosphorylation	OE9A008243 OE9A056425 OE9A073332 OE9A092877
	0.05	3	168	9.1	GO:0046486 Glycerolipid metabolic process	OE9A017022 OE9A048783 OE9A115995
	0.05	2	52	19.7	GO:0050832 Defense response to fungus	OE9A028936 OE9A041775

## Sheet: DOWN FC<-2
List of Differential Expressed Genes (DEGs) FC <-2 in T6_Onion_Infect_
ID	baseMean	log2FoldChange	lfcSE	stat	pvalue	padj	id gene	Description
OE9A103263	6559.37	-6.63161	1.39526	-4.75296	2.00463e-06	0.000469607	OE9A103263	ID=OE9A103263T1;Parent=OE9A103263;Name=OE9A103263T1;product=OE9A103263P1
OE9A085396	7.50931	-6.43586	1.68867	-3.8112	0.000138293	0.0140946	OE9A085396	ID=OE9A085396T1;Parent=OE9A085396;Name=OE9A085396T1;product=OE9A085396P1;Description=FIZZY-RELATED 3;Ontology_term=GO:0010997%2C GO:0050790%2C GO:0097027
OE9A112228	8.31659	-6.30692	1.36224	-4.62982	3.65978e-06	0.000760823	OE9A112228	ID=OE9A112228T1;Parent=OE9A112228;Name=OE9A112228T1;product=OE9A112228P1;md5=d6b74484708f0c7c42686711ad6a26f1;INTERPRO=<table><tr><th>DB</th><th>ID</th><th>Description</th></tr><tr><td>Coils</td><td>Coil</td><td></td></tr><tr><td>Gene3D</td><td>G3DSA:1.20.1000.10</td><td></td></tr><tr><td>Gene3D</td><td>G3DSA:3.40.850.10</td><td></td></tr><tr><td>PANTHER</td><td>PTHR24115</td><td></td></tr><tr><t…
OE9A068403	4.47847	-6.06589	1.97261	-3.07506	0.00210457	0.0873869	OE9A068403	ID=OE9A068403T1;Parent=OE9A068403;Name=OE9A068403T1;product=OE9A068403P1;Description=serine threonine- kinase Aurora-3;Ontology_term=GO:0000780%2C GO:0005524%2C GO:0005876%2C GO:0007052%2C GO:0007059%2C GO:0009069%2C GO:0031616%2C GO:0032133%2C GO:0032465%2C GO:0035175%2C GO:0043987%2C GO:0043988%2C GO:0044022%2C GO:0051233
OE9A010913	4.19212	-6.0062	1.50986	-3.97799	6.95015e-05	0.0080844	OE9A010913	ID=OE9A010913T1;Parent=OE9A010913;Name=OE9A010913T1;product=OE9A010913P1;Description=S-acyltransferase 18;Ontology_term=GO:0008270%2C GO:0016020%2C GO:0016746
OE9A109692	4.8926	-5.69158	1.6989	-3.35015	0.00080768	0.0469199	OE9A109692	ID=OE9A109692T1;Parent=OE9A109692;Name=OE9A109692T1;product=OE9A109692P1;Description=ATP-dependent DNA helicase DDX11;Ontology_term=GO:0003677%2C GO:0004003%2C GO:0005524%2C GO:0005657%2C GO:0006139
OE9A010812	5.42125	-5.63278	1.55885	-3.61343	0.000302173	0.0245738	OE9A010812	ID=OE9A010812T1;Parent=OE9A010812;Name=OE9A010812T1;product=OE9A010812P1;Description=F-box At3g17265 isoform X2;Ontology_term=GO:0005515
OE9A092590	5.38265	-5.56085	1.61715	-3.43867	0.00058459	0.038231	OE9A092590	ID=OE9A092590T1;Parent=OE9A092590;Name=OE9A092590T1;product=OE9A092590P1
OE9A051100	3.42585	-5.41008	1.76626	-3.06302	0.00219117	0.0901482	OE9A051100	ID=OE9A051100T1;Parent=OE9A051100;Name=OE9A051100T1;product=OE9A051100P1;Description=NDR1 HIN1 12;Ontology_term=GO:0016021
OE9A011337	5.99706	-5.40876	1.79479	-3.0136	0.00258168	0.099818	OE9A011337	ID=OE9A011337T1;Parent=OE9A011337;Name=OE9A011337T1;product=OE9A011337P1
OE9A029191	10.1391	-5.3876	1.50887	-3.57061	0.000356149	0.027268	OE9A029191	ID=OE9A029191T1;Parent=OE9A029191;Name=OE9A029191T1;product=OE9A029191P1;Description=ethylene-responsive transcription factor 1B-like;Ontology_term=GO:0003677%2C GO:0003700%2C GO:0005634%2C GO:0005667%2C GO:0006355%2C GO:0045449
OE9A115641	3.90176	-5.2818	1.65913	-3.18347	0.0014552	0.0687954	OE9A115641	ID=OE9A115641T1;Parent=OE9A115641;Name=OE9A115641T1;product=OE9A115641P1;Description=BRANCHLESS TRICHOME;Ontology_term=GO:0010090
OE9A025323	4.12375	-5.10452	1.57112	-3.24897	0.00115822	0.0606896	OE9A025323	ID=OE9A025323T1;Parent=OE9A025323;Name=OE9A025323T1;product=OE9A025323P1;Description=uncharacterized protein LOC111402797;Ontology_term=GO:0016020
OE9A048798	5.33782	-5.0924	1.59273	-3.19729	0.00138726	0.0666884	OE9A048798	ID=OE9A048798T1;Parent=OE9A048798;Name=OE9A048798T1;product=OE9A048798P1;Description=cytochrome P450 71A6-like;Ontology_term=GO:0005506%2C GO:0016705%2C GO:0020037%2C GO:0055114
OE9A055987	5.2411	-4.94969	1.56714	-3.15843	0.00158621	0.0723333	OE9A055987	ID=OE9A055987T1;Parent=OE9A055987;Name=OE9A055987T1;product=OE9A055987P1;Description=NAD kinase 2, chloroplastic;Ontology_term=GO:0003951%2C GO:0006741%2C GO:0006769%2C GO:0019674%2C GO:0046497
OE9A098619	5.02072	-4.94347	1.52198	-3.24806	0.00116194	0.0606896	OE9A098619	ID=OE9A098619T1;Parent=OE9A098619;Name=OE9A098619T1;product=OE9A098619P1;Description=maf DDB_G0281937 isoform X2;Ontology_term=GO:0005737
OE9A049701	6.64626	-4.85288	1.52628	-3.17955	0.00147503	0.0692528	OE9A049701	ID=OE9A049701T1;Parent=OE9A049701;Name=OE9A049701T1;product=OE9A049701P1;md5=ade44e08156ef83314ec2d8749f63087;INTERPRO=<table><tr><th>DB</th><th>ID</th><th>Description</th></tr><tr><td>Gene3D</td><td>G3DSA:3.30.70.330</td><td></td></tr><tr><td>Pfam</td><td>PF00076</td><td>RNA recognition motif. (a.k.a. RRM%2C RBD%2C or RNP domain)</td></tr><tr><td>ProSiteProfiles</td><td>PS50102</td><td>Eukaryoti…
OE9A110893	3.81465	-4.78225	1.43484	-3.33294	0.00085933	0.0488682	OE9A110893	ID=OE9A110893T1;Parent=OE9A110893;Name=OE9A110893T1;product=OE9A110893P1;Description=probable acyl-activating enzyme 1, peroxisomal;Ontology_term=GO:0003824%2C GO:0006812%2C GO:0006885%2C GO:0008152%2C GO:0015299%2C GO:0016021%2C GO:0055085
OE9A026323	8.18998	-4.68764	1.45886	-3.21323	0.00131253	0.0649683	OE9A026323	ID=OE9A026323T1;Parent=OE9A026323;Name=OE9A026323T1;product=OE9A026323P1;Description=laccase-3-like;Ontology_term=GO:0005507%2C GO:0046274%2C GO:0048046%2C GO:0052716%2C GO:0055114
OE9A055964	5.24895	-4.23931	1.3717	-3.09054	0.00199792	0.0846227	OE9A055964	ID=OE9A055964T1;Parent=OE9A055964;Name=OE9A055964T1;product=OE9A055964P1
OE9A080356	36.6324	-4.22377	1.33771	-3.15747	0.00159144	0.0724012	OE9A080356	ID=OE9A080356T1;Parent=OE9A080356;Name=OE9A080356T1;product=OE9A080356P1;Description=probable WRKY transcription factor 40;Ontology_term=GO:0003700%2C GO:0005667%2C GO:0006355%2C GO:0043565%2C GO:0045449
OE9A071941	8.44758	-4.14961	1.23562	-3.35833	0.000784136	0.0459232	OE9A071941	ID=OE9A071941T1;Parent=OE9A071941;Name=OE9A071941T1;product=OE9A071941P1;Description=TIFY 5A-like;Ontology_term=GO:0050789
OE9A119707	14.1419	-4.10847	1.13954	-3.60538	0.000311702	0.0250888	OE9A119707	ID=OE9A119707T1;Parent=OE9A119707;Name=OE9A119707T1;product=OE9A119707P1
OE9A001646	18.7145	-4.04849	0.992197	-4.08033	4.4972e-05	0.00569241	OE9A001646	ID=OE9A001646T1;Parent=OE9A001646;Name=OE9A001646T1;product=OE9A001646P1;Description=transcription factor myb56;Ontology_term=GO:0003677
OE9A058915	8.71408	-4.00987	1.09402	-3.66528	0.000247073	0.0214138	OE9A058915	ID=OE9A058915T1;Parent=OE9A058915;Name=OE9A058915T1;product=OE9A058915P1;Description=NIM1-INTERACTING 2;Ontology_term=GO:0010112
OE9A106780	14.2708	-3.98474	1.23976	-3.21412	0.00130844	0.0649683	OE9A106780	ID=OE9A106780T1;Parent=OE9A106780;Name=OE9A106780T1;product=OE9A106780P1;Description=NETWORKED 4B;Ontology_term=GO:0003779
OE9A054727	15.0424	-3.79789	1.18773	-3.19761	0.00138574	0.0666884	OE9A054727	ID=OE9A054727T1;Parent=OE9A054727;Name=OE9A054727T1;product=OE9A054727P1;Description=probable LRR receptor-like serine threonine- kinase At4g36180;Ontology_term=GO:0004672%2C GO:0005515%2C GO:0005524%2C GO:0006468%2C GO:0016021
OE9A085895	18.2676	-3.75536	1.05549	-3.55793	0.000373789	0.0283421	OE9A085895	ID=OE9A085895T1;Parent=OE9A085895;Name=OE9A085895T1;product=OE9A085895P1;Description=DNA polymerase alpha subunit B;Ontology_term=GO:0003677%2C GO:0003887%2C GO:0005658%2C GO:0005739%2C GO:0006270%2C GO:0042575%2C GO:0046982%2C GO:0071897
OE9A004004	29.5369	-3.58489	0.862461	-4.15658	3.23051e-05	0.00427886	OE9A004004	ID=OE9A004004T1;Parent=OE9A004004;Name=OE9A004004T1;product=OE9A004004P1;Description=early nodulin 1;Ontology_term=GO:0006118%2C GO:0009055%2C GO:0016021%2C GO:0046658
OE9A055403	13.2276	-3.37709	1.05123	-3.2125	0.00131584	0.0649683	OE9A055403	ID=OE9A055403T1;Parent=OE9A055403;Name=OE9A055403T1;product=OE9A055403P1;Description=AAA-ATPase At5g57480-like;Ontology_term=GO:0005524%2C GO:0005739%2C GO:0034551
OE9A109526	14.3659	-3.33595	0.975195	-3.4208	0.000624374	0.0396756	OE9A109526	ID=OE9A109526T1;Parent=OE9A109526;Name=OE9A109526T1;product=OE9A109526P1;Description=DETOXIFICATION 24-like;Ontology_term=GO:0006855%2C GO:0015238%2C GO:0015297%2C GO:0016021
OE9A022667	20.8766	-3.325	0.760543	-4.37187	1.23187e-05	0.00203525	OE9A022667	ID=OE9A022667T1;Parent=OE9A022667;Name=OE9A022667T1;product=OE9A022667P1;Description=cyclin-A1-4 isoform X2;Ontology_term=GO:0005634
OE9A077577	16.0692	-3.28993	0.970896	-3.38855	0.000702622	0.0424154	OE9A077577	ID=OE9A077577T1;Parent=OE9A077577;Name=OE9A077577T1;product=OE9A077577P1;Description=NETWORKED 4B;Ontology_term=GO:0003779
OE9A043043	21.3123	-3.26107	0.890347	-3.6627	0.000249573	0.021464	OE9A043043	ID=OE9A043043T1;Parent=OE9A043043;Name=OE9A043043T1;product=OE9A043043P1;Description=FIZZY-RELATED 3;Ontology_term=GO:0010997%2C GO:0050790%2C GO:0097027
OE9A106137	22.5387	-3.22935	0.906563	-3.56218	0.000367781	0.0280107	OE9A106137	ID=OE9A106137T1;Parent=OE9A106137;Name=OE9A106137T1;product=OE9A106137P1
OE9A070761	47645.7	-3.11531	0.866309	-3.59607	0.000323058	0.0257388	OE9A070761	ID=OE9A070761T1;Parent=OE9A070761;Name=OE9A070761T1;product=OE9A070761P1
OE9mt000032	36.4103	-3.11437	0.812026	-3.8353	0.000125409	0.0129073	OE9mt000032	ID=OE9mt000032T1;Parent=OE9mt000032;product=OE9mt000032P1;Description=atp6;Name=OE9mt000032T1
OE9pt000038	53.0409	-3.01411	0.679538	-4.43552	9.18488e-06	0.00162894	OE9pt000038	ID=OE9pt000038T1;Parent=OE9pt000038;product=OE9pt000038P1;Description=psbE
OE9mt000014	23.7513	-2.99114	0.85934	-3.48074	0.000500036	0.0345022	OE9mt000014	ID=OE9mt000014T1;Parent=OE9mt000014;product=OE9mt000014P1;Description=nad1;Name=OE9mt000014T1
OE9A119914	12.4271	-2.95664	0.835456	-3.53895	0.000401719	0.0296715	OE9A119914	ID=OE9A119914T1;Parent=OE9A119914;Name=OE9A119914T1;product=OE9A119914P1
OE9A036327	10.4173	-2.94697	0.973971	-3.02572	0.0024804	0.0972065	OE9A036327	ID=OE9A036327T1;Parent=OE9A036327;Name=OE9A036327T1;product=OE9A036327P1
OE9A036068	9.84842	-2.93788	0.853181	-3.44345	0.000574353	0.0379229	OE9A036068	ID=OE9A036068T1;Parent=OE9A036068;Name=OE9A036068T1;product=OE9A036068P1;Description=transcription factor MYB108-like;Ontology_term=GO:0003677
OE9mt000016	19.2336	-2.85041	0.885957	-3.21732	0.00129394	0.0647816	OE9mt000016	ID=OE9mt000016T1;Parent=OE9mt000016;product=OE9mt000016P1;Description=nad4L;Name=OE9mt000016T1
OE9mt000004	30.9582	-2.84093	0.708449	-4.01007	6.07009e-05	0.00721765	OE9mt000004	ID=OE9mt000004T1;Parent=OE9mt000004;product=OE9mt000004P1;Description=nad2;Name=OE9mt000004T1
OE9A103329	10.4259	-2.77206	0.908376	-3.05167	0.00227573	0.0925357	OE9A103329	ID=OE9A103329T1;Parent=OE9A103329;Name=OE9A103329T1;product=OE9A103329P1
OE9A033947	56.0175	-2.75946	0.726402	-3.79881	0.000145395	0.0145995	OE9A033947	ID=OE9A033947T1;Parent=OE9A033947;Name=OE9A033947T1;product=OE9A033947P1;Description=cytochrome P450 78A6-like;Ontology_term=GO:0004497%2C GO:0005506%2C GO:0016021%2C GO:0016705%2C GO:0020037%2C GO:0055114
OE9A111333	15.0243	-2.74972	0.809006	-3.39889	0.000676589	0.0414012	OE9A111333	ID=OE9A111333T12;Parent=OE9A111333;Name=OE9A111333T12;product=OE9A111333P8;Description=transcription factor LHW isoform X1;Ontology_term=GO:0006355%2C GO:0044424%2C GO:0046983%2C GO:0048364
OE9A017135	13.6834	-2.7491	0.881957	-3.11704	0.00182675	0.0797545	OE9A017135	ID=OE9A017135T1;Parent=OE9A017135;Name=OE9A017135T1;product=OE9A017135P1;Description=probable calcium-binding CML45;Ontology_term=GO:0005509
OE9A088594	10.7	-2.74773	0.886045	-3.10112	0.00192789	0.0827886	OE9A088594	ID=OE9A088594T1;Parent=OE9A088594;Name=OE9A088594T1;product=OE9A088594P1
OE9A000757	388.267	-2.72154	0.736174	-3.69687	0.000218272	0.019689	OE9A000757	ID=OE9A000757T1;Parent=OE9A000757;Name=OE9A000757T1;product=OE9A000757P1
OE9pt000074	23.3612	-2.71711	0.833822	-3.25862	0.00111954	0.0594644	OE9pt000074	ID=OE9pt000074T1;Parent=OE9pt000074;product=OE9pt000074P1;Description=ndhG
OE9A052815	167393	-2.71205	0.718803	-3.77301	0.000161292	0.0159217	OE9A052815	ID=OE9A052815T1;Parent=OE9A052815;Name=OE9A052815T1;product=OE9A052815P1
OE9A098801	10.8066	-2.71126	0.887504	-3.05493	0.00225113	0.0917731	OE9A098801	ID=OE9A098801T1;Parent=OE9A098801;Name=OE9A098801T1;product=OE9A098801P1
OE9A056470	345083	-2.67636	0.74474	-3.59368	0.000326034	0.0258601	OE9A056470	ID=OE9A056470T1;Parent=OE9A056470;Name=OE9A056470T1;product=OE9A056470P1
OE9A066095	28.0847	-2.67311	0.847691	-3.1534	0.0016138	0.0732062	OE9A066095	ID=OE9A066095T1;Parent=OE9A066095;Name=OE9A066095T1;product=OE9A066095P1;Description=B3 domain-containing At3g17010-like;Ontology_term=GO:0003677
OE9A012119	17.1943	-2.66474	0.772689	-3.44866	0.000563377	0.0374764	OE9A012119	ID=OE9A012119T1;Parent=OE9A012119;Name=OE9A012119T1;product=OE9A012119P1;Description=cyclin-D3-1-like;Ontology_term=GO:0005634
OE9A025807	340.433	-2.66325	0.726657	-3.66507	0.00024727	0.0214138	OE9A025807	ID=OE9A025807T1;Parent=OE9A025807;Name=OE9A025807T1;product=OE9A025807P1
OE9mt000040	46.9664	-2.64824	0.79014	-3.35161	0.000803435	0.0467915	OE9mt000040	ID=OE9mt000040T1;Parent=OE9mt000040;product=OE9mt000040P1;Description=rpl10;Name=OE9mt000040T1
OE9A072320	16178.6	-2.63737	0.780187	-3.38044	0.000723705	0.0431195	OE9A072320	ID=OE9A072320T1;Parent=OE9A072320;Name=OE9A072320T1;product=OE9A072320P1;Description=thioredoxin 4B;Ontology_term=GO:0000245%2C GO:0005681%2C GO:0005682%2C GO:0046540
OE9mt000017	45.2636	-2.63366	0.788196	-3.34138	0.000833628	0.0480607	OE9mt000017	ID=OE9mt000017T1;Parent=OE9mt000017;product=OE9mt000017P1;Description=atp4;Name=OE9mt000017T1
OE9A045298	22.8321	-2.62623	0.729907	-3.59804	0.000320624	0.0256753	OE9A045298	ID=OE9A045298T1;Parent=OE9A045298;Name=OE9A045298T1;product=OE9A045298P1
OE9mt000015	170.108	-2.60173	0.748862	-3.47424	0.000512297	0.0351125	OE9mt000015	ID=OE9mt000015T1;Parent=OE9mt000015;product=OE9mt000015P1;Description=nad7;Name=OE9mt000015T1
OE9A000019	7067.68	-2.55849	0.831507	-3.07693	0.00209143	0.0870718	OE9A000019	ID=OE9A000019T1;Parent=OE9A000019;Name=OE9A000019T1;product=OE9A000019P1
OE9A020818	455321	-2.54232	0.725999	-3.50183	0.000462079	0.0328915	OE9A020818	ID=OE9A020818T1;Parent=OE9A020818;Name=OE9A020818T1;product=OE9A020818P1
OE9A028568	16.0262	-2.54008	0.721528	-3.52041	0.000430878	0.0312372	OE9A028568	ID=OE9A028568T1;Parent=OE9A028568;Name=OE9A028568T1;product=OE9A028568P1
OE9mt000024	34.9719	-2.53762	0.839839	-3.02155	0.00251482	0.0983096	OE9mt000024	ID=OE9mt000024T1;Parent=OE9mt000024;product=OE9mt000024P1;Description=ccmFn;Name=OE9mt000024T1
OE9A054074	16.8729	-2.51392	0.777885	-3.23174	0.00123039	0.0629935	OE9A054074	ID=OE9A054074T1;Parent=OE9A054074;Name=OE9A054074T1;product=OE9A054074P1;Description=uncharacterized protein LOC111380399;Ontology_term=GO:0016020
OE9A006738	276764	-2.51226	0.771671	-3.25562	0.00113147	0.0597944	OE9A006738	ID=OE9A006738T1;Parent=OE9A006738;Name=OE9A006738T1;product=OE9A006738P1
OE9mt000039	31.0576	-2.49762	0.75422	-3.31152	0.000927899	0.0511012	OE9mt000039	ID=OE9mt000039T1;Parent=OE9mt000039;product=OE9mt000039P1;Description=rps4;Name=OE9mt000039T1
OE9A074906	30.3432	-2.48036	0.666069	-3.72387	0.000196188	0.0181612	OE9A074906	ID=OE9A074906T1;Parent=OE9A074906;Name=OE9A074906T1;product=OE9A074906P1;Description=uncharacterized protein LOC111383969;Ontology_term=GO:0016021
OE9A038361	14.4935	-2.43839	0.78168	-3.11942	0.00181207	0.0792237	OE9A038361	ID=OE9A038361T1;Parent=OE9A038361;Name=OE9A038361T1;product=OE9A038361P1
OE9pt000013	36.3563	-2.43541	0.585485	-4.15965	3.18732e-05	0.00423954	OE9pt000013	ID=OE9pt000013T1;Parent=OE9pt000013;product=OE9pt000013P1;Description=rpoB
OE9A082461	10642.9	-2.43322	0.781208	-3.11468	0.00184143	0.0800746	OE9A082461	ID=OE9A082461T1;Parent=OE9A082461;Name=OE9A082461T1;product=OE9A082461P1
OE9A031498	45.6344	-2.416	0.748125	-3.22941	0.00124047	0.0629935	OE9A031498	ID=OE9A031498T1;Parent=OE9A031498;Name=OE9A031498T1;product=OE9A031498P1
OE9A107581	333267	-2.41126	0.707039	-3.41036	0.000648764	0.0405636	OE9A107581	ID=OE9A107581T1;Parent=OE9A107581;Name=OE9A107581T1;product=OE9A107581P1
OE9A023969	24017.9	-2.39959	0.615038	-3.90153	9.5585e-05	0.0102406	OE9A023969	ID=OE9A023969T1;Parent=OE9A023969;Name=OE9A023969T1;product=OE9A023969P1
OE9mt000001	137.631	-2.39612	0.614371	-3.90011	9.61482e-05	0.0102659	OE9mt000001	ID=OE9mt000001T1;Parent=OE9mt000001;product=OE9mt000001P1;Description=nad5;Name=OE9mt000001T1
OE9A019700	442024	-2.3881	0.701564	-3.40397	0.000664141	0.040879	OE9A019700	ID=OE9A019700T1;Parent=OE9A019700;Name=OE9A019700T1;product=OE9A019700P1
OE9A074222	291599	-2.38652	0.702725	-3.3961	0.000683545	0.0415837	OE9A074222	ID=OE9A074222T1;Parent=OE9A074222;Name=OE9A074222T1;product=OE9A074222P1
OE9A017410	171631	-2.36617	0.698094	-3.38947	0.000700274	0.0423551	OE9A017410	ID=OE9A017410T1;Parent=OE9A017410;Name=OE9A017410T1;product=OE9A017410P1
OE9A023348	237553	-2.36111	0.718781	-3.28488	0.00102026	0.0553141	OE9A023348	ID=OE9A023348T1;Parent=OE9A023348;Name=OE9A023348T1;product=OE9A023348P1
OE9pt000016	287.265	-2.35484	0.648788	-3.62959	0.000283866	0.0237031	OE9pt000016	ID=OE9pt000016T1;Parent=OE9pt000016;product=OE9pt000016P1;Description=psbD
OE9mt000052	784.423	-2.35467	0.685203	-3.43646	0.000589367	0.038304	OE9mt000052	ID=OE9mt000052T1;Parent=OE9mt000052;product=OE9mt000052P1;Description=atp1;Name=OE9mt000052T1
OE9A062869	45619.3	-2.35464	0.650614	-3.61911	0.000295623	0.0243567	OE9A062869	ID=OE9A062869T1;Parent=OE9A062869;Name=OE9A062869T1;product=OE9A062869P1
OE9A113171	13.6184	-2.3437	0.688628	-3.40343	0.000665451	0.040879	OE9A113171	ID=OE9A113171T1;Parent=OE9A113171;Name=OE9A113171T1;product=OE9A113171P1;Description=probable S-acyltransferase 7;Ontology_term=GO:0008270%2C GO:0016021%2C GO:0016491%2C GO:0019706%2C GO:0042967%2C GO:0055114
OE9pt000021	419.841	-2.34133	0.711882	-3.28893	0.00100568	0.054618	OE9pt000021	ID=OE9pt000021T1;Parent=OE9pt000021;product=OE9pt000021P1;Description=psaA
OE9A112630	40.7955	-2.33893	0.738268	-3.16813	0.00153421	0.071033	OE9A112630	ID=OE9A112630T1;Parent=OE9A112630;Name=OE9A112630T1;product=OE9A112630P1;Description=vinorine synthase-like;Ontology_term=GO:0016747
OE9mt000037	122.816	-2.30572	0.634436	-3.63428	0.00027876	0.0233972	OE9mt000037	ID=OE9mt000037T1;Parent=OE9mt000037;product=OE9mt000037P1;Description=atp9;Name=OE9mt000037T1
OE9A073171	45067.1	-2.29821	0.714295	-3.21745	0.00129335	0.0647816	OE9A073171	ID=OE9A073171T1;Parent=OE9A073171;Name=OE9A073171T1;product=OE9A073171P1
OE9A106261	56.9497	-2.28495	0.562094	-4.06506	4.80192e-05	0.00600546	OE9A106261	ID=OE9A106261T1;Parent=OE9A106261;Name=OE9A106261T1;product=OE9A106261P1;Description=NRT1 PTR FAMILY isoform X1;Ontology_term=GO:0005215%2C GO:0006810%2C GO:0016020
OE9pt000003	61.2202	-2.27204	0.567454	-4.00392	6.23023e-05	0.00738011	OE9pt000003	ID=OE9pt000003T1;Parent=OE9pt000003;product=OE9pt000003P1;Description=rps16
OE9pt000020	510.535	-2.25703	0.626328	-3.6036	0.000313842	0.0251964	OE9pt000020	ID=OE9pt000020T1;Parent=OE9pt000020;product=OE9pt000020P1;Description=psaB
OE9A073908	44.5511	-2.22692	0.525796	-4.23534	2.2821e-05	0.00325624	OE9A073908	ID=OE9A073908T1;Parent=OE9A073908;Name=OE9A073908T1;product=OE9A073908P1
OE9A031390	28.2583	-2.21783	0.713984	-3.10628	0.00189458	0.0815814	OE9A031390	ID=OE9A031390T1;Parent=OE9A031390;Name=OE9A031390T1;product=OE9A031390P1
OE9pt000017	757.21	-2.20293	0.585345	-3.76347	0.000167575	0.0162356	OE9pt000017	ID=OE9pt000017T1;Parent=OE9pt000017;product=OE9pt000017P1;Description=psbC
OE9mt000002	54.9121	-2.18804	0.710121	-3.08122	0.00206155	0.086056	OE9mt000002	ID=OE9mt000002T1;Parent=OE9mt000002;product=OE9mt000002P1;Description=nad5;Name=OE9mt000002T1
OE9A115484	49.5468	-2.18599	0.679002	-3.21941	0.00128456	0.0645593	OE9A115484	ID=OE9A115484T1;Parent=OE9A115484;Name=OE9A115484T1;product=OE9A115484P1;Description=major pollen allergen Lol p 11-like;Ontology_term=GO:0005615
OE9pt000019	181.415	-2.1845	0.521862	-4.18597	2.83955e-05	0.00389241	OE9pt000019	ID=OE9pt000019T1;Parent=OE9pt000019;product=OE9pt000019P1;Description=rps14
OE9mt000031	95.6708	-2.18406	0.588697	-3.71	0.000207262	0.018929	OE9mt000031	ID=OE9mt000031T1;Parent=OE9mt000031;product=OE9mt000031P1;Description=rps3;Name=OE9mt000031T1
OE9A054923	50.3837	-2.16342	0.588981	-3.67315	0.000239575	0.021007	OE9A054923	ID=OE9A054923T1;Parent=OE9A054923;Name=OE9A054923T1;product=OE9A054923P1
OE9pt000051	152.321	-2.12025	0.47903	-4.42614	9.59357e-06	0.00167943	OE9pt000051	ID=OE9pt000051T1;Parent=OE9pt000051;product=OE9pt000051P1;Description=petD
OE9mt000005	102.182	-2.09864	0.671262	-3.12641	0.00176953	0.0777974	OE9mt000005	ID=OE9mt000005T1;Parent=OE9mt000005;product=OE9mt000005P1;Description=nad2;Name=OE9mt000005T1
OE9A076233	8.46811	-2.06134	0.679519	-3.03353	0.00241709	0.0965329	OE9A076233	ID=OE9A076233T1;Parent=OE9A076233;Name=OE9A076233T1;product=OE9A076233P1;Description=60S ribosomal L36-2-like;Ontology_term=GO:0002181%2C GO:0003735%2C GO:0022625%2C GO:0042254
OE9pt000009	84.8624	-2.06109	0.60126	-3.42795	0.000608165	0.0390407	OE9pt000009	ID=OE9pt000009T1;Parent=OE9pt000009;product=OE9pt000009P1;Description=atpI
OE9pt000047	45.6586	-2.0362	0.50566	-4.02681	5.65391e-05	0.00677663	OE9pt000047	ID=OE9pt000047T1;Parent=OE9pt000047;product=OE9pt000047P1;Description=psbT
OE9A047267	61.6558	-2.02344	0.482527	-4.19343	2.74772e-05	0.00382562	OE9A047267	ID=OE9A047267T1;Parent=OE9A047267;Name=OE9A047267T1;product=OE9A047267P1;Description=DMR6-LIKE OXYGENASE 2-like;Ontology_term=GO:0005506%2C GO:0051213%2C GO:0055114

## Sheet: ShinyGO DOWN FC <-2
	Enrichment FDR	nGenes	Pathway Genes	Fold Enrichment	Pathways (click for details)	Genes
	0.011	2	12	87.6	GO:0010997 Anaphase-promoting complex binding	OE9A043043 OE9A085396
	0.011	2	11	95.6	GO:0097027 Ubiquitin-protein transferase activator activity	OE9A043043 OE9A085396
