# Supplementary material for: Comparative transcriptomics of biopesticide-treated olives subjected to Xylella infection
Source: Research Square preprint supplement (doi:10.21203/rs.3.rs-8603179/v1), 2026-01-29
Supplement: Supplementary file 13 [file bbfbffed7134b59d783bb80e.xlsx]

## Sheet: UP FC>2
List of Differential Expressed Genes (DEGs) fold change (FC) >2 of olives treated with PsJN at T2 compared with the same plants at T0.
Gene ID	baseMean	log2FoldChange	lfcSE	stat	pvalue	padj	id gene	Description
OE9A051307	88.1869	10.2111	1.51177	6.75441	1.43417e-11	5.13025e-10	OE9A051307	ID=OE9A051307T1;Parent=OE9A051307;Name=OE9A051307T1;product=OE9A051307P1;Description=probable glucan 1,3-beta-glucosidase A;Ontology_term=GO:0004553%2C GO:0005975%2C GO:0007015%2C GO:0051015
OE9A033224	77.6118	9.4868	1.39403	6.80533	1.00817e-11	3.7933e-10	OE9A033224	ID=OE9A033224T1;Parent=OE9A033224;Name=OE9A033224T1;product=OE9A033224P1;Description=glucan 1,3-beta-glucosidase A-like;Ontology_term=GO:0004338%2C GO:0005982%2C GO:0005985%2C GO:0007015%2C GO:0051015
OE9A075015	18.4123	8.61363	1.60652	5.36165	8.24644e-08	1.28562e-06	OE9A075015	ID=OE9A075015T1;Parent=OE9A075015;Name=OE9A075015T1;product=OE9A075015P1;Description=E3 ubiquitin- ligase PUB23-like;Ontology_term=GO:0004842%2C GO:0005488%2C GO:0016567
OE9A088586	21.476	8.56977	1.64633	5.20538	1.93603e-07	2.71605e-06	OE9A088586	ID=OE9A088586T1;Parent=OE9A088586;Name=OE9A088586T1;product=OE9A088586P1;Description=peroxidase A2-like;Ontology_term=GO:0004601%2C GO:0005576%2C GO:0006804%2C GO:0006979%2C GO:0020037%2C GO:0042744%2C GO:0046872%2C GO:0055114%2C GO:0098869
OE9A106481	36.148	8.4304	1.51464	5.56594	2.6074e-08	4.56888e-07	OE9A106481	ID=OE9A106481T1;Parent=OE9A106481;Name=OE9A106481T1;product=OE9A106481P1
OE9A099373	48.8896	8.33938	1.49112	5.59269	2.23574e-08	3.96549e-07	OE9A099373	ID=OE9A099373T1;Parent=OE9A099373;Name=OE9A099373T1;product=OE9A099373P1;Description=AT-hook motif nuclear-localized 17-like;Ontology_term=GO:0016020
OE9A049120	156.62	8.31751	1.27152	6.54137	6.09595e-11	1.88691e-09	OE9A049120	ID=OE9A049120T1;Parent=OE9A049120;Name=OE9A049120T1;product=OE9A049120P1;Description=sugar transport 13;Ontology_term=GO:0005358%2C GO:0005887%2C GO:0009506%2C GO:0015992%2C GO:0032440%2C GO:0046323%2C GO:0055114%2C GO:1904659
OE9A011527	17.913	7.94105	1.30803	6.07098	1.27129e-09	2.93003e-08	OE9A011527	ID=OE9A011527T1;Parent=OE9A011527;Name=OE9A011527T1;product=OE9A011527P1;Description=U-box domain-containing 21-like;Ontology_term=GO:0004842%2C GO:0005488%2C GO:0016567
OE9A030382	153.597	7.89122	1.14326	6.9024	5.11325e-12	2.02904e-10	OE9A030382	ID=OE9A030382T1;Parent=OE9A030382;Name=OE9A030382T1;product=OE9A030382P1;Description=sugar transport 13;Ontology_term=GO:0005358%2C GO:0005887%2C GO:0009506%2C GO:0015992%2C GO:0032440%2C GO:0046323%2C GO:0055114%2C GO:1904659
OE9A078174	34.0726	7.85522	1.64905	4.76347	1.90295e-06	2.07044e-05	OE9A078174	ID=OE9A078174T1;Parent=OE9A078174;Name=OE9A078174T1;product=OE9A078174P1
OE9A079030	83.3932	7.67012	1.06751	7.18506	6.71794e-13	3.16516e-11	OE9A079030	ID=OE9A079030T1;Parent=OE9A079030;Name=OE9A079030T1;product=OE9A079030P1;Description=receptor kinase At4g00960;Ontology_term=GO:0004672%2C GO:0005524%2C GO:0006468
OE9A048738	20.5604	7.58326	1.05012	7.22131	5.14883e-13	2.46958e-11	OE9A048738	ID=OE9A048738T1;Parent=OE9A048738;Name=OE9A048738T1;product=OE9A048738P1;Description=probable feruloyl esterase A;Ontology_term=GO:0006629%2C GO:0016787
OE9A100232	35.0466	7.52345	1.26404	5.95189	2.65061e-09	5.68645e-08	OE9A100232	ID=OE9A100232T1;Parent=OE9A100232;Name=OE9A100232T1;product=OE9A100232P1;Description=ethylene-responsive transcription factor ERF020-like;Ontology_term=GO:0003677%2C GO:0003700%2C GO:0005667%2C GO:0006355%2C GO:0045449
OE9A119528	13.7308	7.51948	1.0152	7.40689	1.29293e-13	7.10867e-12	OE9A119528	ID=OE9A119528T1;Parent=OE9A119528;Name=OE9A119528T1;product=OE9A119528P1;Description=cannabidiolic acid synthase-like;Ontology_term=GO:0016614%2C GO:0050660%2C GO:0055114
OE9A051384	56.4861	7.46664	1.45748	5.12298	3.00747e-07	4.0298e-06	OE9A051384	ID=OE9A051384T1;Parent=OE9A051384;Name=OE9A051384T1;product=OE9A051384P1;Description=E3 ubiquitin- ligase RHA2B-like;Ontology_term=GO:0005515%2C GO:0008270
OE9A103263	6337.6	7.31298	0.818097	8.93901	3.92664e-19	5.94467e-17	OE9A103263	ID=OE9A103263T1;Parent=OE9A103263;Name=OE9A103263T1;product=OE9A103263P1
OE9A014162	82.8754	7.30925	0.859163	8.50741	1.77863e-17	2.09655e-15	OE9A014162	ID=OE9A014162T1;Parent=OE9A014162;Name=OE9A014162T1;product=OE9A014162P1
OE9A096921	410.256	7.23933	0.821293	8.81456	1.20154e-18	1.67607e-16	OE9A096921	ID=OE9A096921T1;Parent=OE9A096921;Name=OE9A096921T1;product=OE9A096921P1;Description=pathogenesis-related STH-2-like;Ontology_term=GO:0006952%2C GO:0009607
OE9A087470	8.31249	7.22577	1.21525	5.9459	2.74944e-09	5.87087e-08	OE9A087470	ID=OE9A087470T1;Parent=OE9A087470;Name=OE9A087470T1;product=OE9A087470P1
OE9A076339	7.63432	7.19722	1.51366	4.75484	1.98604e-06	2.14806e-05	OE9A076339	ID=OE9A076339T1;Parent=OE9A076339;Name=OE9A076339T1;product=OE9A076339P1;Description=cytokinin dehydrogenase 5;Ontology_term=GO:0009690%2C GO:0016614%2C GO:0019139%2C GO:0050660%2C GO:0055114
OE9A078255	44.6224	7.18639	1.26241	5.6926	1.25122e-08	2.34147e-07	OE9A078255	ID=OE9A078255T1;Parent=OE9A078255;Name=OE9A078255T1;product=OE9A078255P1;Description=(-)-isopiperitenol (-)-carveol dehydrogenase, mitochondrial-like;Ontology_term=GO:0016491
OE9A106469	21.1819	7.1813	1.10415	6.5039	7.82614e-11	2.36293e-09	OE9A106469	ID=OE9A106469T1;Parent=OE9A106469;Name=OE9A106469T1;product=OE9A106469P1
OE9A062084	6.35682	7.11924	1.49572	4.75974	1.93845e-06	2.10332e-05	OE9A062084	ID=OE9A062084T1;Parent=OE9A062084;Name=OE9A062084T1;product=OE9A062084P1;Description=ethylene-responsive transcription factor 1A-like;Ontology_term=GO:0003677%2C GO:0003700%2C GO:0005667%2C GO:0006355%2C GO:0045449
OE9A106137	132.202	7.06693	1.00615	7.02372	2.16031e-12	9.18498e-11	OE9A106137	ID=OE9A106137T1;Parent=OE9A106137;Name=OE9A106137T1;product=OE9A106137P1
OE9A040012	5.77521	6.98947	1.34706	5.1887	2.11765e-07	2.9437e-06	OE9A040012	ID=OE9A040012T1;Parent=OE9A040012;Name=OE9A040012T1;product=OE9A040012P1;Description=nudix hydrolase 2-like isoform X1;Ontology_term=GO:0016787
OE9A014370	42.8166	6.96082	1.27685	5.45157	4.99259e-08	8.21655e-07	OE9A014370	ID=OE9A014370T1;Parent=OE9A014370;Name=OE9A014370T1;product=OE9A014370P1;Description=sterol 22-desaturase;Ontology_term=GO:0000249%2C GO:0004497%2C GO:0005506%2C GO:0016021%2C GO:0016126%2C GO:0020037%2C GO:0055114
OE9A082351	5.72057	6.95966	1.4922	4.66403	3.10081e-06	3.19009e-05	OE9A082351	ID=OE9A082351T1;Parent=OE9A082351;Name=OE9A082351T1;product=OE9A082351P1
OE9A083187	11.7482	6.94049	1.37697	5.0404	4.6456e-07	5.91939e-06	OE9A083187	ID=OE9A083187T1;Parent=OE9A083187;Name=OE9A083187T1;product=OE9A083187P1;Description=ethylene-responsive transcription factor ABR1-like;Ontology_term=GO:0003677%2C GO:0003700%2C GO:0005667%2C GO:0006355%2C GO:0045449
OE9A042006	405.354	6.87628	0.739504	9.2985	1.42446e-20	2.66099e-18	OE9A042006	ID=OE9A042006T1;Parent=OE9A042006;Name=OE9A042006T1;product=OE9A042006P1;Description=probable WRKY transcription factor 53;Ontology_term=GO:0003700%2C GO:0005667%2C GO:0006355%2C GO:0043565%2C GO:0045449
OE9A105450	71.9105	6.87207	0.689632	9.96483	2.17245e-23	6.54687e-21	OE9A105450	ID=OE9A105450T1;Parent=OE9A105450;Name=OE9A105450T1;product=OE9A105450P1;Description=probable WRKY transcription factor 53;Ontology_term=GO:0003700%2C GO:0005667%2C GO:0006355%2C GO:0043565%2C GO:0045449
OE9A099553	8.38934	6.79943	1.36056	4.99754	5.8066e-07	7.16804e-06	OE9A099553	ID=OE9A099553T1;Parent=OE9A099553;Name=OE9A099553T1;product=OE9A099553P1;Description=transcription factor HHO3-like;Ontology_term=GO:0003677
OE9A109354	4.43643	6.62399	1.21075	5.47098	4.47549e-08	7.46163e-07	OE9A109354	ID=OE9A109354T1;Parent=OE9A109354;Name=OE9A109354T1;product=OE9A109354P1;Description=DETOXIFICATION 40-like;Ontology_term=GO:0006855%2C GO:0015238%2C GO:0015297%2C GO:0016020
OE9A082808	31.8915	6.61392	0.888232	7.44616	9.60937e-14	5.41378e-12	OE9A082808	ID=OE9A082808T2;Parent=OE9A082808;Name=OE9A082808T2;product=OE9A082808P2;Description=subtilisin-like protease;Ontology_term=GO:0004252%2C GO:0005618%2C GO:0006508
OE9A077229	71.9004	6.57928	1.0838	6.07054	1.27482e-09	2.93603e-08	OE9A077229	ID=OE9A077229T1;Parent=OE9A077229;Name=OE9A077229T1;product=OE9A077229P1;Description=vetispiradiene synthase 2-like;Ontology_term=GO:0000287%2C GO:0008152%2C GO:0010333
OE9A009976	29.4545	6.53822	0.913098	7.16048	8.03961e-13	3.7166e-11	OE9A009976	ID=OE9A009976T1;Parent=OE9A009976;Name=OE9A009976T1;product=OE9A009976P1
OE9A007964	4.24637	6.5349	2.60645	2.5072	0.0121693	0.0398009	OE9A007964	ID=OE9A007964T1;Parent=OE9A007964;Name=OE9A007964T1;product=OE9A007964P1
OE9A056751	6.78885	6.47448	1.60039	4.04555	5.21996e-05	0.000385897	OE9A056751	ID=OE9A056751T1;Parent=OE9A056751;Name=OE9A056751T1;product=OE9A056751P1
OE9A050526	90.019	6.47389	1.0243	6.3203	2.61051e-10	7.00756e-09	OE9A050526	ID=OE9A050526T1;Parent=OE9A050526;Name=OE9A050526T1;product=OE9A050526P1;Description=vetispiradiene synthase 2-like;Ontology_term=GO:0000287%2C GO:0008152%2C GO:0010333
OE9A043019	6.70419	6.43648	1.28759	4.99885	5.76728e-07	7.13241e-06	OE9A043019	ID=OE9A043019T1;Parent=OE9A043019;Name=OE9A043019T1;product=OE9A043019P1;Description=LURP-one-related 10-like;Ontology_term=GO:0006952
OE9A002015	27.4955	6.43495	1.01354	6.34897	2.16766e-10	5.93348e-09	OE9A002015	ID=OE9A002015T1;Parent=OE9A002015;Name=OE9A002015T1;product=OE9A002015P1;Description=basic 7S globulin-like;Ontology_term=GO:0008233%2C GO:0019538
OE9A067989	6.35031	6.42226	1.35849	4.72749	2.27314e-06	2.42124e-05	OE9A067989	ID=OE9A067989T1;Parent=OE9A067989;Name=OE9A067989T1;product=OE9A067989P1;Description=heparanase 3;Ontology_term=GO:0005975%2C GO:0009505%2C GO:0016020%2C GO:0016798
OE9A066902	3.96513	6.41484	2.78725	2.30149	0.0213639	0.0626439	OE9A066902	ID=OE9A066902T1;Parent=OE9A066902;Name=OE9A066902T1;product=OE9A066902P1;Description=nudix hydrolase 2-like isoform X1;Ontology_term=GO:0016787
OE9A029225	24.6187	6.409	1.01471	6.31612	2.68215e-10	7.18781e-09	OE9A029225	ID=OE9A029225T1;Parent=OE9A029225;Name=OE9A029225T1;product=OE9A029225P1;Description=precursor of CEP16-like;Ontology_term=GO:0016020
OE9A118859	25.5441	6.39391	0.951236	6.72168	1.79641e-11	6.23069e-10	OE9A118859	ID=OE9A118859T1;Parent=OE9A118859;Name=OE9A118859T1;product=OE9A118859P1;Description=pathogenesis-related STH-2-like;Ontology_term=GO:0006952%2C GO:0009607
OE9A018887	42.3051	6.36686	0.65498	9.7207	2.46096e-22	6.11546e-20	OE9A018887	ID=OE9A018887T1;Parent=OE9A018887;Name=OE9A018887T1;product=OE9A018887P1
OE9A079394	3.59262	6.36479	2.95264	2.15563	0.0311127	0.0842672	OE9A079394	ID=OE9A079394T1;Parent=OE9A079394;Name=OE9A079394T1;product=OE9A079394P1;Description=peroxidase 44-like;Ontology_term=GO:0004601%2C GO:0005576%2C GO:0006804%2C GO:0006979%2C GO:0020037%2C GO:0042744%2C GO:0046872%2C GO:0055114%2C GO:0098869
OE9A082401	4.77376	6.35897	1.84618	3.44439	0.000572356	0.00306356	OE9A082401	ID=OE9A082401T1;Parent=OE9A082401;Name=OE9A082401T1;product=OE9A082401P1
OE9A006987	73.3906	6.33793	0.815382	7.77296	7.66744e-15	5.37124e-13	OE9A006987	ID=OE9A006987T1;Parent=OE9A006987;Name=OE9A006987T1;product=OE9A006987P1
OE9D002341	20.3106	6.33327	1.56648	4.04299	5.27732e-05	0.000389487	OE9D002341	ID=OE9D002341T1;Parent=OE9D002341;product=OE9D002341P1;Description=AUXIN-REGULATED GENE INVOLVED IN ORGAN SIZE-like;Ontology_term=GO:0016020;
OE9A025034	4.4248	6.32147	1.71627	3.68326	0.000230266	0.00140321	OE9A025034	ID=OE9A025034T1;Parent=OE9A025034;Name=OE9A025034T1;product=OE9A025034P1
OE9A118702	22.5707	6.31454	1.75526	3.59749	0.000321307	0.00186581	OE9A118702	ID=OE9A118702T1;Parent=OE9A118702;Name=OE9A118702T1;product=OE9A118702P1;Description=NADH-ubiquinone reductase complex 1 MLRQ subunit;Ontology_term=GO:0016021
OE9A119429	29.0411	6.29852	0.926551	6.79782	1.06216e-11	3.9666e-10	OE9A119429	ID=OE9A119429T1;Parent=OE9A119429;Name=OE9A119429T1;product=OE9A119429P1;Description=premnaspirodiene oxygenase-like;Ontology_term=GO:0005506%2C GO:0016020%2C GO:0016705%2C GO:0020037%2C GO:0055114
OE9A087137	3.85761	6.28632	1.46661	4.2863	1.81675e-05	0.000153327	OE9A087137	ID=OE9A087137T1;Parent=OE9A087137;Name=OE9A087137T1;product=OE9A087137P1
OE9A029265	5.86652	6.27053	1.31463	4.76981	1.84401e-06	2.01385e-05	OE9A029265	ID=OE9A029265T1;Parent=OE9A029265;Name=OE9A029265T1;product=OE9A029265P1;Description=serine threonine- kinase tricorner;Ontology_term=GO:0004672%2C GO:0005524%2C GO:0006468
OE9A112135	55.0499	6.26976	1.84855	3.39171	0.000694581	0.00363614	OE9A112135	ID=OE9A112135T1;Parent=OE9A112135;Name=OE9A112135T1;product=OE9A112135P1
OE9A105742	5.93307	6.24294	1.30355	4.78918	1.67462e-06	1.84654e-05	OE9A105742	ID=OE9A105742T1;Parent=OE9A105742;Name=OE9A105742T1;product=OE9A105742P1
OE9A048512	16.6057	6.23883	1.61499	3.86308	0.000111965	0.000754715	OE9A048512	ID=OE9A048512T1;Parent=OE9A048512;Name=OE9A048512T1;product=OE9A048512P1;Description=scopoletin glucosyltransferase-like;Ontology_term=GO:0009805%2C GO:0009809%2C GO:0009811%2C GO:0042802%2C GO:0050275
OE9A068567	3.78865	6.21494	1.2904	4.8163	1.46247e-06	1.64093e-05	OE9A068567	ID=OE9A068567T1;Parent=OE9A068567;Name=OE9A068567T1;product=OE9A068567P1
OE9A051438	422.615	6.20894	0.800587	7.75549	8.80061e-15	6.07185e-13	OE9A051438	ID=OE9A051438T1;Parent=OE9A051438;Name=OE9A051438T1;product=OE9A051438P1;Description=pathogenesis-related STH-2-like;Ontology_term=GO:0006952%2C GO:0009607
OE9A055807	5.58431	6.20518	1.30334	4.76098	1.92656e-06	2.09157e-05	OE9A055807	ID=OE9A055807T1;Parent=OE9A055807;Name=OE9A055807T1;product=OE9A055807P1;Description=pathogenesis-related STH-2-like;Ontology_term=GO:0006952%2C GO:0009607
OE9A097997	92.5993	6.20448	1.08648	5.71061	1.12572e-08	2.13034e-07	OE9A097997	ID=OE9A097997T1;Parent=OE9A097997;Name=OE9A097997T1;product=OE9A097997P1;Description=glucan endo-1,3-beta-glucosidase 11-like;Ontology_term=GO:0004553%2C GO:0005975%2C GO:0016021%2C GO:0030247%2C GO:0046658
OE9A078118	4.10665	6.18767	1.58061	3.91473	9.05046e-05	0.000624961	OE9A078118	ID=OE9A078118T1;Parent=OE9A078118;Name=OE9A078118T1;product=OE9A078118P1;Description=E3 ubiquitin- ligase PUB24-like;Ontology_term=GO:0004842%2C GO:0005488%2C GO:0016567
OE9A036862	6.00947	6.18761	1.39142	4.44698	8.70844e-06	8.00294e-05	OE9A036862	ID=OE9A036862T1;Parent=OE9A036862;Name=OE9A036862T1;product=OE9A036862P1;Description=probable stress-associated endoplasmic reticulum;Ontology_term=GO:0005783%2C GO:0006486%2C GO:0016020%2C GO:0030968
OE9A118184	3.56557	6.17985	1.64362	3.75991	0.000169974	0.00107645	OE9A118184	ID=OE9A118184T1;Parent=OE9A118184;Name=OE9A118184T1;product=OE9A118184P1;Description=phosphatidylinositol 3,4,5-trisphosphate 3-phosphatase and -tyrosine-phosphatase PTEN1;Ontology_term=GO:0004725%2C GO:0005515%2C GO:0006570%2C GO:0008138%2C GO:0009555%2C GO:0035335
OE9A110283	6.06451	6.17241	1.17379	5.25852	1.45219e-07	2.11724e-06	OE9A110283	ID=OE9A110283T1;Parent=OE9A110283;Name=OE9A110283T1;product=OE9A110283P1
OE9A114379	5.07806	6.16397	1.41808	4.3467	1.38201e-05	0.000120587	OE9A114379	ID=OE9A114379T1;Parent=OE9A114379;Name=OE9A114379T1;product=OE9A114379P1;Description=LEAF RUST 10 DISEASE-RESISTANCE LOCUS RECEPTOR-LIKE PROTEIN KINASE-like;Ontology_term=GO:0004672%2C GO:0005524%2C GO:0006468
OE9A106283	3.23593	6.14614	1.50059	4.09582	4.20679e-05	0.000319804	OE9A106283	ID=OE9A106283T1;Parent=OE9A106283;Name=OE9A106283T1;product=OE9A106283P1;Description=patatin 2;Ontology_term=GO:0004620%2C GO:0005737%2C GO:0009395%2C GO:0016020%2C GO:0046486%2C GO:0047372
OE9A090909	3.4012	6.13498	1.49037	4.11642	3.84804e-05	0.000296182	OE9A090909	ID=OE9A090909T1;Parent=OE9A090909;Name=OE9A090909T1;product=OE9A090909P1;Description=Fungal lipase-like domain containing;Ontology_term=GO:0006629
OE9A084881	4.59873	6.10545	1.15539	5.28432	1.26174e-07	1.86944e-06	OE9A084881	ID=OE9A084881T1;Parent=OE9A084881;Name=OE9A084881T1;product=OE9A084881P1;Description=LOB domain-containing 20;Ontology_term=GO:0009867%2C GO:1900150
OE9A026674	3.07224	6.10057	1.5267	3.99592	6.44436e-05	0.000464902	OE9A026674	ID=OE9A026674T1;Parent=OE9A026674;Name=OE9A026674T1;product=OE9A026674P1;Description=histone deacetylase 19;Ontology_term=GO:0005634%2C GO:0009294%2C GO:0009405%2C GO:0009861%2C GO:0016573%2C GO:0032041%2C GO:0045892%2C GO:0070932%2C GO:2000026
OE9A087555	12.2933	6.08199	1.10998	5.47938	4.26807e-08	7.15692e-07	OE9A087555	ID=OE9A087555T1;Parent=OE9A087555;Name=OE9A087555T1;product=OE9A087555P1;Description=G-type lectin S-receptor-like serine threonine- kinase At4g27290 isoform X1;Ontology_term=GO:0004674%2C GO:0005524%2C GO:0006468%2C GO:0009069
OE9A057780	5.4762	6.08128	1.59117	3.82189	0.000132434	0.000871005	OE9A057780	ID=OE9A057780T1;Parent=OE9A057780;Name=OE9A057780T1;product=OE9A057780P1;Description=beta-glucosidase-like;Ontology_term=GO:0004553%2C GO:0005975
OE9A026747	8.50515	6.07755	1.29189	4.7044	2.54619e-06	2.67815e-05	OE9A026747	ID=OE9A026747T1;Parent=OE9A026747;Name=OE9A026747T1;product=OE9A026747P1;Description=patatin 2;Ontology_term=GO:0004620%2C GO:0005737%2C GO:0009395%2C GO:0016020%2C GO:0046486%2C GO:0047372
OE9A104652	7.3293	6.05093	1.31369	4.60607	4.10347e-06	4.10527e-05	OE9A104652	ID=OE9A104652T1;Parent=OE9A104652;Name=OE9A104652T1;product=OE9A104652P1;Description=calcium-transporting ATPase 13, plasma membrane-type;Ontology_term=GO:0005488%2C GO:0016021
OE9A121161	4.98217	6.04576	1.43771	4.20513	2.60934e-05	0.000210593	OE9A121161	ID=OE9A121161T1;Parent=OE9A121161;Name=OE9A121161T1;product=OE9A121161P1;Description=cytochrome b561 and DOMON domain-containing At2g04850;Ontology_term=GO:0004497%2C GO:0016021%2C GO:0055114
OE9A021130	54.896	6.0111	0.917321	6.55288	5.64369e-11	1.75714e-09	OE9A021130	ID=OE9A021130T1;Parent=OE9A021130;Name=OE9A021130T1;product=OE9A021130P1;Description=GDSL esterase lipase APG;Ontology_term=GO:0016788%2C GO:0052886%2C GO:0052887%2C GO:0052889%2C GO:0055114
OE9A079990	104.4	6.00288	0.914994	6.56057	5.36029e-11	1.67543e-09	OE9A079990	ID=OE9A079990T1;Parent=OE9A079990;Name=OE9A079990T1;product=OE9A079990P1;Description=precursor of CEP16-like;Ontology_term=GO:0016021
OE9A083053	2.78308	5.9991	1.48994	4.0264	5.66365e-05	0.000414478	OE9A083053	ID=OE9A083053T1;Parent=OE9A083053;Name=OE9A083053T1;product=OE9A083053P1;Description=E3 ubiquitin- ligase PUB23-like;Ontology_term=GO:0004842%2C GO:0005488%2C GO:0016567
OE9A050725	14.4818	5.99474	1.19073	5.03451	4.79085e-07	6.07538e-06	OE9A050725	ID=OE9A050725T1;Parent=OE9A050725;Name=OE9A050725T1;product=OE9A050725P1
OE9A023269	4.48201	5.98702	1.16973	5.11829	3.08319e-07	4.12417e-06	OE9A023269	ID=OE9A023269T1;Parent=OE9A023269;Name=OE9A023269T1;product=OE9A023269P1;Description=high-affinity nitrate transporter -like;Ontology_term=GO:0016021%2C GO:0055085
OE9A096329	21.4008	5.97513	0.901882	6.62518	3.46824e-11	1.1282e-09	OE9A096329	ID=OE9A096329T1;Parent=OE9A096329;Name=OE9A096329T1;product=OE9A096329P1;Description=lysine histidine transporter 1-like;Ontology_term=GO:0016021
OE9A039016	2.98533	5.9751	1.42667	4.18813	2.81264e-05	0.000225237	OE9A039016	ID=OE9A039016T1;Parent=OE9A039016;Name=OE9A039016T1;product=OE9A039016P1
OE9A002800	109.028	5.97284	0.974233	6.13081	8.74321e-10	2.1047e-08	OE9A002800	ID=OE9A002800T1;Parent=OE9A002800;Name=OE9A002800T1;product=OE9A002800P1;Description=LYK5;Ontology_term=GO:0004672%2C GO:0005524%2C GO:0006468%2C GO:0016020
OE9A016877	5.01312	5.96704	1.68288	3.54573	0.000391526	0.00221204	OE9A016877	ID=OE9A016877T2;Parent=OE9A016877;Name=OE9A016877T2;product=OE9A016877P2;Description=endoglucanase 17-like;Ontology_term=GO:0005982%2C GO:0005985%2C GO:0008810%2C GO:0030245
OE9A071396	3.18339	5.95039	1.39107	4.27757	1.88942e-05	0.0001586	OE9A071396	ID=OE9A071396T1;Parent=OE9A071396;Name=OE9A071396T1;product=OE9A071396P1;Description=NAC transcription factor 29-like;Ontology_term=GO:0003677%2C GO:0006355
OE9A075157	2.89132	5.94856	1.43751	4.1381	3.502e-05	0.000272582	OE9A075157	ID=OE9A075157T1;Parent=OE9A075157;Name=OE9A075157T1;product=OE9A075157P1
OE9A094774	3.07228	5.93343	1.66762	3.55803	0.000373641	0.00212453	OE9A094774	ID=OE9A094774T1;Parent=OE9A094774;Name=OE9A094774T1;product=OE9A094774P1;Description=phenylalanine N-monooxygenase;Ontology_term=GO:0005506%2C GO:0016705%2C GO:0020037%2C GO:0055114
OE9A048798	28.5674	5.9274	1.16123	5.10444	3.31783e-07	4.39588e-06	OE9A048798	ID=OE9A048798T1;Parent=OE9A048798;Name=OE9A048798T1;product=OE9A048798P1;Description=cytochrome P450 71A6-like;Ontology_term=GO:0005506%2C GO:0016705%2C GO:0020037%2C GO:0055114
OE9A037220	2.6621	5.92463	2.08662	2.83934	0.00452071	0.0176561	OE9A037220	ID=OE9A037220T1;Parent=OE9A037220;Name=OE9A037220T1;product=OE9A037220P1;Description=xyloglucan endotransglucosylase hydrolase 3-like;Ontology_term=GO:0004553%2C GO:0005618%2C GO:0010411%2C GO:0016762%2C GO:0042546%2C GO:0048046
OE9A048914	50.2483	5.90646	0.634373	9.3107	1.26994e-20	2.38629e-18	OE9A048914	ID=OE9A048914T1;Parent=OE9A048914;Name=OE9A048914T1;product=OE9A048914P1
OE9A061339	3.71369	5.88215	1.1699	5.02789	4.95898e-07	6.25137e-06	OE9A061339	ID=OE9A061339T1;Parent=OE9A061339;Name=OE9A061339T1;product=OE9A061339P1;Description=receptor kinase 1;Ontology_term=GO:0004674%2C GO:0005515%2C GO:0005524%2C GO:0006468%2C GO:0009069%2C GO:0016020%2C GO:0048544
OE9A010853	397.874	5.87641	0.757151	7.76121	8.41244e-15	5.82922e-13	OE9A010853	ID=OE9A010853T1;Parent=OE9A010853;Name=OE9A010853T1;product=OE9A010853P1;Description=F-box At3g07870-like;Ontology_term=GO:0005515
OE9A015988	329.551	5.87347	0.717317	8.18812	2.65342e-16	2.56851e-14	OE9A015988	ID=OE9A015988T1;Parent=OE9A015988;Name=OE9A015988T1;product=OE9A015988P1;Description=mitochondrial phosphate carrier 3, mitochondrial-like;Ontology_term=GO:0006810%2C GO:0016021
OE9A085084	406.887	5.86897	0.712725	8.23456	1.80218e-16	1.81034e-14	OE9A085084	ID=OE9A085084T1;Parent=OE9A085084;Name=OE9A085084T1;product=OE9A085084P1;Description=(-)-isopiperitenol (-)-carveol dehydrogenase, mitochondrial-like;Ontology_term=GO:0016491
OE9A061404	2.64085	5.86841	1.29596	4.52823	5.94795e-06	5.70403e-05	OE9A061404	ID=OE9A061404T1;Parent=OE9A061404;Name=OE9A061404T1;product=OE9A061404P1;Description=late blight resistance homolog R1A-10;Ontology_term=GO:0043531
OE9A002730	36.5045	5.86368	1.76415	3.32381	0.000887968	0.00449386	OE9A002730	ID=OE9A002730T1;Parent=OE9A002730;Name=OE9A002730T1;product=OE9A002730P1;Description=crocetin glucosyltransferase, chloroplastic-like;Ontology_term=GO:0005215%2C GO:0006810%2C GO:0008152%2C GO:0009507%2C GO:0016020%2C GO:0016758
OE9A076290	5.79888	5.85509	1.25362	4.67056	3.0038e-06	3.11133e-05	OE9A076290	ID=OE9A076290T1;Parent=OE9A076290;Name=OE9A076290T1;product=OE9A076290P1;Description=probable polygalacturonase At3g15720;Ontology_term=GO:0004650%2C GO:0005982%2C GO:0005985
OE9A119659	3.03334	5.85401	1.80492	3.24336	0.00118128	0.00573912	OE9A119659	ID=OE9A119659T1;Parent=OE9A119659;Name=OE9A119659T1;product=OE9A119659P1;Description=peptide chain release factor 3, chloroplastic;Ontology_term=GO:0005840%2C GO:0006444%2C GO:0006449%2C GO:0016149%2C GO:0018444
OE9A106861	4.93209	5.84872	1.28603	4.54789	5.41856e-06	5.24358e-05	OE9A106861	ID=OE9A106861T1;Parent=OE9A106861;Name=OE9A106861T1;product=OE9A106861P1;Description=heavy metal-associated isoprenylated plant 3-like isoform X1;Ontology_term=GO:0030001%2C GO:0046872
OE9A073670	4.24987	5.83564	1.50165	3.88616	0.000101844	0.000694264	OE9A073670	ID=OE9A073670T1;Parent=OE9A073670;Name=OE9A073670T1;product=OE9A073670P1;Description=spermidine hydroxycinnamoyl transferase-like;Ontology_term=GO:0009555%2C GO:0016410%2C GO:0042967
OE9A085753	2.4852	5.81872	2.11297	2.75381	0.00589053	0.0219232	OE9A085753	ID=OE9A085753T1;Parent=OE9A085753;Name=OE9A085753T1;product=OE9A085753P1;Description=squamosa promoter-binding 7 isoform X2;Ontology_term=GO:0003677%2C GO:0005634%2C GO:0016020
OE9A095699	7.85927	5.79642	1.3815	4.19573	2.7199e-05	0.000218585	OE9A095699	ID=OE9A095699T1;Parent=OE9A095699;Name=OE9A095699T1;product=OE9A095699P1
OE9A102321	3.68843	5.79528	1.4912	3.88632	0.000101776	0.000694091	OE9A102321	ID=OE9A102321T1;Parent=OE9A102321;Name=OE9A102321T1;product=OE9A102321P1;Description=receptor kinase ZAR1;Ontology_term=GO:0004672%2C GO:0005524%2C GO:0006468%2C GO:0016021
OE9A033341	2.51606	5.78771	2.14303	2.70072	0.00691904	0.0250195	OE9A033341	ID=OE9A033341T1;Parent=OE9A033341;Name=OE9A033341T1;product=OE9A033341P1;Description=heat shock 83;Ontology_term=GO:0005524%2C GO:0006457%2C GO:0006950%2C GO:0051082
OE9A002971	3.19536	5.77277	1.78716	3.23015	0.00123727	0.00596941	OE9A002971	ID=OE9A002971T1;Parent=OE9A002971;Name=OE9A002971T1;product=OE9A002971P1
OE9A050985	8.72868	5.76786	1.14219	5.04985	4.42169e-07	5.67027e-06	OE9A050985	ID=OE9A050985T1;Parent=OE9A050985;Name=OE9A050985T1;product=OE9A050985P1;Description=NAC domain-containing 72-like;Ontology_term=GO:0003677%2C GO:0006355
OE9A049241	3.89328	5.76152	1.53284	3.75873	0.000170779	0.00108081	OE9A049241	ID=OE9A049241T1;Parent=OE9A049241;Name=OE9A049241T1;product=OE9A049241P1;Description=ATPase 8, plasma membrane-type;Ontology_term=GO:0005524%2C GO:0005887%2C GO:0006119%2C GO:0006754%2C GO:0008553%2C GO:0043231%2C GO:0046872%2C GO:0051453%2C GO:1902600
OE9A010654	3.90751	5.75602	1.76516	3.26091	0.00111056	0.00544357	OE9A010654	ID=OE9A010654T1;Parent=OE9A010654;Name=OE9A010654T1;product=OE9A010654P1
OE9A030195	55.3763	5.74707	1.06908	5.37571	7.62812e-08	1.19565e-06	OE9A030195	ID=OE9A030195T1;Parent=OE9A030195;Name=OE9A030195T1;product=OE9A030195P1;Description=Serine threonine kinase;Ontology_term=GO:0004674%2C GO:0005509%2C GO:0005515%2C GO:0005524%2C GO:0006468%2C GO:0009069%2C GO:0016021%2C GO:0030247
OE9A049068	8.50615	5.73423	1.24893	4.59132	4.40443e-06	4.35453e-05	OE9A049068	ID=OE9A049068T1;Parent=OE9A049068;Name=OE9A049068T1;product=OE9A049068P1;Description=ABC transporter G family member 9;Ontology_term=GO:0005524%2C GO:0005886%2C GO:0016021%2C GO:0042626%2C GO:0055085
OE9A047084	1555.87	5.73115	0.768655	7.45607	8.91417e-14	5.0668e-12	OE9A047084	ID=OE9A047084T1;Parent=OE9A047084;Name=OE9A047084T1;product=OE9A047084P1;Description=pathogenesis-related STH-2-like;Ontology_term=GO:0006952%2C GO:0009607
OE9A091532	5.06987	5.73071	1.71305	3.34532	0.000821866	0.00420665	OE9A091532	ID=OE9A091532T1;Parent=OE9A091532;Name=OE9A091532T1;product=OE9A091532P1;Description=calcium uniporter 4, mitochondrial-like;Ontology_term=GO:0006810%2C GO:0015292%2C GO:0016021
OE9A057563	3.8267	5.7228	1.43157	3.99757	6.39949e-05	0.000461873	OE9A057563	ID=OE9A057563T1;Parent=OE9A057563;Name=OE9A057563T1;product=OE9A057563P1
OE9A028191	2.72825	5.71802	2.18421	2.61789	0.00884745	0.0305704	OE9A028191	ID=OE9A028191T1;Parent=OE9A028191;Name=OE9A028191T1;product=OE9A028191P1
OE9A053206	3.79948	5.71514	1.42875	4.0001	6.33158e-05	0.0004578	OE9A053206	ID=OE9A053206T1;Parent=OE9A053206;Name=OE9A053206T1;product=OE9A053206P1;Description=histone-lysine N-methyltransferase EZA1-like isoform X5;Ontology_term=GO:0005515%2C GO:0031519
OE9A114567	2.45163	5.70498	1.72832	3.30088	0.000963832	0.00482128	OE9A114567	ID=OE9A114567T1;Parent=OE9A114567;Name=OE9A114567T1;product=OE9A114567P1;Description=phosphatidylinositol phosphatidylcholine transfer SFH12-like;Ontology_term=GO:0005215%2C GO:0005622%2C GO:0006810
OE9A121970	47.5475	5.68471	0.659454	8.62034	6.67576e-18	8.39569e-16	OE9A121970	ID=OE9A121970T1;Parent=OE9A121970;Name=OE9A121970T1;product=OE9A121970P1;Description=E3 ubiquitin- ligase PUB24-like;Ontology_term=GO:0004842%2C GO:0005488%2C GO:0016567
OE9A053281	2.42257	5.67468	1.49921	3.78511	0.000153643	0.000988714	OE9A053281	ID=OE9A053281T1;Parent=OE9A053281;Name=OE9A053281T1;product=OE9A053281P1;Description=fatty-acid-binding 1-like;Ontology_term=GO:0016872
OE9A023426	2.98778	5.67095	1.6445	3.44844	0.000563839	0.00302914	OE9A023426	ID=OE9A023426T1;Parent=OE9A023426;Name=OE9A023426T1;product=OE9A023426P1
OE9A075946	7.91154	5.66989	1.10973	5.10925	3.23436e-07	4.29777e-06	OE9A075946	ID=OE9A075946T1;Parent=OE9A075946;Name=OE9A075946T1;product=OE9A075946P1;Description=ethylene-responsive transcription factor 5-like;Ontology_term=GO:0003677%2C GO:0003700%2C GO:0005667%2C GO:0006355%2C GO:0045449
OE9A106710	3.83425	5.66486	1.5695	3.60934	0.000306976	0.0017949	OE9A106710	ID=OE9A106710T1;Parent=OE9A106710;Name=OE9A106710T1;product=OE9A106710P1
OE9A016438	2.28048	5.63561	2.06117	2.73417	0.0062537	0.0230118	OE9A016438	ID=OE9A016438T1;Parent=OE9A016438;Name=OE9A016438T1;product=OE9A016438P1
OE9A003346	158.081	5.63483	0.530362	10.6245	2.29251e-26	1.10958e-23	OE9A003346	ID=OE9A003346T1;Parent=OE9A003346;Name=OE9A003346T1;product=OE9A003346P1;Description=Serine threonine kinase;Ontology_term=GO:0004672%2C GO:0005509%2C GO:0005524%2C GO:0006468%2C GO:0030247
OE9A061305	3.46287	5.63462	1.75799	3.20515	0.00134992	0.0064179	OE9A061305	ID=OE9A061305T1;Parent=OE9A061305;Name=OE9A061305T1;product=OE9A061305P1;Description=SKP1 21 isoform X1;Ontology_term=GO:0006511
OE9A070027	2.33614	5.63426	2.00675	2.80765	0.00499043	0.0191466	OE9A070027	ID=OE9A070027T1;Parent=OE9A070027;Name=OE9A070027T1;product=OE9A070027P1
OE9A108299	13.4125	5.63186	1.03647	5.43368	5.52033e-08	8.96044e-07	OE9A108299	ID=OE9A108299T1;Parent=OE9A108299;Name=OE9A108299T1;product=OE9A108299P1;Description=Serine threonine kinase;Ontology_term=GO:0004672%2C GO:0005524%2C GO:0006468
OE9A058083	2.12676	5.63129	1.93968	2.9032	0.00369367	0.0149331	OE9A058083	ID=OE9A058083T1;Parent=OE9A058083;Name=OE9A058083T1;product=OE9A058083P1
OE9A053660	3.50882	5.62893	1.62572	3.46242	0.000535347	0.00289328	OE9A053660	ID=OE9A053660T1;Parent=OE9A053660;Name=OE9A053660T1;product=OE9A053660P1
OE9A076710	3.09674	5.62582	1.58526	3.54884	0.000386938	0.00219	OE9A076710	ID=OE9A076710T1;Parent=OE9A076710;Name=OE9A076710T1;product=OE9A076710P1;Description=ethylene-responsive transcription factor ERF020-like;Ontology_term=GO:0003677%2C GO:0003700%2C GO:0005667%2C GO:0006355%2C GO:0045449
OE9A089054	2.28479	5.62492	2.40718	2.33673	0.0194532	0.0580707	OE9A089054	ID=OE9A089054T1;Parent=OE9A089054;Name=OE9A089054T1;product=OE9A089054P1
OE9A087198	2.23233	5.61011	1.73888	3.22628	0.0012541	0.00603326	OE9A087198	ID=OE9A087198T1;Parent=OE9A087198;Name=OE9A087198T1;product=OE9A087198P1;Description=biotin carboxyl carrier of acetyl- carboxylase, chloroplastic-like;Ontology_term=GO:0003989%2C GO:0006090%2C GO:0006633%2C GO:0009317
OE9A062996	18.7111	5.59585	1.04801	5.33951	9.32005e-08	1.42681e-06	OE9A062996	ID=OE9A062996T1;Parent=OE9A062996;Name=OE9A062996T1;product=OE9A062996P1
OE9A038120	90.5508	5.59517	1.19846	4.66862	3.03224e-06	3.13266e-05	OE9A038120	ID=OE9A038120T1;Parent=OE9A038120;Name=OE9A038120T1;product=OE9A038120P1;Description=pathogenesis-related STH-2-like;Ontology_term=GO:0006952%2C GO:0009607
OE9A057194	7.95832	5.58886	1.1496	4.86156	1.16464e-06	1.33584e-05	OE9A057194	ID=OE9A057194T1;Parent=OE9A057194;Name=OE9A057194T1;product=OE9A057194P1;Description=fatty acid amide hydrolase-like;Ontology_term=GO:0016884
OE9A046683	65.0526	5.58671	1.10782	5.04298	4.58342e-07	5.84949e-06	OE9A046683	ID=OE9A046683T1;Parent=OE9A046683;Name=OE9A046683T1;product=OE9A046683P1;Description=serine carboxypeptidase-like 50;Ontology_term=GO:0004185%2C GO:0006508
OE9A064565	5.86713	5.58559	1.50885	3.70188	0.000214008	0.00131539	OE9A064565	ID=OE9A064565T1;Parent=OE9A064565;Name=OE9A064565T1;product=OE9A064565P1;Description=pyruvate dehydrogenase E1 component subunit alpha-3, chloroplastic-like;Ontology_term=GO:0008152%2C GO:0016624
OE9A008483	2.48725	5.58465	2.00399	2.78676	0.00532371	0.0201996	OE9A008483	ID=OE9A008483T1;Parent=OE9A008483;Name=OE9A008483T1;product=OE9A008483P1
OE9A064427	3.5639	5.57915	1.36913	4.07496	4.60227e-05	0.000345673	OE9A064427	ID=OE9A064427T1;Parent=OE9A064427;Name=OE9A064427T1;product=OE9A064427P1
OE9A105680	2.28194	5.57026	1.50599	3.69873	0.000216684	0.00132983	OE9A105680	ID=OE9A105680T1;Parent=OE9A105680;Name=OE9A105680T1;product=OE9A105680P1;Description=ribulose-1,5-bisphosphate carboxylase oxygenase large subunit, partial (chloroplast);Ontology_term=GO:0000287%2C GO:0004497%2C GO:0009573%2C GO:0016984%2C GO:0019253%2C GO:0046487%2C GO:0055114
OE9A010394	2.10275	5.56875	1.82133	3.05752	0.00223177	0.00978608	OE9A010394	ID=OE9A010394T1;Parent=OE9A010394;Name=OE9A010394T1;product=OE9A010394P1;Description=auxin-responsive SAUR72-like;Ontology_term=GO:0009733
OE9A102722	3.04897	5.5678	2.2082	2.52142	0.0116883	0.038496	OE9A102722	ID=OE9A102722T1;Parent=OE9A102722;Name=OE9A102722T1;product=OE9A102722P1
OE9A043940	85.992	5.56254	0.529254	10.5102	7.75631e-26	3.39408e-23	OE9A043940	ID=OE9A043940T1;Parent=OE9A043940;Name=OE9A043940T1;product=OE9A043940P1;Description=zinc finger CONSTANS-LIKE 6;Ontology_term=GO:0005515
OE9A064717	3.79239	5.56135	1.69791	3.2754	0.00105512	0.00521165	OE9A064717	ID=OE9A064717T1;Parent=OE9A064717;Name=OE9A064717T1;product=OE9A064717P1;Description=transcription factor HEC2-like;Ontology_term=GO:0046983
OE9A061800	2.39653	5.56067	1.76556	3.14953	0.00163535	0.00752581	OE9A061800	ID=OE9A061800T1;Parent=OE9A061800;Name=OE9A061800T1;product=OE9A061800P1;Description=AP2-like ethylene-responsive transcription factor At1g79700;Ontology_term=GO:0003677%2C GO:0003700%2C GO:0005667%2C GO:0006355%2C GO:0045449
OE9A087037	84.4673	5.55635	0.912021	6.09235	1.11267e-09	2.60009e-08	OE9A087037	ID=OE9A087037T1;Parent=OE9A087037;Name=OE9A087037T1;product=OE9A087037P1;Description=glutamate receptor -like;Ontology_term=GO:0004970%2C GO:0006811%2C GO:0007165%2C GO:0007268%2C GO:0016020
OE9A099785	2.30483	5.55116	1.88801	2.94022	0.0032798	0.0135397	OE9A099785	ID=OE9A099785T1;Parent=OE9A099785;Name=OE9A099785T1;product=OE9A099785P1;Description=calcium-transporting ATPase 13, plasma membrane-type;Ontology_term=GO:0005388%2C GO:0005524%2C GO:0016021%2C GO:0016529%2C GO:0046872%2C GO:0070588
OE9A031797	4.71292	5.54766	1.50111	3.6957	0.000219279	0.0013442	OE9A031797	ID=OE9A031797T1;Parent=OE9A031797;Name=OE9A031797T1;product=OE9A031797P1;Description=hydroxymethylglutaryl- synthase;Ontology_term=GO:0004421%2C GO:0006084%2C GO:0006550%2C GO:0006552%2C GO:0006574%2C GO:0008299%2C GO:0046950
OE9A053710	2.24535	5.54673	1.84221	3.01091	0.00260469	0.0111415	OE9A053710	ID=OE9A053710T1;Parent=OE9A053710;Name=OE9A053710T1;product=OE9A053710P1;Description=probable indole-3-pyruvate monooxygenase YUCCA11;Ontology_term=GO:0004499%2C GO:0050660%2C GO:0050661%2C GO:0055114
OE9A008785	32.3974	5.5434	0.700217	7.9167	2.43907e-15	1.8882e-13	OE9A008785	ID=OE9A008785T1;Parent=OE9A008785;Name=OE9A008785T1;product=OE9A008785P1;Description=L-type lectin-domain containing receptor kinase -like;Ontology_term=GO:0004672%2C GO:0005524%2C GO:0006468%2C GO:0016020%2C GO:0030246
OE9A106798	26.8413	5.53267	1.16678	4.74184	2.11786e-06	2.27405e-05	OE9A106798	ID=OE9A106798T1;Parent=OE9A106798;Name=OE9A106798T1;product=OE9A106798P1;Description=pyruvate decarboxylase 1;Ontology_term=GO:0000287%2C GO:0004737%2C GO:0005829%2C GO:0006094%2C GO:0006096%2C GO:0009507%2C GO:0016020%2C GO:0030976%2C GO:0034059
OE9A008555	28.6325	5.5325	0.856065	6.46271	1.02846e-10	3.00576e-09	OE9A008555	ID=OE9A008555T1;Parent=OE9A008555;Name=OE9A008555T1;product=OE9A008555P1;Description=U-box domain-containing 21-like;Ontology_term=GO:0004842%2C GO:0005488%2C GO:0016567
OE9A087291	28.6597	5.52981	0.77794	7.10828	1.175e-12	5.27906e-11	OE9A087291	ID=OE9A087291T1;Parent=OE9A087291;Name=OE9A087291T1;product=OE9A087291P1;Description=probable calcium-binding CML44;Ontology_term=GO:0005509
OE9A016001	1.99422	5.52874	1.96161	2.81847	0.00482524	0.0186337	OE9A016001	ID=OE9A016001T1;Parent=OE9A016001;Name=OE9A016001T1;product=OE9A016001P1;Description=NDR1-like;Ontology_term=GO:0005886
OE9A071129	9.68193	5.52442	1.08268	5.10255	3.35108e-07	4.43075e-06	OE9A071129	ID=OE9A071129T1;Parent=OE9A071129;Name=OE9A071129T1;product=OE9A071129P1;Description=G-type lectin S-receptor-like serine threonine- kinase RLK1;Ontology_term=GO:0004672%2C GO:0005524%2C GO:0006468%2C GO:0016020
OE9A070888	4.79065	5.52214	1.32861	4.15634	3.2338e-05	0.000254184	OE9A070888	ID=OE9A070888T1;Parent=OE9A070888;Name=OE9A070888T1;product=OE9A070888P1
OE9A034524	3.29063	5.51493	1.41715	3.89157	9.95989e-05	0.000680554	OE9A034524	ID=OE9A034524T1;Parent=OE9A034524;Name=OE9A034524T1;product=OE9A034524P1
OE9A045773	3.30904	5.50816	1.2888	4.27388	1.921e-05	0.000160892	OE9A045773	ID=OE9A045773T1;Parent=OE9A045773;Name=OE9A045773T1;product=OE9A045773P1;Description=gamma aminobutyrate transaminase 1, mitochondrial;Ontology_term=GO:0008483%2C GO:0009507%2C GO:0030170%2C GO:0042802
OE9A079320	2.51916	5.50261	1.95493	2.81473	0.00488179	0.0188088	OE9A079320	ID=OE9A079320T1;Parent=OE9A079320;Name=OE9A079320T1;product=OE9A079320P1
OE9A073382	2.21397	5.50255	1.74503	3.15327	0.00161454	0.00744442	OE9A073382	ID=OE9A073382T1;Parent=OE9A073382;Name=OE9A073382T1;product=OE9A073382P1
OE9A081420	2.04409	5.49622	2.32464	2.36433	0.0180626	0.0547068	OE9A081420	ID=OE9A081420T1;Parent=OE9A081420;Name=OE9A081420T1;product=OE9A081420P1;Description=G-type lectin S-receptor-like serine threonine- kinase At4g27290;Ontology_term=GO:0004674%2C GO:0005524%2C GO:0006468%2C GO:0009069%2C GO:0048544
OE9A106987	2.94056	5.47778	1.78562	3.06772	0.00215696	0.0095116	OE9A106987	ID=OE9A106987T1;Parent=OE9A106987;Name=OE9A106987T1;product=OE9A106987P1;Description=NAC domain-containing 72-like;Ontology_term=GO:0003677%2C GO:0006355
OE9A000524	3.44453	5.47267	1.53616	3.56257	0.000367246	0.00209375	OE9A000524	ID=OE9A000524T1;Parent=OE9A000524;Name=OE9A000524T1;product=OE9A000524P1;Description=zinc finger CCCH domain-containing 39-like;Ontology_term=GO:0046872
OE9A061144	3.0862	5.45995	1.78478	3.05917	0.00221952	0.00974172	OE9A061144	ID=OE9A061144T1;Parent=OE9A061144;Name=OE9A061144T1;product=OE9A061144P1
OE9A024604	18.8329	5.45005	0.960485	5.67427	1.39285e-08	2.58832e-07	OE9A024604	ID=OE9A024604T1;Parent=OE9A024604;Name=OE9A024604T1;product=OE9A024604P1;Description=IQ domain-containing IQM1-like;Ontology_term=GO:0005515
OE9A116782	104.33	5.44867	0.773153	7.04734	1.82372e-12	7.89391e-11	OE9A116782	ID=OE9A116782T1;Parent=OE9A116782;Name=OE9A116782T1;product=OE9A116782P1;Description=LEAF RUST 10 DISEASE-RESISTANCE LOCUS RECEPTOR-LIKE PROTEIN KINASE-like isoform X1;Ontology_term=GO:0004672%2C GO:0005524%2C GO:0006468%2C GO:0016020
OE9A075177	3.04876	5.44421	1.45898	3.73153	0.000190321	0.00118833	OE9A075177	ID=OE9A075177T1;Parent=OE9A075177;Name=OE9A075177T1;product=OE9A075177P1
OE9A014666	3.30526	5.44375	1.57696	3.45205	0.000556344	0.00299139	OE9A014666	ID=OE9A014666T1;Parent=OE9A014666;Name=OE9A014666T1;product=OE9A014666P1
OE9A004576	3.24069	5.44071	1.20944	4.49853	6.84253e-06	6.45724e-05	OE9A004576	ID=OE9A004576T1;Parent=OE9A004576;Name=OE9A004576T1;product=OE9A004576P1
OE9A012570	1.89293	5.42928	2.25809	2.40436	0.0162006	0.0500835	OE9A012570	ID=OE9A012570T1;Parent=OE9A012570;Name=OE9A012570T1;product=OE9A012570P1;Description=ethylene-responsive transcription factor RAP2-12-like;Ontology_term=GO:0003677%2C GO:0003700%2C GO:0005634%2C GO:0005667%2C GO:0006355%2C GO:0045449
OE9A039036	3.31062	5.42896	1.61017	3.37167	0.000747128	0.00387691	OE9A039036	ID=OE9A039036T1;Parent=OE9A039036;Name=OE9A039036T1;product=OE9A039036P1
OE9A082110	2.8544	5.42762	1.72819	3.14064	0.00168579	0.00772164	OE9A082110	ID=OE9A082110T1;Parent=OE9A082110;Name=OE9A082110T1;product=OE9A082110P1;Description=monothiol glutaredoxin-S9-like;Ontology_term=GO:0005623%2C GO:0006118%2C GO:0009055%2C GO:0015035%2C GO:0045454%2C GO:0055114
OE9A103435	151.674	5.42437	0.743351	7.29719	2.93836e-13	1.48753e-11	OE9A103435	ID=OE9A103435T1;Parent=OE9A103435;Name=OE9A103435T1;product=OE9A103435P1;Description=myb-related Myb4-like;Ontology_term=GO:0003677
OE9A010847	32.781	5.41129	0.81653	6.62718	3.42155e-11	1.11415e-09	OE9A010847	ID=OE9A010847T1;Parent=OE9A010847;Name=OE9A010847T1;product=OE9A010847P1;Description=F-box At2g27310;Ontology_term=GO:0005515%2C GO:0016020
OE9A100065	115.471	5.40832	0.564688	9.57753	9.93928e-22	2.17466e-19	OE9A100065	ID=OE9A100065T1;Parent=OE9A100065;Name=OE9A100065T1;product=OE9A100065P1;Description=probable L-type lectin-domain containing receptor kinase;Ontology_term=GO:0004674%2C GO:0004714%2C GO:0005524%2C GO:0007169%2C GO:0009069%2C GO:0016021%2C GO:0018108%2C GO:0030246
OE9A100047	2.63053	5.40589	1.56832	3.44692	0.000567008	0.0030431	OE9A100047	ID=OE9A100047T1;Parent=OE9A100047;Name=OE9A100047T1;product=OE9A100047P1;Description=Putative late blight resistance protein homolog R1B-13
OE9A055559	9.14049	5.40246	1.31217	4.11719	3.83516e-05	0.000295277	OE9A055559	ID=OE9A055559T1;Parent=OE9A055559;Name=OE9A055559T1;product=OE9A055559P1;Description=dynein light chain, cytoplasmic-like;Ontology_term=GO:0007017%2C GO:0030286
OE9A120021	38.3405	5.39871	0.987718	5.46584	4.60729e-08	7.66539e-07	OE9A120021	ID=OE9A120021T1;Parent=OE9A120021;Name=OE9A120021T1;product=OE9A120021P1;Description=vetispiradiene synthase 2-like;Ontology_term=GO:0000287%2C GO:0008152%2C GO:0010333
OE9A052154	1.81268	5.39758	2.12347	2.54187	0.011026	0.0367082	OE9A052154	ID=OE9A052154T1;Parent=OE9A052154;Name=OE9A052154T1;product=OE9A052154P1
OE9A000149	2.8422	5.39666	1.41537	3.81289	0.00013735	0.000899263	OE9A000149	ID=OE9A000149T1;Parent=OE9A000149;Name=OE9A000149T1;product=OE9A000149P1;Description=probable indole-3-pyruvate monooxygenase YUCCA11;Ontology_term=GO:0004499%2C GO:0050660%2C GO:0050661%2C GO:0055114
OE9A052395	90.9964	5.39173	0.782686	6.88875	5.62847e-12	2.21423e-10	OE9A052395	ID=OE9A052395T1;Parent=OE9A052395;Name=OE9A052395T1;product=OE9A052395P1
OE9A114766	22.0272	5.39103	0.902863	5.97103	2.35754e-09	5.12308e-08	OE9A114766	ID=OE9A114766T1;Parent=OE9A114766;Name=OE9A114766T1;product=OE9A114766P1;Description=ethylene-responsive transcription factor ABR1-like;Ontology_term=GO:0003677%2C GO:0003700%2C GO:0005667%2C GO:0006355%2C GO:0045449
OE9A002076	2.15079	5.38889	1.87583	2.8728	0.00406851	0.0161587	OE9A002076	ID=OE9A002076T1;Parent=OE9A002076;Name=OE9A002076T1;product=OE9A002076P1;Description=agamous-like MADS-box AGL9 homolog;Ontology_term=GO:0001708%2C GO:0003677%2C GO:0003700%2C GO:0005634%2C GO:0005667%2C GO:0006355%2C GO:0010093%2C GO:0045449%2C GO:0046983%2C GO:0048481%2C GO:0048833
OE9A055320	2.66023	5.38593	1.90682	2.82457	0.00473447	0.0183519	OE9A055320	ID=OE9A055320T1;Parent=OE9A055320;Name=OE9A055320T1;product=OE9A055320P1;Description=metalloendo ase 3-MMP-like;Ontology_term=GO:0004222%2C GO:0005509%2C GO:0006508%2C GO:0008270%2C GO:0031012
OE9A047597	1.97132	5.38307	2.34992	2.29075	0.021978	0.0640966	OE9A047597	ID=OE9A047597T1;Parent=OE9A047597;Name=OE9A047597T1;product=OE9A047597P1;Description=serpin-ZX-like;Ontology_term=GO:0005615%2C GO:0006508%2C GO:0008233
OE9A071847	4090.29	5.36987	0.721502	7.44263	9.87006e-14	5.54111e-12	OE9A071847	ID=OE9A071847T1;Parent=OE9A071847;Name=OE9A071847T1;product=OE9A071847P1
OE9A106444	2.34026	5.3669	1.6902	3.17531	0.00149678	0.00700045	OE9A106444	ID=OE9A106444T1;Parent=OE9A106444;Name=OE9A106444T1;product=OE9A106444P1;Description=Adenylosuccinate lyase;Ontology_term=GO:0004018%2C GO:0006144%2C GO:0006188%2C GO:0006522%2C GO:0006531%2C GO:0051262%2C GO:0070626
OE9A100070	58.3894	5.36627	0.647635	8.28595	1.17167e-16	1.21056e-14	OE9A100070	ID=OE9A100070T1;Parent=OE9A100070;Name=OE9A100070T1;product=OE9A100070P1
OE9A092719	3.12073	5.36203	1.81064	2.9614	0.00306244	0.0127544	OE9A092719	ID=OE9A092719T1;Parent=OE9A092719;Name=OE9A092719T1;product=OE9A092719P1;Description=1-aminocyclopropane-1-carboxylate synthase;Ontology_term=GO:0006519%2C GO:0009693%2C GO:0009835%2C GO:0016847%2C GO:0030170%2C GO:0042218
OE9A088497	3.55999	5.3596	1.24386	4.30885	1.64103e-05	0.000140426	OE9A088497	ID=OE9A088497T1;Parent=OE9A088497;Name=OE9A088497T1;product=OE9A088497P1
OE9A091206	2.87251	5.35672	1.62576	3.29491	0.000984533	0.00490791	OE9A091206	ID=OE9A091206T1;Parent=OE9A091206;Name=OE9A091206T1;product=OE9A091206P1;Description=polyamine oxidase 1;Ontology_term=GO:0006598%2C GO:0046592%2C GO:0050660%2C GO:0055114
OE9A040002	3.48342	5.35476	1.25013	4.28336	1.84091e-05	0.000155039	OE9A040002	ID=OE9A040002T1;Parent=OE9A040002;Name=OE9A040002T1;product=OE9A040002P1;Description=secretory carrier-associated membrane 5;Ontology_term=GO:0015031%2C GO:0016021
OE9A056519	2.69131	5.35471	2.0073	2.66761	0.00763921	0.0271715	OE9A056519	ID=OE9A056519T1;Parent=OE9A056519;Name=OE9A056519T1;product=OE9A056519P1;Description=scopoletin glucosyltransferase-like;Ontology_term=GO:0016757
OE9A007781	169.146	5.35093	0.741873	7.21274	5.48391e-13	2.6146e-11	OE9A007781	ID=OE9A007781T1;Parent=OE9A007781;Name=OE9A007781T1;product=OE9A007781P1;Description=blue copper -like;Ontology_term=GO:0006118%2C GO:0009055
OE9A017874	5.11609	5.34923	1.2995	4.11638	3.84877e-05	0.000296182	OE9A017874	ID=OE9A017874T1;Parent=OE9A017874;Name=OE9A017874T1;product=OE9A017874P1
OE9A034367	2.54495	5.34857	2.46001	2.1742	0.0296898	0.0812274	OE9A034367	ID=OE9A034367T1;Parent=OE9A034367;Name=OE9A034367T1;product=OE9A034367P1
OE9A011498	31.1551	5.34479	1.31745	4.05693	4.97222e-05	0.000369207	OE9A011498	ID=OE9A011498T1;Parent=OE9A011498;Name=OE9A011498T1;product=OE9A011498P1;Description=vetispiradiene synthase 2-like;Ontology_term=GO:0000287%2C GO:0008152%2C GO:0010333
OE9A076172	2.72848	5.3436	1.66291	3.21341	0.00131171	0.0062642	OE9A076172	ID=OE9A076172T1;Parent=OE9A076172;Name=OE9A076172T1;product=OE9A076172P1;Description=E3 ubiquitin- ligase PUB23-like;Ontology_term=GO:0004842%2C GO:0005488%2C GO:0016567
OE9A031694	2.03532	5.33837	1.86858	2.85691	0.00427788	0.0168499	OE9A031694	ID=OE9A031694T1;Parent=OE9A031694;Name=OE9A031694T1;product=OE9A031694P1;Description=G-type lectin S-receptor-like serine threonine- kinase At4g27290 isoform X2;Ontology_term=GO:0048544
OE9A102306	36.9067	5.33432	1.0394	5.13212	2.86501e-07	3.85997e-06	OE9A102306	ID=OE9A102306T1;Parent=OE9A102306;Name=OE9A102306T1;product=OE9A102306P1;Description=ethylene-responsive transcription factor ERF096-like;Ontology_term=GO:0003677%2C GO:0003700%2C GO:0005634%2C GO:0005667%2C GO:0006355%2C GO:0045449
OE9A017599	27.9973	5.33032	0.808199	6.59531	4.2436e-11	1.35693e-09	OE9A017599	ID=OE9A017599T1;Parent=OE9A017599;Name=OE9A017599T1;product=OE9A017599P1;Description=probable calcium-binding CML44;Ontology_term=GO:0005509
OE9A101007	27.671	5.32569	0.907597	5.8679	4.41354e-09	9.03179e-08	OE9A101007	ID=OE9A101007T1;Parent=OE9A101007;Name=OE9A101007T1;product=OE9A101007P1;Description=vetispiradiene synthase 2-like;Ontology_term=GO:0000287%2C GO:0008152%2C GO:0010333
OE9A115679	2.39858	5.32334	2.05463	2.59091	0.00957233	0.0326129	OE9A115679	ID=OE9A115679T1;Parent=OE9A115679;Name=OE9A115679T1;product=OE9A115679P1
OE9A013634	5.8399	5.3192	1.26924	4.19087	2.77891e-05	0.000222815	OE9A013634	ID=OE9A013634T1;Parent=OE9A013634;Name=OE9A013634T1;product=OE9A013634P1;Description=thaumatin;Ontology_term=GO:0005515%2C GO:0005576%2C GO:0031640%2C GO:0050832
OE9A060505	1411.69	5.3178	0.526103	10.1079	5.0967e-24	1.69593e-21	OE9A060505	ID=OE9A060505T1;Parent=OE9A060505;Name=OE9A060505T1;product=OE9A060505P1;Description=endochitinase EP3-like;Ontology_term=GO:0004568%2C GO:0005975%2C GO:0006032%2C GO:0008061%2C GO:0016998
OE9A083031	1.78205	5.31424	2.22845	2.38473	0.0170918	0.0523558	OE9A083031	ID=OE9A083031T1;Parent=OE9A083031;Name=OE9A083031T1;product=OE9A083031P1
OE9A015938	4.32697	5.3141	1.40204	3.79027	0.000150485	0.000971917	OE9A015938	ID=OE9A015938T1;Parent=OE9A015938;Name=OE9A015938T1;product=OE9A015938P1;Description=cytosolic Fe-S cluster assembly factor NBP35;Ontology_term=GO:0005488
OE9A021755	1.855	5.31254	1.73449	3.06289	0.00219212	0.00963338	OE9A021755	ID=OE9A021755T1;Parent=OE9A021755;Name=OE9A021755T1;product=OE9A021755P1;Description=wall-associated receptor kinase 2-like;Ontology_term=GO:0004672%2C GO:0005515%2C GO:0009987%2C GO:0016020%2C GO:0030247
OE9A088424	3.6918	5.30558	1.3036	4.06994	4.70246e-05	0.000352288	OE9A088424	ID=OE9A088424T1;Parent=OE9A088424;Name=OE9A088424T1;product=OE9A088424P1;Description=RING-H2 finger ATL21A;Ontology_term=GO:0005515%2C GO:0008270
OE9A003618	3.3973	5.30384	1.50633	3.52103	0.000429872	0.00239774	OE9A003618	ID=OE9A003618T1;Parent=OE9A003618;Name=OE9A003618T1;product=OE9A003618P1;Description=WUSCHEL-related homeobox 3;Ontology_term=GO:0003677
OE9A050748	1.80147	5.30002	2.39846	2.20976	0.0271218	0.0756265	OE9A050748	ID=OE9A050748T1;Parent=OE9A050748;Name=OE9A050748T1;product=OE9A050748P1
OE9A007123	6.13381	5.29881	1.40477	3.77202	0.00016193	0.00103219	OE9A007123	ID=OE9A007123T1;Parent=OE9A007123;Name=OE9A007123T1;product=OE9A007123P1;Description=phospholipase A2-alpha;Ontology_term=GO:0004623%2C GO:0009395%2C GO:0016020%2C GO:0050482
OE9A073760	1.88732	5.29732	1.94826	2.71901	0.00654783	0.0239181	OE9A073760	ID=OE9A073760T2;Parent=OE9A073760;Name=OE9A073760T2;product=OE9A073760P2;Description=agamous-like MADS-box AGL15;Ontology_term=GO:0003677%2C GO:0003700%2C GO:0005634%2C GO:0005667%2C GO:0006355%2C GO:0045449%2C GO:0046983
OE9A013848	3.11021	5.2959	1.54994	3.41685	0.0006335	0.00335375	OE9A013848	ID=OE9A013848T1;Parent=OE9A013848;Name=OE9A013848T1;product=OE9A013848P1;Description=phospholipase A(1) DAD1, chloroplastic-like;Ontology_term=GO:0006629%2C GO:0016787
OE9A076685	2.05195	5.29518	1.50416	3.52036	0.000430957	0.00240253	OE9A076685	ID=OE9A076685T1;Parent=OE9A076685;Name=OE9A076685T1;product=OE9A076685P1;Description=phospho-2-dehydro-3-deoxyheptonate aldolase 2, chloroplastic-like;Ontology_term=GO:0000162%2C GO:0003849%2C GO:0006571%2C GO:0009094
OE9A051211	1012.73	5.29114	0.856783	6.17558	6.59199e-10	1.62857e-08	OE9A051211	ID=OE9A051211T1;Parent=OE9A051211;Name=OE9A051211T1;product=OE9A051211P1;Description=beta-glucosidase-like;Ontology_term=GO:0004553%2C GO:0005975
OE9A119393	11.4669	5.29051	1.01269	5.22421	1.74904e-07	2.48505e-06	OE9A119393	ID=OE9A119393T1;Parent=OE9A119393;Name=OE9A119393T1;product=OE9A119393P1;Description=homeobox-leucine zipper HDG1-like isoform X3;Ontology_term=GO:0003677%2C GO:0008289
OE9A036267	1.82675	5.28791	2.53491	2.08603	0.0369758	0.0963095	OE9A036267	ID=OE9A036267T1;Parent=OE9A036267;Name=OE9A036267T1;product=OE9A036267P1
OE9A053138	1.91957	5.28282	2.48535	2.12559	0.0335377	0.0893593	OE9A053138	ID=OE9A053138T1;Parent=OE9A053138;Name=OE9A053138T1;product=OE9A053138P1;Description=probable phosphatase 2C 76;Ontology_term=GO:0004722%2C GO:0006470%2C GO:0008287%2C GO:0046872
OE9A046895	1.95557	5.28041	1.67057	3.16084	0.00157315	0.00728932	OE9A046895	ID=OE9A046895T1;Parent=OE9A046895;Name=OE9A046895T1;product=OE9A046895P1
OE9A013812	2.91876	5.26963	1.34947	3.90495	9.42459e-05	0.000647857	OE9A013812	ID=OE9A013812T1;Parent=OE9A013812;Name=OE9A013812T1;product=OE9A013812P1;Description=probable starch synthase 4, chloroplastic amyloplastic;Ontology_term=GO:0004373%2C GO:0005982%2C GO:0005985%2C GO:0009507
OE9A036164	3.00773	5.26832	1.90898	2.75976	0.00578439	0.0215961	OE9A036164	ID=OE9A036164T1;Parent=OE9A036164;Name=OE9A036164T1;product=OE9A036164P1
OE9A017767	2.78094	5.26825	1.58636	3.32096	0.000897079	0.0045335	OE9A017767	ID=OE9A017767T1;Parent=OE9A017767;Name=OE9A017767T1;product=OE9A017767P1;Description=polygalacturonase QRT2-like;Ontology_term=GO:0004650%2C GO:0005982%2C GO:0005985
OE9A059989	1.85718	5.26613	2.39414	2.19959	0.0278363	0.077248	OE9A059989	ID=OE9A059989T1;Parent=OE9A059989;Name=OE9A059989T1;product=OE9A059989P1;Description=NAC domain-containing 90-like;Ontology_term=GO:0003677%2C GO:0006355
OE9A056938	14.2476	5.26385	1.9811	2.65703	0.00788318	0.0278593	OE9A056938	ID=OE9A056938T1;Parent=OE9A056938;Name=OE9A056938T1;product=OE9A056938P1;Description=epidermis-specific secreted glyco EP1-like;Ontology_term=GO:0048544
OE9A121245	1.70689	5.25933	1.93503	2.71795	0.0065687	0.0239779	OE9A121245	ID=OE9A121245T1;Parent=OE9A121245;Name=OE9A121245T1;product=OE9A121245P1;Description=SOMBRERO-like;Ontology_term=GO:0003677%2C GO:0005634%2C GO:0006355
OE9mt000012	28.2732	5.25699	0.75709	6.94368	3.8202e-12	1.55258e-10	OE9mt000012	ID=OE9mt000012T1;Parent=OE9mt000012;product=OE9mt000012P1;Description=nad1;Name=OE9mt000012T1
OE9A052491	2.76767	5.25506	1.5292	3.43647	0.000589337	0.00314339	OE9A052491	ID=OE9A052491T1;Parent=OE9A052491;Name=OE9A052491T1;product=OE9A052491P1;Description=premnaspirodiene oxygenase-like;Ontology_term=GO:0004497%2C GO:0005506%2C GO:0016020%2C GO:0016705%2C GO:0020037%2C GO:0055114
OE9A056416	1.81481	5.24644	1.65604	3.16807	0.00153456	0.00714682	OE9A056416	ID=OE9A056416T1;Parent=OE9A056416;Name=OE9A056416T1;product=OE9A056416P1;Description=receptor 12;Ontology_term=GO:0005515
OE9A055966	3.63141	5.24367	1.43335	3.65834	0.000253856	0.00152342	OE9A055966	ID=OE9A055966T1;Parent=OE9A055966;Name=OE9A055966T1;product=OE9A055966P1;Description=heterogeneous nuclear ribonucleo Q;Ontology_term=GO:0000166%2C GO:0000245%2C GO:0003723%2C GO:0015030
OE9A060805	1.72258	5.24078	2.34447	2.23539	0.0253921	0.0717936	OE9A060805	ID=OE9A060805T1;Parent=OE9A060805;Name=OE9A060805T1;product=OE9A060805P1;Description=cytosolic sulfotransferase 12-like;Ontology_term=GO:0008146
OE9A026825	2.40008	5.2378	1.49308	3.50805	0.000451408	0.00249996	OE9A026825	ID=OE9A026825T1;Parent=OE9A026825;Name=OE9A026825T1;product=OE9A026825P1;Description=purine permease 3-like;Ontology_term=GO:0005215%2C GO:0006810%2C GO:0016021
OE9A034404	2.28189	5.23646	1.40614	3.724	0.000196088	0.00121983	OE9A034404	ID=OE9A034404T1;Parent=OE9A034404;Name=OE9A034404T1;product=OE9A034404P1;Description=dynein light chain, cytoplasmic-like;Ontology_term=GO:0007017%2C GO:0030286
OE9A117924	5.66844	5.23533	1.5979	3.27638	0.00105148	0.00519543	OE9A117924	ID=OE9A117924T1;Parent=OE9A117924;Name=OE9A117924T1;product=OE9A117924P1;Description=calcium-binding CML19;Ontology_term=GO:0005509
OE9A059474	199.225	5.23097	0.63732	8.20776	2.25357e-16	2.21501e-14	OE9A059474	ID=OE9A059474T1;Parent=OE9A059474;Name=OE9A059474T1;product=OE9A059474P1
OE9A102910	70.4461	5.22712	0.953387	5.48269	4.18913e-08	7.03933e-07	OE9A102910	ID=OE9A102910T1;Parent=OE9A102910;Name=OE9A102910T1;product=OE9A102910P1;Description=ethylene-responsive transcription factor 1A-like;Ontology_term=GO:0003677%2C GO:0003700%2C GO:0005667%2C GO:0006355%2C GO:0045449
OE9A070833	5.90641	5.22696	1.19988	4.35624	1.32315e-05	0.000115958	OE9A070833	ID=OE9A070833T1;Parent=OE9A070833;Name=OE9A070833T1;product=OE9A070833P1;Description=F-box At2g27310;Ontology_term=GO:0005515
OE9A081984	7.78763	5.22379	1.21986	4.28227	1.84992e-05	0.000155674	OE9A081984	ID=OE9A081984T1;Parent=OE9A081984;Name=OE9A081984T1;product=OE9A081984P1;Description=Xyloglucan endotransglucosylase hydrolase 2;Ontology_term=GO:0004553%2C GO:0005618%2C GO:0010411%2C GO:0016762%2C GO:0042546%2C GO:0048046%2C GO:0071555
OE9A093930	1.72148	5.21525	1.96556	2.65331	0.00797055	0.0280997	OE9A093930	ID=OE9A093930T1;Parent=OE9A093930;Name=OE9A093930T1;product=OE9A093930P1;Description=metalloendo ase 2-MMP-like;Ontology_term=GO:0004222%2C GO:0005509%2C GO:0006508%2C GO:0008270%2C GO:0031012
OE9A048790	8.02645	5.21427	0.998198	5.22369	1.75396e-07	2.48795e-06	OE9A048790	ID=OE9A048790T1;Parent=OE9A048790;Name=OE9A048790T1;product=OE9A048790P1;Description=cyclic nucleotide-gated ion channel 8;Ontology_term=GO:0005249%2C GO:0005515%2C GO:0008076%2C GO:0042391%2C GO:0071805
OE9A054136	1.80841	5.21341	1.69571	3.07447	0.00210875	0.00931959	OE9A054136	ID=OE9A054136T1;Parent=OE9A054136;Name=OE9A054136T1;product=OE9A054136P1
OE9A026570	1.97268	5.2098	1.97064	2.64371	0.00820019	0.0287601	OE9A026570	ID=OE9A026570T1;Parent=OE9A026570;Name=OE9A026570T1;product=OE9A026570P1;Description=peptidyl-prolyl cis-trans isomerase CYP21-4;Ontology_term=GO:0000413%2C GO:0003755%2C GO:0005794%2C GO:0006457%2C GO:0016021
OE9A037607	2.9296	5.20474	1.58326	3.28736	0.00101131	0.00501868	OE9A037607	ID=OE9A037607T1;Parent=OE9A037607;Name=OE9A037607T1;product=OE9A037607P1;Description=ATP-dependent exoDNAse (exonuclease V) beta subunit (contains helicase and exonuclease domains);Ontology_term=GO:0005524%2C GO:0016787
OE9A054617	752.641	5.2012	0.896443	5.80204	6.55133e-09	1.29502e-07	OE9A054617	ID=OE9A054617T1;Parent=OE9A054617;Name=OE9A054617T1;product=OE9A054617P1;Description=beta-glucosidase-like;Ontology_term=GO:0004553%2C GO:0005975
OE9A042037	55.5615	5.19997	0.761275	6.83062	8.45512e-12	3.22689e-10	OE9A042037	ID=OE9A042037T1;Parent=OE9A042037;Name=OE9A042037T1;product=OE9A042037P1;Description=vetispiradiene synthase 2-like;Ontology_term=GO:0000287%2C GO:0008152%2C GO:0010333
OE9A044885	2.15247	5.19644	1.57088	3.30797	0.00093974	0.00472146	OE9A044885	ID=OE9A044885T1;Parent=OE9A044885;Name=OE9A044885T1;product=OE9A044885P1
OE9A093732	1.75851	5.19633	1.96894	2.63916	0.00831122	0.0290531	OE9A093732	ID=OE9A093732T1;Parent=OE9A093732;Name=OE9A093732T1;product=OE9A093732P1;Description=hydroxyproline O-galactosyltransferase GALT3;Ontology_term=GO:0006486%2C GO:0008378%2C GO:0016020%2C GO:0030246
OE9A052087	1.87637	5.19522	1.73982	2.98607	0.00282587	0.0119499	OE9A052087	ID=OE9A052087T1;Parent=OE9A052087;Name=OE9A052087T1;product=OE9A052087P1;Description=wall-associated receptor kinase-like 8;Ontology_term=GO:0004672%2C GO:0005509%2C GO:0005515%2C GO:0005524%2C GO:0006468%2C GO:0030247
OE9A023360	153.753	5.19436	0.635521	8.17339	2.99852e-16	2.85074e-14	OE9A023360	ID=OE9A023360T1;Parent=OE9A023360;Name=OE9A023360T1;product=OE9A023360P1;Description=calcium-dependent kinase SK5-like;Ontology_term=GO:0004683%2C GO:0005509%2C GO:0005516%2C GO:0005524%2C GO:0005634%2C GO:0005737%2C GO:0005886%2C GO:0009069%2C GO:0009738%2C GO:0009931%2C GO:0018105%2C GO:0035556%2C GO:0046777
OE9A008605	9.5091	5.19153	1.00818	5.14939	2.61334e-07	3.55773e-06	OE9A008605	ID=OE9A008605T1;Parent=OE9A008605;Name=OE9A008605T1;product=OE9A008605P1;Description=heavy metal-associated isoprenylated plant 45;Ontology_term=GO:0030001%2C GO:0046872
OE9A051821	1.73375	5.18872	2.50741	2.06936	0.0385127	0.0993258	OE9A051821	ID=OE9A051821T1;Parent=OE9A051821;Name=OE9A051821T1;product=OE9A051821P1;Description=bidirectional sugar transporter N3-like;Ontology_term=GO:0005886%2C GO:0008643%2C GO:0016021
OE9A011873	2.51776	5.18528	1.94688	2.66338	0.00773608	0.0274222	OE9A011873	ID=OE9A011873T1;Parent=OE9A011873;Name=OE9A011873T1;product=OE9A011873P1;Description=abscisic acid 8 -hydroxylase 1-like;Ontology_term=GO:0004497%2C GO:0005506%2C GO:0016705%2C GO:0020037%2C GO:0055114
OE9A092069	4.03985	5.18487	1.37837	3.76159	0.000168838	0.00107003	OE9A092069	ID=OE9A092069T1;Parent=OE9A092069;Name=OE9A092069T1;product=OE9A092069P1;Description=nudix hydrolase 8-like;Ontology_term=GO:0016787
OE9A023146	12.4379	5.1845	1.052	4.92821	8.29868e-07	9.8621e-06	OE9A023146	ID=OE9A023146T1;Parent=OE9A023146;Name=OE9A023146T1;product=OE9A023146P1;Description=calmodulin 11;Ontology_term=GO:0005509
OE9A106742	4.22437	5.18021	1.59323	3.25138	0.00114846	0.005601	OE9A106742	ID=OE9A106742T1;Parent=OE9A106742;Name=OE9A106742T1;product=OE9A106742P1
OE9A093988	841.585	5.1778	0.903202	5.73271	9.88359e-09	1.88942e-07	OE9A093988	ID=OE9A093988T1;Parent=OE9A093988;Name=OE9A093988T1;product=OE9A093988P1;Description=beta-glucosidase-like;Ontology_term=GO:0004553%2C GO:0005975
OE9A114496	1.80895	5.17647	1.73701	2.98011	0.00288149	0.0121323	OE9A114496	ID=OE9A114496T1;Parent=OE9A114496;Name=OE9A114496T1;product=OE9A114496P1
OE9A036165	12.5387	5.17328	1.38103	3.74595	0.000179709	0.00113205	OE9A036165	ID=OE9A036165T1;Parent=OE9A036165;Name=OE9A036165T1;product=OE9A036165P1;Description=ethylene-responsive transcription factor 1B-like;Ontology_term=GO:0003677%2C GO:0003700%2C GO:0005634%2C GO:0005667%2C GO:0006355%2C GO:0045449
OE9A018778	1.61973	5.1729	1.63766	3.15871	0.00158469	0.00733644	OE9A018778	ID=OE9A018778T1;Parent=OE9A018778;Name=OE9A018778T1;product=OE9A018778P1;Description=G-type lectin S-receptor-like serine threonine- kinase LECRK3;Ontology_term=GO:0004674%2C GO:0005524%2C GO:0005886%2C GO:0006468%2C GO:0009069
OE9A106107	3.78761	5.17164	1.51678	3.40961	0.000650559	0.00343155	OE9A106107	ID=OE9A106107T1;Parent=OE9A106107;Name=OE9A106107T1;product=OE9A106107P1;Description=endochitinase EP3-like;Ontology_term=GO:0004568%2C GO:0006032%2C GO:0008061%2C GO:0016998
OE9A008238	2.07047	5.17083	1.61647	3.19885	0.00137978	0.00653361	OE9A008238	ID=OE9A008238T1;Parent=OE9A008238;Name=OE9A008238T1;product=OE9A008238P1;Description=(-)-isopiperitenol (-)-carveol dehydrogenase, mitochondrial-like;Ontology_term=GO:0016491
OE9A090118	1.73165	5.164	1.81622	2.84327	0.00446535	0.0174677	OE9A090118	ID=OE9A090118T1;Parent=OE9A090118;Name=OE9A090118T1;product=OE9A090118P1;Description=hypothetical protein A4A49_14860;Ontology_term=GO:0016020
OE9A005387	150.134	5.16045	0.70795	7.28928	3.11605e-13	1.56755e-11	OE9A005387	ID=OE9A005387T1;Parent=OE9A005387;Name=OE9A005387T1;product=OE9A005387P1;Description=uncharacterized protein LOC111409513;Ontology_term=GO:0016021
OE9A003178	2.46589	5.15913	1.60538	3.21365	0.00131058	0.00625974	OE9A003178	ID=OE9A003178T1;Parent=OE9A003178;Name=OE9A003178T1;product=OE9A003178P1;Description=receptor kinase 1;Ontology_term=GO:0004674%2C GO:0005515%2C GO:0005524%2C GO:0005886%2C GO:0006468%2C GO:0009069%2C GO:0016021%2C GO:0048544
OE9A118614	1.79161	5.1591	1.98196	2.60303	0.00924047	0.031651	OE9A118614	ID=OE9A118614T1;Parent=OE9A118614;Name=OE9A118614T1;product=OE9A118614P1;Description=NRT1 PTR FAMILY -like;Ontology_term=GO:0005215%2C GO:0006810%2C GO:0016020
OE9A078961	1.68212	5.15812	2.39635	2.15249	0.0313589	0.0847701	OE9A078961	ID=OE9A078961T1;Parent=OE9A078961;Name=OE9A078961T1;product=OE9A078961P1;Description=Ubiquitinyl hydrolase 1;Ontology_term=GO:0016579%2C GO:0036459
OE9A008581	8.33233	5.15737	1.07205	4.81073	1.50379e-06	1.67903e-05	OE9A008581	ID=OE9A008581T1;Parent=OE9A008581;Name=OE9A008581T1;product=OE9A008581P1;Description=cytokinin hydroxylase-like;Ontology_term=GO:0004497%2C GO:0005506%2C GO:0016021%2C GO:0016705%2C GO:0020037%2C GO:0055114
OE9A094625	2.3936	5.15477	1.87355	2.75133	0.0059353	0.0220616	OE9A094625	ID=OE9A094625T1;Parent=OE9A094625;Name=OE9A094625T1;product=OE9A094625P1
OE9A033885	1.81334	5.15239	1.99399	2.58396	0.00976733	0.0331605	OE9A033885	ID=OE9A033885T1;Parent=OE9A033885;Name=OE9A033885T1;product=OE9A033885P1
OE9A117209	12.6504	5.15086	0.830803	6.19985	5.65165e-10	1.41931e-08	OE9A117209	ID=OE9A117209T1;Parent=OE9A117209;Name=OE9A117209T1;product=OE9A117209P1
OE9A066476	4.64292	5.14501	1.42339	3.61462	0.000300789	0.00176204	OE9A066476	ID=OE9A066476T1;Parent=OE9A066476;Name=OE9A066476T1;product=OE9A066476P1
OE9A053428	2.68229	5.13747	1.52544	3.36786	0.000757554	0.00392123	OE9A053428	ID=OE9A053428T1;Parent=OE9A053428;Name=OE9A053428T1;product=OE9A053428P1;Description=21 kDa -like;Ontology_term=GO:0004857
OE9A066877	2.77302	5.13096	1.61729	3.17257	0.00151097	0.00705754	OE9A066877	ID=OE9A066877T1;Parent=OE9A066877;Name=OE9A066877T1;product=OE9A066877P1;Description=heat shock 70 kDa 15-like;Ontology_term=GO:0000166
OE9A010905	1.94666	5.12977	1.55725	3.29411	0.00098733	0.00491833	OE9A010905	ID=OE9A010905T1;Parent=OE9A010905;Name=OE9A010905T1;product=OE9A010905P1
OE9A031045	2.43269	5.12974	1.27392	4.02675	5.6553e-05	0.000414057	OE9A031045	ID=OE9A031045T1;Parent=OE9A031045;Name=OE9A031045T1;product=OE9A031045P1;Description=two-component response regulator ARR14-like;Ontology_term=GO:0000160%2C GO:0003677
OE9A026532	64.5828	5.1293	0.884621	5.7983	6.69897e-09	1.32339e-07	OE9A026532	ID=OE9A026532T1;Parent=OE9A026532;Name=OE9A026532T1;product=OE9A026532P1;Description=wall-associated receptor kinase-like 8;Ontology_term=GO:0004672%2C GO:0005509%2C GO:0005515%2C GO:0005524%2C GO:0006468%2C GO:0030247
OE9A043196	2.44179	5.12612	1.45497	3.52317	0.00042642	0.00238306	OE9A043196	ID=OE9A043196T1;Parent=OE9A043196;Name=OE9A043196T1;product=OE9A043196P1
OE9A035730	97.4248	5.12235	0.565484	9.05834	1.32449e-19	2.13685e-17	OE9A035730	ID=OE9A035730T1;Parent=OE9A035730;Name=OE9A035730T1;product=OE9A035730P1;Description=lachrymatory-factor synthase;Ontology_term=GO:0004864%2C GO:0004872%2C GO:0005634%2C GO:0005737%2C GO:0009738%2C GO:0010427%2C GO:0080163
OE9A065905	1.9002	5.11859	1.58576	3.22785	0.00124726	0.0060076	OE9A065905	ID=OE9A065905T1;Parent=OE9A065905;Name=OE9A065905T1;product=OE9A065905P1
OE9A048737	93.1674	5.11814	0.50565	10.1219	4.41765e-24	1.48545e-21	OE9A048737	ID=OE9A048737T1;Parent=OE9A048737;Name=OE9A048737T1;product=OE9A048737P1;Description=AAA-ATPase At2g46620-like;Ontology_term=GO:0005524%2C GO:0016020
OE9A004877	3.63414	5.11557	1.19671	4.2747	1.91398e-05	0.00016044	OE9A004877	ID=OE9A004877T1;Parent=OE9A004877;Name=OE9A004877T1;product=OE9A004877P1;Description=serine decarboxylase;Ontology_term=GO:0016829%2C GO:0044237%2C GO:0044281%2C GO:0044464%2C GO:0044763%2C GO:0071704
OE9A078688	3.84909	5.11051	1.75265	2.91588	0.00354691	0.0144592	OE9A078688	ID=OE9A078688T1;Parent=OE9A078688;Name=OE9A078688T1;product=OE9A078688P1;Description=annexin D3;Ontology_term=GO:0005509%2C GO:0005544
OE9A021481	3.45153	5.10411	1.31253	3.88876	0.000100759	0.000687889	OE9A021481	ID=OE9A021481T1;Parent=OE9A021481;Name=OE9A021481T1;product=OE9A021481P1;Description=homeobox-leucine zipper ROC8 isoform X2;Ontology_term=GO:0005634%2C GO:0006355%2C GO:0043565
OE9A008910	3.51401	5.10272	1.63664	3.11781	0.00182203	0.00825923	OE9A008910	ID=OE9A008910T1;Parent=OE9A008910;Name=OE9A008910T1;product=OE9A008910P1;Description=LIM domain-containing WLIM2b-like;Ontology_term=GO:0008270
OE9A090761	229.879	5.10231	0.76769	6.64632	3.00513e-11	9.92717e-10	OE9A090761	ID=OE9A090761T1;Parent=OE9A090761;Name=OE9A090761T1;product=OE9A090761P1;Description=premnaspirodiene oxygenase-like;Ontology_term=GO:0004497%2C GO:0005506%2C GO:0016705%2C GO:0020037%2C GO:0055114
OE9A112553	1.81673	5.09643	1.94215	2.62412	0.00868736	0.0301084	OE9A112553	ID=OE9A112553T1;Parent=OE9A112553;Name=OE9A112553T1;product=OE9A112553P1
OE9A078997	2.47282	5.09627	1.40813	3.61917	0.000295549	0.00173612	OE9A078997	ID=OE9A078997T1;Parent=OE9A078997;Name=OE9A078997T1;product=OE9A078997P1;Description=agamous-like MADS-box AGL62;Ontology_term=GO:0003677%2C GO:0046983
OE9A003996	1.95089	5.09617	2.39117	2.13124	0.033069	0.0883019	OE9A003996	ID=OE9A003996T1;Parent=OE9A003996;Name=OE9A003996T1;product=OE9A003996P1;Description=uncharacterized protein LOC111379988 isoform X1;Ontology_term=GO:0009507%2C GO:0009579
OE9A023422	3.71559	5.08977	1.36604	3.72593	0.000194597	0.0012115	OE9A023422	ID=OE9A023422T1;Parent=OE9A023422;Name=OE9A023422T1;product=OE9A023422P1;Description=BON1-associated 2-like;Ontology_term=GO:0005515
OE9A003295	2.90312	5.08718	1.35294	3.7601	0.000169849	0.00107588	OE9A003295	ID=OE9A003295T1;Parent=OE9A003295;Name=OE9A003295T1;product=OE9A003295P1;Description=2,3-bisphosphoglycerate-independent phosphoglycerate mutase;Ontology_term=GO:0004619%2C GO:0005737%2C GO:0006007%2C GO:0006094%2C GO:0006096%2C GO:0030145
OE9A091087	3.57585	5.08548	1.91159	2.66034	0.00780625	0.0276302	OE9A091087	ID=OE9A091087T1;Parent=OE9A091087;Name=OE9A091087T1;product=OE9A091087P1;Description=Ulp1 protease family, C-terminal catalytic domain containing;Ontology_term=GO:0006508%2C GO:0008234
OE9A025737	2.68305	5.08014	2.06036	2.46565	0.0136765	0.0437275	OE9A025737	ID=OE9A025737T1;Parent=OE9A025737;Name=OE9A025737T1;product=OE9A025737P1;Description=zinc protease PQQL-like isoform X2;Ontology_term=GO:0003824%2C GO:0009536%2C GO:0016020
OE9A045351	37.2193	5.07855	0.773553	6.56523	5.19529e-11	1.63184e-09	OE9A045351	ID=OE9A045351T1;Parent=OE9A045351;Name=OE9A045351T1;product=OE9A045351P1;Description=gibberellin 2-beta-dioxygenase 2;Ontology_term=GO:0005506%2C GO:0009416%2C GO:0045487%2C GO:0052634%2C GO:0055114
OE9A012945	3.52003	5.07746	1.38563	3.66438	0.000247943	0.00149524	OE9A012945	ID=OE9A012945T1;Parent=OE9A012945;Name=OE9A012945T1;product=OE9A012945P1;Description=ABC transporter C family member 10-like;Ontology_term=GO:0005524%2C GO:0016021%2C GO:0042626%2C GO:0055085
OE9A118390	2.47003	5.07562	2.00311	2.53387	0.011281	0.0373664	OE9A118390	ID=OE9A118390T1;Parent=OE9A118390;Name=OE9A118390T1;product=OE9A118390P1;Description=NRT1 PTR FAMILY -like;Ontology_term=GO:0005215%2C GO:0006810%2C GO:0016021
OE9A064853	3.61246	5.06408	1.77034	2.86052	0.00422943	0.016692	OE9A064853	ID=OE9A064853T1;Parent=OE9A064853;Name=OE9A064853T1;product=OE9A064853P1;Description=endo-1,4-beta-xylanase A-like;Ontology_term=GO:0004553%2C GO:0005975
OE9A117672	241.865	5.05745	0.952847	5.30772	1.11004e-07	1.66319e-06	OE9A117672	ID=OE9A117672T1;Parent=OE9A117672;Name=OE9A117672T1;product=OE9A117672P1;Description=beta-glucosidase-like;Ontology_term=GO:0004553%2C GO:0005975
OE9A067435	5.25438	5.05744	1.23995	4.07875	4.52789e-05	0.000340888	OE9A067435	ID=OE9A067435T1;Parent=OE9A067435;Name=OE9A067435T1;product=OE9A067435P1;Description=probable receptor kinase At4g39110;Ontology_term=GO:0004672%2C GO:0005524%2C GO:0006468
OE9A061082	92.5785	5.05551	0.913036	5.53704	3.07633e-08	5.30617e-07	OE9A061082	ID=OE9A061082T1;Parent=OE9A061082;Name=OE9A061082T1;product=OE9A061082P1
OE9A051868	1.71676	5.05421	2.31842	2.18003	0.0292556	0.0802955	OE9A051868	ID=OE9A051868T1;Parent=OE9A051868;Name=OE9A051868T1;product=OE9A051868P1;Description=CT099, partial;Ontology_term=GO:0006118%2C GO:0009055
OE9A003079	79.7931	5.05147	0.754008	6.69949	2.09151e-11	7.11516e-10	OE9A003079	ID=OE9A003079T1;Parent=OE9A003079;Name=OE9A003079T1;product=OE9A003079P1
OE9A034758	1.72747	5.05079	2.36445	2.13614	0.0326681	0.08748	OE9A034758	ID=OE9A034758T1;Parent=OE9A034758;Name=OE9A034758T1;product=OE9A034758P1;Description=F-box At3g07870-like isoform X1;Ontology_term=GO:0005515
OE9A022634	3.41477	5.05033	1.52342	3.31512	0.000916026	0.00461538	OE9A022634	ID=OE9A022634T1;Parent=OE9A022634;Name=OE9A022634T1;product=OE9A022634P1;Description=cytochrome P450 CYP82D47-like;Ontology_term=GO:0005506%2C GO:0016020%2C GO:0016705%2C GO:0020037%2C GO:0055114
OE9A021554	1.61189	5.04999	1.42281	3.5493	0.000386252	0.00218767	OE9A021554	ID=OE9A021554T1;Parent=OE9A021554;Name=OE9A021554T1;product=OE9A021554P1;Description=casein kinase 1 HD16;Ontology_term=GO:0004674%2C GO:0005524%2C GO:0005634%2C GO:0005737%2C GO:0006897%2C GO:0008360%2C GO:0009069%2C GO:0016055%2C GO:0018105
OE9A062860	2.64696	5.04988	1.50487	3.3557	0.000791648	0.00407221	OE9A062860	ID=OE9A062860T1;Parent=OE9A062860;Name=OE9A062860T1;product=OE9A062860P1
OE9A113199	6.11415	5.04655	1.17197	4.30604	1.66201e-05	0.000141993	OE9A113199	ID=OE9A113199T1;Parent=OE9A113199;Name=OE9A113199T1;product=OE9A113199P1;Description=katanin p60 ATPase-containing subunit A-like 2, partial;Ontology_term=GO:0005524
OE9A062139	2.17867	5.04585	1.84508	2.73476	0.00624265	0.022982	OE9A062139	ID=OE9A062139T1;Parent=OE9A062139;Name=OE9A062139T1;product=OE9A062139P1
OE9A120716	2.06098	5.02825	2.22792	2.25693	0.0240126	0.0687143	OE9A120716	ID=OE9A120716T2;Parent=OE9A120716;Name=OE9A120716T2;product=OE9A120716P2;Description=phospholipid:diacylglycerol acyltransferase 2;Ontology_term=GO:0006629%2C GO:0008374%2C GO:0042967
OE9A106179	1.67802	5.02824	2.27528	2.20995	0.0271089	0.075604	OE9A106179	ID=OE9A106179T1;Parent=OE9A106179;Name=OE9A106179T1;product=OE9A106179P1;Description=receptor kinase At5g39000;Ontology_term=GO:0004672%2C GO:0005524%2C GO:0006468
OE9A076908	1.69829	5.02743	2.31703	2.16978	0.0300239	0.0819309	OE9A076908	ID=OE9A076908T1;Parent=OE9A076908;Name=OE9A076908T1;product=OE9A076908P1;Description=microtubule-associated 70-2-like;Ontology_term=GO:0007010%2C GO:0008017%2C GO:0045298
OE9A003704	3.94038	5.02412	1.20875	4.15647	3.23206e-05	0.00025411	OE9A003704	ID=OE9A003704T1;Parent=OE9A003704;Name=OE9A003704T1;product=OE9A003704P1;Description=cytochrome b561 domain-containing At2g30890-like;Ontology_term=GO:0016020
OE9A115698	2.03772	5.02078	2.25304	2.22845	0.0258508	0.072865	OE9A115698	ID=OE9A115698T1;Parent=OE9A115698;Name=OE9A115698T1;product=OE9A115698P1
OE9A012166	3.81281	5.01955	1.37762	3.64365	0.000268803	0.00160281	OE9A012166	ID=OE9A012166T1;Parent=OE9A012166;Name=OE9A012166T1;product=OE9A012166P1
OE9A055668	32.3889	5.01672	0.654399	7.66615	1.7723e-14	1.17214e-12	OE9A055668	ID=OE9A055668T1;Parent=OE9A055668;Name=OE9A055668T1;product=OE9A055668P1
OE9A090043	1.40391	5.0149	2.20566	2.27366	0.0229867	0.0663503	OE9A090043	ID=OE9A090043T1;Parent=OE9A090043;Name=OE9A090043T1;product=OE9A090043P1
OE9A112283	1.83057	5.01014	2.26066	2.21623	0.0266756	0.0746824	OE9A112283	ID=OE9A112283T1;Parent=OE9A112283;Name=OE9A112283T1;product=OE9A112283P1;Description=MADS-box transcription factor 23-like;Ontology_term=GO:0003677%2C GO:0005634%2C GO:0006355%2C GO:0046983
OE9A031681	2.30754	5.00308	1.69492	2.95181	0.0031592	0.0131164	OE9A031681	ID=OE9A031681T1;Parent=OE9A031681;Name=OE9A031681T1;product=OE9A031681P1;Description=proline-rich receptor kinase PERK1;Ontology_term=GO:0004674%2C GO:0005524%2C GO:0006468%2C GO:0009069%2C GO:0016021
OE9A051497	7.00356	4.99955	0.988075	5.05989	4.19505e-07	5.41004e-06	OE9A051497	ID=OE9A051497T1;Parent=OE9A051497;Name=OE9A051497T1;product=OE9A051497P1;Description=guanosine nucleotide diphosphate dissociation inhibitor At5g09550;Ontology_term=GO:0005093%2C GO:0005622%2C GO:0007264%2C GO:0015031%2C GO:0016491%2C GO:0048046%2C GO:0050790%2C GO:0055114
OE9A010769	1.63516	4.99125	2.07434	2.40618	0.0161202	0.0498782	OE9A010769	ID=OE9A010769T1;Parent=OE9A010769;Name=OE9A010769T1;product=OE9A010769P1;Description=polyadenylate-binding 1;Ontology_term=GO:0000166%2C GO:0003676
OE9A087180	3.14575	4.99028	1.36392	3.65877	0.00025343	0.0015223	OE9A087180	ID=OE9A087180T1;Parent=OE9A087180;Name=OE9A087180T1;product=OE9A087180P1;Description=ketol-acid reductoisomerase, chloroplastic;Ontology_term=GO:0008652%2C GO:0016491%2C GO:0055114
OE9A035252	2.20193	4.98692	1.63472	3.05063	0.0022836	0.00997773	OE9A035252	ID=OE9A035252T1;Parent=OE9A035252;Name=OE9A035252T1;product=OE9A035252P1
OE9A005514	1.80356	4.98655	2.07825	2.3994	0.0164221	0.0506604	OE9A005514	ID=OE9A005514T1;Parent=OE9A005514;Name=OE9A005514T1;product=OE9A005514P1;Description=probable sulfate transporter;Ontology_term=GO:0008271%2C GO:0016021%2C GO:1902358
OE9A011153	3.26361	4.9857	1.52139	3.27707	0.00104891	0.0051842	OE9A011153	ID=OE9A011153T1;Parent=OE9A011153;Name=OE9A011153T1;product=OE9A011153P1
OE9A021642	6.17692	4.98555	1.3706	3.6375	0.000275296	0.0016361	OE9A021642	ID=OE9A021642T1;Parent=OE9A021642;Name=OE9A021642T1;product=OE9A021642P1;Description=premnaspirodiene oxygenase-like;Ontology_term=GO:0005506%2C GO:0016705%2C GO:0020037%2C GO:0055114
OE9A069710	1.56758	4.98549	2.24042	2.22524	0.0260649	0.0733131	OE9A069710	ID=OE9A069710T1;Parent=OE9A069710;Name=OE9A069710T1;product=OE9A069710P1
OE9A042799	1.81208	4.98421	2.0659	2.41261	0.0158385	0.0492118	OE9A042799	ID=OE9A042799T1;Parent=OE9A042799;Name=OE9A042799T1;product=OE9A042799P1
OE9A096712	1.49173	4.98052	2.05992	2.41782	0.0156139	0.0486701	OE9A096712	ID=OE9A096712T1;Parent=OE9A096712;Name=OE9A096712T1;product=OE9A096712P1;Description=heat shock 83;Ontology_term=GO:0005524%2C GO:0005737%2C GO:0006457%2C GO:0006950%2C GO:0051082
OE9mt000051	2.47676	4.98	2.36803	2.10302	0.0354645	0.0932792	OE9mt000051	ID=OE9mt000051T1;Parent=OE9mt000051;product=OE9mt000051P1;Description=ccmC;Name=OE9mt000051T1
OE9A101017	224.881	4.97872	0.644441	7.72564	1.11293e-14	7.59644e-13	OE9A101017	ID=OE9A101017T1;Parent=OE9A101017;Name=OE9A101017T1;product=OE9A101017P1;Description=receptor kinase HAIKU2;Ontology_term=GO:0004674%2C GO:0005515%2C GO:0005524%2C GO:0006468%2C GO:0009069%2C GO:0016021
OE9A058687	18.9869	4.97787	1.12312	4.4322	9.32768e-06	8.49868e-05	OE9A058687	ID=OE9A058687T1;Parent=OE9A058687;Name=OE9A058687T1;product=OE9A058687P1;Description=vetispiradiene synthase 2-like;Ontology_term=GO:0000287%2C GO:0008152%2C GO:0010333
OE9A006782	3.18147	4.97395	1.45756	3.41252	0.000643651	0.00339848	OE9A006782	ID=OE9A006782T1;Parent=OE9A006782;Name=OE9A006782T1;product=OE9A006782P1;Description=uncharacterized protein LOC111375925;Ontology_term=GO:0016021
OE9A107679	54.7673	4.97336	0.603802	8.23675	1.76957e-16	1.79451e-14	OE9A107679	ID=OE9A107679T1;Parent=OE9A107679;Name=OE9A107679T1;product=OE9A107679P1;Description=probable calcium-binding CML44;Ontology_term=GO:0005509
OE9A031523	76.2738	4.97324	0.598077	8.31539	9.14488e-17	9.70512e-15	OE9A031523	ID=OE9A031523T1;Parent=OE9A031523;Name=OE9A031523T1;product=OE9A031523P1;Description=lachrymatory-factor synthase;Ontology_term=GO:0004864%2C GO:0004872%2C GO:0005634%2C GO:0005737%2C GO:0009738%2C GO:0010427%2C GO:0080163
OE9A079271	3.85611	4.96743	1.19499	4.15689	3.22608e-05	0.000253774	OE9A079271	ID=OE9A079271T1;Parent=OE9A079271;Name=OE9A079271T1;product=OE9A079271P1
OE9A100425	2.96116	4.96493	1.47211	3.37267	0.000744431	0.00386417	OE9A100425	ID=OE9A100425T1;Parent=OE9A100425;Name=OE9A100425T1;product=OE9A100425P1;Description=NRT1 PTR FAMILY -like;Ontology_term=GO:0005215%2C GO:0006810%2C GO:0016021
OE9A017759	9.92233	4.96371	0.92215	5.38276	7.33521e-08	1.15313e-06	OE9A017759	ID=OE9A017759T1;Parent=OE9A017759;Name=OE9A017759T1;product=OE9A017759P1;Description=ABC transporter E family member 2;Ontology_term=GO:0005524%2C GO:0016887
OE9A012845	1.44408	4.9611	1.86926	2.65405	0.00795326	0.0280604	OE9A012845	ID=OE9A012845T1;Parent=OE9A012845;Name=OE9A012845T1;product=OE9A012845P1;Description=NRT1 PTR FAMILY -like;Ontology_term=GO:0005215%2C GO:0006810%2C GO:0016021
OE9A048079	1.55401	4.95997	2.17892	2.27635	0.0228252	0.0659845	OE9A048079	ID=OE9A048079T1;Parent=OE9A048079;Name=OE9A048079T1;product=OE9A048079P1;Description=tryptophan aminotransferase-related 2 isoform X1;Ontology_term=GO:0016846
OE9A073420	6.11737	4.95979	1.11086	4.46483	8.01342e-06	7.43265e-05	OE9A073420	ID=OE9A073420T1;Parent=OE9A073420;Name=OE9A073420T1;product=OE9A073420P1;Description=KH domain-containing At4g18375 isoform X1;Ontology_term=GO:0003723
OE9A083345	1.49292	4.95098	1.88965	2.62005	0.00879171	0.0304169	OE9A083345	ID=OE9A083345T1;Parent=OE9A083345;Name=OE9A083345T1;product=OE9A083345P1
OE9A042551	3.08857	4.95047	1.50082	3.29851	0.000971997	0.00485527	OE9A042551	ID=OE9A042551T1;Parent=OE9A042551;Name=OE9A042551T1;product=OE9A042551P1;Description=transcription factor TCP10-like;Ontology_term=GO:2000024
OE9A104198	2.16963	4.94832	1.30002	3.80633	0.000141044	0.000918931	OE9A104198	ID=OE9A104198T1;Parent=OE9A104198;Name=OE9A104198T1;product=OE9A104198P1;Description=SEC12 2;Ontology_term=GO:0005515%2C GO:0016021
OE9A035170	2.27911	4.9467	1.56478	3.16127	0.00157085	0.00728225	OE9A035170	ID=OE9A035170T1;Parent=OE9A035170;Name=OE9A035170T1;product=OE9A035170P1;Description=methanol O-anthraniloyltransferase;Ontology_term=GO:0016747
OE9A043108	2.10067	4.94661	1.86543	2.65173	0.00800806	0.0282158	OE9A043108	ID=OE9A043108T1;Parent=OE9A043108;Name=OE9A043108T1;product=OE9A043108P1
OE9A065860	1.50367	4.94623	2.28242	2.1671	0.0302276	0.082346	OE9A065860	ID=OE9A065860T1;Parent=OE9A065860;Name=OE9A065860T1;product=OE9A065860P1;Description=transcription factor TGA2;Ontology_term=GO:0003700%2C GO:0005667%2C GO:0006355%2C GO:0043565%2C GO:0045449
OE9A036088	30.6574	4.94517	0.900907	5.4891	4.03977e-08	6.82786e-07	OE9A036088	ID=OE9A036088T1;Parent=OE9A036088;Name=OE9A036088T1;product=OE9A036088P1;Description=polygalacturonase inhibitor-like;Ontology_term=GO:0005515
OE9A064157	1.62842	4.94217	2.35267	2.10067	0.0356702	0.0936969	OE9A064157	ID=OE9A064157T1;Parent=OE9A064157;Name=OE9A064157T1;product=OE9A064157P1
OE9A001944	2.57835	4.94123	1.4979	3.29877	0.000971091	0.00485227	OE9A001944	ID=OE9A001944T1;Parent=OE9A001944;Name=OE9A001944T1;product=OE9A001944P1;Description=26S proteasome non-ATPase regulatory subunit 9 isoform X1;Ontology_term=GO:0005515
OE9A051162	1.93528	4.94086	2.11524	2.33584	0.0194998	0.058166	OE9A051162	ID=OE9A051162T1;Parent=OE9A051162;Name=OE9A051162T1;product=OE9A051162P1;Description=chloride channel CLC-f-like;Ontology_term=GO:0005247%2C GO:0005794%2C GO:0006821%2C GO:0009507%2C GO:0016021%2C GO:1903959
OE9A103836	1.80283	4.93803	1.55701	3.17149	0.00151658	0.00707858	OE9A103836	ID=OE9A103836T1;Parent=OE9A103836;Name=OE9A103836T1;product=OE9A103836P1;Description=autophagy-related 18d-like;Ontology_term=GO:0005515
OE9A085294	2.05248	4.93727	2.27797	2.1674	0.0302043	0.0822897	OE9A085294	ID=OE9A085294T1;Parent=OE9A085294;Name=OE9A085294T1;product=OE9A085294P1
OE9A048439	4.29582	4.92933	1.7086	2.88501	0.00391404	0.0156464	OE9A048439	ID=OE9A048439T1;Parent=OE9A048439;Name=OE9A048439T1;product=OE9A048439P1;Description=multidrug resistance;Ontology_term=GO:0005524%2C GO:0016021%2C GO:0042626%2C GO:0055085
OE9A064019	3.79726	4.92863	1.40097	3.51803	0.000434769	0.00241998	OE9A064019	ID=OE9A064019T1;Parent=OE9A064019;Name=OE9A064019T1;product=OE9A064019P1;Description=probable indole-3-pyruvate monooxygenase YUCCA4;Ontology_term=GO:0000139%2C GO:0004499%2C GO:0005654%2C GO:0005789%2C GO:0005829%2C GO:0006568%2C GO:0009851%2C GO:0009911%2C GO:0010229%2C GO:0047434%2C GO:0048825%2C GO:0050660%2C GO:0050661%2C GO:0055114
OE9A034558	73.7869	4.92732	0.505209	9.75302	1.79066e-22	4.53975e-20	OE9A034558	ID=OE9A034558T1;Parent=OE9A034558;Name=OE9A034558T1;product=OE9A034558P1;Description=heavy metal-associated isoprenylated plant 3-like isoform X1;Ontology_term=GO:0030001%2C GO:0046872
OE9A055421	8.47988	4.92193	1.13866	4.32257	1.54225e-05	0.000132934	OE9A055421	ID=OE9A055421T1;Parent=OE9A055421;Name=OE9A055421T1;product=OE9A055421P1;Description=oligopeptide transporter 6;Ontology_term=GO:0016021%2C GO:0055085
OE9A098399	40.8876	4.92075	0.746883	6.58838	4.44646e-11	1.41459e-09	OE9A098399	ID=OE9A098399T1;Parent=OE9A098399;Name=OE9A098399T1;product=OE9A098399P1;Description=ethylene-responsive transcription factor 1A-like;Ontology_term=GO:0003677%2C GO:0003700%2C GO:0005667%2C GO:0006355%2C GO:0045449
OE9A105684	1.51379	4.91817	1.63097	3.01549	0.00256562	0.0110008	OE9A105684	ID=OE9A105684T1;Parent=OE9A105684;Name=OE9A105684T1;product=OE9A105684P1;Description=NBS-LRR class resistance Fy8-Ry8;Ontology_term=GO:0043531
OE9A013904	2.28905	4.91525	1.81372	2.71005	0.0067274	0.0244566	OE9A013904	ID=OE9A013904T1;Parent=OE9A013904;Name=OE9A013904T1;product=OE9A013904P1
OE9A120982	51.9457	4.91464	0.953818	5.1526	2.56902e-07	3.51005e-06	OE9A120982	ID=OE9A120982T1;Parent=OE9A120982;Name=OE9A120982T1;product=OE9A120982P1;Description=premnaspirodiene oxygenase-like;Ontology_term=GO:0004497%2C GO:0005506%2C GO:0016021%2C GO:0016705%2C GO:0020037%2C GO:0055114
OE9A042695	340.291	4.91097	0.77303	6.35289	2.11312e-10	5.79413e-09	OE9A042695	ID=OE9A042695T1;Parent=OE9A042695;Name=OE9A042695T1;product=OE9A042695P1;Description=Branch domain-containing;Ontology_term=GO:0008375%2C GO:0016021
OE9A079070	3.18833	4.9101	1.80749	2.71653	0.00659702	0.024062	OE9A079070	ID=OE9A079070T1;Parent=OE9A079070;Name=OE9A079070T1;product=OE9A079070P1;Description=glycine dehydrogenase (decarboxylating), mitochondrial;Ontology_term=GO:0004375%2C GO:0005739%2C GO:0005829%2C GO:0005960%2C GO:0006563%2C GO:0006566%2C GO:0016594%2C GO:0019464%2C GO:0055114
OE9A089178	34.0946	4.90961	0.804029	6.10626	1.01994e-09	2.40628e-08	OE9A089178	ID=OE9A089178T1;Parent=OE9A089178;Name=OE9A089178T1;product=OE9A089178P1;Description=ethylene-responsive transcription factor ERF114-like;Ontology_term=GO:0003677%2C GO:0003700%2C GO:0005667%2C GO:0006355%2C GO:0045449
OE9A078083	3.1269	4.90844	1.48009	3.31631	0.000912156	0.00459951	OE9A078083	ID=OE9A078083T1;Parent=OE9A078083;Name=OE9A078083T1;product=OE9A078083P1;Description=UDP-glucuronic acid decarboxylase 4-like;Ontology_term=GO:0016021
OE9A041160	1.47399	4.90797	2.23119	2.19971	0.0278275	0.0772371	OE9A041160	ID=OE9A041160T1;Parent=OE9A041160;Name=OE9A041160T1;product=OE9A041160P1;Description=TPR repeat-containing ZIP4;Ontology_term=GO:0000712%2C GO:0005515%2C GO:0007140%2C GO:0007143%2C GO:0009507
OE9A031174	5.26675	4.90236	1.10082	4.45338	8.45306e-06	7.78618e-05	OE9A031174	ID=OE9A031174T1;Parent=OE9A031174;Name=OE9A031174T1;product=OE9A031174P1;Description=ubiquitin carboxyl-terminal hydrolase 2-like;Ontology_term=GO:0006511%2C GO:0008270%2C GO:0016579%2C GO:0036459
OE9A039170	46.8515	4.89466	0.904716	5.41016	6.29691e-08	1.00729e-06	OE9A039170	ID=OE9A039170T1;Parent=OE9A039170;Name=OE9A039170T1;product=OE9A039170P1;Description=DETOXIFICATION 49-like;Ontology_term=GO:0006855%2C GO:0015238%2C GO:0015297%2C GO:0016021
OE9A104518	5.47188	4.89285	1.14473	4.27424	1.91793e-05	0.000160678	OE9A104518	ID=OE9A104518T1;Parent=OE9A104518;Name=OE9A104518T1;product=OE9A104518P1;Description=Iron ascorbate family oxidoreductase;Ontology_term=GO:0016491%2C GO:0055114
OE9A002243	4.34395	4.88994	1.54528	3.16444	0.00155381	0.0072194	OE9A002243	ID=OE9A002243T1;Parent=OE9A002243;Name=OE9A002243T1;product=OE9A002243P1;Description=serine threonine- kinase HT1-like;Ontology_term=GO:0004672%2C GO:0005524%2C GO:0006468
OE9A027604	3.37793	4.88396	1.50327	3.24889	0.00115858	0.00563999	OE9A027604	ID=OE9A027604T1;Parent=OE9A027604;Name=OE9A027604T1;product=OE9A027604P1;Description=NRT1 PTR FAMILY -like;Ontology_term=GO:0005215%2C GO:0006810%2C GO:0016021
OE9A030545	1.37443	4.88207	1.98439	2.46024	0.0138846	0.0442533	OE9A030545	ID=OE9A030545T1;Parent=OE9A030545;Name=OE9A030545T1;product=OE9A030545P1
OE9A041417	2.46136	4.88141	1.5533	3.14261	0.0016745	0.00768204	OE9A041417	ID=OE9A041417T1;Parent=OE9A041417;Name=OE9A041417T1;product=OE9A041417P1
OE9A067112	2.29971	4.88025	1.54814	3.15232	0.00161978	0.0074632	OE9A067112	ID=OE9A067112T1;Parent=OE9A067112;Name=OE9A067112T1;product=OE9A067112P1;Description=superoxide dismutase [Cu-Zn], chloroplastic;Ontology_term=GO:0006801%2C GO:0016491%2C GO:0034599%2C GO:0046872%2C GO:0055114
OE9A033700	2.19389	4.87994	1.91335	2.55047	0.0107579	0.0360069	OE9A033700	ID=OE9A033700T1;Parent=OE9A033700;Name=OE9A033700T1;product=OE9A033700P1
OE9A047030	3.24018	4.87944	1.5929	3.06323	0.00218959	0.00962491	OE9A047030	ID=OE9A047030T1;Parent=OE9A047030;Name=OE9A047030T1;product=OE9A047030P1;Description=homocysteine S-methyltransferase 1;Ontology_term=GO:0005737%2C GO:0006544%2C GO:0006563%2C GO:0006566%2C GO:0008270%2C GO:0008898%2C GO:0009086%2C GO:0032259%2C GO:0047150
OE9A102651	8.42657	4.87763	0.898465	5.42885	5.67189e-08	9.17854e-07	OE9A102651	ID=OE9A102651T1;Parent=OE9A102651;Name=OE9A102651T1;product=OE9A102651P1;Description=metalloendo ase 4-MMP;Ontology_term=GO:0004222%2C GO:0006508%2C GO:0008270%2C GO:0016020%2C GO:0031012
OE9A033449	4.42106	4.87544	1.18541	4.11288	3.90757e-05	0.000299552	OE9A033449	ID=OE9A033449T1;Parent=OE9A033449;Name=OE9A033449T1;product=OE9A033449P1;Description=ubiquitin receptor RAD23c-like;Ontology_term=GO:0003684%2C GO:0005515%2C GO:0005634%2C GO:0006289%2C GO:0016021%2C GO:0043161
OE9A040204	3.08587	4.87349	1.48749	3.27632	0.00105169	0.00519565	OE9A040204	ID=OE9A040204T1;Parent=OE9A040204;Name=OE9A040204T1;product=OE9A040204P1;Description=ABC transporter B family member 9-like;Ontology_term=GO:0000166%2C GO:0006810%2C GO:0016020%2C GO:0016887
OE9A003037	2.90671	4.86969	1.83467	2.65426	0.00794831	0.0280491	OE9A003037	ID=OE9A003037T1;Parent=OE9A003037;Name=OE9A003037T1;product=OE9A003037P1;Description=(-)-germacrene D synthase;Ontology_term=GO:0000287%2C GO:0008152%2C GO:0010333
OE9A044176	1.46609	4.86767	1.98113	2.45701	0.0140097	0.0445566	OE9A044176	ID=OE9A044176T1;Parent=OE9A044176;Name=OE9A044176T1;product=OE9A044176P1
OE9A076410	4.17091	4.86686	1.39714	3.48346	0.000494986	0.0027112	OE9A076410	ID=OE9A076410T1;Parent=OE9A076410;Name=OE9A076410T1;product=OE9A076410P1;Description=unnamed protein product;Ontology_term=GO:0016021
OE9A108062	2.50212	4.86644	2.19993	2.21209	0.0269603	0.075288	OE9A108062	ID=OE9A108062T1;Parent=OE9A108062;Name=OE9A108062T1;product=OE9A108062P1;Description=n-acylphosphatidylethanolamine synthase;Ontology_term=GO:0006644%2C GO:0016746
OE9A067698	143.139	4.86068	0.380442	12.7764	2.22047e-37	5.06647e-34	OE9A067698	ID=OE9A067698T1;Parent=OE9A067698;Name=OE9A067698T1;product=OE9A067698P1;Description=probable inactive receptor kinase At1g48480;Ontology_term=GO:0004672%2C GO:0005515%2C GO:0005524%2C GO:0006468%2C GO:0016020
OE9A095197	2.10518	4.85943	2.22804	2.18104	0.0291807	0.0801537	OE9A095197	ID=OE9A095197T1;Parent=OE9A095197;Name=OE9A095197T1;product=OE9A095197P1;Description=beta-glucosidase-like;Ontology_term=GO:0004553%2C GO:0005975
OE9A017140	1.56316	4.85806	1.67628	2.89812	0.00375407	0.0151357	OE9A017140	ID=OE9A017140T1;Parent=OE9A017140;Name=OE9A017140T1;product=OE9A017140P1
OE9A066532	3.30999	4.85637	1.34322	3.61546	0.000299815	0.00175698	OE9A066532	ID=OE9A066532T1;Parent=OE9A066532;Name=OE9A066532T1;product=OE9A066532P1
OE9A017268	4.65694	4.85563	1.31953	3.67981	0.000233407	0.0014191	OE9A017268	ID=OE9A017268T1;Parent=OE9A017268;Name=OE9A017268T1;product=OE9A017268P1;Description=dihydroxy-acid dehydratase, chloroplastic;Ontology_term=GO:0004160%2C GO:0009097%2C GO:0009098%2C GO:0009099%2C GO:0015940
OE9A056606	545.279	4.85491	0.518037	9.37174	7.13432e-21	1.3812e-18	OE9A056606	ID=OE9A056606T1;Parent=OE9A056606;Name=OE9A056606T1;product=OE9A056606P1;Description=arginine decarboxylase-like;Ontology_term=GO:0006527%2C GO:0006560%2C GO:0008295%2C GO:0008792
OE9A047720	4.597	4.85344	1.76117	2.75581	0.00585474	0.0218129	OE9A047720	ID=OE9A047720T1;Parent=OE9A047720;Name=OE9A047720T1;product=OE9A047720P1;Description=beta-amyrin 28-oxidase-like;Ontology_term=GO:0004497%2C GO:0005506%2C GO:0007275%2C GO:0010268%2C GO:0016021%2C GO:0016125%2C GO:0016132%2C GO:0016705%2C GO:0020037%2C GO:0055114
OE9A000556	20.933	4.85213	0.722829	6.71269	1.91066e-11	6.57696e-10	OE9A000556	ID=OE9A000556T1;Parent=OE9A000556;Name=OE9A000556T1;product=OE9A000556P1;Description=LEAF RUST 10 DISEASE-RESISTANCE LOCUS RECEPTOR-LIKE PROTEIN KINASE-like;Ontology_term=GO:0030247
OE9A026806	1.36888	4.84931	2.18765	2.21668	0.0266453	0.0746301	OE9A026806	ID=OE9A026806T1;Parent=OE9A026806;Name=OE9A026806T1;product=OE9A026806P1;Description=nuclear transcription factor Y subunit B-6-like;Ontology_term=GO:0009738%2C GO:0033613%2C GO:0045893%2C GO:0046982
OE9A035095	3.3323	4.84687	1.52456	3.1792	0.00147683	0.00692031	OE9A035095	ID=OE9A035095T1;Parent=OE9A035095;Name=OE9A035095T1;product=OE9A035095P1;Description=F-box SNE-like;Ontology_term=GO:0005515
OE9A039661	8.32942	4.84294	0.914425	5.29615	1.18268e-07	1.76457e-06	OE9A039661	ID=OE9A039661T1;Parent=OE9A039661;Name=OE9A039661T1;product=OE9A039661P1;Description=acyl- -binding domain-containing 4;Ontology_term=GO:0000062
OE9A028685	99.388	4.84236	0.72563	6.67331	2.501e-11	8.40968e-10	OE9A028685	ID=OE9A028685T1;Parent=OE9A028685;Name=OE9A028685T1;product=OE9A028685P1;Description=aquaporin NIP1-1-like;Ontology_term=GO:0005887%2C GO:0006833%2C GO:0009992%2C GO:0015250%2C GO:0015254%2C GO:0015793%2C GO:0034220
OE9A091509	3.54833	4.83728	1.38683	3.48801	0.000486622	0.00267228	OE9A091509	ID=OE9A091509T1;Parent=OE9A091509;Name=OE9A091509T1;product=OE9A091509P1;Description=ethylene-responsive transcription factor ERF039-like;Ontology_term=GO:0003677%2C GO:0003700%2C GO:0005667%2C GO:0006355%2C GO:0045449
OE9A093289	13.8615	4.83369	0.659862	7.3253	2.38372e-13	1.22815e-11	OE9A093289	ID=OE9A093289T1;Parent=OE9A093289;Name=OE9A093289T1;product=OE9A093289P1;Description=SAR DEFICIENT 1;Ontology_term=GO:0005516%2C GO:0006950
OE9A107057	1.96726	4.8335	1.57563	3.06766	0.00215742	0.0095123	OE9A107057	ID=OE9A107057T1;Parent=OE9A107057;Name=OE9A107057T1;product=OE9A107057P1;Description=protein DMP7-like;Ontology_term=GO:0016021
OE9A020127	3.27865	4.83335	1.40269	3.44577	0.000569445	0.00305309	OE9A020127	ID=OE9A020127T1;Parent=OE9A020127;Name=OE9A020127T1;product=OE9A020127P1;Description=receptor kinase 1;Ontology_term=GO:0000166%2C GO:0004674%2C GO:0005886%2C GO:0006468%2C GO:0009069
OE9A101951	2.63949	4.83074	2.14461	2.2525	0.0242907	0.0692433	OE9A101951	ID=OE9A101951T1;Parent=OE9A101951;Name=OE9A101951T1;product=OE9A101951P1;Description=vinorine synthase-like;Ontology_term=GO:0016747
OE9A082461	19492.3	4.8293	0.584157	8.26712	1.37232e-16	1.40504e-14	OE9A082461	ID=OE9A082461T1;Parent=OE9A082461;Name=OE9A082461T1;product=OE9A082461P1
OE9A061534	1.80257	4.82643	1.89401	2.54826	0.0108261	0.036167	OE9A061534	ID=OE9A061534T1;Parent=OE9A061534;Name=OE9A061534T1;product=OE9A061534P1
OE9A120095	5.94003	4.82582	1.20321	4.01079	6.05153e-05	0.000440141	OE9A120095	ID=OE9A120095T1;Parent=OE9A120095;Name=OE9A120095T1;product=OE9A120095P1;Description=disease resistance RGA3;Ontology_term=GO:0005515
OE9A039532	1.46937	4.82091	1.70167	2.83305	0.00461064	0.0179569	OE9A039532	ID=OE9A039532T1;Parent=OE9A039532;Name=OE9A039532T1;product=OE9A039532P1;Description=At1g04360, partial;Ontology_term=GO:0005515%2C GO:0008270
OE9A102789	2.03441	4.82003	1.71965	2.80291	0.00506434	0.0193696	OE9A102789	ID=OE9A102789T1;Parent=OE9A102789;Name=OE9A102789T1;product=OE9A102789P1;Description=probable inactive purple acid phosphatase 27;Ontology_term=GO:0003993%2C GO:0006771%2C GO:0016311%2C GO:0019497%2C GO:0046872
OE9A036072	3.63681	4.81768	1.24471	3.87054	0.000108596	0.000734175	OE9A036072	ID=OE9A036072T1;Parent=OE9A036072;Name=OE9A036072T1;product=OE9A036072P1;Description=actin-depolymerizing factor;Ontology_term=GO:0003779%2C GO:0015629%2C GO:0030042
OE9A049747	3.98618	4.81421	1.25514	3.83559	0.000125265	0.000831001	OE9A049747	ID=OE9A049747T1;Parent=OE9A049747;Name=OE9A049747T1;product=OE9A049747P1;Description=;Ontology_term=GO:0004672%2C GO:0005524%2C GO:0006468
OE9A011244	612.511	4.81071	0.432791	11.1156	1.0539e-28	7.82922e-26	OE9A011244	ID=OE9A011244T1;Parent=OE9A011244;Name=OE9A011244T1;product=OE9A011244P1;Description=SNAP25 homologous SNAP33-like;Ontology_term=GO:0005515
OE9A065742	229.843	4.81039	0.500032	9.62017	6.5721e-22	1.49957e-19	OE9A065742	ID=OE9A065742T1;Parent=OE9A065742;Name=OE9A065742T1;product=OE9A065742P1;Description=cytochrome P450 CYP72A219-like;Ontology_term=GO:0004497%2C GO:0005506%2C GO:0016021%2C GO:0016705%2C GO:0020037%2C GO:0055114
OE9A037284	1.38368	4.80749	2.2646	2.12289	0.0337634	0.0897585	OE9A037284	ID=OE9A037284T1;Parent=OE9A037284;Name=OE9A037284T1;product=OE9A037284P1;Description=G-type lectin S-receptor-like serine threonine- kinase At4g03230 isoform X1;Ontology_term=GO:0004672%2C GO:0006468
OE9A010452	3.38234	4.80533	1.89723	2.53281	0.0113153	0.0374643	OE9A010452	ID=OE9A010452T1;Parent=OE9A010452;Name=OE9A010452T1;product=OE9A010452P1
OE9A092124	3.27429	4.80506	1.32657	3.62218	0.000292133	0.0017189	OE9A092124	ID=OE9A092124T1;Parent=OE9A092124;Name=OE9A092124T1;product=OE9A092124P1;Description=death-associated inhibitor of apoptosis 1-like isoform X2;Ontology_term=GO:0005515%2C GO:0008270
OE9A106067	1.88962	4.80472	2.04062	2.35454	0.0185455	0.0558515	OE9A106067	ID=OE9A106067T1;Parent=OE9A106067;Name=OE9A106067T1;product=OE9A106067P1;Description=Xyloglucan endotransglucosylase hydrolase 2;Ontology_term=GO:0004553%2C GO:0005618%2C GO:0010411%2C GO:0016762%2C GO:0042546%2C GO:0048046%2C GO:0071555
OE9A066301	385.6	4.80275	0.683613	7.02554	2.13236e-12	9.10643e-11	OE9A066301	ID=OE9A066301T1;Parent=OE9A066301;Name=OE9A066301T1;product=OE9A066301P1;Description=premnaspirodiene oxygenase-like;Ontology_term=GO:0004497%2C GO:0005506%2C GO:0016021%2C GO:0016705%2C GO:0020037%2C GO:0055114
OE9A104642	1.52816	4.79816	2.1282	2.25457	0.0241606	0.0690143	OE9A104642	ID=OE9A104642T1;Parent=OE9A104642;Name=OE9A104642T1;product=OE9A104642P1;Description=U-box domain-containing 1-like;Ontology_term=GO:0004842%2C GO:0005515%2C GO:0005634%2C GO:0005737%2C GO:0016567%2C GO:0016874
OE9A047263	1.35349	4.79714	2.12719	2.25515	0.0241238	0.0689584	OE9A047263	ID=OE9A047263T1;Parent=OE9A047263;Name=OE9A047263T1;product=OE9A047263P1
OE9A121887	1.8582	4.79693	1.49349	3.21189	0.00131865	0.0062936	OE9A121887	ID=OE9A121887T1;Parent=OE9A121887;Name=OE9A121887T1;product=OE9A121887P1;Description=ABC transporter G family member 17-like;Ontology_term=GO:0005524%2C GO:0005886%2C GO:0016021%2C GO:0042626%2C GO:0055085
OE9A070761	69204.1	4.79401	0.611874	7.83496	4.68983e-15	3.43605e-13	OE9A070761	ID=OE9A070761T1;Parent=OE9A070761;Name=OE9A070761T1;product=OE9A070761P1
OE9A093107	1.28539	4.79282	2.14277	2.23674	0.0253031	0.0715833	OE9A093107	ID=OE9A093107T1;Parent=OE9A093107;Name=OE9A093107T1;product=OE9A093107P1;Description=cytosolic sulfotransferase 5-like;Ontology_term=GO:0008146
OE9A034988	1.65112	4.79185	2.10448	2.27698	0.0227874	0.065911	OE9A034988	ID=OE9A034988T1;Parent=OE9A034988;Name=OE9A034988T1;product=OE9A034988P1
OE9A076057	3.47866	4.79136	1.44244	3.3217	0.000894706	0.00452223	OE9A076057	ID=OE9A076057T1;Parent=OE9A076057;Name=OE9A076057T1;product=OE9A076057P1;Description=ethylene-responsive transcription factor ERF039-like;Ontology_term=GO:0003677%2C GO:0003700%2C GO:0005667%2C GO:0006355%2C GO:0045449
OE9A049180	5.61925	4.79067	1.55009	3.09057	0.00199775	0.00890913	OE9A049180	ID=OE9A049180T1;Parent=OE9A049180;Name=OE9A049180T1;product=OE9A049180P1;Description=late blight resistance homolog R1A-10 isoform X1;Ontology_term=GO:0043531
OE9A067299	1.69135	4.78932	2.26793	2.11176	0.0347074	0.0917715	OE9A067299	ID=OE9A067299T1;Parent=OE9A067299;Name=OE9A067299T1;product=OE9A067299P1;Description=pre-transcript-splicing factor ATP-dependent RNA helicase DEAH7;Ontology_term=GO:0000398%2C GO:0004004%2C GO:0005524%2C GO:0005681%2C GO:0005737%2C GO:0044822
OE9A035927	1.46166	4.78759	1.87788	2.54946	0.0107889	0.036088	OE9A035927	ID=OE9A035927T1;Parent=OE9A035927;Name=OE9A035927T1;product=OE9A035927P1;Description=cytochrome P450 71A6-like;Ontology_term=GO:0005506%2C GO:0016021%2C GO:0016709%2C GO:0020037%2C GO:0044550%2C GO:0055114
OE9A008731	8.64759	4.78178	1.5121	3.16234	0.00156509	0.00726042	OE9A008731	ID=OE9A008731T1;Parent=OE9A008731;Name=OE9A008731T1;product=OE9A008731P1;Description=crocetin glucosyltransferase, chloroplastic-like;Ontology_term=GO:0005215%2C GO:0006810%2C GO:0008152%2C GO:0009507%2C GO:0016020%2C GO:0016758
OE9A065464	1.39172	4.78105	2.26712	2.10886	0.0349563	0.0922847	OE9A065464	ID=OE9A065464T1;Parent=OE9A065464;Name=OE9A065464T1;product=OE9A065464P1
OE9A097728	1.61296	4.78086	1.85117	2.58262	0.0098054	0.0332686	OE9A097728	ID=OE9A097728T1;Parent=OE9A097728;Name=OE9A097728T1;product=OE9A097728P1;Description=ABC transporter G family member 36-like;Ontology_term=GO:0005524%2C GO:0005886%2C GO:0016021%2C GO:0042626%2C GO:0055085
OE9A010180	1.2916	4.77872	1.6841	2.83755	0.00454609	0.0177314	OE9A010180	ID=OE9A010180T1;Parent=OE9A010180;Name=OE9A010180T1;product=OE9A010180P1;Description=SRC2 homolog;Ontology_term=GO:0005515
OE9A092969	5.11696	4.77802	1.07866	4.42958	9.44154e-06	8.59016e-05	OE9A092969	ID=OE9A092969T1;Parent=OE9A092969;Name=OE9A092969T1;product=OE9A092969P1;Description=probable leucine-rich repeat receptor kinase At1g68400;Ontology_term=GO:0004672%2C GO:0005524%2C GO:0006468%2C GO:0016020
OE9A026039	5.57413	4.77542	1.48545	3.2148	0.00130535	0.00624036	OE9A026039	ID=OE9A026039T1;Parent=OE9A026039;Name=OE9A026039T1;product=OE9A026039P1;Description=calcium uniporter 4, mitochondrial-like;Ontology_term=GO:0006810%2C GO:0015292%2C GO:0016021
OE9A037501	3.08218	4.76841	1.27677	3.73473	0.000187917	0.00117633	OE9A037501	ID=OE9A037501T1;Parent=OE9A037501;Name=OE9A037501T1;product=OE9A037501P1;Description=peroxidase 25;Ontology_term=GO:0004601%2C GO:0006804%2C GO:0006979%2C GO:0009987%2C GO:0020037%2C GO:0055114
OE9A091608	1.42732	4.76823	2.15387	2.21379	0.0268429	0.0750673	OE9A091608	ID=OE9A091608T1;Parent=OE9A091608;Name=OE9A091608T1;product=OE9A091608P1
OE9A117458	2.22768	4.76298	1.40196	3.39738	0.000680354	0.00356751	OE9A117458	ID=OE9A117458T1;Parent=OE9A117458;Name=OE9A117458T1;product=OE9A117458P1;Description=probable transcription factor 21;Ontology_term=GO:0003700%2C GO:0005667%2C GO:0006355%2C GO:0043565%2C GO:0045449
OE9A104881	1.45128	4.76094	2.07544	2.29395	0.0217935	0.0636411	OE9A104881	ID=OE9A104881T1;Parent=OE9A104881;Name=OE9A104881T1;product=OE9A104881P1
OE9A045658	1.77221	4.75955	2.287	2.08114	0.0374214	0.0971704	OE9A045658	ID=OE9A045658T1;Parent=OE9A045658;Name=OE9A045658T1;product=OE9A045658P1
OE9A004561	2.28855	4.75438	1.62902	2.91855	0.00351663	0.0143523	OE9A004561	ID=OE9A004561T1;Parent=OE9A004561;Name=OE9A004561T1;product=OE9A004561P1;Description=E3 ubiquitin- ligase RHA2B-like;Ontology_term=GO:0005515%2C GO:0008270%2C GO:0016020
OE9A095889	43.4736	4.7542	0.597513	7.95663	1.76782e-15	1.43328e-13	OE9A095889	ID=OE9A095889T1;Parent=OE9A095889;Name=OE9A095889T1;product=OE9A095889P1;Description=glutathione transferase GST 23-like;Ontology_term=GO:0004364%2C GO:0005515%2C GO:0005737%2C GO:0006749%2C GO:0006803%2C GO:0009407
OE9A101474	53.5882	4.75327	0.984979	4.82575	1.39476e-06	1.57102e-05	OE9A101474	ID=OE9A101474T1;Parent=OE9A101474;Name=OE9A101474T1;product=OE9A101474P1;Description=ubiquinol oxidase 2, mitochondrial-like isoform X2;Ontology_term=GO:0006118%2C GO:0009916%2C GO:0016021%2C GO:0046872%2C GO:0055114%2C GO:0070469
OE9A063061	1.97571	4.7523	1.87597	2.53324	0.0113012	0.0374255	OE9A063061	ID=OE9A063061T1;Parent=OE9A063061;Name=OE9A063061T1;product=OE9A063061P1;Description=WD repeat-containing YMR102C-like isoform X1;Ontology_term=GO:0005515
OE9A098085	265.477	4.74482	0.589069	8.05479	7.96177e-16	7.06474e-14	OE9A098085	ID=OE9A098085T1;Parent=OE9A098085;Name=OE9A098085T1;product=OE9A098085P1;Description=receptor kinase 5;Ontology_term=GO:0004672%2C GO:0005515%2C GO:0005524%2C GO:0006468%2C GO:0016020
OE9A068420	1.65613	4.7431	1.48879	3.18588	0.00144315	0.00679439	OE9A068420	ID=OE9A068420T1;Parent=OE9A068420;Name=OE9A068420T1;product=OE9A068420P1
OE9A095668	297.138	4.73715	0.801919	5.90727	3.47825e-09	7.25256e-08	OE9A095668	ID=OE9A095668T1;Parent=OE9A095668;Name=OE9A095668T1;product=OE9A095668P1;Description=premnaspirodiene oxygenase-like;Ontology_term=GO:0004497%2C GO:0005506%2C GO:0016021%2C GO:0016705%2C GO:0020037%2C GO:0055114
OE9A057909	2.52728	4.73614	1.57213	3.01256	0.00259052	0.0110883	OE9A057909	ID=OE9A057909T1;Parent=OE9A057909;Name=OE9A057909T1;product=OE9A057909P1;Description=NEP1-interacting -like 1;Ontology_term=GO:0005515%2C GO:0008270%2C GO:0016021
OE9A090979	1.15189	4.73582	2.27105	2.0853	0.0370422	0.0964365	OE9A090979	ID=OE9A090979T1;Parent=OE9A090979;Name=OE9A090979T1;product=OE9A090979P1;Description=terpene synthase 10-like;Ontology_term=GO:0000287%2C GO:0010333
OE9A080521	2.27522	4.73478	1.30646	3.62414	0.000289923	0.00170873	OE9A080521	ID=OE9A080521T1;Parent=OE9A080521;Name=OE9A080521T1;product=OE9A080521P1;Description=serine hydroxymethyltransferase 3, chloroplastic-like;Ontology_term=GO:0004372%2C GO:0006544%2C GO:0006563%2C GO:0030170%2C GO:0035999
OE9A003305	3.22348	4.73026	1.38669	3.41118	0.000646831	0.00341414	OE9A003305	ID=OE9A003305T1;Parent=OE9A003305;Name=OE9A003305T1;product=OE9A003305P1
OE9A044735	1.73577	4.72827	2.24753	2.10376	0.0353993	0.093131	OE9A044735	ID=OE9A044735T1;Parent=OE9A044735;Name=OE9A044735T1;product=OE9A044735P1;md5=07d0f2f4dfb9acb2b7c46c4c0bc8029f;INTERPRO=<table><tr><th>DB</th><th>ID</th><th>Description</th></tr><tr><td>PANTHER</td><td>PTHR12758</td><td></td></tr><tr><td>PANTHER</td><td>PTHR12758:SF20</td><td></td></tr></table>;Description=Signaling mucin HKR1
OE9A048126	6931.49	4.72628	0.641436	7.36828	1.72845e-13	9.24849e-12	OE9A048126	ID=OE9A048126T1;Parent=OE9A048126;Name=OE9A048126T1;product=OE9A048126P1
OE9A046567	3.0523	4.71874	1.55785	3.029	0.00245363	0.0105989	OE9A046567	ID=OE9A046567T1;Parent=OE9A046567;Name=OE9A046567T1;product=OE9A046567P1;Description=WAT1-related At2g39510-like;Ontology_term=GO:0016021
OE9A050757	4.19679	4.71543	1.20124	3.92548	8.65578e-05	0.000600925	OE9A050757	ID=OE9A050757T1;Parent=OE9A050757;Name=OE9A050757T1;product=OE9A050757P1;Description=argonaute MEL1-like;Ontology_term=GO:0003676
OE9A045323	2.14484	4.71235	1.87317	2.5157	0.0118795	0.0390088	OE9A045323	ID=OE9A045323T1;Parent=OE9A045323;Name=OE9A045323T1;product=OE9A045323P1;Description=G-type lectin S-receptor-like serine threonine- kinase At2g19130;Ontology_term=GO:0004672%2C GO:0005524%2C GO:0006468%2C GO:0048544
OE9A072772	1.46932	4.71051	2.19646	2.14459	0.0319853	0.0860339	OE9A072772	ID=OE9A072772T1;Parent=OE9A072772;Name=OE9A072772T1;product=OE9A072772P1;Description=phospholipase D delta-like;Ontology_term=GO:0004630%2C GO:0005509%2C GO:0005515%2C GO:0009395%2C GO:0016020%2C GO:0046470%2C GO:0070290
OE9A014934	3.03631	4.70953	1.19471	3.942	8.08041e-05	0.000566426	OE9A014934	ID=OE9A014934T1;Parent=OE9A014934;Name=OE9A014934T1;product=OE9A014934P1;Description=actin;Ontology_term=GO:0005524
OE9A072475	2.75629	4.70687	1.75524	2.68161	0.00732699	0.0262745	OE9A072475	ID=OE9A072475T1;Parent=OE9A072475;Name=OE9A072475T1;product=OE9A072475P1;Description=eukaryotic translation initiation factor 5A;Ontology_term=GO:0003743%2C GO:0003746%2C GO:0005840%2C GO:0006446%2C GO:0006452%2C GO:0043022%2C GO:0045901%2C GO:0045905
OE9A058073	2.02217	4.70536	1.68211	2.7973	0.00515324	0.0196649	OE9A058073	ID=OE9A058073T1;Parent=OE9A058073;Name=OE9A058073T1;product=OE9A058073P1;Description=probable inactive receptor kinase RLK902;Ontology_term=GO:0004672%2C GO:0005524%2C GO:0006468
OE9A086178	2.16026	4.7048	1.88072	2.50159	0.0123636	0.0402839	OE9A086178	ID=OE9A086178T1;Parent=OE9A086178;Name=OE9A086178T1;product=OE9A086178P1;md5=39c370a093a866fc5a90801b362d6ee6;INTERPRO=<table><tr><th>DB</th><th>ID</th><th>Description</th></tr><tr><td>Coils</td><td>Coil</td><td></td></tr><tr><td>PANTHER</td><td>PTHR13140</td><td></td></tr><tr><td>PANTHER</td><td>PTHR13140:SF390</td><td></td></tr><tr><td>Pfam</td><td>PF00612</td><td>IQ calmodulin-binding motif</t…
OE9A089987	2.57965	4.70393	1.74831	2.69056	0.0071332	0.025666	OE9A089987	ID=OE9A089987T1;Parent=OE9A089987;Name=OE9A089987T1;product=OE9A089987P1
OE9A114120	1.1964	4.70245	2.08005	2.26074	0.0237756	0.0681555	OE9A114120	ID=OE9A114120T1;Parent=OE9A114120;Name=OE9A114120T1;product=OE9A114120P1;Description=auxin-responsive SAUR71-like;Ontology_term=GO:0009733
OE9A023241	4.59941	4.70193	1.46484	3.20986	0.00132801	0.00632882	OE9A023241	ID=OE9A023241T1;Parent=OE9A023241;Name=OE9A023241T1;product=OE9A023241P1;Description=Ankyrin repeat;Ontology_term=GO:0005515
OE9A063019	1.92366	4.70157	2.01003	2.33906	0.0193324	0.0577964	OE9A063019	ID=OE9A063019T1;Parent=OE9A063019;Name=OE9A063019T1;product=OE9A063019P1
OE9A000019	12355.2	4.70034	0.59283	7.92866	2.21532e-15	1.75598e-13	OE9A000019	ID=OE9A000019T1;Parent=OE9A000019;Name=OE9A000019T1;product=OE9A000019P1
OE9A001305	1.31803	4.69723	1.90833	2.46143	0.0138383	0.0441476	OE9A001305	ID=OE9A001305T1;Parent=OE9A001305;Name=OE9A001305T1;product=OE9A001305P1;Description=scarecrow 18;Ontology_term=GO:0003700%2C GO:0005634%2C GO:0005667%2C GO:0006355%2C GO:0010014%2C GO:0010223%2C GO:0043565%2C GO:0045449
OE9A079626	1.84747	4.69052	2.20765	2.12467	0.0336143	0.0894736	OE9A079626	ID=OE9A079626T1;Parent=OE9A079626;Name=OE9A079626T1;product=OE9A079626P1
OE9A025072	1.30808	4.68871	2.25339	2.08074	0.0374576	0.0972247	OE9A025072	ID=OE9A025072T1;Parent=OE9A025072;Name=OE9A025072T1;product=OE9A025072P1
OE9A001549	2.61612	4.68576	1.58739	2.95187	0.00315854	0.0131153	OE9A001549	ID=OE9A001549T1;Parent=OE9A001549;Name=OE9A001549T1;product=OE9A001549P1
OE9A071060	4.2519	4.68467	1.24032	3.77699	0.000158733	0.00101574	OE9A071060	ID=OE9A071060T1;Parent=OE9A071060;Name=OE9A071060T1;product=OE9A071060P1;Description=nuclear transcription factor Y subunit B-3-like;Ontology_term=GO:0005634%2C GO:0006355%2C GO:0043565%2C GO:0046982
OE9A081125	4.67452	4.68278	1.18748	3.94346	8.03149e-05	0.000563369	OE9A081125	ID=OE9A081125T1;Parent=OE9A081125;Name=OE9A081125T1;product=OE9A081125P1
OE9A112728	5.70231	4.67869	1.19625	3.91112	9.18688e-05	0.000633015	OE9A112728	ID=OE9A112728T1;Parent=OE9A112728;Name=OE9A112728T1;product=OE9A112728P1;Description=G-type lectin S-receptor-like serine threonine- kinase RLK1;Ontology_term=GO:0003676%2C GO:0004674%2C GO:0005524%2C GO:0006468%2C GO:0009069%2C GO:0016021
OE9A002422	10.1298	4.67717	0.96107	4.86662	1.13521e-06	1.30443e-05	OE9A002422	ID=OE9A002422T1;Parent=OE9A002422;Name=OE9A002422T1;product=OE9A002422P1;Description=butyrate-- ligase AAE11, peroxisomal-like;Ontology_term=GO:0008152%2C GO:0016874
OE9A101620	4.00693	4.67615	1.37517	3.40042	0.000672825	0.00353499	OE9A101620	ID=OE9A101620T1;Parent=OE9A101620;Name=OE9A101620T1;product=OE9A101620P1
OE9A084455	2.66967	4.67238	1.29785	3.60011	0.000318083	0.00184911	OE9A084455	ID=OE9A084455T1;Parent=OE9A084455;Name=OE9A084455T1;product=OE9A084455P1;Description=germin 2-1;Ontology_term=GO:0005576%2C GO:0030145%2C GO:0045735
OE9A030465	4.21884	4.67056	1.42355	3.28092	0.00103469	0.00512199	OE9A030465	ID=OE9A030465T1;Parent=OE9A030465;Name=OE9A030465T1;product=OE9A030465P1;Description=plastid transcriptionally active 16, chloroplastic;Ontology_term=GO:0009295%2C GO:0009534%2C GO:0016020
OE9A065254	2.554	4.66823	1.65066	2.82809	0.00468263	0.0181857	OE9A065254	ID=OE9A065254T1;Parent=OE9A065254;Name=OE9A065254T1;product=OE9A065254P1;Description=calcium-transporting ATPase 12, plasma membrane-type-like;Ontology_term=GO:0000166%2C GO:0046872
OE9A001133	3401.47	4.66785	0.514157	9.07866	1.0992e-19	1.80066e-17	OE9A001133	ID=OE9A001133T1;Parent=OE9A001133;Name=OE9A001133T1;product=OE9A001133P1
OE9A064716	4.88724	4.66719	1.37629	3.39114	0.000696032	0.00364194	OE9A064716	ID=OE9A064716T1;Parent=OE9A064716;Name=OE9A064716T1;product=OE9A064716P1;Description=histidine-containing phosphotransfer 4;Ontology_term=GO:0000160%2C GO:0005634%2C GO:0005737%2C GO:0009736%2C GO:0009927%2C GO:0016021%2C GO:0016310%2C GO:0043424
OE9A073391	2.62486	4.66691	1.86878	2.4973	0.0125141	0.0406954	OE9A073391	ID=OE9A073391T1;Parent=OE9A073391;Name=OE9A073391T1;product=OE9A073391P1;Description=DETOXIFICATION 53;Ontology_term=GO:0006855%2C GO:0015238%2C GO:0015297%2C GO:0016021
OE9A097078	11.3142	4.65999	0.798951	5.83264	5.45586e-09	1.09819e-07	OE9A097078	ID=OE9A097078T1;Parent=OE9A097078;Name=OE9A097078T1;product=OE9A097078P1
OE9A054767	1.528	4.65349	2.04901	2.27109	0.0231413	0.0667352	OE9A054767	ID=OE9A054767T1;Parent=OE9A054767;Name=OE9A054767T1;product=OE9A054767P1;Description=tryptophan synthase beta chain 1;Ontology_term=GO:0000162%2C GO:0004834%2C GO:0005737%2C GO:0006571%2C GO:0009094%2C GO:0030170%2C GO:0032440%2C GO:0055114
OE9A105388	4.26274	4.6521	1.21639	3.82451	0.000131033	0.000863394	OE9A105388	ID=OE9A105388T1;Parent=OE9A105388;Name=OE9A105388T1;product=OE9A105388P1
OE9A068808	1.26767	4.65122	2.08909	2.22644	0.0259848	0.0731588	OE9A068808	ID=OE9A068808T1;Parent=OE9A068808;Name=OE9A068808T1;product=OE9A068808P1;Description=Ubiquitin-- ligase;Ontology_term=GO:0005515%2C GO:0008270
OE9A020912	1.57227	4.65046	2.0043	2.32025	0.0203276	0.0602081	OE9A020912	ID=OE9A020912T1;Parent=OE9A020912;Name=OE9A020912T1;product=OE9A020912P1
OE9A040702	3.34497	4.64988	1.25831	3.69533	0.0002196	0.00134591	OE9A040702	ID=OE9A040702T1;Parent=OE9A040702;Name=OE9A040702T1;product=OE9A040702P1
OE9A012965	7.00139	4.64899	0.954269	4.87178	1.10597e-06	1.27358e-05	OE9A012965	ID=OE9A012965T1;Parent=OE9A012965;Name=OE9A012965T1;product=OE9A012965P1;Description=alpha carbonic anhydrase 7;Ontology_term=GO:0004089%2C GO:0006730%2C GO:0006807%2C GO:0008270
OE9A013426	1.95031	4.6394	2.03518	2.2796	0.0226313	0.0655602	OE9A013426	ID=OE9A013426T1;Parent=OE9A013426;Name=OE9A013426T1;product=OE9A013426P1
OE9A066685	2.93814	4.63925	1.68606	2.75153	0.00593173	0.0220534	OE9A066685	ID=OE9A066685T1;Parent=OE9A066685;Name=OE9A066685T1;product=OE9A066685P1;Description=UDP-glycosyltransferase 83A1-like;Ontology_term=GO:0009813%2C GO:0043231%2C GO:0052696%2C GO:0080043%2C GO:0080044
OE9A004824	12.9649	4.63257	1.03517	4.47517	7.63514e-06	7.12316e-05	OE9A004824	ID=OE9A004824T1;Parent=OE9A004824;Name=OE9A004824T1;product=OE9A004824P1;Description=Isopenicillin N synthase;Ontology_term=GO:0005506%2C GO:0016491%2C GO:0055114
OE9A071941	10.6844	4.62598	1.68338	2.74803	0.0059955	0.0222569	OE9A071941	ID=OE9A071941T1;Parent=OE9A071941;Name=OE9A071941T1;product=OE9A071941P1;Description=TIFY 5A-like;Ontology_term=GO:0050789
OE9A040941	1.92135	4.62585	1.64624	2.80994	0.00495502	0.019029	OE9A040941	ID=OE9A040941T1;Parent=OE9A040941;Name=OE9A040941T1;product=OE9A040941P1;Description=BEL1-like homeodomain 3;Ontology_term=GO:0003677%2C GO:0006355
OE9A032078	2.28084	4.62582	1.85763	2.49018	0.0127678	0.0413689	OE9A032078	ID=OE9A032078T1;Parent=OE9A032078;Name=OE9A032078T1;product=OE9A032078P1;Description=mavicyanin-like;Ontology_term=GO:0006118%2C GO:0009055%2C GO:0016020
OE9A072831	1.67396	4.62581	1.73427	2.6673	0.00764638	0.0271909	OE9A072831	ID=OE9A072831T1;Parent=OE9A072831;Name=OE9A072831T1;product=OE9A072831P1;Description=alkane hydroxylase MAH1-like;Ontology_term=GO:0005506%2C GO:0016020%2C GO:0016705%2C GO:0020037%2C GO:0055114
OE9A047011	2.01012	4.62534	1.86731	2.47701	0.0132487	0.0426286	OE9A047011	ID=OE9A047011T1;Parent=OE9A047011;Name=OE9A047011T1;product=OE9A047011P1
OE9A103591	1675.08	4.62458	0.666641	6.93714	4.00112e-12	1.61644e-10	OE9A103591	ID=OE9A103591T1;Parent=OE9A103591;Name=OE9A103591T1;product=OE9A103591P1;Description=Copper chaperone;Ontology_term=GO:0030001%2C GO:0046872
OE9A043934	2.50772	4.62337	1.46562	3.15454	0.0016075	0.0074173	OE9A043934	ID=OE9A043934T1;Parent=OE9A043934;Name=OE9A043934T1;product=OE9A043934P1;Description=G-type lectin S-receptor-like serine threonine- kinase LECRK3;Ontology_term=GO:0004674%2C GO:0005524%2C GO:0005886%2C GO:0006468%2C GO:0009069
OE9A103302	8.80026	4.62215	0.849342	5.44203	5.26754e-08	8.60131e-07	OE9A103302	ID=OE9A103302T1;Parent=OE9A103302;Name=OE9A103302T1;product=OE9A103302P1
OE9A099176	11.6094	4.61974	0.821469	5.62375	1.86857e-08	3.3742e-07	OE9A099176	ID=OE9A099176T1;Parent=OE9A099176;Name=OE9A099176T1;product=OE9A099176P1
OE9A094143	15.2703	4.61957	0.923696	5.00118	5.69794e-07	7.05758e-06	OE9A094143	ID=OE9A094143T1;Parent=OE9A094143;Name=OE9A094143T1;product=OE9A094143P1;Description=probable WRKY transcription factor 40;Ontology_term=GO:0003700%2C GO:0005667%2C GO:0006355%2C GO:0043565%2C GO:0045449
OE9A073655	5.54644	4.61701	1.10818	4.16631	3.09574e-05	0.000244899	OE9A073655	ID=OE9A073655T1;Parent=OE9A073655;Name=OE9A073655T1;product=OE9A073655P1;Description=pleiotropic drug resistance 1;Ontology_term=GO:0005524%2C GO:0005886%2C GO:0016021%2C GO:0042626%2C GO:0055085
OE9A013295	1.34222	4.61623	1.90816	2.41921	0.0155543	0.0485365	OE9A013295	ID=OE9A013295T1;Parent=OE9A013295;Name=OE9A013295T1;product=OE9A013295P1;Description=probable L-type lectin-domain containing receptor kinase;Ontology_term=GO:0004674%2C GO:0005524%2C GO:0006468%2C GO:0009069%2C GO:0016021%2C GO:0030246
OE9A027079	2.5095	4.6158	1.40039	3.29609	0.000980402	0.0048917	OE9A027079	ID=OE9A027079T1;Parent=OE9A027079;Name=OE9A027079T1;product=OE9A027079P1
OE9A053160	7.10483	4.61055	0.919034	5.01673	5.25577e-07	6.55822e-06	OE9A053160	ID=OE9A053160T1;Parent=OE9A053160;Name=OE9A053160T1;product=OE9A053160P1;Description=sentrin-specific protease 6-like;Ontology_term=GO:0006508%2C GO:0008234
OE9A093102	2.50729	4.61044	1.7392	2.6509	0.00802777	0.0282578	OE9A093102	ID=OE9A093102T1;Parent=OE9A093102;Name=OE9A093102T1;product=OE9A093102P1;Description=sugar phosphate phosphate translocator;Ontology_term=GO:0006508%2C GO:0016020%2C GO:0044267
OE9A053011	2.77085	4.61022	2.19848	2.097	0.0359934	0.0943132	OE9A053011	ID=OE9A053011T1;Parent=OE9A053011;Name=OE9A053011T1;product=OE9A053011P1
OE9A065555	2.36534	4.60698	1.53008	3.01095	0.00260431	0.0111413	OE9A065555	ID=OE9A065555T1;Parent=OE9A065555;Name=OE9A065555T1;product=OE9A065555P1;Description=delta(24)-sterol reductase;Ontology_term=GO:0005516%2C GO:0005774%2C GO:0005886%2C GO:0009808%2C GO:0009826%2C GO:0009834%2C GO:0016021%2C GO:0016132%2C GO:0016614%2C GO:0050660%2C GO:0055114
OE9A056527	5.40493	4.60682	1.05463	4.36821	1.25271e-05	0.000110513	OE9A056527	ID=OE9A056527T1;Parent=OE9A056527;Name=OE9A056527T1;product=OE9A056527P1;Description=pleiotropic drug resistance 1;Ontology_term=GO:0005524%2C GO:0006810%2C GO:0016021%2C GO:0016887
OE9A045137	1.45189	4.60481	2.06853	2.22613	0.0260058	0.0732063	OE9A045137	ID=OE9A045137T1;Parent=OE9A045137;Name=OE9A045137T1;product=OE9A045137P1;Description=peroxidase 27-like;Ontology_term=GO:0004601%2C GO:0005576%2C GO:0006804%2C GO:0006979%2C GO:0009505%2C GO:0009664%2C GO:0020037%2C GO:0042744%2C GO:0046872%2C GO:0055114%2C GO:0098869
OE9A040328	7.12617	4.5972	1.23712	3.71603	0.000202374	0.00125405	OE9A040328	ID=OE9A040328T1;Parent=OE9A040328;Name=OE9A040328T1;product=OE9A040328P1;Description=ethylene-responsive transcription factor ERF023-like;Ontology_term=GO:0003677%2C GO:0003700%2C GO:0005667%2C GO:0006355%2C GO:0045449
OE9A116547	4.39663	4.58853	1.32253	3.46951	0.000521417	0.00283171	OE9A116547	ID=OE9A116547T1;Parent=OE9A116547;Name=OE9A116547T1;product=OE9A116547P1;Description=metalloendo ase 3-MMP-like;Ontology_term=GO:0004222%2C GO:0005509%2C GO:0006508%2C GO:0008270%2C GO:0031012
OE9A044552	3.90845	4.58351	1.55398	2.94953	0.00318261	0.0131947	OE9A044552	ID=OE9A044552T1;Parent=OE9A044552;Name=OE9A044552T1;product=OE9A044552P1;Description=GATA transcription factor 4-like;Ontology_term=GO:0003700%2C GO:0005667%2C GO:0006355%2C GO:0008270%2C GO:0043565%2C GO:0045449
OE9A104793	2.49797	4.58178	1.5678	2.92243	0.00347308	0.0142056	OE9A104793	ID=OE9A104793T1;Parent=OE9A104793;Name=OE9A104793T1;product=OE9A104793P1
OE9A113188	3.00241	4.57617	1.45393	3.14746	0.00164696	0.00757203	OE9A113188	ID=OE9A113188T1;Parent=OE9A113188;Name=OE9A113188T1;product=OE9A113188P1;Description=serine threonine- kinase BLUS1-like;Ontology_term=GO:0004672%2C GO:0005524%2C GO:0006468
OE9A103029	2.76646	4.5748	1.26457	3.61767	0.000297268	0.00174493	OE9A103029	ID=OE9A103029T1;Parent=OE9A103029;Name=OE9A103029T1;product=OE9A103029P1;Description=DELLA RGL1-like;Ontology_term=GO:0006355
OE9A087260	1.98804	4.5721	1.93624	2.36133	0.0182097	0.0550685	OE9A087260	ID=OE9A087260T1;Parent=OE9A087260;Name=OE9A087260T1;product=OE9A087260P1;Description=transparent testa 1;Ontology_term=GO:0005488
OE9A024659	1.99076	4.56989	1.67051	2.73563	0.0062261	0.0229384	OE9A024659	ID=OE9A024659T1;Parent=OE9A024659;Name=OE9A024659T1;product=OE9A024659P1
OE9A026140	95.4948	4.56768	0.534388	8.54749	1.25798e-17	1.53377e-15	OE9A026140	ID=OE9A026140T1;Parent=OE9A026140;Name=OE9A026140T1;product=OE9A026140P1;Description=probable inactive receptor kinase At1g48480;Ontology_term=GO:0004672%2C GO:0005515%2C GO:0005524%2C GO:0006468%2C GO:0016020
OE9A039757	11.8214	4.56667	0.677989	6.73561	1.63246e-11	5.72419e-10	OE9A039757	ID=OE9A039757T1;Parent=OE9A039757;Name=OE9A039757T1;product=OE9A039757P1;Description=ankyrin repeat-containing ITN1-like isoform X1;Ontology_term=GO:0005515%2C GO:0016020
OE9A035189	1.88365	4.56431	1.52939	2.98441	0.0028413	0.0120056	OE9A035189	ID=OE9A035189T1;Parent=OE9A035189;Name=OE9A035189T1;product=OE9A035189P1;Description=cation H(+) antiporter 24-like;Ontology_term=GO:0005451%2C GO:0006885%2C GO:0012505%2C GO:0015992%2C GO:0016021%2C GO:0055085
OE9A077719	2.44753	4.56395	1.42961	3.19244	0.00141078	0.00666064	OE9A077719	ID=OE9A077719T2;Parent=OE9A077719;Name=OE9A077719T2;product=OE9A077719P2;Description=NADP-dependent malic enzyme-like isoform X2;Ontology_term=GO:0004471%2C GO:0006090%2C GO:0006099%2C GO:0006108%2C GO:0015976%2C GO:0046872%2C GO:0051287
OE9A012512	4.18753	4.56214	1.29033	3.53565	0.000406768	0.00228643	OE9A012512	ID=OE9A012512T1;Parent=OE9A012512;Name=OE9A012512T1;product=OE9A012512P1;Description=heat shock 70 kDa 17;Ontology_term=GO:0000166%2C GO:0012505%2C GO:0043231%2C GO:0044444
OE9A081147	59.5653	4.56155	0.849728	5.36824	7.95068e-08	1.24282e-06	OE9A081147	ID=OE9A081147T1;Parent=OE9A081147;Name=OE9A081147T1;product=OE9A081147P1;Description=receptor kinase 1;Ontology_term=GO:0004674%2C GO:0005515%2C GO:0005524%2C GO:0005576%2C GO:0005886%2C GO:0006468%2C GO:0006508%2C GO:0009069%2C GO:0016021%2C GO:0048544
OE9A092563	4.43153	4.558	1.27557	3.57332	0.00035249	0.00201936	OE9A092563	ID=OE9A092563T1;Parent=OE9A092563;Name=OE9A092563T1;product=OE9A092563P1
OE9A011402	1.63026	4.55731	2.0145	2.26226	0.0236815	0.0679617	OE9A011402	ID=OE9A011402T1;Parent=OE9A011402;Name=OE9A011402T1;product=OE9A011402P1;Description=UDP-glucuronic acid decarboxylase 1;Ontology_term=GO:0005982%2C GO:0005985%2C GO:0009117%2C GO:0016021%2C GO:0016857%2C GO:0048040
OE9A112302	8.57933	4.55453	1.00596	4.52754	5.96735e-06	5.71921e-05	OE9A112302	ID=OE9A112302T1;Parent=OE9A112302;Name=OE9A112302T1;product=OE9A112302P1;Description=G-type lectin S-receptor-like serine threonine- kinase RLK1;Ontology_term=GO:0004674%2C GO:0005524%2C GO:0006468%2C GO:0009069%2C GO:0016020
OE9A040701	3.81106	4.5534	1.16014	3.92487	8.67753e-05	0.000602074	OE9A040701	ID=OE9A040701T1;Parent=OE9A040701;Name=OE9A040701T1;product=OE9A040701P1;Description=ankyrin repeat-containing ITN1-like isoform X1;Ontology_term=GO:0005515
OE9A087625	2.91279	4.55057	1.6858	2.69935	0.00694744	0.0250994	OE9A087625	ID=OE9A087625T1;Parent=OE9A087625;Name=OE9A087625T1;product=OE9A087625P1;Description=probable nucleolar 5-2;Ontology_term=GO:0000154%2C GO:0030515%2C GO:0031428%2C GO:0032040
OE9A076753	101.289	4.55007	0.927793	4.90418	9.38175e-07	1.101e-05	OE9A076753	ID=OE9A076753T1;Parent=OE9A076753;Name=OE9A076753T1;product=OE9A076753P1;Description=exocyst complex component EXO70A1-like;Ontology_term=GO:0000145%2C GO:0006887
OE9A102681	2.71804	4.54969	1.40495	3.23832	0.00120236	0.00582911	OE9A102681	ID=OE9A102681T1;Parent=OE9A102681;Name=OE9A102681T1;product=OE9A102681P1;Description=transcription factor DUO1-like;Ontology_term=GO:0003677
OE9A051181	1.18027	4.5481	1.81567	2.50491	0.0122484	0.0399858	OE9A051181	ID=OE9A051181T1;Parent=OE9A051181;Name=OE9A051181T1;product=OE9A051181P1
OE9A120682	430.358	4.54676	0.622991	7.29827	2.91482e-13	1.47795e-11	OE9A120682	ID=OE9A120682T1;Parent=OE9A120682;Name=OE9A120682T1;product=OE9A120682P1
OE9A043188	1.73532	4.54366	2.04181	2.22531	0.0260603	0.0733066	OE9A043188	ID=OE9A043188T1;Parent=OE9A043188;Name=OE9A043188T1;product=OE9A043188P1;Description=WUSCHEL-related homeobox 7-like;Ontology_term=GO:0003677%2C GO:0005634
OE9A110207	1.72249	4.54332	1.83442	2.4767	0.0132603	0.0426615	OE9A110207	ID=OE9A110207T1;Parent=OE9A110207;Name=OE9A110207T1;product=OE9A110207P1
OE9A004056	47.5299	4.54076	0.776694	5.84627	5.02726e-09	1.01769e-07	OE9A004056	ID=OE9A004056T1;Parent=OE9A004056;Name=OE9A004056T1;product=OE9A004056P1;Description=premnaspirodiene oxygenase-like;Ontology_term=GO:0004497%2C GO:0005506%2C GO:0016021%2C GO:0016705%2C GO:0020037%2C GO:0055114
OE9A061670	3.72904	4.53921	1.0974	4.13632	3.52915e-05	0.000274428	OE9A061670	ID=OE9A061670T1;Parent=OE9A061670;Name=OE9A061670T1;product=OE9A061670P1;Description=probable LRR receptor-like serine threonine- kinase At5g45780 isoform X1;Ontology_term=GO:0004674%2C GO:0005524%2C GO:0006468%2C GO:0009069%2C GO:0016021
OE9A024928	7.78122	4.53619	0.809865	5.60117	2.12915e-08	3.80011e-07	OE9A024928	ID=OE9A024928T1;Parent=OE9A024928;Name=OE9A024928T1;product=OE9A024928P1;Description=CT099, partial;Ontology_term=GO:0006118%2C GO:0009055
OE9A108005	1.83321	4.535	1.87402	2.41993	0.0155235	0.0484591	OE9A108005	ID=OE9A108005T1;Parent=OE9A108005;Name=OE9A108005T1;product=OE9A108005P1
OE9A099966	1.19553	4.53423	1.82824	2.4801	0.0131344	0.0423504	OE9A099966	ID=OE9A099966T1;Parent=OE9A099966;Name=OE9A099966T1;product=OE9A099966P1
OE9A106169	117.276	4.5335	0.850871	5.32807	9.92607e-08	1.50274e-06	OE9A106169	ID=OE9A106169T1;Parent=OE9A106169;Name=OE9A106169T1;product=OE9A106169P1;Description=vetispiradiene synthase 2-like;Ontology_term=GO:0000287%2C GO:0008152%2C GO:0010333
OE9A006245	1.07554	4.53174	2.12002	2.13759	0.0325497	0.0872507	OE9A006245	ID=OE9A006245T1;Parent=OE9A006245;Name=OE9A006245T1;product=OE9A006245P1;Description=aspartic ase PCS1-like;Ontology_term=GO:0004190%2C GO:0006508
OE9A091489	3.155	4.52722	1.56897	2.88547	0.00390834	0.0156294	OE9A091489	ID=OE9A091489T1;Parent=OE9A091489;Name=OE9A091489T1;product=OE9A091489P1
OE9A006738	527724	4.52683	0.57083	7.93026	2.18687e-15	1.73775e-13	OE9A006738	ID=OE9A006738T1;Parent=OE9A006738;Name=OE9A006738T1;product=OE9A006738P1
OE9A058533	3.91755	4.52464	1.27495	3.54887	0.000386885	0.00219	OE9A058533	ID=OE9A058533T1;Parent=OE9A058533;Name=OE9A058533T1;product=OE9A058533P1;Description=SRC2 homolog;Ontology_term=GO:0005515
OE9A107104	2.40574	4.52449	1.57861	2.86612	0.00415539	0.0164547	OE9A107104	ID=OE9A107104T1;Parent=OE9A107104;Name=OE9A107104T1;product=OE9A107104P1;Description=cytochrome P450 71A8-like;Ontology_term=GO:0004497%2C GO:0005506%2C GO:0016020%2C GO:0016705%2C GO:0020037%2C GO:0055114
OE9A062122	1.11595	4.52322	1.57637	2.8694	0.00411254	0.0163113	OE9A062122	ID=OE9A062122T1;Parent=OE9A062122;Name=OE9A062122T1;product=OE9A062122P1;Description=dynamin-related 5A;Ontology_term=GO:0003924%2C GO:0005525
OE9A104307	1.68007	4.52277	2.08883	2.16521	0.0303716	0.0826537	OE9A104307	ID=OE9A104307T1;Parent=OE9A104307;Name=OE9A104307T1;product=OE9A104307P1;Description=probable LRR receptor-like serine threonine- kinase At1g56140 isoform X1;Ontology_term=GO:0004672%2C GO:0005524%2C GO:0006468%2C GO:0016021
OE9A031424	1.93726	4.52164	1.88689	2.39634	0.0165597	0.0509797	OE9A031424	ID=OE9A031424T1;Parent=OE9A031424;Name=OE9A031424T1;product=OE9A031424P1
OE9A067253	3.1343	4.5212	1.50369	3.00674	0.00264069	0.0112698	OE9A067253	ID=OE9A067253T1;Parent=OE9A067253;Name=OE9A067253T1;product=OE9A067253P1;Description=alpha carbonic anhydrase 7-like;Ontology_term=GO:0004089%2C GO:0006730%2C GO:0006807%2C GO:0008270
OE9A030206	70.3674	4.52053	0.661121	6.83768	8.04856e-12	3.09018e-10	OE9A030206	ID=OE9A030206T1;Parent=OE9A030206;Name=OE9A030206T1;product=OE9A030206P1;Description=premnaspirodiene oxygenase-like;Ontology_term=GO:0004497%2C GO:0005506%2C GO:0016021%2C GO:0016705%2C GO:0020037%2C GO:0055114
OE9A090097	14.1484	4.51868	0.862683	5.23794	1.62378e-07	2.3281e-06	OE9A090097	ID=OE9A090097T1;Parent=OE9A090097;Name=OE9A090097T1;product=OE9A090097P1;Description=cytochrome P450 78A7-like;Ontology_term=GO:0004497%2C GO:0005506%2C GO:0016021%2C GO:0016705%2C GO:0020037%2C GO:0055114
OE9A052474	42.2151	4.516	0.775945	5.82001	5.88449e-09	1.17557e-07	OE9A052474	ID=OE9A052474T1;Parent=OE9A052474;Name=OE9A052474T1;product=OE9A052474P1;Description=salicylic acid-binding 2-like;Ontology_term=GO:0016787
OE9A000458	1.54611	4.51533	1.54203	2.92817	0.00340964	0.0139835	OE9A000458	ID=OE9A000458T1;Parent=OE9A000458;Name=OE9A000458T1;product=OE9A000458P1;Description=probable boron transporter 7;Ontology_term=GO:0005452%2C GO:0006821%2C GO:0015701%2C GO:0016021
OE9A091680	9.11765	4.51521	0.860071	5.24981	1.52259e-07	2.20679e-06	OE9A091680	ID=OE9A091680T1;Parent=OE9A091680;Name=OE9A091680T1;product=OE9A091680P1;Description=receptor kinase At5g39000;Ontology_term=GO:0004672%2C GO:0005524%2C GO:0006468%2C GO:0016020
OE9A020241	5.02415	4.51371	1.17405	3.84457	0.000120762	0.000804847	OE9A020241	ID=OE9A020241T1;Parent=OE9A020241;Name=OE9A020241T1;product=OE9A020241P1;Description=uncharacterized protein LOC111385004;Ontology_term=GO:0016020
OE9A023324	321.16	4.5135	0.738731	6.1098	9.97554e-10	2.36394e-08	OE9A023324	ID=OE9A023324T1;Parent=OE9A023324;Name=OE9A023324T1;product=OE9A023324P1;Description=vetispiradiene synthase 2-like;Ontology_term=GO:0000287%2C GO:0008152%2C GO:0010333
OE9A110242	46.5895	4.5128	0.581351	7.7626	8.32033e-15	5.79052e-13	OE9A110242	ID=OE9A110242T1;Parent=OE9A110242;Name=OE9A110242T1;product=OE9A110242P1;Description=callose synthase 12;Ontology_term=GO:0000003%2C GO:0000148%2C GO:0003843%2C GO:0005794%2C GO:0005982%2C GO:0005985%2C GO:0006075%2C GO:0009506%2C GO:0009555%2C GO:0009870%2C GO:0009965%2C GO:0010150%2C GO:0016021%2C GO:0042742%2C GO:0050832%2C GO:0052544
OE9A073184	1.82536	4.50945	1.74648	2.58202	0.00982239	0.0333156	OE9A073184	ID=OE9A073184T1;Parent=OE9A073184;Name=OE9A073184T1;product=OE9A073184P1;Description=AP2 ERF and B3 domain-containing transcription factor RAV1-like;Ontology_term=GO:0003677%2C GO:0003700%2C GO:0005634%2C GO:0005667%2C GO:0006355%2C GO:0045449
OE9A087978	50.8213	4.50513	0.611517	7.36713	1.74336e-13	9.31268e-12	OE9A087978	ID=OE9A087978T1;Parent=OE9A087978;Name=OE9A087978T1;product=OE9A087978P1;Description=WRKY transcription factor 55;Ontology_term=GO:0003700%2C GO:0005667%2C GO:0006355%2C GO:0043565%2C GO:0045449
OE9A041172	2.14606	4.50272	1.24338	3.62134	0.000293078	0.00172351	OE9A041172	ID=OE9A041172T1;Parent=OE9A041172;Name=OE9A041172T1;product=OE9A041172P1;Description=zinc finger RNA-binding -like;Ontology_term=GO:0003676%2C GO:0008270
OE9A119630	1700.49	4.50017	0.559003	8.05034	8.25629e-16	7.27839e-14	OE9A119630	ID=OE9A119630T1;Parent=OE9A119630;Name=OE9A119630T1;product=OE9A119630P1;Description=Copper chaperone;Ontology_term=GO:0046872
OE9A092699	5.09116	4.49929	1.10266	4.08039	4.496e-05	0.000338845	OE9A092699	ID=OE9A092699T1;Parent=OE9A092699;Name=OE9A092699T1;product=OE9A092699P1;Description=dirigent 22-like;Ontology_term=GO:0009699%2C GO:0042349
OE9A073171	95221.6	4.49682	0.567661	7.92166	2.34357e-15	1.83488e-13	OE9A073171	ID=OE9A073171T1;Parent=OE9A073171;Name=OE9A073171T1;product=OE9A073171P1
OE9A029570	2.04062	4.49667	1.76438	2.54858	0.0108161	0.0361375	OE9A029570	ID=OE9A029570T1;Parent=OE9A029570;Name=OE9A029570T1;product=OE9A029570P1;Description=dof zinc finger -like;Ontology_term=GO:0003677%2C GO:0006355
OE9A000335	1.67142	4.49485	1.83359	2.4514	0.0142304	0.045146	OE9A000335	ID=OE9A000335T1;Parent=OE9A000335;Name=OE9A000335T1;product=OE9A000335P1
OE9A082513	1143.08	4.49414	0.550081	8.16996	3.08483e-16	2.91544e-14	OE9A082513	ID=OE9A082513T1;Parent=OE9A082513;Name=OE9A082513T1;product=OE9A082513P1
OE9A083404	519.884	4.49234	0.514778	8.72676	2.62066e-18	3.4881e-16	OE9A083404	ID=OE9A083404T1;Parent=OE9A083404;Name=OE9A083404T1;product=OE9A083404P1
OE9A087491	59.3549	4.49157	0.634604	7.07776	1.46501e-12	6.46657e-11	OE9A087491	ID=OE9A087491T1;Parent=OE9A087491;Name=OE9A087491T1;product=OE9A087491P1;Description=probable WRKY transcription factor 29;Ontology_term=GO:0003700%2C GO:0005667%2C GO:0006355%2C GO:0043565%2C GO:0045449
OE9A070518	420.114	4.48837	0.711568	6.30772	2.83167e-10	7.5442e-09	OE9A070518	ID=OE9A070518T1;Parent=OE9A070518;Name=OE9A070518T1;product=OE9A070518P1;Description=acidic mammalian chitinase-like;Ontology_term=GO:0004568%2C GO:0005576%2C GO:0005975%2C GO:0006032%2C GO:0008061%2C GO:0016998
OE9A008388	2.96523	4.488	1.4632	3.06725	0.0021604	0.00952283	OE9A008388	ID=OE9A008388T1;Parent=OE9A008388;Name=OE9A008388T1;product=OE9A008388P1;Description=CBL-interacting serine threonine- kinase 23 isoform X3;Ontology_term=GO:0004674%2C GO:0005524%2C GO:0006468%2C GO:0007165%2C GO:0009069
OE9A116554	4.14832	4.48771	1.52723	2.93846	0.00329843	0.0135937	OE9A116554	ID=OE9A116554T1;Parent=OE9A116554;Name=OE9A116554T1;product=OE9A116554P1;Description=heat stress transcription factor B-2a-like;Ontology_term=GO:0003700%2C GO:0005634%2C GO:0005667%2C GO:0006355%2C GO:0043565%2C GO:0045449
OE9A118454	484323	4.48383	0.608192	7.37239	1.67596e-13	9.01295e-12	OE9A118454	ID=OE9A118454T1;Parent=OE9A118454;Name=OE9A118454T1;product=OE9A118454P1
OE9A038210	3.76972	4.48053	1.28628	3.48332	0.000495227	0.0027112	OE9A038210	ID=OE9A038210T1;Parent=OE9A038210;Name=OE9A038210T1;product=OE9A038210P1
OE9A040578	3.80308	4.4782	1.40263	3.19272	0.00140938	0.00665503	OE9A040578	ID=OE9A040578T1;Parent=OE9A040578;Name=OE9A040578T1;product=OE9A040578P1
OE9A101805	3.92734	4.47532	1.15884	3.86188	0.000112517	0.000757482	OE9A101805	ID=OE9A101805T1;Parent=OE9A101805;Name=OE9A101805T1;product=OE9A101805P1
OE9A084506	76.0794	4.47325	0.660184	6.77576	1.23754e-11	4.55437e-10	OE9A084506	ID=OE9A084506T1;Parent=OE9A084506;Name=OE9A084506T1;product=OE9A084506P1;Description=serine threonine- kinase CCR3;Ontology_term=GO:0004674%2C GO:0005524%2C GO:0006468%2C GO:0009069%2C GO:0016021
OE9A053436	1.42404	4.46948	1.81946	2.45649	0.0140303	0.0446044	OE9A053436	ID=OE9A053436T1;Parent=OE9A053436;Name=OE9A053436T1;product=OE9A053436P1;Description=B3 domain-containing Os04g0386900-like;Ontology_term=GO:0003677
OE9A076031	2.61706	4.46895	1.45049	3.081	0.00206307	0.00914555	OE9A076031	ID=OE9A076031T1;Parent=OE9A076031;Name=OE9A076031T1;product=OE9A076031P1;Description=GDSL esterase lipase At1g29670-like;Ontology_term=GO:0016020%2C GO:0016788
OE9A008708	1.56006	4.4661	1.76159	2.53527	0.011236	0.0372521	OE9A008708	ID=OE9A008708T1;Parent=OE9A008708;Name=OE9A008708T1;product=OE9A008708P1
OE9A001712	3.13499	4.4603	1.45601	3.06337	0.00218856	0.00962304	OE9A001712	ID=OE9A001712T1;Parent=OE9A001712;Name=OE9A001712T1;product=OE9A001712P1;Description=polygalacturonase-like;Ontology_term=GO:0004650%2C GO:0005576%2C GO:0005982%2C GO:0005985%2C GO:0071555
OE9A043219	2.74723	4.45961	1.22517	3.63999	0.000272653	0.00162221	OE9A043219	ID=OE9A043219T1;Parent=OE9A043219;Name=OE9A043219T1;product=OE9A043219P1;Description=photosystem I P700 apo A1, partial (plastid);Ontology_term=GO:0009507%2C GO:0009522%2C GO:0015979%2C GO:0016021%2C GO:0046872
OE9A045580	564.133	4.45609	0.769526	5.7907	7.00949e-09	1.37622e-07	OE9A045580	ID=OE9A045580T1;Parent=OE9A045580;Name=OE9A045580T1;product=OE9A045580P1
OE9A038556	3.66861	4.45426	1.5424	2.88788	0.00387847	0.0155294	OE9A038556	ID=OE9A038556T1;Parent=OE9A038556;Name=OE9A038556T1;product=OE9A038556P1;Description=transcription factor WER-like;Ontology_term=GO:0003677
OE9A084676	3.43553	4.45263	1.65486	2.69064	0.0071316	0.0256632	OE9A084676	ID=OE9A084676T1;Parent=OE9A084676;Name=OE9A084676T1;product=OE9A084676P1;Description=uncharacterized protein LOC111408626;Ontology_term=GO:0005488
OE9A115663	25.8298	4.44569	0.6841	6.49859	8.10758e-11	2.43869e-09	OE9A115663	ID=OE9A115663T1;Parent=OE9A115663;Name=OE9A115663T1;product=OE9A115663P1;Description=U-box domain-containing 21-like;Ontology_term=GO:0004842%2C GO:0005488%2C GO:0016567
OE9A008538	3.28332	4.44489	2.11878	2.09786	0.0359179	0.0941771	OE9A008538	ID=OE9A008538T1;Parent=OE9A008538;Name=OE9A008538T1;product=OE9A008538P1;Description=transmembrane emp24 domain-containing p24delta9-like;Ontology_term=GO:0006810%2C GO:0016021
OE9A069252	1.28924	4.44366	2.0442	2.17379	0.0297212	0.0812854	OE9A069252	ID=OE9A069252T1;Parent=OE9A069252;Name=OE9A069252T1;product=OE9A069252P1;Description=u-box domain-containing 3;Ontology_term=GO:0005515
OE9A111504	5.5955	4.44281	1.22333	3.63173	0.000281532	0.00166789	OE9A111504	ID=OE9A111504T1;Parent=OE9A111504;Name=OE9A111504T1;product=OE9A111504P1;Description=zinc finger ZAT11-like;Ontology_term=GO:0046872
OE9A105762	141.715	4.44185	0.528378	8.40658	4.22138e-17	4.68222e-15	OE9A105762	ID=OE9A105762T1;Parent=OE9A105762;Name=OE9A105762T1;product=OE9A105762P1;Description=UPF0114 domain-containing;Ontology_term=GO:0016020
OE9A095857	7.55023	4.44134	0.913829	4.86015	1.17298e-06	1.34378e-05	OE9A095857	ID=OE9A095857T1;Parent=OE9A095857;Name=OE9A095857T1;product=OE9A095857P1;Description=probable pectinesterase 29;Ontology_term=GO:0005618%2C GO:0005982%2C GO:0005985%2C GO:0030599%2C GO:0042545
OE9A042816	2.43287	4.44098	1.66463	2.66786	0.00763366	0.0271578	OE9A042816	ID=OE9A042816T1;Parent=OE9A042816;Name=OE9A042816T1;product=OE9A042816P1;Description=late blight resistance homolog R1A-3;Ontology_term=GO:0043531
OE9A034359	4.40925	4.44031	1.2339	3.5986	0.000319931	0.00185843	OE9A034359	ID=OE9A034359T1;Parent=OE9A034359;Name=OE9A034359T1;product=OE9A034359P1;Description=heat shock factor HSF30;Ontology_term=GO:0003700%2C GO:0005634%2C GO:0005667%2C GO:0006355%2C GO:0006950%2C GO:0009628%2C GO:0043565%2C GO:0045449
OE9A041116	0.93104	4.43852	2.11468	2.09891	0.0358251	0.0940188	OE9A041116	ID=OE9A041116T1;Parent=OE9A041116;Name=OE9A041116T1;product=OE9A041116P1;Description=THO complex subunit 4D-like;Ontology_term=GO:0000166%2C GO:0003676
OE9A019875	2.49801	4.43647	1.88777	2.35011	0.0187679	0.0564256	OE9A019875	ID=OE9A019875T1;Parent=OE9A019875;Name=OE9A019875T1;product=OE9A019875P1
OE9A060068	2.57247	4.43632	1.71176	2.59167	0.00955123	0.0325584	OE9A060068	ID=OE9A060068T1;Parent=OE9A060068;Name=OE9A060068T1;product=OE9A060068P1
OE9A014862	1.00038	4.43516	1.99412	2.22412	0.0261406	0.0734871	OE9A014862	ID=OE9A014862T1;Parent=OE9A014862;Name=OE9A014862T1;product=OE9A014862P1
OE9A109696	7.62915	4.43415	1.40931	3.14633	0.00165336	0.00759709	OE9A109696	ID=OE9A109696T1;Parent=OE9A109696;Name=OE9A109696T1;product=OE9A109696P1;Description=S-type anion channel SLAH1-like;Ontology_term=GO:0016021%2C GO:0055085
OE9A107335	2.68825	4.43303	1.42474	3.11146	0.00186163	0.00840179	OE9A107335	ID=OE9A107335T1;Parent=OE9A107335;Name=OE9A107335T1;product=OE9A107335P1;Description=ATPase subunit 4 (mitochondrion);Ontology_term=GO:0000276%2C GO:0015078%2C GO:0015986
OE9A116035	2.76581	4.43168	1.37475	3.22362	0.00126581	0.00608112	OE9A116035	ID=OE9A116035T1;Parent=OE9A116035;Name=OE9A116035T1;product=OE9A116035P1;Description=Ulp1 protease family, C-terminal catalytic domain containing;Ontology_term=GO:0006508%2C GO:0008234
OE9A088238	2.76251	4.43157	1.46108	3.03307	0.00242079	0.0104823	OE9A088238	ID=OE9A088238T1;Parent=OE9A088238;Name=OE9A088238T1;product=OE9A088238P1;Description=phosphatidylinositol 4-kinase gamma 4-like;Ontology_term=GO:0005515
OE9A039205	3.6401	4.431	1.541	2.8754	0.00403519	0.01604	OE9A039205	ID=OE9A039205T1;Parent=OE9A039205;Name=OE9A039205T1;product=OE9A039205P1
OE9A118671	1.45651	4.42887	2.02007	2.19244	0.0283478	0.0783476	OE9A118671	ID=OE9A118671T1;Parent=OE9A118671;Name=OE9A118671T1;product=OE9A118671P1;Description=late blight resistance homolog R1A-10;Ontology_term=GO:0043531
OE9A067286	184.387	4.42691	0.631055	7.01509	2.29805e-12	9.65906e-11	OE9A067286	ID=OE9A067286T1;Parent=OE9A067286;Name=OE9A067286T1;product=OE9A067286P1
OE9A056195	8.475	4.42306	0.938363	4.71359	2.43391e-06	2.57362e-05	OE9A056195	ID=OE9A056195T1;Parent=OE9A056195;Name=OE9A056195T1;product=OE9A056195P1;Description=clathrin assembly At1g25240;Ontology_term=GO:0005545%2C GO:0016491%2C GO:0030136%2C GO:0030276%2C GO:0048268
OE9A031011	6.14638	4.42147	1.08934	4.05887	4.93109e-05	0.000366526	OE9A031011	ID=OE9A031011T1;Parent=OE9A031011;Name=OE9A031011T1;product=OE9A031011P1;Description=probable serine threonine- kinase At1g01540;Ontology_term=GO:0004672%2C GO:0005524%2C GO:0006468
OE9A061876	1.51232	4.41794	1.51251	2.92094	0.00348974	0.0142571	OE9A061876	ID=OE9A061876T1;Parent=OE9A061876;Name=OE9A061876T1;product=OE9A061876P1;Description=Serine threonine kinase;Ontology_term=GO:0004674%2C GO:0005515%2C GO:0005524%2C GO:0006468%2C GO:0009069%2C GO:0016021%2C GO:0048544
OE9A114584	48.3084	4.41747	1.04629	4.22205	2.4209e-05	0.000197228	OE9A114584	ID=OE9A114584T1;Parent=OE9A114584;Name=OE9A114584T1;product=OE9A114584P1;Description=BON1-associated 2-like;Ontology_term=GO:0005515
OE9A063541	551.628	4.41208	0.505614	8.72618	2.63408e-18	3.49141e-16	OE9A063541	ID=OE9A063541T1;Parent=OE9A063541;Name=OE9A063541T1;product=OE9A063541P1
OE9A095678	7.11448	4.40863	0.980247	4.49747	6.87661e-06	6.48366e-05	OE9A095678	ID=OE9A095678T1;Parent=OE9A095678;Name=OE9A095678T1;product=OE9A095678P1
OE9A121954	1.8419	4.40716	1.97122	2.23575	0.0253682	0.0717324	OE9A121954	ID=OE9A121954T1;Parent=OE9A121954;Name=OE9A121954T1;product=OE9A121954P1
OE9A101748	3.40046	4.40674	1.68302	2.61836	0.00883546	0.0305376	OE9A101748	ID=OE9A101748T1;Parent=OE9A101748;Name=OE9A101748T1;product=OE9A101748P1;Description=glutamate receptor -like isoform X1;Ontology_term=GO:0004970%2C GO:0006811%2C GO:0007165%2C GO:0007268%2C GO:0016020
OE9A102220	2.07633	4.40512	2.05127	2.14751	0.0317529	0.0855679	OE9A102220	ID=OE9A102220T1;Parent=OE9A102220;Name=OE9A102220T1;product=OE9A102220P1;Description=AP2-like ethylene-responsive transcription factor At1g16060;Ontology_term=GO:0003677%2C GO:0003700%2C GO:0005634%2C GO:0005667%2C GO:0006355%2C GO:0007275%2C GO:0045449
OE9A001403	4.76275	4.40269	1.34711	3.26824	0.00108217	0.00532074	OE9A001403	ID=OE9A001403T1;Parent=OE9A001403;Name=OE9A001403T1;product=OE9A001403P1;Description=LOB domain-containing 6;Ontology_term=GO:0005654%2C GO:0009799%2C GO:0009944%2C GO:0009954%2C GO:0048441
OE9A055907	2.31099	4.39924	1.65163	2.66358	0.0077315	0.0274143	OE9A055907	ID=OE9A055907T1;Parent=OE9A055907;Name=OE9A055907T1;product=OE9A055907P1;Description=calcium-transporting ATPase 12, plasma membrane-type-like;Ontology_term=GO:0000166%2C GO:0046872
OE9A011623	5.33371	4.39172	1.16446	3.77145	0.0001623	0.0010338	OE9A011623	ID=OE9A011623T1;Parent=OE9A011623;Name=OE9A011623T1;product=OE9A011623P1;Description=uncharacterized protein LOC111367851;Ontology_term=GO:0004650%2C GO:0005982%2C GO:0005985
OE9A063210	1.43022	4.39129	1.86741	2.35154	0.0186959	0.0562304	OE9A063210	ID=OE9A063210T1;Parent=OE9A063210;Name=OE9A063210T1;product=OE9A063210P1
OE9A068349	1.6658	4.38352	1.50481	2.913	0.00357974	0.0145689	OE9A068349	ID=OE9A068349T1;Parent=OE9A068349;Name=OE9A068349T1;product=OE9A068349P1
OE9A048767	10.8001	4.38346	1.06315	4.1231	3.73804e-05	0.000288634	OE9A048767	ID=OE9A048767T1;Parent=OE9A048767;Name=OE9A048767T1;product=OE9A048767P1;Description=crocetin glucosyltransferase, chloroplastic-like;Ontology_term=GO:0005215%2C GO:0006810%2C GO:0008152%2C GO:0016020%2C GO:0016758
OE9A027843	1.70686	4.38343	2.09799	2.08935	0.036676	0.0956704	OE9A027843	ID=OE9A027843T1;Parent=OE9A027843;Name=OE9A027843T1;product=OE9A027843P1;Description=COBRA-like isoform X1;Ontology_term=GO:0010215%2C GO:0016049%2C GO:0031225
OE9A048584	9.41221	4.38128	0.889553	4.92527	8.42458e-07	9.98571e-06	OE9A048584	ID=OE9A048584T1;Parent=OE9A048584;Name=OE9A048584T1;product=OE9A048584P1;Description=probable carboxylesterase 120;Ontology_term=GO:0008152%2C GO:0016787
OE9A010037	1.71422	4.37866	1.92389	2.27594	0.0228499	0.0660378	OE9A010037	ID=OE9A010037T1;Parent=OE9A010037;Name=OE9A010037T1;product=OE9A010037P1
OE9A025629	30.3051	4.37799	0.738345	5.92947	3.03914e-09	6.40808e-08	OE9A025629	ID=OE9A025629T1;Parent=OE9A025629;Name=OE9A025629T1;product=OE9A025629P1;Description=premnaspirodiene oxygenase-like;Ontology_term=GO:0005506%2C GO:0016705%2C GO:0020037%2C GO:0055114
OE9A099303	3.4329	4.37312	1.45783	2.99974	0.00270207	0.0115163	OE9A099303	ID=OE9A099303T1;Parent=OE9A099303;Name=OE9A099303T1;product=OE9A099303P1;Description=PLANT CADMIUM RESISTANCE 2-like;Ontology_term=GO:0016021
OE9A079345	2.62094	4.37295	1.39917	3.1254	0.00177565	0.00808508	OE9A079345	ID=OE9A079345T1;Parent=OE9A079345;Name=OE9A079345T1;product=OE9A079345P1;Description=Alpha beta hydrolase related;Ontology_term=GO:0016021%2C GO:0016787
OE9A066753	7.28347	4.37291	1.045	4.1846	2.85667e-05	0.000228305	OE9A066753	ID=OE9A066753T1;Parent=OE9A066753;Name=OE9A066753T1;product=OE9A066753P1;Description=transcription factor DYT1;Ontology_term=GO:0008152%2C GO:0016597%2C GO:0046983
OE9A041249	2.41833	4.37215	1.50987	2.89572	0.00378294	0.0152252	OE9A041249	ID=OE9A041249T1;Parent=OE9A041249;Name=OE9A041249T1;product=OE9A041249P1
OE9A084707	1.9371	4.3695	1.62789	2.68414	0.00727157	0.026108	OE9A084707	ID=OE9A084707T1;Parent=OE9A084707;Name=OE9A084707T1;product=OE9A084707P1;Description=subtilisin-like protease;Ontology_term=GO:0004252%2C GO:0005618%2C GO:0006508
OE9A023496	2.40202	4.36877	1.73	2.52529	0.0115602	0.0381369	OE9A023496	ID=OE9A023496T1;Parent=OE9A023496;Name=OE9A023496T1;product=OE9A023496P1;Description=methanol O-anthraniloyltransferase;Ontology_term=GO:0016020%2C GO:0016747
OE9A115757	283.207	4.36629	0.547576	7.97386	1.53798e-15	1.26296e-13	OE9A115757	ID=OE9A115757T1;Parent=OE9A115757;Name=OE9A115757T1;product=OE9A115757P1;Description=ankyrin repeat-containing At3g12360-like;Ontology_term=GO:0005515%2C GO:0007165%2C GO:0016020
OE9A112011	1.58972	4.36506	1.7825	2.44884	0.0143317	0.0453907	OE9A112011	ID=OE9A112011T1;Parent=OE9A112011;Name=OE9A112011T1;product=OE9A112011P1;Description=histidine kinase 5;Ontology_term=GO:0000155%2C GO:0005773%2C GO:0005886%2C GO:0009365%2C GO:0009788%2C GO:0010105%2C GO:0018106%2C GO:0023014%2C GO:0048364%2C GO:0070301%2C GO:0071219%2C GO:0071732%2C GO:0090333
OE9A000408	2.34139	4.3619	1.69197	2.578	0.00993738	0.0336378	OE9A000408	ID=OE9A000408T1;Parent=OE9A000408;Name=OE9A000408T1;product=OE9A000408P1;Description=pectinesterase inhibitor-like;Ontology_term=GO:0004857
OE9A013383	20.3873	4.3602	0.577681	7.54777	4.42775e-14	2.66365e-12	OE9A013383	ID=OE9A013383T1;Parent=OE9A013383;Name=OE9A013383T1;product=OE9A013383P1;Description=LRR receptor-like serine threonine- kinase GSO1;Ontology_term=GO:0005515
OE9A091328	13.1235	4.35841	0.831648	5.24069	1.59976e-07	2.30042e-06	OE9A091328	ID=OE9A091328T1;Parent=OE9A091328;Name=OE9A091328T1;product=OE9A091328P1;Description=cell division control 2 homolog A-like;Ontology_term=GO:0004674%2C GO:0005524%2C GO:0006468%2C GO:0009069
OE9A116285	2.13741	4.35809	1.80557	2.41369	0.0157918	0.0490954	OE9A116285	ID=OE9A116285T1;Parent=OE9A116285;Name=OE9A116285T1;product=OE9A116285P1
OE9A035506	25.5227	4.35705	0.831758	5.23836	1.62008e-07	2.32488e-06	OE9A035506	ID=OE9A035506T1;Parent=OE9A035506;Name=OE9A035506T1;product=OE9A035506P1;Description=ethylene-responsive transcription factor ERF096-like;Ontology_term=GO:0003677%2C GO:0003700%2C GO:0005634%2C GO:0005667%2C GO:0006355%2C GO:0045449
OE9A046590	2.5089	4.35643	1.93039	2.25676	0.0240231	0.0687382	OE9A046590	ID=OE9A046590T1;Parent=OE9A046590;Name=OE9A046590T1;product=OE9A046590P1;Description=two-component response regulator ARR14-like;Ontology_term=GO:0000160%2C GO:0003677
OE9A055386	2.09643	4.35236	2.008	2.16751	0.0301956	0.082273	OE9A055386	ID=OE9A055386T1;Parent=OE9A055386;Name=OE9A055386T1;product=OE9A055386P1;Description=auxin-responsive SAUR72-like;Ontology_term=GO:0009733
OE9A083451	9.26219	4.34961	0.927663	4.68878	2.74834e-06	2.86437e-05	OE9A083451	ID=OE9A083451T1;Parent=OE9A083451;Name=OE9A083451T1;product=OE9A083451P1;Description=AP2-like ethylene-responsive transcription factor PLT2;Ontology_term=GO:0003677%2C GO:0003700%2C GO:0005634%2C GO:0005667%2C GO:0006355%2C GO:0007275%2C GO:0045449
OE9A032136	2.54424	4.34406	1.96625	2.20932	0.0271526	0.0756861	OE9A032136	ID=OE9A032136T3;Parent=OE9A032136;Name=OE9A032136T3;product=OE9A032136P3;Description=kinesin KIN-14G isoform X1;Ontology_term=GO:0003777%2C GO:0005524%2C GO:0005874%2C GO:0007018%2C GO:0008017%2C GO:0045298
OE9A070439	4.41202	4.33901	1.09068	3.97828	6.94162e-05	0.00049638	OE9A070439	ID=OE9A070439T1;Parent=OE9A070439;Name=OE9A070439T1;product=OE9A070439P1
OE9A094368	1.56304	4.33836	1.76483	2.45823	0.0139623	0.0444258	OE9A094368	ID=OE9A094368T1;Parent=OE9A094368;Name=OE9A094368T1;product=OE9A094368P1;Description=flavonoid 3 -monooxygenase-like;Ontology_term=GO:0004497%2C GO:0005506%2C GO:0016705%2C GO:0020037%2C GO:0055114
OE9A095713	1.57696	4.33835	1.88685	2.29926	0.0214903	0.0629228	OE9A095713	ID=OE9A095713T1;Parent=OE9A095713;Name=OE9A095713T1;product=OE9A095713P1
OE9A032330	38.868	4.33702	0.536241	8.08781	6.07452e-16	5.46604e-14	OE9A032330	ID=OE9A032330T1;Parent=OE9A032330;Name=OE9A032330T1;product=OE9A032330P1;Description=mannan endo-1,4-beta-mannosidase 2-like;Ontology_term=GO:0006000%2C GO:0006013%2C GO:0006080%2C GO:0016021%2C GO:0016985%2C GO:0046355
OE9A081967	9.55375	4.33432	1.06748	4.06032	4.90048e-05	0.000364727	OE9A081967	ID=OE9A081967T1;Parent=OE9A081967;Name=OE9A081967T1;product=OE9A081967P1;Description=monocopper oxidase SKU5;Ontology_term=GO:0005507%2C GO:0005525%2C GO:0005622%2C GO:0006118%2C GO:0007264%2C GO:0008447%2C GO:0019852%2C GO:0055114
OE9A067340	1.79514	4.3322	1.55668	2.78297	0.00538645	0.0203713	OE9A067340	ID=OE9A067340T1;Parent=OE9A067340;Name=OE9A067340T1;product=OE9A067340P1
OE9A021453	2.19678	4.3318	1.70102	2.54659	0.0108781	0.0363267	OE9A021453	ID=OE9A021453T1;Parent=OE9A021453;Name=OE9A021453T1;product=OE9A021453P1
OE9A077734	3.42144	4.33016	1.2838	3.37292	0.000743751	0.00386127	OE9A077734	ID=OE9A077734T1;Parent=OE9A077734;Name=OE9A077734T1;product=OE9A077734P1
OE9A083500	6.57171	4.33015	0.987669	4.38422	1.16404e-05	0.000103548	OE9A083500	ID=OE9A083500T1;Parent=OE9A083500;Name=OE9A083500T1;product=OE9A083500P1
OE9A106592	3.16737	4.3246	1.20785	3.58041	0.000343052	0.00197378	OE9A106592	ID=OE9A106592T1;Parent=OE9A106592;Name=OE9A106592T1;product=OE9A106592P1
OE9A031116	8.14419	4.32341	0.934377	4.62705	3.70904e-06	3.7435e-05	OE9A031116	ID=OE9A031116T1;Parent=OE9A031116;Name=OE9A031116T1;product=OE9A031116P1;Description=G-type lectin S-receptor-like serine threonine- kinase At4g27290 isoform X1;Ontology_term=GO:0004674%2C GO:0009069%2C GO:0016310
OE9A020862	9.0088	4.31947	1.05	4.11377	3.89243e-05	0.000298815	OE9A020862	ID=OE9A020862T1;Parent=OE9A020862;Name=OE9A020862T1;product=OE9A020862P1;Description=homeobox-leucine zipper HDG11-like;Ontology_term=GO:0003677%2C GO:0008289
OE9A069826	10.4057	4.31661	0.920359	4.69014	2.73013e-06	2.84754e-05	OE9A069826	ID=OE9A069826T1;Parent=OE9A069826;Name=OE9A069826T1;product=OE9A069826P1;Description=expansin-like B1;Ontology_term=GO:0005576
OE9A097581	1.66939	4.31387	1.81655	2.37475	0.0175607	0.0534859	OE9A097581	ID=OE9A097581T1;Parent=OE9A097581;Name=OE9A097581T1;product=OE9A097581P1
OE9A115219	4.44908	4.31278	1.36661	3.15583	0.00160044	0.00739217	OE9A115219	ID=OE9A115219T1;Parent=OE9A115219;Name=OE9A115219T1;product=OE9A115219P1;Description=zinc finger JAGGED-like isoform X2;Ontology_term=GO:0007275%2C GO:0046872
OE9A074162	1.49599	4.31007	1.58057	2.72691	0.00639308	0.0234279	OE9A074162	ID=OE9A074162T1;Parent=OE9A074162;Name=OE9A074162T1;product=OE9A074162P1;Description=early nodulin 2;Ontology_term=GO:0006118%2C GO:0009055
OE9A005349	151.99	4.30767	0.4037	10.6705	1.39919e-26	7.32716e-24	OE9A005349	ID=OE9A005349T1;Parent=OE9A005349;Name=OE9A005349T1;product=OE9A005349P1;Description=lysine histidine transporter 1-like;Ontology_term=GO:0016021
OE9A074009	6.78731	4.30759	0.885361	4.86535	1.14252e-06	1.31141e-05	OE9A074009	ID=OE9A074009T1;Parent=OE9A074009;Name=OE9A074009T1;product=OE9A074009P1
OE9A119720	2.44049	4.30749	1.53113	2.81327	0.00490399	0.0188693	OE9A119720	ID=OE9A119720T1;Parent=OE9A119720;Name=OE9A119720T1;product=OE9A119720P1;Description=2-oxoglutarate-dependent dioxygenase DAO-like;Ontology_term=GO:0009852%2C GO:0046872%2C GO:0051213%2C GO:0055114
OE9A108800	1.54377	4.30719	1.62443	2.6515	0.00801341	0.0282259	OE9A108800	ID=OE9A108800T1;Parent=OE9A108800;Name=OE9A108800T1;product=OE9A108800P1
OE9A066556	0.977036	4.30674	1.75584	2.45281	0.0141747	0.0450006	OE9A066556	ID=OE9A066556T1;Parent=OE9A066556;Name=OE9A066556T1;product=OE9A066556P1;Description=Ycf1 (chloroplast);Ontology_term=GO:0009507%2C GO:0016021
OE9A115935	2.01867	4.29552	1.51387	2.83744	0.00454764	0.0177353	OE9A115935	ID=OE9A115935T1;Parent=OE9A115935;Name=OE9A115935T1;product=OE9A115935P1;Description=late blight resistance homolog R1A-3 isoform X1;Ontology_term=GO:0005515%2C GO:0043531
OE9A058650	4.99583	4.29457	1.12174	3.8285	0.000128928	0.000851627	OE9A058650	ID=OE9A058650T1;Parent=OE9A058650;Name=OE9A058650T1;product=OE9A058650P1;Description=;Ontology_term=GO:0005515
OE9A034191	17.0769	4.29382	0.686508	6.25458	3.98581e-10	1.03179e-08	OE9A034191	ID=OE9A034191T1;Parent=OE9A034191;Name=OE9A034191T1;product=OE9A034191P1
OE9A090941	1.43914	4.29371	2.00496	2.14155	0.03223	0.0865681	OE9A090941	ID=OE9A090941T1;Parent=OE9A090941;Name=OE9A090941T1;product=OE9A090941P1;Description=endoglucanase 16;Ontology_term=GO:0004553%2C GO:0005975
OE9A082542	3.04467	4.2855	1.71185	2.50343	0.0122997	0.0401203	OE9A082542	ID=OE9A082542T1;Parent=OE9A082542;Name=OE9A082542T1;product=OE9A082542P1;Description=transcription factor MYB113-like;Ontology_term=GO:0003677
OE9A118041	2.53001	4.28007	1.37848	3.10492	0.00190331	0.0085657	OE9A118041	ID=OE9A118041T1;Parent=OE9A118041;Name=OE9A118041T1;product=OE9A118041P1
OE9A109149	290.258	4.27759	0.723658	5.91107	3.39902e-09	7.11055e-08	OE9A109149	ID=OE9A109149T1;Parent=OE9A109149;Name=OE9A109149T1;product=OE9A109149P1;Description=disease resistance RPM1-like;Ontology_term=GO:0043531
OE9A058422	2.31904	4.27406	1.49555	2.85785	0.00426518	0.0168082	OE9A058422	ID=OE9A058422T1;Parent=OE9A058422;Name=OE9A058422T1;product=OE9A058422P1;Description=PLASMODESMATA CALLOSE-BINDING PROTEIN 5-like isoform X1;Ontology_term=GO:0004553%2C GO:0005975%2C GO:0016021%2C GO:0030247%2C GO:0046658
OE9A081304	1.83697	4.27357	2.01447	2.12144	0.0338847	0.090021	OE9A081304	ID=OE9A081304T1;Parent=OE9A081304;Name=OE9A081304T1;product=OE9A081304P1
OE9A103578	5.15678	4.2672	1.08445	3.93488	8.32384e-05	0.000580815	OE9A103578	ID=OE9A103578T1;Parent=OE9A103578;Name=OE9A103578T1;product=OE9A103578P1;Description=Heavy metal transport detoxification superfamily;Ontology_term=GO:0030001%2C GO:0046872
OE9A063023	2.25633	4.26645	1.48377	2.87542	0.00403492	0.01604	OE9A063023	ID=OE9A063023T1;Parent=OE9A063023;Name=OE9A063023T1;product=OE9A063023P1;Description=oleosin 1;Ontology_term=GO:0012511%2C GO:0016021%2C GO:0019915
OE9A116576	3.28746	4.26294	1.33648	3.18967	0.00142437	0.00671589	OE9A116576	ID=OE9A116576T1;Parent=OE9A116576;Name=OE9A116576T1;product=OE9A116576P1;Description=cell division cycle 123 homolog;Ontology_term=GO:0007049
OE9A005433	4.12431	4.26164	1.06567	3.99902	6.36066e-05	0.000459462	OE9A005433	ID=OE9A005433T1;Parent=OE9A005433;Name=OE9A005433T1;product=OE9A005433P1;Description=kinesin KIN-13B;Ontology_term=GO:0003777%2C GO:0005524%2C GO:0005874%2C GO:0007018%2C GO:0008017%2C GO:0045298
OE9A084043	1.5433	4.25858	1.95996	2.17279	0.0297963	0.081449	OE9A084043	ID=OE9A084043T1;Parent=OE9A084043;Name=OE9A084043T1;product=OE9A084043P1;Description=CASP 4D1;Ontology_term=GO:0016020
OE9A088243	9.15638	4.25588	0.796168	5.34545	9.01922e-08	1.38781e-06	OE9A088243	ID=OE9A088243T1;Parent=OE9A088243;Name=OE9A088243T1;product=OE9A088243P1;Description=ankyrin repeat-containing ITN1-like isoform X1;Ontology_term=GO:0016021
OE9A035049	4.52244	4.25411	1.11276	3.82302	0.000131829	0.00086792	OE9A035049	ID=OE9A035049T1;Parent=OE9A035049;Name=OE9A035049T1;product=OE9A035049P1;Description=shikimate O-hydroxycinnamoyltransferase-like;Ontology_term=GO:0016747
OE9A097896	2.64069	4.25294	1.74616	2.4356	0.0148672	0.0467422	OE9A097896	ID=OE9A097896T1;Parent=OE9A097896;Name=OE9A097896T1;product=OE9A097896P1;Description=calcium-transporting ATPase 4, endoplasmic reticulum-type-like;Ontology_term=GO:0005524%2C GO:0005783%2C GO:0005887%2C GO:0019829%2C GO:0046872%2C GO:0098655
OE9A008166	1.66082	4.25226	1.70066	2.50036	0.0124067	0.0403912	OE9A008166	ID=OE9A008166T1;Parent=OE9A008166;Name=OE9A008166T1;product=OE9A008166P1;Description=proton pump-interactor 1-like;Ontology_term=GO:0016020%2C GO:0044464
OE9A088075	9.21348	4.25134	0.838168	5.07219	3.93274e-07	5.1172e-06	OE9A088075	ID=OE9A088075T1;Parent=OE9A088075;Name=OE9A088075T1;product=OE9A088075P1;Description=ankyrin repeat-containing BDA1-like;Ontology_term=GO:0016020
OE9A080512	112.005	4.25131	0.449294	9.46221	3.01502e-21	6.25402e-19	OE9A080512	ID=OE9A080512T1;Parent=OE9A080512;Name=OE9A080512T1;product=OE9A080512P1
OE9A116643	3.05744	4.2474	1.84884	2.29733	0.0215999	0.063151	OE9A116643	ID=OE9A116643T1;Parent=OE9A116643;Name=OE9A116643T1;product=OE9A116643P1;Description=abscisic acid 8 -hydroxylase 1-like;Ontology_term=GO:0004497%2C GO:0005506%2C GO:0016705%2C GO:0020037%2C GO:0055114
OE9A008041	1.4315	4.2421	1.71132	2.47885	0.0131807	0.0424679	OE9A008041	ID=OE9A008041T1;Parent=OE9A008041;Name=OE9A008041T1;product=OE9A008041P1;Description=probable calcium-binding CML16;Ontology_term=GO:0005509
OE9A073913	2.54543	4.24172	1.82273	2.32712	0.0199587	0.0592804	OE9A073913	ID=OE9A073913T1;Parent=OE9A073913;Name=OE9A073913T1;product=OE9A073913P1
OE9A029518	3.36008	4.24171	1.42602	2.97451	0.00293457	0.0123231	OE9A029518	ID=OE9A029518T1;Parent=OE9A029518;Name=OE9A029518T1;product=OE9A029518P1
OE9A015185	1.05199	4.23799	1.79331	2.36323	0.0181166	0.0548493	OE9A015185	ID=OE9A015185T1;Parent=OE9A015185;Name=OE9A015185T1;product=OE9A015185P1;Description=dentin sialophospho -like;Ontology_term=GO:0003677
OE9A049371	1.57577	4.23209	1.74108	2.43072	0.0150687	0.0472845	OE9A049371	ID=OE9A049371T3;Parent=OE9A049371;Name=OE9A049371T3;product=OE9A049371P2;Description=beta-glucosidase-like;Ontology_term=GO:0004553%2C GO:0005975
OE9A040657	1.37854	4.23139	1.66194	2.54606	0.0108948	0.0363584	OE9A040657	ID=OE9A040657T1;Parent=OE9A040657;Name=OE9A040657T1;product=OE9A040657P1;Description=pentatricopeptide repeat-containing At4g25270, chloroplastic;Ontology_term=GO:0005515
OE9A016874	2.72982	4.23035	1.41752	2.98433	0.00284202	0.0120071	OE9A016874	ID=OE9A016874T1;Parent=OE9A016874;Name=OE9A016874T1;product=OE9A016874P1
OE9A083122	26.8994	4.22957	0.597984	7.07305	1.51562e-12	6.6504e-11	OE9A083122	ID=OE9A083122T1;Parent=OE9A083122;Name=OE9A083122T1;product=OE9A083122P1;Description=LRR receptor-like serine threonine- kinase GSO1;Ontology_term=GO:0005515
OE9A022808	213.581	4.22752	0.39752	10.6347	2.05406e-26	1.00946e-23	OE9A022808	ID=OE9A022808T1;Parent=OE9A022808;Name=OE9A022808T1;product=OE9A022808P1;Description=rust resistance kinase Lr10-like;Ontology_term=GO:0004672%2C GO:0005524%2C GO:0006468
OE9A056161	2.20831	4.22695	1.98663	2.1277	0.0333621	0.0889656	OE9A056161	ID=OE9A056161T1;Parent=OE9A056161;Name=OE9A056161T1;product=OE9A056161P1
OE9pt000060	205.527	4.22614	0.333427	12.6748	8.15241e-37	1.62763e-33	OE9pt000060	ID=OE9pt000060T1;Parent=OE9pt000060;product=OE9pt000060P1;Description=rps19
OE9A037897	13.2973	4.22217	0.912787	4.62558	3.73548e-06	3.7678e-05	OE9A037897	ID=OE9A037897T1;Parent=OE9A037897;Name=OE9A037897T1;product=OE9A037897P1
OE9A056887	16.3176	4.22153	0.755441	5.58817	2.29479e-08	4.06346e-07	OE9A056887	ID=OE9A056887T1;Parent=OE9A056887;Name=OE9A056887T1;product=OE9A056887P1
OE9A064231	1.34731	4.22096	1.85168	2.27953	0.0226354	0.0655663	OE9A064231	ID=OE9A064231T1;Parent=OE9A064231;Name=OE9A064231T1;product=OE9A064231P1;Description=Erythronate-4-phosphate dehydrogenase family;Ontology_term=GO:0005829%2C GO:0006090%2C GO:0006544%2C GO:0006563%2C GO:0006566%2C GO:0016021%2C GO:0016618%2C GO:0030267%2C GO:0046487
OE9A078127	1.55888	4.22051	1.54308	2.73512	0.00623581	0.0229622	OE9A078127	ID=OE9A078127T1;Parent=OE9A078127;Name=OE9A078127T1;product=OE9A078127P1
OE9A037352	3.67716	4.22022	1.20981	3.48833	0.000486047	0.00266958	OE9A037352	ID=OE9A037352T1;Parent=OE9A037352;Name=OE9A037352T1;product=OE9A037352P1
OE9A002859	0.989094	4.21642	1.89592	2.22395	0.0261518	0.0735122	OE9A002859	ID=OE9A002859T1;Parent=OE9A002859;Name=OE9A002859T1;product=OE9A002859P1;Description=ORF40s (chloroplast);Ontology_term=GO:0009507
OE9A010886	1.33514	4.21229	1.7756	2.37232	0.0176768	0.0537882	OE9A010886	ID=OE9A010886T1;Parent=OE9A010886;Name=OE9A010886T1;product=OE9A010886P1;Description=NAC domain-containing 72-like;Ontology_term=GO:0003677%2C GO:0006355
OE9A068999	1.4498	4.21198	1.8056	2.33274	0.019662	0.058579	OE9A068999	ID=OE9A068999T1;Parent=OE9A068999;Name=OE9A068999T1;product=OE9A068999P1;Description=heme oxygenase 1, chloroplastic-like;Ontology_term=GO:0004392%2C GO:0006788%2C GO:0015994
OE9A045282	2.8723	4.20714	1.60461	2.62191	0.00874381	0.0302712	OE9A045282	ID=OE9A045282T1;Parent=OE9A045282;Name=OE9A045282T1;product=OE9A045282P1;Description=wall-associated receptor kinase-like 6;Ontology_term=GO:0004672%2C GO:0005509%2C GO:0005515%2C GO:0005524%2C GO:0006468%2C GO:0030247
OE9A083212	3.10622	4.20692	1.41436	2.97444	0.00293523	0.0123243	OE9A083212	ID=OE9A083212T1;Parent=OE9A083212;Name=OE9A083212T1;product=OE9A083212P1
OE9A017037	2.20849	4.20622	1.92931	2.18017	0.0292451	0.0802788	OE9A017037	ID=OE9A017037T1;Parent=OE9A017037;Name=OE9A017037T1;product=OE9A017037P1;Description=myb-related Myb4;Ontology_term=GO:0003677
OE9A092131	11.7294	4.20372	0.723453	5.81063	6.22381e-09	1.2364e-07	OE9A092131	ID=OE9A092131T1;Parent=OE9A092131;Name=OE9A092131T1;product=OE9A092131P1
OE9A006265	3.35408	4.20283	1.26392	3.32523	0.000883451	0.00447242	OE9A006265	ID=OE9A006265T1;Parent=OE9A006265;Name=OE9A006265T1;product=OE9A006265P1;Description=LRR receptor kinase BAK1;Ontology_term=GO:0004672%2C GO:0005524%2C GO:0006468%2C GO:0016020
OE9D001484	1.29576	4.20189	1.94537	2.15994	0.0307773	0.0834946	OE9D001484	ID=OE9D001484T1;Parent=OE9D001484;product=OE9D001484P1;Description=VAN3-binding -like;Ontology_term=GO:0016021;
OE9A087157	63.6332	4.20106	0.89625	4.68737	2.76733e-06	2.8804e-05	OE9A087157	ID=OE9A087157T1;Parent=OE9A087157;Name=OE9A087157T1;product=OE9A087157P1;Description=vetispiradiene synthase 2-like;Ontology_term=GO:0000287%2C GO:0008152%2C GO:0010333
OE9A085348	1.66822	4.19955	1.80819	2.32251	0.0202053	0.0598958	OE9A085348	ID=OE9A085348T1;Parent=OE9A085348;Name=OE9A085348T1;product=OE9A085348P1
OE9A065745	2.82911	4.19602	1.32457	3.16785	0.00153571	0.0071501	OE9A065745	ID=OE9A065745T1;Parent=OE9A065745;Name=OE9A065745T1;product=OE9A065745P1
OE9A032452	1.65366	4.19334	1.91775	2.1866	0.0287721	0.0792938	OE9A032452	ID=OE9A032452T1;Parent=OE9A032452;Name=OE9A032452T1;product=OE9A032452P1;Description=GEM 5;Ontology_term=GO:0009793%2C GO:0010029%2C GO:0098755
OE9A092022	1.63628	4.19251	1.87977	2.23033	0.0257255	0.0725758	OE9A092022	ID=OE9A092022T1;Parent=OE9A092022;Name=OE9A092022T1;product=OE9A092022P1
OE9A056470	562023	4.18881	0.535833	7.81739	5.39305e-15	3.88008e-13	OE9A056470	ID=OE9A056470T1;Parent=OE9A056470;Name=OE9A056470T1;product=OE9A056470P1
OE9A009225	2.24688	4.18451	1.62926	2.56835	0.0102184	0.0344139	OE9A009225	ID=OE9A009225T1;Parent=OE9A009225;Name=OE9A009225T1;product=OE9A009225P1;Description=SENSITIVE TO PROTON RHIZOTOXICITY 2-like;Ontology_term=GO:0003676%2C GO:0046872
OE9A051060	1.24744	4.18183	1.62239	2.57757	0.00994981	0.033662	OE9A051060	ID=OE9A051060T1;Parent=OE9A051060;Name=OE9A051060T1;product=OE9A051060P1;Description=helicase-like transcription factor CHR28 isoform X1;Ontology_term=GO:0005524
OE9A111170	1.5754	4.18126	2.01801	2.07197	0.0382683	0.0988139	OE9A111170	ID=OE9A111170T1;Parent=OE9A111170;Name=OE9A111170T1;product=OE9A111170P1
OE9A037667	2975.45	4.18045	0.526353	7.94229	1.98477e-15	1.593e-13	OE9A037667	ID=OE9A037667T1;Parent=OE9A037667;Name=OE9A037667T1;product=OE9A037667P1
OE9A071391	32.2277	4.17876	0.746498	5.59782	2.17067e-08	3.8608e-07	OE9A071391	ID=OE9A071391T1;Parent=OE9A071391;Name=OE9A071391T1;product=OE9A071391P1;Description=sodium calcium exchanger NCL2-like;Ontology_term=GO:0005509%2C GO:0016021%2C GO:0055085
OE9A072320	23870.3	4.17376	0.582731	7.16241	7.92725e-13	3.6753e-11	OE9A072320	ID=OE9A072320T1;Parent=OE9A072320;Name=OE9A072320T1;product=OE9A072320P1;Description=thioredoxin 4B;Ontology_term=GO:0000245%2C GO:0005681%2C GO:0005682%2C GO:0046540
OE9A109300	1.95501	4.17331	2.00989	2.07638	0.0378585	0.098024	OE9A109300	ID=OE9A109300T1;Parent=OE9A109300;Name=OE9A109300T1;product=OE9A109300P1;Description=peroxidase 29;Ontology_term=GO:0004601%2C GO:0006804%2C GO:0006979%2C GO:0009505%2C GO:0009664%2C GO:0020037%2C GO:0055114
OE9A120407	2.17672	4.16982	1.7249	2.41743	0.0156304	0.0487119	OE9A120407	ID=OE9A120407T1;Parent=OE9A120407;Name=OE9A120407T1;product=OE9A120407P1
OE9A038433	2.40855	4.1691	1.77156	2.35335	0.0186053	0.0559893	OE9A038433	ID=OE9A038433T1;Parent=OE9A038433;Name=OE9A038433T1;product=OE9A038433P1
OE9A103601	2.11832	4.16771	1.67124	2.49378	0.0126391	0.0410268	OE9A103601	ID=OE9A103601T1;Parent=OE9A103601;Name=OE9A103601T1;product=OE9A103601P1
OE9A030893	2.84422	4.16728	1.27005	3.28119	0.0010337	0.00511842	OE9A030893	ID=OE9A030893T1;Parent=OE9A030893;Name=OE9A030893T1;product=OE9A030893P1
OE9A083916	149.839	4.16506	0.887816	4.69136	2.71395e-06	2.83222e-05	OE9A083916	ID=OE9A083916T1;Parent=OE9A083916;Name=OE9A083916T1;product=OE9A083916P1
OE9A068863	1.46835	4.16294	1.96519	2.11834	0.034146	0.0905946	OE9A068863	ID=OE9A068863T1;Parent=OE9A068863;Name=OE9A068863T1;product=OE9A068863P1;Description=Fanconi anemia group J homolog;Ontology_term=GO:0003677%2C GO:0004003%2C GO:0005524%2C GO:0005657%2C GO:0006139
OE9A086631	5.83215	4.1629	1.05558	3.9437	8.02337e-05	0.000562922	OE9A086631	ID=OE9A086631T1;Parent=OE9A086631;Name=OE9A086631T1;product=OE9A086631P1;Description=jasmonate O-methyltransferase-like;Ontology_term=GO:0008168
OE9A044443	6.00338	4.16102	1.15611	3.59915	0.000319265	0.0018553	OE9A044443	ID=OE9A044443T1;Parent=OE9A044443;Name=OE9A044443T1;product=OE9A044443P1;Description=calcium-transporting ATPase 13, plasma membrane-type;Ontology_term=GO:0000166%2C GO:0016021%2C GO:0046872
OE9A060699	2.07029	4.16059	1.5511	2.68234	0.00731092	0.0262287	OE9A060699	ID=OE9A060699T1;Parent=OE9A060699;Name=OE9A060699T1;product=OE9A060699P1;Description=nuclear transcription factor Y subunit B-3-like;Ontology_term=GO:0005634%2C GO:0006355%2C GO:0043565%2C GO:0046982
OE9A013205	1.30862	4.15997	1.91851	2.16833	0.0301333	0.0821593	OE9A013205	ID=OE9A013205T1;Parent=OE9A013205;Name=OE9A013205T1;product=OE9A013205P1;Description=REVERSION-TO-ETHYLENE SENSITIVITY1;Ontology_term=GO:0005783%2C GO:0005794%2C GO:0010105%2C GO:0016021
OE9A110557	649.951	4.15932	0.443153	9.38574	6.24791e-21	1.23199e-18	OE9A110557	ID=OE9A110557T1;Parent=OE9A110557;Name=OE9A110557T1;product=OE9A110557P1;Description=premnaspirodiene oxygenase-like;Ontology_term=GO:0004497%2C GO:0005506%2C GO:0016705%2C GO:0020037%2C GO:0055114
OE9A055208	10.9682	4.15905	1.03118	4.0333	5.49997e-05	0.000403887	OE9A055208	ID=OE9A055208T1;Parent=OE9A055208;Name=OE9A055208T1;product=OE9A055208P1;Description=L-type lectin-domain containing receptor kinase -like;Ontology_term=GO:0004672%2C GO:0005524%2C GO:0006468%2C GO:0016020%2C GO:0030246
OE9A073614	15.0548	4.15728	0.792689	5.24453	1.56685e-07	2.25965e-06	OE9A073614	ID=OE9A073614T1;Parent=OE9A073614;Name=OE9A073614T1;product=OE9A073614P1;Description=peroxidase N1-like;Ontology_term=GO:0004601%2C GO:0005576%2C GO:0006804%2C GO:0006979%2C GO:0020037%2C GO:0042744%2C GO:0046872%2C GO:0055114%2C GO:0098869
OE9A033958	1.07323	4.15459	1.9846	2.09341	0.0363128	0.0949477	OE9A033958	ID=OE9A033958T1;Parent=OE9A033958;Name=OE9A033958T1;product=OE9A033958P1
OE9A000366	1.02201	4.15371	1.9874	2.09002	0.0366162	0.0955689	OE9A000366	ID=OE9A000366T1;Parent=OE9A000366;Name=OE9A000366T1;product=OE9A000366P1
OE9A065626	1.15676	4.153	1.98867	2.08833	0.036768	0.0958634	OE9A065626	ID=OE9A065626T1;Parent=OE9A065626;Name=OE9A065626T1;product=OE9A065626P1;Description=Small auxin-up RNA;Ontology_term=GO:0009733
OE9A104290	2.17421	4.14605	1.89193	2.19145	0.0284194	0.0784913	OE9A104290	ID=OE9A104290T1;Parent=OE9A104290;Name=OE9A104290T1;product=OE9A104290P1;Description=probable pectinesterase 67;Ontology_term=GO:0005618%2C GO:0005982%2C GO:0005985%2C GO:0030599%2C GO:0042545%2C GO:0045330%2C GO:0045490
OE9A102952	1.5351	4.14588	1.53708	2.69724	0.00699171	0.0252394	OE9A102952	ID=OE9A102952T1;Parent=OE9A102952;Name=OE9A102952T1;product=OE9A102952P1
OE9A113311	3.14709	4.14395	1.44931	2.85926	0.00424631	0.0167524	OE9A113311	ID=OE9A113311T2;Parent=OE9A113311;Name=OE9A113311T2;product=OE9A113311P2;Description=ADP-ribosylation factor-related 1;Ontology_term=GO:0005525%2C GO:0005622%2C GO:0007264
OE9A075288	508.181	4.14352	0.420262	9.85939	6.24284e-23	1.7341e-20	OE9A075288	ID=OE9A075288T1;Parent=OE9A075288;Name=OE9A075288T1;product=OE9A075288P1;Description=high-affinity nitrate transporter -like;Ontology_term=GO:0010167%2C GO:0015706%2C GO:0016021
OE9A015858	44.3285	4.14086	0.516537	8.01658	1.08727e-15	9.26179e-14	OE9A015858	ID=OE9A015858T1;Parent=OE9A015858;Name=OE9A015858T1;product=OE9A015858P1;Description=RPM1-interacting 4-like;Ontology_term=GO:0050896
OE9A066018	8.14448	4.13981	0.913928	4.52969	5.90697e-06	5.67155e-05	OE9A066018	ID=OE9A066018T1;Parent=OE9A066018;Name=OE9A066018T1;product=OE9A066018P1;Description=B3 domain-containing At5g60140-like;Ontology_term=GO:0003677
OE9A065861	3.82578	4.13631	1.21635	3.40058	0.000672418	0.00353343	OE9A065861	ID=OE9A065861T1;Parent=OE9A065861;Name=OE9A065861T1;product=OE9A065861P1;Description=adenosylhomocysteinase;Ontology_term=GO:0004013%2C GO:0006555%2C GO:0006730%2C GO:0019510%2C GO:0051287
OE9A089188	11.6433	4.13472	1.03077	4.0113	6.0386e-05	0.00043948	OE9A089188	ID=OE9A089188T1;Parent=OE9A089188;Name=OE9A089188T1;product=OE9A089188P1
OE9A083489	53.3176	4.13175	0.364422	11.3378	8.52413e-30	7.46053e-27	OE9A083489	ID=OE9A083489T1;Parent=OE9A083489;Name=OE9A083489T1;product=OE9A083489P1;Description=long chain base biosynthesis 1 isoform X1;Ontology_term=GO:0003824%2C GO:0005783%2C GO:0009058%2C GO:0016021%2C GO:0016049%2C GO:0030170%2C GO:0043067
OE9A027716	1.515	4.13079	1.65551	2.49518	0.0125894	0.0409028	OE9A027716	ID=OE9A027716T1;Parent=OE9A027716;Name=OE9A027716T1;product=OE9A027716P1;Description=probable pectinesterase pectinesterase inhibitor 17;Ontology_term=GO:0003676%2C GO:0005576%2C GO:0005618%2C GO:0005982%2C GO:0005985%2C GO:0015074%2C GO:0030599%2C GO:0042545%2C GO:0043086%2C GO:0045330%2C GO:0045490%2C GO:0046910
OE9A010812	5.34564	4.1284	1.29915	3.17776	0.00148418	0.00695067	OE9A010812	ID=OE9A010812T1;Parent=OE9A010812;Name=OE9A010812T1;product=OE9A010812P1;Description=F-box At3g17265 isoform X2;Ontology_term=GO:0005515
OE9A022786	2.44153	4.1281	1.21391	3.40066	0.000672239	0.00353307	OE9A022786	ID=OE9A022786T1;Parent=OE9A022786;Name=OE9A022786T1;product=OE9A022786P1;Description=Nucleotide-diphospho-sugar transferase;Ontology_term=GO:0005794%2C GO:0016020%2C GO:0016740
OE9A051853	1.80366	4.12538	1.76821	2.33308	0.0196437	0.0585409	OE9A051853	ID=OE9A051853T1;Parent=OE9A051853;Name=OE9A051853T1;product=OE9A051853P1;Description=omega-hydroxypalmitate O-feruloyl transferase-like;Ontology_term=GO:0050366
OE9A074203	1.99256	4.12515	1.59392	2.58806	0.00965188	0.0328384	OE9A074203	ID=OE9A074203T1;Parent=OE9A074203;Name=OE9A074203T1;product=OE9A074203P1
OE9A067307	11.1339	4.12391	1.01764	4.05244	5.06853e-05	0.000375659	OE9A067307	ID=OE9A067307T1;Parent=OE9A067307;Name=OE9A067307T1;product=OE9A067307P1
OE9A050718	2.15252	4.12238	1.91346	2.15441	0.0312079	0.0844691	OE9A050718	ID=OE9A050718T1;Parent=OE9A050718;Name=OE9A050718T1;product=OE9A050718P1
OE9A040110	3.33122	4.12128	1.71111	2.40855	0.0160162	0.0496335	OE9A040110	ID=OE9A040110T1;Parent=OE9A040110;Name=OE9A040110T1;product=OE9A040110P1;Description=alpha tubulin, partial;Ontology_term=GO:0003924%2C GO:0005200%2C GO:0005525%2C GO:0005737%2C GO:0005874%2C GO:0007017
OE9A039462	2.88759	4.11971	1.87753	2.19422	0.0282197	0.078095	OE9A039462	ID=OE9A039462T1;Parent=OE9A039462;Name=OE9A039462T1;product=OE9A039462P1
OE9A023348	399314	4.11921	0.544998	7.55821	4.08667e-14	2.47712e-12	OE9A023348	ID=OE9A023348T1;Parent=OE9A023348;Name=OE9A023348T1;product=OE9A023348P1
OE9A046380	42.3897	4.11529	0.691334	5.95268	2.63787e-09	5.66672e-08	OE9A046380	ID=OE9A046380T1;Parent=OE9A046380;Name=OE9A046380T1;product=OE9A046380P1;Description=cytochrome P450 71A6-like;Ontology_term=GO:0005506%2C GO:0016705%2C GO:0020037%2C GO:0055114
OE9A092483	112.909	4.11488	0.781692	5.26407	1.40902e-07	2.05994e-06	OE9A092483	ID=OE9A092483T1;Parent=OE9A092483;Name=OE9A092483T1;product=OE9A092483P1;Description=universal stress A;Ontology_term=GO:0006950
OE9A003975	93.6109	4.11118	0.792116	5.19012	2.10157e-07	2.92389e-06	OE9A003975	ID=OE9A003975T1;Parent=OE9A003975;Name=OE9A003975T1;product=OE9A003975P1
OE9A046262	19.2345	4.10971	1.05855	3.8824	0.00010343	0.00070372	OE9A046262	ID=OE9A046262T1;Parent=OE9A046262;Name=OE9A046262T1;product=OE9A046262P1;Description=polyphenol oxidase, chloroplastic-like;Ontology_term=GO:0004097%2C GO:0006118%2C GO:0006570%2C GO:0046148%2C GO:0055114
OE9A052325	37.8042	4.10712	0.611308	6.71858	1.83502e-11	6.34393e-10	OE9A052325	ID=OE9A052325T1;Parent=OE9A052325;Name=OE9A052325T1;product=OE9A052325P1;Description=probable WRKY transcription factor 50;Ontology_term=GO:0003700%2C GO:0005667%2C GO:0006355%2C GO:0043565%2C GO:0045449
OE9A049917	9.67777	4.10606	0.992119	4.13868	3.49308e-05	0.000271954	OE9A049917	ID=OE9A049917T1;Parent=OE9A049917;Name=OE9A049917T1;product=OE9A049917P1;Description=uncharacterized protein LOC111366987;Ontology_term=GO:0016020
OE9A116396	50.7609	4.10208	0.656392	6.24943	4.11956e-10	1.06383e-08	OE9A116396	ID=OE9A116396T1;Parent=OE9A116396;Name=OE9A116396T1;product=OE9A116396P1;Description=probable calcium-binding CML44;Ontology_term=GO:0005509
OE9A037738	14.1377	4.10108	0.823568	4.97965	6.36992e-07	7.80816e-06	OE9A037738	ID=OE9A037738T1;Parent=OE9A037738;Name=OE9A037738T1;product=OE9A037738P1
OE9A111540	1.66848	4.09881	1.70937	2.39785	0.0164916	0.0508451	OE9A111540	ID=OE9A111540T1;Parent=OE9A111540;Name=OE9A111540T1;product=OE9A111540P1;Description=F-box At1g67623;Ontology_term=GO:0005515
OE9A093824	118.735	4.09466	0.897938	4.56008	5.11352e-06	4.98463e-05	OE9A093824	ID=OE9A093824T1;Parent=OE9A093824;Name=OE9A093824T1;product=OE9A093824P1;Description=cytochrome P450 71A6-like;Ontology_term=GO:0005506%2C GO:0016705%2C GO:0020037%2C GO:0055114
OE9A101156	5.23016	4.09433	1.68448	2.43062	0.0150729	0.0472881	OE9A101156	ID=OE9A101156T1;Parent=OE9A101156;Name=OE9A101156T1;product=OE9A101156P1
OE9A039781	77.8529	4.08885	0.656513	6.22813	4.72024e-10	1.20434e-08	OE9A039781	ID=OE9A039781T1;Parent=OE9A039781;Name=OE9A039781T1;product=OE9A039781P1;Description=wall-associated receptor kinase-like 14;Ontology_term=GO:0004674%2C GO:0005524%2C GO:0005886%2C GO:0006468%2C GO:0007166%2C GO:0009069%2C GO:0030247
OE9A084226	4.29898	4.08752	1.14531	3.56892	0.000358458	0.0020484	OE9A084226	ID=OE9A084226T1;Parent=OE9A084226;Name=OE9A084226T1;product=OE9A084226P1
OE9A081507	9.52315	4.08749	0.880889	4.64019	3.48082e-06	3.54095e-05	OE9A081507	ID=OE9A081507T1;Parent=OE9A081507;Name=OE9A081507T1;product=OE9A081507P1;Description=E3 ubiquitin- ligase PUB24-like;Ontology_term=GO:0004842%2C GO:0005488%2C GO:0016567
OE9A035629	8.57928	4.08469	1.15991	3.52155	0.000429027	0.00239428	OE9A035629	ID=OE9A035629T1;Parent=OE9A035629;Name=OE9A035629T1;product=OE9A035629P1;Description=probable glutathione S-transferase;Ontology_term=GO:0004364%2C GO:0005515%2C GO:0005737%2C GO:0006749%2C GO:0006803%2C GO:0009407
OE9A106923	90.5385	4.08405	0.556651	7.33682	2.18724e-13	1.13424e-11	OE9A106923	ID=OE9A106923T1;Parent=OE9A106923;Name=OE9A106923T1;product=OE9A106923P1
OE9A001737	76.001	4.08241	0.797532	5.11881	3.07468e-07	4.11469e-06	OE9A001737	ID=OE9A001737T1;Parent=OE9A001737;Name=OE9A001737T1;product=OE9A001737P1;Description=PLANT CADMIUM RESISTANCE 2-like;Ontology_term=GO:0016021
OE9A012828	15.3486	4.08089	0.687194	5.93848	2.87681e-09	6.1061e-08	OE9A012828	ID=OE9A012828T1;Parent=OE9A012828;Name=OE9A012828T1;product=OE9A012828P1
OE9A056019	13.4798	4.0783	0.771579	5.28566	1.2525e-07	1.85661e-06	OE9A056019	ID=OE9A056019T1;Parent=OE9A056019;Name=OE9A056019T1;product=OE9A056019P1;Description=Ulp1 protease family, C-terminal catalytic domain containing;Ontology_term=GO:0006508%2C GO:0008234
OE9A119495	1.1717	4.07671	1.89375	2.15272	0.0313405	0.0847275	OE9A119495	ID=OE9A119495T1;Parent=OE9A119495;Name=OE9A119495T1;product=OE9A119495P1
OE9A074244	12.8791	4.07539	0.87168	4.67532	2.93491e-06	3.04689e-05	OE9A074244	ID=OE9A074244T1;Parent=OE9A074244;Name=OE9A074244T1;product=OE9A074244P1;Description=cannabidiolic acid synthase-like;Ontology_term=GO:0016614%2C GO:0050660%2C GO:0055114
OE9A109323	247.928	4.07526	0.675034	6.03712	1.56886e-09	3.53924e-08	OE9A109323	ID=OE9A109323T1;Parent=OE9A109323;Name=OE9A109323T1;product=OE9A109323P1;Description=Serine threonine kinase;Ontology_term=GO:0004674%2C GO:0005509%2C GO:0005515%2C GO:0005524%2C GO:0006468%2C GO:0009069%2C GO:0016021%2C GO:0030247
OE9A035059	6.70714	4.07388	0.889372	4.58063	4.63587e-06	4.55937e-05	OE9A035059	ID=OE9A035059T1;Parent=OE9A035059;Name=OE9A035059T1;product=OE9A035059P1
OE9A105698	58.2166	4.07116	0.676439	6.01852	1.7602e-09	3.93752e-08	OE9A105698	ID=OE9A105698T1;Parent=OE9A105698;Name=OE9A105698T1;product=OE9A105698P1;Description=cytochrome P450 81E8-like;Ontology_term=GO:0005506%2C GO:0016021%2C GO:0016709%2C GO:0020037%2C GO:0042343%2C GO:0044550%2C GO:0055114%2C GO:0098542
OE9A052778	1.89454	4.07107	1.8392	2.2135	0.0268635	0.0750964	OE9A052778	ID=OE9A052778T1;Parent=OE9A052778;Name=OE9A052778T1;product=OE9A052778P1;Description=dnaJ ERDJ3B;Ontology_term=GO:0006457%2C GO:0051082
OE9A053659	3.28622	4.0708	1.46068	2.78693	0.00532108	0.0201944	OE9A053659	ID=OE9A053659T1;Parent=OE9A053659;Name=OE9A053659T1;product=OE9A053659P1;Description=ethylene-responsive transcription factor ABI4;Ontology_term=GO:0003677%2C GO:0003700%2C GO:0005667%2C GO:0006355%2C GO:0044699%2C GO:0045449%2C GO:1901700
OE9A063903	2.93771	4.06995	1.26208	3.22479	0.00126063	0.00606106	OE9A063903	ID=OE9A063903T1;Parent=OE9A063903;Name=OE9A063903T1;product=OE9A063903P1
OE9A069627	2.65709	4.06962	1.95005	2.08693	0.0368945	0.0961226	OE9A069627	ID=OE9A069627T1;Parent=OE9A069627;Name=OE9A069627T1;product=OE9A069627P1;Description=delta(12)-acyl-lipid-desaturase-like;Ontology_term=GO:0006629%2C GO:0016021%2C GO:0016717%2C GO:0055114
OE9A103408	3.38829	4.06919	1.24376	3.27169	0.00106906	0.00526765	OE9A103408	ID=OE9A103408T1;Parent=OE9A103408;Name=OE9A103408T1;product=OE9A103408P1;Description=probable leucine-rich repeat receptor kinase At1g68400;Ontology_term=GO:0004672%2C GO:0005524%2C GO:0006468
OE9A000763	2.33431	4.06865	1.774	2.29349	0.02182	0.0636838	OE9A000763	ID=OE9A000763T1;Parent=OE9A000763;Name=OE9A000763T1;product=OE9A000763P1
OE9A066703	2.30197	4.06747	1.71019	2.37838	0.0173888	0.0530533	OE9A066703	ID=OE9A066703T1;Parent=OE9A066703;Name=OE9A066703T1;product=OE9A066703P1;Description=serine threonine- kinase 2 19-like;Ontology_term=GO:0004674%2C GO:0005524%2C GO:0005634%2C GO:0005737%2C GO:0006468%2C GO:0009069%2C GO:0035556
OE9A032004	1.90909	4.0663	1.59703	2.54617	0.0108912	0.0363501	OE9A032004	ID=OE9A032004T1;Parent=OE9A032004;Name=OE9A032004T1;product=OE9A032004P1;Description=E3 ubiquitin ligase BIG BROTHER-related-like;Ontology_term=GO:0005515%2C GO:0008270
OE9A102520	3.94039	4.06594	1.23403	3.29486	0.0009847	0.00490798	OE9A102520	ID=OE9A102520T1;Parent=OE9A102520;Name=OE9A102520T1;product=OE9A102520P1
OE9A101769	4.79885	4.06581	1.01572	4.00287	6.25785e-05	0.000453496	OE9A101769	ID=OE9A101769T1;Parent=OE9A101769;Name=OE9A101769T1;product=OE9A101769P1;Description=Ulp1 protease family, C-terminal catalytic domain containing;Ontology_term=GO:0006508%2C GO:0008234
OE9A021402	1.841	4.06445	1.63927	2.47943	0.0131593	0.0424178	OE9A021402	ID=OE9A021402T1;Parent=OE9A021402;Name=OE9A021402T1;product=OE9A021402P1;Description=(-)-germacrene D synthase;Ontology_term=GO:0000287%2C GO:0008152%2C GO:0010333
OE9A087811	13.5317	4.06411	0.761145	5.33947	9.32176e-08	1.42681e-06	OE9A087811	ID=OE9A087811T1;Parent=OE9A087811;Name=OE9A087811T1;product=OE9A087811P1;Description=probable boron transporter 7;Ontology_term=GO:0005452%2C GO:0006821%2C GO:0015701%2C GO:0016021
OE9A080685	26.8559	4.06083	0.604413	6.71862	1.83448e-11	6.34393e-10	OE9A080685	ID=OE9A080685T1;Parent=OE9A080685;Name=OE9A080685T1;product=OE9A080685P1;Description=auxin-responsive SAUR36-like;Ontology_term=GO:0009733
OE9A055417	6.73853	4.06062	1.21066	3.35404	0.0007964	0.00409204	OE9A055417	ID=OE9A055417T1;Parent=OE9A055417;Name=OE9A055417T1;product=OE9A055417P1;Description=G-type lectin S-receptor-like serine threonine- kinase At1g11300;Ontology_term=GO:0004674%2C GO:0005524%2C GO:0006468%2C GO:0009069%2C GO:0016020%2C GO:0048544
OE9A045932	80.5772	4.05985	0.594213	6.83231	8.35597e-12	3.19668e-10	OE9A045932	ID=OE9A045932T1;Parent=OE9A045932;Name=OE9A045932T1;product=OE9A045932P1
OE9A009884	14.3999	4.05912	0.768543	5.28157	1.28082e-07	1.89506e-06	OE9A009884	ID=OE9A009884T1;Parent=OE9A009884;Name=OE9A009884T1;product=OE9A009884P1
OE9A017410	282099	4.05867	0.526224	7.71282	1.2307e-14	8.36456e-13	OE9A017410	ID=OE9A017410T1;Parent=OE9A017410;Name=OE9A017410T1;product=OE9A017410P1
OE9A011619	6.72223	4.05858	1.43965	2.81915	0.0048151	0.0186057	OE9A011619	ID=OE9A011619T1;Parent=OE9A011619;Name=OE9A011619T1;product=OE9A011619P1
OE9A093852	1.90081	4.05833	1.55853	2.60395	0.0092156	0.031576	OE9A093852	ID=OE9A093852T1;Parent=OE9A093852;Name=OE9A093852T1;product=OE9A093852P1;Description=dihydropyrimidine dehydrogenase (NADP(+)), chloroplastic;Ontology_term=GO:0004152%2C GO:0006212%2C GO:0006222%2C GO:0009570%2C GO:0015940%2C GO:0017113%2C GO:0019482%2C GO:0055114
OE9A029100	96.3789	4.0576	0.860991	4.71271	2.44449e-06	2.58394e-05	OE9A029100	ID=OE9A029100T1;Parent=OE9A029100;Name=OE9A029100T1;product=OE9A029100P1;Description=vetispiradiene synthase 2-like;Ontology_term=GO:0000287%2C GO:0008152%2C GO:0010333
OE9A031167	1.05696	4.05518	1.773	2.28718	0.0221853	0.0645552	OE9A031167	ID=OE9A031167T1;Parent=OE9A031167;Name=OE9A031167T1;product=OE9A031167P1;Description=E3 ubiquitin- ligase RFWD3;Ontology_term=GO:0005515%2C GO:0046872
OE9A006938	3.71245	4.05447	1.24313	3.26149	0.00110828	0.0054349	OE9A006938	ID=OE9A006938T1;Parent=OE9A006938;Name=OE9A006938T1;product=OE9A006938P1;Description=Spermine synthase;Ontology_term=GO:0004766%2C GO:0006525%2C GO:0006560%2C GO:0006596%2C GO:0019482
OE9A118938	3.60526	4.05336	1.12564	3.60096	0.000317047	0.00184443	OE9A118938	ID=OE9A118938T1;Parent=OE9A118938;Name=OE9A118938T1;product=OE9A118938P1;Description=MATE efflux family LAL5-like;Ontology_term=GO:0006118%2C GO:0006855%2C GO:0009055%2C GO:0015238%2C GO:0015297%2C GO:0016021
OE9A059414	10.7715	4.05236	0.852796	4.75185	2.01559e-06	2.17668e-05	OE9A059414	ID=OE9A059414T1;Parent=OE9A059414;Name=OE9A059414T1;product=OE9A059414P1;Description=cell division cycle , cofactor of APC complex-like;Ontology_term=GO:0010997%2C GO:0050790%2C GO:0097027
OE9A108188	136.319	4.05151	0.361769	11.1992	4.11609e-29	3.46012e-26	OE9A108188	ID=OE9A108188T1;Parent=OE9A108188;Name=OE9A108188T1;product=OE9A108188P1;Description=germin 5-1;Ontology_term=GO:0004784%2C GO:0005576%2C GO:0005618%2C GO:0009506%2C GO:0010497%2C GO:0019430%2C GO:0030145%2C GO:0033609%2C GO:0045735%2C GO:0046487%2C GO:0046564%2C GO:0055114%2C GO:2000280
OE9A054350	12.4909	4.05067	0.793795	5.10292	3.3446e-07	4.42401e-06	OE9A054350	ID=OE9A054350T1;Parent=OE9A054350;Name=OE9A054350T1;product=OE9A054350P1;Description=oligopeptide transporter 6;Ontology_term=GO:0016021%2C GO:0055085
OE9A056966	2.25169	4.04933	1.84586	2.19373	0.0282546	0.0781576	OE9A056966	ID=OE9A056966T1;Parent=OE9A056966;Name=OE9A056966T1;product=OE9A056966P1;Description=beta-glucosidase-like;Ontology_term=GO:0005975%2C GO:0008422
OE9A059306	7.98815	4.047	1.24962	3.23859	0.00120121	0.00582447	OE9A059306	ID=OE9A059306T1;Parent=OE9A059306;Name=OE9A059306T1;product=OE9A059306P1;Description=TIFY 5A-like;Ontology_term=GO:0050789
OE9A076253	3.653	4.04668	1.44488	2.80071	0.00509904	0.0194814	OE9A076253	ID=OE9A076253T1;Parent=OE9A076253;Name=OE9A076253T1;product=OE9A076253P1;Description=CASP 1E2;Ontology_term=GO:0005886%2C GO:0016021
OE9A068023	1.9568	4.04592	1.74795	2.31467	0.0206312	0.0608802	OE9A068023	ID=OE9A068023T1;Parent=OE9A068023;Name=OE9A068023T1;product=OE9A068023P1
OE9A020818	701069	4.04582	0.522421	7.74437	9.60574e-15	6.61306e-13	OE9A020818	ID=OE9A020818T1;Parent=OE9A020818;Name=OE9A020818T1;product=OE9A020818P1
OE9D002712	3.56073	4.04562	1.39305	2.90414	0.00368266	0.0149042	OE9D002712	ID=OE9D002712T1;Parent=OE9D002712;product=OE9D002712P1;Description=stomatal closure-related actin-binding 2-like;Ontology_term=GO:0003779;
OE9A016294	2.23939	4.04328	1.5306	2.64163	0.00825076	0.0289025	OE9A016294	ID=OE9A016294T1;Parent=OE9A016294;Name=OE9A016294T1;product=OE9A016294P1
OE9pt000032	140.85	4.03279	0.338731	11.9056	1.10716e-32	1.5377e-29	OE9pt000032	ID=OE9pt000032T1;Parent=OE9pt000032;product=OE9pt000032P1;Description=ycf4
OE9A086054	5.30763	4.03266	1.12779	3.5757	0.000349286	0.00200496	OE9A086054	ID=OE9A086054T1;Parent=OE9A086054;Name=OE9A086054T1;product=OE9A086054P1;Description=LRR receptor-like serine threonine- kinase RCH1;Ontology_term=GO:0004674%2C GO:0005515%2C GO:0005524%2C GO:0006468%2C GO:0009069%2C GO:0016021
OE9A110422	19.6378	4.03231	0.896262	4.49903	6.82632e-06	6.44576e-05	OE9A110422	ID=OE9A110422T1;Parent=OE9A110422;Name=OE9A110422T1;product=OE9A110422P1
OE9D002902	10.344	4.03161	1.18996	3.38803	0.000703961	0.0036768	OE9D002902	ID=OE9D002902T1;Parent=OE9D002902;product=OE9D002902P1;Description=endochitinase EP3-like;Ontology_term=GO:0004568%2C GO:0006032%2C GO:0016998;
OE9A010817	4.35788	4.03082	1.18869	3.39097	0.000696458	0.00364357	OE9A010817	ID=OE9A010817T1;Parent=OE9A010817;Name=OE9A010817T1;product=OE9A010817P1
OE9A065575	156.332	4.02802	0.449679	8.95755	3.31963e-19	5.09819e-17	OE9A065575	ID=OE9A065575T1;Parent=OE9A065575;Name=OE9A065575T1;product=OE9A065575P1;Description=lysine histidine transporter 1-like;Ontology_term=GO:0016021
OE9A000108	4.07826	4.02688	1.37926	2.91959	0.00350492	0.0143136	OE9A000108	ID=OE9A000108T1;Parent=OE9A000108;Name=OE9A000108T1;product=OE9A000108P1;Description=probable LRR receptor-like serine threonine- kinase At3g47570;Ontology_term=GO:0005515
OE9A106246	455.651	4.02665	0.573366	7.02283	2.17426e-12	9.19926e-11	OE9A106246	ID=OE9A106246T1;Parent=OE9A106246;Name=OE9A106246T1;product=OE9A106246P1;Description=glucan endo-1,3-beta-glucosidase, acidic-like;Ontology_term=GO:0004553%2C GO:0005975
OE9A031469	4.91051	4.02567	1.34924	2.98366	0.00284824	0.0120254	OE9A031469	ID=OE9A031469T1;Parent=OE9A031469;Name=OE9A031469T1;product=OE9A031469P1;Description=NRT1 PTR FAMILY -like isoform X1;Ontology_term=GO:0005215%2C GO:0006810%2C GO:0016021
OE9A103619	3.37676	4.02566	1.48232	2.71577	0.00661215	0.0241067	OE9A103619	ID=OE9A103619T1;Parent=OE9A103619;Name=OE9A103619T1;product=OE9A103619P1;Description=probable zinc transporter 10;Ontology_term=GO:0005385%2C GO:0005886%2C GO:0016021%2C GO:0032440%2C GO:0055114%2C GO:0071577
OE9A098981	1.4957	4.02553	1.67997	2.39619	0.0165665	0.0509876	OE9A098981	ID=OE9A098981T1;Parent=OE9A098981;Name=OE9A098981T1;product=OE9A098981P1
OE9A095047	1.70177	4.02539	1.43845	2.79842	0.00513539	0.0196085	OE9A095047	ID=OE9A095047T1;Parent=OE9A095047;Name=OE9A095047T1;product=OE9A095047P1
OE9A086533	2.19844	4.02327	1.48781	2.70416	0.00684765	0.0248203	OE9A086533	ID=OE9A086533T1;Parent=OE9A086533;Name=OE9A086533T1;product=OE9A086533P1;Description=probable WRKY transcription factor 72;Ontology_term=GO:0003700%2C GO:0005667%2C GO:0006355%2C GO:0043565%2C GO:0045449
OE9A116886	2.0454	4.02182	1.29665	3.10171	0.00192408	0.00863582	OE9A116886	ID=OE9A116886T1;Parent=OE9A116886;Name=OE9A116886T1;product=OE9A116886P1;Description=heat shock 70 kDa 15-like;Ontology_term=GO:0000166%2C GO:0016491
OE9A112439	3.28859	4.02053	1.44538	2.78164	0.00540849	0.0204339	OE9A112439	ID=OE9A112439T1;Parent=OE9A112439;Name=OE9A112439T1;product=OE9A112439P1;Description=transcription factor MYB26-like;Ontology_term=GO:0003677
OE9A091269	4.80865	4.01091	1.21381	3.30438	0.00095185	0.0047718	OE9A091269	ID=OE9A091269T1;Parent=OE9A091269;Name=OE9A091269T1;product=OE9A091269P1;Description=myb-related Myb4-like;Ontology_term=GO:0003677
OE9A054836	2.17105	4.00773	1.38452	2.89467	0.00379556	0.0152644	OE9A054836	ID=OE9A054836T1;Parent=OE9A054836;Name=OE9A054836T1;product=OE9A054836P1
OE9A100761	7.58796	4.00755	1.16316	3.44538	0.000570254	0.00305536	OE9A100761	ID=OE9A100761T1;Parent=OE9A100761;Name=OE9A100761T1;product=OE9A100761P1
OE9A092815	2.28083	4.00748	1.62316	2.46894	0.0135512	0.0433921	OE9A092815	ID=OE9A092815T1;Parent=OE9A092815;Name=OE9A092815T1;product=OE9A092815P1;Description=F-box SKIP28;Ontology_term=GO:0005515
OE9A056982	4.23906	4.00588	1.03657	3.86454	0.000111299	0.000750862	OE9A056982	ID=OE9A056982T1;Parent=OE9A056982;Name=OE9A056982T1;product=OE9A056982P1;Description=auxin-responsive SAUR36-like;Ontology_term=GO:0009733
OE9A102859	3.01332	4.00387	1.21159	3.30463	0.000951003	0.0047683	OE9A102859	ID=OE9A102859T1;Parent=OE9A102859;Name=OE9A102859T1;product=OE9A102859P1;Description=G-type lectin S-receptor-like serine threonine- kinase At4g27290 isoform X1;Ontology_term=GO:0004674%2C GO:0005524%2C GO:0006468%2C GO:0009069%2C GO:0016020%2C GO:0048544
OE9A060683	1.9586	4.00277	1.74913	2.28844	0.0221119	0.0644121	OE9A060683	ID=OE9A060683T1;Parent=OE9A060683;Name=OE9A060683T1;product=OE9A060683P1;Description=zinc finger CONSTANS-LIKE 2-like;Ontology_term=GO:0005515
OE9A114372	3.291	4.00167	1.25698	3.18356	0.00145478	0.00683402	OE9A114372	ID=OE9A114372T1;Parent=OE9A114372;Name=OE9A114372T1;product=OE9A114372P1
OE9A090291	2.90237	3.99951	1.20674	3.3143	0.000918731	0.00462828	OE9A090291	ID=OE9A090291T1;Parent=OE9A090291;Name=OE9A090291T1;product=OE9A090291P1;Description=DEAD-box ATP-dependent RNA helicase 28;Ontology_term=GO:0003676%2C GO:0005524
OE9A066034	13.3099	3.9969	0.794876	5.02832	4.94788e-07	6.24477e-06	OE9A066034	ID=OE9A066034T1;Parent=OE9A066034;Name=OE9A066034T1;product=OE9A066034P1;Description=RING-H2 finger ATL16-like;Ontology_term=GO:0005515%2C GO:0008270
OE9A072253	4.32759	3.99491	1.51041	2.64491	0.00817124	0.0286869	OE9A072253	ID=OE9A072253T1;Parent=OE9A072253;Name=OE9A072253T1;product=OE9A072253P1
OE9A062281	11.4378	3.98733	0.744248	5.35753	8.43676e-08	1.31145e-06	OE9A062281	ID=OE9A062281T1;Parent=OE9A062281;Name=OE9A062281T1;product=OE9A062281P1;Description=argonaute 4-like;Ontology_term=GO:0003743%2C GO:0005515%2C GO:0005840%2C GO:0006446
OE9A093853	1.62959	3.9862	1.75097	2.27657	0.0228121	0.0659646	OE9A093853	ID=OE9A093853T1;Parent=OE9A093853;Name=OE9A093853T1;product=OE9A093853P1
OE9A093265	4.12954	3.9851	1.15157	3.46059	0.000538995	0.00291134	OE9A093265	ID=OE9A093265T1;Parent=OE9A093265;Name=OE9A093265T1;product=OE9A093265P1;Description=bifunctional riboflavin biosynthesis RIBA 1, chloroplastic-like;Ontology_term=GO:0008686%2C GO:0009231
OE9A000344	3.70242	3.9847	1.33062	2.99462	0.00274783	0.0116709	OE9A000344	ID=OE9A000344T1;Parent=OE9A000344;Name=OE9A000344T1;product=OE9A000344P1;Description=HOTHEAD-like isoform X1;Ontology_term=GO:0016614%2C GO:0050660%2C GO:0055114
OE9A049505	17.5241	3.98363	1.01265	3.93385	8.35949e-05	0.000583175	OE9A049505	ID=OE9A049505T1;Parent=OE9A049505;Name=OE9A049505T1;product=OE9A049505P1;Description=ethylene-responsive transcription factor ABR1-like;Ontology_term=GO:0003677%2C GO:0003700%2C GO:0005667%2C GO:0006355%2C GO:0045449
OE9A105848	48.242	3.98361	0.593944	6.70705	1.98605e-11	6.80591e-10	OE9A105848	ID=OE9A105848T1;Parent=OE9A105848;Name=OE9A105848T1;product=OE9A105848P1
OE9A012944	1.52514	3.98123	1.63786	2.43074	0.015068	0.0472845	OE9A012944	ID=OE9A012944T1;Parent=OE9A012944;Name=OE9A012944T1;product=OE9A012944P1;Description=bet1-like SNARE 1-1 isoform X1;Ontology_term=GO:0005515%2C GO:0016021
OE9A090321	5.53549	3.98044	0.897383	4.4356	9.18147e-06	8.38219e-05	OE9A090321	ID=OE9A090321T1;Parent=OE9A090321;Name=OE9A090321T1;product=OE9A090321P1;Description=indole-3-pyruvate monooxygenase YUCCA6-like;Ontology_term=GO:0004499%2C GO:0050660%2C GO:0050661%2C GO:0055114
OE9A061663	3.45337	3.97996	1.65589	2.40352	0.0162381	0.0501752	OE9A061663	ID=OE9A061663T1;Parent=OE9A061663;Name=OE9A061663T1;product=OE9A061663P1
OE9A102084	2.94822	3.97808	1.37874	2.8853	0.00391036	0.0156349	OE9A102084	ID=OE9A102084T1;Parent=OE9A102084;Name=OE9A102084T1;product=OE9A102084P1;Description=DMR6-LIKE OXYGENASE 1;Ontology_term=GO:0016491%2C GO:0046872%2C GO:0055114
OE9A038394	1.49441	3.9762	1.4404	2.76047	0.00577174	0.021559	OE9A038394	ID=OE9A038394T1;Parent=OE9A038394;Name=OE9A038394T1;product=OE9A038394P1;Description=thylakoid structural , partial (chloroplast);Ontology_term=GO:0006118%2C GO:0009523%2C GO:0009535%2C GO:0009772%2C GO:0016021%2C GO:0016168%2C GO:0018298%2C GO:0045156
OE9A115343	4.89886	3.97208	1.09178	3.63816	0.000274593	0.00163253	OE9A115343	ID=OE9A115343T1;Parent=OE9A115343;Name=OE9A115343T1;product=OE9A115343P1
OE9A042911	1.84447	3.97183	1.68544	2.35655	0.0184454	0.0556131	OE9A042911	ID=OE9A042911T1;Parent=OE9A042911;Name=OE9A042911T1;product=OE9A042911P1
OE9A025807	485.256	3.97159	0.553934	7.16979	7.51127e-13	3.49435e-11	OE9A025807	ID=OE9A025807T1;Parent=OE9A025807;Name=OE9A025807T1;product=OE9A025807P1
OE9A048292	579.455	3.97032	0.529327	7.50069	6.34831e-14	3.73463e-12	OE9A048292	ID=OE9A048292T1;Parent=OE9A048292;Name=OE9A048292T1;product=OE9A048292P1;Description=abscisic acid receptor PYL4-like;Ontology_term=GO:0004864%2C GO:0004872%2C GO:0005634%2C GO:0005737%2C GO:0009738%2C GO:0010427%2C GO:0043086%2C GO:0080163
OE9A011621	85.8882	3.96904	0.517095	7.67565	1.6458e-14	1.09756e-12	OE9A011621	ID=OE9A011621T1;Parent=OE9A011621;Name=OE9A011621T1;product=OE9A011621P1;Description=probable glycosyltransferase At5g03795;Ontology_term=GO:0016021
OE9A033950	18.2514	3.96886	1.02585	3.86885	0.000109349	0.000738644	OE9A033950	ID=OE9A033950T1;Parent=OE9A033950;Name=OE9A033950T1;product=OE9A033950P1;Description=O-acyltransferase WSD1-like;Ontology_term=GO:0004144%2C GO:0042967%2C GO:0045017
OE9A069039	67.2917	3.96184	0.371949	10.6515	1.71498e-26	8.69579e-24	OE9A069039	ID=OE9A069039T1;Parent=OE9A069039;Name=OE9A069039T1;product=OE9A069039P1;Description=wall-associated receptor kinase-like 8;Ontology_term=GO:0004672%2C GO:0005509%2C GO:0005515%2C GO:0005524%2C GO:0006468%2C GO:0016020
OE9A019518	2.36578	3.96075	1.88354	2.10283	0.035481	0.0933074	OE9A019518	ID=OE9A019518T1;Parent=OE9A019518;Name=OE9A019518T1;product=OE9A019518P1;Description=ribosomal subunit L2 (mitochondrion);Ontology_term=GO:0003735%2C GO:0006412%2C GO:0009507%2C GO:0015934%2C GO:0016740%2C GO:0019843%2C GO:0042254
OE9A082961	2.93063	3.96052	1.74192	2.27365	0.022987	0.0663503	OE9A082961	ID=OE9A082961T1;Parent=OE9A082961;Name=OE9A082961T1;product=OE9A082961P1;Description=uncharacterized protein LOC111369933;Ontology_term=GO:0016020
OE9A055681	2.03039	3.9574	1.80656	2.19058	0.0284825	0.0786451	OE9A055681	ID=OE9A055681T1;Parent=OE9A055681;Name=OE9A055681T1;product=OE9A055681P1;Description=NDR1 HIN1 1;Ontology_term=GO:0004871%2C GO:0006952%2C GO:0007165%2C GO:0009506%2C GO:0016021%2C GO:0046658
OE9A006598	6.8543	3.95619	0.932181	4.24402	2.19555e-05	0.000181273	OE9A006598	ID=OE9A006598T1;Parent=OE9A006598;Name=OE9A006598T1;product=OE9A006598P1;Description=ribosomal S11 (chloroplast);Ontology_term=GO:0003735%2C GO:0005840%2C GO:0006412%2C GO:0009507%2C GO:0019843%2C GO:0042254
OE9A044871	2.79488	3.95602	1.44183	2.74376	0.00607403	0.0224805	OE9A044871	ID=OE9A044871T1;Parent=OE9A044871;Name=OE9A044871T1;product=OE9A044871P1;Description=receptor kinase ANXUR1;Ontology_term=GO:0004674%2C GO:0005524%2C GO:0006468%2C GO:0009069%2C GO:0016021
OE9A006447	1.36627	3.95449	1.8087	2.18637	0.0287883	0.0793318	OE9A006447	ID=OE9A006447T1;Parent=OE9A006447;Name=OE9A006447T1;product=OE9A006447P1;Description=nucleobase-ascorbate transporter 6;Ontology_term=GO:0005215%2C GO:0016021%2C GO:0055085
OE9A077755	112.105	3.95334	0.506402	7.80672	5.86953e-15	4.19455e-13	OE9A077755	ID=OE9A077755T1;Parent=OE9A077755;Name=OE9A077755T1;product=OE9A077755P1;Description=calcium-binding PBP1-like;Ontology_term=GO:0005509
OE9A100467	122.405	3.95156	0.529481	7.46308	8.45233e-14	4.83008e-12	OE9A100467	ID=OE9A100467T1;Parent=OE9A100467;Name=OE9A100467T1;product=OE9A100467P1;Description=wall-associated receptor kinase-like 8;Ontology_term=GO:0004672%2C GO:0005509%2C GO:0005515%2C GO:0005524%2C GO:0006468%2C GO:0030247
OE9A070723	12.3209	3.95043	0.682508	5.7881	7.11865e-09	1.39508e-07	OE9A070723	ID=OE9A070723T1;Parent=OE9A070723;Name=OE9A070723T1;product=OE9A070723P1;Description=homeobox-leucine zipper HDG11;Ontology_term=GO:0005634%2C GO:0006355%2C GO:0008289%2C GO:0043565
OE9A074364	7.6054	3.95038	0.847739	4.6599	3.16361e-06	3.24738e-05	OE9A074364	ID=OE9A074364T1;Parent=OE9A074364;Name=OE9A074364T1;product=OE9A074364P1
OE9A002669	11.7765	3.9502	0.872169	4.52916	5.92178e-06	5.68064e-05	OE9A002669	ID=OE9A002669T1;Parent=OE9A002669;Name=OE9A002669T1;product=OE9A002669P1;Description=homeobox-leucine zipper HDG11-like;Ontology_term=GO:0006355%2C GO:0008289%2C GO:0043565
OE9A022647	6.60977	3.94697	0.933221	4.2294	2.34313e-05	0.000191871	OE9A022647	ID=OE9A022647T1;Parent=OE9A022647;Name=OE9A022647T1;product=OE9A022647P1;Description=auxin response factor 9;Ontology_term=GO:0003677%2C GO:0005634%2C GO:0006355%2C GO:0009734
OE9A055166	1.84814	3.94668	1.745	2.2617	0.0237158	0.0680333	OE9A055166	ID=OE9A055166T1;Parent=OE9A055166;Name=OE9A055166T1;product=OE9A055166P1
OE9A031165	3.28891	3.94643	1.27533	3.09445	0.00197181	0.0088156	OE9A031165	ID=OE9A031165T1;Parent=OE9A031165;Name=OE9A031165T1;product=OE9A031165P1;Description=transcription factor gamyb;Ontology_term=GO:0003677
OE9A106306	4.47668	3.94563	1.36689	2.88657	0.00389468	0.0155826	OE9A106306	ID=OE9A106306T1;Parent=OE9A106306;Name=OE9A106306T1;product=OE9A106306P1;Description=DETOXIFICATION 16;Ontology_term=GO:0006855%2C GO:0015238%2C GO:0015297%2C GO:0016021
OE9A010126	4.47829	3.94412	1.25107	3.15259	0.00161828	0.00745844	OE9A010126	ID=OE9A010126T1;Parent=OE9A010126;Name=OE9A010126T1;product=OE9A010126P1;Description=NRT1 PTR FAMILY -like;Ontology_term=GO:0005215%2C GO:0006857%2C GO:0016021
OE9A088728	3.5322	3.94389	1.5586	2.5304	0.0113931	0.0376751	OE9A088728	ID=OE9A088728T1;Parent=OE9A088728;Name=OE9A088728T1;product=OE9A088728P1
OE9pt000029	1448.59	3.94075	0.380188	10.3653	3.56717e-25	1.34058e-22	OE9pt000029	ID=OE9pt000029T1;Parent=OE9pt000029;product=OE9pt000029P1;Description=rbcL
OE9A040577	3.49294	3.93872	1.57232	2.50504	0.0122438	0.0399791	OE9A040577	ID=OE9A040577T1;Parent=OE9A040577;Name=OE9A040577T1;product=OE9A040577P1
OE9A059944	6.19842	3.93836	1.22693	3.20993	0.00132766	0.00632806	OE9A059944	ID=OE9A059944T1;Parent=OE9A059944;Name=OE9A059944T1;product=OE9A059944P1;Description=terpene synthase 10-like;Ontology_term=GO:0000287%2C GO:0010333%2C GO:0016114
OE9A023640	79.5296	3.93618	0.639058	6.15936	7.30418e-10	1.79205e-08	OE9A023640	ID=OE9A023640T1;Parent=OE9A023640;Name=OE9A023640T1;product=OE9A023640P1;Description=premnaspirodiene oxygenase-like;Ontology_term=GO:0004497%2C GO:0005506%2C GO:0016021%2C GO:0016705%2C GO:0020037%2C GO:0055114
OE9A076093	47.1201	3.9361	1.39125	2.82917	0.00466688	0.0181383	OE9A076093	ID=OE9A076093T1;Parent=OE9A076093;Name=OE9A076093T1;product=OE9A076093P1;Description=E3 ubiquitin- ligase PUB23-like;Ontology_term=GO:0004842%2C GO:0005488%2C GO:0016567
OE9A033716	1.19157	3.93554	1.8479	2.12974	0.0331934	0.0885897	OE9A033716	ID=OE9A033716T1;Parent=OE9A033716;Name=OE9A033716T1;product=OE9A033716P1;Description=hypothetical protein CDL12_13501;Ontology_term=GO:0008253%2C GO:0009264%2C GO:0016311
OE9A117971	1.98162	3.92568	1.7419	2.25368	0.0242165	0.0691244	OE9A117971	ID=OE9A117971T1;Parent=OE9A117971;Name=OE9A117971T1;product=OE9A117971P1;md5=8b240e1a0064b805680ca50de83c439c;INTERPRO=<table><tr><th>DB</th><th>ID</th><th>Description</th></tr><tr><td>PANTHER</td><td>PTHR33648</td><td></td></tr><tr><td>PANTHER</td><td>PTHR33648:SF1</td><td></td></tr><tr><td>Pfam</td><td>PF01476</td><td>LysM domain</td></tr></table>;Description=Protein COBRA
OE9A037164	3.85515	3.92519	1.18133	3.32269	0.000891532	0.00450904	OE9A037164	ID=OE9A037164T1;Parent=OE9A037164;Name=OE9A037164T1;product=OE9A037164P1
OE9A052507	368.356	3.92387	0.369633	10.6156	2.52186e-26	1.20236e-23	OE9A052507	ID=OE9A052507T1;Parent=OE9A052507;Name=OE9A052507T1;product=OE9A052507P1
OE9A036713	132.795	3.92385	0.84633	4.63632	3.54672e-06	3.60014e-05	OE9A036713	ID=OE9A036713T1;Parent=OE9A036713;Name=OE9A036713T1;product=OE9A036713P1;Description=cytochrome P450 71A6-like;Ontology_term=GO:0005506%2C GO:0016705%2C GO:0020037%2C GO:0055114
OE9pt000036	44.2223	3.9236	0.539672	7.27033	3.58598e-13	1.77598e-11	OE9pt000036	ID=OE9pt000036T1;Parent=OE9pt000036;product=OE9pt000036P1;Description=psbL
OE9A113459	12.5987	3.92325	0.937313	4.18563	2.84376e-05	0.000227444	OE9A113459	ID=OE9A113459T1;Parent=OE9A113459;Name=OE9A113459T1;product=OE9A113459P1;Description=probable LRR receptor-like serine threonine- kinase At1g07650 isoform X2;Ontology_term=GO:0004672%2C GO:0005524%2C GO:0006468%2C GO:0016021
OE9A031175	29.3819	3.92188	0.723685	5.41932	5.98255e-08	9.63725e-07	OE9A031175	ID=OE9A031175T1;Parent=OE9A031175;Name=OE9A031175T1;product=OE9A031175P1;Description=probable WRKY transcription factor 31;Ontology_term=GO:0003700%2C GO:0005667%2C GO:0006355%2C GO:0043565%2C GO:0045449
OE9A116286	3.09309	3.92018	1.50974	2.5966	0.00941525	0.0321497	OE9A116286	ID=OE9A116286T1;Parent=OE9A116286;Name=OE9A116286T1;product=OE9A116286P1
OE9A082606	1.82921	3.91698	1.70677	2.29496	0.0217355	0.0635008	OE9A082606	ID=OE9A082606T1;Parent=OE9A082606;Name=OE9A082606T1;product=OE9A082606P1;Description=BTR1-like isoform X2;Ontology_term=GO:0003723
OE9A029441	1.3012	3.91692	1.64428	2.38215	0.0172118	0.0526439	OE9A029441	ID=OE9A029441T1;Parent=OE9A029441;Name=OE9A029441T1;product=OE9A029441P1;Description=GDSL esterase lipase At5g03820-like;Ontology_term=GO:0016788
OE9A055720	2.17887	3.91629	1.39159	2.81426	0.00488898	0.0188297	OE9A055720	ID=OE9A055720T1;Parent=OE9A055720;Name=OE9A055720T1;product=OE9A055720P1;Description=exocyst complex component EXO70A1-like;Ontology_term=GO:0000145%2C GO:0006887
OE9A110821	2.77157	3.91516	1.47733	2.65017	0.00804525	0.0283099	OE9A110821	ID=OE9A110821T1;Parent=OE9A110821;Name=OE9A110821T1;product=OE9A110821P1
OE9A042644	3.46729	3.91469	1.26855	3.08595	0.00202901	0.00902585	OE9A042644	ID=OE9A042644T1;Parent=OE9A042644;Name=OE9A042644T1;product=OE9A042644P1
OE9A079861	2.1127	3.91101	1.57441	2.48411	0.0129875	0.0419573	OE9A079861	ID=OE9A079861T1;Parent=OE9A079861;Name=OE9A079861T1;product=OE9A079861P1;Description=probable inactive receptor kinase RLK902;Ontology_term=GO:0004672%2C GO:0005524%2C GO:0006468
OE9A082198	1.72388	3.91013	1.72203	2.27065	0.0231679	0.0667877	OE9A082198	ID=OE9A082198T1;Parent=OE9A082198;Name=OE9A082198T1;product=OE9A082198P1;Description=DETOXIFICATION 24-like;Ontology_term=GO:0006855%2C GO:0015238%2C GO:0015297%2C GO:0016021
OE9A077702	40.8179	3.90948	0.665084	5.87818	4.14803e-09	8.52668e-08	OE9A077702	ID=OE9A077702T1;Parent=OE9A077702;Name=OE9A077702T1;product=OE9A077702P1;Description=12-oxophytodienoate reductase 11;Ontology_term=GO:0010181%2C GO:0016491%2C GO:0055114
OE9A117570	4.24118	3.90541	1.16648	3.34804	0.000813863	0.00416969	OE9A117570	ID=OE9A117570T1;Parent=OE9A117570;Name=OE9A117570T1;product=OE9A117570P1;Description=methanol O-anthraniloyltransferase;Ontology_term=GO:0016020%2C GO:0016747
OE9A066085	2.69843	3.90528	1.53632	2.54197	0.011023	0.0367057	OE9A066085	ID=OE9A066085T1;Parent=OE9A066085;Name=OE9A066085T1;product=OE9A066085P1;Description=autophagy-related 18a;Ontology_term=GO:0000422%2C GO:0005515%2C GO:0005829%2C GO:0006497%2C GO:0019898%2C GO:0032266%2C GO:0034045%2C GO:0034497%2C GO:0044804%2C GO:0080025
OE9A023122	1.82181	3.90464	1.77482	2.20003	0.0278051	0.0771882	OE9A023122	ID=OE9A023122T1;Parent=OE9A023122;Name=OE9A023122T1;product=OE9A023122P1;Description=GATA transcription factor 18-like;Ontology_term=GO:0003700%2C GO:0005667%2C GO:0006355%2C GO:0008270%2C GO:0043565%2C GO:0045449
OE9A044745	1.82868	3.9044	1.71203	2.28057	0.022574	0.0654358	OE9A044745	ID=OE9A044745T1;Parent=OE9A044745;Name=OE9A044745T1;product=OE9A044745P1;Description=homeobox knotted-1-like 3 isoform X2;Ontology_term=GO:0003677%2C GO:0005634%2C GO:0006355
OE9A011082	3.00671	3.90403	1.31543	2.96787	0.00299872	0.0125315	OE9A011082	ID=OE9A011082T1;Parent=OE9A011082;Name=OE9A011082T1;product=OE9A011082P1;Description=ETHYLENE INSENSITIVE 3-like 4;Ontology_term=GO:0003700%2C GO:0005634%2C GO:0005667%2C GO:0045449
OE9A109731	1.35211	3.90297	1.38753	2.8129	0.00490975	0.0188824	OE9A109731	ID=OE9A109731T1;Parent=OE9A109731;Name=OE9A109731T1;product=OE9A109731P1;Description=nuclear pore complex NUP43;Ontology_term=GO:0005515%2C GO:0009507%2C GO:0031080
OE9A119755	3.20601	3.90165	1.16414	3.35154	0.000803643	0.00412594	OE9A119755	ID=OE9A119755T1;Parent=OE9A119755;Name=OE9A119755T1;product=OE9A119755P1;Description=phosphatidate cytidylyltransferase 1;Ontology_term=GO:0004605%2C GO:0005789%2C GO:0006655%2C GO:0016021%2C GO:0016024
OE9A014035	3.34395	3.89985	1.24937	3.12146	0.00179956	0.00817827	OE9A014035	ID=OE9A014035T1;Parent=OE9A014035;Name=OE9A014035T1;product=OE9A014035P1
OE9A019700	671732	3.89928	0.51061	7.6365	2.23203e-14	1.42886e-12	OE9A019700	ID=OE9A019700T1;Parent=OE9A019700;Name=OE9A019700T1;product=OE9A019700P1
OE9A074349	1.72019	3.89742	1.66016	2.34762	0.0188939	0.056751	OE9A074349	ID=OE9A074349T1;Parent=OE9A074349;Name=OE9A074349T1;product=OE9A074349P1;Description=BEL1-like homeodomain 11;Ontology_term=GO:0006355%2C GO:0043565
OE9A096898	3.74753	3.89335	1.77913	2.18835	0.0286442	0.0790096	OE9A096898	ID=OE9A096898T1;Parent=OE9A096898;Name=OE9A096898T1;product=OE9A096898P1;Description=probable glutathione S-transferase;Ontology_term=GO:0005515
OE9A107581	493616	3.88817	0.505778	7.68751	1.50026e-14	1.00893e-12	OE9A107581	ID=OE9A107581T1;Parent=OE9A107581;Name=OE9A107581T1;product=OE9A107581P1
OE9A069138	3.06573	3.8876	1.59591	2.43597	0.0148517	0.046709	OE9A069138	ID=OE9A069138T1;Parent=OE9A069138;Name=OE9A069138T1;product=OE9A069138P1;Description=abscisic acid 8 -hydroxylase 4-like;Ontology_term=GO:0005506%2C GO:0007275%2C GO:0010268%2C GO:0010295%2C GO:0016021%2C GO:0016125%2C GO:0016132%2C GO:0020037%2C GO:0055114
OE9A074222	432073	3.88538	0.509175	7.63074	2.33409e-14	1.48231e-12	OE9A074222	ID=OE9A074222T1;Parent=OE9A074222;Name=OE9A074222T1;product=OE9A074222P1
OE9A021975	3.43375	3.87784	1.62153	2.39147	0.0167813	0.0515514	OE9A021975	ID=OE9A021975T1;Parent=OE9A021975;Name=OE9A021975T1;product=OE9A021975P1;Description=probable aquaporin TIP3-2;Ontology_term=GO:0005887%2C GO:0006833%2C GO:0009705%2C GO:0009992%2C GO:0015250%2C GO:0015254%2C GO:0015793%2C GO:0034220%2C GO:0042807
OE9A013792	2.34547	3.87739	1.52905	2.53581	0.0112187	0.0372138	OE9A013792	ID=OE9A013792T1;Parent=OE9A013792;Name=OE9A013792T1;product=OE9A013792P1
OE9mt000016	31.3624	3.87193	0.655915	5.90309	3.56746e-09	7.42404e-08	OE9mt000016	ID=OE9mt000016T1;Parent=OE9mt000016;product=OE9mt000016P1;Description=nad4L;Name=OE9mt000016T1
OE9A015772	1.77377	3.86743	1.58586	2.4387	0.0147402	0.0464224	OE9A015772	ID=OE9A015772T1;Parent=OE9A015772;Name=OE9A015772T1;product=OE9A015772P1;Description=basic blue -like;Ontology_term=GO:0006118%2C GO:0009055%2C GO:0046658
OE9A087838	27.6314	3.86645	0.568786	6.79771	1.06293e-11	3.9666e-10	OE9A087838	ID=OE9A087838T1;Parent=OE9A087838;Name=OE9A087838T1;product=OE9A087838P1
OE9A075686	51.0332	3.86565	1.17312	3.2952	0.000983526	0.00490479	OE9A075686	ID=OE9A075686T1;Parent=OE9A075686;Name=OE9A075686T1;product=OE9A075686P1;Description=E3 ubiquitin- ligase PUB23-like;Ontology_term=GO:0004842%2C GO:0005488%2C GO:0016567
OE9A042640	1.41365	3.86357	1.69724	2.27638	0.022823	0.0659845	OE9A042640	ID=OE9A042640T1;Parent=OE9A042640;Name=OE9A042640T1;product=OE9A042640P1;Description=ribosomal L2 (chloroplast);Ontology_term=GO:0003735%2C GO:0005739%2C GO:0006412%2C GO:0009507%2C GO:0015934%2C GO:0016740%2C GO:0019843%2C GO:0042254
OE9A000338	5.76224	3.86228	1.29399	2.98479	0.00283769	0.0119936	OE9A000338	ID=OE9A000338T1;Parent=OE9A000338;Name=OE9A000338T1;product=OE9A000338P1;Description=polyadenylate-binding 7;Ontology_term=GO:0000166%2C GO:0003723%2C GO:0005737
OE9A061763	3.06468	3.86026	1.76025	2.19302	0.0283059	0.0782724	OE9A061763	ID=OE9A061763T1;Parent=OE9A061763;Name=OE9A061763T1;product=OE9A061763P1;Description=lignin-forming anionic peroxidase;Ontology_term=GO:0004601%2C GO:0005576%2C GO:0006804%2C GO:0006979%2C GO:0020037%2C GO:0042744%2C GO:0046872%2C GO:0055114%2C GO:0098869
OE9A025665	4.68582	3.86005	1.22776	3.14397	0.0016667	0.00765178	OE9A025665	ID=OE9A025665T1;Parent=OE9A025665;Name=OE9A025665T1;product=OE9A025665P1
OE9A061329	19.344	3.85757	0.950378	4.05898	4.92866e-05	0.000366483	OE9A061329	ID=OE9A061329T1;Parent=OE9A061329;Name=OE9A061329T1;product=OE9A061329P1;Description=calmodulin-like isoform X1;Ontology_term=GO:0005509
OE9A115499	12.1494	3.85752	1.17437	3.28474	0.00102075	0.00506002	OE9A115499	ID=OE9A115499T1;Parent=OE9A115499;Name=OE9A115499T1;product=OE9A115499P1;Description=ethylene-responsive transcription factor 1B-like;Ontology_term=GO:0003677%2C GO:0003700%2C GO:0005667%2C GO:0006355%2C GO:0045449
OE9A100212	2.60608	3.85645	1.61975	2.38088	0.0172712	0.0527899	OE9A100212	ID=OE9A100212T1;Parent=OE9A100212;Name=OE9A100212T1;product=OE9A100212P1
OE9A071429	3.46402	3.85538	1.4452	2.66771	0.00763696	0.0271665	OE9A071429	ID=OE9A071429T1;Parent=OE9A071429;Name=OE9A071429T1;product=OE9A071429P1
OE9A031211	12.504	3.85464	0.825643	4.66865	3.03179e-06	3.13266e-05	OE9A031211	ID=OE9A031211T1;Parent=OE9A031211;Name=OE9A031211T1;product=OE9A031211P1;Description=G-type lectin S-receptor-like serine threonine- kinase At4g27290 isoform X2;Ontology_term=GO:0004674%2C GO:0005524%2C GO:0005886%2C GO:0006468%2C GO:0006952%2C GO:0009069%2C GO:0009506%2C GO:0016021%2C GO:0030246%2C GO:0048544
OE9A097175	1.84089	3.85409	1.46055	2.63879	0.00832024	0.0290758	OE9A097175	ID=OE9A097175T1;Parent=OE9A097175;Name=OE9A097175T1;product=OE9A097175P1;Description=flavonoid 3 -monooxygenase-like;Ontology_term=GO:0004497%2C GO:0005506%2C GO:0016705%2C GO:0020037%2C GO:0055114
OE9A113334	5.97598	3.85194	0.932774	4.12955	3.63471e-05	0.000281814	OE9A113334	ID=OE9A113334T1;Parent=OE9A113334;Name=OE9A113334T1;product=OE9A113334P1;Description=G-type lectin S-receptor-like serine threonine- kinase At4g27290 isoform X1;Ontology_term=GO:0004674%2C GO:0005524%2C GO:0006468%2C GO:0009069%2C GO:0016020
OE9A117747	9.96053	3.85177	0.730753	5.27095	1.35716e-07	1.99234e-06	OE9A117747	ID=OE9A117747T1;Parent=OE9A117747;Name=OE9A117747T1;product=OE9A117747P1;Description=probable methyltransferase PMT15;Ontology_term=GO:0008168%2C GO:0016021%2C GO:0032259
OE9A112098	1.22469	3.84267	1.5958	2.40799	0.0160405	0.0496942	OE9A112098	ID=OE9A112098T1;Parent=OE9A112098;Name=OE9A112098T1;product=OE9A112098P1;Description=kinesin KIN-14N;Ontology_term=GO:0003777%2C GO:0005524%2C GO:0005871%2C GO:0005874%2C GO:0007018%2C GO:0008017%2C GO:0016887%2C GO:0045298
OE9A045794	185.397	3.84256	0.496556	7.73844	1.00648e-14	6.88456e-13	OE9A045794	ID=OE9A045794T1;Parent=OE9A045794;Name=OE9A045794T1;product=OE9A045794P1
OE9A058733	28.9147	3.84216	0.590126	6.51075	7.4777e-11	2.262e-09	OE9A058733	ID=OE9A058733T1;Parent=OE9A058733;Name=OE9A058733T1;product=OE9A058733P1;Description=STRICTOSIDINE SYNTHASE-LIKE 6-like;Ontology_term=GO:0005783%2C GO:0016021%2C GO:0016114%2C GO:0016788%2C GO:0016844%2C GO:0042432
OE9A026964	33.6817	3.84094	0.52501	7.31594	2.5558e-13	1.30828e-11	OE9A026964	ID=OE9A026964T1;Parent=OE9A026964;Name=OE9A026964T1;product=OE9A026964P1;Description=lysine histidine transporter-like 8;Ontology_term=GO:0003333%2C GO:0015171%2C GO:0016021
OE9A023592	5.35424	3.83957	1.55082	2.47584	0.0132924	0.0427175	OE9A023592	ID=OE9A023592T1;Parent=OE9A023592;Name=OE9A023592T1;product=OE9A023592P1
OE9A120398	3.81643	3.83957	1.42658	2.69145	0.0071143	0.0256156	OE9A120398	ID=OE9A120398T1;Parent=OE9A120398;Name=OE9A120398T1;product=OE9A120398P1
OE9A010071	1.18953	3.83874	1.8081	2.12307	0.0337478	0.089732	OE9A010071	ID=OE9A010071T1;Parent=OE9A010071;Name=OE9A010071T1;product=OE9A010071P1;Description=lycopene beta-cyclase, partial;Ontology_term=GO:0016491%2C GO:0044710
OE9A030990	2.09134	3.8363	1.64564	2.3312	0.019743	0.058749	OE9A030990	ID=OE9A030990T1;Parent=OE9A030990;Name=OE9A030990T1;product=OE9A030990P1;Description=GTP-binding SAR1A;Ontology_term=GO:0005525%2C GO:0005783%2C GO:0005794%2C GO:0006886%2C GO:0016192
OE9A026751	3.85577	3.83501	1.39045	2.75811	0.00581375	0.0216931	OE9A026751	ID=OE9A026751T1;Parent=OE9A026751;Name=OE9A026751T1;product=OE9A026751P1
OE9A073775	14.7585	3.83435	0.643471	5.95885	2.54021e-09	5.47533e-08	OE9A073775	ID=OE9A073775T2;Parent=OE9A073775;Name=OE9A073775T2;product=OE9A073775P2;Description=uncharacterized protein LOC111396163;Ontology_term=GO:0016021
OE9A074071	8.20673	3.83402	1.21823	3.1472	0.00164841	0.00757733	OE9A074071	ID=OE9A074071T1;Parent=OE9A074071;Name=OE9A074071T1;product=OE9A074071P1;Description=peroxidase 10;Ontology_term=GO:0004601%2C GO:0005576%2C GO:0006804%2C GO:0006979%2C GO:0016021%2C GO:0020037%2C GO:0042744%2C GO:0046872%2C GO:0055114%2C GO:0098869
OE9A094934	5.13091	3.83346	1.24507	3.07891	0.00207756	0.00919701	OE9A094934	ID=OE9A094934T1;Parent=OE9A094934;Name=OE9A094934T1;product=OE9A094934P1;Description=NRT1 PTR FAMILY -like;Ontology_term=GO:0005215%2C GO:0006857%2C GO:0016021
OE9A029643	2.13433	3.8324	1.69096	2.2664	0.0234267	0.0673879	OE9A029643	ID=OE9A029643T1;Parent=OE9A029643;Name=OE9A029643T1;product=OE9A029643P1;Description=late blight resistance homolog R1A-3 isoform X1;Ontology_term=GO:0043531
OE9A067715	431.481	3.831	0.409196	9.36226	7.80514e-21	1.49298e-18	OE9A067715	ID=OE9A067715T1;Parent=OE9A067715;Name=OE9A067715T1;product=OE9A067715P1;Description=rust resistance kinase Lr10-like;Ontology_term=GO:0004672%2C GO:0005524%2C GO:0006468
OE9A016024	2.24799	3.82983	1.56696	2.44412	0.0145205	0.0458434	OE9A016024	ID=OE9A016024T1;Parent=OE9A016024;Name=OE9A016024T1;product=OE9A016024P1;Description=B3 domain-containing At5g60140-like;Ontology_term=GO:0003677
OE9A093035	2.95589	3.8297	1.50204	2.54966	0.0107828	0.0360753	OE9A093035	ID=OE9A093035T1;Parent=OE9A093035;Name=OE9A093035T1;product=OE9A093035P1;Description=autophagy-related 18a;Ontology_term=GO:0000422%2C GO:0005515%2C GO:0005829%2C GO:0006497%2C GO:0019898%2C GO:0032266%2C GO:0034045%2C GO:0034497%2C GO:0044804%2C GO:0080025
OE9A103189	8.17847	3.82967	0.767998	4.98657	6.14615e-07	7.55126e-06	OE9A103189	ID=OE9A103189T1;Parent=OE9A103189;Name=OE9A103189T1;product=OE9A103189P1;Description=nardilysin-like isoform X1;Ontology_term=GO:0003824%2C GO:0046872
OE9A009123	6.06223	3.82961	1.07872	3.55016	0.000385001	0.00218174	OE9A009123	ID=OE9A009123T1;Parent=OE9A009123;Name=OE9A009123T1;product=OE9A009123P1;Description=WAT1-related At1g43650;Ontology_term=GO:0005886%2C GO:0016021%2C GO:0022857%2C GO:0055085
OE9A044866	10.625	3.82879	1.00326	3.81635	0.00013544	0.000888032	OE9A044866	ID=OE9A044866T1;Parent=OE9A044866;Name=OE9A044866T1;product=OE9A044866P1;Description=Serine threonine kinase;Ontology_term=GO:0030247
OE9A001035	1.30417	3.82722	1.67881	2.27972	0.0226245	0.0655526	OE9A001035	ID=OE9A001035T1;Parent=OE9A001035;Name=OE9A001035T1;product=OE9A001035P1
OE9A053257	5.25389	3.82659	1.22968	3.11185	0.00185917	0.00839306	OE9A053257	ID=OE9A053257T1;Parent=OE9A053257;Name=OE9A053257T1;product=OE9A053257P1;Description=germin 2-1;Ontology_term=GO:0005576%2C GO:0030145%2C GO:0045735
OE9A080734	480.188	3.8257	0.458095	8.35132	6.75024e-17	7.28479e-15	OE9A080734	ID=OE9A080734T1;Parent=OE9A080734;Name=OE9A080734T1;product=OE9A080734P1
OE9A014816	3.31599	3.82362	1.41987	2.69293	0.00708276	0.0255334	OE9A014816	ID=OE9A014816T1;Parent=OE9A014816;Name=OE9A014816T1;product=OE9A014816P1;Description=transcription factor bHLH48-like;Ontology_term=GO:0046983
OE9pt000038	90.8072	3.8219	0.580111	6.58822	4.45139e-11	1.41459e-09	OE9pt000038	ID=OE9pt000038T1;Parent=OE9pt000038;product=OE9pt000038P1;Description=psbE
OE9A088893	7.26333	3.82172	0.907778	4.20998	2.55396e-05	0.000206646	OE9A088893	ID=OE9A088893T1;Parent=OE9A088893;Name=OE9A088893T1;product=OE9A088893P1;md5=d41bbcd134702adeadd50df1b0701e20;INTERPRO=<table><tr><th>DB</th><th>ID</th><th>Description</th></tr><tr><td>Coils</td><td>Coil</td><td></td></tr><tr><td>Gene3D</td><td>G3DSA:1.10.418.10</td><td></td></tr><tr><td>Gene3D</td><td>G3DSA:3.40.850.10</td><td></td></tr><tr><td>PANTHER</td><td>PTHR24115</td><td></td></tr><tr><td…
OE9A066721	1.343	3.81608	1.80319	2.11629	0.0343198	0.0909822	OE9A066721	ID=OE9A066721T1;Parent=OE9A066721;Name=OE9A066721T1;product=OE9A066721P1;Description=heavy metal-associated isoprenylated plant 8-like;Ontology_term=GO:0005737%2C GO:0030001%2C GO:0046914%2C GO:0046916
OE9A045820	13.882	3.81563	0.796684	4.78939	1.67285e-06	1.84522e-05	OE9A045820	ID=OE9A045820T1;Parent=OE9A045820;Name=OE9A045820T1;product=OE9A045820P1;Description=G-type lectin S-receptor-like serine threonine- kinase RLK1;Ontology_term=GO:0004672%2C GO:0005524%2C GO:0006468
OE9A056186	1.78315	3.815	1.79506	2.12528	0.0335635	0.0893748	OE9A056186	ID=OE9A056186T1;Parent=OE9A056186;Name=OE9A056186T1;product=OE9A056186P1;Description=probable disease resistance At5g66900;Ontology_term=GO:0043531
OE9A097179	8.44294	3.81276	0.880507	4.33019	1.48979e-05	0.000128796	OE9A097179	ID=OE9A097179T1;Parent=OE9A097179;Name=OE9A097179T1;product=OE9A097179P1;Description=transcription factor MYB12-like;Ontology_term=GO:0003677
OE9A116822	9.27788	3.80215	0.961466	3.95453	7.66844e-05	0.000540752	OE9A116822	ID=OE9A116822T1;Parent=OE9A116822;Name=OE9A116822T1;product=OE9A116822P1;Description=E3 ubiquitin- ligase PUB24-like;Ontology_term=GO:0004842%2C GO:0005488%2C GO:0016567
OE9A064210	1.65483	3.80172	1.57342	2.41621	0.0156831	0.0488272	OE9A064210	ID=OE9A064210T1;Parent=OE9A064210;Name=OE9A064210T1;product=OE9A064210P1
OE9A020536	4.68018	3.80008	1.17087	3.24551	0.00117239	0.0057003	OE9A020536	ID=OE9A020536T1;Parent=OE9A020536;Name=OE9A020536T1;product=OE9A020536P1;Description=transcription factor bHLH35;Ontology_term=GO:0046983
OE9A098090	3.20267	3.79981	1.3888	2.73605	0.00621818	0.0229157	OE9A098090	ID=OE9A098090T1;Parent=OE9A098090;Name=OE9A098090T1;product=OE9A098090P1;Description=COMPASS-like H3K4 histone methylase component WDR5A;Ontology_term=GO:0005515
OE9A081578	1.5774	3.79973	1.73553	2.18937	0.02857	0.0788662	OE9A081578	ID=OE9A081578T1;Parent=OE9A081578;Name=OE9A081578T1;product=OE9A081578P1;Description=mitochondrial import inner membrane translocase subunit TIM22-4;Ontology_term=GO:0008566%2C GO:0015266%2C GO:0016021%2C GO:0033365%2C GO:0071806
OE9A063783	7.30216	3.79763	0.756764	5.01824	5.21463e-07	6.51451e-06	OE9A063783	ID=OE9A063783T1;Parent=OE9A063783;Name=OE9A063783T1;product=OE9A063783P1
OE9A103393	252.555	3.79644	0.334757	11.3409	8.23032e-30	7.46053e-27	OE9A103393	ID=OE9A103393T1;Parent=OE9A103393;Name=OE9A103393T1;product=OE9A103393P1;Description=rust resistance kinase Lr10-like;Ontology_term=GO:0004672%2C GO:0005524%2C GO:0006468
OE9A032787	22.5995	3.79627	0.665118	5.70767	1.14535e-08	2.16107e-07	OE9A032787	ID=OE9A032787T1;Parent=OE9A032787;Name=OE9A032787T1;product=OE9A032787P1;Description=ethylene-responsive transcription factor ABR1-like;Ontology_term=GO:0003677%2C GO:0003700%2C GO:0005667%2C GO:0006355%2C GO:0045449
OE9A016026	3.60704	3.79161	1.64269	2.30817	0.0209897	0.061734	OE9A016026	ID=OE9A016026T1;Parent=OE9A016026;Name=OE9A016026T1;product=OE9A016026P1;Description=serine carboxypeptidase-like 18;Ontology_term=GO:0004185%2C GO:0006508
OE9A000642	4.33905	3.79112	1.22859	3.08576	0.00203032	0.00903045	OE9A000642	ID=OE9A000642T1;Parent=OE9A000642;Name=OE9A000642T1;product=OE9A000642P1
OE9A027105	105.968	3.78779	0.49212	7.69688	1.39426e-14	9.41615e-13	OE9A027105	ID=OE9A027105T1;Parent=OE9A027105;Name=OE9A027105T1;product=OE9A027105P1;Description=ankyrin repeat-containing At3g12360-like;Ontology_term=GO:0005515
OE9A013831	4.75916	3.78554	1.33186	2.84228	0.00447916	0.0175131	OE9A013831	ID=OE9A013831T1;Parent=OE9A013831;Name=OE9A013831T1;product=OE9A013831P1;Description=uncharacterized protein LOC111374471;Ontology_term=GO:0003824
OE9A015021	2.27639	3.78111	1.66956	2.26473	0.0235295	0.0676347	OE9A015021	ID=OE9A015021T1;Parent=OE9A015021;Name=OE9A015021T1;product=OE9A015021P1;Description=flavonoid 3 -monooxygenase-like;Ontology_term=GO:0004497%2C GO:0005506%2C GO:0016705%2C GO:0020037%2C GO:0055114
OE9A012495	3.32418	3.78085	1.30319	2.90123	0.00371706	0.0150054	OE9A012495	ID=OE9A012495T1;Parent=OE9A012495;Name=OE9A012495T1;product=OE9A012495P1
OE9A041661	14.2086	3.77844	0.796321	4.74487	2.0864e-06	2.24329e-05	OE9A041661	ID=OE9A041661T2;Parent=OE9A041661;Name=OE9A041661T2;product=OE9A041661P2;Description=G-type lectin S-receptor-like serine threonine- kinase CES101;Ontology_term=GO:0004672%2C GO:0005524%2C GO:0006468%2C GO:0016020
OE9A089186	11.2744	3.77748	1.06078	3.56104	0.000369385	0.00210445	OE9A089186	ID=OE9A089186T1;Parent=OE9A089186;Name=OE9A089186T1;product=OE9A089186P1
OE9A015658	56.8486	3.77456	0.563811	6.69473	2.16068e-11	7.30378e-10	OE9A015658	ID=OE9A015658T1;Parent=OE9A015658;Name=OE9A015658T1;product=OE9A015658P1;Description=NADH dehydrogenase subunit 9 (mitochondrion);Ontology_term=GO:0005739%2C GO:0006120%2C GO:0006744%2C GO:0006814%2C GO:0008137%2C GO:0015992
OE9A015004	5.27107	3.77213	1.03988	3.62748	0.000286204	0.00169149	OE9A015004	ID=OE9A015004T1;Parent=OE9A015004;Name=OE9A015004T1;product=OE9A015004P1
OE9A111005	1.73109	3.77041	1.23334	3.05708	0.00223502	0.00979793	OE9A111005	ID=OE9A111005T1;Parent=OE9A111005;Name=OE9A111005T1;product=OE9A111005P1;Description=probable pectinesterase pectinesterase inhibitor 36;Ontology_term=GO:0004857%2C GO:0005618%2C GO:0005982%2C GO:0005985%2C GO:0016020%2C GO:0030599%2C GO:0042545%2C GO:0043086%2C GO:0045330%2C GO:0045490
OE9A039606	11.6731	3.76955	0.721292	5.2261	1.7312e-07	2.46221e-06	OE9A039606	ID=OE9A039606T1;Parent=OE9A039606;Name=OE9A039606T1;product=OE9A039606P1;Description=helicase magatama 3;Ontology_term=GO:0005524
OE9A104665	3.03135	3.76365	1.28799	2.9221	0.0034768	0.0142133	OE9A104665	ID=OE9A104665T1;Parent=OE9A104665;Name=OE9A104665T1;product=OE9A104665P1;Description=agamous-like MADS-box AGL18;Ontology_term=GO:0003677%2C GO:0003700%2C GO:0005634%2C GO:0005667%2C GO:0006355%2C GO:0045449%2C GO:0046983
OE9A066528	1.93308	3.76088	1.78143	2.11116	0.0347582	0.0918831	OE9A066528	ID=OE9A066528T1;Parent=OE9A066528;Name=OE9A066528T1;product=OE9A066528P1
OE9A073041	1.97414	3.75932	1.5072	2.49425	0.0126225	0.0409852	OE9A073041	ID=OE9A073041T1;Parent=OE9A073041;Name=OE9A073041T1;product=OE9A073041P1;Description=agamous-like MADS-box AGL81;Ontology_term=GO:0003677%2C GO:0046983
OE9A050899	29.6196	3.75835	0.53506	7.02418	2.15333e-12	9.17457e-11	OE9A050899	ID=OE9A050899T2;Parent=OE9A050899;Name=OE9A050899T2;product=OE9A050899P2;Description=G-type lectin S-receptor-like serine threonine- kinase At4g27290 isoform X1;Ontology_term=GO:0004674%2C GO:0005524%2C GO:0006468%2C GO:0009069%2C GO:0016020%2C GO:0048544
OE9mt000041	55.0374	3.75723	0.570629	6.58436	4.56845e-11	1.44751e-09	OE9mt000041	ID=OE9mt000041T1;Parent=OE9mt000041;product=OE9mt000041P1;Description=nad9;Name=OE9mt000041T1
OE9A009021	2.6762	3.7552	1.76693	2.12527	0.0335637	0.0893748	OE9A009021	ID=OE9A009021T1;Parent=OE9A009021;Name=OE9A009021T1;product=OE9A009021P1;Description=regulator of nonsense transcripts UPF2;Ontology_term=GO:0005488
OE9A011584	3.50631	3.74951	1.68363	2.22704	0.0259446	0.0730777	OE9A011584	ID=OE9A011584T1;Parent=OE9A011584;Name=OE9A011584T1;product=OE9A011584P1;Description=polygalacturonase-like;Ontology_term=GO:0004650%2C GO:0005982%2C GO:0005985
OE9A037143	3.44782	3.74897	1.29973	2.88442	0.00392138	0.0156718	OE9A037143	ID=OE9A037143T1;Parent=OE9A037143;Name=OE9A037143T1;product=OE9A037143P1;Description=TATA-box-binding isoform X2;Ontology_term=GO:0003677%2C GO:0006352%2C GO:0032440%2C GO:0055114
OE9A044563	3.19188	3.74888	1.40824	2.66211	0.00776534	0.0275025	OE9A044563	ID=OE9A044563T1;Parent=OE9A044563;Name=OE9A044563T1;product=OE9A044563P1;Description=NRT1 PTR FAMILY -like;Ontology_term=GO:0005215%2C GO:0006857%2C GO:0016021
OE9A114574	6.22252	3.74691	1.14397	3.27537	0.00105525	0.00521165	OE9A114574	ID=OE9A114574T2;Parent=OE9A114574;Name=OE9A114574T2;product=OE9A114574P2;Description=stachyose synthase;Ontology_term=GO:0003824
OE9A065201	1.53585	3.74254	1.67329	2.23664	0.0253098	0.0715927	OE9A065201	ID=OE9A065201T1;Parent=OE9A065201;Name=OE9A065201T1;product=OE9A065201P1
OE9pt000016	651.111	3.74229	0.278386	13.4428	3.3932e-41	1.80654e-37	OE9pt000016	ID=OE9pt000016T1;Parent=OE9pt000016;product=OE9pt000016P1;Description=psbD
OE9A121838	1.5363	3.74222	1.59539	2.34564	0.0189942	0.0569505	OE9A121838	ID=OE9A121838T1;Parent=OE9A121838;Name=OE9A121838T1;product=OE9A121838P1;Description=ankyrin repeat-containing ITN1-like isoform X1;Ontology_term=GO:0005515%2C GO:0016020
OE9A078305	68.7791	3.74206	0.529623	7.06552	1.60018e-12	6.98307e-11	OE9A078305	ID=OE9A078305T1;Parent=OE9A078305;Name=OE9A078305T1;product=OE9A078305P1;Description=probable LRR receptor-like serine threonine- kinase At1g74360;Ontology_term=GO:0004674%2C GO:0005515%2C GO:0005524%2C GO:0006468%2C GO:0009069%2C GO:0016021
OE9A030677	4.30884	3.7409	1.11637	3.35095	0.000805343	0.00413181	OE9A030677	ID=OE9A030677T1;Parent=OE9A030677;Name=OE9A030677T1;product=OE9A030677P1
OE9A003034	7.88115	3.74029	0.8673	4.31257	1.61371e-05	0.000138347	OE9A003034	ID=OE9A003034T1;Parent=OE9A003034;Name=OE9A003034T1;product=OE9A003034P1;Description=lactoylglutathione lyase;Ontology_term=GO:0004462%2C GO:0005975%2C GO:0006090%2C GO:0046872
OE9A083720	3.54791	3.73612	1.47976	2.52482	0.0115758	0.0381804	OE9A083720	ID=OE9A083720T1;Parent=OE9A083720;Name=OE9A083720T1;product=OE9A083720P1;Description=chloroplast processing peptidase-like isoform X1;Ontology_term=GO:0004252%2C GO:0006465%2C GO:0006627%2C GO:0009535%2C GO:0010027%2C GO:0016021%2C GO:0033108%2C GO:0042720
OE9A063707	3.52184	3.73284	0.962589	3.87792	0.000105353	0.000714369	OE9A063707	ID=OE9A063707T1;Parent=OE9A063707;Name=OE9A063707T1;product=OE9A063707P1;Description=glycosyltransferase family 92 RCOM_0530710-like;Ontology_term=GO:0016020
OE9A116581	1.15302	3.72995	1.65743	2.25044	0.0244208	0.0695354	OE9A116581	ID=OE9A116581T1;Parent=OE9A116581;Name=OE9A116581T1;product=OE9A116581P1
OE9A045382	2.14555	3.72839	1.33907	2.78431	0.0053641	0.0203071	OE9A045382	ID=OE9A045382T1;Parent=OE9A045382;Name=OE9A045382T1;product=OE9A045382P1;Description=disease resistance CSA1;Ontology_term=GO:0005515%2C GO:0007165
OE9A104578	2.47657	3.72787	1.20932	3.08261	0.00205196	0.00911147	OE9A104578	ID=OE9A104578T1;Parent=OE9A104578;Name=OE9A104578T1;product=OE9A104578P1
OE9pt000074	36.5875	3.72547	0.539787	6.90174	5.13682e-12	2.03586e-10	OE9pt000074	ID=OE9pt000074T1;Parent=OE9pt000074;product=OE9pt000074P1;Description=ndhG
OE9A023947	2.22248	3.72336	1.46568	2.54036	0.011074	0.0368448	OE9A023947	ID=OE9A023947T1;Parent=OE9A023947;Name=OE9A023947T1;product=OE9A023947P1
OE9A021028	26.9184	3.72229	1.00393	3.70773	0.000209128	0.0012904	OE9A021028	ID=OE9A021028T1;Parent=OE9A021028;Name=OE9A021028T1;product=OE9A021028P1;Description=isoprene synthase, chloroplastic-like;Ontology_term=GO:0000287%2C GO:0008152%2C GO:0010333
OE9A065154	63.8222	3.72175	0.568327	6.5486	5.80774e-11	1.80294e-09	OE9A065154	ID=OE9A065154T1;Parent=OE9A065154;Name=OE9A065154T1;product=OE9A065154P1;Description=F-box kelch-repeat At1g23390;Ontology_term=GO:0005515
OE9A094026	5.81197	3.7214	1.0748	3.4624	0.00053538	0.00289328	OE9A094026	ID=OE9A094026T1;Parent=OE9A094026;Name=OE9A094026T1;product=OE9A094026P1;Description=thioredoxin H4-1-like;Ontology_term=GO:0000103%2C GO:0005829%2C GO:0005886%2C GO:0006118%2C GO:0006457%2C GO:0006662%2C GO:0015035%2C GO:0016671%2C GO:0034599%2C GO:0045454%2C GO:0055114
OE9A106720	9.11598	3.71861	0.820885	4.53	5.89826e-06	5.66659e-05	OE9A106720	ID=OE9A106720T1;Parent=OE9A106720;Name=OE9A106720T1;product=OE9A106720P1;Description=thioredoxin reductase NTRB-like;Ontology_term=GO:0004791%2C GO:0005737%2C GO:0006118%2C GO:0006206%2C GO:0019430%2C GO:0055114
OE9A097727	9.74812	3.71736	0.681362	5.45578	4.87573e-08	8.06162e-07	OE9A097727	ID=OE9A097727T1;Parent=OE9A097727;Name=OE9A097727T1;product=OE9A097727P1
OE9A113506	248.414	3.71645	0.56835	6.53902	6.19238e-11	1.90936e-09	OE9A113506	ID=OE9A113506T1;Parent=OE9A113506;Name=OE9A113506T1;product=OE9A113506P1
OE9A058283	4.38847	3.71562	1.13617	3.27032	0.00107427	0.00528925	OE9A058283	ID=OE9A058283T1;Parent=OE9A058283;Name=OE9A058283T1;product=OE9A058283P1
OE9A103856	1.48887	3.71379	1.69211	2.19477	0.0281802	0.0780059	OE9A103856	ID=OE9A103856T1;Parent=OE9A103856;Name=OE9A103856T1;product=OE9A103856P1;Description=ER lumen -retaining receptor;Ontology_term=GO:0005783%2C GO:0006621%2C GO:0016021%2C GO:0046923
OE9pt000021	1005.85	3.71278	0.338415	10.9711	5.26444e-28	3.62251e-25	OE9pt000021	ID=OE9pt000021T1;Parent=OE9pt000021;product=OE9pt000021P1;Description=psaA
OE9A023329	143.503	3.71182	0.473268	7.84297	4.40024e-15	3.24499e-13	OE9A023329	ID=OE9A023329T1;Parent=OE9A023329;Name=OE9A023329T1;product=OE9A023329P1;Description=high-affinity nitrate transporter -like;Ontology_term=GO:0010167%2C GO:0015706%2C GO:0016021
OE9A094060	6.98981	3.71179	1.15145	3.22359	0.00126595	0.00608112	OE9A094060	ID=OE9A094060T1;Parent=OE9A094060;Name=OE9A094060T1;product=OE9A094060P1
OE9A011583	198.493	3.71157	0.50081	7.41112	1.25233e-13	6.9005e-12	OE9A011583	ID=OE9A011583T1;Parent=OE9A011583;Name=OE9A011583T1;product=OE9A011583P1;Description=probable 1-deoxy-D-xylulose-5-phosphate synthase 2, chloroplastic;Ontology_term=GO:0006694%2C GO:0008661%2C GO:0016114
OE9A034312	4.9542	3.70748	1.17352	3.15927	0.00158163	0.00732333	OE9A034312	ID=OE9A034312T1;Parent=OE9A034312;Name=OE9A034312T1;product=OE9A034312P1
OE9A101653	41.3393	3.70728	0.86946	4.26389	2.00894e-05	0.000167468	OE9A101653	ID=OE9A101653T1;Parent=OE9A101653;Name=OE9A101653T1;product=OE9A101653P1;Description=RING-H2 finger ATL78-like;Ontology_term=GO:0005515%2C GO:0008270%2C GO:0016021
OE9A118737	2.29347	3.70568	1.69515	2.18604	0.0288124	0.0793717	OE9A118737	ID=OE9A118737T1;Parent=OE9A118737;Name=OE9A118737T1;product=OE9A118737P1
OE9A032751	1.69872	3.70513	1.62807	2.27578	0.0228593	0.066053	OE9A032751	ID=OE9A032751T1;Parent=OE9A032751;Name=OE9A032751T1;product=OE9A032751P1
OE9A110582	29.3082	3.70435	0.473903	7.81668	5.42361e-15	3.8933e-13	OE9A110582	ID=OE9A110582T1;Parent=OE9A110582;Name=OE9A110582T1;product=OE9A110582P1;Description=G-type lectin S-receptor-like serine threonine- kinase At4g27290 isoform X1;Ontology_term=GO:0004674%2C GO:0005524%2C GO:0006468%2C GO:0009069%2C GO:0048544
OE9A068312	1.42427	3.70323	1.76095	2.10297	0.0354684	0.0932819	OE9A068312	ID=OE9A068312T1;Parent=OE9A068312;Name=OE9A068312T1;product=OE9A068312P1
OE9A099806	1.61306	3.70219	1.38462	2.67379	0.00749986	0.0267892	OE9A099806	ID=OE9A099806T1;Parent=OE9A099806;Name=OE9A099806T1;product=OE9A099806P1;Description=serine-rich adhesin for platelets isoform X1;Ontology_term=GO:0005515
OE9A053768	1.2143	3.70196	1.70623	2.16968	0.0300313	0.0819404	OE9A053768	ID=OE9A053768T1;Parent=OE9A053768;Name=OE9A053768T1;product=OE9A053768P1;Description=cytoplasmic tRNA 2-thiolation 2;Ontology_term=GO:0000049%2C GO:0002098%2C GO:0005737%2C GO:0010311%2C GO:0016779%2C GO:0016783%2C GO:0032447%2C GO:0034227
OE9A092600	6.3192	3.6969	1.02324	3.61292	0.000302768	0.00177331	OE9A092600	ID=OE9A092600T1;Parent=OE9A092600;Name=OE9A092600T1;product=OE9A092600P1;Description=RING-H2 finger ATL46-like;Ontology_term=GO:0005515%2C GO:0008270%2C GO:0016020
OE9A054935	4.77029	3.69603	1.0034	3.68351	0.000230044	0.00140212	OE9A054935	ID=OE9A054935T1;Parent=OE9A054935;Name=OE9A054935T1;product=OE9A054935P1;Description=YTH domain-containing family 2 isoform X2;Ontology_term=GO:0003723
OE9A019778	2.39829	3.69559	1.49129	2.47812	0.0132078	0.042527	OE9A019778	ID=OE9A019778T1;Parent=OE9A019778;Name=OE9A019778T1;product=OE9A019778P1
OE9A004021	3.64797	3.69214	1.18976	3.10327	0.00191397	0.00860396	OE9A004021	ID=OE9A004021T1;Parent=OE9A004021;Name=OE9A004021T1;product=OE9A004021P1;Description=uncharacterized protein LOC111379210;Ontology_term=GO:0016021
OE9A005629	2.3587	3.69104	1.42067	2.59809	0.00937428	0.0320338	OE9A005629	ID=OE9A005629T1;Parent=OE9A005629;Name=OE9A005629T1;product=OE9A005629P1;Description=PAF1 homolog;Ontology_term=GO:0006368%2C GO:0016570%2C GO:0016593
OE9A100723	6.03591	3.68842	1.35552	2.72103	0.00650794	0.0237969	OE9A100723	ID=OE9A100723T1;Parent=OE9A100723;Name=OE9A100723T1;product=OE9A100723P1;Description=Leucine-rich repeat;Ontology_term=GO:0005515
OE9A054650	4.12498	3.68832	1.17243	3.14589	0.00165585	0.00760633	OE9A054650	ID=OE9A054650T1;Parent=OE9A054650;Name=OE9A054650T1;product=OE9A054650P1;Description=mavicyanin-like;Ontology_term=GO:0006118%2C GO:0009055%2C GO:0016020
OE9A020639	2.85234	3.68711	1.77898	2.0726	0.0382095	0.0987352	OE9A020639	ID=OE9A020639T1;Parent=OE9A020639;Name=OE9A020639T1;product=OE9A020639P1;Description=metalloendo ase 3-MMP-like;Ontology_term=GO:0004222%2C GO:0006508%2C GO:0008270%2C GO:0031012
OE9A036137	5.30499	3.68697	0.98746	3.73379	0.000188619	0.00118003	OE9A036137	ID=OE9A036137T1;Parent=OE9A036137;Name=OE9A036137T1;product=OE9A036137P1;Description=phragmoplast orienting kinesin 2;Ontology_term=GO:0003777%2C GO:0005524%2C GO:0005874%2C GO:0007018%2C GO:0008017%2C GO:0045298
OE9A113649	34.268	3.68019	0.520299	7.07322	1.51383e-12	6.6504e-11	OE9A113649	ID=OE9A113649T1;Parent=OE9A113649;Name=OE9A113649T1;product=OE9A113649P1
OE9A101654	55.065	3.67948	0.453867	8.10695	5.19079e-16	4.72406e-14	OE9A101654	ID=OE9A101654T1;Parent=OE9A101654;Name=OE9A101654T1;product=OE9A101654P1
OE9A062869	61781.8	3.6782	0.499936	7.35734	1.87615e-13	9.93891e-12	OE9A062869	ID=OE9A062869T1;Parent=OE9A062869;Name=OE9A062869T1;product=OE9A062869P1
OE9A087150	2.63076	3.67722	1.46375	2.5122	0.0119983	0.0393423	OE9A087150	ID=OE9A087150T1;Parent=OE9A087150;Name=OE9A087150T1;product=OE9A087150P1;Description=unnamed protein product;Ontology_term=GO:0016021
OE9A031332	1.93766	3.67484	1.72907	2.12532	0.0335598	0.0893748	OE9A031332	ID=OE9A031332T1;Parent=OE9A031332;Name=OE9A031332T1;product=OE9A031332P1;Description=cyclase-associated 1-like;Ontology_term=GO:0003779%2C GO:0005829%2C GO:0007010%2C GO:0009826
OE9pt000020	1184.05	3.67457	0.346408	10.6076	2.74586e-26	1.28991e-23	OE9pt000020	ID=OE9pt000020T1;Parent=OE9pt000020;product=OE9pt000020P1;Description=psaB
OE9A103738	10.0826	3.67418	0.98474	3.73112	0.000190634	0.00118984	OE9A103738	ID=OE9A103738T1;Parent=OE9A103738;Name=OE9A103738T1;product=OE9A103738P1;Description=transcription factor LHW-like;Ontology_term=GO:0016301%2C GO:0016310
OE9A078726	2.64661	3.67031	1.60612	2.2852	0.0223011	0.0648153	OE9A078726	ID=OE9A078726T1;Parent=OE9A078726;Name=OE9A078726T1;product=OE9A078726P1
OE9A110844	25.7158	3.67011	0.528352	6.94633	3.74909e-12	1.52756e-10	OE9A110844	ID=OE9A110844T1;Parent=OE9A110844;Name=OE9A110844T1;product=OE9A110844P1;Description=ribosomal S7 (mitochondrion);Ontology_term=GO:0003735%2C GO:0005739%2C GO:0006412%2C GO:0009507%2C GO:0015935%2C GO:0019843%2C GO:0042254
OE9A059738	227.875	3.66599	0.327762	11.1849	4.83333e-29	3.95887e-26	OE9A059738	ID=OE9A059738T1;Parent=OE9A059738;Name=OE9A059738T1;product=OE9A059738P1;md5=0702c0f7a25fedbe97fb7427f9e3d98c;INTERPRO=<table><tr><th>DB</th><th>ID</th><th>Description</th></tr><tr><td>Gene3D</td><td>G3DSA:3.50.50.60</td><td></td></tr><tr><td>PANTHER</td><td>PTHR23023</td><td></td></tr><tr><td>PANTHER</td><td>PTHR23023:SF114</td><td></td></tr><tr><td>PRINTS</td><td>PR00370</td><td>Flavin-containi…
OE9A066327	4.96978	3.66301	1.16983	3.13123	0.00174077	0.00794842	OE9A066327	ID=OE9A066327T1;Parent=OE9A066327;Name=OE9A066327T1;product=OE9A066327P1;Description=uncharacterized protein LOC111378343;Ontology_term=GO:0006629
OE9A041322	25.953	3.65948	0.710994	5.14699	2.64705e-07	3.59207e-06	OE9A041322	ID=OE9A041322T1;Parent=OE9A041322;Name=OE9A041322T1;product=OE9A041322P1
OE9A046069	2.48835	3.65798	1.44691	2.52814	0.011467	0.0378684	OE9A046069	ID=OE9A046069T1;Parent=OE9A046069;Name=OE9A046069T1;product=OE9A046069P1;md5=520514b06da50b63995e8a82e8609ff8;INTERPRO=<table><tr><th>DB</th><th>ID</th><th>Description</th></tr><tr><td>Gene3D</td><td>G3DSA:3.40.50.261</td><td></td></tr><tr><td>PANTHER</td><td>PTHR11117</td><td></td></tr><tr><td>PANTHER</td><td>PTHR11117:SF9</td><td></td></tr><tr><td>ProSitePatterns</td><td>PS00399</td><td>ATP-cit…
OE9A009091	233.363	3.65764	0.574997	6.36115	2.00248e-10	5.51563e-09	OE9A009091	ID=OE9A009091T1;Parent=OE9A009091;Name=OE9A009091T1;product=OE9A009091P1;Description=beta-amyrin 28-oxidase-like;Ontology_term=GO:0004497%2C GO:0005506%2C GO:0016021%2C GO:0016705%2C GO:0020037%2C GO:0055114
OE9A048743	14.8262	3.6568	0.618723	5.91024	3.41618e-09	7.14178e-08	OE9A048743	ID=OE9A048743T1;Parent=OE9A048743;Name=OE9A048743T1;product=OE9A048743P1;Description=Serine threonine kinase;Ontology_term=GO:0004674%2C GO:0005509%2C GO:0005515%2C GO:0005524%2C GO:0006468%2C GO:0009069%2C GO:0016021%2C GO:0030247
OE9A103989	2.43871	3.6552	1.30287	2.8055	0.00502379	0.0192445	OE9A103989	ID=OE9A103989T1;Parent=OE9A103989;Name=OE9A103989T1;product=OE9A103989P1;Description=flavonoid 3 -monooxygenase-like;Ontology_term=GO:0004497%2C GO:0005506%2C GO:0016705%2C GO:0020037%2C GO:0055114
OE9A035668	2.45372	3.6535	1.56283	2.33774	0.0194008	0.0579521	OE9A035668	ID=OE9A035668T1;Parent=OE9A035668;Name=OE9A035668T1;product=OE9A035668P1;Description=pectin acetylesterase 8;Ontology_term=GO:0016787
OE9A021638	1.48559	3.65335	1.65031	2.21374	0.0268468	0.0750673	OE9A021638	ID=OE9A021638T1;Parent=OE9A021638;Name=OE9A021638T1;product=OE9A021638P1
OE9A096707	662.058	3.65225	0.399359	9.1453	5.94665e-20	1.02129e-17	OE9A096707	ID=OE9A096707T1;Parent=OE9A096707;Name=OE9A096707T1;product=OE9A096707P1
OE9A000410	1.03459	3.65162	1.56407	2.3347	0.0195593	0.058322	OE9A000410	ID=OE9A000410T1;Parent=OE9A000410;Name=OE9A000410T1;product=OE9A000410P1;Description=NETWORKED 3A-like;Ontology_term=GO:0003779
OE9A056221	1.03792	3.64766	1.70528	2.13903	0.0324328	0.086996	OE9A056221	ID=OE9A056221T1;Parent=OE9A056221;Name=OE9A056221T1;product=OE9A056221P1;Description=G-type lectin S-receptor-like serine threonine- kinase At4g27290 isoform X2;Ontology_term=GO:0000166%2C GO:0004672%2C GO:0016020%2C GO:0016310%2C GO:0048544
OE9A090871	6.8619	3.64631	0.820735	4.44274	8.88191e-06	8.13662e-05	OE9A090871	ID=OE9A090871T1;Parent=OE9A090871;Name=OE9A090871T1;product=OE9A090871P1
OE9A029229	3.39646	3.64501	1.47301	2.47453	0.013341	0.0428523	OE9A029229	ID=OE9A029229T1;Parent=OE9A029229;Name=OE9A029229T1;product=OE9A029229P1;Description=auxin efflux carrier component 2;Ontology_term=GO:0000323%2C GO:0005783%2C GO:0009723%2C GO:0009925%2C GO:0009926%2C GO:0009958%2C GO:0010252%2C GO:0010315%2C GO:0010329%2C GO:0016021%2C GO:0055085
OE9A105367	34.3788	3.64225	0.684314	5.32248	1.02362e-07	1.54603e-06	OE9A105367	ID=OE9A105367T1;Parent=OE9A105367;Name=OE9A105367T1;product=OE9A105367P1;Description=probable WRKY transcription factor 31;Ontology_term=GO:0003700%2C GO:0005667%2C GO:0006355%2C GO:0043565%2C GO:0045449
OE9A057973	38.4106	3.64187	0.764568	4.7633	1.9045e-06	2.07141e-05	OE9A057973	ID=OE9A057973T1;Parent=OE9A057973;Name=OE9A057973T1;product=OE9A057973P1;Description=jasmonate O-methyltransferase-like;Ontology_term=GO:0008168
OE9A052815	207491	3.64007	0.50634	7.18899	6.52728e-13	3.07987e-11	OE9A052815	ID=OE9A052815T1;Parent=OE9A052815;Name=OE9A052815T1;product=OE9A052815P1
OE9A107905	6.35964	3.63767	1.06427	3.418	0.00063082	0.00334067	OE9A107905	ID=OE9A107905T1;Parent=OE9A107905;Name=OE9A107905T1;product=OE9A107905P1
OE9A006649	2.55524	3.63598	1.61423	2.25246	0.0242934	0.069245	OE9A006649	ID=OE9A006649T1;Parent=OE9A006649;Name=OE9A006649T1;product=OE9A006649P1;Description=sorting nexin 1;Ontology_term=GO:0005622%2C GO:0007034%2C GO:0010252%2C GO:0030904%2C GO:0035091%2C GO:0048364
OE9A060545	2.56674	3.63587	1.48041	2.45599	0.0140496	0.0446496	OE9A060545	ID=OE9A060545T1;Parent=OE9A060545;Name=OE9A060545T1;product=OE9A060545P1;Description=signal recognition particle receptor subunit beta-like;Ontology_term=GO:0005525%2C GO:0005622%2C GO:0007264%2C GO:0016021
OE9A051863	353.549	3.63534	0.54768	6.63772	3.18583e-11	1.04378e-09	OE9A051863	ID=OE9A051863T1;Parent=OE9A051863;Name=OE9A051863T1;product=OE9A051863P1;Description=calcium-binding PBP1-like;Ontology_term=GO:0005509
OE9A030610	4.63572	3.6347	1.24106	2.92871	0.00340375	0.0139621	OE9A030610	ID=OE9A030610T1;Parent=OE9A030610;Name=OE9A030610T1;product=OE9A030610P1
OE9A106535	14.3364	3.63443	0.644497	5.63918	1.70862e-08	3.10644e-07	OE9A106535	ID=OE9A106535T1;Parent=OE9A106535;Name=OE9A106535T1;product=OE9A106535P1;Description=U-box domain-containing 13-like;Ontology_term=GO:0004842%2C GO:0005515%2C GO:0016567
OE9A065333	1.42929	3.63053	1.70596	2.12815	0.0333245	0.0888727	OE9A065333	ID=OE9A065333T1;Parent=OE9A065333;Name=OE9A065333T1;product=OE9A065333P1
OE9A111855	3.82728	3.62967	1.14267	3.17648	0.00149075	0.00697431	OE9A111855	ID=OE9A111855T1;Parent=OE9A111855;Name=OE9A111855T1;product=OE9A111855P1;Description=probable methyltransferase PMT15;Ontology_term=GO:0008168%2C GO:0016021%2C GO:0032259
OE9A029986	8.45413	3.62851	0.828625	4.37895	1.1925e-05	0.000105815	OE9A029986	ID=OE9A029986T1;Parent=OE9A029986;Name=OE9A029986T1;product=OE9A029986P1;Description=heavy-metal-associated domain-containing family;Ontology_term=GO:0030001%2C GO:0046872
OE9A034622	3.79329	3.62804	1.22309	2.96629	0.00301413	0.0125828	OE9A034622	ID=OE9A034622T1;Parent=OE9A034622;Name=OE9A034622T1;product=OE9A034622P1
OE9A008137	451.995	3.62557	0.602461	6.01794	1.76651e-09	3.94886e-08	OE9A008137	ID=OE9A008137T1;Parent=OE9A008137;Name=OE9A008137T1;product=OE9A008137P1;Description=DETOXIFICATION 49-like;Ontology_term=GO:0006855%2C GO:0015238%2C GO:0015297%2C GO:0016021
OE9A074600	1.39614	3.62339	1.55442	2.33102	0.0197521	0.0587652	OE9A074600	ID=OE9A074600T1;Parent=OE9A074600;Name=OE9A074600T1;product=OE9A074600P1;Description=uncharacterized membrane At1g06890;Ontology_term=GO:0008643%2C GO:0016021
OE9A010385	7.5681	3.62328	0.811929	4.46255	8.099e-06	7.50549e-05	OE9A010385	ID=OE9A010385T1;Parent=OE9A010385;Name=OE9A010385T1;product=OE9A010385P1;Description=O-glucosyltransferase 1-like;Ontology_term=GO:0006664%2C GO:0012505%2C GO:0016020%2C GO:0046527
OE9A072334	3.21604	3.62264	1.27396	2.8436	0.0044607	0.0174559	OE9A072334	ID=OE9A072334T1;Parent=OE9A072334;Name=OE9A072334T1;product=OE9A072334P1;Description=probable inactive receptor kinase RLK902;Ontology_term=GO:0004672%2C GO:0005524%2C GO:0006468
OE9A111524	38.002	3.62263	0.593812	6.10063	1.05648e-09	2.48697e-08	OE9A111524	ID=OE9A111524T2;Parent=OE9A111524;Name=OE9A111524T2;product=OE9A111524P2;Description=O-acyltransferase WSD1-like;Ontology_term=GO:0004144%2C GO:0005886%2C GO:0019432%2C GO:0042967%2C GO:0047196
OE9A068882	2.90046	3.61588	1.49719	2.41512	0.0157302	0.0489372	OE9A068882	ID=OE9A068882T1;Parent=OE9A068882;Name=OE9A068882T1;product=OE9A068882P1
OE9A003350	8.61524	3.61322	1.04013	3.47381	0.000513127	0.00279191	OE9A003350	ID=OE9A003350T1;Parent=OE9A003350;Name=OE9A003350T1;product=OE9A003350P1;Description=transcription factor GTE10-like isoform X1;Ontology_term=GO:0005515
OE9A090764	1.61825	3.6121	1.74669	2.06797	0.0386433	0.0995983	OE9A090764	ID=OE9A090764T1;Parent=OE9A090764;Name=OE9A090764T1;product=OE9A090764P1
OE9A073994	3.26134	3.61179	1.27437	2.83418	0.00459438	0.0179023	OE9A073994	ID=OE9A073994T1;Parent=OE9A073994;Name=OE9A073994T1;product=OE9A073994P1;Description=transcription factor MYB26-like;Ontology_term=GO:0003677
OE9A018027	6.94275	3.60948	1.06067	3.40304	0.000666416	0.00350478	OE9A018027	ID=OE9A018027T1;Parent=OE9A018027;Name=OE9A018027T1;product=OE9A018027P1;Description=LOB domain-containing 15;Ontology_term=GO:0005634
OE9A099025	1.82811	3.60918	1.62834	2.21648	0.0266588	0.0746462	OE9A099025	ID=OE9A099025T1;Parent=OE9A099025;Name=OE9A099025T1;product=OE9A099025P1;Description=receptor kinase At5g39000;Ontology_term=GO:0004672%2C GO:0005524%2C GO:0006468
OE9pt000082	11.6189	3.6088	0.921444	3.91646	8.9858e-05	0.000620901	OE9pt000082	ID=OE9pt000082T1;Parent=OE9pt000082;product=OE9pt000082P1;Description=ycf15
OE9A118290	690.558	3.60866	0.573587	6.29138	3.1465e-10	8.29306e-09	OE9A118290	ID=OE9A118290T1;Parent=OE9A118290;Name=OE9A118290T1;product=OE9A118290P1
OE9A029510	4.0596	3.60777	1.51217	2.38583	0.0170407	0.0522159	OE9A029510	ID=OE9A029510T1;Parent=OE9A029510;Name=OE9A029510T1;product=OE9A029510P1;Description=heat stress transcription factor B-2a-like;Ontology_term=GO:0003700%2C GO:0005634%2C GO:0005667%2C GO:0006355%2C GO:0043565%2C GO:0045449
OE9A019971	7.45805	3.60749	1.08575	3.32258	0.000891902	0.0045102	OE9A019971	ID=OE9A019971T1;Parent=OE9A019971;Name=OE9A019971T1;product=OE9A019971P1;Description=probable xyloglucan galactosyltransferase GT11;Ontology_term=GO:0016020
OE9A085096	2.00786	3.60739	1.53078	2.35657	0.0184447	0.0556131	OE9A085096	ID=OE9A085096T1;Parent=OE9A085096;Name=OE9A085096T1;product=OE9A085096P1
OE9A056829	13.6569	3.60534	0.749489	4.8104	1.50631e-06	1.68126e-05	OE9A056829	ID=OE9A056829T1;Parent=OE9A056829;Name=OE9A056829T1;product=OE9A056829P1;Description=ethylene-responsive transcription factor ERF027-like;Ontology_term=GO:0003677%2C GO:0003700%2C GO:0005667%2C GO:0006355%2C GO:0045449
OE9A090923	2.38114	3.60327	1.54132	2.33778	0.0193988	0.0579515	OE9A090923	ID=OE9A090923T1;Parent=OE9A090923;Name=OE9A090923T1;product=OE9A090923P1
OE9A082479	7.69239	3.60221	0.916364	3.93098	8.46e-05	0.000589684	OE9A082479	ID=OE9A082479T1;Parent=OE9A082479;Name=OE9A082479T1;product=OE9A082479P1;Description=probable serine threonine- kinase At1g54610;Ontology_term=GO:0004674%2C GO:0005524%2C GO:0006468%2C GO:0009069
OE9A041966	490.648	3.6008	0.404525	8.9013	5.51961e-19	8.20086e-17	OE9A041966	ID=OE9A041966T1;Parent=OE9A041966;Name=OE9A041966T1;product=OE9A041966P1;Description=PLANT CADMIUM RESISTANCE 2-like;Ontology_term=GO:0016021
OE9A042315	2.32821	3.59795	1.40796	2.55543	0.0106056	0.0355457	OE9A042315	ID=OE9A042315T1;Parent=OE9A042315;Name=OE9A042315T1;product=OE9A042315P1;Description=3-ketoacyl- synthase 6;Ontology_term=GO:0006633%2C GO:0016021%2C GO:0016747
OE9A037408	5.05329	3.59765	1.13362	3.17359	0.00150568	0.00703486	OE9A037408	ID=OE9A037408T1;Parent=OE9A037408;Name=OE9A037408T1;product=OE9A037408P1
OE9A008625	1.52466	3.59761	1.67039	2.15376	0.0312593	0.0845582	OE9A008625	ID=OE9A008625T1;Parent=OE9A008625;Name=OE9A008625T1;product=OE9A008625P1
OE9A095354	5.23038	3.5972	0.87586	4.10705	4.00737e-05	0.000306688	OE9A095354	ID=OE9A095354T1;Parent=OE9A095354;Name=OE9A095354T1;product=OE9A095354P1;Description=external alternative NAD(P)H-ubiquinone oxidoreductase B1, mitochondrial;Ontology_term=GO:0005509%2C GO:0005743%2C GO:0005758%2C GO:0005777%2C GO:0016491%2C GO:0055114
OE9A083113	4.14478	3.59506	1.20239	2.98993	0.00279044	0.011822	OE9A083113	ID=OE9A083113T1;Parent=OE9A083113;Name=OE9A083113T1;product=OE9A083113P1;Description=late blight resistance homolog R1A-10;Ontology_term=GO:0043531
OE9A041210	50.3589	3.59451	0.416365	8.63309	5.97187e-18	7.54014e-16	OE9A041210	ID=OE9A041210T1;Parent=OE9A041210;Name=OE9A041210T1;product=OE9A041210P1;Description=uncharacterized N-acetyltransferase p20-like;Ontology_term=GO:0006474%2C GO:0008080%2C GO:0042967
OE9A072394	119.827	3.59171	0.702063	5.11594	3.12183e-07	4.16731e-06	OE9A072394	ID=OE9A072394T1;Parent=OE9A072394;Name=OE9A072394T1;product=OE9A072394P1
OE9A042023	4.98883	3.59163	0.829011	4.33243	1.47474e-05	0.000127632	OE9A042023	ID=OE9A042023T1;Parent=OE9A042023;Name=OE9A042023T1;product=OE9A042023P1
OE9A069120	2.14653	3.59015	1.63569	2.19489	0.0281713	0.0779893	OE9A069120	ID=OE9A069120T1;Parent=OE9A069120;Name=OE9A069120T1;product=OE9A069120P1;Description=methyl- -binding domain-containing 2-like;Ontology_term=GO:0003677%2C GO:0005634%2C GO:0008270
OE9A036166	10.1425	3.5884	0.695947	5.15613	2.52106e-07	3.45042e-06	OE9A036166	ID=OE9A036166T1;Parent=OE9A036166;Name=OE9A036166T1;product=OE9A036166P1
OE9mt000043	17.5233	3.58762	0.680619	5.27112	1.35597e-07	1.9915e-06	OE9mt000043	ID=OE9mt000043T1;Parent=OE9mt000043;product=OE9mt000043P1;Description=rps7;Name=OE9mt000043T1
OE9A065121	5.09175	3.58717	1.11498	3.21726	0.0012942	0.00620007	OE9A065121	ID=OE9A065121T1;Parent=OE9A065121;Name=OE9A065121T1;product=OE9A065121P1
OE9A029308	3.62972	3.5849	1.47317	2.43346	0.0149551	0.0469834	OE9A029308	ID=OE9A029308T1;Parent=OE9A029308;Name=OE9A029308T1;product=OE9A029308P1;Description=lipopolysaccharide core biosynthesis mannosyltransferase lpsb;Ontology_term=GO:0016021
OE9A111713	3.42293	3.58393	1.25721	2.8507	0.00436233	0.0171318	OE9A111713	ID=OE9A111713T1;Parent=OE9A111713;Name=OE9A111713T1;product=OE9A111713P1
OE9A081485	2.09824	3.58298	1.66674	2.1497	0.0315791	0.0852006	OE9A081485	ID=OE9A081485T1;Parent=OE9A081485;Name=OE9A081485T1;product=OE9A081485P1
OE9A084022	8.89252	3.58246	0.78315	4.57442	4.77537e-06	4.68215e-05	OE9A084022	ID=OE9A084022T1;Parent=OE9A084022;Name=OE9A084022T1;product=OE9A084022P1
OE9A003657	268.433	3.58019	0.315808	11.3366	8.64137e-30	7.46053e-27	OE9A003657	ID=OE9A003657T1;Parent=OE9A003657;Name=OE9A003657T1;product=OE9A003657P1;Description=ammonium transporter 3 member 1-like;Ontology_term=GO:0005887%2C GO:0008519%2C GO:0015695%2C GO:0019740%2C GO:0072488
OE9A068977	3.68903	3.57596	1.30322	2.74394	0.00607059	0.0224729	OE9A068977	ID=OE9A068977T1;Parent=OE9A068977;Name=OE9A068977T1;product=OE9A068977P1;Description=Sterol 24-C-methyltransferase;Ontology_term=GO:0005737%2C GO:0008757%2C GO:0016021%2C GO:0032259
OE9A064256	5.12847	3.57461	1.22878	2.90907	0.00362504	0.0147176	OE9A064256	ID=OE9A064256T1;Parent=OE9A064256;Name=OE9A064256T1;product=OE9A064256P1;Description=transcription factor HHO5-like;Ontology_term=GO:0003677
OE9A097748	1.92525	3.5746	1.53221	2.33297	0.0196496	0.0585527	OE9A097748	ID=OE9A097748T1;Parent=OE9A097748;Name=OE9A097748T1;product=OE9A097748P1;Description=glutamate receptor -like;Ontology_term=GO:0004970%2C GO:0006811%2C GO:0007268%2C GO:0016021%2C GO:0035235
OE9A080699	4.5306	3.57336	1.15937	3.08217	0.002055	0.00912251	OE9A080699	ID=OE9A080699T1;Parent=OE9A080699;Name=OE9A080699T1;product=OE9A080699P1;Description=cytokinin dehydrogenase 3-like;Ontology_term=GO:0009690%2C GO:0016614%2C GO:0019139%2C GO:0050660%2C GO:0055114
OE9A000462	4.70686	3.57318	1.64064	2.17792	0.0294119	0.0806052	OE9A000462	ID=OE9A000462T1;Parent=OE9A000462;Name=OE9A000462T1;product=OE9A000462P1;Description=basic 7S globulin-like;Ontology_term=GO:0004190%2C GO:0006508%2C GO:0030163
OE9A047567	4.12318	3.57277	1.28195	2.78699	0.00532007	0.020193	OE9A047567	ID=OE9A047567T1;Parent=OE9A047567;Name=OE9A047567T1;product=OE9A047567P1;Description=probable receptor kinase At1g11050;Ontology_term=GO:0004674%2C GO:0005524%2C GO:0006468%2C GO:0009069%2C GO:0016021
OE9A107171	2.02965	3.57146	1.30338	2.74016	0.00614093	0.022686	OE9A107171	ID=OE9A107171T1;Parent=OE9A107171;Name=OE9A107171T1;product=OE9A107171P1;Description=premnaspirodiene oxygenase-like;Ontology_term=GO:0004497%2C GO:0005506%2C GO:0016705%2C GO:0020037%2C GO:0055114
OE9A074133	3.39932	3.57086	1.42149	2.51206	0.012003	0.0393537	OE9A074133	ID=OE9A074133T1;Parent=OE9A074133;Name=OE9A074133T1;product=OE9A074133P1;Description=1-aminocyclopropane-1-carboxylate oxidase 1;Ontology_term=GO:0046872%2C GO:0051213%2C GO:0055114
OE9A083065	3.4706	3.56854	1.14937	3.10478	0.0019042	0.00856852	OE9A083065	ID=OE9A083065T1;Parent=OE9A083065;Name=OE9A083065T1;product=OE9A083065P1
OE9A059910	700.401	3.56825	0.371786	9.5976	8.18245e-22	1.82783e-19	OE9A059910	ID=OE9A059910T1;Parent=OE9A059910;Name=OE9A059910T1;product=OE9A059910P1;Description=sodium calcium exchanger NCL2-like;Ontology_term=GO:0005509%2C GO:0016021%2C GO:0055085
OE9A069685	3.80941	3.56821	1.083	3.29475	0.00098508	0.00490835	OE9A069685	ID=OE9A069685T1;Parent=OE9A069685;Name=OE9A069685T1;product=OE9A069685P1
OE9A053255	4.26547	3.5675	1.36137	2.62052	0.00877946	0.0303847	OE9A053255	ID=OE9A053255T1;Parent=OE9A053255;Name=OE9A053255T1;product=OE9A053255P1
OE9A095528	37.1355	3.56658	0.490031	7.27828	3.38101e-13	1.69284e-11	OE9A095528	ID=OE9A095528T1;Parent=OE9A095528;Name=OE9A095528T1;product=OE9A095528P1
OE9pt000019	324.826	3.56496	0.356895	9.98883	1.70581e-23	5.34218e-21	OE9pt000019	ID=OE9pt000019T1;Parent=OE9pt000019;product=OE9pt000019P1;Description=rps14
OE9A116917	1.15294	3.56446	1.54837	2.30208	0.0213308	0.0625646	OE9A116917	ID=OE9A116917T1;Parent=OE9A116917;Name=OE9A116917T1;product=OE9A116917P1
OE9A089749	20.2621	3.56432	0.610479	5.83857	5.26503e-09	1.06044e-07	OE9A089749	ID=OE9A089749T1;Parent=OE9A089749;Name=OE9A089749T1;product=OE9A089749P1
OE9A008412	2.8762	3.56202	1.14182	3.11959	0.00181102	0.00822336	OE9A008412	ID=OE9A008412T1;Parent=OE9A008412;Name=OE9A008412T1;product=OE9A008412P1
OE9A086970	2.39936	3.56009	1.53499	2.31929	0.0203792	0.0603275	OE9A086970	ID=OE9A086970T1;Parent=OE9A086970;Name=OE9A086970T1;product=OE9A086970P1
OE9A082849	12.6683	3.55449	0.868808	4.09123	4.29094e-05	0.000325427	OE9A082849	ID=OE9A082849T1;Parent=OE9A082849;Name=OE9A082849T1;product=OE9A082849P1;Description=gamma-glutamyl peptidase 5-like;Ontology_term=GO:0005829%2C GO:0006508%2C GO:0006541%2C GO:0008233%2C GO:0016740%2C GO:0019760
OE9A068697	2.82621	3.55445	1.12614	3.15631	0.00159776	0.00738355	OE9A068697	ID=OE9A068697T1;Parent=OE9A068697;Name=OE9A068697T1;product=OE9A068697P1;Description=60S ribosomal L23;Ontology_term=GO:0003735%2C GO:0005730%2C GO:0006412%2C GO:0022625%2C GO:0042254%2C GO:0070180
OE9A000533	4.3839	3.55254	1.21485	2.92427	0.00345265	0.0141309	OE9A000533	ID=OE9A000533T1;Parent=OE9A000533;Name=OE9A000533T1;product=OE9A000533P1
OE9A006342	12.7191	3.55227	0.77308	4.59496	4.32839e-06	4.28998e-05	OE9A006342	ID=OE9A006342T1;Parent=OE9A006342;Name=OE9A006342T1;product=OE9A006342P1;Description=DETOXIFICATION 51-like;Ontology_term=GO:0006855%2C GO:0015238%2C GO:0015297%2C GO:0016021
OE9A029688	3.6016	3.55205	1.13399	3.13234	0.00173418	0.00792514	OE9A029688	ID=OE9A029688T1;Parent=OE9A029688;Name=OE9A029688T1;product=OE9A029688P1
OE9A074185	2.21145	3.54962	1.47777	2.40201	0.0163055	0.050349	OE9A074185	ID=OE9A074185T1;Parent=OE9A074185;Name=OE9A074185T1;product=OE9A074185P1
OE9A102599	2.90121	3.5494	1.27655	2.78047	0.00542805	0.0204959	OE9A102599	ID=OE9A102599T1;Parent=OE9A102599;Name=OE9A102599T1;product=OE9A102599P1
OE9pt000064	11.9297	3.54698	0.840181	4.22168	2.4249e-05	0.000197453	OE9pt000064	ID=OE9pt000064T1;Parent=OE9pt000064;product=OE9pt000064P1;Description=ycf15
OE9A080813	2.33214	3.54629	1.59915	2.21761	0.0265815	0.0744777	OE9A080813	ID=OE9A080813T1;Parent=OE9A080813;Name=OE9A080813T1;product=OE9A080813P1
OE9A032860	8.68262	3.54336	0.89233	3.97091	7.15986e-05	0.000509614	OE9A032860	ID=OE9A032860T1;Parent=OE9A032860;Name=OE9A032860T1;product=OE9A032860P1;Description=patatin 2;Ontology_term=GO:0004620%2C GO:0005737%2C GO:0009395%2C GO:0016020%2C GO:0046486%2C GO:0047372
OE9A114988	3.17492	3.54167	1.19049	2.97496	0.0029303	0.0123084	OE9A114988	ID=OE9A114988T1;Parent=OE9A114988;Name=OE9A114988T1;product=OE9A114988P1
OE9A016020	5.77416	3.53547	0.916103	3.85926	0.000113733	0.000764538	OE9A016020	ID=OE9A016020T1;Parent=OE9A016020;Name=OE9A016020T1;product=OE9A016020P1
OE9A030715	2.20479	3.53467	1.70321	2.07529	0.0379593	0.0982236	OE9A030715	ID=OE9A030715T1;Parent=OE9A030715;Name=OE9A030715T1;product=OE9A030715P1
OE9A041564	11.8001	3.53408	0.72616	4.8668	1.13418e-06	1.30371e-05	OE9A041564	ID=OE9A041564T1;Parent=OE9A041564;Name=OE9A041564T1;product=OE9A041564P1;Description=dammarenediol II synthase-like;Ontology_term=GO:0016021%2C GO:0016866
OE9A099659	71.2425	3.53352	0.606698	5.82418	5.73935e-09	1.14801e-07	OE9A099659	ID=OE9A099659T1;Parent=OE9A099659;Name=OE9A099659T1;product=OE9A099659P1;Description=premnaspirodiene oxygenase-like;Ontology_term=GO:0004497%2C GO:0005506%2C GO:0016021%2C GO:0016705%2C GO:0020037%2C GO:0055114
OE9A114328	1.97114	3.52268	1.25589	2.80492	0.00503288	0.0192724	OE9A114328	ID=OE9A114328T1;Parent=OE9A114328;Name=OE9A114328T1;product=OE9A114328P1;Description=peroxidase 27-like;Ontology_term=GO:0004601%2C GO:0006804%2C GO:0006979%2C GO:0009987%2C GO:0020037%2C GO:0055114
OE9A080195	6.88666	3.52233	0.926085	3.80346	0.00014269	0.000928894	OE9A080195	ID=OE9A080195T1;Parent=OE9A080195;Name=OE9A080195T1;product=OE9A080195P1;Description=lipid phosphate phosphatase epsilon 2, chloroplastic-like;Ontology_term=GO:0044237
OE9A039596	58.4433	3.51878	0.503221	6.99251	2.7001e-12	1.12307e-10	OE9A039596	ID=OE9A039596T1;Parent=OE9A039596;Name=OE9A039596T1;product=OE9A039596P1;Description=Serine threonine kinase;Ontology_term=GO:0004672%2C GO:0005509%2C GO:0005515%2C GO:0005524%2C GO:0006468%2C GO:0030247
OE9A121470	120.055	3.51518	0.423283	8.30457	1.00178e-16	1.04921e-14	OE9A121470	ID=OE9A121470T1;Parent=OE9A121470;Name=OE9A121470T1;product=OE9A121470P1;Description=BON1-associated 2-like;Ontology_term=GO:0005515
OE9A081346	1.69517	3.51502	1.51101	2.32627	0.0200043	0.0593937	OE9A081346	ID=OE9A081346T1;Parent=OE9A081346;Name=OE9A081346T1;product=OE9A081346P1
OE9pt000022	181.568	3.51481	0.329912	10.6538	1.67407e-26	8.62523e-24	OE9pt000022	ID=OE9pt000022T1;Parent=OE9pt000022;product=OE9pt000022P1;Description=ycf3
OE9A014648	16.6193	3.51374	0.675993	5.19789	2.01564e-07	2.81414e-06	OE9A014648	ID=OE9A014648T1;Parent=OE9A014648;Name=OE9A014648T1;product=OE9A014648P1;Description=GDP-L-galactose phosphorylase 1-like;Ontology_term=GO:0005737%2C GO:0006006%2C GO:0080048
OE9A026392	3.83908	3.50505	1.57071	2.23151	0.0256473	0.0723679	OE9A026392	ID=OE9A026392T1;Parent=OE9A026392;Name=OE9A026392T1;product=OE9A026392P1;Description=serine threonine- kinase BLUS1;Ontology_term=GO:0004672%2C GO:0005524%2C GO:0006468
OE9A048336	26494	3.49771	0.51939	6.73427	1.64754e-11	5.76441e-10	OE9A048336	ID=OE9A048336T1;Parent=OE9A048336;Name=OE9A048336T1;product=OE9A048336P1
OE9A106976	4.65308	3.49768	1.51758	2.30478	0.0211788	0.0621767	OE9A106976	ID=OE9A106976T1;Parent=OE9A106976;Name=OE9A106976T1;product=OE9A106976P1;Description=agamous-like MADS-box AGL62;Ontology_term=GO:0003677%2C GO:0046983
OE9A062930	6.00758	3.4955	1.43591	2.43435	0.0149187	0.0468874	OE9A062930	ID=OE9A062930T1;Parent=OE9A062930;Name=OE9A062930T1;product=OE9A062930P1;Description=G-type lectin S-receptor-like serine threonine- kinase RLK1;Ontology_term=GO:0004674%2C GO:0005524%2C GO:0006468%2C GO:0009069%2C GO:0016020
OE9A010425	4.694	3.49428	1.21337	2.8798	0.00397922	0.0158613	OE9A010425	ID=OE9A010425T1;Parent=OE9A010425;Name=OE9A010425T1;product=OE9A010425P1;Description=N-terminal acetyltransferase A, auxiliary subunit;Ontology_term=GO:0005515
OE9A084316	5.53608	3.4907	1.08734	3.21031	0.00132592	0.00632075	OE9A084316	ID=OE9A084316T1;Parent=OE9A084316;Name=OE9A084316T1;product=OE9A084316P1;Description=probable inactive serine threonine- kinase fnkC;Ontology_term=GO:0005515
OE9A118134	4.51974	3.4906	1.07838	3.23691	0.00120833	0.00585099	OE9A118134	ID=OE9A118134T1;Parent=OE9A118134;Name=OE9A118134T1;product=OE9A118134P1;Description=polygalacturonase-like;Ontology_term=GO:0004650%2C GO:0005576%2C GO:0005982%2C GO:0005985%2C GO:0071555
OE9A042789	4.64476	3.48839	1.17419	2.97089	0.00296938	0.012435	OE9A042789	ID=OE9A042789T1;Parent=OE9A042789;Name=OE9A042789T1;product=OE9A042789P1;Description=polyadenylate-binding 2;Ontology_term=GO:0000166%2C GO:0003676
OE9A118301	13.0303	3.48818	0.726701	4.80002	1.58647e-06	1.76027e-05	OE9A118301	ID=OE9A118301T1;Parent=OE9A118301;Name=OE9A118301T1;product=OE9A118301P1;Description=;Ontology_term=GO:0004129%2C GO:0006123%2C GO:0015992%2C GO:0045277
OE9A043560	161.024	3.48801	0.677965	5.14481	2.67786e-07	3.63079e-06	OE9A043560	ID=OE9A043560T1;Parent=OE9A043560;Name=OE9A043560T1;product=OE9A043560P1
OE9A046053	5.39674	3.48471	1.03651	3.36195	0.000773955	0.00399535	OE9A046053	ID=OE9A046053T1;Parent=OE9A046053;Name=OE9A046053T1;product=OE9A046053P1;Description=salicylic acid-binding 2-like;Ontology_term=GO:0016787
OE9A003540	170.743	3.48011	0.888113	3.91854	8.90856e-05	0.000616497	OE9A003540	ID=OE9A003540T1;Parent=OE9A003540;Name=OE9A003540T1;product=OE9A003540P1;Description=blue copper -like;Ontology_term=GO:0006118%2C GO:0009055
OE9A105487	5.85747	3.4789	1.02454	3.39557	0.000684863	0.00358761	OE9A105487	ID=OE9A105487T1;Parent=OE9A105487;Name=OE9A105487T1;product=OE9A105487P1;Description=probable beta-1,3-galactosyltransferase 2;Ontology_term=GO:0016020%2C GO:0016740
OE9A042563	170.328	3.47728	0.885758	3.92577	8.64529e-05	0.000600359	OE9A042563	ID=OE9A042563T1;Parent=OE9A042563;Name=OE9A042563T1;product=OE9A042563P1;Description=blue copper -like;Ontology_term=GO:0006118%2C GO:0009055
OE9A009244	3.39659	3.47511	1.59286	2.18168	0.0291332	0.0800864	OE9A009244	ID=OE9A009244T1;Parent=OE9A009244;Name=OE9A009244T1;product=OE9A009244P1
OE9A104043	2.45204	3.47429	1.33082	2.61063	0.00903747	0.031079	OE9A104043	ID=OE9A104043T1;Parent=OE9A104043;Name=OE9A104043T1;product=OE9A104043P1
OE9A088550	7.2963	3.47377	0.924172	3.75879	0.000170736	0.00108081	OE9A088550	ID=OE9A088550T1;Parent=OE9A088550;Name=OE9A088550T1;product=OE9A088550P1;Description=serine threonine- kinase tricorner-like;Ontology_term=GO:0004674%2C GO:0005524%2C GO:0005622%2C GO:0009069%2C GO:0018105%2C GO:0035556
OE9A111009	33.3105	3.47158	1.07053	3.24285	0.00118341	0.00574598	OE9A111009	ID=OE9A111009T1;Parent=OE9A111009;Name=OE9A111009T1;product=OE9A111009P1
OE9pt000012	51.0378	3.4713	0.402753	8.61892	6.75891e-18	8.43385e-16	OE9pt000012	ID=OE9pt000012T1;Parent=OE9pt000012;product=OE9pt000012P1;Description=rpoC1
OE9A066674	184.823	3.47091	0.386245	8.98631	2.55679e-19	4.04327e-17	OE9A066674	ID=OE9A066674T1;Parent=OE9A066674;Name=OE9A066674T1;product=OE9A066674P1;Description=wall-associated receptor kinase 2-like;Ontology_term=GO:0004672%2C GO:0005509%2C GO:0005515%2C GO:0005524%2C GO:0006468%2C GO:0030247
OE9A050819	192.297	3.47067	0.374299	9.27245	1.81924e-20	3.33988e-18	OE9A050819	ID=OE9A050819T1;Parent=OE9A050819;Name=OE9A050819T1;product=OE9A050819P1;Description=high-affinity nitrate transporter -like;Ontology_term=GO:0010167%2C GO:0015706%2C GO:0016021
OE9A111642	3.80808	3.4678	1.28809	2.69219	0.00709845	0.0255756	OE9A111642	ID=OE9A111642T1;Parent=OE9A111642;Name=OE9A111642T1;product=OE9A111642P1;Description=zinc finger CONSTANS-LIKE 10-like isoform X1;Ontology_term=GO:0005515%2C GO:0005622%2C GO:0008270
OE9A080952	2.55936	3.46667	1.44867	2.39299	0.0167115	0.0513844	OE9A080952	ID=OE9A080952T1;Parent=OE9A080952;Name=OE9A080952T1;product=OE9A080952P1
OE9A018673	8.37271	3.46561	0.721844	4.80105	1.57834e-06	1.75308e-05	OE9A018673	ID=OE9A018673T1;Parent=OE9A018673;Name=OE9A018673T1;product=OE9A018673P1
OE9A000822	2.59297	3.46549	1.27733	2.71308	0.00666612	0.0242753	OE9A000822	ID=OE9A000822T1;Parent=OE9A000822;Name=OE9A000822T1;product=OE9A000822P1;Description=transcription factor HHO3-like;Ontology_term=GO:0003677
OE9A091467	6.38529	3.46365	0.806993	4.29204	1.77039e-05	0.00014985	OE9A091467	ID=OE9A091467T1;Parent=OE9A091467;Name=OE9A091467T1;product=OE9A091467P1;Description=probable amino-acid acetyltransferase NAGS1, chloroplastic;Ontology_term=GO:0000051%2C GO:0004042%2C GO:0005737%2C GO:0006526%2C GO:0042967
OE9A028369	9.0882	3.46042	0.776426	4.45685	8.31712e-06	7.68312e-05	OE9A028369	ID=OE9A028369T1;Parent=OE9A028369;Name=OE9A028369T1;product=OE9A028369P1
OE9A031767	3.28411	3.46023	1.46439	2.36292	0.0181316	0.0548845	OE9A031767	ID=OE9A031767T1;Parent=OE9A031767;Name=OE9A031767T1;product=OE9A031767P1;Description=cullin-4-like;Ontology_term=GO:0006511%2C GO:0031461%2C GO:0031625
OE9A034570	1.68926	3.45951	1.52882	2.26287	0.023644	0.0678907	OE9A034570	ID=OE9A034570T1;Parent=OE9A034570;Name=OE9A034570T1;product=OE9A034570P1
OE9A055915	1.87445	3.45578	1.63295	2.11629	0.0343206	0.0909822	OE9A055915	ID=OE9A055915T1;Parent=OE9A055915;Name=OE9A055915T1;product=OE9A055915P1;Description=AP2-like ethylene-responsive transcription factor AIL6;Ontology_term=GO:0003677%2C GO:0003700%2C GO:0005667%2C GO:0006355%2C GO:0045449
OE9A002846	14.4473	3.45409	1.22868	2.81123	0.00493531	0.018967	OE9A002846	ID=OE9A002846T1;Parent=OE9A002846;Name=OE9A002846T1;product=OE9A002846P1;Description=peroxidase 10;Ontology_term=GO:0004601%2C GO:0005576%2C GO:0006804%2C GO:0006979%2C GO:0016021%2C GO:0020037%2C GO:0042744%2C GO:0046872%2C GO:0055114%2C GO:0098869
OE9A104800	4.32337	3.45384	1.14744	3.01003	0.00261221	0.0111661	OE9A104800	ID=OE9A104800T1;Parent=OE9A104800;Name=OE9A104800T1;product=OE9A104800P1;Description=calmodulin-binding 60 A-like isoform X1;Ontology_term=GO:0005516%2C GO:0006950
OE9A084101	18.1802	3.45352	0.576132	5.99433	2.0433e-09	4.50146e-08	OE9A084101	ID=OE9A084101T1;Parent=OE9A084101;Name=OE9A084101T1;product=OE9A084101P1;Description=cannabidiolic acid synthase-like;Ontology_term=GO:0016614%2C GO:0050660%2C GO:0055114
OE9A070823	2.84768	3.4515	1.66667	2.0709	0.0383682	0.0990225	OE9A070823	ID=OE9A070823T1;Parent=OE9A070823;Name=OE9A070823T1;product=OE9A070823P1;Description=UDP-glycosyltransferase 76F1-like;Ontology_term=GO:0009813%2C GO:0043231%2C GO:0052696%2C GO:0080043%2C GO:0080044
OE9A058759	13.0977	3.45008	0.698427	4.93978	7.82092e-07	9.364e-06	OE9A058759	ID=OE9A058759T1;Parent=OE9A058759;Name=OE9A058759T1;product=OE9A058759P1;Description=probable quinone oxidoreductase;Ontology_term=GO:0008270%2C GO:0016491%2C GO:0055114
OE9pt000050	593.461	3.44628	0.29761	11.5798	5.21523e-31	5.87991e-28	OE9pt000050	ID=OE9pt000050T1;Parent=OE9pt000050;product=OE9pt000050P1;Description=petB
OE9A107339	192.846	3.44558	0.346269	9.95059	2.50703e-23	7.48455e-21	OE9A107339	ID=OE9A107339T1;Parent=OE9A107339;Name=OE9A107339T1;product=OE9A107339P1;Description=LRR receptor-like serine threonine- kinase GSO1;Ontology_term=GO:0005515
OE9A059461	21.8272	3.44539	0.526788	6.54038	6.13613e-11	1.89751e-09	OE9A059461	ID=OE9A059461T1;Parent=OE9A059461;Name=OE9A059461T1;product=OE9A059461P1;Description=glyoxylate hydroxypyruvate reductase HPR3-like;Ontology_term=GO:0016616%2C GO:0051287%2C GO:0055114
OE9pt000017	1424.54	3.44496	0.298195	11.5527	7.1514e-31	7.61482e-28	OE9pt000017	ID=OE9pt000017T1;Parent=OE9pt000017;product=OE9pt000017P1;Description=psbC
OE9A021208	3.92905	3.44375	0.969808	3.55095	0.000383837	0.00217553	OE9A021208	ID=OE9A021208T1;Parent=OE9A021208;Name=OE9A021208T1;product=OE9A021208P1;Description=phosphoglycerate mutase AT74H;Ontology_term=GO:0003824%2C GO:0008152
OE9A078496	1.73306	3.43725	1.39941	2.4562	0.0140414	0.0446351	OE9A078496	ID=OE9A078496T1;Parent=OE9A078496;Name=OE9A078496T1;product=OE9A078496P1;Description=flavonoid 3 -monooxygenase-like;Ontology_term=GO:0005506%2C GO:0016705%2C GO:0020037%2C GO:0055114
OE9A053892	63.2059	3.43718	0.945075	3.63694	0.000275897	0.00163937	OE9A053892	ID=OE9A053892T1;Parent=OE9A053892;Name=OE9A053892T1;product=OE9A053892P1;Description=cytochrome P450 71A6-like;Ontology_term=GO:0005506%2C GO:0016705%2C GO:0020037%2C GO:0055114
OE9A091692	26.4658	3.43502	0.653057	5.25991	1.4413e-07	2.10328e-06	OE9A091692	ID=OE9A091692T2;Parent=OE9A091692;Name=OE9A091692T2;product=OE9A091692P2;Description=G-type lectin S-receptor-like serine threonine- kinase At4g27290 isoform X1;Ontology_term=GO:0004674%2C GO:0005524%2C GO:0006468%2C GO:0009069%2C GO:0048544
OE9A095341	2.86568	3.43211	1.49006	2.30335	0.0212594	0.0623839	OE9A095341	ID=OE9A095341T1;Parent=OE9A095341;Name=OE9A095341T1;product=OE9A095341P1;Description=Ulp1 protease family, C-terminal catalytic domain containing;Ontology_term=GO:0006508%2C GO:0008234
OE9A040271	3.24007	3.4295	1.02269	3.3534	0.000798258	0.00410093	OE9A040271	ID=OE9A040271T1;Parent=OE9A040271;Name=OE9A040271T1;product=OE9A040271P1
OE9A118922	2.12005	3.42657	1.37443	2.49309	0.0126637	0.0410814	OE9A118922	ID=OE9A118922T1;Parent=OE9A118922;Name=OE9A118922T1;product=OE9A118922P1;Description=superoxide dismutase [Cu-Zn], chloroplastic;Ontology_term=GO:0004784%2C GO:0009570%2C GO:0009579%2C GO:0019430%2C GO:0046872%2C GO:0048046%2C GO:0055114%2C GO:0071486
OE9A032731	15.0547	3.42595	0.625762	5.47485	4.37888e-08	7.31968e-07	OE9A032731	ID=OE9A032731T1;Parent=OE9A032731;Name=OE9A032731T1;product=OE9A032731P1;Description=auxin response factor 9;Ontology_term=GO:0003677%2C GO:0005634%2C GO:0006355%2C GO:0009725
OE9A032110	760.531	3.42566	0.380866	8.9944	2.37521e-19	3.77482e-17	OE9A032110	ID=OE9A032110T1;Parent=OE9A032110;Name=OE9A032110T1;product=OE9A032110P1;Description=major allergen Pru ar 1-like;Ontology_term=GO:0004864%2C GO:0004872%2C GO:0005634%2C GO:0005737%2C GO:0006952%2C GO:0009607%2C GO:0009738%2C GO:0010427%2C GO:0043086%2C GO:0080163
OE9A109793	40.819	3.42552	0.458053	7.47844	7.52096e-14	4.35234e-12	OE9A109793	ID=OE9A109793T1;Parent=OE9A109793;Name=OE9A109793T1;product=OE9A109793P1
OE9A106212	774.938	3.42547	0.557705	6.14209	8.1444e-10	1.98145e-08	OE9A106212	ID=OE9A106212T1;Parent=OE9A106212;Name=OE9A106212T1;product=OE9A106212P1;Description=universal stress A;Ontology_term=GO:0006950
OE9A083767	14.8208	3.42477	0.819141	4.18093	2.90325e-05	0.000231333	OE9A083767	ID=OE9A083767T1;Parent=OE9A083767;Name=OE9A083767T1;product=OE9A083767P1;Description=U3 small nucleolar ribonucleo MPP10 isoform X2;Ontology_term=GO:0005732%2C GO:0019013%2C GO:0030490%2C GO:0032040%2C GO:0034457
OE9A085416	170.564	3.42455	0.458741	7.46511	8.32329e-14	4.782e-12	OE9A085416	ID=OE9A085416T1;Parent=OE9A085416;Name=OE9A085416T1;product=OE9A085416P1;Description=Serine threonine kinase;Ontology_term=GO:0004672%2C GO:0005524%2C GO:0006468
OE9A007393	5.61743	3.42401	1.06291	3.22135	0.00127589	0.00612323	OE9A007393	ID=OE9A007393T1;Parent=OE9A007393;Name=OE9A007393T1;product=OE9A007393P1
OE9A030969	5.60744	3.42387	1.28585	2.66273	0.00775098	0.027465	OE9A030969	ID=OE9A030969T1;Parent=OE9A030969;Name=OE9A030969T1;product=OE9A030969P1;Description=gibberellin 2-beta-dioxygenase 1-like;Ontology_term=GO:0005506%2C GO:0009416%2C GO:0045487%2C GO:0052634%2C GO:0055114
OE9pt000075	25.7891	3.42321	0.459554	7.44899	9.40594e-14	5.31793e-12	OE9pt000075	ID=OE9pt000075T1;Parent=OE9pt000075;product=OE9pt000075P1;Description=ndhI
OE9A016667	3.4318	3.42232	1.47769	2.316	0.0205584	0.0607172	OE9A016667	ID=OE9A016667T1;Parent=OE9A016667;Name=OE9A016667T1;product=OE9A016667P1;Description=alcohol-forming fatty acyl- reductase-like;Ontology_term=GO:0010345%2C GO:0035336%2C GO:0043231%2C GO:0055114%2C GO:0080019
OE9A043929	6.91869	3.4222	0.759173	4.5078	6.55028e-06	6.19793e-05	OE9A043929	ID=OE9A043929T1;Parent=OE9A043929;Name=OE9A043929T1;product=OE9A043929P1
OE9A038228	1384.02	3.42104	0.743973	4.59834	4.25875e-06	4.2341e-05	OE9A038228	ID=OE9A038228T1;Parent=OE9A038228;Name=OE9A038228T1;product=OE9A038228P1;Description=salicylic acid-binding 2;Ontology_term=GO:0009862%2C GO:0016042%2C GO:0016298%2C GO:0080031
OE9A088008	3.56989	3.41878	1.15711	2.95458	0.00313093	0.0130109	OE9A088008	ID=OE9A088008T1;Parent=OE9A088008;Name=OE9A088008T1;product=OE9A088008P1
OE9A027715	12.7486	3.41819	0.56223	6.07969	1.20416e-09	2.7975e-08	OE9A027715	ID=OE9A027715T1;Parent=OE9A027715;Name=OE9A027715T1;product=OE9A027715P1
OE9A077906	6.0041	3.41782	0.909714	3.75702	0.000171946	0.00108722	OE9A077906	ID=OE9A077906T1;Parent=OE9A077906;Name=OE9A077906T1;product=OE9A077906P1;Description=vacuolar iron transporter homolog 1-like;Ontology_term=GO:0016021
OE9mt000032	54.0826	3.41759	0.493112	6.93065	4.18914e-12	1.68749e-10	OE9mt000032	ID=OE9mt000032T1;Parent=OE9mt000032;product=OE9mt000032P1;Description=atp6;Name=OE9mt000032T1
OE9A018733	10.5496	3.41479	0.732368	4.66267	3.12132e-06	3.20913e-05	OE9A018733	ID=OE9A018733T1;Parent=OE9A018733;Name=OE9A018733T1;product=OE9A018733P1;Description=expansin-A7-like;Ontology_term=GO:0005576%2C GO:0009664%2C GO:0016021
OE9A068952	10.7213	3.41407	0.810586	4.21186	2.53276e-05	0.000205138	OE9A068952	ID=OE9A068952T1;Parent=OE9A068952;Name=OE9A068952T1;product=OE9A068952P1;Description=SAR DEFICIENT 1;Ontology_term=GO:0005516%2C GO:0006950
OE9A115829	48.4077	3.41399	0.492609	6.93042	4.19592e-12	1.68809e-10	OE9A115829	ID=OE9A115829T1;Parent=OE9A115829;Name=OE9A115829T1;product=OE9A115829P1
OE9A090722	12.7348	3.41026	0.831713	4.10029	4.1264e-05	0.000314592	OE9A090722	ID=OE9A090722T1;Parent=OE9A090722;Name=OE9A090722T1;product=OE9A090722P1;Description=serine threonine phosphatase 2A regulatory subunit B beta-like;Ontology_term=GO:0005509
OE9A023051	4.9164	3.4056	1.18615	2.87114	0.00408988	0.0162355	OE9A023051	ID=OE9A023051T1;Parent=OE9A023051;Name=OE9A023051T1;product=OE9A023051P1
OE9A004042	1.56386	3.40218	1.41233	2.40891	0.0160003	0.0496084	OE9A004042	ID=OE9A004042T1;Parent=OE9A004042;Name=OE9A004042T1;product=OE9A004042P1
OE9A036345	1176.67	3.40053	0.492657	6.90242	5.11247e-12	2.02904e-10	OE9A036345	ID=OE9A036345T1;Parent=OE9A036345;Name=OE9A036345T1;product=OE9A036345P1;Description=universal stress A;Ontology_term=GO:0006950
OE9A027013	2.93158	3.39937	1.50305	2.26165	0.0237192	0.0680333	OE9A027013	ID=OE9A027013T1;Parent=OE9A027013;Name=OE9A027013T1;product=OE9A027013P1;Description=polygalacturonase-like;Ontology_term=GO:0004650%2C GO:0005576%2C GO:0005982%2C GO:0005985%2C GO:0071555
OE9A118501	1.97823	3.3976	1.56458	2.17157	0.0298879	0.0816085	OE9A118501	ID=OE9A118501T1;Parent=OE9A118501;Name=OE9A118501T1;product=OE9A118501P1
OE9A109237	22.0709	3.39759	0.849945	3.99743	6.40347e-05	0.000462056	OE9A109237	ID=OE9A109237T1;Parent=OE9A109237;Name=OE9A109237T1;product=OE9A109237P1;Description=disease resistance response 206-like;Ontology_term=GO:0009699%2C GO:0042349%2C GO:0050790
OE9A095035	4.29901	3.39667	1.14406	2.96895	0.00298815	0.0124992	OE9A095035	ID=OE9A095035T1;Parent=OE9A095035;Name=OE9A095035T1;product=OE9A095035P1;Description=60S ribosomal L27a-3;Ontology_term=GO:0003735%2C GO:0006412%2C GO:0022625%2C GO:0042254
OE9A038027	17.9912	3.39592	0.579527	5.85981	4.6341e-09	9.42877e-08	OE9A038027	ID=OE9A038027T2;Parent=OE9A038027;Name=OE9A038027T2;product=OE9A038027P2;Description=Ubiquitin-- ligase;Ontology_term=GO:0008270%2C GO:0016020
OE9A019363	4.60372	3.39563	1.21608	2.79227	0.00523392	0.0199276	OE9A019363	ID=OE9A019363T1;Parent=OE9A019363;Name=OE9A019363T1;product=OE9A019363P1
OE9A078957	2.0656	3.39447	1.59934	2.12242	0.0338028	0.0898557	OE9A078957	ID=OE9A078957T1;Parent=OE9A078957;Name=OE9A078957T1;product=OE9A078957P1;Description=B3 domain-containing protein Os03g0120900
OE9A107565	2.68946	3.39416	1.29995	2.611	0.0090278	0.0310571	OE9A107565	ID=OE9A107565T1;Parent=OE9A107565;Name=OE9A107565T1;product=OE9A107565P1;Description=tyrosine--tRNA ligase 1, cytoplasmic;Ontology_term=GO:0000162%2C GO:0004831%2C GO:0005524%2C GO:0006437%2C GO:0006571%2C GO:0009094
OE9A060558	11.0929	3.39363	0.641148	5.29305	1.20295e-07	1.79147e-06	OE9A060558	ID=OE9A060558T1;Parent=OE9A060558;Name=OE9A060558T1;product=OE9A060558P1;Description=DETOXIFICATION 19-like;Ontology_term=GO:0006855%2C GO:0015238%2C GO:0015297%2C GO:0016020
OE9A013637	1.431	3.39211	1.61727	2.09743	0.0359558	0.0942301	OE9A013637	ID=OE9A013637T1;Parent=OE9A013637;Name=OE9A013637T1;product=OE9A013637P1
OE9A067596	1.85456	3.39179	1.49627	2.26684	0.0234	0.0673336	OE9A067596	ID=OE9A067596T1;Parent=OE9A067596;Name=OE9A067596T1;product=OE9A067596P1
OE9A058444	8.68654	3.39044	1.03786	3.26675	0.00108788	0.00534472	OE9A058444	ID=OE9A058444T1;Parent=OE9A058444;Name=OE9A058444T1;product=OE9A058444P1;Description=amino-acid permease BAT1 homolog;Ontology_term=GO:0003333%2C GO:0015171%2C GO:0016021
OE9A037228	246.587	3.3885	0.339837	9.97097	2.04223e-23	6.2728e-21	OE9A037228	ID=OE9A037228T1;Parent=OE9A037228;Name=OE9A037228T1;product=OE9A037228P1;Description=RPM1-interacting 4-like isoform X2;Ontology_term=GO:0002376%2C GO:0009987%2C GO:0016020%2C GO:0050896
OE9A102640	3.10457	3.38589	1.40441	2.4109	0.015913	0.0494048	OE9A102640	ID=OE9A102640T1;Parent=OE9A102640;Name=OE9A102640T1;product=OE9A102640P1;Description=peptidyl-prolyl cis-trans isomerase FKBP62-like;Ontology_term=GO:0000413%2C GO:0003755%2C GO:0005515%2C GO:0005528%2C GO:0005789%2C GO:0061077
OE9A038370	7.77814	3.3854	0.881526	3.84039	0.00012284	0.000817159	OE9A038370	ID=OE9A038370T1;Parent=OE9A038370;Name=OE9A038370T1;product=OE9A038370P1;Description=ankyrin repeat-containing BDA1-like;Ontology_term=GO:0005515%2C GO:0016020
OE9A043393	5.53719	3.38533	1.11494	3.03633	0.00239478	0.0103826	OE9A043393	ID=OE9A043393T1;Parent=OE9A043393;Name=OE9A043393T1;product=OE9A043393P1
OE9pt000035	177.555	3.38484	0.378419	8.9447	3.72975e-19	5.67349e-17	OE9pt000035	ID=OE9pt000035T1;Parent=OE9pt000035;product=OE9pt000035P1;Description=psbJ
OE9A071980	4.37555	3.38374	1.28865	2.6258	0.00864462	0.0300026	OE9A071980	ID=OE9A071980T1;Parent=OE9A071980;Name=OE9A071980T1;product=OE9A071980P1
OE9A067275	5.79389	3.38319	1.21419	2.78638	0.00533001	0.02022	OE9A067275	ID=OE9A067275T1;Parent=OE9A067275;Name=OE9A067275T1;product=OE9A067275P1
OE9A011449	5.50584	3.38165	0.859032	3.93658	8.26503e-05	0.000577467	OE9A011449	ID=OE9A011449T1;Parent=OE9A011449;Name=OE9A011449T1;product=OE9A011449P1;Description=LRR receptor kinase BAK1;Ontology_term=GO:0004672%2C GO:0005524%2C GO:0006468%2C GO:0016020
OE9mt000017	73.5186	3.38094	0.539899	6.26217	3.79659e-10	9.88413e-09	OE9mt000017	ID=OE9mt000017T1;Parent=OE9mt000017;product=OE9mt000017P1;Description=atp4;Name=OE9mt000017T1
OE9A117430	19.647	3.3764	0.770677	4.38108	1.18091e-05	0.000104932	OE9A117430	ID=OE9A117430T1;Parent=OE9A117430;Name=OE9A117430T1;product=OE9A117430P1;Description=ethylene-responsive transcription factor ERF098-like;Ontology_term=GO:0003677%2C GO:0003700%2C GO:0005667%2C GO:0006355%2C GO:0045449
OE9A021511	14.2775	3.37593	0.579512	5.82547	5.69506e-09	1.14058e-07	OE9A021511	ID=OE9A021511T1;Parent=OE9A021511;Name=OE9A021511T1;product=OE9A021511P1;Description=histone H3-like centromeric HTR12;Ontology_term=GO:0000786%2C GO:0003677%2C GO:0005634%2C GO:0007126%2C GO:0046982
OE9A059852	7.17116	3.37268	0.87651	3.84785	0.000119159	0.000795991	OE9A059852	ID=OE9A059852T1;Parent=OE9A059852;Name=OE9A059852T1;product=OE9A059852P1;Description=butyrate-- ligase AAE11, peroxisomal-like;Ontology_term=GO:0008152%2C GO:0016874
OE9A083135	2.64022	3.37019	1.49497	2.25434	0.0241745	0.069023	OE9A083135	ID=OE9A083135T1;Parent=OE9A083135;Name=OE9A083135T1;product=OE9A083135P1;Description=wall-associated receptor kinase 2-like;Ontology_term=GO:0030247
OE9A012316	169.532	3.36953	0.386603	8.71574	2.88874e-18	3.79745e-16	OE9A012316	ID=OE9A012316T1;Parent=OE9A012316;Name=OE9A012316T1;product=OE9A012316P1;Description=random slug 5-like;Ontology_term=GO:0005215%2C GO:0005622%2C GO:0006810
OE9mt000033	8.61777	3.36757	0.817019	4.12178	3.75958e-05	0.000290227	OE9mt000033	ID=OE9mt000033T1;Parent=OE9mt000033;product=OE9mt000033P1;Description=mttB;Name=OE9mt000033T1
OE9A073022	3.17211	3.36631	1.10504	3.04633	0.00231655	0.0100982	OE9A073022	ID=OE9A073022T1;Parent=OE9A073022;Name=OE9A073022T1;product=OE9A073022P1;Description=metal transporter Nramp5-like;Ontology_term=GO:0005215%2C GO:0006810%2C GO:0016021
OE9A038142	2.56595	3.36627	1.60913	2.09198	0.0364401	0.0952026	OE9A038142	ID=OE9A038142T1;Parent=OE9A038142;Name=OE9A038142T1;product=OE9A038142P1;Description=beta-glucosidase-like;Ontology_term=GO:0005975%2C GO:0006952%2C GO:0008422%2C GO:0102483
OE9A022053	268.223	3.36553	0.55657	6.04691	1.47646e-09	3.3521e-08	OE9A022053	ID=OE9A022053T1;Parent=OE9A022053;Name=OE9A022053T1;product=OE9A022053P1;Description=LEAF RUST 10 DISEASE-RESISTANCE LOCUS RECEPTOR-LIKE PROTEIN KINASE-like;Ontology_term=GO:0004672%2C GO:0005524%2C GO:0006468%2C GO:0030247
OE9A074684	4.41733	3.36524	1.13226	2.97214	0.00295735	0.0123911	OE9A074684	ID=OE9A074684T1;Parent=OE9A074684;Name=OE9A074684T1;product=OE9A074684P1;Description=LRR receptor-like serine threonine- kinase GSO1;Ontology_term=GO:0005515
OE9A110934	5.49103	3.36341	1.19624	2.81164	0.00492896	0.0189494	OE9A110934	ID=OE9A110934T1;Parent=OE9A110934;Name=OE9A110934T1;product=OE9A110934P1;Description=NAC domain-containing 94;Ontology_term=GO:0003677%2C GO:0006355
OE9A031223	2.84927	3.36219	1.55944	2.15603	0.0310815	0.0842126	OE9A031223	ID=OE9A031223T1;Parent=OE9A031223;Name=OE9A031223T1;product=OE9A031223P1;Description=condensin complex subunit 1;Ontology_term=GO:0005488%2C GO:0005634%2C GO:0007076%2C GO:0051301
OE9A094711	7.02697	3.36031	0.889361	3.77835	0.000157874	0.00101125	OE9A094711	ID=OE9A094711T1;Parent=OE9A094711;Name=OE9A094711T1;product=OE9A094711P1
OE9A084426	9.49987	3.35853	0.663132	5.06465	4.09157e-07	5.28791e-06	OE9A084426	ID=OE9A084426T1;Parent=OE9A084426;Name=OE9A084426T1;product=OE9A084426P1;Description=serine carboxypeptidase-like 50;Ontology_term=GO:0004185%2C GO:0006508
OE9A007808	2.54137	3.35778	1.61835	2.07482	0.0380033	0.0983297	OE9A007808	ID=OE9A007808T1;Parent=OE9A007808;Name=OE9A007808T1;product=OE9A007808P1;Description=rho guanine nucleotide exchange factor 8-like;Ontology_term=GO:0005089%2C GO:0043547
OE9A018603	5.41102	3.35699	1.06563	3.15023	0.00163141	0.00751135	OE9A018603	ID=OE9A018603T1;Parent=OE9A018603;Name=OE9A018603T1;product=OE9A018603P1;Description=zinc finger STOP1 homolog;Ontology_term=GO:0003676%2C GO:0046872
OE9A000309	8.97193	3.35686	0.939124	3.57445	0.00035096	0.00201312	OE9A000309	ID=OE9A000309T1;Parent=OE9A000309;Name=OE9A000309T1;product=OE9A000309P1
OE9A059183	2.85468	3.35684	1.31871	2.54554	0.0109109	0.0364007	OE9A059183	ID=OE9A059183T1;Parent=OE9A059183;Name=OE9A059183T1;product=OE9A059183P1;Description=Ubiquitin-- ligase;Ontology_term=GO:0005515%2C GO:0008270
OE9A032722	39.8612	3.35539	0.527422	6.36187	1.99312e-10	5.49812e-09	OE9A032722	ID=OE9A032722T1;Parent=OE9A032722;Name=OE9A032722T1;product=OE9A032722P1
OE9A019955	13.0896	3.35308	0.716899	4.6772	2.90821e-06	3.02114e-05	OE9A019955	ID=OE9A019955T1;Parent=OE9A019955;Name=OE9A019955T1;product=OE9A019955P1;Description=casein kinase 1 HD16;Ontology_term=GO:0004674%2C GO:0005524%2C GO:0005634%2C GO:0005737%2C GO:0006897%2C GO:0008360%2C GO:0009069%2C GO:0016055%2C GO:0018105
OE9A086258	7.00198	3.34861	1.07584	3.11256	0.00185474	0.00837423	OE9A086258	ID=OE9A086258T1;Parent=OE9A086258;Name=OE9A086258T1;product=OE9A086258P1
OE9A100135	12.3431	3.34655	0.76041	4.40097	1.07766e-05	9.68075e-05	OE9A100135	ID=OE9A100135T1;Parent=OE9A100135;Name=OE9A100135T1;product=OE9A100135P1;Description=WUSCHEL-related homeobox 1-like;Ontology_term=GO:0003677
OE9A115938	3.24153	3.34612	1.1991	2.79052	0.00526239	0.0200145	OE9A115938	ID=OE9A115938T1;Parent=OE9A115938;Name=OE9A115938T1;product=OE9A115938P1
OE9A055836	86.9942	3.3448	0.853234	3.92014	8.84973e-05	0.000612957	OE9A055836	ID=OE9A055836T1;Parent=OE9A055836;Name=OE9A055836T1;product=OE9A055836P1;Description=late embryogenesis abundant At1g64065-like;Ontology_term=GO:0016020
OE9A051691	7.27009	3.34434	0.893737	3.74197	0.000182582	0.00114699	OE9A051691	ID=OE9A051691T1;Parent=OE9A051691;Name=OE9A051691T1;product=OE9A051691P1;Description=;Ontology_term=GO:0016757
OE9A032336	248.352	3.34247	0.633737	5.27421	1.33326e-07	1.96266e-06	OE9A032336	ID=OE9A032336T1;Parent=OE9A032336;Name=OE9A032336T1;product=OE9A032336P1;Description=MLO 6;Ontology_term=GO:0005516%2C GO:0006952%2C GO:0009607%2C GO:0016021
OE9A082567	3.45792	3.34213	1.25417	2.66482	0.00770298	0.0273526	OE9A082567	ID=OE9A082567T1;Parent=OE9A082567;Name=OE9A082567T1;product=OE9A082567P1;Description=transcription factor RAX2-like;Ontology_term=GO:0003677
OE9A063173	3.51886	3.34178	1.42405	2.34667	0.0189421	0.0568441	OE9A063173	ID=OE9A063173T1;Parent=OE9A063173;Name=OE9A063173T1;product=OE9A063173P1;Description=serine carboxypeptidase-like 27;Ontology_term=GO:0004185%2C GO:0005773%2C GO:0051603
OE9A078658	5.7199	3.34062	0.848306	3.93799	8.21686e-05	0.000574479	OE9A078658	ID=OE9A078658T1;Parent=OE9A078658;Name=OE9A078658T1;product=OE9A078658P1;Description=precursor of CEP16-like;Ontology_term=GO:0016020
OE9A042096	10.7404	3.33782	1.02415	3.25912	0.00111759	0.00547238	OE9A042096	ID=OE9A042096T1;Parent=OE9A042096;Name=OE9A042096T1;product=OE9A042096P1;Description=gamma-glutamyl peptidase 5-like;Ontology_term=GO:0005829%2C GO:0006508%2C GO:0006541%2C GO:0008233%2C GO:0016740%2C GO:0019760
OE9A006867	2.58004	3.33773	1.48466	2.24815	0.0245666	0.0698741	OE9A006867	ID=OE9A006867T1;Parent=OE9A006867;Name=OE9A006867T1;product=OE9A006867P1;Description=pyridoxal 5 -phosphate synthase-like subunit;Ontology_term=GO:0003824%2C GO:0005829%2C GO:0042819%2C GO:0042823%2C GO:0046982
OE9A112326	10.5941	3.33135	0.91015	3.66022	0.000251997	0.00151568	OE9A112326	ID=OE9A112326T1;Parent=OE9A112326;Name=OE9A112326T1;product=OE9A112326P1;Description=ABC transporter B family member 15-like;Ontology_term=GO:0005524%2C GO:0016021%2C GO:0042626%2C GO:0055085
OE9A007828	6.14293	3.32924	0.869329	3.82967	0.000128315	0.000848109	OE9A007828	ID=OE9A007828T1;Parent=OE9A007828;Name=OE9A007828T1;product=OE9A007828P1
OE9A082714	2.5451	3.32825	1.37531	2.41999	0.0155208	0.0484591	OE9A082714	ID=OE9A082714T1;Parent=OE9A082714;Name=OE9A082714T1;product=OE9A082714P1;Description=NETWORKED 4B;Ontology_term=GO:0003779
OE9A107211	12.5328	3.32698	0.644541	5.16178	2.44617e-07	3.35367e-06	OE9A107211	ID=OE9A107211T1;Parent=OE9A107211;Name=OE9A107211T1;product=OE9A107211P1
OE9A096612	5.97254	3.3247	0.930059	3.57473	0.000350596	0.00201175	OE9A096612	ID=OE9A096612T1;Parent=OE9A096612;Name=OE9A096612T1;product=OE9A096612P1;Description=S-type anion channel SLAH4-like;Ontology_term=GO:0016021%2C GO:0055085
OE9A070230	41.1956	3.32451	0.715537	4.64617	3.38147e-06	3.45215e-05	OE9A070230	ID=OE9A070230T1;Parent=OE9A070230;Name=OE9A070230T1;product=OE9A070230P1;Description=bifunctional aspartate aminotransferase and glutamate aspartate-prephenate aminotransferase;Ontology_term=GO:0000162%2C GO:0004069%2C GO:0006107%2C GO:0006522%2C GO:0006525%2C GO:0006531%2C GO:0006534%2C GO:0006536%2C GO:0006560%2C GO:0006571%2C GO:0009094%2C GO:0009507%2C GO:0009821%2C GO:0015976%2C GO:0030170%2…
OE9A080392	4.22947	3.32448	0.824663	4.03132	5.54647e-05	0.000407021	OE9A080392	ID=OE9A080392T1;Parent=OE9A080392;Name=OE9A080392T1;product=OE9A080392P1;Description=aluminum-activated malate transporter 9-like;Ontology_term=GO:0009705%2C GO:0015140%2C GO:0015743
OE9A117417	4.39982	3.32381	0.964218	3.44715	0.000566526	0.00304102	OE9A117417	ID=OE9A117417T1;Parent=OE9A117417;Name=OE9A117417T1;product=OE9A117417P1
OE9A109937	7.36953	3.32161	0.90737	3.6607	0.00025153	0.00151316	OE9A109937	ID=OE9A109937T1;Parent=OE9A109937;Name=OE9A109937T1;product=OE9A109937P1;Description=nucleic acid binding;Ontology_term=GO:0003950%2C GO:0046872
OE9mt000004	47.424	3.31773	0.526801	6.29788	3.01749e-10	7.99924e-09	OE9mt000004	ID=OE9mt000004T1;Parent=OE9mt000004;product=OE9mt000004P1;Description=nad2;Name=OE9mt000004T1
OE9A110486	58.0781	3.31606	0.830064	3.99495	6.47083e-05	0.000466401	OE9A110486	ID=OE9A110486T1;Parent=OE9A110486;Name=OE9A110486T1;product=OE9A110486P1;Description=crocetin glucosyltransferase, chloroplastic-like;Ontology_term=GO:0008152%2C GO:0016758
OE9A094691	778.011	3.31568	0.652101	5.08461	3.68376e-07	4.8227e-06	OE9A094691	ID=OE9A094691T1;Parent=OE9A094691;Name=OE9A094691T1;product=OE9A094691P1;Description=premnaspirodiene oxygenase-like;Ontology_term=GO:0005506%2C GO:0016020%2C GO:0016705%2C GO:0020037%2C GO:0055114
OE9A020454	12.8582	3.3137	0.563564	5.8799	4.10519e-09	8.45493e-08	OE9A020454	ID=OE9A020454T1;Parent=OE9A020454;Name=OE9A020454T1;product=OE9A020454P1;Description=metal tolerance 1-like isoform X2;Ontology_term=GO:0008324%2C GO:0016021%2C GO:0098655
OE9A100766	1.77188	3.31098	1.39157	2.3793	0.0173454	0.0529521	OE9A100766	ID=OE9A100766T1;Parent=OE9A100766;Name=OE9A100766T1;product=OE9A100766P1;Description=exocyst complex component EXO70A1-like;Ontology_term=GO:0000145%2C GO:0006887
OE9A080310	19.5735	3.30987	0.719121	4.60266	4.17133e-06	4.16621e-05	OE9A080310	ID=OE9A080310T1;Parent=OE9A080310;Name=OE9A080310T1;product=OE9A080310P1;Description=patatin 2;Ontology_term=GO:0004620%2C GO:0005737%2C GO:0009395%2C GO:0016020%2C GO:0046486%2C GO:0047372
OE9A009890	4.99744	3.30945	1.20515	2.74609	0.00603103	0.0223535	OE9A009890	ID=OE9A009890T1;Parent=OE9A009890;Name=OE9A009890T1;product=OE9A009890P1;Description=glutathione gamma-glutamylcysteinyltransferase 1-like isoform X2;Ontology_term=GO:0010038%2C GO:0016756%2C GO:0046872%2C GO:0046938
OE9A028668	7.58034	3.3071	0.801605	4.1256	3.69773e-05	0.000286079	OE9A028668	ID=OE9A028668T1;Parent=OE9A028668;Name=OE9A028668T1;product=OE9A028668P1;Description=amino acid permease 3-like;Ontology_term=GO:0016021
OE9A118703	15.3395	3.30678	0.700389	4.72134	2.34295e-06	2.48732e-05	OE9A118703	ID=OE9A118703T1;Parent=OE9A118703;Name=OE9A118703T1;product=OE9A118703P1;Description=receptor 12;Ontology_term=GO:0005515%2C GO:0016020
OE9A062231	6.66145	3.30579	0.901426	3.66729	0.000245134	0.00148138	OE9A062231	ID=OE9A062231T1;Parent=OE9A062231;Name=OE9A062231T1;product=OE9A062231P1
OE9A001125	3.95467	3.30496	1.48083	2.23184	0.0256257	0.072319	OE9A001125	ID=OE9A001125T1;Parent=OE9A001125;Name=OE9A001125T1;product=OE9A001125P1;Description=cannabidiolic acid synthase-like;Ontology_term=GO:0016614%2C GO:0050660%2C GO:0055114
OE9A110255	1.81307	3.30328	1.56351	2.11274	0.0346229	0.0916075	OE9A110255	ID=OE9A110255T1;Parent=OE9A110255;Name=OE9A110255T1;product=OE9A110255P1;Description=cation H(+) antiporter 18-like;Ontology_term=GO:0005451%2C GO:0006885%2C GO:0012505%2C GO:0016021%2C GO:1902600
OE9A055391	2.919	3.30264	1.40694	2.34739	0.0189054	0.0567749	OE9A055391	ID=OE9A055391T1;Parent=OE9A055391;Name=OE9A055391T1;product=OE9A055391P1
OE9mt000022	16.5465	3.30196	0.768895	4.29442	1.75149e-05	0.000148407	OE9mt000022	ID=OE9mt000022T1;Parent=OE9mt000022;product=OE9mt000022P1;Description=ccmC;Name=OE9mt000022T1
OE9A006172	6.48433	3.29889	1.13283	2.91209	0.00359024	0.0146023	OE9A006172	ID=OE9A006172T1;Parent=OE9A006172;Name=OE9A006172T1;product=OE9A006172P1;Description=major allergen Pru ar 1;Ontology_term=GO:0004864%2C GO:0004872%2C GO:0005634%2C GO:0005737%2C GO:0006952%2C GO:0009607%2C GO:0009738%2C GO:0010427%2C GO:0043086%2C GO:0080163
OE9A010940	3.2659	3.29748	1.56258	2.11029	0.0348338	0.0920221	OE9A010940	ID=OE9A010940T1;Parent=OE9A010940;Name=OE9A010940T1;product=OE9A010940P1;Description=tetratricopeptide repeat 1-like;Ontology_term=GO:0005515%2C GO:0016020
OE9A049615	7.43452	3.29679	0.914496	3.60503	0.000312116	0.00182105	OE9A049615	ID=OE9A049615T1;Parent=OE9A049615;Name=OE9A049615T1;product=OE9A049615P1;Description=probable plastidic glucose transporter 1;Ontology_term=GO:0016021%2C GO:0022857%2C GO:0055085
OE9pt000051	277.952	3.29599	0.30303	10.8768	1.48732e-27	9.69612e-25	OE9pt000051	ID=OE9pt000051T1;Parent=OE9pt000051;product=OE9pt000051P1;Description=petD
OE9A058350	131.888	3.29319	0.248415	13.2568	4.11902e-40	1.46198e-36	OE9A058350	ID=OE9A058350T1;Parent=OE9A058350;Name=OE9A058350T1;product=OE9A058350P1;Description=cysteine-rich receptor kinase 2;Ontology_term=GO:0004674%2C GO:0005524%2C GO:0005886%2C GO:0006952%2C GO:0009069%2C GO:0009506%2C GO:0016021%2C GO:0046777
OE9A058685	3.19393	3.29255	1.17381	2.805	0.00503169	0.0192724	OE9A058685	ID=OE9A058685T1;Parent=OE9A058685;Name=OE9A058685T1;product=OE9A058685P1;Description=heat shock factor-binding 1-like;Ontology_term=GO:0003714%2C GO:0005667%2C GO:0016481
OE9A005051	2.00066	3.2924	1.501	2.19347	0.0282734	0.0782028	OE9A005051	ID=OE9A005051T1;Parent=OE9A005051;Name=OE9A005051T1;product=OE9A005051P1;Description=FT-interacting 1-like;Ontology_term=GO:0005509%2C GO:0005515%2C GO:0005544%2C GO:0005886%2C GO:0016021
OE9A114451	197.052	3.29146	0.514339	6.3994	1.55992e-10	4.37107e-09	OE9A114451	ID=OE9A114451T1;Parent=OE9A114451;Name=OE9A114451T1;product=OE9A114451P1;Description=probable receptor kinase At1g67000;Ontology_term=GO:0004672%2C GO:0005524%2C GO:0006468%2C GO:0030247
OE9pt000077	60.5473	3.29097	0.393948	8.35382	6.60886e-17	7.15639e-15	OE9pt000077	ID=OE9pt000077T1;Parent=OE9pt000077;product=OE9pt000077P1;Description=ndhH
OE9A062173	9.23689	3.28583	0.723956	4.53871	5.65991e-06	5.45235e-05	OE9A062173	ID=OE9A062173T1;Parent=OE9A062173;Name=OE9A062173T1;product=OE9A062173P1;Description=ras-related RABA5a-like;Ontology_term=GO:0005525%2C GO:0005622%2C GO:0007264
OE9A040907	9.14283	3.27942	1.00701	3.25658	0.00112762	0.00551448	OE9A040907	ID=OE9A040907T1;Parent=OE9A040907;Name=OE9A040907T1;product=OE9A040907P1
OE9A119985	5.97198	3.27852	0.942769	3.47755	0.000506022	0.00275889	OE9A119985	ID=OE9A119985T1;Parent=OE9A119985;Name=OE9A119985T1;product=OE9A119985P1;Description=ankyrin repeat-containing At5g02620-like;Ontology_term=GO:0005515
OE9A091075	1.7888	3.27632	1.30874	2.50342	0.0122999	0.0401203	OE9A091075	ID=OE9A091075T1;Parent=OE9A091075;Name=OE9A091075T1;product=OE9A091075P1;Description=peptidyl-prolyl cis-trans isomerase CYP19-3;Ontology_term=GO:0000413%2C GO:0003755%2C GO:0005739%2C GO:0005794%2C GO:0006457
OE9A110614	4.459	3.27594	1.10191	2.97296	0.00294945	0.0123672	OE9A110614	ID=OE9A110614T1;Parent=OE9A110614;Name=OE9A110614T1;product=OE9A110614P1;Description=peroxidase 3-like;Ontology_term=GO:0004601%2C GO:0005576%2C GO:0006804%2C GO:0006979%2C GO:0020037%2C GO:0042744%2C GO:0046872%2C GO:0055114%2C GO:0098869
OE9A085188	3.48701	3.27572	1.02737	3.18843	0.00143046	0.00673966	OE9A085188	ID=OE9A085188T1;Parent=OE9A085188;Name=OE9A085188T1;product=OE9A085188P1
OE9A095511	110.848	3.27526	0.560315	5.84539	5.05383e-09	1.02242e-07	OE9A095511	ID=OE9A095511T1;Parent=OE9A095511;Name=OE9A095511T1;product=OE9A095511P1;Description=CASP 1;Ontology_term=GO:0005886%2C GO:0016021
OE9A068204	12.2742	3.27395	0.824167	3.97244	7.11409e-05	0.000507034	OE9A068204	ID=OE9A068204T1;Parent=OE9A068204;Name=OE9A068204T1;product=OE9A068204P1;Description=CASP PIMP1;Ontology_term=GO:0002229%2C GO:0009409%2C GO:0009611%2C GO:0009651%2C GO:0009723%2C GO:0009737%2C GO:0009751%2C GO:0009753%2C GO:0016020%2C GO:0042742
OE9A052260	22.8351	3.27338	0.917405	3.56809	0.000359593	0.00205379	OE9A052260	ID=OE9A052260T1;Parent=OE9A052260;Name=OE9A052260T1;product=OE9A052260P1;Description=transmembrane 45A-like;Ontology_term=GO:0016021
OE9A100418	4.91949	3.27263	1.23362	2.65286	0.00798125	0.0281289	OE9A100418	ID=OE9A100418T1;Parent=OE9A100418;Name=OE9A100418T1;product=OE9A100418P1;Description=receptor kinase At5g39000 isoform X2;Ontology_term=GO:0004674%2C GO:0005524%2C GO:0006468%2C GO:0009069
OE9A095359	3.15128	3.27236	1.0922	2.99612	0.00273435	0.0116291	OE9A095359	ID=OE9A095359T1;Parent=OE9A095359;Name=OE9A095359T1;product=OE9A095359P1;Description=AP2-like ethylene-responsive transcription factor At1g16060;Ontology_term=GO:0003677%2C GO:0003700%2C GO:0005634%2C GO:0005667%2C GO:0006355%2C GO:0007275%2C GO:0045449
OE9A029008	12.0311	3.27216	0.716802	4.56494	4.99631e-06	4.87334e-05	OE9A029008	ID=OE9A029008T1;Parent=OE9A029008;Name=OE9A029008T1;product=OE9A029008P1
OE9A048746	264.203	3.27205	0.44335	7.38029	1.5795e-13	8.55181e-12	OE9A048746	ID=OE9A048746T1;Parent=OE9A048746;Name=OE9A048746T1;product=OE9A048746P1;Description=transcription factor bHLH128-like isoform X2;Ontology_term=GO:0001046%2C GO:0001228%2C GO:0005634%2C GO:0006366%2C GO:0046983
OE9A074347	7.11921	3.27142	0.895103	3.6548	0.000257387	0.00154143	OE9A074347	ID=OE9A074347T1;Parent=OE9A074347;Name=OE9A074347T1;product=OE9A074347P1
OE9A044234	41.8717	3.27121	0.564601	5.79384	6.87962e-09	1.35489e-07	OE9A044234	ID=OE9A044234T1;Parent=OE9A044234;Name=OE9A044234T1;product=OE9A044234P1
OE9A005830	1.33738	3.27102	1.48669	2.20021	0.0277922	0.0771592	OE9A005830	ID=OE9A005830T1;Parent=OE9A005830;Name=OE9A005830T1;product=OE9A005830P1;Description=Antitermination domain-containing isoform 2;Ontology_term=GO:0003723%2C GO:0006353%2C GO:0006355%2C GO:0009507
OE9A012050	6.76182	3.27101	0.920087	3.5551	0.00037783	0.00214529	OE9A012050	ID=OE9A012050T1;Parent=OE9A012050;Name=OE9A012050T1;product=OE9A012050P1;Description=NUCLEAR FUSION DEFECTIVE 4-like;Ontology_term=GO:0016021%2C GO:0055085
OE9A029490	9.11816	3.26843	0.802431	4.07316	4.63795e-05	0.000348026	OE9A029490	ID=OE9A029490T1;Parent=OE9A029490;Name=OE9A029490T1;product=OE9A029490P1;Description=agamous-like MADS-box AGL15;Ontology_term=GO:0003677%2C GO:0003700%2C GO:0005634%2C GO:0005667%2C GO:0006355%2C GO:0045449%2C GO:0046983
OE9A016525	3.43458	3.26834	1.177	2.77683	0.00548916	0.0206966	OE9A016525	ID=OE9A016525T1;Parent=OE9A016525;Name=OE9A016525T1;product=OE9A016525P1;Description=metalloendo ase 2-MMP-like;Ontology_term=GO:0004222%2C GO:0006508%2C GO:0008270%2C GO:0016020%2C GO:0031012
OE9A042238	8.14363	3.26424	1.10824	2.94543	0.0032251	0.0133501	OE9A042238	ID=OE9A042238T1;Parent=OE9A042238;Name=OE9A042238T1;product=OE9A042238P1;Description=G-type lectin S-receptor-like serine threonine- kinase RLK1;Ontology_term=GO:0004674%2C GO:0005524%2C GO:0006468%2C GO:0009069%2C GO:0016021
OE9mt000001	224.333	3.26088	0.402998	8.09155	5.8911e-16	5.31597e-14	OE9mt000001	ID=OE9mt000001T1;Parent=OE9mt000001;product=OE9mt000001P1;Description=nad5;Name=OE9mt000001T1
OE9A023969	26348	3.26049	0.502687	6.48612	8.80738e-11	2.61228e-09	OE9A023969	ID=OE9A023969T1;Parent=OE9A023969;Name=OE9A023969T1;product=OE9A023969P1
OE9A056915	6.73394	3.25985	0.967086	3.37079	0.000749526	0.0038862	OE9A056915	ID=OE9A056915T1;Parent=OE9A056915;Name=OE9A056915T1;product=OE9A056915P1;Description=transmembrane ,;Ontology_term=GO:0005886%2C GO:0016021
OE9pt000069	110.043	3.25913	0.405882	8.02974	9.76761e-16	8.41015e-14	OE9pt000069	ID=OE9pt000069T1;Parent=OE9pt000069;product=OE9pt000069P1;Description=rpl32
OE9A116031	5.26665	3.25771	1.02296	3.18459	0.0014496	0.00681674	OE9A116031	ID=OE9A116031T2;Parent=OE9A116031;Name=OE9A116031T2;product=OE9A116031P2;Description=KH domain-containing At4g18375 isoform X1;Ontology_term=GO:0003723
OE9A117715	22.1615	3.25475	0.693461	4.69348	2.68592e-06	2.80756e-05	OE9A117715	ID=OE9A117715T1;Parent=OE9A117715;Name=OE9A117715T1;product=OE9A117715P1;Description=cellulose synthase G3;Ontology_term=GO:0005982%2C GO:0005985%2C GO:0006011%2C GO:0016021%2C GO:0016760%2C GO:0030244%2C GO:0071555
OE9A095722	1.8832	3.25464	1.51286	2.15132	0.0314513	0.0849769	OE9A095722	ID=OE9A095722T1;Parent=OE9A095722;Name=OE9A095722T1;product=OE9A095722P1
OE9A015049	3.66126	3.25197	1.5291	2.12672	0.0334437	0.089146	OE9A015049	ID=OE9A015049T1;Parent=OE9A015049;Name=OE9A015049T1;product=OE9A015049P1;Description=Kinase superfamily isoform 1;Ontology_term=GO:0016301%2C GO:0016310
OE9A057578	33.1975	3.25062	0.614275	5.29179	1.21122e-07	1.80294e-06	OE9A057578	ID=OE9A057578T1;Parent=OE9A057578;Name=OE9A057578T1;product=OE9A057578P1;Description=Serine threonine kinase;Ontology_term=GO:0004674%2C GO:0005509%2C GO:0005515%2C GO:0005524%2C GO:0006468%2C GO:0009069%2C GO:0016021%2C GO:0030247
OE9A003204	3.73054	3.24978	1.12973	2.8766	0.00401985	0.0159873	OE9A003204	ID=OE9A003204T1;Parent=OE9A003204;Name=OE9A003204T1;product=OE9A003204P1;Description=transcription factor MYB106-like;Ontology_term=GO:0003677
OE9A044056	235.158	3.24596	0.352661	9.20419	3.44247e-20	6.10923e-18	OE9A044056	ID=OE9A044056T3;Parent=OE9A044056;Name=OE9A044056T3;product=OE9A044056P3;Description=G-type lectin S-receptor-like serine threonine- kinase At1g11300;Ontology_term=GO:0004674%2C GO:0005515%2C GO:0005524%2C GO:0006468%2C GO:0009069%2C GO:0016021%2C GO:0048544
OE9A013248	157.698	3.24143	0.397539	8.15375	3.52806e-16	3.27033e-14	OE9A013248	ID=OE9A013248T1;Parent=OE9A013248;Name=OE9A013248T1;product=OE9A013248P1;Description=rust resistance kinase Lr10-like;Ontology_term=GO:0004672%2C GO:0005524%2C GO:0006468%2C GO:0016020
OE9A055395	180.252	3.24065	0.373196	8.68352	3.83695e-18	4.9224e-16	OE9A055395	ID=OE9A055395T1;Parent=OE9A055395;Name=OE9A055395T1;product=OE9A055395P1;Description=endoglucanase 12;Ontology_term=GO:0005982%2C GO:0005985%2C GO:0008810%2C GO:0016021%2C GO:0030245
OE9A083368	1.21048	3.23862	1.52884	2.11835	0.0341455	0.0905946	OE9A083368	ID=OE9A083368T1;Parent=OE9A083368;Name=OE9A083368T1;product=OE9A083368P1
OE9A003898	2.80408	3.23851	1.47851	2.19038	0.0284966	0.0786772	OE9A003898	ID=OE9A003898T1;Parent=OE9A003898;Name=OE9A003898T1;product=OE9A003898P1
OE9A042352	2.75025	3.23702	1.31662	2.45859	0.0139484	0.044397	OE9A042352	ID=OE9A042352T1;Parent=OE9A042352;Name=OE9A042352T1;product=OE9A042352P1;Description=uncharacterized protein LOC111408230;Ontology_term=GO:0005515
OE9A103366	173.657	3.23576	0.2825	11.454	2.24543e-30	2.2415e-27	OE9A103366	ID=OE9A103366T1;Parent=OE9A103366;Name=OE9A103366T1;product=OE9A103366P1;Description=late blight resistance homolog R1A-10;Ontology_term=GO:0043531
OE9A088155	3.25583	3.23442	1.37315	2.35548	0.0184988	0.055732	OE9A088155	ID=OE9A088155T1;Parent=OE9A088155;Name=OE9A088155T1;product=OE9A088155P1;Description=B3 domain-containing transcription factor VRN1-like;Ontology_term=GO:0003677
OE9A076353	2.88359	3.23111	1.14141	2.83081	0.00464308	0.0180608	OE9A076353	ID=OE9A076353T1;Parent=OE9A076353;Name=OE9A076353T1;product=OE9A076353P1;Description=probable pectinesterase pectinesterase inhibitor 46;Ontology_term=GO:0004857%2C GO:0005618%2C GO:0005982%2C GO:0005985%2C GO:0030599%2C GO:0042545
OE9A078298	896.849	3.23106	0.279073	11.5778	5.33801e-31	5.87991e-28	OE9A078298	ID=OE9A078298T1;Parent=OE9A078298;Name=OE9A078298T1;product=OE9A078298P1;Description=GABA transporter 1-like;Ontology_term=GO:0005886%2C GO:0015185%2C GO:0015812%2C GO:0016021
OE9A048563	2.28534	3.23082	1.30908	2.46801	0.0135865	0.0434745	OE9A048563	ID=OE9A048563T1;Parent=OE9A048563;Name=OE9A048563T1;product=OE9A048563P1;Description=homeobox-leucine zipper HDG11-like;Ontology_term=GO:0005634%2C GO:0006355%2C GO:0008289%2C GO:0043565
OE9A051613	20.0614	3.22963	1.00918	3.20025	0.00137311	0.00650973	OE9A051613	ID=OE9A051613T1;Parent=OE9A051613;Name=OE9A051613T1;product=OE9A051613P1;Description=beta-amyrin 28-oxidase-like;Ontology_term=GO:0004497%2C GO:0005506%2C GO:0016021%2C GO:0016705%2C GO:0020037%2C GO:0055114
OE9A026236	102.243	3.22752	0.430238	7.50171	6.29926e-14	3.71947e-12	OE9A026236	ID=OE9A026236T1;Parent=OE9A026236;Name=OE9A026236T1;product=OE9A026236P1;Description=rust resistance kinase Lr10-like;Ontology_term=GO:0004672%2C GO:0005524%2C GO:0006468%2C GO:0030247
OE9A018773	3.91386	3.22679	1.08227	2.98151	0.00286831	0.0120962	OE9A018773	ID=OE9A018773T1;Parent=OE9A018773;Name=OE9A018773T1;product=OE9A018773P1;Description=F-box PP2-B15-like;Ontology_term=GO:0005515
OE9A003243	5.80967	3.2252	0.909013	3.54802	0.00038814	0.00219602	OE9A003243	ID=OE9A003243T1;Parent=OE9A003243;Name=OE9A003243T1;product=OE9A003243P1
OE9A005416	6.24582	3.22454	1.17615	2.7416	0.00611407	0.0226051	OE9A005416	ID=OE9A005416T1;Parent=OE9A005416;Name=OE9A005416T1;product=OE9A005416P1
OE9A043228	3.08979	3.22319	1.33039	2.42273	0.0154042	0.0481479	OE9A043228	ID=OE9A043228T1;Parent=OE9A043228;Name=OE9A043228T1;product=OE9A043228P1;Description=NRT1 PTR FAMILY -like;Ontology_term=GO:0005215%2C GO:0006857%2C GO:0016021
OE9A103256	19.9763	3.22291	0.725732	4.44091	8.95796e-06	8.19688e-05	OE9A103256	ID=OE9A103256T1;Parent=OE9A103256;Name=OE9A103256T1;product=OE9A103256P1;Description=premnaspirodiene oxygenase-like;Ontology_term=GO:0004497%2C GO:0005506%2C GO:0016021%2C GO:0016705%2C GO:0020037%2C GO:0055114
OE9D000511	5.17383	3.22137	0.935	3.44531	0.000570402	0.00305536	OE9D000511	ID=OE9D000511T1;Parent=OE9D000511;product=OE9D000511P1;Description=mitochondrial import inner membrane translocase subunit Tim13;Ontology_term=GO:0005507%2C GO:0005758%2C GO:0015031;
OE9A114708	72.3139	3.21802	0.453059	7.10288	1.22187e-12	5.45893e-11	OE9A114708	ID=OE9A114708T1;Parent=OE9A114708;Name=OE9A114708T1;product=OE9A114708P1;Description=G-type lectin S-receptor-like serine threonine- kinase At4g27290 isoform X2;Ontology_term=GO:0004672%2C GO:0005524%2C GO:0006468%2C GO:0016020%2C GO:0048544
OE9A047907	3.07862	3.21721	1.02992	3.12374	0.00178568	0.00812097	OE9A047907	ID=OE9A047907T1;Parent=OE9A047907;Name=OE9A047907T1;product=OE9A047907P1
OE9A055071	2.90387	3.21667	1.43202	2.24624	0.0246887	0.0701465	OE9A055071	ID=OE9A055071T1;Parent=OE9A055071;Name=OE9A055071T1;product=OE9A055071P1;Description=4-coumarate-- ligase-like 7;Ontology_term=GO:0008152%2C GO:0016020%2C GO:0016491
OE9pt000013	60.476	3.21542	0.565744	5.68352	1.31947e-08	2.46198e-07	OE9pt000013	ID=OE9pt000013T1;Parent=OE9pt000013;product=OE9pt000013P1;Description=rpoB
OE9A117976	7.16075	3.2131	0.774675	4.14768	3.35869e-05	0.000262708	OE9A117976	ID=OE9A117976T2;Parent=OE9A117976;Name=OE9A117976T2;product=OE9A117976P2;Description=insulin-degrading enzyme-like 1, peroxisomal;Ontology_term=GO:0004222%2C GO:0005739%2C GO:0008270%2C GO:0016021%2C GO:0016485%2C GO:0043171%2C GO:0051603
OE9A078529	3.03633	3.21273	1.20082	2.67545	0.00746282	0.0266837	OE9A078529	ID=OE9A078529T1;Parent=OE9A078529;Name=OE9A078529T1;product=OE9A078529P1;Description=heat shock 83;Ontology_term=GO:0005524%2C GO:0006457%2C GO:0006950%2C GO:0051082
OE9A032622	7.23512	3.21166	1.46035	2.19924	0.0278611	0.0772968	OE9A032622	ID=OE9A032622T1;Parent=OE9A032622;Name=OE9A032622T1;product=OE9A032622P1;Description=lon protease homolog 2, peroxisomal-like isoform X1;Ontology_term=GO:0004176%2C GO:0004252%2C GO:0005524%2C GO:0005782%2C GO:0006510%2C GO:0006515%2C GO:0016485%2C GO:0016558
OE9A071579	236.02	3.21127	0.292406	10.9822	4.65415e-28	3.30383e-25	OE9A071579	ID=OE9A071579T1;Parent=OE9A071579;Name=OE9A071579T1;product=OE9A071579P1;Description=serine threonine phosphatase 2A 57 kDa regulatory subunit B theta isoform-like;Ontology_term=GO:0000159%2C GO:0005488%2C GO:0007165%2C GO:0034047
OE9A074264	3.23188	3.21116	1.4135	2.27178	0.0230996	0.0666389	OE9A074264	ID=OE9A074264T1;Parent=OE9A074264;Name=OE9A074264T1;product=OE9A074264P1;Description=probable hexokinase-like 2;Ontology_term=GO:0001678%2C GO:0004340%2C GO:0005524%2C GO:0005536%2C GO:0005739%2C GO:0005829%2C GO:0005982%2C GO:0005985%2C GO:0006000%2C GO:0006012%2C GO:0006013%2C GO:0006094%2C GO:0006096%2C GO:0008865%2C GO:0016021%2C GO:0019158%2C GO:0019872%2C GO:0046835
OE9A100987	15.4886	3.2108	1.39923	2.29469	0.0217508	0.0635354	OE9A100987	ID=OE9A100987T1;Parent=OE9A100987;Name=OE9A100987T1;product=OE9A100987P1;Description=isoprene synthase;Ontology_term=GO:0000287%2C GO:0006950%2C GO:0009266%2C GO:0009536%2C GO:0010333%2C GO:0044255%2C GO:0071482
OE9A094198	61.0822	3.21043	0.436459	7.35563	1.9003e-13	1.00502e-11	OE9A094198	ID=OE9A094198T1;Parent=OE9A094198;Name=OE9A094198T1;product=OE9A094198P1;Description=cytokinin dehydrogenase 5;Ontology_term=GO:0009690%2C GO:0016614%2C GO:0019139%2C GO:0050660%2C GO:0055114
OE9A089998	1.21429	3.20973	1.47572	2.17503	0.0296277	0.0811062	OE9A089998	ID=OE9A089998T2;Parent=OE9A089998;Name=OE9A089998T2;product=OE9A089998P2;Description=GIGANTEA-like isoform X1;Ontology_term=GO:2000028
OE9A052962	13.1919	3.20909	0.769282	4.17154	3.02553e-05	0.00023982	OE9A052962	ID=OE9A052962T1;Parent=OE9A052962;Name=OE9A052962T1;product=OE9A052962P1;Description=probable trehalose-phosphate phosphatase F;Ontology_term=GO:0004805%2C GO:0005982%2C GO:0005985%2C GO:0005992%2C GO:0016311
OE9A036186	8.12443	3.20718	0.806662	3.97586	7.01244e-05	0.000500658	OE9A036186	ID=OE9A036186T1;Parent=OE9A036186;Name=OE9A036186T1;product=OE9A036186P1;Description=ankyrin repeat-containing BDA1-like;Ontology_term=GO:0005515
OE9mt000038	23.4937	3.20638	0.663955	4.82922	1.37071e-06	1.54667e-05	OE9mt000038	ID=OE9mt000038T1;Parent=OE9mt000038;product=OE9mt000038P1;Description=nad6;Name=OE9mt000038T1
OE9A043562	50.9	3.20627	0.63886	5.01874	5.20108e-07	6.50258e-06	OE9A043562	ID=OE9A043562T1;Parent=OE9A043562;Name=OE9A043562T1;product=OE9A043562P1;Description=premnaspirodiene oxygenase-like;Ontology_term=GO:0005506%2C GO:0016020%2C GO:0016705%2C GO:0020037%2C GO:0055114
OE9A028825	23.1087	3.20485	0.539192	5.94381	2.78466e-09	5.93417e-08	OE9A028825	ID=OE9A028825T1;Parent=OE9A028825;Name=OE9A028825T1;product=OE9A028825P1
OE9A024781	62.0122	3.20303	0.476283	6.72506	1.75524e-11	6.10113e-10	OE9A024781	ID=OE9A024781T1;Parent=OE9A024781;Name=OE9A024781T1;product=OE9A024781P1;Description=glyoxylate hydroxypyruvate reductase HPR3-like;Ontology_term=GO:0016616%2C GO:0051287%2C GO:0055114
OE9A021131	1.56708	3.20242	1.49989	2.13511	0.0327521	0.0876315	OE9A021131	ID=OE9A021131T1;Parent=OE9A021131;Name=OE9A021131T1;product=OE9A021131P1
OE9A103882	31.3104	3.20193	0.432431	7.40449	1.3166e-13	7.22636e-12	OE9A103882	ID=OE9A103882T1;Parent=OE9A103882;Name=OE9A103882T1;product=OE9A103882P1;Description=G-type lectin S-receptor-like serine threonine- kinase At4g27290 isoform X2;Ontology_term=GO:0004674%2C GO:0005524%2C GO:0006468%2C GO:0009069
OE9A073014	11.7636	3.20097	0.705377	4.53797	5.67995e-06	5.47001e-05	OE9A073014	ID=OE9A073014T1;Parent=OE9A073014;Name=OE9A073014T1;product=OE9A073014P1;Description=unnamed protein product;Ontology_term=GO:0016021
OE9A040988	3.73702	3.19964	1.51152	2.11683	0.034274	0.090904	OE9A040988	ID=OE9A040988T1;Parent=OE9A040988;Name=OE9A040988T1;product=OE9A040988P1;Description=major allergen Pru ar 1-like;Ontology_term=GO:0006952%2C GO:0009607
OE9A003527	91.7687	3.19774	0.403028	7.9343	2.11679e-15	1.69047e-13	OE9A003527	ID=OE9A003527T1;Parent=OE9A003527;Name=OE9A003527T1;product=OE9A003527P1;Description=uncharacterized N-acetyltransferase p20-like;Ontology_term=GO:0006474%2C GO:0008080%2C GO:0016020%2C GO:0042967
OE9A042822	5.88161	3.19356	0.839844	3.80256	0.00014321	0.000931713	OE9A042822	ID=OE9A042822T1;Parent=OE9A042822;Name=OE9A042822T1;product=OE9A042822P1;Description=auxin-responsive SAUR32-like;Ontology_term=GO:0009733
OE9A048965	112.261	3.19216	0.368022	8.67382	4.17865e-18	5.33932e-16	OE9A048965	ID=OE9A048965T1;Parent=OE9A048965;Name=OE9A048965T1;product=OE9A048965P1;Description=ammonium transporter 3 member 1-like;Ontology_term=GO:0005887%2C GO:0008519%2C GO:0015695%2C GO:0019740%2C GO:0072488
OE9A096610	18.1547	3.19184	0.734126	4.34781	1.37507e-05	0.000120047	OE9A096610	ID=OE9A096610T1;Parent=OE9A096610;Name=OE9A096610T1;product=OE9A096610P1;Description=premnaspirodiene oxygenase-like;Ontology_term=GO:0004497%2C GO:0005506%2C GO:0016021%2C GO:0016705%2C GO:0020037%2C GO:0055114
OE9A033210	7.45391	3.18824	0.825888	3.86038	0.00011321	0.000761666	OE9A033210	ID=OE9A033210T1;Parent=OE9A033210;Name=OE9A033210T1;product=OE9A033210P1;Description=Uroporphyrinogen III synthase UROS HEM4;Ontology_term=GO:0004852%2C GO:0006783%2C GO:0015994
OE9A009341	2.91635	3.18758	1.37215	2.32305	0.0201762	0.0598209	OE9A009341	ID=OE9A009341T1;Parent=OE9A009341;Name=OE9A009341T1;product=OE9A009341P1;Description=premnaspirodiene oxygenase-like;Ontology_term=GO:0004497%2C GO:0005506%2C GO:0016705%2C GO:0020037%2C GO:0055114
OE9A016520	7.11964	3.18442	0.894363	3.56054	0.000370088	0.00210752	OE9A016520	ID=OE9A016520T1;Parent=OE9A016520;Name=OE9A016520T1;product=OE9A016520P1
OE9A062170	71.2712	3.184	0.836175	3.80781	0.000140203	0.000914765	OE9A062170	ID=OE9A062170T1;Parent=OE9A062170;Name=OE9A062170T1;product=OE9A062170P1;Description=berberine bridge enzyme-like 13;Ontology_term=GO:0016614%2C GO:0050660%2C GO:0055114
OE9A064451	14.5902	3.18304	0.666185	4.77802	1.77032e-06	1.94e-05	OE9A064451	ID=OE9A064451T1;Parent=OE9A064451;Name=OE9A064451T1;product=OE9A064451P1;Description=pectinesterase QRT1;Ontology_term=GO:0005618%2C GO:0005982%2C GO:0005985%2C GO:0030599%2C GO:0042545%2C GO:0045330%2C GO:0045490
OE9A098640	5.33034	3.18274	0.917368	3.46942	0.000521576	0.0028321	OE9A098640	ID=OE9A098640T1;Parent=OE9A098640;Name=OE9A098640T1;product=OE9A098640P1;Description=probable aquaporin NIP-type;Ontology_term=GO:0005887%2C GO:0006833%2C GO:0009992%2C GO:0015250%2C GO:0015254%2C GO:0015793%2C GO:0034220
OE9A013819	6.52887	3.18111	1.09488	2.90544	0.0036674	0.0148537	OE9A013819	ID=OE9A013819T1;Parent=OE9A013819;Name=OE9A013819T1;product=OE9A013819P1;Description=wall-associated receptor kinase-like 14;Ontology_term=GO:0030247
OE9A019660	8.57709	3.18049	0.865944	3.67286	0.000239848	0.00145328	OE9A019660	ID=OE9A019660T1;Parent=OE9A019660;Name=OE9A019660T1;product=OE9A019660P1;Description=AP2 ERF and B3 domain-containing transcription factor At1g50680;Ontology_term=GO:0003677
OE9A052762	20.98	3.18042	0.668718	4.756	1.97467e-06	2.13754e-05	OE9A052762	ID=OE9A052762T1;Parent=OE9A052762;Name=OE9A052762T1;product=OE9A052762P1;Description=probable LRR receptor-like serine threonine- kinase At3g47570;Ontology_term=GO:0004672%2C GO:0005515%2C GO:0005524%2C GO:0006468
OE9A104244	97.9377	3.17925	0.42597	7.46355	8.42242e-14	4.82161e-12	OE9A104244	ID=OE9A104244T1;Parent=OE9A104244;Name=OE9A104244T1;product=OE9A104244P1;Description=scopoletin glucosyltransferase-like;Ontology_term=GO:0009813%2C GO:0043231%2C GO:0052696%2C GO:0080043%2C GO:0080044
OE9A038571	6.54127	3.17863	1.03177	3.08076	0.00206473	0.0091516	OE9A038571	ID=OE9A038571T1;Parent=OE9A038571;Name=OE9A038571T1;product=OE9A038571P1;Description=probable cytosolic oligopeptidase A;Ontology_term=GO:0004222%2C GO:0006508%2C GO:0006518%2C GO:0009507%2C GO:0046872
OE9A045874	31.5803	3.17855	0.529443	6.00357	1.93025e-09	4.27304e-08	OE9A045874	ID=OE9A045874T1;Parent=OE9A045874;Name=OE9A045874T1;product=OE9A045874P1;Description=LEAF RUST 10 DISEASE-RESISTANCE LOCUS RECEPTOR-LIKE PROTEIN KINASE-like;Ontology_term=GO:0004674%2C GO:0004713%2C GO:0005524%2C GO:0006468%2C GO:0009069%2C GO:0016021
OE9A021322	76.8003	3.17753	0.336919	9.43114	4.05637e-21	8.20105e-19	OE9A021322	ID=OE9A021322T1;Parent=OE9A021322;Name=OE9A021322T1;product=OE9A021322P1;Description=LRR receptor-like serine threonine- kinase GSO2;Ontology_term=GO:0005515%2C GO:0016021
OE9A090299	50.3486	3.17731	0.487992	6.51098	7.46632e-11	2.2607e-09	OE9A090299	ID=OE9A090299T1;Parent=OE9A090299;Name=OE9A090299T1;product=OE9A090299P1
OE9A104428	1.80856	3.17495	1.25419	2.53146	0.0113588	0.0375817	OE9A104428	ID=OE9A104428T1;Parent=OE9A104428;Name=OE9A104428T1;product=OE9A104428P1;Description=cytochrome b6 (chloroplast);Ontology_term=GO:0006118%2C GO:0009055%2C GO:0016020%2C GO:0016491%2C GO:0022904%2C GO:0044424
OE9A070505	33.6697	3.17367	0.6379	4.97519	6.51827e-07	7.9688e-06	OE9A070505	ID=OE9A070505T1;Parent=OE9A070505;Name=OE9A070505T1;product=OE9A070505P1;Description=high affinity nitrate transporter -like;Ontology_term=GO:0016021%2C GO:0055085
OE9A036113	1.21828	3.17351	1.50548	2.10797	0.0350336	0.0924277	OE9A036113	ID=OE9A036113T1;Parent=OE9A036113;Name=OE9A036113T1;product=OE9A036113P1;Description=monothiol glutaredoxin-S2-like;Ontology_term=GO:0005623%2C GO:0006118%2C GO:0009055%2C GO:0015035%2C GO:0016021%2C GO:0045454%2C GO:0055114
OE9A074318	5.48239	3.17236	1.17838	2.69213	0.0070997	0.0255772	OE9A074318	ID=OE9A074318T1;Parent=OE9A074318;Name=OE9A074318T1;product=OE9A074318P1;Description=Histone acetyltransferase;Ontology_term=GO:0008270
OE9A009812	167.946	3.17182	0.695979	4.55735	5.18031e-06	5.03679e-05	OE9A009812	ID=OE9A009812T1;Parent=OE9A009812;Name=OE9A009812T1;product=OE9A009812P1;Description=probable WRKY transcription factor 40;Ontology_term=GO:0003700%2C GO:0005667%2C GO:0006355%2C GO:0043565%2C GO:0045449
OE9D001799	7.56664	3.17118	0.655447	4.83819	1.31026e-06	1.4837e-05	OE9D001799	ID=OE9D001799T1;Parent=OE9D001799;product=OE9D001799P1;Description=, partial (chloroplast);Ontology_term=GO:0006118%2C GO:0009523%2C GO:0009535%2C GO:0009772%2C GO:0016021%2C GO:0016168%2C GO:0018298%2C GO:0045156%2C GO:0046872;
OE9A042297	4.13332	3.16737	1.2155	2.60582	0.00916534	0.0314308	OE9A042297	ID=OE9A042297T1;Parent=OE9A042297;Name=OE9A042297T1;product=OE9A042297P1;Description=F-box SNE-like;Ontology_term=GO:0005515
OE9A084120	8.45211	3.16428	1.26755	2.49638	0.0125468	0.0407935	OE9A084120	ID=OE9A084120T1;Parent=OE9A084120;Name=OE9A084120T1;product=OE9A084120P1;Description=wall-associated receptor kinase 2-like;Ontology_term=GO:0030247
OE9A091879	35.7287	3.16408	0.553891	5.71246	1.11352e-08	2.10849e-07	OE9A091879	ID=OE9A091879T1;Parent=OE9A091879;Name=OE9A091879T1;product=OE9A091879P1
OE9A081254	16.5347	3.16387	0.562672	5.62294	1.87739e-08	3.38822e-07	OE9A081254	ID=OE9A081254T1;Parent=OE9A081254;Name=OE9A081254T1;product=OE9A081254P1;Description=triose phosphate phosphate translocator, non-green plastid, chloroplastic-like;Ontology_term=GO:0005739%2C GO:0009941%2C GO:0015120%2C GO:0015121%2C GO:0015713%2C GO:0016021%2C GO:0034219%2C GO:0089722
OE9A007517	64.8402	3.16377	0.527545	5.99715	2.00814e-09	4.43317e-08	OE9A007517	ID=OE9A007517T1;Parent=OE9A007517;Name=OE9A007517T1;product=OE9A007517P1
OE9A090808	22.0984	3.16368	0.70478	4.48889	7.15944e-06	6.71268e-05	OE9A090808	ID=OE9A090808T1;Parent=OE9A090808;Name=OE9A090808T1;product=OE9A090808P1;Description=L-lactate dehydrogenase B-like;Ontology_term=GO:0004459%2C GO:0005737%2C GO:0006094%2C GO:0006096%2C GO:0006534%2C GO:0055114
OE9A054451	2.27678	3.16356	1.29036	2.45169	0.0142188	0.0451183	OE9A054451	ID=OE9A054451T1;Parent=OE9A054451;Name=OE9A054451T1;product=OE9A054451P1;Description=uncharacterized protein LOC111408230;Ontology_term=GO:0005515
OE9A021640	8.81376	3.16172	0.75338	4.19671	2.70817e-05	0.000217744	OE9A021640	ID=OE9A021640T1;Parent=OE9A021640;Name=OE9A021640T1;product=OE9A021640P1;Description=cation calcium exchanger 1-like;Ontology_term=GO:0016021%2C GO:0055085
OE9mt000024	43.8025	3.16086	0.598908	5.27771	1.30808e-07	1.93093e-06	OE9mt000024	ID=OE9mt000024T1;Parent=OE9mt000024;product=OE9mt000024P1;Description=ccmFn;Name=OE9mt000024T1
OE9A106087	2.14682	3.16054	1.49102	2.11971	0.0340301	0.0903323	OE9A106087	ID=OE9A106087T1;Parent=OE9A106087;Name=OE9A106087T1;product=OE9A106087P1;Description=sodium transporter HKT1-like;Ontology_term=GO:0005886%2C GO:0015081%2C GO:0016021%2C GO:0035725
OE9A053482	4.61127	3.15889	0.897537	3.51951	0.000432347	0.00240986	OE9A053482	ID=OE9A053482T1;Parent=OE9A053482;Name=OE9A053482T1;product=OE9A053482P1
OE9A027544	3.53325	3.15881	1.13996	2.77099	0.00558856	0.0209926	OE9A027544	ID=OE9A027544T1;Parent=OE9A027544;Name=OE9A027544T1;product=OE9A027544P1;md5=d4913f840152b2cf652ff205afdd3de5;INTERPRO=<table><tr><th>DB</th><th>ID</th><th>Description</th></tr><tr><td>PANTHER</td><td>PTHR33494</td><td></td></tr><tr><td>PANTHER</td><td>PTHR33494:SF1</td><td></td></tr></table>;Description=Solanesyl diphosphate synthase 2, chloroplastic
OE9A094863	36.2042	3.15855	0.60442	5.22575	1.73453e-07	2.46586e-06	OE9A094863	ID=OE9A094863T1;Parent=OE9A094863;Name=OE9A094863T1;product=OE9A094863P1;Description=uncharacterized protein LOC111372000;Ontology_term=GO:0016021
OE9A002550	10.7364	3.15843	0.785843	4.01916	5.84053e-05	0.000426651	OE9A002550	ID=OE9A002550T1;Parent=OE9A002550;Name=OE9A002550T1;product=OE9A002550P1;Description=BEL1-like homeodomain 4;Ontology_term=GO:0003677%2C GO:0006355
OE9A044770	35.5882	3.15312	0.722	4.3672	1.25851e-05	0.000110932	OE9A044770	ID=OE9A044770T1;Parent=OE9A044770;Name=OE9A044770T1;product=OE9A044770P1;Description=copal-8-ol diphosphate hydratase, chloroplastic-like;Ontology_term=GO:0000287%2C GO:0010333%2C GO:0016102%2C GO:0050559
OE9A110773	7.50428	3.15205	1.29345	2.43693	0.0148127	0.0466138	OE9A110773	ID=OE9A110773T1;Parent=OE9A110773;Name=OE9A110773T1;product=OE9A110773P1;Description=lysosomal Pro-X carboxypeptidase-like;Ontology_term=GO:0004185%2C GO:0006508%2C GO:0008239
OE9A035254	4.49941	3.15204	1.07431	2.93401	0.00334619	0.013771	OE9A035254	ID=OE9A035254T1;Parent=OE9A035254;Name=OE9A035254T1;product=OE9A035254P1;Description=ECERIFERUM 1-like;Ontology_term=GO:0005506%2C GO:0006633%2C GO:0016021%2C GO:0016491%2C GO:0055114
OE9A012697	3.62608	3.15106	1.18368	2.66208	0.00776585	0.0275025	OE9A012697	ID=OE9A012697T1;Parent=OE9A012697;Name=OE9A012697T1;product=OE9A012697P1;Description=acidic mammalian chitinase-like;Ontology_term=GO:0004568%2C GO:0005576%2C GO:0005975%2C GO:0006032%2C GO:0008061%2C GO:0016998
OE9A014291	2100.1	3.14576	0.220338	14.2769	3.04649e-46	3.2439e-42	OE9A014291	ID=OE9A014291T1;Parent=OE9A014291;Name=OE9A014291T1;product=OE9A014291P1;Description=LRR receptor-like serine threonine- kinase GSO1;Ontology_term=GO:0005515
OE9A030468	4.53889	3.14507	0.784905	4.00694	6.15113e-05	0.000446369	OE9A030468	ID=OE9A030468T1;Parent=OE9A030468;Name=OE9A030468T1;product=OE9A030468P1;Description=ribosomal L14 (chloroplast);Ontology_term=GO:0003735%2C GO:0005840%2C GO:0006412%2C GO:0042254
OE9A018218	25.5078	3.14088	1.48716	2.112	0.0346863	0.091731	OE9A018218	ID=OE9A018218T1;Parent=OE9A018218;Name=OE9A018218T1;product=OE9A018218P1;Description=8-hydroxygeraniol dehydrogenase-like;Ontology_term=GO:0008270%2C GO:0009805%2C GO:0009809%2C GO:0009811%2C GO:0045551%2C GO:0052747%2C GO:0055114
OE9A019670	8.14104	3.14029	1.05629	2.97293	0.00294971	0.0123672	OE9A019670	ID=OE9A019670T1;Parent=OE9A019670;Name=OE9A019670T1;product=OE9A019670P1;Description=G-type lectin S-receptor-like serine threonine- kinase At4g27290;Ontology_term=GO:0004674%2C GO:0005524%2C GO:0005886%2C GO:0006468%2C GO:0006952%2C GO:0009069%2C GO:0009506%2C GO:0016021%2C GO:0048544
OE9A055998	2.7974	3.13787	1.3437	2.33525	0.0195306	0.0582525	OE9A055998	ID=OE9A055998T1;Parent=OE9A055998;Name=OE9A055998T1;product=OE9A055998P1;Description=calmodulin-binding receptor-like cytoplasmic kinase 2;Ontology_term=GO:0004674%2C GO:0005524%2C GO:0006468%2C GO:0009069
OE9A028526	6.93687	3.13632	0.945541	3.31696	0.000910014	0.00459089	OE9A028526	ID=OE9A028526T1;Parent=OE9A028526;Name=OE9A028526T1;product=OE9A028526P1;Description=transcription factor MYB64-like;Ontology_term=GO:0003677
OE9A007254	6.00516	3.13624	0.986051	3.1806	0.00146968	0.0068919	OE9A007254	ID=OE9A007254T1;Parent=OE9A007254;Name=OE9A007254T1;product=OE9A007254P1;Description=NBR1 homolog;Ontology_term=GO:0005515%2C GO:0008270
OE9A045372	4.20545	3.1334	1.07053	2.92696	0.00342294	0.0140272	OE9A045372	ID=OE9A045372T1;Parent=OE9A045372;Name=OE9A045372T1;product=OE9A045372P1
OE9A017686	39.2286	3.13302	0.651661	4.80775	1.52637e-06	1.70127e-05	OE9A017686	ID=OE9A017686T1;Parent=OE9A017686;Name=OE9A017686T1;product=OE9A017686P1
OE9A073515	25.4309	3.13235	0.968467	3.23434	0.00121923	0.00589663	OE9A073515	ID=OE9A073515T1;Parent=OE9A073515;Name=OE9A073515T1;product=OE9A073515P1;Description=zinc finger ZAT11-like;Ontology_term=GO:0046872
OE9A013031	3.61676	3.13173	1.03022	3.03986	0.00236692	0.0102771	OE9A013031	ID=OE9A013031T1;Parent=OE9A013031;Name=OE9A013031T1;product=OE9A013031P1
OE9A051134	15.067	3.12994	0.654795	4.78003	1.75265e-06	1.92394e-05	OE9A051134	ID=OE9A051134T1;Parent=OE9A051134;Name=OE9A051134T1;product=OE9A051134P1;Description=G-type lectin S-receptor-like serine threonine- kinase LECRK3;Ontology_term=GO:0004672%2C GO:0005515%2C GO:0005524%2C GO:0006468%2C GO:0016020%2C GO:0048544
OE9A000235	9.69814	3.12976	1.12467	2.78282	0.00538879	0.0203764	OE9A000235	ID=OE9A000235T1;Parent=OE9A000235;Name=OE9A000235T1;product=OE9A000235P1;Description=B3 domain-containing transcription factor FUS3-like;Ontology_term=GO:0003677%2C GO:0050794
OE9A050767	8.83163	3.12761	1.00303	3.11815	0.00181992	0.0082523	OE9A050767	ID=OE9A050767T1;Parent=OE9A050767;Name=OE9A050767T1;product=OE9A050767P1
OE9A107819	4.53086	3.12735	1.08637	2.87872	0.00399297	0.0159081	OE9A107819	ID=OE9A107819T1;Parent=OE9A107819;Name=OE9A107819T1;product=OE9A107819P1;Description=ATP-dependent 6-phosphofructokinase 6-like;Ontology_term=GO:0003872%2C GO:0005524%2C GO:0005945%2C GO:0006000%2C GO:0006002%2C GO:0006012%2C GO:0006013%2C GO:0006094%2C GO:0006098%2C GO:0046872%2C GO:0061615
OE9A059291	2.43649	3.12697	1.21022	2.5838	0.00977193	0.0331691	OE9A059291	ID=OE9A059291T1;Parent=OE9A059291;Name=OE9A059291T1;product=OE9A059291P1
OE9A110284	1084.43	3.12697	0.352013	8.8831	6.50213e-19	9.4411e-17	OE9A110284	ID=OE9A110284T1;Parent=OE9A110284;Name=OE9A110284T1;product=OE9A110284P1;Description=cytochrome P450 CYP72A219-like;Ontology_term=GO:0004497%2C GO:0005506%2C GO:0016021%2C GO:0016705%2C GO:0020037%2C GO:0055114
OE9A006693	399.692	3.1265	0.285005	10.97	5.32989e-28	3.62251e-25	OE9A006693	ID=OE9A006693T2;Parent=OE9A006693;Name=OE9A006693T2;product=OE9A006693P2;Description=MLO 3;Ontology_term=GO:0005886%2C GO:0006952%2C GO:0016021
OE9A121332	5.972	3.12584	1.08091	2.89186	0.00382964	0.0153763	OE9A121332	ID=OE9A121332T1;Parent=OE9A121332;Name=OE9A121332T1;product=OE9A121332P1;Description=rust resistance kinase Lr10-like;Ontology_term=GO:0004672%2C GO:0005524%2C GO:0006468
OE9A008662	8.32727	3.12475	0.79263	3.94226	8.07176e-05	0.000565944	OE9A008662	ID=OE9A008662T1;Parent=OE9A008662;Name=OE9A008662T1;product=OE9A008662P1
OE9A091606	5.05139	3.12344	1.1678	2.67464	0.00748097	0.0267307	OE9A091606	ID=OE9A091606T2;Parent=OE9A091606;Name=OE9A091606T2;product=OE9A091606P2;Description=abscisic acid 8 -hydroxylase 2;Ontology_term=GO:0004497%2C GO:0005506%2C GO:0016021%2C GO:0016705%2C GO:0020037%2C GO:0055114
OE9A007360	7.89518	3.12101	0.814071	3.83383	0.000126161	0.000835772	OE9A007360	ID=OE9A007360T1;Parent=OE9A007360;Name=OE9A007360T1;product=OE9A007360P1;Description=MLO 9;Ontology_term=GO:0005516%2C GO:0006952%2C GO:0009607%2C GO:0016021
OE9A103165	5.75131	3.12055	0.834014	3.7416	0.000182851	0.00114822	OE9A103165	ID=OE9A103165T1;Parent=OE9A103165;Name=OE9A103165T1;product=OE9A103165P1
OE9A047766	2.7887	3.11924	1.07255	2.90825	0.0036346	0.014747	OE9A047766	ID=OE9A047766T2;Parent=OE9A047766;Name=OE9A047766T2;product=OE9A047766P2;Description=glutamate receptor -like;Ontology_term=GO:0004970%2C GO:0006811%2C GO:0007165%2C GO:0007268%2C GO:0016020
OE9A012607	5.47342	3.11902	1.02954	3.02954	0.00244928	0.0105844	OE9A012607	ID=OE9A012607T1;Parent=OE9A012607;Name=OE9A012607T1;product=OE9A012607P1
OE9A003775	33.6251	3.11815	0.516999	6.03125	1.627e-09	3.65236e-08	OE9A003775	ID=OE9A003775T1;Parent=OE9A003775;Name=OE9A003775T1;product=OE9A003775P1;Description=LEAF RUST 10 DISEASE-RESISTANCE LOCUS RECEPTOR-LIKE PROTEIN KINASE-like;Ontology_term=GO:0004672%2C GO:0005524%2C GO:0006468
OE9A084968	11.6528	3.11795	0.62208	5.01213	5.38304e-07	6.69871e-06	OE9A084968	ID=OE9A084968T1;Parent=OE9A084968;Name=OE9A084968T1;product=OE9A084968P1;Description=transcription factor bHLH041 isoform X2;Ontology_term=GO:0046983
OE9A010840	136.436	3.11793	0.312848	9.96628	2.1409e-23	6.51324e-21	OE9A010840	ID=OE9A010840T1;Parent=OE9A010840;Name=OE9A010840T1;product=OE9A010840P1;Description=calcium-transporting ATPase 12, plasma membrane-type-like;Ontology_term=GO:0000166%2C GO:0006810%2C GO:0016021%2C GO:0046872
OE9A056079	4.02998	3.11577	1.17903	2.64267	0.00822561	0.0288208	OE9A056079	ID=OE9A056079T1;Parent=OE9A056079;Name=OE9A056079T1;product=OE9A056079P1;Description=death-associated inhibitor of apoptosis 1-like isoform X2;Ontology_term=GO:0005515%2C GO:0008270
OE9A010623	104.513	3.11282	0.349758	8.89995	5.58733e-19	8.26304e-17	OE9A010623	ID=OE9A010623T1;Parent=OE9A010623;Name=OE9A010623T1;product=OE9A010623P1;Description=tubby-like F-box 7;Ontology_term=GO:0005929%2C GO:0035091%2C GO:0061512
OE9A067792	28.2388	3.11258	0.526277	5.91434	3.33213e-09	6.99353e-08	OE9A067792	ID=OE9A067792T1;Parent=OE9A067792;Name=OE9A067792T1;product=OE9A067792P1;Description=cytochrome P450 78A7-like;Ontology_term=GO:0004497%2C GO:0005506%2C GO:0016021%2C GO:0016705%2C GO:0020037%2C GO:0055114
OE9A008888	3.5629	3.11254	1.16796	2.66493	0.00770043	0.0273466	OE9A008888	ID=OE9A008888T1;Parent=OE9A008888;Name=OE9A008888T1;product=OE9A008888P1
OE9A005571	5.00669	3.11204	1.22862	2.53296	0.0113103	0.0374517	OE9A005571	ID=OE9A005571T1;Parent=OE9A005571;Name=OE9A005571T1;product=OE9A005571P1;Description=F-box PP2-B15-like;Ontology_term=GO:0005515
OE9A010612	20.0026	3.11138	1.05828	2.94002	0.00328187	0.0135458	OE9A010612	ID=OE9A010612T1;Parent=OE9A010612;Name=OE9A010612T1;product=OE9A010612P1
OE9A044573	5.06228	3.11118	1.1149	2.79055	0.00526182	0.0200145	OE9A044573	ID=OE9A044573T1;Parent=OE9A044573;Name=OE9A044573T1;product=OE9A044573P1;Description=DCN1 4;Ontology_term=GO:0000151%2C GO:0031624%2C GO:0032182%2C GO:0045116%2C GO:0051443%2C GO:0097602
OE9A103732	3.65477	3.11049	1.23732	2.5139	0.0119404	0.0391766	OE9A103732	ID=OE9A103732T1;Parent=OE9A103732;Name=OE9A103732T1;product=OE9A103732P1
OE9A064110	4.98348	3.10684	1.04612	2.96987	0.00297929	0.0124699	OE9A064110	ID=OE9A064110T1;Parent=OE9A064110;Name=OE9A064110T1;product=OE9A064110P1
OE9A059840	4.83573	3.10611	1.22941	2.52651	0.0115203	0.038013	OE9A059840	ID=OE9A059840T1;Parent=OE9A059840;Name=OE9A059840T1;product=OE9A059840P1;Description=4-alpha-glucanotransferase DPE2;Ontology_term=GO:0004134%2C GO:0005977%2C GO:0005982%2C GO:0005985%2C GO:2001070
OE9A107032	3.78463	3.10303	1.01382	3.06074	0.00220792	0.00969883	OE9A107032	ID=OE9A107032T1;Parent=OE9A107032;Name=OE9A107032T1;product=OE9A107032P1;Description=CAS1 domain-containing protein 1
OE9A106270	299.776	3.10288	0.338329	9.17119	4.67835e-20	8.16641e-18	OE9A106270	ID=OE9A106270T1;Parent=OE9A106270;Name=OE9A106270T1;product=OE9A106270P1;Description=G-type lectin S-receptor-like serine threonine- kinase LECRK3;Ontology_term=GO:0004674%2C GO:0005515%2C GO:0005524%2C GO:0005886%2C GO:0006468%2C GO:0009069%2C GO:0048544
OE9A110597	9.09061	3.10003	0.742269	4.17642	2.96134e-05	0.000235609	OE9A110597	ID=OE9A110597T1;Parent=OE9A110597;Name=OE9A110597T1;product=OE9A110597P1
OE9A002507	1.43529	3.09939	1.42572	2.17392	0.0297115	0.0812659	OE9A002507	ID=OE9A002507T1;Parent=OE9A002507;Name=OE9A002507T1;product=OE9A002507P1
OE9A029932	5.13536	3.09937	1.05421	2.94	0.00328214	0.0135458	OE9A029932	ID=OE9A029932T1;Parent=OE9A029932;Name=OE9A029932T1;product=OE9A029932P1
OE9A022882	21.2038	3.09739	0.611612	5.0643	4.09898e-07	5.29469e-06	OE9A022882	ID=OE9A022882T1;Parent=OE9A022882;Name=OE9A022882T1;product=OE9A022882P1;Description=wall-associated receptor kinase-like 8;Ontology_term=GO:0004674%2C GO:0005524%2C GO:0005886%2C GO:0006468%2C GO:0007166%2C GO:0009069%2C GO:0016021
OE9A093242	28.5988	3.09666	0.532511	5.8152	6.05624e-09	1.20611e-07	OE9A093242	ID=OE9A093242T1;Parent=OE9A093242;Name=OE9A093242T1;product=OE9A093242P1;Description=NRT1 PTR FAMILY -like;Ontology_term=GO:0005215%2C GO:0006810%2C GO:0016021
OE9A005917	3.9878	3.09589	1.25848	2.46004	0.0138923	0.0442692	OE9A005917	ID=OE9A005917T1;Parent=OE9A005917;Name=OE9A005917T1;product=OE9A005917P1;Description=transcription factor MYB63-like;Ontology_term=GO:0003677
OE9A079865	2.31568	3.09561	1.33036	2.32691	0.0199703	0.0593093	OE9A079865	ID=OE9A079865T1;Parent=OE9A079865;Name=OE9A079865T1;product=OE9A079865P1;Description=B3 domain-containing REM16-like;Ontology_term=GO:0003677
OE9A076113	15.8674	3.09556	0.708902	4.36669	1.26141e-05	0.000111157	OE9A076113	ID=OE9A076113T1;Parent=OE9A076113;Name=OE9A076113T1;product=OE9A076113P1;Description=probable carboxylesterase 18;Ontology_term=GO:0008152%2C GO:0016787
OE9A061280	4.23326	3.09521	1.3559	2.28278	0.0224436	0.0651524	OE9A061280	ID=OE9A061280T1;Parent=OE9A061280;Name=OE9A061280T1;product=OE9A061280P1
OE9A115211	5.95035	3.09369	0.787849	3.92675	8.61009e-05	0.000598305	OE9A115211	ID=OE9A115211T1;Parent=OE9A115211;Name=OE9A115211T1;product=OE9A115211P1;Description=NADH-ubiquinone reductase complex 1 MLRQ subunit;Ontology_term=GO:0016021
OE9A101287	4.21334	3.09361	1.12925	2.73951	0.00615303	0.0227176	OE9A101287	ID=OE9A101287T1;Parent=OE9A101287;Name=OE9A101287T1;product=OE9A101287P1
OE9A010255	781.924	3.09297	0.633427	4.88292	1.04527e-06	1.21154e-05	OE9A010255	ID=OE9A010255T1;Parent=OE9A010255;Name=OE9A010255T1;product=OE9A010255P1;Description=acidic endochitinase-like;Ontology_term=GO:0004568%2C GO:0005576%2C GO:0005975%2C GO:0006032%2C GO:0008061%2C GO:0016998
OE9A003770	6.15688	3.0915	0.908041	3.40458	0.000662654	0.00348823	OE9A003770	ID=OE9A003770T1;Parent=OE9A003770;Name=OE9A003770T1;product=OE9A003770P1;Description=calcium-transporting ATPase 12, plasma membrane-type-like;Ontology_term=GO:0000166%2C GO:0016020%2C GO:0046872
OE9A115081	3.50773	3.09048	1.15773	2.66944	0.00759773	0.0270541	OE9A115081	ID=OE9A115081T1;Parent=OE9A115081;Name=OE9A115081T1;product=OE9A115081P1
OE9A002018	2.56013	3.08909	1.30926	2.35942	0.0183034	0.0552946	OE9A002018	ID=OE9A002018T1;Parent=OE9A002018;Name=OE9A002018T1;product=OE9A002018P1
OE9A026017	24.8411	3.08906	0.658432	4.69154	2.71154e-06	2.83064e-05	OE9A026017	ID=OE9A026017T1;Parent=OE9A026017;Name=OE9A026017T1;product=OE9A026017P1;Description=probable WRKY transcription factor 75;Ontology_term=GO:0003700%2C GO:0005667%2C GO:0006355%2C GO:0043565%2C GO:0044212%2C GO:0045449%2C GO:0048364
OE9A090873	4.206	3.0889	1.09201	2.82864	0.00467462	0.018164	OE9A090873	ID=OE9A090873T1;Parent=OE9A090873;Name=OE9A090873T1;product=OE9A090873P1;Description=heat shock 70 kDa 15-like;Ontology_term=GO:0000166%2C GO:0016491
OE9A112193	2.20509	3.08843	1.33951	2.30565	0.0211304	0.0620565	OE9A112193	ID=OE9A112193T1;Parent=OE9A112193;Name=OE9A112193T1;product=OE9A112193P1;Description=cytosolic sulfotransferase 5-like;Ontology_term=GO:0008146
OE9A040863	7.7185	3.08754	0.680032	4.54028	5.61787e-06	5.42004e-05	OE9A040863	ID=OE9A040863T1;Parent=OE9A040863;Name=OE9A040863T1;product=OE9A040863P1;Description=probable phytol kinase 3, chloroplastic;Ontology_term=GO:0016020
OE9A104805	6.78155	3.08501	0.991125	3.11263	0.00185429	0.00837341	OE9A104805	ID=OE9A104805T1;Parent=OE9A104805;Name=OE9A104805T1;product=OE9A104805P1;Description=MADS box transcription factor, partial;Ontology_term=GO:0003677%2C GO:0003700%2C GO:0005634%2C GO:0005667%2C GO:0006355%2C GO:0007275%2C GO:0045449%2C GO:0046983
OE9A054417	3.27766	3.08469	1.30901	2.3565	0.0184481	0.055616	OE9A054417	ID=OE9A054417T1;Parent=OE9A054417;Name=OE9A054417T1;product=OE9A054417P1
OE9A036993	2.14919	3.08413	1.39923	2.20417	0.0275127	0.0765096	OE9A036993	ID=OE9A036993T1;Parent=OE9A036993;Name=OE9A036993T1;product=OE9A036993P1;Description=dehydration-responsive element-binding 2D-like;Ontology_term=GO:0003677%2C GO:0003700%2C GO:0005667%2C GO:0006355%2C GO:0010200%2C GO:0045449
OE9A085092	4.49437	3.0841	1.14896	2.68425	0.00726927	0.0261027	OE9A085092	ID=OE9A085092T1;Parent=OE9A085092;Name=OE9A085092T1;product=OE9A085092P1
OE9A088992	3.3059	3.08335	1.26774	2.43215	0.0150094	0.0471382	OE9A088992	ID=OE9A088992T1;Parent=OE9A088992;Name=OE9A088992T1;product=OE9A088992P1;Description=F-box SKIP8-like, partial;Ontology_term=GO:0005515
OE9A066383	16.954	3.07975	0.528332	5.82919	5.56962e-09	1.11756e-07	OE9A066383	ID=OE9A066383T1;Parent=OE9A066383;Name=OE9A066383T1;product=OE9A066383P1;Description=acyl-coenzyme A oxidase 3, peroxisomal;Ontology_term=GO:0000062%2C GO:0003995%2C GO:0003997%2C GO:0005777%2C GO:0006118%2C GO:0006637%2C GO:0009055%2C GO:0033539%2C GO:0050660%2C GO:0052890%2C GO:0055088
OE9A011699	4.1016	3.07935	1.18117	2.60703	0.00913325	0.031351	OE9A011699	ID=OE9A011699T1;Parent=OE9A011699;Name=OE9A011699T1;product=OE9A011699P1;Description=receptor kinase At4g00960;Ontology_term=GO:0004672%2C GO:0005524%2C GO:0006468%2C GO:0016020
OE9A040389	1.3012	3.07731	1.46218	2.10461	0.0353256	0.0929857	OE9A040389	ID=OE9A040389T1;Parent=OE9A040389;Name=OE9A040389T1;product=OE9A040389P1;Description=rust resistance kinase Lr10-like;Ontology_term=GO:0004672%2C GO:0005524%2C GO:0006468%2C GO:0016020
OE9A108317	2.32864	3.07653	1.29777	2.37063	0.0177578	0.0539934	OE9A108317	ID=OE9A108317T1;Parent=OE9A108317;Name=OE9A108317T1;product=OE9A108317P1;Description=lysosomal beta glucosidase-like;Ontology_term=GO:0004553%2C GO:0005975
OE9A090302	3.99133	3.07511	1.09638	2.80478	0.00503506	0.0192784	OE9A090302	ID=OE9A090302T1;Parent=OE9A090302;Name=OE9A090302T1;product=OE9A090302P1;Description=B-box zinc finger 24-like;Ontology_term=GO:0000989%2C GO:0005634%2C GO:0006355%2C GO:0008270%2C GO:0009640
OE9A059725	4.33825	3.07453	1.01887	3.01761	0.0025478	0.0109362	OE9A059725	ID=OE9A059725T1;Parent=OE9A059725;Name=OE9A059725T1;product=OE9A059725P1
OE9A060858	5.25729	3.07321	1.01256	3.0351	0.00240459	0.0104166	OE9A060858	ID=OE9A060858T1;Parent=OE9A060858;Name=OE9A060858T1;product=OE9A060858P1;Description=O-glucosyltransferase 1-like;Ontology_term=GO:0006664%2C GO:0012505%2C GO:0016020%2C GO:0046527
OE9A092043	4.13806	3.07319	1.21739	2.52442	0.011589	0.0382111	OE9A092043	ID=OE9A092043T1;Parent=OE9A092043;Name=OE9A092043T1;product=OE9A092043P1;Description=Probable LRR receptor-like serine/threonine-protein kinase At4g20940
OE9A086168	61.157	3.07153	0.515613	5.95704	2.56843e-09	5.53244e-08	OE9A086168	ID=OE9A086168T2;Parent=OE9A086168;Name=OE9A086168T2;product=OE9A086168P1;Description=cullin-1-like isoform X1;Ontology_term=GO:0006511%2C GO:0031625
OE9A044987	299.528	3.07142	0.293732	10.4565	1.368e-25	5.6025e-23	OE9A044987	ID=OE9A044987T2;Parent=OE9A044987;Name=OE9A044987T2;product=OE9A044987P2;Description=transmembrane 56-B-like;Ontology_term=GO:0016021
OE9A020215	2.32373	3.07102	1.46973	2.08952	0.0366613	0.0956398	OE9A020215	ID=OE9A020215T1;Parent=OE9A020215;Name=OE9A020215T1;product=OE9A020215P1;Description=AUGMIN subunit 5;Ontology_term=GO:0051225%2C GO:0070652
OE9mt000023	20.5246	3.06758	0.588384	5.21358	1.85233e-07	2.6121e-06	OE9mt000023	ID=OE9mt000023T1;Parent=OE9mt000023;product=OE9mt000023P1;Description=ccmFc;Name=OE9mt000023T1
OE9A086716	9.98502	3.06702	0.755117	4.06165	4.87277e-05	0.000362918	OE9A086716	ID=OE9A086716T1;Parent=OE9A086716;Name=OE9A086716T1;product=OE9A086716P1;Description=GDSL esterase lipase At5g45670-like;Ontology_term=GO:0016788
OE9A058544	3.37719	3.06699	1.34675	2.27732	0.022767	0.0658638	OE9A058544	ID=OE9A058544T1;Parent=OE9A058544;Name=OE9A058544T1;product=OE9A058544P1
OE9A101219	430.518	3.06538	0.372293	8.23379	1.8138e-16	1.8163e-14	OE9A101219	ID=OE9A101219T1;Parent=OE9A101219;Name=OE9A101219T1;product=OE9A101219P1;Description=major allergen Pru ar 1-like;Ontology_term=GO:0006952%2C GO:0009607
OE9A087256	10.4081	3.06532	0.640813	4.78349	1.7228e-06	1.89377e-05	OE9A087256	ID=OE9A087256T1;Parent=OE9A087256;Name=OE9A087256T1;product=OE9A087256P1
OE9A086057	3.90818	3.06499	0.928767	3.30007	0.000966614	0.00483367	OE9A086057	ID=OE9A086057T1;Parent=OE9A086057;Name=OE9A086057T1;product=OE9A086057P1;Description=, partial (chloroplast);Ontology_term=GO:0009507%2C GO:0009522%2C GO:0015979%2C GO:0016021
OE9A063858	17.5555	3.06493	0.54328	5.64154	1.68535e-08	3.06762e-07	OE9A063858	ID=OE9A063858T1;Parent=OE9A063858;Name=OE9A063858T1;product=OE9A063858P1;Description=cyclic nucleotide-gated ion channel 1;Ontology_term=GO:0005216%2C GO:0016021%2C GO:0034220
OE9A086482	4.26056	3.06375	0.937712	3.26726	0.00108594	0.00533682	OE9A086482	ID=OE9A086482T1;Parent=OE9A086482;Name=OE9A086482T1;product=OE9A086482P1
OE9A053371	5.75716	3.06269	1.16186	2.63602	0.00838847	0.0292694	OE9A053371	ID=OE9A053371T1;Parent=OE9A053371;Name=OE9A053371T1;product=OE9A053371P1
OE9A071160	8.76019	3.06061	1.06943	2.86191	0.004211	0.0166377	OE9A071160	ID=OE9A071160T1;Parent=OE9A071160;Name=OE9A071160T1;product=OE9A071160P1;Description=(E,E)-geranyllinalool synthase;Ontology_term=GO:0000287%2C GO:0008152%2C GO:0010333
OE9A058279	204.14	3.05945	0.313007	9.77438	1.45042e-22	3.73646e-20	OE9A058279	ID=OE9A058279T1;Parent=OE9A058279;Name=OE9A058279T1;product=OE9A058279P1;Description=beta-amyrin 28-oxidase-like;Ontology_term=GO:0004497%2C GO:0005506%2C GO:0007275%2C GO:0010268%2C GO:0016021%2C GO:0016125%2C GO:0016132%2C GO:0016705%2C GO:0020037%2C GO:0055114
OE9A106134	179.906	3.05696	0.398455	7.67202	1.6931e-14	1.12676e-12	OE9A106134	ID=OE9A106134T1;Parent=OE9A106134;Name=OE9A106134T1;product=OE9A106134P1;Description=wall-associated receptor kinase 2-like;Ontology_term=GO:0004674%2C GO:0005509%2C GO:0005515%2C GO:0005524%2C GO:0006468%2C GO:0009069%2C GO:0016021%2C GO:0030247
OE9A110182	12.6873	3.05457	0.596803	5.11822	3.08435e-07	4.12417e-06	OE9A110182	ID=OE9A110182T1;Parent=OE9A110182;Name=OE9A110182T1;product=OE9A110182P1
OE9A084261	3.22944	3.05309	1.23427	2.4736	0.013376	0.0429473	OE9A084261	ID=OE9A084261T1;Parent=OE9A084261;Name=OE9A084261T1;product=OE9A084261P1;Description=importin subunit alpha;Ontology_term=GO:0005515%2C GO:0005634%2C GO:0005737%2C GO:0006606%2C GO:0008565%2C GO:0016874
OE9A058511	15.2822	3.05185	0.608596	5.01457	5.31515e-07	6.61938e-06	OE9A058511	ID=OE9A058511T1;Parent=OE9A058511;Name=OE9A058511T1;product=OE9A058511P1;Description=pentatricopeptide repeat-containing ,;Ontology_term=GO:0016021
OE9A095595	31.1355	3.04925	0.665508	4.58184	4.60911e-06	4.53764e-05	OE9A095595	ID=OE9A095595T1;Parent=OE9A095595;Name=OE9A095595T1;product=OE9A095595P1;Description=probable LRR receptor-like serine threonine- kinase At3g47570;Ontology_term=GO:0004672%2C GO:0005515%2C GO:0005524%2C GO:0006468
OE9A026705	387.843	3.04909	0.403167	7.56285	3.94346e-14	2.39487e-12	OE9A026705	ID=OE9A026705T1;Parent=OE9A026705;Name=OE9A026705T1;product=OE9A026705P1;Description=wall-associated receptor kinase 2-like;Ontology_term=GO:0004674%2C GO:0005509%2C GO:0005515%2C GO:0005524%2C GO:0006468%2C GO:0009069%2C GO:0016021%2C GO:0030247
OE9A116792	8.83642	3.04767	0.805253	3.78473	0.000153875	0.000989606	OE9A116792	ID=OE9A116792T1;Parent=OE9A116792;Name=OE9A116792T1;product=OE9A116792P1;Description=homoserine kinase;Ontology_term=GO:0004413%2C GO:0005524%2C GO:0006544%2C GO:0006563%2C GO:0006566%2C GO:0016310
OE9A038412	2.76233	3.04682	1.33754	2.27793	0.0227306	0.0657709	OE9A038412	ID=OE9A038412T1;Parent=OE9A038412;Name=OE9A038412T1;product=OE9A038412P1;Description=zinc finger CONSTANS-LIKE 2-like;Ontology_term=GO:0005622%2C GO:0008270
OE9A051202	9.39842	3.04672	0.745488	4.08688	4.37216e-05	0.000330958	OE9A051202	ID=OE9A051202T1;Parent=OE9A051202;Name=OE9A051202T1;product=OE9A051202P1;Description=LEAF RUST 10 DISEASE-RESISTANCE LOCUS RECEPTOR-LIKE PROTEIN KINASE-like;Ontology_term=GO:0004672%2C GO:0005524%2C GO:0006468
OE9A049972	2.6368	3.04168	1.13791	2.67304	0.00751678	0.0268346	OE9A049972	ID=OE9A049972T1;Parent=OE9A049972;Name=OE9A049972T1;product=OE9A049972P1;Description=ATP-dependent DNA helicase DDM1;Ontology_term=GO:0005524
OE9A056537	6.27562	3.04162	0.948946	3.20526	0.00134939	0.00641635	OE9A056537	ID=OE9A056537T1;Parent=OE9A056537;Name=OE9A056537T1;product=OE9A056537P1
OE9D001267	3.12862	3.04059	1.32968	2.28671	0.022213	0.06463	OE9D001267	ID=OE9D001267T1;Parent=OE9D001267;product=OE9D001267P1;Description=serine incorporator 3;Ontology_term=GO:0015194%2C GO:0015825%2C GO:0016021;
OE9A101051	185.364	3.03958	0.59441	5.11361	3.16059e-07	4.2085e-06	OE9A101051	ID=OE9A101051T1;Parent=OE9A101051;Name=OE9A101051T1;product=OE9A101051P1
OE9mt000028	2.73466	3.03926	1.17287	2.5913	0.00956134	0.0325859	OE9mt000028	ID=OE9mt000028T1;Parent=OE9mt000028;product=OE9mt000028P1;Description=sdh3;Name=OE9mt000028T1
OE9A109352	4.36351	3.03898	1.15332	2.63498	0.00841414	0.0293333	OE9A109352	ID=OE9A109352T1;Parent=OE9A109352;Name=OE9A109352T1;product=OE9A109352P1;Description=LOB domain-containing 15;Ontology_term=GO:0005634
OE9mt000029	6.67346	3.03873	0.768564	3.95377	7.69286e-05	0.000542115	OE9mt000029	ID=OE9mt000029T1;Parent=OE9mt000029;product=OE9mt000029P1;Description=sdh3;Name=OE9mt000029T1
OE9A094291	13.9013	3.03657	0.781873	3.88371	0.000102873	0.000700227	OE9A094291	ID=OE9A094291T1;Parent=OE9A094291;Name=OE9A094291T1;product=OE9A094291P1
OE9A024351	3.7248	3.03568	1.09113	2.78215	0.00540008	0.0204046	OE9A024351	ID=OE9A024351T1;Parent=OE9A024351;Name=OE9A024351T1;product=OE9A024351P1;Description=PLASMODESMATA CALLOSE-BINDING PROTEIN 5-like isoform X1;Ontology_term=GO:0004553%2C GO:0005975%2C GO:0016021%2C GO:0030247%2C GO:0046658
OE9A001975	2.63443	3.03503	1.14244	2.65662	0.00789293	0.027885	OE9A001975	ID=OE9A001975T1;Parent=OE9A001975;Name=OE9A001975T1;product=OE9A001975P1;Description=agamous-like MADS-box AGL62;Ontology_term=GO:0003677%2C GO:0046983
OE9A003170	4.98637	3.03482	1.18825	2.55402	0.0106487	0.035679	OE9A003170	ID=OE9A003170T1;Parent=OE9A003170;Name=OE9A003170T1;product=OE9A003170P1
OE9A097347	44.1901	3.03448	0.455898	6.65604	2.81301e-11	9.34613e-10	OE9A097347	ID=OE9A097347T2;Parent=OE9A097347;Name=OE9A097347T2;product=OE9A097347P2;Description=G-type lectin S-receptor-like serine threonine- kinase At4g27290 isoform X1;Ontology_term=GO:0004674%2C GO:0005524%2C GO:0006468%2C GO:0009069%2C GO:0016020%2C GO:0048544
OE9A097143	4.37962	3.03395	1.23105	2.46453	0.0137195	0.0438343	OE9A097143	ID=OE9A097143T1;Parent=OE9A097143;Name=OE9A097143T1;product=OE9A097143P1;Description=2-methylbutanal oxime monooxygenase-like;Ontology_term=GO:0004497%2C GO:0005506%2C GO:0016020%2C GO:0016705%2C GO:0020037%2C GO:0055114
OE9A031653	33.4887	3.03266	0.475644	6.3759	1.81897e-10	5.03947e-09	OE9A031653	ID=OE9A031653T1;Parent=OE9A031653;Name=OE9A031653T1;product=OE9A031653P1
OE9A069382	53.2748	3.03202	0.504906	6.00511	1.91198e-09	4.23847e-08	OE9A069382	ID=OE9A069382T1;Parent=OE9A069382;Name=OE9A069382T1;product=OE9A069382P1;Description=receptor-like serine threonine- kinase SD1-8;Ontology_term=GO:0004674%2C GO:0005524%2C GO:0005886%2C GO:0006468%2C GO:0009069%2C GO:0009506%2C GO:0031625%2C GO:0045087%2C GO:0048544
OE9A003448	87.8102	3.02945	0.528817	5.72874	1.01182e-08	1.9308e-07	OE9A003448	ID=OE9A003448T1;Parent=OE9A003448;Name=OE9A003448T1;product=OE9A003448P1
OE9A037160	64.3358	3.02936	0.345752	8.76166	1.92393e-18	2.60415e-16	OE9A037160	ID=OE9A037160T1;Parent=OE9A037160;Name=OE9A037160T1;product=OE9A037160P1;Description=probable polyamine transporter At3g13620;Ontology_term=GO:0003333%2C GO:0005887%2C GO:0015179%2C GO:0015203%2C GO:0015297%2C GO:0015807%2C GO:1902047
OE9A087678	3.45175	3.02637	1.25985	2.40216	0.0162985	0.0503325	OE9A087678	ID=OE9A087678T1;Parent=OE9A087678;Name=OE9A087678T1;product=OE9A087678P1;Description=actin-7;Ontology_term=GO:0005524
OE9A108041	3.47872	3.02539	1.1459	2.6402	0.00828575	0.028992	OE9A108041	ID=OE9A108041T1;Parent=OE9A108041;Name=OE9A108041T1;product=OE9A108041P1;Description=heparan-alpha-glucosaminide N-acetyltransferase-like;Ontology_term=GO:0016021
OE9A102590	434.499	3.02388	0.635657	4.7571	1.96396e-06	2.12811e-05	OE9A102590	ID=OE9A102590T1;Parent=OE9A102590;Name=OE9A102590T1;product=OE9A102590P1;Description=syntaxin-121-like;Ontology_term=GO:0000149%2C GO:0005484%2C GO:0005886%2C GO:0006886%2C GO:0006887%2C GO:0006906%2C GO:0012505%2C GO:0016021%2C GO:0031201%2C GO:0048278
OE9A053162	15.552	3.02216	0.630472	4.79349	1.63908e-06	1.81298e-05	OE9A053162	ID=OE9A053162T1;Parent=OE9A053162;Name=OE9A053162T1;product=OE9A053162P1
OE9A066969	3.53383	3.022	1.16049	2.60407	0.00921242	0.0315685	OE9A066969	ID=OE9A066969T1;Parent=OE9A066969;Name=OE9A066969T1;product=OE9A066969P1;Description=alpha carbonic anhydrase 7;Ontology_term=GO:0004089%2C GO:0006730%2C GO:0006807%2C GO:0008270
OE9A036887	9.24517	3.02172	0.731433	4.13122	3.60835e-05	0.000280042	OE9A036887	ID=OE9A036887T1;Parent=OE9A036887;Name=OE9A036887T1;product=OE9A036887P1;Description=GATA transcription factor 25-like;Ontology_term=GO:0003700%2C GO:0005515%2C GO:0005667%2C GO:0006355%2C GO:0008270%2C GO:0043565%2C GO:0045449
OE9A052275	964.071	3.02055	0.290706	10.3904	2.74216e-25	1.06824e-22	OE9A052275	ID=OE9A052275T1;Parent=OE9A052275;Name=OE9A052275T1;product=OE9A052275P1;Description=GABA transporter 1-like;Ontology_term=GO:0005886%2C GO:0015185%2C GO:0015812%2C GO:0016021
OE9A015150	10.7482	3.01942	0.672503	4.48983	7.12799e-06	6.69499e-05	OE9A015150	ID=OE9A015150T1;Parent=OE9A015150;Name=OE9A015150T1;product=OE9A015150P1;Description=G-type lectin S-receptor-like serine threonine- kinase LECRK3;Ontology_term=GO:0004674%2C GO:0005524%2C GO:0005886%2C GO:0006468%2C GO:0009069
OE9A029817	19.8802	3.01524	0.57895	5.20811	1.90771e-07	2.68221e-06	OE9A029817	ID=OE9A029817T1;Parent=OE9A029817;Name=OE9A029817T1;product=OE9A029817P1;Description=probable F-box At2g36090;Ontology_term=GO:0005515%2C GO:0016020
OE9A120409	1.9091	3.01291	1.20351	2.50344	0.0122992	0.0401203	OE9A120409	ID=OE9A120409T1;Parent=OE9A120409;Name=OE9A120409T1;product=OE9A120409P1
OE9A032769	13.0957	3.01247	0.81125	3.71337	0.000204514	0.00126586	OE9A032769	ID=OE9A032769T1;Parent=OE9A032769;Name=OE9A032769T1;product=OE9A032769P1;Description=ECERIFERUM 1-like;Ontology_term=GO:0005506%2C GO:0006633%2C GO:0016021%2C GO:0016491%2C GO:0055114
OE9A118138	1.60458	3.01216	1.36928	2.19981	0.0278207	0.0772249	OE9A118138	ID=OE9A118138T1;Parent=OE9A118138;Name=OE9A118138T1;product=OE9A118138P1;Description=50S ribosomal L3, chloroplastic;Ontology_term=GO:0003735%2C GO:0005840%2C GO:0006412%2C GO:0042254
OE9pt000037	15.3579	3.01093	0.830295	3.62634	0.000287468	0.00169739	OE9pt000037	ID=OE9pt000037T1;Parent=OE9pt000037;product=OE9pt000037P1;Description=psbF
OE9A003895	8.3195	3.00967	0.772581	3.89561	9.79527e-05	0.000670884	OE9A003895	ID=OE9A003895T1;Parent=OE9A003895;Name=OE9A003895T1;product=OE9A003895P1;Description=transcription factor GTE12-like isoform X2;Ontology_term=GO:0005515
OE9A117362	51.6788	3.00933	0.55662	5.40644	6.42893e-08	1.02683e-06	OE9A117362	ID=OE9A117362T1;Parent=OE9A117362;Name=OE9A117362T1;product=OE9A117362P1
OE9A027932	11.6313	3.0079	0.542508	5.54444	2.94896e-08	5.10301e-07	OE9A027932	ID=OE9A027932T1;Parent=OE9A027932;Name=OE9A027932T1;product=OE9A027932P1;Description=aluminum-activated malate transporter 9-like;Ontology_term=GO:0009705%2C GO:0015140%2C GO:0015743
OE9A010646	35.5982	3.00665	0.965299	3.11473	0.00184112	0.00833161	OE9A010646	ID=OE9A010646T1;Parent=OE9A010646;Name=OE9A010646T1;product=OE9A010646P1;Description=ethylene-responsive transcription factor ABR1-like;Ontology_term=GO:0003677%2C GO:0003700%2C GO:0005667%2C GO:0006355%2C GO:0045449
OE9A017894	19.5977	3.00622	0.604994	4.96902	6.72934e-07	8.19215e-06	OE9A017894	ID=OE9A017894T1;Parent=OE9A017894;Name=OE9A017894T1;product=OE9A017894P1;Description=LRR receptor-like serine threonine- kinase FLS2;Ontology_term=GO:0005515%2C GO:0016021
OE9A048789	3.07471	3.00551	1.43282	2.09762	0.0359388	0.0942089	OE9A048789	ID=OE9A048789T1;Parent=OE9A048789;Name=OE9A048789T1;product=OE9A048789P1
OE9A025860	2.79863	3.00537	1.28043	2.34716	0.0189173	0.0567948	OE9A025860	ID=OE9A025860T1;Parent=OE9A025860;Name=OE9A025860T1;product=OE9A025860P1
OE9A105972	8.63899	3.00456	0.82138	3.65793	0.000254257	0.00152554	OE9A105972	ID=OE9A105972T1;Parent=OE9A105972;Name=OE9A105972T1;product=OE9A105972P1;Description=ER lumen -retaining receptor;Ontology_term=GO:0005783%2C GO:0006621%2C GO:0016021%2C GO:0046923
OE9A121834	23.4512	2.99699	0.511068	5.86417	4.51386e-09	9.22091e-08	OE9A121834	ID=OE9A121834T1;Parent=OE9A121834;Name=OE9A121834T1;product=OE9A121834P1
OE9A072771	7.13894	2.99542	0.817797	3.66279	0.000249483	0.00150254	OE9A072771	ID=OE9A072771T1;Parent=OE9A072771;Name=OE9A072771T1;product=OE9A072771P1
OE9A105096	13.5272	2.99241	0.645889	4.63302	3.60378e-06	3.64676e-05	OE9A105096	ID=OE9A105096T1;Parent=OE9A105096;Name=OE9A105096T1;product=OE9A105096P1;Description=cell division control 6 homolog B;Ontology_term=GO:0006270%2C GO:0051301
OE9A011434	8.21493	2.99069	0.844192	3.54266	0.000396109	0.00223477	OE9A011434	ID=OE9A011434T1;Parent=OE9A011434;Name=OE9A011434T1;product=OE9A011434P1;Description=NUCLEAR FUSION DEFECTIVE 4-like;Ontology_term=GO:0016021
OE9A101648	67.1018	2.98982	0.410047	7.29142	3.06704e-13	1.54533e-11	OE9A101648	ID=OE9A101648T2;Parent=OE9A101648;Name=OE9A101648T2;product=OE9A101648P2;Description=fatty-acid-binding 2;Ontology_term=GO:0016872
OE9A023056	3.69682	2.98841	0.848503	3.52197	0.000428348	0.00239134	OE9A023056	ID=OE9A023056T1;Parent=OE9A023056;Name=OE9A023056T1;product=OE9A023056P1
OE9A080771	8.39684	2.98834	0.837101	3.56987	0.000357164	0.00204247	OE9A080771	ID=OE9A080771T1;Parent=OE9A080771;Name=OE9A080771T1;product=OE9A080771P1
OE9pt000006	440.886	2.98422	0.300255	9.93894	2.81818e-23	8.184e-21	OE9pt000006	ID=OE9pt000006T1;Parent=OE9pt000006;product=OE9pt000006P1;Description=atpA
OE9A014921	2.30846	2.98393	1.38118	2.16042	0.0307403	0.0834298	OE9A014921	ID=OE9A014921T1;Parent=OE9A014921;Name=OE9A014921T1;product=OE9A014921P1
OE9A121533	6.27686	2.98364	0.907935	3.28619	0.00101553	0.0050365	OE9A121533	ID=OE9A121533T1;Parent=OE9A121533;Name=OE9A121533T1;product=OE9A121533P1
OE9A007454	8.9372	2.98308	0.848375	3.51623	0.000437728	0.00243306	OE9A007454	ID=OE9A007454T1;Parent=OE9A007454;Name=OE9A007454T1;product=OE9A007454P1
OE9A106281	93.735	2.98184	0.442608	6.73698	1.61707e-11	5.68895e-10	OE9A106281	ID=OE9A106281T1;Parent=OE9A106281;Name=OE9A106281T1;product=OE9A106281P1;Description=Serine threonine kinase;Ontology_term=GO:0004672%2C GO:0005509%2C GO:0005515%2C GO:0005524%2C GO:0006468%2C GO:0030247
OE9A076060	3.07481	2.98115	1.15598	2.5789	0.00991162	0.0335678	OE9A076060	ID=OE9A076060T1;Parent=OE9A076060;Name=OE9A076060T1;product=OE9A076060P1
OE9A038537	3.87085	2.98052	1.39382	2.13837	0.0324864	0.0871176	OE9A038537	ID=OE9A038537T1;Parent=OE9A038537;Name=OE9A038537T1;product=OE9A038537P1
OE9A016377	559.225	2.97577	0.314618	9.45835	3.12837e-21	6.44727e-19	OE9A016377	ID=OE9A016377T1;Parent=OE9A016377;Name=OE9A016377T1;product=OE9A016377P1;Description=E3 ubiquitin- ligase ATL31-like;Ontology_term=GO:0005515%2C GO:0008270
OE9A116992	4.23351	2.97509	1.07411	2.76982	0.00560871	0.0210435	OE9A116992	ID=OE9A116992T1;Parent=OE9A116992;Name=OE9A116992T1;product=OE9A116992P1;Description=aldehyde oxidase GLOX;Ontology_term=GO:0016021
OE9A071858	6.94148	2.97467	0.670335	4.43758	9.09752e-06	8.3195e-05	OE9A071858	ID=OE9A071858T1;Parent=OE9A071858;Name=OE9A071858T1;product=OE9A071858P1;Description=anthocyanidin 3-O-glucosyltransferase 2-like;Ontology_term=GO:0008152%2C GO:0016020%2C GO:0016758
OE9pt000072	81.8424	2.9746	0.443403	6.70858	1.96521e-11	6.74292e-10	OE9pt000072	ID=OE9pt000072T1;Parent=OE9pt000072;product=OE9pt000072P1;Description=psaC
OE9A085713	5.59346	2.97362	1.13051	2.63034	0.00852984	0.029659	OE9A085713	ID=OE9A085713T1;Parent=OE9A085713;Name=OE9A085713T1;product=OE9A085713P1;Description=probable pectinesterase pectinesterase inhibitor 17;Ontology_term=GO:0005576%2C GO:0005618%2C GO:0005982%2C GO:0005985%2C GO:0030599%2C GO:0042545%2C GO:0043086%2C GO:0045330%2C GO:0045490%2C GO:0046910
OE9A060678	4.74268	2.9704	1.17805	2.52146	0.011687	0.038496	OE9A060678	ID=OE9A060678T1;Parent=OE9A060678;Name=OE9A060678T1;product=OE9A060678P1;Description=L-ascorbate oxidase homolog;Ontology_term=GO:0005507%2C GO:0006118%2C GO:0008447%2C GO:0019852%2C GO:0055114
OE9A101977	10.9669	2.97032	0.884027	3.35999	0.000779467	0.00401926	OE9A101977	ID=OE9A101977T1;Parent=OE9A101977;Name=OE9A101977T1;product=OE9A101977P1;Description=piriformospora indica-insensitive 2-like;Ontology_term=GO:0005515%2C GO:0016021
OE9A044507	9.13924	2.96784	0.822699	3.60744	0.000309231	0.00180619	OE9A044507	ID=OE9A044507T1;Parent=OE9A044507;Name=OE9A044507T1;product=OE9A044507P1;Description=WAT1-related At1g25270-like;Ontology_term=GO:0016021
OE9A020296	198.242	2.96607	0.652718	4.54419	5.51477e-06	5.33184e-05	OE9A020296	ID=OE9A020296T1;Parent=OE9A020296;Name=OE9A020296T1;product=OE9A020296P1;md5=8c55b437659f2fc0f45d8d50ac667415;INTERPRO=<table><tr><th>DB</th><th>ID</th><th>Description</th></tr><tr><td>PANTHER</td><td>PTHR31719</td><td></td></tr><tr><td>PANTHER</td><td>PTHR31719:SF5</td><td></td></tr><tr><td>Pfam</td><td>PF02365</td><td>No apical meristem (NAM) protein</td></tr><tr><td>ProSiteProfiles</td><td>PS5…
OE9A092146	3.6062	2.96587	1.13319	2.61727	0.00886359	0.0306127	OE9A092146	ID=OE9A092146T1;Parent=OE9A092146;Name=OE9A092146T1;product=OE9A092146P1
OE9A004876	6.23185	2.96225	1.10016	2.69257	0.0070904	0.0255494	OE9A004876	ID=OE9A004876T1;Parent=OE9A004876;Name=OE9A004876T1;product=OE9A004876P1;Description=zinc finger 10-like;Ontology_term=GO:0046872
OE9A050817	10.3064	2.96014	0.659776	4.48658	7.23749e-06	6.78188e-05	OE9A050817	ID=OE9A050817T1;Parent=OE9A050817;Name=OE9A050817T1;product=OE9A050817P1;Description=DNA replication licensing factor MCM4;Ontology_term=GO:0000347%2C GO:0003677%2C GO:0003678%2C GO:0005524%2C GO:0005657%2C GO:0005829%2C GO:0006270%2C GO:0032508%2C GO:0042555
OE9A113529	2.83996	2.9591	1.40904	2.10009	0.035721	0.0937996	OE9A113529	ID=OE9A113529T1;Parent=OE9A113529;Name=OE9A113529T1;product=OE9A113529P1;Description=tryptophan--tRNA ligase, cytoplasmic;Ontology_term=GO:0004830%2C GO:0005524%2C GO:0005829%2C GO:0006436%2C GO:0006568
OE9A037189	1.99145	2.95529	1.34156	2.20287	0.0276037	0.076714	OE9A037189	ID=OE9A037189T1;Parent=OE9A037189;Name=OE9A037189T1;product=OE9A037189P1
OE9A073102	6.13956	2.95436	0.770999	3.83186	0.000127177	0.000841629	OE9A073102	ID=OE9A073102T1;Parent=OE9A073102;Name=OE9A073102T1;product=OE9A073102P1
OE9A095245	49.3711	2.95419	0.630476	4.68566	2.79058e-06	2.90177e-05	OE9A095245	ID=OE9A095245T1;Parent=OE9A095245;Name=OE9A095245T1;product=OE9A095245P1;Description=major allergen Pru ar 1-like;Ontology_term=GO:0006952%2C GO:0009607
OE9A060138	10.2	2.95232	0.769671	3.83582	0.000125145	0.000830417	OE9A060138	ID=OE9A060138T1;Parent=OE9A060138;Name=OE9A060138T1;product=OE9A060138P1;Description=probable LRR receptor-like serine threonine- kinase At3g47570;Ontology_term=GO:0004672%2C GO:0005515%2C GO:0005524%2C GO:0006468
OE9mt000015	278.072	2.95206	0.400489	7.37115	1.69166e-13	9.06682e-12	OE9mt000015	ID=OE9mt000015T1;Parent=OE9mt000015;product=OE9mt000015P1;Description=nad7;Name=OE9mt000015T1
OE9A116994	3.32068	2.95087	1.424	2.07224	0.0382429	0.0987974	OE9A116994	ID=OE9A116994T2;Parent=OE9A116994;Name=OE9A116994T2;product=OE9A116994P2;Description=fatty-acid-binding 1-like;Ontology_term=GO:0016872
OE9A097037	4.72115	2.94844	0.9955	2.96177	0.00305875	0.0127426	OE9A097037	ID=OE9A097037T1;Parent=OE9A097037;Name=OE9A097037T1;product=OE9A097037P1;Description=G-type lectin S-receptor-like serine threonine- kinase At4g03230 isoform X1;Ontology_term=GO:0004674%2C GO:0005524%2C GO:0006468%2C GO:0009069%2C GO:0048544
OE9A001257	3.46723	2.94787	1.26751	2.32573	0.0200331	0.0594683	OE9A001257	ID=OE9A001257T1;Parent=OE9A001257;Name=OE9A001257T1;product=OE9A001257P1;Description=transcription factor bHLH52;Ontology_term=GO:0003677%2C GO:0046983
OE9A115640	1.57443	2.94682	1.31747	2.23674	0.0253035	0.0715833	OE9A115640	ID=OE9A115640T1;Parent=OE9A115640;Name=OE9A115640T1;product=OE9A115640P1;Description=auxin transporter 4;Ontology_term=GO:0016021
OE9A069057	10.4804	2.94658	0.937322	3.14362	0.00166872	0.00765995	OE9A069057	ID=OE9A069057T1;Parent=OE9A069057;Name=OE9A069057T1;product=OE9A069057P1;Description=geranylgeranyl pyrophosphate synthase, chloroplastic-like;Ontology_term=GO:0004161%2C GO:0004311%2C GO:0004337%2C GO:0006694%2C GO:0009507%2C GO:0010319%2C GO:0016117%2C GO:0033384%2C GO:0033386%2C GO:0045337%2C GO:0046872
OE9A122026	5.35262	2.94471	1.28116	2.29847	0.0215348	0.063001	OE9A122026	ID=OE9A122026T1;Parent=OE9A122026;Name=OE9A122026T1;product=OE9A122026P1
OE9A070070	562.994	2.93513	0.346872	8.46171	2.63484e-17	3.06063e-15	OE9A070070	ID=OE9A070070T1;Parent=OE9A070070;Name=OE9A070070T1;product=OE9A070070P1
OE9A110578	2.61086	2.93294	1.10528	2.65357	0.00796447	0.0280872	OE9A110578	ID=OE9A110578T1;Parent=OE9A110578;Name=OE9A110578T1;product=OE9A110578P1;Description=probable fatty acyl- reductase 4 isoform X2;Ontology_term=GO:0010345%2C GO:0035336%2C GO:0043231%2C GO:0080019
OE9A002623	8.64928	2.93067	0.836652	3.50285	0.000460308	0.00254264	OE9A002623	ID=OE9A002623T1;Parent=OE9A002623;Name=OE9A002623T1;product=OE9A002623P1;Description=cation exchanger family;Ontology_term=GO:0016021
OE9A019532	6.85243	2.93065	0.845867	3.46467	0.000530877	0.00287527	OE9A019532	ID=OE9A019532T1;Parent=OE9A019532;Name=OE9A019532T1;product=OE9A019532P1;Description=trichome birefringence-like 39;Ontology_term=GO:0005794%2C GO:0016413%2C GO:0042967%2C GO:0071554
OE9A062828	93.1246	2.92938	0.543638	5.38847	7.1062e-08	1.12265e-06	OE9A062828	ID=OE9A062828T1;Parent=OE9A062828;Name=OE9A062828T1;product=OE9A062828P1
OE9A093473	3.07118	2.92921	1.02508	2.85754	0.00426938	0.0168198	OE9A093473	ID=OE9A093473T1;Parent=OE9A093473;Name=OE9A093473T1;product=OE9A093473P1;Description=E3 ubiquitin- ligase RING1-like;Ontology_term=GO:0005515%2C GO:0006511%2C GO:0008270%2C GO:0016567
OE9A120645	14.455	2.9284	0.837029	3.49856	0.000467777	0.00258166	OE9A120645	ID=OE9A120645T1;Parent=OE9A120645;Name=OE9A120645T1;product=OE9A120645P1;Description=EG45-like domain containing;Ontology_term=GO:0016020
OE9A096580	2.30022	2.92692	1.39637	2.09609	0.0360746	0.0944863	OE9A096580	ID=OE9A096580T1;Parent=OE9A096580;Name=OE9A096580T1;product=OE9A096580P1;Description=transport Sec61 subunit beta-like;Ontology_term=GO:0005784%2C GO:0006886%2C GO:0016021
OE9A005711	229.725	2.92577	0.453546	6.45088	1.11206e-10	3.21771e-09	OE9A005711	ID=OE9A005711T1;Parent=OE9A005711;Name=OE9A005711T1;product=OE9A005711P1;Description=tetraspanin-8-like;Ontology_term=GO:0016021
OE9mt000005	147.31	2.9247	0.411795	7.10232	1.2268e-12	5.47329e-11	OE9mt000005	ID=OE9mt000005T1;Parent=OE9mt000005;product=OE9mt000005P1;Description=nad2;Name=OE9mt000005T1
OE9mt000039	39.0817	2.92311	0.449702	6.50011	8.0263e-11	2.41651e-09	OE9mt000039	ID=OE9mt000039T1;Parent=OE9mt000039;product=OE9mt000039P1;Description=rps4;Name=OE9mt000039T1
OE9A013270	10.7411	2.92288	0.667934	4.376	1.20875e-05	0.000107018	OE9A013270	ID=OE9A013270T1;Parent=OE9A013270;Name=OE9A013270T1;product=OE9A013270P1;Description=DNA mismatch repair MSH5 isoform X2;Ontology_term=GO:0000710%2C GO:0000795%2C GO:0003684%2C GO:0005524%2C GO:0030983%2C GO:0032300%2C GO:0043073%2C GO:0051026
OE9A094524	12.3031	2.92249	0.718575	4.06706	4.76091e-05	0.000355832	OE9A094524	ID=OE9A094524T1;Parent=OE9A094524;Name=OE9A094524T1;product=OE9A094524P1;Description=zinc finger JAGGED-like isoform X2;Ontology_term=GO:0003677%2C GO:0010093%2C GO:0046872%2C GO:0048438%2C GO:0048827
OE9A017145	3.96448	2.92245	1.02688	2.84596	0.00442776	0.0173376	OE9A017145	ID=OE9A017145T1;Parent=OE9A017145;Name=OE9A017145T1;product=OE9A017145P1;md5=fd6ccdb47bf7f4298453ba8e0bf276c0;INTERPRO=<table><tr><th>DB</th><th>ID</th><th>Description</th></tr><tr><td>Gene3D</td><td>G3DSA:3.40.640.10</td><td></td></tr><tr><td>PANTHER</td><td>PTHR11999</td><td></td></tr><tr><td>PANTHER</td><td>PTHR11999:SF83</td><td></td></tr><tr><td>Pfam</td><td>PF00282</td><td>Pyridoxal-depende…
OE9A111232	10.6256	2.92201	0.690353	4.23264	2.30967e-05	0.000189576	OE9A111232	ID=OE9A111232T1;Parent=OE9A111232;Name=OE9A111232T1;product=OE9A111232P1;Description=ankyrin repeat-containing ITN1-like isoform X1;Ontology_term=GO:0016021
OE9A022494	6.58039	2.92057	0.957692	3.0496	0.00229149	0.0100054	OE9A022494	ID=OE9A022494T1;Parent=OE9A022494;Name=OE9A022494T1;product=OE9A022494P1
OE9A070569	5.30145	2.91854	1.1228	2.59935	0.00934005	0.0319313	OE9A070569	ID=OE9A070569T1;Parent=OE9A070569;Name=OE9A070569T1;product=OE9A070569P1;Description=ethylene-responsive transcription factor ABI4;Ontology_term=GO:0003677%2C GO:0003700%2C GO:0005667%2C GO:0006355%2C GO:0010033%2C GO:0045449%2C GO:0048731%2C GO:1901700
OE9A009027	6.94777	2.91739	0.867949	3.36125	0.000775913	0.00400416	OE9A009027	ID=OE9A009027T1;Parent=OE9A009027;Name=OE9A009027T1;product=OE9A009027P1;Description=beta-fructofuranosidase, insoluble isoenzyme 1-like;Ontology_term=GO:0004553%2C GO:0005975
OE9A116232	6.96743	2.91673	0.916167	3.18362	0.00145443	0.00683342	OE9A116232	ID=OE9A116232T1;Parent=OE9A116232;Name=OE9A116232T1;product=OE9A116232P1
OE9A027698	5.14208	2.91604	0.942394	3.09429	0.00197281	0.00881762	OE9A027698	ID=OE9A027698T1;Parent=OE9A027698;Name=OE9A027698T1;product=OE9A027698P1;Description=IRK-interacting;Ontology_term=GO:0006457
OE9A053282	653.713	2.91562	0.629078	4.63475	3.57366e-06	3.62288e-05	OE9A053282	ID=OE9A053282T1;Parent=OE9A053282;Name=OE9A053282T1;product=OE9A053282P1;Description=anthocyanidin 3-O-glucosyltransferase 2-like;Ontology_term=GO:0008152%2C GO:0016021%2C GO:0016758
OE9A090594	6.00123	2.9155	0.85919	3.39331	0.000690524	0.00361668	OE9A090594	ID=OE9A090594T1;Parent=OE9A090594;Name=OE9A090594T1;product=OE9A090594P1
OE9A026146	2.02459	2.91466	1.27069	2.29376	0.0218041	0.0636605	OE9A026146	ID=OE9A026146T1;Parent=OE9A026146;Name=OE9A026146T1;product=OE9A026146P1;Description=serine threonine- kinase EDR1-like isoform X1;Ontology_term=GO:0004674%2C GO:0004715%2C GO:0005524%2C GO:0009069%2C GO:0018108
OE9A073838	9.52744	2.91432	1.00718	2.89355	0.00380909	0.0153092	OE9A073838	ID=OE9A073838T1;Parent=OE9A073838;Name=OE9A073838T1;product=OE9A073838P1;Description=ethylene-responsive transcription factor ERF027-like;Ontology_term=GO:0003677%2C GO:0003700%2C GO:0005667%2C GO:0006355%2C GO:0045449
OE9A019588	4.6668	2.91305	0.863222	3.37462	0.000739179	0.00384097	OE9A019588	ID=OE9A019588T1;Parent=OE9A019588;Name=OE9A019588T1;product=OE9A019588P1;Description=24-methylenesterol C-methyltransferase 2-like;Ontology_term=GO:0005737%2C GO:0006694%2C GO:0008757%2C GO:0016021%2C GO:0032259
OE9A069932	3.70622	2.91057	1.28131	2.27157	0.0231127	0.0666588	OE9A069932	ID=OE9A069932T1;Parent=OE9A069932;Name=OE9A069932T1;product=OE9A069932P1
OE9A119587	31.8561	2.91033	0.569649	5.109	3.23875e-07	4.30182e-06	OE9A119587	ID=OE9A119587T1;Parent=OE9A119587;Name=OE9A119587T1;product=OE9A119587P1;Description=probable WRKY transcription factor 50;Ontology_term=GO:0003700%2C GO:0005667%2C GO:0006355%2C GO:0043565%2C GO:0045449%2C GO:0050896
OE9A076251	22.5209	2.90863	0.83248	3.49394	0.000475952	0.0026227	OE9A076251	ID=OE9A076251T1;Parent=OE9A076251;Name=OE9A076251T1;product=OE9A076251P1;Description=shikimate O-hydroxycinnamoyltransferase-like;Ontology_term=GO:0016747
OE9A083492	3.90079	2.90709	1.38835	2.09391	0.0362678	0.0948455	OE9A083492	ID=OE9A083492T1;Parent=OE9A083492;Name=OE9A083492T1;product=OE9A083492P1
OE9A107234	8.43235	2.90642	0.955277	3.04248	0.00234635	0.0102032	OE9A107234	ID=OE9A107234T1;Parent=OE9A107234;Name=OE9A107234T1;product=OE9A107234P1;Description=zinc finger CCCH domain-containing 39-like;Ontology_term=GO:0046872
OE9A036630	7.4669	2.90468	0.996682	2.91435	0.00356429	0.0145171	OE9A036630	ID=OE9A036630T1;Parent=OE9A036630;Name=OE9A036630T1;product=OE9A036630P1;Description=L-ascorbate oxidase homolog;Ontology_term=GO:0005507%2C GO:0009505%2C GO:0009506%2C GO:0016722%2C GO:0055114
OE9A084413	9.64271	2.90447	0.609096	4.7685	1.85603e-06	2.02421e-05	OE9A084413	ID=OE9A084413T1;Parent=OE9A084413;Name=OE9A084413T1;product=OE9A084413P1;Description=40S ribosomal S14;Ontology_term=GO:0000028%2C GO:0000462%2C GO:0003735%2C GO:0006412%2C GO:0022627%2C GO:0048027%2C GO:0070181
OE9A107726	182.553	2.90381	0.320066	9.07254	1.16277e-19	1.88545e-17	OE9A107726	ID=OE9A107726T1;Parent=OE9A107726;Name=OE9A107726T1;product=OE9A107726P1;Description=glutamate receptor -like;Ontology_term=GO:0004970%2C GO:0006811%2C GO:0007165%2C GO:0007268%2C GO:0016020
OE9A037251	4.80393	2.90358	1.17264	2.4761	0.0132826	0.0427031	OE9A037251	ID=OE9A037251T1;Parent=OE9A037251;Name=OE9A037251T1;product=OE9A037251P1;Description=flavonoid 3 -monooxygenase-like;Ontology_term=GO:0004497%2C GO:0005506%2C GO:0016705%2C GO:0020037%2C GO:0055114
OE9A091826	8.54138	2.90069	0.741819	3.91024	9.2206e-05	0.000635201	OE9A091826	ID=OE9A091826T1;Parent=OE9A091826;Name=OE9A091826T1;product=OE9A091826P1;Description=Ubiquitin-- ligase;Ontology_term=GO:0005515%2C GO:0008270
OE9A068899	79.673	2.90058	0.57687	5.02813	4.95293e-07	6.24868e-06	OE9A068899	ID=OE9A068899T1;Parent=OE9A068899;Name=OE9A068899T1;product=OE9A068899P1;Description=transcription factor JUNGBRUNNEN 1-like;Ontology_term=GO:0003677%2C GO:0006355
OE9A100031	156.919	2.90033	0.365694	7.93105	2.17306e-15	1.73108e-13	OE9A100031	ID=OE9A100031T1;Parent=OE9A100031;Name=OE9A100031T1;product=OE9A100031P1;Description=calmodulin-binding 60 C;Ontology_term=GO:0005516%2C GO:0006950%2C GO:0009617%2C GO:0050789
OE9A078640	4.2677	2.89924	0.962847	3.01111	0.00260297	0.0111371	OE9A078640	ID=OE9A078640T1;Parent=OE9A078640;Name=OE9A078640T1;product=OE9A078640P1;Description=UDP-glucose iridoid glucosyltransferase-like;Ontology_term=GO:0035251%2C GO:1900994
OE9A074848	1.61388	2.89817	1.33932	2.16391	0.0304716	0.0828835	OE9A074848	ID=OE9A074848T1;Parent=OE9A074848;Name=OE9A074848T1;product=OE9A074848P1;Description=ankyrin repeat-containing BDA1-like;Ontology_term=GO:0005515%2C GO:0016020
OE9A028891	309.196	2.89809	0.317572	9.12577	7.12257e-20	1.20383e-17	OE9A028891	ID=OE9A028891T1;Parent=OE9A028891;Name=OE9A028891T1;product=OE9A028891P1;Description=LRR receptor-like serine threonine- kinase GSO1;Ontology_term=GO:0005515
OE9A037485	5.64824	2.8972	1.09836	2.63776	0.0083456	0.0291485	OE9A037485	ID=OE9A037485T1;Parent=OE9A037485;Name=OE9A037485T1;product=OE9A037485P1
OE9A025067	14.4398	2.89635	0.647905	4.47034	7.80969e-06	7.2669e-05	OE9A025067	ID=OE9A025067T1;Parent=OE9A025067;Name=OE9A025067T1;product=OE9A025067P1;Description=probable LRR receptor-like serine threonine- kinase At3g47570;Ontology_term=GO:0004672%2C GO:0005515%2C GO:0005524%2C GO:0006468%2C GO:0016020
OE9pt000076	74.0093	2.89619	0.307307	9.42443	4.32435e-21	8.63357e-19	OE9pt000076	ID=OE9pt000076T1;Parent=OE9pt000076;product=OE9pt000076P1;Description=ndhA
OE9A000829	10.8534	2.89373	0.916672	3.15678	0.0015952	0.00737442	OE9A000829	ID=OE9A000829T1;Parent=OE9A000829;Name=OE9A000829T1;product=OE9A000829P1;Description=premnaspirodiene oxygenase-like;Ontology_term=GO:0004497%2C GO:0005506%2C GO:0016021%2C GO:0016705%2C GO:0020037%2C GO:0055114
OE9A117463	5.79479	2.89252	0.745323	3.88089	0.000104075	0.000707357	OE9A117463	ID=OE9A117463T2;Parent=OE9A117463;Name=OE9A117463T2;product=OE9A117463P1
OE9A110194	4.74058	2.88821	1.04791	2.75617	0.00584826	0.0217964	OE9A110194	ID=OE9A110194T1;Parent=OE9A110194;Name=OE9A110194T1;product=OE9A110194P1;Description=probable disease resistance RPP8 2;Ontology_term=GO:0043531
OE9A013152	256.839	2.88729	0.37907	7.61676	2.60127e-14	1.64219e-12	OE9A013152	ID=OE9A013152T1;Parent=OE9A013152;Name=OE9A013152T1;product=OE9A013152P1;Description=aldose 1-epimerase-like;Ontology_term=GO:0004034%2C GO:0006094%2C GO:0006096%2C GO:0030246
OE9A007364	5.73266	2.88578	1.26508	2.28111	0.0225417	0.0653718	OE9A007364	ID=OE9A007364T1;Parent=OE9A007364;Name=OE9A007364T1;product=OE9A007364P1;Description=serine threonine- kinase SRK2A-like;Ontology_term=GO:0004674%2C GO:0005524%2C GO:0005634%2C GO:0005737%2C GO:0006468%2C GO:0009069%2C GO:0035556
OE9A090970	11.2135	2.88559	0.724615	3.98224	6.82681e-05	0.000489288	OE9A090970	ID=OE9A090970T1;Parent=OE9A090970;Name=OE9A090970T1;product=OE9A090970P1;Description=receptor kinase At3g47110;Ontology_term=GO:0004672%2C GO:0005515%2C GO:0005524%2C GO:0006468
OE9A061149	16.3021	2.88515	0.507279	5.6875	1.28913e-08	2.40818e-07	OE9A061149	ID=OE9A061149T1;Parent=OE9A061149;Name=OE9A061149T1;product=OE9A061149P1;Description=aspartic ase 2;Ontology_term=GO:0004190%2C GO:0006508%2C GO:0016021%2C GO:0030163
OE9A088121	5.92862	2.88444	1.06542	2.70733	0.00678274	0.0246185	OE9A088121	ID=OE9A088121T1;Parent=OE9A088121;Name=OE9A088121T1;product=OE9A088121P1;Description=sugar transport 8-like;Ontology_term=GO:0005351%2C GO:0005355%2C GO:0005887%2C GO:0015992%2C GO:0046323%2C GO:1904659
OE9A098592	4.42644	2.88366	1.15021	2.50708	0.0121734	0.0398102	OE9A098592	ID=OE9A098592T1;Parent=OE9A098592;Name=OE9A098592T1;product=OE9A098592P1
OE9A110781	523.406	2.88138	0.39808	7.23819	4.54721e-13	2.20085e-11	OE9A110781	ID=OE9A110781T1;Parent=OE9A110781;Name=OE9A110781T1;product=OE9A110781P1
OE9A070390	69.7545	2.88109	0.366661	7.85763	3.91471e-15	2.91496e-13	OE9A070390	ID=OE9A070390T1;Parent=OE9A070390;Name=OE9A070390T1;product=OE9A070390P1;Description=lysine histidine transporter-like 8;Ontology_term=GO:0016021
OE9A046853	95.1087	2.88095	1.04321	2.76163	0.00575129	0.0214901	OE9A046853	ID=OE9A046853T1;Parent=OE9A046853;Name=OE9A046853T1;product=OE9A046853P1;Description=butyrate-- ligase AAE11, peroxisomal-like;Ontology_term=GO:0008152%2C GO:0016874
OE9A089177	13.0981	2.88046	0.868184	3.3178	0.000907304	0.00457866	OE9A089177	ID=OE9A089177T1;Parent=OE9A089177;Name=OE9A089177T1;product=OE9A089177P1;Description=ase inhibitor-like;Ontology_term=GO:0004867%2C GO:0008233%2C GO:0009611%2C GO:0010951
OE9A026994	23.3811	2.87849	0.508282	5.66318	1.4859e-08	2.74368e-07	OE9A026994	ID=OE9A026994T1;Parent=OE9A026994;Name=OE9A026994T1;product=OE9A026994P1
OE9A105690	11.5591	2.87771	0.706217	4.07482	4.60509e-05	0.000345804	OE9A105690	ID=OE9A105690T1;Parent=OE9A105690;Name=OE9A105690T1;product=OE9A105690P1;Description=GDSL esterase lipase At5g45910;Ontology_term=GO:0016788
OE9A014358	4.96881	2.87664	0.946989	3.03767	0.00238415	0.0103435	OE9A014358	ID=OE9A014358T1;Parent=OE9A014358;Name=OE9A014358T1;product=OE9A014358P1;Description=UBN2 domain-containing , partial;Ontology_term=GO:0003676%2C GO:0008270
OE9A091771	9.44408	2.87518	0.85142	3.37693	0.000733008	0.00381169	OE9A091771	ID=OE9A091771T1;Parent=OE9A091771;Name=OE9A091771T1;product=OE9A091771P1
OE9A017734	8.58599	2.87179	0.681621	4.21318	2.51805e-05	0.000204205	OE9A017734	ID=OE9A017734T1;Parent=OE9A017734;Name=OE9A017734T1;product=OE9A017734P1
OE9A104251	192.299	2.87024	0.475485	6.03645	1.57544e-09	3.54908e-08	OE9A104251	ID=OE9A104251T1;Parent=OE9A104251;Name=OE9A104251T1;product=OE9A104251P1
OE9A114561	6.19262	2.87023	0.866427	3.31272	0.000923944	0.00465161	OE9A114561	ID=OE9A114561T1;Parent=OE9A114561;Name=OE9A114561T1;product=OE9A114561P1;Description=omega-hydroxypalmitate O-feruloyl transferase;Ontology_term=GO:0016747
OE9A019594	2.76303	2.86977	1.03747	2.76612	0.00567282	0.0212441	OE9A019594	ID=OE9A019594T1;Parent=OE9A019594;Name=OE9A019594T1;product=OE9A019594P1;Description=external alternative NAD(P)H-ubiquinone oxidoreductase B2, mitochondrial-like;Ontology_term=GO:0005509%2C GO:0016491%2C GO:0055114
OE9A040457	57.0537	2.86967	0.861917	3.32941	0.000870305	0.00441496	OE9A040457	ID=OE9A040457T1;Parent=OE9A040457;Name=OE9A040457T1;product=OE9A040457P1;Description=endochitinase EP3-like;Ontology_term=GO:0004568%2C GO:0005975%2C GO:0006032%2C GO:0008061%2C GO:0016998
OE9pt000061	347.703	2.86628	0.274645	10.4363	1.69265e-25	6.75876e-23	OE9pt000061	ID=OE9pt000061T1;Parent=OE9pt000061;product=OE9pt000061P1;Description=rpl2
OE9A066080	5.48524	2.86522	1.26362	2.26747	0.0233613	0.0672316	OE9A066080	ID=OE9A066080T1;Parent=OE9A066080;Name=OE9A066080T1;product=OE9A066080P1;Description=AT-hook motif nuclear-localized 16;Ontology_term=GO:0000785%2C GO:0005634%2C GO:0010208%2C GO:0010228%2C GO:0010529%2C GO:0031490%2C GO:0035067%2C GO:1900111
OE9A085227	22.2299	2.86486	0.639131	4.48244	7.37951e-06	6.90888e-05	OE9A085227	ID=OE9A085227T1;Parent=OE9A085227;Name=OE9A085227T1;product=OE9A085227P1;Description=uncharacterized LOC107803974;Ontology_term=GO:0035556
OE9A113676	1.9712	2.86224	1.37439	2.08255	0.0372918	0.0969206	OE9A113676	ID=OE9A113676T1;Parent=OE9A113676;Name=OE9A113676T1;product=OE9A113676P1
OE9A062553	3.37182	2.86063	1.03973	2.75133	0.0059353	0.0220616	OE9A062553	ID=OE9A062553T1;Parent=OE9A062553;Name=OE9A062553T1;product=OE9A062553P1
OE9pt000014	15.5242	2.85986	0.769083	3.71854	0.000200379	0.00124386	OE9pt000014	ID=OE9pt000014T1;Parent=OE9pt000014;product=OE9pt000014P1;Description=petN
OE9A118437	4.69888	2.85939	1.09234	2.61768	0.00885291	0.0305826	OE9A118437	ID=OE9A118437T1;Parent=OE9A118437;Name=OE9A118437T1;product=OE9A118437P1;Description=ankyrin repeat-containing ITN1-like;Ontology_term=GO:0005515
OE9A068804	2.05601	2.85817	1.22288	2.33723	0.019427	0.058013	OE9A068804	ID=OE9A068804T1;Parent=OE9A068804;Name=OE9A068804T1;product=OE9A068804P1
OE9A003494	293.178	2.85576	0.441146	6.47349	9.57619e-11	2.8116e-09	OE9A003494	ID=OE9A003494T1;Parent=OE9A003494;Name=OE9A003494T1;product=OE9A003494P1;Description=NRT1 PTR FAMILY -like;Ontology_term=GO:0005215%2C GO:0006810%2C GO:0016021
OE9A056229	62.9809	2.85479	0.436765	6.53621	6.30954e-11	1.93811e-09	OE9A056229	ID=OE9A056229T1;Parent=OE9A056229;Name=OE9A056229T1;product=OE9A056229P1;Description=serine threonine- kinase At5g01020-like;Ontology_term=GO:0004672%2C GO:0005524%2C GO:0006468
OE9A014277	55.7897	2.85304	0.567742	5.02524	5.028e-07	6.3234e-06	OE9A014277	ID=OE9A014277T1;Parent=OE9A014277;Name=OE9A014277T1;product=OE9A014277P1;Description=leucine-rich repeat receptor-like serine threonine tyrosine- kinase SOBIR1;Ontology_term=GO:0004672%2C GO:0005515%2C GO:0005524%2C GO:0006468%2C GO:0016020%2C GO:0048518
OE9A056495	9.16286	2.85248	1.20639	2.36446	0.0180562	0.0546978	OE9A056495	ID=OE9A056495T1;Parent=OE9A056495;Name=OE9A056495T1;product=OE9A056495P1;Description=G-type lectin S-receptor-like serine threonine- kinase At4g27290 isoform X1;Ontology_term=GO:0004672%2C GO:0005198%2C GO:0005524%2C GO:0006468%2C GO:0019028
OE9A034157	5.77233	2.85243	0.882862	3.23089	0.00123406	0.0059584	OE9A034157	ID=OE9A034157T1;Parent=OE9A034157;Name=OE9A034157T1;product=OE9A034157P1
OE9A086480	123.407	2.85105	0.3206	8.89286	5.95566e-19	8.68711e-17	OE9A086480	ID=OE9A086480T1;Parent=OE9A086480;Name=OE9A086480T1;product=OE9A086480P1;Description=phosphatidylinositol transfer 1-like;Ontology_term=GO:0005622%2C GO:0006810
OE9A037760	4.07828	2.84955	1.1265	2.52955	0.0114209	0.0377514	OE9A037760	ID=OE9A037760T1;Parent=OE9A037760;Name=OE9A037760T1;product=OE9A037760P1;Description=DETOXIFICATION 21-like;Ontology_term=GO:0006855%2C GO:0015238%2C GO:0015297%2C GO:0016021
OE9A095575	36.4241	2.8487	0.630949	4.51495	6.3332e-06	6.02824e-05	OE9A095575	ID=OE9A095575T1;Parent=OE9A095575;Name=OE9A095575T1;product=OE9A095575P1;Description=leucine-rich repeat receptor-like serine threonine tyrosine- kinase SOBIR1;Ontology_term=GO:0004674%2C GO:0005515%2C GO:0005524%2C GO:0006468%2C GO:0009069%2C GO:0016020%2C GO:0048518
OE9A014050	6.43959	2.84758	0.902726	3.15442	0.00160818	0.00741936	OE9A014050	ID=OE9A014050T1;Parent=OE9A014050;Name=OE9A014050T1;product=OE9A014050P1;Description=NRT1 PTR FAMILY -like isoform X1;Ontology_term=GO:0005215%2C GO:0006810%2C GO:0016021
OE9mt000011	44.5121	2.84751	0.509399	5.58994	2.27153e-08	4.02673e-07	OE9mt000011	ID=OE9mt000011T1;Parent=OE9mt000011;product=OE9mt000011P1;Description=nad1;Name=OE9mt000011T1
OE9A091256	6.203	2.84717	0.851948	3.34195	0.000831921	0.0042513	OE9A091256	ID=OE9A091256T1;Parent=OE9A091256;Name=OE9A091256T1;product=OE9A091256P1;Description=BREAST CANCER SUSCEPTIBILITY 2 homolog B-like isoform X1;Ontology_term=GO:0000724
OE9A016506	59.7259	2.84656	0.294177	9.67634	3.80097e-22	9.1292e-20	OE9A016506	ID=OE9A016506T1;Parent=OE9A016506;Name=OE9A016506T1;product=OE9A016506P1;Description=G-type lectin S-receptor-like serine threonine- kinase LECRK3;Ontology_term=GO:0004674%2C GO:0005524%2C GO:0005886%2C GO:0006468%2C GO:0009069%2C GO:0016021%2C GO:0048544
OE9A047859	3.72734	2.84638	1.01068	2.81631	0.00485793	0.0187395	OE9A047859	ID=OE9A047859T1;Parent=OE9A047859;Name=OE9A047859T1;product=OE9A047859P1;Description=cytokinin dehydrogenase 5;Ontology_term=GO:0009690%2C GO:0016614%2C GO:0019139%2C GO:0050660%2C GO:0055114
OE9A094357	3.14248	2.84596	1.29019	2.20585	0.0273947	0.0762346	OE9A094357	ID=OE9A094357T1;Parent=OE9A094357;Name=OE9A094357T1;product=OE9A094357P1
OE9A113757	3.26175	2.84386	1.06739	2.66432	0.00771435	0.0273745	OE9A113757	ID=OE9A113757T1;Parent=OE9A113757;Name=OE9A113757T1;product=OE9A113757P1;Description=pectinesterase-like;Ontology_term=GO:0004857%2C GO:0005576%2C GO:0005618%2C GO:0005982%2C GO:0005985%2C GO:0016020%2C GO:0030599%2C GO:0042545%2C GO:0043086%2C GO:0045330%2C GO:0045490
OE9A088576	92.544	2.84363	0.385593	7.37471	1.64708e-13	8.88756e-12	OE9A088576	ID=OE9A088576T1;Parent=OE9A088576;Name=OE9A088576T1;product=OE9A088576P1
OE9A063105	5.99627	2.8428	0.979877	2.90118	0.00371758	0.0150056	OE9A063105	ID=OE9A063105T1;Parent=OE9A063105;Name=OE9A063105T1;product=OE9A063105P1;Description=serine threonine- kinase CDL1-like;Ontology_term=GO:0004674%2C GO:0005524%2C GO:0006468%2C GO:0009069
OE9A026604	4.29778	2.84252	1.15915	2.45225	0.0141965	0.0450589	OE9A026604	ID=OE9A026604T1;Parent=OE9A026604;Name=OE9A026604T1;product=OE9A026604P1;Description=Serine threonine- kinase PBS1;Ontology_term=GO:0004674%2C GO:0005524%2C GO:0006468%2C GO:0009069
OE9A018426	207.633	2.84205	0.470687	6.03808	1.55954e-09	3.52071e-08	OE9A018426	ID=OE9A018426T1;Parent=OE9A018426;Name=OE9A018426T1;product=OE9A018426P1;Description=late embryogenesis abundant At1g64065;Ontology_term=GO:0016020
OE9A089638	3.28246	2.8406	1.24418	2.28311	0.0224241	0.0651078	OE9A089638	ID=OE9A089638T1;Parent=OE9A089638;Name=OE9A089638T1;product=OE9A089638P1;Description=LEAF RUST 10 DISEASE-RESISTANCE LOCUS RECEPTOR-LIKE PROTEIN KINASE-like;Ontology_term=GO:0004672%2C GO:0005524%2C GO:0006468
OE9A017307	6.66579	2.84059	0.940146	3.02144	0.00251576	0.0108278	OE9A017307	ID=OE9A017307T1;Parent=OE9A017307;Name=OE9A017307T1;product=OE9A017307P1;Description=ABC transporter G family member 11-like;Ontology_term=GO:0005524%2C GO:0005886%2C GO:0016021%2C GO:0042626%2C GO:0055085
OE9A025568	5.12109	2.83954	0.913522	3.10834	0.00188138	0.00848136	OE9A025568	ID=OE9A025568T1;Parent=OE9A025568;Name=OE9A025568T1;product=OE9A025568P1;Description=probable E3 ubiquitin- ligase HIP1;Ontology_term=GO:0005515%2C GO:0008270
OE9A044477	95.1065	2.83877	0.754108	3.76441	0.000166944	0.00106042	OE9A044477	ID=OE9A044477T1;Parent=OE9A044477;Name=OE9A044477T1;product=OE9A044477P1;Description=bifunctional pinoresinol-lariciresinol reductase;Ontology_term=GO:0010283%2C GO:0010284%2C GO:0055114%2C GO:1902125%2C GO:1902131%2C GO:1902132%2C GO:1902138
OE9A115032	6.56671	2.83854	1.12775	2.517	0.0118359	0.0388939	OE9A115032	ID=OE9A115032T1;Parent=OE9A115032;Name=OE9A115032T1;product=OE9A115032P1
OE9A041403	146.283	2.83771	0.389338	7.28855	3.13303e-13	1.57361e-11	OE9A041403	ID=OE9A041403T1;Parent=OE9A041403;Name=OE9A041403T1;product=OE9A041403P1;Description=calmodulin-binding 60 C;Ontology_term=GO:0005516%2C GO:0006950%2C GO:0009617%2C GO:0050789
OE9A015439	9.11518	2.83745	0.865298	3.27916	0.00104115	0.00514926	OE9A015439	ID=OE9A015439T1;Parent=OE9A015439;Name=OE9A015439T1;product=OE9A015439P1;Description=Auxin response factor 17
OE9A056797	8.03819	2.83463	0.735693	3.853	0.000116679	0.000782204	OE9A056797	ID=OE9A056797T1;Parent=OE9A056797;Name=OE9A056797T1;product=OE9A056797P1
OE9A096577	10.087	2.83423	0.571383	4.9603	7.03833e-07	8.50349e-06	OE9A096577	ID=OE9A096577T1;Parent=OE9A096577;Name=OE9A096577T1;product=OE9A096577P1
OE9A035169	10.8098	2.83114	0.685987	4.12711	3.67357e-05	0.000284412	OE9A035169	ID=OE9A035169T1;Parent=OE9A035169;Name=OE9A035169T1;product=OE9A035169P1;Description=uncharacterized protein LOC111370544;Ontology_term=GO:0016021
OE9A066957	2372.52	2.83037	0.313575	9.02612	1.77872e-19	2.85525e-17	OE9A066957	ID=OE9A066957T1;Parent=OE9A066957;Name=OE9A066957T1;product=OE9A066957P1;Description=glucan endo-1,3-beta-glucosidase, acidic-like;Ontology_term=GO:0004553%2C GO:0005975
OE9pt000085	350.274	2.83015	0.269091	10.5175	7.1772e-26	3.18428e-23	OE9pt000085	ID=OE9pt000085T1;Parent=OE9pt000085;product=OE9pt000085P1;Description=rpl2
OE9A094839	11.1021	2.8289	0.895916	3.15755	0.001591	0.00735925	OE9A094839	ID=OE9A094839T1;Parent=OE9A094839;Name=OE9A094839T1;product=OE9A094839P1;Description=KH domain-containing At4g18375;Ontology_term=GO:0003723
OE9A012091	4.15448	2.82851	1.09622	2.58023	0.0098735	0.0334641	OE9A012091	ID=OE9A012091T1;Parent=OE9A012091;Name=OE9A012091T1;product=OE9A012091P1;Description=SNAP25 homologous SNAP30;Ontology_term=GO:0005515
OE9A074195	5.0042	2.82845	0.800066	3.53527	0.000407358	0.00228892	OE9A074195	ID=OE9A074195T1;Parent=OE9A074195;Name=OE9A074195T1;product=OE9A074195P1;Description=LEAF RUST 10 DISEASE-RESISTANCE LOCUS RECEPTOR-LIKE PROTEIN KINASE-like;Ontology_term=GO:0030247
OE9A051290	1015.95	2.82676	0.192846	14.6581	1.1952e-48	1.90897e-44	OE9A051290	ID=OE9A051290T1;Parent=OE9A051290;Name=OE9A051290T1;product=OE9A051290P1;Description=delta(12)-fatty-acid desaturase FAD2-like;Ontology_term=GO:0006629%2C GO:0016021%2C GO:0016717%2C GO:0055114
OE9A068282	15.5575	2.82565	0.549875	5.13871	2.76624e-07	3.73636e-06	OE9A068282	ID=OE9A068282T1;Parent=OE9A068282;Name=OE9A068282T1;product=OE9A068282P1;Description=probable inactive ATP-dependent zinc metalloprotease FTSHI 1, chloroplastic;Ontology_term=GO:0000166%2C GO:0004176%2C GO:0005739%2C GO:0006508%2C GO:0006510%2C GO:0008237%2C GO:0009941%2C GO:0010020%2C GO:0016020
OE9A115175	3.63858	2.82402	1.32018	2.13913	0.0324255	0.0869836	OE9A115175	ID=OE9A115175T1;Parent=OE9A115175;Name=OE9A115175T1;product=OE9A115175P1;md5=6d6364c87d463d860daf10df8818a2b0;INTERPRO=<table><tr><th>DB</th><th>ID</th><th>Description</th></tr><tr><td>Gene3D</td><td>G3DSA:1.10.8.270</td><td></td></tr><tr><td>PANTHER</td><td>PTHR22957</td><td></td></tr><tr><td>PANTHER</td><td>PTHR22957:SF276</td><td></td></tr><tr><td>Pfam</td><td>PF00566</td><td>Rab-GTPase-TBC do…
OE9A028387	4.60336	2.82235	0.876633	3.21954	0.00128398	0.00615385	OE9A028387	ID=OE9A028387T1;Parent=OE9A028387;Name=OE9A028387T1;product=OE9A028387P1;Description=cell division control 48 homolog C;Ontology_term=GO:0005524
OE9A047278	2.8744	2.82228	1.35415	2.08416	0.0371455	0.0966308	OE9A047278	ID=OE9A047278T1;Parent=OE9A047278;Name=OE9A047278T1;product=OE9A047278P1
OE9A078605	7.07005	2.82159	0.682443	4.13455	3.55649e-05	0.000276353	OE9A078605	ID=OE9A078605T1;Parent=OE9A078605;Name=OE9A078605T1;product=OE9A078605P1;Description=E3 ubiquitin- ligase RHA2A-like;Ontology_term=GO:0005515%2C GO:0008270%2C GO:0016020
OE9A026312	187.957	2.81884	0.319648	8.81856	1.15942e-18	1.63157e-16	OE9A026312	ID=OE9A026312T1;Parent=OE9A026312;Name=OE9A026312T1;product=OE9A026312P1;md5=a08612f77a7217d6e78a10ee545dac1f;INTERPRO=<table><tr><th>DB</th><th>ID</th><th>Description</th></tr><tr><td>Gene3D</td><td>G3DSA:1.10.510.10</td><td></td></tr><tr><td>Gene3D</td><td>G3DSA:2.60.120.200</td><td></td></tr><tr><td>Gene3D</td><td>G3DSA:3.30.200.20</td><td></td></tr><tr><td>PANTHER</td><td>PTHR27002</td><td></…
OE9A066357	4.38077	2.81872	0.917191	3.07321	0.00211769	0.0093565	OE9A066357	ID=OE9A066357T1;Parent=OE9A066357;Name=OE9A066357T1;product=OE9A066357P1
OE9A025146	239.002	2.81813	0.362631	7.77135	7.76555e-15	5.41622e-13	OE9A025146	ID=OE9A025146T1;Parent=OE9A025146;Name=OE9A025146T1;product=OE9A025146P1;Description=mitogen-activated kinase 3;Ontology_term=GO:0000165%2C GO:0004707%2C GO:0005524%2C GO:0005622%2C GO:0007178%2C GO:0009069
OE9A066090	2500.12	2.81765	0.488749	5.76503	8.16409e-09	1.58153e-07	OE9A066090	ID=OE9A066090T1;Parent=OE9A066090;Name=OE9A066090T1;product=OE9A066090P1;Description=beta-glucosidase-like;Ontology_term=GO:0004553%2C GO:0005975
OE9A117743	6.47279	2.81667	1.15743	2.43356	0.0149513	0.0469804	OE9A117743	ID=OE9A117743T1;Parent=OE9A117743;Name=OE9A117743T1;product=OE9A117743P1;Description=CASP PIMP1;Ontology_term=GO:0002229%2C GO:0005886%2C GO:0009409%2C GO:0009611%2C GO:0009651%2C GO:0009723%2C GO:0009737%2C GO:0009751%2C GO:0009753%2C GO:0016021%2C GO:0042742
OE9A114043	8.30371	2.81636	0.9178	3.0686	0.00215063	0.00948631	OE9A114043	ID=OE9A114043T1;Parent=OE9A114043;Name=OE9A114043T1;product=OE9A114043P1;Description=eukaryotic translation initiation factor 2 subunit alpha homolog;Ontology_term=GO:0003743%2C GO:0005840%2C GO:0006446
OE9A011870	1099.21	2.81602	0.211591	13.3088	2.05838e-40	8.2191e-37	OE9A011870	ID=OE9A011870T1;Parent=OE9A011870;Name=OE9A011870T1;product=OE9A011870P1;Description=delta(12)-fatty-acid desaturase FAD2-like;Ontology_term=GO:0006629%2C GO:0016021%2C GO:0016717%2C GO:0055114
OE9A111110	5.91262	2.81536	1.13629	2.47769	0.0132236	0.0425649	OE9A111110	ID=OE9A111110T1;Parent=OE9A111110;Name=OE9A111110T1;product=OE9A111110P1
OE9A039226	3.34371	2.81148	1.11389	2.52402	0.0116021	0.0382426	OE9A039226	ID=OE9A039226T1;Parent=OE9A039226;Name=OE9A039226T1;product=OE9A039226P1;Description=phospholipase D alpha 4;Ontology_term=GO:0004630%2C GO:0005509%2C GO:0005515%2C GO:0005886%2C GO:0006970%2C GO:0006995%2C GO:0009395%2C GO:0009791%2C GO:0016036%2C GO:0016049%2C GO:0045848%2C GO:0046470%2C GO:0048364%2C GO:0051301%2C GO:0051365%2C GO:0070290
OE9A017663	3.46053	2.80989	1.04078	2.69978	0.0069385	0.0250756	OE9A017663	ID=OE9A017663T1;Parent=OE9A017663;Name=OE9A017663T1;product=OE9A017663P1;Description=mitochondrial proton calcium exchanger -like;Ontology_term=GO:0005488%2C GO:0016020
OE9A015286	749.245	2.80924	0.334206	8.40571	4.25275e-17	4.70068e-15	OE9A015286	ID=OE9A015286T1;Parent=OE9A015286;Name=OE9A015286T1;product=OE9A015286P1;Description=G-type lectin S-receptor-like serine threonine- kinase At1g67520 isoform X1;Ontology_term=GO:0004672%2C GO:0005524%2C GO:0006468
OE9A076398	13.6353	2.80915	0.591604	4.74837	2.0506e-06	2.21075e-05	OE9A076398	ID=OE9A076398T1;Parent=OE9A076398;Name=OE9A076398T1;product=OE9A076398P1;Description=transcription factor GTE12-like;Ontology_term=GO:0005515
OE9A004855	17.2264	2.80806	0.737127	3.80947	0.000139265	0.000909378	OE9A004855	ID=OE9A004855T3;Parent=OE9A004855;Name=OE9A004855T3;product=OE9A004855P2;Description=trehalose-phosphate phosphatase A-like isoform X1;Ontology_term=GO:0004805%2C GO:0005982%2C GO:0005985%2C GO:0005992%2C GO:0016311
OE9A069723	17.0745	2.80656	0.632964	4.43399	9.2503e-06	8.43538e-05	OE9A069723	ID=OE9A069723T1;Parent=OE9A069723;Name=OE9A069723T1;product=OE9A069723P1;Description=probably inactive leucine-rich repeat receptor kinase At5g48380;Ontology_term=GO:0004672%2C GO:0005524%2C GO:0006468%2C GO:0016021
OE9A046869	23.1493	2.80584	0.583052	4.81233	1.49182e-06	1.66916e-05	OE9A046869	ID=OE9A046869T1;Parent=OE9A046869;Name=OE9A046869T1;product=OE9A046869P1;Description=probable carboxylesterase 120;Ontology_term=GO:0008152%2C GO:0016787
OE9A011769	148.739	2.80487	0.935049	2.9997	0.00270246	0.0115164	OE9A011769	ID=OE9A011769T1;Parent=OE9A011769;Name=OE9A011769T1;product=OE9A011769P1;Description=SENESCENCE-ASSOCIATED GENE 21, mitochondrial-like;Ontology_term=GO:0006950
OE9A056253	3312.18	2.80394	0.319446	8.77751	1.67129e-18	2.28153e-16	OE9A056253	ID=OE9A056253T1;Parent=OE9A056253;Name=OE9A056253T1;product=OE9A056253P1;Description=E3 ubiquitin- ligase MIEL1-like;Ontology_term=GO:0005515%2C GO:0008270
OE9A106929	8.33643	2.80376	0.867417	3.23231	0.00122793	0.00593343	OE9A106929	ID=OE9A106929T1;Parent=OE9A106929;Name=OE9A106929T1;product=OE9A106929P1;Description=peroxisomal biogenesis factor 6-like;Ontology_term=GO:0005524
OE9A001152	6.74498	2.8031	1.18646	2.36257	0.0181486	0.0549152	OE9A001152	ID=OE9A001152T1;Parent=OE9A001152;Name=OE9A001152T1;product=OE9A001152P1
OE9A063695	58.5091	2.80098	0.413611	6.77201	1.27004e-11	4.66322e-10	OE9A063695	ID=OE9A063695T1;Parent=OE9A063695;Name=OE9A063695T1;product=OE9A063695P1;Description=U-box domain-containing 16;Ontology_term=GO:0004842%2C GO:0005515%2C GO:0005634%2C GO:0005737%2C GO:0016567
OE9A106151	66.1189	2.79891	0.342003	8.18389	2.74822e-16	2.64425e-14	OE9A106151	ID=OE9A106151T1;Parent=OE9A106151;Name=OE9A106151T1;product=OE9A106151P1;Description=G-type lectin S-receptor-like serine threonine- kinase RLK1;Ontology_term=GO:0004674%2C GO:0005524%2C GO:0006468%2C GO:0009069%2C GO:0016020
OE9A106042	97.946	2.79654	0.437626	6.39027	1.65595e-10	4.61586e-09	OE9A106042	ID=OE9A106042T1;Parent=OE9A106042;Name=OE9A106042T1;product=OE9A106042P1;Description=germin subfamily T member 2;Ontology_term=GO:0004784%2C GO:0005576%2C GO:0005618%2C GO:0019430%2C GO:0030145%2C GO:0033609%2C GO:0045735%2C GO:0046487%2C GO:0046564%2C GO:0055114
OE9A058374	3.64448	2.79473	1.11773	2.50037	0.0124065	0.0403912	OE9A058374	ID=OE9A058374T1;Parent=OE9A058374;Name=OE9A058374T1;product=OE9A058374P1
OE9A115258	7.54876	2.79438	0.984444	2.83853	0.00453213	0.0176869	OE9A115258	ID=OE9A115258T1;Parent=OE9A115258;Name=OE9A115258T1;product=OE9A115258P1;Description=transmembrane 9 superfamily member 9-like;Ontology_term=GO:0016021
OE9A082423	5.46494	2.79423	0.831748	3.35947	0.000780928	0.00402607	OE9A082423	ID=OE9A082423T1;Parent=OE9A082423;Name=OE9A082423T1;product=OE9A082423P1;Description=ABC transporter G family member 29;Ontology_term=GO:0005524%2C GO:0005886%2C GO:0016021%2C GO:0042626%2C GO:0055085
OE9A116505	3.71823	2.79412	1.16787	2.39249	0.0167347	0.0514308	OE9A116505	ID=OE9A116505T1;Parent=OE9A116505;Name=OE9A116505T1;product=OE9A116505P1;Description=G-type lectin S-receptor-like serine threonine- kinase At4g27290 isoform X2;Ontology_term=GO:0004674%2C GO:0005524%2C GO:0006468%2C GO:0009069
OE9A025777	24.3945	2.79124	0.552751	5.04973	4.42426e-07	5.6705e-06	OE9A025777	ID=OE9A025777T1;Parent=OE9A025777;Name=OE9A025777T1;product=OE9A025777P1;Description=wall-associated receptor kinase-like 8;Ontology_term=GO:0004672%2C GO:0005509%2C GO:0005515%2C GO:0005524%2C GO:0006468%2C GO:0030247
OE9pt000018	1851.9	2.7896	0.287409	9.70605	2.84149e-22	6.98219e-20	OE9pt000018	ID=OE9pt000018T1;Parent=OE9pt000018;product=OE9pt000018P1;Description=ycf9
OE9A061573	2.96509	2.78959	1.06315	2.6239	0.00869296	0.030118	OE9A061573	ID=OE9A061573T1;Parent=OE9A061573;Name=OE9A061573T1;product=OE9A061573P1;Description=polygalacturonase-like;Ontology_term=GO:0004650%2C GO:0005576%2C GO:0005982%2C GO:0005985%2C GO:0071555
OE9A026578	3.87244	2.78925	1.05723	2.63827	0.00833308	0.0291141	OE9A026578	ID=OE9A026578T1;Parent=OE9A026578;Name=OE9A026578T1;product=OE9A026578P1;Description=Dipeptide transport ATP-binding dppF;Ontology_term=GO:0005524
OE9A116045	278.026	2.78831	0.612735	4.5506	5.34942e-06	5.18205e-05	OE9A116045	ID=OE9A116045T1;Parent=OE9A116045;Name=OE9A116045T1;product=OE9A116045P1;Description=acidic endochitinase-like;Ontology_term=GO:0004568%2C GO:0005576%2C GO:0005975%2C GO:0006032%2C GO:0008061%2C GO:0016998
OE9A050599	6.92483	2.78771	0.884606	3.15135	0.00162516	0.00748687	OE9A050599	ID=OE9A050599T1;Parent=OE9A050599;Name=OE9A050599T1;product=OE9A050599P1
OE9A081193	11.4563	2.78739	0.558023	4.99512	5.87978e-07	7.24908e-06	OE9A081193	ID=OE9A081193T1;Parent=OE9A081193;Name=OE9A081193T1;product=OE9A081193P1;Description=sentrin-specific protease 6-like;Ontology_term=GO:0006508%2C GO:0008234
OE9A035619	320.096	2.78668	0.292581	9.52447	1.65887e-21	3.55645e-19	OE9A035619	ID=OE9A035619T1;Parent=OE9A035619;Name=OE9A035619T1;product=OE9A035619P1;Description=quinone-oxidoreductase homolog, chloroplastic;Ontology_term=GO:0008270%2C GO:0016491%2C GO:0055114
OE9A092361	4.27517	2.7855	1.0234	2.7218	0.00649271	0.0237629	OE9A092361	ID=OE9A092361T1;Parent=OE9A092361;Name=OE9A092361T1;product=OE9A092361P1
OE9A081102	4.86684	2.78542	1.0977	2.53751	0.0111643	0.0370873	OE9A081102	ID=OE9A081102T1;Parent=OE9A081102;Name=OE9A081102T1;product=OE9A081102P1;Description=leucoanthocyanidin dioxygenase;Ontology_term=GO:0009718%2C GO:0031418%2C GO:0046872%2C GO:0050589%2C GO:0055114
OE9A087218	29.7811	2.78427	0.613323	4.53965	5.63481e-06	5.43145e-05	OE9A087218	ID=OE9A087218T1;Parent=OE9A087218;Name=OE9A087218T1;product=OE9A087218P1;Description=exocyst complex component EXO70H1-like;Ontology_term=GO:0000145%2C GO:0006887
OE9A043016	5.40739	2.78384	0.973724	2.85896	0.00425034	0.0167641	OE9A043016	ID=OE9A043016T1;Parent=OE9A043016;Name=OE9A043016T1;product=OE9A043016P1
OE9A035772	40.9896	2.78286	0.424591	6.55422	5.59348e-11	1.7432e-09	OE9A035772	ID=OE9A035772T1;Parent=OE9A035772;Name=OE9A035772T1;product=OE9A035772P1;Description=berberine bridge enzyme-like 18;Ontology_term=GO:0016614%2C GO:0050660%2C GO:0055114
OE9A118289	42.0548	2.78273	0.427417	6.51057	7.48682e-11	2.26262e-09	OE9A118289	ID=OE9A118289T1;Parent=OE9A118289;Name=OE9A118289T1;product=OE9A118289P1;Description=cytochrome P450 81F3-like;Ontology_term=GO:0005506%2C GO:0016021%2C GO:0020037%2C GO:0033773%2C GO:0042343%2C GO:0044550%2C GO:0055114%2C GO:0098542
OE9A001432	6.75524	2.78208	0.856622	3.24773	0.0011633	0.0056604	OE9A001432	ID=OE9A001432T1;Parent=OE9A001432;Name=OE9A001432T1;product=OE9A001432P1;Description=shaggy-related kinase alpha;Ontology_term=GO:0004672%2C GO:0005524%2C GO:0006468
OE9A062505	6.60618	2.7799	0.77528	3.58568	0.000336204	0.00194068	OE9A062505	ID=OE9A062505T1;Parent=OE9A062505;Name=OE9A062505T1;product=OE9A062505P1;Description=cyclic nucleotide-gated ion channel 17;Ontology_term=GO:0005249%2C GO:0005515%2C GO:0008076%2C GO:0042391%2C GO:0071805
OE9A104106	194.133	2.77968	0.389913	7.12898	1.01118e-12	4.62104e-11	OE9A104106	ID=OE9A104106T1;Parent=OE9A104106;Name=OE9A104106T1;product=OE9A104106P1
OE9A087957	16.0709	2.77841	0.750018	3.70446	0.00021184	0.00130411	OE9A087957	ID=OE9A087957T1;Parent=OE9A087957;Name=OE9A087957T1;product=OE9A087957P1;Description=histidine-containing phosphotransfer 4;Ontology_term=GO:0000160%2C GO:0005634%2C GO:0005737%2C GO:0009736%2C GO:0009927%2C GO:0016021%2C GO:0016310%2C GO:0032440%2C GO:0043424%2C GO:0055114
OE9A021956	39.6344	2.77745	0.522849	5.31215	1.08338e-07	1.62629e-06	OE9A021956	ID=OE9A021956T1;Parent=OE9A021956;Name=OE9A021956T1;product=OE9A021956P1
OE9A110918	4.93901	2.77681	1.26513	2.19489	0.0281718	0.0779893	OE9A110918	ID=OE9A110918T1;Parent=OE9A110918;Name=OE9A110918T1;product=OE9A110918P1;Description=alpha carbonic anhydrase 7;Ontology_term=GO:0004089%2C GO:0006730%2C GO:0006807%2C GO:0008270
OE9A078470	1.39737	2.77627	1.24742	2.2256	0.0260411	0.0732688	OE9A078470	ID=OE9A078470T1;Parent=OE9A078470;Name=OE9A078470T1;product=OE9A078470P1;Description=pentatricopeptide repeat-containing At4g16835, mitochondrial;Ontology_term=GO:0005515%2C GO:0008270
OE9A079510	9.37607	2.77578	0.870347	3.18928	0.00142628	0.00672391	OE9A079510	ID=OE9A079510T1;Parent=OE9A079510;Name=OE9A079510T1;product=OE9A079510P1;Description=axial regulator YABBY 1;Ontology_term=GO:0009909%2C GO:0009933%2C GO:0010093%2C GO:0010154%2C GO:0010158%2C GO:0010159%2C GO:0010450
OE9A114837	12.4713	2.77403	0.574809	4.826	1.39303e-06	1.56963e-05	OE9A114837	ID=OE9A114837T1;Parent=OE9A114837;Name=OE9A114837T1;product=OE9A114837P1
OE9A085232	7.26889	2.77325	0.824264	3.36452	0.000766772	0.00396275	OE9A085232	ID=OE9A085232T1;Parent=OE9A085232;Name=OE9A085232T1;product=OE9A085232P1;Description=auxin-responsive IAA30;Ontology_term=GO:0005515%2C GO:0005634%2C GO:0006355%2C GO:0009734
OE9A059581	219.124	2.77207	0.2372	11.6866	1.4921e-31	1.83322e-28	OE9A059581	ID=OE9A059581T1;Parent=OE9A059581;Name=OE9A059581T1;product=OE9A059581P1;Description=kinase 2B, chloroplastic;Ontology_term=GO:0004672%2C GO:0005524%2C GO:0006468
OE9A113787	13.8515	2.77182	0.809837	3.42269	0.000620037	0.00329066	OE9A113787	ID=OE9A113787T1;Parent=OE9A113787;Name=OE9A113787T1;product=OE9A113787P1;Description=patatin 2;Ontology_term=GO:0004620%2C GO:0005737%2C GO:0009395%2C GO:0016020%2C GO:0046486%2C GO:0047372
OE9A058529	7.05364	2.77147	0.65149	4.25404	2.09948e-05	0.000174152	OE9A058529	ID=OE9A058529T1;Parent=OE9A058529;Name=OE9A058529T1;product=OE9A058529P1;Description=exocyst complex component EXO70A1-like;Ontology_term=GO:0000145%2C GO:0006887
OE9A018635	2.10953	2.77123	1.23075	2.25166	0.0243436	0.0693757	OE9A018635	ID=OE9A018635T1;Parent=OE9A018635;Name=OE9A018635T1;product=OE9A018635P1;Description=Glycosyl transferase;Ontology_term=GO:0016021
OE9A015472	2.33249	2.77073	1.21269	2.28478	0.0223258	0.0648755	OE9A015472	ID=OE9A015472T1;Parent=OE9A015472;Name=OE9A015472T1;product=OE9A015472P1
OE9A047033	4.92587	2.76792	0.971306	2.84969	0.0043762	0.0171736	OE9A047033	ID=OE9A047033T1;Parent=OE9A047033;Name=OE9A047033T1;product=OE9A047033P1;Description=probable polygalacturonase At3g15720;Ontology_term=GO:0004650%2C GO:0005982%2C GO:0005985
[truncated: 803 more rows]

## Sheet: ShinyGO UP FC >2
	Enrichment FDR	nGenes	Pathway Genes	Fold Enrichment	Pathways (click for details)	Genes
[truncated: 20 more rows]

## Sheet: DOWN FC<-2
List of Differential Expressed Genes (DEGs) fold change (FC) <-2 of olives treated with PsJN at T2 compared with the same plants at T0.
[truncated: 890 more rows]

[truncated: 1 more sheets: ShinyGO DOWN FC<-2 ]
