# Supplementary material for: Comparative transcriptomics of biopesticide-treated olives subjected to Xylella infection
Source: Research Square preprint supplement (doi:10.21203/rs.3.rs-8603179/v1), 2026-01-29
Supplement: Supplementary file 15 [file ebeeaf56e2e3c9c3fda0593c.xlsx]

## Sheet: UP FC>2
List of Differential Expressed Genes (DEGs) FC >2 T6_MockOnion
Gene ID	baseMean	log2FoldChange	lfcSE	stat	pvalue	padj	id gene	Description
OE9A111009	94.8633	5.41483	1.35567	3.9942	6.49118e-05	0.0146166	OE9A111009	ID=OE9A111009T1;Parent=OE9A111009;Name=OE9A111009T1;product=OE9A111009P1
OE9A011073	177.446	5.25701	0.909763	5.77844	7.53963e-09	2.26297e-05	OE9A011073	ID=OE9A011073T1;Parent=OE9A011073;Name=OE9A011073T1;product=OE9A011073P1
OE9A089849	359.047	5.10271	0.971132	5.25439	1.48513e-07	0.000219669	OE9A089849	ID=OE9A089849T1;Parent=OE9A089849;Name=OE9A089849T1;product=OE9A089849P1;Description=kDa class I heat shock -like;Ontology_term=GO:0005737
OE9A103263	6559.37	4.68897	1.39475	3.36187	0.000774157	0.0649688	OE9A103263	ID=OE9A103263T1;Parent=OE9A103263;Name=OE9A103263T1;product=OE9A103263P1
OE9A033588	15.3663	4.61048	1.43329	3.21671	0.00129669	0.0862009	OE9A033588	ID=OE9A033588T1;Parent=OE9A033588;Name=OE9A033588T1;product=OE9A033588P1;Description=Multicopper oxidase;Ontology_term=GO:0005507%2C GO:0046274%2C GO:0048046%2C GO:0052716%2C GO:0055114
OE9A086519	377.628	4.44761	0.536053	8.29697	1.06803e-16	2.5276e-12	OE9A086519	ID=OE9A086519T1;Parent=OE9A086519;Name=OE9A086519T1;product=OE9A086519P1;Description=heat stress transcription factor A-7a-like;Ontology_term=GO:0003700%2C GO:0005634%2C GO:0005667%2C GO:0006355%2C GO:0043565%2C GO:0045449
OE9A071045	888.235	4.22393	0.750391	5.62897	1.81289e-08	4.29038e-05	OE9A071045	ID=OE9A071045T1;Parent=OE9A071045;Name=OE9A071045T1;product=OE9A071045P1;Description=heat shock 83;Ontology_term=GO:0005524%2C GO:0005737%2C GO:0006457%2C GO:0006950%2C GO:0051082
OE9A088576	49.5748	4.19165	0.822958	5.0934	3.51705e-07	0.00037405	OE9A088576	ID=OE9A088576T1;Parent=OE9A088576;Name=OE9A088576T1;product=OE9A088576P1
OE9A047856	1389.47	4.14973	0.715707	5.79808	6.70776e-09	2.26297e-05	OE9A047856	ID=OE9A047856T1;Parent=OE9A047856;Name=OE9A047856T1;product=OE9A047856P1;Description=heat shock 83;Ontology_term=GO:0005524%2C GO:0006457%2C GO:0006950%2C GO:0051082
OE9A111350	32.2983	3.90109	0.865003	4.50992	6.48533e-06	0.00306964	OE9A111350	ID=OE9A111350T1;Parent=OE9A111350;Name=OE9A111350T1;product=OE9A111350P1;Description=multi -bridging factor 1c;Ontology_term=GO:0003713%2C GO:0005667%2C GO:0005730%2C GO:0043565%2C GO:0045941
OE9A070761	47645.7	3.80096	0.866314	4.38751	1.14656e-05	0.00430707	OE9A070761	ID=OE9A070761T1;Parent=OE9A070761;Name=OE9A070761T1;product=OE9A070761P1
OE9A088690	82.726	3.77711	0.954085	3.95888	7.53014e-05	0.0154964	OE9A088690	ID=OE9A088690T1;Parent=OE9A088690;Name=OE9A088690T1;product=OE9A088690P1;Description=kDa class I heat shock -like;Ontology_term=GO:0005737
OE9A015658	51.5007	3.75367	1.06728	3.51704	0.000436388	0.0465205	OE9A015658	ID=OE9A015658T1;Parent=OE9A015658;Name=OE9A015658T1;product=OE9A015658P1;Description=NADH dehydrogenase subunit 9 (mitochondrion);Ontology_term=GO:0005739%2C GO:0006120%2C GO:0006744%2C GO:0006814%2C GO:0008137%2C GO:0015992
OE9mt000041	49.2017	3.73865	1.10139	3.39448	0.000687582	0.0606637	OE9mt000041	ID=OE9mt000041T1;Parent=OE9mt000041;product=OE9mt000041P1;Description=nad9;Name=OE9mt000041T1
OE9A071496	24.4022	3.70612	1.11428	3.32602	0.000880963	0.0699627	OE9A071496	ID=OE9A071496T1;Parent=OE9A071496;Name=OE9A071496T1;product=OE9A071496P1;Description=transcription factor MYB108-like;Ontology_term=GO:0003677
OE9A088229	26.3355	3.64201	0.827619	4.40059	1.07956e-05	0.00412077	OE9A088229	ID=OE9A088229T1;Parent=OE9A088229;Name=OE9A088229T1;product=OE9A088229P1
OE9A000683	23.9638	3.53555	0.762229	4.63844	3.5105e-06	0.00207699	OE9A000683	ID=OE9A000683T1;Parent=OE9A000683;Name=OE9A000683T1;product=OE9A000683P1;Description=nuclear valosin-containing -like;Ontology_term=GO:0005524%2C GO:0005634%2C GO:0008568%2C GO:0031122
OE9mt000038	25.3398	3.50901	0.946816	3.70611	0.000210464	0.0272607	OE9mt000038	ID=OE9mt000038T1;Parent=OE9mt000038;product=OE9mt000038P1;Description=nad6;Name=OE9mt000038T1
OE9A113017	258.155	3.4371	0.844084	4.07199	4.66129e-05	0.0119196	OE9A113017	ID=OE9A113017T1;Parent=OE9A113017;Name=OE9A113017T1;product=OE9A113017P1;Description=kda class ii heat shock;Ontology_term=GO:0005737
OE9mt000024	34.9719	3.37073	0.850423	3.96359	7.38323e-05	0.0153273	OE9mt000024	ID=OE9mt000024T1;Parent=OE9mt000024;product=OE9mt000024P1;Description=ccmFn;Name=OE9mt000024T1
OE9A032722	36.6709	3.35248	0.770269	4.35235	1.34687e-05	0.00490384	OE9A032722	ID=OE9A032722T1;Parent=OE9A032722;Name=OE9A032722T1;product=OE9A032722P1
OE9A062566	596.556	3.34335	0.730061	4.57956	4.65963e-06	0.00234627	OE9A062566	ID=OE9A062566T1;Parent=OE9A062566;Name=OE9A062566T1;product=OE9A062566P1;Description=kda class ii heat shock;Ontology_term=GO:0005737
OE9mt000016	19.2336	3.27819	0.895468	3.66087	0.000251359	0.0310622	OE9mt000016	ID=OE9mt000016T1;Parent=OE9mt000016;product=OE9mt000016P1;Description=nad4L;Name=OE9mt000016T1
OE9A006987	24.3023	3.24235	0.981794	3.30248	0.000958345	0.0729266	OE9A006987	ID=OE9A006987T1;Parent=OE9A006987;Name=OE9A006987T1;product=OE9A006987P1
OE9mt000039	31.0576	3.23444	0.765875	4.2232	2.40859e-05	0.00740281	OE9mt000039	ID=OE9mt000039T1;Parent=OE9mt000039;product=OE9mt000039P1;Description=rps4;Name=OE9mt000039T1
OE9A059474	104.041	3.21518	0.953515	3.37192	0.000746468	0.0640069	OE9A059474	ID=OE9A059474T1;Parent=OE9A059474;Name=OE9A059474T1;product=OE9A059474P1
OE9mt000032	36.4103	3.19262	0.81067	3.93825	8.20787e-05	0.0164616	OE9mt000032	ID=OE9mt000032T1;Parent=OE9mt000032;product=OE9mt000032P1;Description=atp6;Name=OE9mt000032T1
OE9A056470	345083	3.18642	0.74474	4.27857	1.88099e-05	0.00635937	OE9A056470	ID=OE9A056470T1;Parent=OE9A056470;Name=OE9A056470T1;product=OE9A056470P1
OE9A072320	16178.6	3.17474	0.780198	4.06915	4.71853e-05	0.0119196	OE9A072320	ID=OE9A072320T1;Parent=OE9A072320;Name=OE9A072320T1;product=OE9A072320P1;Description=thioredoxin 4B;Ontology_term=GO:0000245%2C GO:0005681%2C GO:0005682%2C GO:0046540
OE9A025807	340.433	3.17375	0.727369	4.36333	1.281e-05	0.00473689	OE9A025807	ID=OE9A025807T1;Parent=OE9A025807;Name=OE9A025807T1;product=OE9A025807P1
OE9A000019	7067.68	3.17038	0.831541	3.81265	0.000137484	0.0221341	OE9A000019	ID=OE9A000019T1;Parent=OE9A000019;Name=OE9A000019T1;product=OE9A000019P1
OE9A006738	276764	3.16599	0.771671	4.10278	4.08223e-05	0.0111046	OE9A006738	ID=OE9A006738T1;Parent=OE9A006738;Name=OE9A006738T1;product=OE9A006738P1
OE9A064929	109.835	3.16488	0.79277	3.99218	6.54678e-05	0.0146166	OE9A064929	ID=OE9A064929T1;Parent=OE9A064929;Name=OE9A064929T1;product=OE9A064929P1;Description=small heat shock , chloroplastic;Ontology_term=GO:0009536
OE9A061546	17.4347	3.11048	0.807213	3.85335	0.000116511	0.0201267	OE9A061546	ID=OE9A061546T1;Parent=OE9A061546;Name=OE9A061546T1;product=OE9A061546P1;Description=methyl- -binding domain-containing 2-like;Ontology_term=GO:0000122%2C GO:0005634%2C GO:0006346%2C GO:0008270%2C GO:0008327
OE9A034024	177.015	3.09662	0.813966	3.80436	0.000142173	0.0225816	OE9A034024	ID=OE9A034024T1;Parent=OE9A034024;Name=OE9A034024T1;product=OE9A034024P1
OE9A016925	32.8718	3.07988	0.927133	3.32194	0.000893938	0.0705198	OE9A016925	ID=OE9A016925T1;Parent=OE9A016925;Name=OE9A016925T1;product=OE9A016925P1;Description=9-cis-epoxycarotenoid dioxygenase NCED1, chloroplastic-like;Ontology_term=GO:0016702%2C GO:0055114
OE9A052815	167393	3.07652	0.718803	4.28006	1.86844e-05	0.00635937	OE9A052815	ID=OE9A052815T1;Parent=OE9A052815;Name=OE9A052815T1;product=OE9A052815P1
OE9A020818	455321	3.02816	0.725998	4.17103	3.03223e-05	0.0087513	OE9A020818	ID=OE9A020818T1;Parent=OE9A020818;Name=OE9A020818T1;product=OE9A020818P1
OE9A044557	14.9614	3.01788	0.807759	3.73612	0.000186881	0.0252611	OE9A044557	ID=OE9A044557T1;Parent=OE9A044557;Name=OE9A044557T1;product=OE9A044557P1;Description=Six-bladed beta-propeller;Ontology_term=GO:0005515%2C GO:0016021
OE9mt000031	95.6708	3.00738	0.593896	5.06382	4.10939e-07	0.00037405	OE9mt000031	ID=OE9mt000031T1;Parent=OE9mt000031;product=OE9mt000031P1;Description=rps3;Name=OE9mt000031T1
OE9A082461	10642.9	3.00193	0.781228	3.84257	0.000121752	0.0205814	OE9A082461	ID=OE9A082461T1;Parent=OE9A082461;Name=OE9A082461T1;product=OE9A082461P1
OE9A115091	1025.61	2.95754	0.796414	3.71358	0.000204351	0.0268677	OE9A115091	ID=OE9A115091T1;Parent=OE9A115091;Name=OE9A115091T1;product=OE9A115091P1
OE9A064521	26.129	2.91674	0.685409	4.25548	2.08605e-05	0.0067628	OE9A064521	ID=OE9A064521T1;Parent=OE9A064521;Name=OE9A064521T1;product=OE9A064521P1;Description=HSP70, partial;Ontology_term=GO:0005524
OE9mt000040	46.9664	2.90639	0.791178	3.67349	0.000239256	0.0301183	OE9mt000040	ID=OE9mt000040T1;Parent=OE9mt000040;product=OE9mt000040P1;Description=rpl10;Name=OE9mt000040T1
OE9A023348	237553	2.89824	0.718781	4.03216	5.52666e-05	0.0132115	OE9A023348	ID=OE9A023348T1;Parent=OE9A023348;Name=OE9A023348T1;product=OE9A023348P1
OE9A116990	14.0291	2.88686	0.766191	3.76781	0.000164689	0.0236214	OE9A116990	ID=OE9A116990T1;Parent=OE9A116990;Name=OE9A116990T1;product=OE9A116990P1;Description=pentatricopeptide repeat-containing At3g29230-like;Ontology_term=GO:0005515
OE9pt000038	53.0409	2.87852	0.675827	4.25926	2.05107e-05	0.0067628	OE9pt000038	ID=OE9pt000038T1;Parent=OE9pt000038;product=OE9pt000038P1;Description=psbE
OE9A000757	388.267	2.87294	0.736158	3.90261	9.51594e-05	0.0173677	OE9A000757	ID=OE9A000757T1;Parent=OE9A000757;Name=OE9A000757T1;product=OE9A000757P1
OE9A107581	333267	2.85635	0.707039	4.03988	5.34785e-05	0.0129145	OE9A107581	ID=OE9A107581T1;Parent=OE9A107581;Name=OE9A107581T1;product=OE9A107581P1
OE9A019700	442024	2.85616	0.701564	4.07113	4.67865e-05	0.0119196	OE9A019700	ID=OE9A019700T1;Parent=OE9A019700;Name=OE9A019700T1;product=OE9A019700P1
OE9A074222	291599	2.84409	0.702724	4.04723	5.18264e-05	0.0126446	OE9A074222	ID=OE9A074222T1;Parent=OE9A074222;Name=OE9A074222T1;product=OE9A074222P1
OE9A053389	718.95	2.81877	0.790706	3.56487	0.000364035	0.0408305	OE9A053389	ID=OE9A053389T1;Parent=OE9A053389;Name=OE9A053389T1;product=OE9A053389P1;Description=probable nucleoredoxin 1;Ontology_term=GO:0005623%2C GO:0045454
OE9A001133	1740.1	2.81063	0.806833	3.48354	0.000494836	0.0502609	OE9A001133	ID=OE9A001133T1;Parent=OE9A001133;Name=OE9A001133T1;product=OE9A001133P1
OE9A007381	157.629	2.80909	0.538989	5.21177	1.87047e-07	0.000232982	OE9A007381	ID=OE9A007381T1;Parent=OE9A007381;Name=OE9A007381T1;product=OE9A007381P1;Description=BAG family molecular chaperone regulator 5;Ontology_term=GO:0051087
OE9A017410	171631	2.78177	0.698094	3.9848	6.75363e-05	0.0146634	OE9A017410	ID=OE9A017410T1;Parent=OE9A017410;Name=OE9A017410T1;product=OE9A017410P1
OE9A024639	645.726	2.73945	0.636062	4.3069	1.65562e-05	0.00584804	OE9A024639	ID=OE9A024639T1;Parent=OE9A024639;Name=OE9A024639T1;product=OE9A024639P1
OE9mt000001	137.631	2.73085	0.615209	4.4389	9.04184e-06	0.00376441	OE9mt000001	ID=OE9mt000001T1;Parent=OE9mt000001;product=OE9mt000001P1;Description=nad5;Name=OE9mt000001T1
OE9mt000014	23.7513	2.7223	0.849193	3.20575	0.0013471	0.087344	OE9mt000014	ID=OE9mt000014T1;Parent=OE9mt000014;product=OE9mt000014P1;Description=nad1;Name=OE9mt000014T1
OE9mt000015	170.108	2.71499	0.74869	3.62632	0.000287491	0.0347131	OE9mt000015	ID=OE9mt000015T1;Parent=OE9mt000015;product=OE9mt000015P1;Description=nad7;Name=OE9mt000015T1
OE9A119169	596.722	2.70463	0.611252	4.42473	9.65614e-06	0.00394004	OE9A119169	ID=OE9A119169T1;Parent=OE9A119169;Name=OE9A119169T1;product=OE9A119169P1
OE9pt000021	419.841	2.68477	0.712135	3.77003	0.000163228	0.0235546	OE9pt000021	ID=OE9pt000021T1;Parent=OE9pt000021;product=OE9pt000021P1;Description=psaA
OE9A031473	20.8172	2.66755	0.525911	5.07226	3.93127e-07	0.00037405	OE9A031473	ID=OE9A031473T1;Parent=OE9A031473;Name=OE9A031473T1;product=OE9A031473P1
OE9mt000002	54.9121	2.66583	0.713148	3.73812	0.0001854	0.0252165	OE9mt000002	ID=OE9mt000002T1;Parent=OE9mt000002;product=OE9mt000002P1;Description=nad5;Name=OE9mt000002T1
OE9A073171	45067.1	2.66338	0.714296	3.72868	0.000192488	0.0255922	OE9A073171	ID=OE9A073171T1;Parent=OE9A073171;Name=OE9A073171T1;product=OE9A073171P1
OE9mt000017	45.2636	2.66324	0.786608	3.38573	0.000709896	0.0614477	OE9mt000017	ID=OE9mt000017T1;Parent=OE9mt000017;product=OE9mt000017P1;Description=atp4;Name=OE9mt000017T1
OE9mt000050	58.9354	2.65334	0.650708	4.07762	4.54995e-05	0.0119196	OE9mt000050	ID=OE9mt000050T1;Parent=OE9mt000050;product=OE9mt000050P1;Description=rpl2;Name=OE9mt000050T1
OE9A006406	88.2688	2.63872	0.573662	4.59978	4.22945e-06	0.00227487	OE9A006406	ID=OE9A006406T1;Parent=OE9A006406;Name=OE9A006406T1;product=OE9A006406P1;Description=ethylene-responsive transcription factor 1B-like;Ontology_term=GO:0003677%2C GO:0003700%2C GO:0005667%2C GO:0006355%2C GO:0045449
OE9A063437	138.052	2.6299	0.539204	4.87736	1.07513e-06	0.000893245	OE9A063437	ID=OE9A063437T1;Parent=OE9A063437;Name=OE9A063437T1;product=OE9A063437P1
OE9A059114	407.154	2.61778	0.616188	4.24836	2.15345e-05	0.00688698	OE9A059114	ID=OE9A059114T1;Parent=OE9A059114;Name=OE9A059114T1;product=OE9A059114P1
OE9A062869	45619.3	2.61725	0.650615	4.02274	5.75257e-05	0.013614	OE9A062869	ID=OE9A062869T1;Parent=OE9A062869;Name=OE9A062869T1;product=OE9A062869P1
OE9A023969	24017.9	2.60948	0.615038	4.2428	2.20752e-05	0.00696576	OE9A023969	ID=OE9A023969T1;Parent=OE9A023969;Name=OE9A023969T1;product=OE9A023969P1
OE9mt000052	784.423	2.58365	0.68525	3.77038	0.000162999	0.0235546	OE9mt000052	ID=OE9mt000052T1;Parent=OE9mt000052;product=OE9mt000052P1;Description=atp1;Name=OE9mt000052T1
OE9mt000005	102.182	2.55875	0.672926	3.80242	0.000143287	0.0226069	OE9mt000005	ID=OE9mt000005T1;Parent=OE9mt000005;product=OE9mt000005P1;Description=nad2;Name=OE9mt000005T1
OE9A097226	503.49	2.546	0.502364	5.06804	4.01928e-07	0.00037405	OE9A097226	ID=OE9A097226T1;Parent=OE9A097226;Name=OE9A097226T1;product=OE9A097226P1
OE9pt000003	61.2202	2.54566	0.568784	4.47562	7.61915e-06	0.00346759	OE9pt000003	ID=OE9pt000003T1;Parent=OE9pt000003;product=OE9pt000003P1;Description=rps16
OE9A041715	74.7159	2.53671	0.486049	5.21904	1.79852e-07	0.000232982	OE9A041715	ID=OE9A041715T1;Parent=OE9A041715;Name=OE9A041715T1;product=OE9A041715P1
OE9A078198	22.8403	2.52711	0.802133	3.15049	0.00162998	0.0985924	OE9A078198	ID=OE9A078198T1;Parent=OE9A078198;Name=OE9A078198T1;product=OE9A078198P1;Description=MDIS1-interacting receptor like kinase 2-like;Ontology_term=GO:0004672%2C GO:0005515%2C GO:0005524%2C GO:0006468
OE9mt000011	32.3982	2.52272	0.804195	3.13695	0.00170717	0.0997358	OE9mt000011	ID=OE9mt000011T1;Parent=OE9mt000011;product=OE9mt000011P1;Description=nad1;Name=OE9mt000011T1
OE9A057180	267.371	2.51219	0.48792	5.14877	2.62205e-07	0.000295492	OE9A057180	ID=OE9A057180T1;Parent=OE9A057180;Name=OE9A057180T1;product=OE9A057180P1;Description=BAG family molecular chaperone regulator 5;Ontology_term=GO:0051087
OE9pt000031	30.2133	2.5001	0.558527	4.47623	7.59715e-06	0.00346759	OE9pt000031	ID=OE9pt000031T1;Parent=OE9pt000031;product=OE9pt000031P1;Description=psaI
OE9A033947	56.0175	2.4506	0.72038	3.40181	0.000669403	0.0601722	OE9A033947	ID=OE9A033947T1;Parent=OE9A033947;Name=OE9A033947T1;product=OE9A033947P1;Description=cytochrome P450 78A6-like;Ontology_term=GO:0004497%2C GO:0005506%2C GO:0016021%2C GO:0016705%2C GO:0020037%2C GO:0055114
OE9A075985	1006.63	2.45016	0.556686	4.40134	1.07585e-05	0.00412077	OE9A075985	ID=OE9A075985T1;Parent=OE9A075985;Name=OE9A075985T1;product=OE9A075985P1;Description=heat shock cognate 70 kDa 2-like;Ontology_term=GO:0005524
OE9A099609	17.9631	2.44121	0.775857	3.14648	0.00165251	0.0985924	OE9A099609	ID=OE9A099609T1;Parent=OE9A099609;Name=OE9A099609T1;product=OE9A099609P1;Description=phytoene synthase 2, chloroplastic;Ontology_term=GO:0006694%2C GO:0016102%2C GO:0016767
OE9A058749	535.442	2.42408	0.692375	3.50111	0.000463323	0.0480928	OE9A058749	ID=OE9A058749T1;Parent=OE9A058749;Name=OE9A058749T1;product=OE9A058749P1
OE9pt000076	49.1013	2.41903	0.608147	3.97771	6.95834e-05	0.0149706	OE9pt000076	ID=OE9pt000076T1;Parent=OE9pt000076;product=OE9pt000076P1;Description=ndhA
OE9A018696	1313.31	2.38982	0.408559	5.8494	4.93362e-09	2.26297e-05	OE9A018696	ID=OE9A018696T1;Parent=OE9A018696;Name=OE9A018696T1;product=OE9A018696P1;Description=E3 ubiquitin- ligase RING1-like;Ontology_term=GO:0005515%2C GO:0008270%2C GO:0044267
OE9A088270	30.5504	2.31227	0.604472	3.82527	0.000130631	0.0213764	OE9A088270	ID=OE9A088270T1;Parent=OE9A088270;Name=OE9A088270T1;product=OE9A088270P1;Description=Methyltransferase type 11;Ontology_term=GO:0008168%2C GO:0016021%2C GO:0032259
OE9pt000016	287.265	2.29667	0.648188	3.54321	0.000395284	0.0431096	OE9pt000016	ID=OE9pt000016T1;Parent=OE9pt000016;product=OE9pt000016P1;Description=psbD
OE9A101914	64.0982	2.28452	0.638144	3.57995	0.00034366	0.0389142	OE9A101914	ID=OE9A101914T1;Parent=OE9A101914;Name=OE9A101914T1;product=OE9A101914P1
OE9A019610	1024.25	2.27464	0.48231	4.71615	2.40352e-06	0.00152303	OE9A019610	ID=OE9A019610T1;Parent=OE9A019610;Name=OE9A019610T1;product=OE9A019610P1;Description=probable WRKY transcription factor 70;Ontology_term=GO:0003700%2C GO:0005667%2C GO:0006355%2C GO:0043565%2C GO:0045449
OE9pt000072	52.3109	2.26467	0.698624	3.24161	0.00118855	0.0812953	OE9pt000072	ID=OE9pt000072T1;Parent=OE9pt000072;product=OE9pt000072P1;Description=psaC
OE9pt000020	510.535	2.25853	0.626123	3.60717	0.000309557	0.0364477	OE9pt000020	ID=OE9pt000020T1;Parent=OE9pt000020;product=OE9pt000020P1;Description=psaB
OE9mt000027	110.982	2.25285	0.598675	3.76306	0.000167847	0.0237819	OE9mt000027	ID=OE9mt000027T1;Parent=OE9mt000027;product=OE9mt000027P1;Description=cox3;Name=OE9mt000027T1
OE9mt000037	122.816	2.2363	0.633386	3.53071	0.00041444	0.0445824	OE9mt000037	ID=OE9mt000037T1;Parent=OE9mt000037;product=OE9mt000037P1;Description=atp9;Name=OE9mt000037T1
OE9A113215	874.223	2.23447	0.432946	5.16107	2.45536e-07	0.000290543	OE9A113215	ID=OE9A113215T1;Parent=OE9A113215;Name=OE9A113215T1;product=OE9A113215P1;Description=kDa heat shock , peroxisomal;Ontology_term=GO:0005782%2C GO:0006457
OE9mt000019	104.346	2.23043	0.589367	3.78446	0.000154044	0.0235078	OE9mt000019	ID=OE9mt000019T1;Parent=OE9mt000019;product=OE9mt000019P1;Description=cox3;Name=OE9mt000019T1
OE9A030644	625.906	2.22992	0.579922	3.8452	0.000120452	0.0205081	OE9A030644	ID=OE9A030644T1;Parent=OE9A030644;Name=OE9A030644T1;product=OE9A030644P1
OE9A073508	1463.13	2.21778	0.57648	3.84711	0.000119519	0.0204967	OE9A073508	ID=OE9A073508T3;Parent=OE9A073508;Name=OE9A073508T3;product=OE9A073508P3
OE9A010143	16.6644	2.21634	0.698611	3.1725	0.00151132	0.094087	OE9A010143	ID=OE9A010143T1;Parent=OE9A010143;Name=OE9A010143T1;product=OE9A010143P1;Description=phospholipase A1-Ibeta2, chloroplastic;Ontology_term=GO:0016042%2C GO:0016298%2C GO:0052689
OE9A085366	65.4165	2.20559	0.630657	3.49729	0.000470013	0.0485735	OE9A085366	ID=OE9A085366T1;Parent=OE9A085366;Name=OE9A085366T1;product=OE9A085366P1;Description=organic cation carnitine transporter 3-like;Ontology_term=GO:0016021%2C GO:0022857%2C GO:0055085
OE9pt000019	181.415	2.18798	0.521144	4.19841	2.68793e-05	0.00795157	OE9pt000019	ID=OE9pt000019T1;Parent=OE9pt000019;product=OE9pt000019P1;Description=rps14
OE9mt000004	30.9582	2.17408	0.691594	3.14358	0.00166892	0.0985924	OE9mt000004	ID=OE9mt000004T1;Parent=OE9mt000004;product=OE9mt000004P1;Description=nad2;Name=OE9mt000004T1
OE9A118930	13.8959	2.16628	0.572878	3.7814	0.00015595	0.0235078	OE9A118930	ID=OE9A118930T1;Parent=OE9A118930;Name=OE9A118930T1;product=OE9A118930P1;Description=pre-transcript cleavage factor Im 25 kDa subunit 2;Ontology_term=GO:0003729%2C GO:0005849%2C GO:0006378%2C GO:0016787
OE9A003599	23.5112	2.14567	0.442058	4.85381	1.21109e-06	0.000924572	OE9A003599	ID=OE9A003599T1;Parent=OE9A003599;Name=OE9A003599T1;product=OE9A003599P1;Description=probable arabinosyltransferase ARAD1;Ontology_term=GO:0016021
OE9A026152	82.9663	2.11078	0.564507	3.73916	0.00018464	0.0252165	OE9A026152	ID=OE9A026152T1;Parent=OE9A026152;Name=OE9A026152T1;product=OE9A026152P1;Description=probable WRKY transcription factor 70;Ontology_term=GO:0003700%2C GO:0005667%2C GO:0006355%2C GO:0043565%2C GO:0045449
OE9A012731	18.4846	2.10572	0.669894	3.14336	0.0016702	0.0985924	OE9A012731	ID=OE9A012731T1;Parent=OE9A012731;Name=OE9A012731T1;product=OE9A012731P1;Description=telomere repeat-binding factor 1-like;Ontology_term=GO:0000786%2C GO:0003677%2C GO:0005634%2C GO:0006334
OE9mt000007	83.6243	2.0743	0.537263	3.86086	0.000112989	0.0198074	OE9mt000007	ID=OE9mt000007T1;Parent=OE9mt000007;product=OE9mt000007P1;Description=rpl5;Name=OE9mt000007T1
OE9A057587	19.5541	2.06907	0.519058	3.98619	6.71421e-05	0.0146634	OE9A057587	ID=OE9A057587T1;Parent=OE9A057587;Name=OE9A057587T1;product=OE9A057587P1;Description=secoisolariciresinol dehydrogenase-like;Ontology_term=GO:0016491%2C GO:0055114
OE9A067968	53.1519	2.04831	0.588918	3.47809	0.000505006	0.0507782	OE9A067968	ID=OE9A067968T1;Parent=OE9A067968;Name=OE9A067968T1;product=OE9A067968P1;Description=LOV domain-containing;Ontology_term=GO:0000155%2C GO:0000160%2C GO:0005524%2C GO:0005622%2C GO:0009365%2C GO:0023014
OE9A070262	94.9274	2.03836	0.418225	4.87383	1.09457e-06	0.000893245	OE9A070262	ID=OE9A070262T1;Parent=OE9A070262;Name=OE9A070262T1;product=OE9A070262P1;Description=activator of 90 kDa heat shock ATPase homolog;Ontology_term=GO:0001671%2C GO:0005829%2C GO:0006950%2C GO:0032781%2C GO:0051087
OE9mt000036	83.87	2.03831	0.540654	3.77008	0.000163195	0.0235546	OE9mt000036	ID=OE9mt000036T1;Parent=OE9mt000036;product=OE9mt000036P1;Description=rpl5;Name=OE9mt000036T1
OE9mt000020	127.29	2.03812	0.521269	3.90991	9.2329e-05	0.0173677	OE9mt000020	ID=OE9mt000020T1;Parent=OE9mt000020;product=OE9mt000020P1;Description=atp8;Name=OE9mt000020T1
OE9A034853	92.5196	2.03184	0.513921	3.9536	7.69837e-05	0.015706	OE9A034853	ID=OE9A034853T1;Parent=OE9A034853;Name=OE9A034853T1;product=OE9A034853P1
OE9A091071	1306.23	2.02305	0.600594	3.36842	0.000755998	0.0642127	OE9A091071	ID=OE9A091071T1;Parent=OE9A091071;Name=OE9A091071T1;product=OE9A091071P1;Description=chaperone 1-like;Ontology_term=GO:0005524%2C GO:0019538
OE9A024135	227.889	2.02206	0.548575	3.68602	0.00022779	0.0289833	OE9A024135	ID=OE9A024135T1;Parent=OE9A024135;Name=OE9A024135T1;product=OE9A024135P1;Description=9-cis-epoxycarotenoid dioxygenase NCED1, chloroplastic-like;Ontology_term=GO:0016702%2C GO:0055114
OE9A062254	15956.4	2.01893	0.54501	3.70439	0.000211901	0.0272607	OE9A062254	ID=OE9A062254T1;Parent=OE9A062254;Name=OE9A062254T1;product=OE9A062254P1;Description=probable rhamnogalacturonate lyase B;Ontology_term=GO:0003824%2C GO:0005975%2C GO:0030246
OE9A106261	56.9497	2.01134	0.556549	3.61395	0.000301565	0.0356925	OE9A106261	ID=OE9A106261T1;Parent=OE9A106261;Name=OE9A106261T1;product=OE9A106261P1;Description=NRT1 PTR FAMILY isoform X1;Ontology_term=GO:0005215%2C GO:0006810%2C GO:0016020
OE9A041776	2195.24	2.01052	0.580919	3.46093	0.000538311	0.0527714	OE9A041776	ID=OE9A041776T1;Parent=OE9A041776;Name=OE9A041776T1;product=OE9A041776P1
OE9A024936	2216.07	2.00268	0.58014	3.45206	0.000556316	0.053676	OE9A024936	ID=OE9A024936T1;Parent=OE9A024936;Name=OE9A024936T1;product=OE9A024936P1

## Sheet: ShinyGO FC >2 
	Enrichment FDR	nGenes	Pathway Genes	Fold Enrichment	Pathways (click for details)	Genes
	0.029	3	65	21.6	GO:0051087 Chaperone binding	OE9A007381 OE9A057180 OE9A070262

## Sheet: DOWN FC <-2
List of Differential Expressed Genes (DEGs) FC <-2 T6_MockOnion
Gene ID	baseMean	log2FoldChange	lfcSE	stat	pvalue	padj	id gene	Description
OE9A077702	30.7053	-2.00539	0.616583	-3.25242	0.00114425	0.0798816	OE9A077702	ID=OE9A077702T1;Parent=OE9A077702;Name=OE9A077702T1;product=OE9A077702P1;Description=12-oxophytodienoate reductase 11;Ontology_term=GO:0010181%2C GO:0016491%2C GO:0055114
OE9A113707	18.5074	-2.03911	0.640658	-3.18284	0.00145837	0.0915486	OE9A113707	ID=OE9A113707T1;Parent=OE9A113707;Name=OE9A113707T1;product=OE9A113707P1;Description=uncharacterized protein LOC111313976;Ontology_term=GO:0016020
OE9A081779	17.9786	-2.05231	0.612189	-3.35241	0.000801122	0.0662052	OE9A081779	ID=OE9A081779T1;Parent=OE9A081779;Name=OE9A081779T1;product=OE9A081779P1;Description=TRIGALACTOSYLDIACYLGLYCEROL 4, chloroplastic;Ontology_term=GO:0005488%2C GO:0006869%2C GO:0009941%2C GO:0016020
OE9A094040	40.2804	-2.06149	0.59283	-3.47737	0.000506365	0.0507782	OE9A094040	ID=OE9A094040T1;Parent=OE9A094040;Name=OE9A094040T1;product=OE9A094040P1;Description=lob domain-containing 18;Ontology_term=GO:0048856
OE9A029919	585.494	-2.10339	0.368324	-5.71072	1.12499e-08	2.95822e-05	OE9A029919	ID=OE9A029919T1;Parent=OE9A029919;Name=OE9A029919T1;product=OE9A029919P1;Description=ferritin-4, chloroplastic-like;Ontology_term=GO:0004322%2C GO:0005623%2C GO:0006826%2C GO:0006879%2C GO:0008199%2C GO:0015994%2C GO:0055114
OE9A100504	25.9036	-2.20509	0.68096	-3.23821	0.00120284	0.0820111	OE9A100504	ID=OE9A100504T1;Parent=OE9A100504;Name=OE9A100504T1;product=OE9A100504P1
OE9A006607	12.7564	-2.25676	0.718349	-3.14159	0.00168032	0.0989215	OE9A006607	ID=OE9A006607T1;Parent=OE9A006607;Name=OE9A006607T1;product=OE9A006607P1;Description=uncharacterized protein LOC111395495;Ontology_term=GO:0016021
OE9A083611	15.1186	-2.31492	0.670296	-3.45357	0.00055322	0.053676	OE9A083611	ID=OE9A083611T1;Parent=OE9A083611;Name=OE9A083611T1;product=OE9A083611P1;Description=pentatricopeptide repeat-containing At2g29760, chloroplastic-like;Ontology_term=GO:0005515
OE9A109957	12.934	-2.31955	0.714752	-3.24524	0.0011735	0.0809683	OE9A109957	ID=OE9A109957T1;Parent=OE9A109957;Name=OE9A109957T1;product=OE9A109957P1;md5=71e14a70084a0a9ec8040ab64ca10c76;INTERPRO=<table><tr><th>DB</th><th>ID</th><th>Description</th></tr><tr><td>PANTHER</td><td>PTHR10412</td><td></td></tr><tr><td>PANTHER</td><td>PTHR10412:SF10</td><td></td></tr><tr><td>Pfam</td><td>PF03200</td><td>Glycosyl hydrolase family 63 C-terminal domain</td></tr><tr><td>SUPERFAMILY<…
OE9A073885	22.5072	-2.32311	0.700782	-3.31502	0.000916351	0.0713563	OE9A073885	ID=OE9A073885T1;Parent=OE9A073885;Name=OE9A073885T1;product=OE9A073885P1;Description=tetrahydrocannabinolic acid synthase-like;Ontology_term=GO:0016614%2C GO:0050660%2C GO:0055114
OE9A095315	19.7195	-2.34896	0.649199	-3.61824	0.000296614	0.0354528	OE9A095315	ID=OE9A095315T1;Parent=OE9A095315;Name=OE9A095315T1;product=OE9A095315P1;Description=ABC transporter I family member 6, chloroplastic;Ontology_term=GO:0005524%2C GO:0009570%2C GO:0009793%2C GO:0010027%2C GO:0042626%2C GO:0055085
OE9A045257	852.585	-2.35289	0.366095	-6.42699	1.30152e-10	7.70044e-07	OE9A045257	ID=OE9A045257T1;Parent=OE9A045257;Name=OE9A045257T1;product=OE9A045257P1;Description=beta-amylase 3, chloroplastic;Ontology_term=GO:0000272%2C GO:0005982%2C GO:0005985%2C GO:0016161
OE9A013617	16.5059	-2.37602	0.754941	-3.14729	0.00164792	0.0985924	OE9A013617	ID=OE9A013617T1;Parent=OE9A013617;Name=OE9A013617T1;product=OE9A013617P1;Description=tyrosyl-DNA phosphodiesterase 2;Ontology_term=GO:0008270
OE9A071406	16.421	-2.41811	0.621217	-3.89254	9.92014e-05	0.0179214	OE9A071406	ID=OE9A071406T1;Parent=OE9A071406;Name=OE9A071406T1;product=OE9A071406P1
OE9A106126	21.6718	-2.42158	0.618108	-3.91773	8.93858e-05	0.0173394	OE9A106126	ID=OE9A106126T1;Parent=OE9A106126;Name=OE9A106126T1;product=OE9A106126P1;Description=thioredoxin CITRX, chloroplastic;Ontology_term=GO:0000103%2C GO:0005515%2C GO:0006118%2C GO:0006457%2C GO:0006662%2C GO:0009536%2C GO:0015035%2C GO:0016671%2C GO:0034051%2C GO:0034599%2C GO:0045454%2C GO:0055114
OE9A058786	142.36	-2.45438	0.31671	-7.74963	9.21639e-15	1.09058e-10	OE9A058786	ID=OE9A058786T1;Parent=OE9A058786;Name=OE9A058786T1;product=OE9A058786P1
OE9A114387	146.492	-2.49994	0.567812	-4.40275	1.06886e-05	0.00412077	OE9A114387	ID=OE9A114387T1;Parent=OE9A114387;Name=OE9A114387T1;product=OE9A114387P1;Description=C-repeat dehydration-responsive element-binding factor 4;Ontology_term=GO:0003677%2C GO:0003700%2C GO:0005634%2C GO:0005667%2C GO:0006355%2C GO:0045449
OE9A112182	27.8698	-2.53297	0.612539	-4.1352	3.54644e-05	0.00999166	OE9A112182	ID=OE9A112182T1;Parent=OE9A112182;Name=OE9A112182T1;product=OE9A112182P1;Description=homeobox-leucine zipper ATHB-40-like;Ontology_term=GO:0005634%2C GO:0006355%2C GO:0043565
OE9A040053	13.6742	-2.53773	0.746246	-3.40066	0.000672226	0.0601722	OE9A040053	ID=OE9A040053T1;Parent=OE9A040053;Name=OE9A040053T1;product=OE9A040053P1;Description=serine threonine- kinase ATG1c-like isoform X1;Ontology_term=GO:0004672%2C GO:0005524%2C GO:0006468
OE9A107186	678.097	-2.56248	0.373471	-6.86127	6.82515e-12	5.38413e-08	OE9A107186	ID=OE9A107186T1;Parent=OE9A107186;Name=OE9A107186T1;product=OE9A107186P1;Description=beta-amylase 3, chloroplastic-like;Ontology_term=GO:0000272%2C GO:0005982%2C GO:0005985%2C GO:0016161
OE9A120650	35.6973	-2.58523	0.685323	-3.77228	0.000161763	0.0235546	OE9A120650	ID=OE9A120650T1;Parent=OE9A120650;Name=OE9A120650T1;product=OE9A120650P1
OE9A110357	12.8521	-2.59715	0.779109	-3.33348	0.000857654	0.0689264	OE9A110357	ID=OE9A110357T1;Parent=OE9A110357;Name=OE9A110357T1;product=OE9A110357P1;Description=homeobox-leucine zipper ATHB-6-like;Ontology_term=GO:0003700%2C GO:0005667%2C GO:0006355%2C GO:0016740%2C GO:0043565%2C GO:0045449
OE9A070143	58.5291	-2.78175	0.606148	-4.58924	4.44872e-06	0.00228877	OE9A070143	ID=OE9A070143T1;Parent=OE9A070143;Name=OE9A070143T1;product=OE9A070143P1;Description=fatty acid desaturase 4, chloroplastic-like;Ontology_term=GO:0005737%2C GO:0031625%2C GO:0061630
OE9A096509	18.6786	-2.89392	0.696945	-4.15229	3.2917e-05	0.00938572	OE9A096509	ID=OE9A096509T2;Parent=OE9A096509;Name=OE9A096509T2;product=OE9A096509P2
OE9A090760	18.3494	-3.79773	1.02508	-3.7048	0.000211554	0.0272607	OE9A090760	ID=OE9A090760T1;Parent=OE9A090760;Name=OE9A090760T1;product=OE9A090760P1
OE9A113221	20.1657	-4.49302	1.13771	-3.94918	7.84185e-05	0.015862	OE9A113221	ID=OE9A113221T1;Parent=OE9A113221;Name=OE9A113221T1;product=OE9A113221P1;Description=serine carboxypeptidase-like 31;Ontology_term=GO:0004185%2C GO:0016021%2C GO:0051603
OE9A044979	16.1758	-4.50981	1.38333	-3.26011	0.00111369	0.0795078	OE9A044979	ID=OE9A044979T1;Parent=OE9A044979;Name=OE9A044979T1;product=OE9A044979P1;Description=kirola-like;Ontology_term=GO:0006952%2C GO:0009607

## Sheet: ShinyGO FC <-2
	Enrichment FDR	nGenes	Pathway Genes	Fold Enrichment	Pathways (click for details)	Genes
	0.0025	2	30	137.6	GO:0016161 Beta-amylase activity	OE9A045257 OE9A107186
	0.0025	2	27	152.9	GO:0000272 Polysaccharide catabolic process	OE9A045257 OE9A107186
